# Supplementary material for: Extracellular Vesicle Proteomes Shed Light on the Evolutionary, Interactive, and Functional Divergence of Their Biogenesis Mechanisms
Source: Front Cell Dev Biol. 2021 Oct 1;9:734950. doi: 10.3389/fcell.2021.734950 (PMC8517337; doi:10.3389/fcell.2021.734950)
Supplement: Supplementary Table 1 — An integrated EV proteomic dataset by compiling the entire list of shotgun proteomic datasets including a detailed description of the table. (A) Description of the proteomic datasets in EVpedia used in this study. (B) Definition of differential ultracentrifugation (DUC) criteria used for classifying datasets. (C) A list of methods used for isolation of EVs for proteomic datasets in EVpedia, and how they were classified. [file Table_1.XLSX]

## Sheet: Table detail
Supplementary Table 1
Table	Table title	Description	Column title	Details
1A	List of entire proteomic datasets in EVpedia	Raw data downloaded from EVpedia database	DatasetIndex	Unique index for each EV proteomics dataset
			MethodIndex	Unique index for each EV purification method, identical to Supplementary Table 1C
			Dataset Acc	Accession number of each proteomics dataset, excepted from EVpedia
			Dataset Type	EV type classified according to our criteria defined in Supplementary Table 1B and 1C
			Pubmed ID	Pubmed ID of dataset's reference paper
			Bibliography	Detailed information of dataset's reference paper
			Title	Title of dataset's reference paper
			Kingdom	Kingdom of EV-originating source
			Species	Species of EV-originating source
			Method	Method of EV purification (in vivo, ex vivo, and in vitro)
			Source	Cell type of EV-originating source
			Sample	Experimental sample name if one paper compares multiple proteomics datasets
			Purification method	Detailed information of EV purification
			Mass spec method	Detailed information of proteomic analysis
			# identified proteins	# identified proteins of proteomic analysis
1B	Definition of differential ultracentrifugation criteria used for classifying datasets	The cutoff for the each EV type according to ultracentrifugation speed. Among all types, we use small and large EV for furthere analysis.	Index	Row index
			Purification Condition	Criteria to classify EV types
			Isolated Fraction	Defined EV types
1C	Classified EV proteomic dataset in EVpedia	List of unique EV purfication methods and their classificed EV types, depend on the definition of Supplementary Table 1B.	MethodIndex	Unique index for each EV purification method, identical to Supplementary Table 1A
			Dataset Type	EV type classified according to our criteria defined in Supplementary Table 1B and 1C
			MaxPreclearing (x1000g)	Max centrifugation speed for preclearing
			MaxUltracentrifugation (x1000g)	Max centrifugation speed for precipitation
			MinFiltration (uM)	Min pore size for filteration
			MaxMWCO (kDa)	Molecular weight cut-off for concentration
			Other	Additional method used to purify EV
			PurificationDescription	Detailed information of EV purification

## Sheet: SupTable1A
Supplementary Table 1A. List of entire proteomic datasets in EVpedia
DatasetIndex	MethodIndex	Dataset Acc	Dataset Type	Pubmed ID	Bibliography	Title	Kingdom	Species	Method	Source	Sample	Purification method	Mass spec method	# identified proteins
1	1	127468400101	Both	12746840	Prostate. 2003 Jul 1;56(2):150-61.	Proteomic analysis of human prostasomes.	Eukaryote	Homo sapiens	In vivo	Seminal fluid	Normal donors	Preclearing (1000 g) > Ultracentrifugation (105,000 g)	LC-ESI-MS/MS	132
2	2	152109720101	sEV	15210972	Proc Natl Acad Sci U S A. 2004 Jun 29;101(26):9683-8. Epub 2004 Jun 21.	Cells release prions in association with exosomes.	Eukaryote	Mus musculus	In vitro	Neuroglial cell (Mov)	Normal	Preclearing (3000 g, 4500 g, 10,000 g) > Ultracentrifugation (100,000 g) > Sucrose cushion ultracentrifugation (100,000 g)	1DE-LC-ESI-MS/MS	77
3	3	153262890101	sEV	15326289	Proc Natl Acad Sci U S A. 2004 Sep 7;101(36):13368-73. Epub 2004 Aug 23.	Identification and proteomic profiling of exosomes in human urine.	Eukaryote	Homo sapiens	In vitro	Urine	Normal donors	Preclearing (17,000 g) > Ultracentrifugation (200,000 g)	1DE-LC-ESI-MS/MS	294
4	4	160817910101	Both	16081791	J Immunol. 2005 Aug 15;175(4):2237-43.	Proteomic analysis of microglia-derived exosomes: metabolic role of the aminopeptidase CD13 in neuropeptide catabolism.	Eukaryote	Mus musculus	In vitro	Microglia cell (N9)	Normal	Filtration (0.22 ???m) > Ultracentrifugation (100,000 g)	1DE-LC-ESI-MS/MS	59
5	5	161031140101	MV	16103114	J Biol Chem. 2005 Nov 18;280(46):38383-94. Epub 2005 Aug 15.	Biochemical and functional characterization of membrane blebs purified from Neisseria meningitidis serogroup B.	Prokaryote	Neisseria meningitidis	In vitro	Neisseria meningitidis Serogroup B	Normal	Filtration (0.22 ???m) > Concentration (100 kDa)	1) 1DE-MALDI-MS/MS, 2) 1DE-LC-ESI-MS/MS	50
6	6	162124020101	Both	16212402	J Proteome Res. 2005 Sep-Oct;4(5):1516-21.	The platelet microparticle proteome.	Eukaryote	Homo sapiens	In vivo	Platelet	Normal donors	Preclearing (710 g) > Ultracentrifugation (150,000 g)	1DE-LC-ESI-MS/MS	555
7	7	163421390101	lEV	16342139	Proteomics. 2006 Jan;6(1):153-71.	Proteomic analysis of malignant lymphocyte membrane microparticles using double ionization coverage optimization.	Eukaryote	Homo sapiens	In vitro	T-lymphocytic cell	Treated by phytohemagglutinin	Preclearing (750 g, 1500 g) > Ultracentrifugation (15,000 g)	1DE-LC-ESI-MS/MS	253
8	7	163421390102	lEV	16342139	Proteomics. 2006 Jan;6(1):153-71.	Proteomic analysis of malignant lymphocyte membrane microparticles using double ionization coverage optimization.	Eukaryote	Homo sapiens	In vitro	T-lymphocytic cell	Treated by actinomycin D	Preclearing (750 g, 1500 g) > Ultracentrifugation (15,000 g)	1DE-LC-ESI-MS/MS	308
9	7	163421390103	lEV	16342139	Proteomics. 2006 Jan;6(1):153-71.	Proteomic analysis of malignant lymphocyte membrane microparticles using double ionization coverage optimization.	Eukaryote	Homo sapiens	In vitro	Chronic B-cell	Treated by actinomycin D	Preclearing (750 g, 1500 g) > Ultracentrifugation (15,000 g)	1DE-LC-ESI-MS/MS	414
10	8	164568810101	MV	16456881	Proteomics. 2006 Mar;6(6):1856-66.	Outer membrane vesicles from group B Neisseria meningitidis delta gna33 mutant: proteomic and immunological comparison with detergent-derived outer membrane vesicles.	Prokaryote	Neisseria meningitidis	In vitro	Neisseria meningitidis MC58	??gna33	Filtration (0.22 ???m) > Ultracentrifugation (200,000 g)	1) 1DE-MALDI-MS/MS, 2) 2DE-MALDI-MS/MS	63
11	8	164568810102	MV	16456881	Proteomics. 2006 Mar;6(6):1856-66.	Outer membrane vesicles from group B Neisseria meningitidis delta gna33 mutant: proteomic and immunological comparison with detergent-derived outer membrane vesicles.	Prokaryote	Neisseria meningitidis	In vitro	Neisseria meningitidis NZ98/254	??gna33	Filtration (0.22 ???m) > Ultracentrifugation (200,000 g)	1) 1DE-MALDI-MS/MS, 2) 2DE-MALDI-MS/MS	63
12	9	170963830101	sEV	17096383	J Cell Physiol. 2007 Feb;210(2):325-35.	Analysis of the extracellular matrix vesicle proteome in mineralizing osteoblasts.	Eukaryote	Mus musculus	In vitro	Osteoblast (MC3T3-E1)	Normal	Preclearing (2000 g, 20,000 g) > Ultracentrifugation (100,000 g)	1DE-SCX-LC-ESI-MS/MS	533
13	10	174785590101	sEV	17478559	Endocrinology. 2007 Aug;148(8):3850-62. Epub 2007 May 3.	Identification and characterization of microvesicles secreted by 3T3-L1 adipocytes: redox- and hormone-dependent induction of milk fat globule-epidermal growth factor 8-associated microvesicles.	Eukaryote	Mus musculus	In vitro	Adipocyte (3T3-L1)	Normal	Preclearing (1000 g, 15,000 g) > Ultracentrifugation (100,000 g) > Sucrose density gradient ultracentrifugation (200,000 g)	LC-ESI-MS/MS	80
14	11	174861130101	sEV	17486113	Nat Cell Biol. 2007 Jun;9(6):654-9. Epub 2007 May 7.	Exosome-mediated transfer of mRNAs and microRNAs is a novel mechanism of genetic exchange between cells.	Eukaryote	Mus musculus	In vitro	Mast cell (MC9)	Normal	Preclearing (500 g, 16,500 g) > Filtration (0.22 ???m) > Ultracentrifugation (120,000 g)	1DE-LC-ESI-MS/MS	268
15	12	176410640101	sEV	17641064	J Immunol. 2007 Aug 1;179(3):1969-78.	Exosomes with immune modulatory features are present in human breast milk.	Eukaryote	Homo sapiens	In vivo	Breast milk	Colostrumb	Preclearing (300 g, 3000 g) > Filtration (1.2, 0.8, 0.4, 0.2 ???m) > Preclearing (10,000 g) > Ultracentrifugation (100,000 g) > Sucrose density gradient ultracentrifugation (79,000 g)	LC-ESI-MS/MS	54
16	12	176410640102	sEV	17641064	J Immunol. 2007 Aug 1;179(3):1969-78.	Exosomes with immune modulatory features are present in human breast milk.	Eukaryote	Homo sapiens	In vivo	Breast milk	Mature milk	Preclearing (300 g, 3000 g) > Filtration (1.2, 0.8, 0.4, 0.2 ???m) > Preclearing (10,000 g) > Ultracentrifugation (100,000 g) > Sucrose density gradient ultracentrifugation (79,000 g)	LC-ESI-MS/MS	54
17	13	177870320101	MV	17787032	Proteomics. 2007 Sep;7(17):3143-53.	Global proteomic profiling of native outer membrane vesicles derived from Escherichia coli.	Prokaryote	Escherichia coli	In vitro	Escherichia coli DH5??	Normal	Preclearing (6000 g) > Filtration (0.45 ???m) > Concentration (100 kDa) > Preclearing (6000 g) > Filtration (0.45 ???m) > Preclearing (20,000 g, 40,000 g) > Ultracentrifugation (150,000 g) > Sucrose density gradient ultracentrifugation (200,000 g)	LC-ESI-MS/MS	132
18	14	179561430101	Both	17956143	J Proteome Res. 2007 Dec;6(12):4646-55. Epub 2007 Oct 24.	Proteomic analysis of microvesicles derived from human colorectal cancer cells.	Eukaryote	Homo sapiens	In vitro	Colorectal cancer cell (HT29)	Normal	Preclearing (500 g, 800 g) > Concentration (100 kDa) > Sucrose cushion ultracentrifugation (100,000 g) > Sucrose density gradient ultracentrifugation (150,000 g)	1DE-LC-ESI-MS/MS	444
19	15	180399400101	sEV	18039940	Eukaryot Cell. 2008 Jan;7(1):58-67. Epub 2007 Nov 26.	Extracellular vesicles produced by Cryptococcus neoformans contain protein components associated with virulence.	Eukaryote	Cryptococcus neoformans	In vitro	Cryptococcus neoformans	Normal	Preclearing (4000 g, 15,000 g) > Concentration (100 kDa) > Preclearing (4000 g, 15,000 g) > Filtration (0.8 ???m) > Ultracentrifugation (100,000 g)	LC-ESI-MS/MS	72
20	16	180953560101	#N/A	18095356	Proteomics. 2008 Jan;8(1):192-205.	Proteome analysis of matrix vesicles isolated from femurs of chicken embryo.	Eukaryote	Gallus gallus	In vivo	17-day-old embryo leg bone	Normal	Filtration (Nylon membrane) > Preclearing (10,000 g) > Ultracentrifugation (80,000 g)	1DE-LC-ESI-MS/MS	84
21	17	183460240101	#N/A	18346024	Transfusion. 2008 May;48(5):827-35.	The proteome of red cell membranes and vesicles during storage in blood bank conditions.	Eukaryote	Homo sapiens	Ex vivo	Red blood cell	Microvesicle, Storage day 3	Preclearing (1550 g) > Ultracentrifugation (40,000 g)	1DE-LC-ESI-MS/MS	243
22	17	183460240102	#N/A	18346024	Transfusion. 2008 May;48(5):827-35.	The proteome of red cell membranes and vesicles during storage in blood bank conditions.	Eukaryote	Homo sapiens	Ex vivo	Red blood cell	Microvesicle, Storage day 21	Preclearing (1550 g) > Ultracentrifugation (40,000 g)	1DE-LC-ESI-MS/MS	217
23	17	183460240103	#N/A	18346024	Transfusion. 2008 May;48(5):827-35.	The proteome of red cell membranes and vesicles during storage in blood bank conditions.	Eukaryote	Homo sapiens	Ex vivo	Red blood cell	Microvesicle, Storage day 42	Preclearing (1550 g) > Ultracentrifugation (40,000 g)	1DE-LC-ESI-MS/MS	321
24	18	183460240104	sEV	18346024	Transfusion. 2008 May;48(5):827-35.	The proteome of red cell membranes and vesicles during storage in blood bank conditions.	Eukaryote	Homo sapiens	Ex vivo	Red blood cell	Nanovesicle, Storage day 3	Preclearing (1550 g, 40,000 g) > Ultracentrifugation (100,000 g)	1DE-LC-ESI-MS/MS	188
25	18	183460240105	sEV	18346024	Transfusion. 2008 May;48(5):827-35.	The proteome of red cell membranes and vesicles during storage in blood bank conditions.	Eukaryote	Homo sapiens	Ex vivo	Red blood cell	Nanovesicle, Storage day 21	Preclearing (1550 g, 40,000 g) > Ultracentrifugation (100,000 g)	1DE-LC-ESI-MS/MS	181
26	18	183460240106	sEV	18346024	Transfusion. 2008 May;48(5):827-35.	The proteome of red cell membranes and vesicles during storage in blood bank conditions.	Eukaryote	Homo sapiens	Ex vivo	Red blood cell	Nanovesicle, Storage day 42	Preclearing (1550 g, 40,000 g) > Ultracentrifugation (100,000 g)	1DE-LC-ESI-MS/MS	161
27	19	183733570101	sEV	18373357	J Proteome Res. 2008 May;7(5):2088-96. doi: 10.1021/pr700775x. Epub 2008 Mar 29.	Isolation and identification of potential urinary microparticle biomarkers of bladder cancer.	Eukaryote	Homo sapiens	In vivo	Urine	Normal donors	Preclearing (250 g, 17,000 g) > Ultracentrifugation (200,000 g)	1DE-LC-ESI-MS/MS	449
28	19	183733570102	sEV	18373357	J Proteome Res. 2008 May;7(5):2088-96. doi: 10.1021/pr700775x. Epub 2008 Mar 29.	Isolation and identification of potential urinary microparticle biomarkers of bladder cancer.	Eukaryote	Homo sapiens	In vivo	Urine	Patients of bladder cancer	Preclearing (250 g, 17,000 g) > Ultracentrifugation (200,000 g)	1DE-LC-ESI-MS/MS	294
29	20	184829930101	Both	18482993	Hum Reprod. 2008 Aug;23(8):1698-707. doi: 10.1093/humrep/den181. Epub 2008 May 14.	Protein composition of human epididymosomes collected during surgical vasectomy reversal: a proteomic and genomic approach.	Eukaryote	Homo sapiens	In vivo	Epididymal fluid	Normal	Preclearing (3000 g) > Ultracentrifugation (120,000 g)	1DE-LC-ESI-MS/MS	126
30	21	185637380101	Both	18563738	Proteomics. 2008 Jun;8(12):2430-46. doi: 10.1002/pmic.200701029.	Comparative proteomic analysis of PAI-1 and TNF-alpha-derived endothelial microparticles.	Eukaryote	Homo sapiens	In vitro	Endothelial cell (HUVEC)	Normal	Preclearing (200 g) > Ultracentrifugation (100,000 g)	1DE-LC-ESI-MS/MS	781
31	21	185637380102	Both	18563738	Proteomics. 2008 Jun;8(12):2430-46. doi: 10.1002/pmic.200701029.	Comparative proteomic analysis of PAI-1 and TNF-alpha-derived endothelial microparticles.	Eukaryote	Homo sapiens	In vitro	Endothelial cell (HUVEC)	Treated by TNF-alpha	Preclearing (200 g) > Ultracentrifugation (100,000 g)	1DE-LC-ESI-MS/MS	676
32	21	185637380103	Both	18563738	Proteomics. 2008 Jun;8(12):2430-46. doi: 10.1002/pmic.200701029.	Comparative proteomic analysis of PAI-1 and TNF-alpha-derived endothelial microparticles.	Eukaryote	Homo sapiens	In vitro	Endothelial cell (HUVEC)	Treated by PAI-1	Preclearing (200 g) > Ultracentrifugation (100,000 g)	1DE-LC-ESI-MS/MS	640
33	22	185704540101	#N/A	18570454	J Proteome Res. 2008 Aug;7(8):3475-80. doi: 10.1021/pr800225z. Epub 2008 Jun 21.	Proteomic analysis of exosomes from human neural stem cells by flow field-flow fractionation and nanoflow liquid chromatography-tandem mass spectrometry.	Eukaryote	Homo sapiens	In vitro	Neural stem cell (HB1.F3)	Normal	Preclearing (1000 g) > Concentration (100 kDa) > Flow field-flow fractionation	LC-ESI-MS/MS	97
34	23	188191030101	sEV	18819103	Prostate. 2009 Feb 1;69(2):159-67. doi: 10.1002/pros.20860.	Structural heterogeneity and protein composition of exosome-like vesicles (prostasomes) in human semen.	Eukaryote	Homo sapiens	In vivo	Seminal fluid	Normal donors	Preclearing (1000 g, 10,000 g) > Ultracentrifugation (100,000 g) > Sucrose density gradient ultracentrifugation (78,000 g) > Ultracentrifugation (100,000 g)	1DE-LC-ESI-MS/MS	412
35	24	190284520101	Both	19028452	Biochem Biophys Res Commun. 2009 Jan 16;378(3):433-8. doi: 10.1016/j.bbrc.2008.11.050. Epub 2008 Nov 24.	Proteomic profiling of human plasma exosomes identifies PPARgamma as an exosome-associated protein.	Eukaryote	Homo sapiens	In vivo	Plasma	Normal donors	Filtration (0.22 ???m) > Gel exclusion chromatography > Sucrose density gradient ultracentrifugation (175,000 g) > Ultracentrifugation (100,000 g) > Sucrose cushion ultracentrifugation (175,000 g)	1DE-LC-ESI-MS/MS	59
36	3	190568670101	sEV	19056867	J Am Soc Nephrol. 2009 Feb;20(2):363-79. doi: 10.1681/ASN.2008040406. Epub 2008 Dec 3.	Large-scale proteomics and phosphoproteomics of urinary exosomes.	Eukaryote	Homo sapiens	In vivo	Urine	Normal donors	Preclearing (17,000 g) > Ultracentrifugation (200,000 g)	1DE-LC-ESI-MS/MS	1314
37	25	191583520101	sEV	19158352	J Am Soc Nephrol. 2009 Feb;20(2):278-88. doi: 10.1681/ASN.2008060564. Epub 2009 Jan 21.	Characterization of PKD protein-positive exosome-like vesicles.	Eukaryote	Homo sapiens	In vivo	Urine	Patients of autosomal recessive polycystic kidney disease	Preclearing (15,000 g) > Filtration (8 ???m) > Ultracentrifugation (150,000 g) > Sucrose/D2O density ultracentrifugation (200,000 g)	1DE-LC-ESI-MS/MS	552
38	26	191997080101	sEV	19199708	J Proteome Res. 2009 Mar;8(3):1304-14. doi: 10.1021/pr800658c.	Proteomic analysis of human parotid gland exosomes by multidimensional protein identification technology (MudPIT).	Eukaryote	Homo sapiens	In vivo	Ductal parotid saliva	Normal donors	Preclearing (300 g, 10,000 g) > Ultracentrifugation (200,000 g)	SCX-LC-ESI-MS/MS	467
39	27	193273520101	sEV	19327352	Exp Cell Res. 2009 Jul 1;315(11):1875-88. doi: 10.1016/j.yexcr.2009.03.010. Epub 2009 Mar 24.	Anchorage-independent growth of breast carcinoma cells is mediated by serum exosomes.	Eukaryote	Bos taurus	In vivo	Fetal bovine serum	Normal	Preclearing (20,000 g) > Ultracentrifugation (100,000 g)	1DE-LC-ESI-MS/MS	119
40	28	193511510101	Both	19351151	J Proteome Res. 2009 Jun;8(6):2851-62. doi: 10.1021/pr900009y.	Characterization of vesicles secreted from insulinoma NIT-1 cells.	Eukaryote	Mus musculus	In vitro	Pancreatic beta cell (NIT-1)	Normal	Preclearing (100 g) > Ultracentrifugation (22,300 g) > Sucrose density gradient ultracentrifugation (200,000 g)	1DE-LC-ESI-MS/MS	267
41	29	193677020101	sEV	19367702	J Proteome Res. 2008 Dec;7(12):5157-66.	Characterization and comprehensive proteome profiling of exosomes secreted by hepatocytes.	Eukaryote	Rattus norvegicus	In vitro	Hepatocyte	Normal	Preclearing (500 g) > Filtration (0.22 ???m) > Preclearing (10,000 g) > Ultracentrifugation (100,000 g)	1DE-LC-ESI-MS/MS	251
42	30	193692280101	lEV	19369228	Blood. 2009 Jul 16;114(3):723-32. doi: 10.1182/blood-2009-02-205930. Epub 2009 Apr 15.	Proteomic analysis reveals presence of platelet microparticles in endothelial progenitor cell cultures.	Eukaryote	Homo sapiens	Ex vivo	Endothelial progenitor cell	Normal	Preclearing (400 g, 12,500 g) > Ultracentrifugation (20,500 g)	1DE-LC-ESI-MS/MS	611
43	31	194133450101	lEV	19413345	J Proteome Res. 2009 Jul;8(7):3346-54. doi: 10.1021/pr801102c.	Proteomic analysis of malignant B-cell derived microparticles reveals CD148 as a potentially useful antigenic biomarker for mantle cell lymphoma diagnosis.	Eukaryote	Homo sapiens	Ex vivo	B cell	Patients of chronic lymphocytic leukemia	Preclearing (750 g, 1000 g) > Ultracentrifugation (15,000 g)	1DE-LC-ESI-MS/MS	82
44	31	194133450102	lEV	19413345	J Proteome Res. 2009 Jul;8(7):3346-54. doi: 10.1021/pr801102c.	Proteomic analysis of malignant B-cell derived microparticles reveals CD148 as a potentially useful antigenic biomarker for mantle cell lymphoma diagnosis.	Eukaryote	Homo sapiens	Ex vivo	B cell	Patients of mantle cell lymphoma	Preclearing (750 g, 1000 g) > Ultracentrifugation (15,000 g)	1DE-LC-ESI-MS/MS	68
45	31	194133450103	lEV	19413345	J Proteome Res. 2009 Jul;8(7):3346-54. doi: 10.1021/pr801102c.	Proteomic analysis of malignant B-cell derived microparticles reveals CD148 as a potentially useful antigenic biomarker for mantle cell lymphoma diagnosis.	Eukaryote	Homo sapiens	Ex vivo	B cell	Patients of small cell lymphoma	Preclearing (750 g, 1000 g) > Ultracentrifugation (15,000 g)	1DE-LC-ESI-MS/MS	106
46	32	195302240101	Both	19530224	J Cell Physiol. 2009 Oct;221(1):221-31. doi: 10.1002/jcp.21847.	Profile of exosomes related proteins released by differentiated and undifferentiated human keratinocytes.	Eukaryote	Homo sapiens	Ex vivo	Keratinocyte	Undifferentiated	Preclearing (6000 g) > Concentration (100 kDa) > Sucrose/D2O cushion ultracentrifugation (100,000 g)	1DE-LC-ESI-MS/MS	86
47	32	195302240102	Both	19530224	J Cell Physiol. 2009 Oct;221(1):221-31. doi: 10.1002/jcp.21847.	Profile of exosomes related proteins released by differentiated and undifferentiated human keratinocytes.	Eukaryote	Homo sapiens	Ex vivo	Keratinocyte	Differentiated	Preclearing (6000 g) > Concentration (100 kDa) > Sucrose/D2O cushion ultracentrifugation (100,000 g)	1DE-LC-ESI-MS/MS	157
48	33	195488940101	MV	19548894	FEMS Microbiol Lett. 2009 Aug;297(2):150-6. doi: 10.1111/j.1574-6968.2009.01669.x. Epub 2009 Jun 3.	Proteome analysis of outer membrane vesicles from a clinical Acinetobacter baumannii isolate.	Prokaryote	Acinetobacter baumannii	In vitro	Acinetobacter baumannii DU202	Normal	Preclearing (6000 g) > Filtration (0.2 ???m) > Concentration (100 kDa) > Ultracentrifugation (150,000 g) > Sucrose density gradient ultracentrifugation (200,000 g) > Ultracentrifugation (150,000 g)	1DE-LC-ESI-MS/MS	131
49	34	195489090101	lEV	19548909	J Thromb Haemost. 2009 Jun;7(6):1019-28. doi: 10.1111/j.1538-7836.2009.03434.x.	Differential stimulation of monocytic cells results in distinct populations of microparticles.	Eukaryote	Homo sapiens	In vitro	Monocyte (THP-1)	Stimulated by IgG	Preclearing (750 g, 1500 g) > Ultracentrifugation (16,000 g)	1DE-LC-ESI-MS/MS	177
50	34	195489090102	lEV	19548909	J Thromb Haemost. 2009 Jun;7(6):1019-28. doi: 10.1111/j.1538-7836.2009.03434.x.	Differential stimulation of monocytic cells results in distinct populations of microparticles.	Eukaryote	Homo sapiens	In vitro	Monocyte (THP-1)	Stimulated by P-selectin-Ig	Preclearing (750 g, 1500 g) > Ultracentrifugation (16,000 g)	1DE-LC-ESI-MS/MS	282
51	34	195489090103	lEV	19548909	J Thromb Haemost. 2009 Jun;7(6):1019-28. doi: 10.1111/j.1538-7836.2009.03434.x.	Differential stimulation of monocytic cells results in distinct populations of microparticles.	Eukaryote	Homo sapiens	In vitro	Monocyte (THP-1)	Normal	Preclearing (750 g, 1500 g) > Ultracentrifugation (16,000 g)	1DE-LC-ESI-MS/MS	408
52	34	195489090104	lEV	19548909	J Thromb Haemost. 2009 Jun;7(6):1019-28. doi: 10.1111/j.1538-7836.2009.03434.x.	Differential stimulation of monocytic cells results in distinct populations of microparticles.	Eukaryote	Homo sapiens	In vitro	Monocyte (THP-1)	Stimulated by LPS	Preclearing (750 g, 1500 g) > Ultracentrifugation (16,000 g)	1DE-LC-ESI-MS/MS	737
53	35	195673680101	#N/A	19567368	Mol Cell Proteomics. 2009 Oct;8(10):2201-11. doi: 10.1074/mcp.M900203-MCP200. Epub 2009 Jun 29.	Proteomics characterization of cell membrane blebs in human retinal pigment epithelium cells.	Eukaryote	Homo sapiens	In vitro	Retinal pigment epithelium cell (ARPE-19)	Normal	Pelleting (100 g)	1DE-LC-ESI-MS/MS	305
54	36	198062570101	Both	19806257	Thromb Haemost. 2009 Oct;102(4):711-8. doi: 10.1160/TH09-04-243.	Proteomic and functional characterisation of platelet microparticle size classes.	Eukaryote	Homo sapiens	Ex vivo	Platelet	Normal donors	Preclearing (5000 g) > Ultracentrifugation (130,000 g) > Gel filtration	SCX-LC-ESI-MS/MS	449
55	37	198349080101	MV	19834908	Proteomics. 2009 Dec;9(24):5425-36. doi: 10.1002/pmic.200900338.	Gram-positive bacteria produce membrane vesicles: proteomics-based characterization of Staphylococcus aureus-derived membrane vesicles.	Prokaryote	Staphylococcus aureus	In vitro	Staphylococcus aureus ATCC14458	Normal	Preclearing (10000 g) > Filtration (0.45 ???m) > Concentration (100 kDa) > Filtation (0.22 ???m) > Ultracentrifugation (150,000 g) > Iodixanol density gradient ultracentrifugation (200,000 g)	1) 1DE-LC-ESI-MS/MS. 2) LC-ESI-MS/MS	90
56	38	198379820101	Both	19837982	Mol Cell Proteomics. 2010 Feb;9(2):197-208. doi: 10.1074/mcp.M900152-MCP200. Epub 2009 Oct 16.	Proteomics analysis of A33 immunoaffinity-purified exosomes released from the human colon tumor cell line LIM1215 reveals a tissue-specific protein signature.	Eukaryote	Homo sapiens	In vitro	Colorectal cancer cell (LIM1215)	Normal	Preclearing (400 g, 1900 g) > Filtration (0.1 ???m) > Concentration (5 kDa) > Ultracentrifugation (100,000 g)	1DE-LC-ESI-MS/MS	242
57	39	198379820102	#N/A	19837982	Mol Cell Proteomics. 2010 Feb;9(2):197-208. doi: 10.1074/mcp.M900152-MCP200. Epub 2009 Oct 16.	Proteomics analysis of A33 immunoaffinity-purified exosomes released from the human colon tumor cell line LIM1215 reveals a tissue-specific protein signature.	Eukaryote	Homo sapiens	In vitro	Colorectal cancer cell (LIM1215)	Normal_A33 affinity purified exosomes	Preclearing (400 g, 1900 g) > Concentration (5 kDa) > Affinity purification (A33)	1DE-LC-ESI-MS/MS	351
58	30	200316100101	lEV	20031610	Circ Cardiovasc Genet. 2009 Aug;2(4):379-88. doi: 10.1161/CIRCGENETICS.108.842849. Epub 2009 May 14.	Proteomics, metabolomics, and immunomics on microparticles derived from human atherosclerotic plaques.	Eukaryote	Homo sapiens	In vivo	Carotid atherosclerotic plaque	Patients of carotid atherosclerosis	Preclearing (400 g, 12,500 g) > Ultracentrifugation (20,500 g)	1DE-LC-ESI-MS/MS	152
59	40	201242230101	Both	20124223	Mol Cell Proteomics. 2010 Jun;9(6):1085-99. doi: 10.1074/mcp.M900381-MCP200. Epub 2010 Feb 1.	Hypoxic tumor cell modulates its microenvironment to enhance angiogenic and metastatic potential by secretion of proteins and exosomes.	Eukaryote	Homo sapiens	In vitro	Squamous carcinoma cell (A431)	Normal	Preclearing (500 g, 2000 g) > Filtration (0.22 ???m) > Ultracentrifugation (100,000 g)	LC-ESI-MS/MS	1439
60	41	201566410101	sEV	20156641	Thromb Res. 2010 Jun;125(6):e269-74. doi: 10.1016/j.thromres.2010.01.019. Epub 2010 Feb 13.	Proteomics of microparticles after deep venous thrombosis.	Eukaryote	Homo sapiens	In vivo	Plasma	Normal donors and patients of deep venous thrombosis	Preclearing (1500 g, 15,000 g) > Ultracentrifugation (200,000 g)	SCX-LC-MALDI-MS/MS	136
61	42	201599640101	sEV	20159964	J Cell Sci. 2010 Mar 15;123(Pt 6):842-52. doi: 10.1242/jcs.056465. Epub 2010 Feb 16.	An exosome-based secretion pathway is responsible for protein export from Leishmania and communication with macrophages.	Eukaryote	Leishmania donovani	In vitro	Leishmania donovani Sudan S2	37oC	Preclearing (300 g, 700 g, 15,000 g) > Ultracentrifugation (110,000 g)	LC-ESI-MS/MS	233
62	42	201599640102	sEV	20159964	J Cell Sci. 2010 Mar 15;123(Pt 6):842-52. doi: 10.1242/jcs.056465. Epub 2010 Feb 16.	An exosome-based secretion pathway is responsible for protein export from Leishmania and communication with macrophages.	Eukaryote	Leishmania donovani	In vitro	Leishmania donovani Sudan S2	26oC	Preclearing (300 g, 700 g, 15,000 g) > Ultracentrifugation (110,000 g)	LC-ESI-MS/MS	233
63	42	201599640103	sEV	20159964	J Cell Sci. 2010 Mar 15;123(Pt 6):842-52. doi: 10.1242/jcs.056465. Epub 2010 Feb 16.	An exosome-based secretion pathway is responsible for protein export from Leishmania and communication with macrophages.	Eukaryote	Leishmania donovani	In vitro	Leishmania donovani Sudan S2	pH 7.5	Preclearing (300 g, 700 g, 15,000 g) > Ultracentrifugation (110,000 g)	LC-ESI-MS/MS	175
64	42	201599640104	sEV	20159964	J Cell Sci. 2010 Mar 15;123(Pt 6):842-52. doi: 10.1242/jcs.056465. Epub 2010 Feb 16.	An exosome-based secretion pathway is responsible for protein export from Leishmania and communication with macrophages.	Eukaryote	Leishmania donovani	In vitro	Leishmania donovani Sudan S2	pH 5.5	Preclearing (300 g, 700 g, 15,000 g) > Ultracentrifugation (110,000 g)	LC-ESI-MS/MS	175
65	43	202241110101	sEV	20224111	Mol Cell Proteomics. 2010 Jun;9(6):1324-38. doi: 10.1074/mcp.M000063-MCP201. Epub 2010 Mar 11.	Proteomics analysis of bladder cancer exosomes.	Eukaryote	Homo sapiens	In vitro	Bladder cancer cell (HT1376)	Normal	Preclearing (400 g, 2000 g, 10,000 g) > Sucrose cushion ultracentrifugation (100,000 g) > Ultracentrifugation (118,000 g)	LC-ESI-MS/MS	345
66	44	204583370101	sEV	20458337	Immunol Cell Biol. 2010 Nov-Dec;88(8):851-6. doi: 10.1038/icb.2010.64. Epub 2010 May 11.	MHC class II-associated proteins in B-cell exosomes and potential functional implications for exosome biogenesis.	Eukaryote	Homo sapiens	In vitro	B cell (RN (HLA-DR15))	Normal	Preclearing (200 g, 500 g, 10,000 g) > Ultracentrifugation (70,000 g) > Sucrose density ultracentrifugation (190,000 g) > Affinity purification (MHC II)	1DE-LC-ESI-MS/MS	527
67	45	204846260101	sEV	20484626	J Neurosci. 2010 May 19;30(20):6838-51. doi: 10.1523/JNEUROSCI.5699-09.2010.	Cell-produced alpha-synuclein is secreted in a calcium-dependent manner by exosomes and impacts neuronal survival.	Eukaryote	Homo sapiens	In vitro	Neuroblastoma cell (SH-SY5Y)	Normal	Preclearing (300 g, 2000 g, 10,000 g) > Ultracentrifugation (100,000 g)	LC-ESI-MS/MS	164
68	46	205352380101	sEV	20535238	Proteomics Clin Appl. 2010 Apr;4(4):416-25. doi: 10.1002/prca.200900103.	Candidate biomarkers in exosome-like vesicles purified from rat and mouse urine samples.	Eukaryote	Rattus norvegicus	In vivo	Urine	Rats of liver injury	Preclearing (1500 g, 10,000 g) > Ultracentrifugation (100,000 g) > Sucrose/D2O cushion ultracentrifugation (100,000 g) > Ultracentrifugation (100,000 g)	1DE-LC-ESI-MS/MS	133
69	15	205594360101	sEV	20559436	PLoS One. 2010 Jun 14;5(6):e11113. doi: 10.1371/journal.pone.0011113.	Characterization of yeast extracellular vesicles: evidence for the participation of different pathways of cellular traffic in vesicle biogenesis.	Eukaryote	Saccharomyces cerevisiae	In vitro	Saccharomyces cerevisiae	Normal	Preclearing (4000 g, 15,000 g) > Concentration (100 kDa) > Preclearing (4000 g, 15,000 g) > Filtration (0.8 ???m) > Ultracentrifugation (100,000 g)	LC-ESI-MS/MS	400
70	47	206876140101	MV	20687614	J Proteome Res. 2010 Oct 1;9(10):5197-208. doi: 10.1021/pr1004983.	Profiling the outer membrane proteome during growth and development of the social bacterium Myxococcus xanthus by selective biotinylation and analyses of outer membrane vesicles.	Prokaryote	Myxococcus xanthus	In vitro	Myxococcus xanthus DK1622	Vegetative cell	Filtration (0.2 ???m) > Ultracentrifugation (150,000 g)	1DE-LC-MALDI-MS/MS	429
71	47	206876140102	MV	20687614	J Proteome Res. 2010 Oct 1;9(10):5197-208. doi: 10.1021/pr1004983.	Profiling the outer membrane proteome during growth and development of the social bacterium Myxococcus xanthus by selective biotinylation and analyses of outer membrane vesicles.	Prokaryote	Myxococcus xanthus	In vitro	Myxococcus xanthus DK1622	Developmental cell	Filtration (0.2 ???m) > Ultracentrifugation (150,000 g)	1DE-LC-MALDI-MS/MS	218
72	48	208811850101	sEV	20881185	J Immunol. 2010 Nov 1;185(9):5011-22. doi: 10.4049/jimmunol.1000541. Epub 2010 Sep 29.	Leishmania exosomes modulate innate and adaptive immune responses through effects on monocytes and dendritic cells.	Eukaryote	Leishmania donovani	In vitro	Leishmania donovani	Wild-type	Preclearing (300 g, 700 g, 15,000 g) > Filtration (0.2 ??m) > Concentration (100 kDa) > Ultracentrifugation (110,000 g)	LC-ESI-MS/MS	243
73	48	208811850102	sEV	20881185	J Immunol. 2010 Nov 1;185(9):5011-22. doi: 10.4049/jimmunol.1000541. Epub 2010 Sep 29.	Leishmania exosomes modulate innate and adaptive immune responses through effects on monocytes and dendritic cells.	Eukaryote	Leishmania donovani	In vitro	Leishmania donovani	HSP100 KO	Preclearing (300 g, 700 g, 15,000 g) > Filtration (0.2 ??m) > Concentration (100 kDa) > Ultracentrifugation (110,000 g)	LC-ESI-MS/MS	243
74	49	210493850101	Both	21049385	Semin Thromb Hemost. 2010 Nov;36(8):845-56. doi: 10.1055/s-0030-1267038. Epub 2010 Nov 3.	The plasma microparticle proteome.	Eukaryote	Homo sapiens	In vivo	Plasma	Normal donors	Preclearing (250 g, 1250 g) > Ultracentrifugation (100,000 g)	LC-ESI-MS/MS	125
75	50	211366420101	sEV	21136642	Proteomics Clin Appl. 2007 Nov;1(11):1446-61. doi: 10.1002/prca.200700522. Epub 2007 Oct 16.	Oligodendrocytes secrete exosomes containing major myelin and stress-protective proteins: Trophic support for axons?	Eukaryote	Mus musculus	In vitro	Oligodendrocyte	Normal	Preclearing (60 g, 10,000 g) > Ultracentrifugation (100,000 g) > Sucrose density gradient ultracentrifugation (100,000 g) > Ultracentrifugation (100,000 g)	LC-ESI-MS/MS	106
76	51	211369870101	MV	21136987	Proteomics Clin Appl. 2009 Jul;3(7):785-96. doi: 10.1002/prca.200800192. Epub 2009 Jun 25.	Proteomic and functional characterization of the outer membrane vesicles from the gastric pathogen Helicobacter pylori.	Prokaryote	Helicobacter pylori	In vitro	Helicobacter pylori J99	Normal	Preclearing (15,000 g) > Filtration (0.45 ???m) > Ammonium sulfate precipitation > Ultracentrifugation (100,000 g)	1DE-LC-ESI-MS/MS	86
77	51	211369870102	MV	21136987	Proteomics Clin Appl. 2009 Jul;3(7):785-96. doi: 10.1002/prca.200800192. Epub 2009 Jun 25.	Proteomic and functional characterization of the outer membrane vesicles from the gastric pathogen Helicobacter pylori.	Prokaryote	Helicobacter pylori	In vitro	Helicobacter pylori NCTC 11637	Normal	Preclearing (15,000 g) > Filtration (0.45 ???m) > Ammonium sulfate precipitation > Ultracentrifugation (100,000 g)	1DE-LC-ESI-MS/MS	61
78	52	211370180101	Both	21137018	Proteomics Clin Appl. 2010 Jan;4(1):84-96. doi: 10.1002/prca.200800093. Epub 2009 Nov 11.	Microfiltration isolation of human urinary exosomes for characterization by MS.	Eukaryote	Homo sapiens	In vivo	Urine	Normal	Preclearing (2500 g) > Filtration (0.1 ??m) > Concentration (10 kDa) > Ultracentrifugation (200,000 g)	LC-ESI-MS/MS	91
79	53	211382990101	MV	21138299	J Proteome Res. 2011 Mar 4;10(3):954-67. doi: 10.1021/pr1009756. Epub 2011 Feb 9.	Proteomic characterization and functional analysis of outer membrane vesicles of Francisella novicida suggests possible role in virulence and use as a vaccine.	Prokaryote	Francisella philomiragia	In vitro	Francisella philomiragia ATCC25015	Normal	Preclearing (6000 g) > Filtration (0.45 ???m, 0.22 ???m) > Ultracentrifugation (125,000 g)	1DE-LC-ESI-MS/MS	238
80	53	211382990102	MV	21138299	J Proteome Res. 2011 Mar 4;10(3):954-67. doi: 10.1021/pr1009756. Epub 2011 Feb 9.	Proteomic characterization and functional analysis of outer membrane vesicles of Francisella novicida suggests possible role in virulence and use as a vaccine.	Prokaryote	Francisella tularensis	In vitro	Francisella tularensis subsp. Novicida ATCC15482	Normal	Preclearing (6000 g) > Filtration (0.45 ???m, 0.22 ???m) > Ultracentrifugation (125,000 g)	1DE-LC-ESI-MS/MS	415
81	54	212767920101	sEV	21276792	Exp Cell Res. 2011 May 1;317(8):1192-202. doi: 10.1016/j.yexcr.2011.01.014. Epub 2011 Jan 26.	Morphologic and proteomic characterization of exosomes released by cultured extravillous trophoblast cells.	Eukaryote	Homo sapiens	In vitro	Trophoblast cell (Sw71)	Normal	Preclearing (400 g, 15,000 g) > Concentration (500 kDa) > Ultracentrifugation (100,000 g) > Sucrose density gradient ultracentrifugation (222,228 g) > Ultracentrifugation (105,000 g)	LC-ESI-MS/MS	218
82	55	213625030101	sEV	21362503	J Proteomics. 2011 May 16;74(6):796-804. doi: 10.1016/j.jprot.2011.02.024. Epub 2011 Mar 8.	Protein profile of exosomes from trabecular meshwork cells.	Eukaryote	Homo sapiens	Ex vivo	Tabecular meshwork cell	Normal	Preclearing (10,000 g) > Ultracentrifugation (100,000 g)	1DE-SCX-LC-ESI-MS/MS	607
83	56	213869680101	MV	21386968	PLoS One. 2011 Feb 28;6(2):e17027. doi: 10.1371/journal.pone.0017027.	Acinetobacter baumannii secretes cytotoxic outer membrane protein A via outer membrane vesicles.	Prokaryote	Acinetobacter baumannii	In vitro	Acinetobacter baumannii ATCC 19606T	Normal	Preclearing (6000 g) > Filtration (0.2 ???m) > Concentration (100 kDa) > Ultracentrifugation (150,000 g)	1DE-LC-ESI-MS/MS	113
84	57	214081150101	MV	21408115	PLoS One. 2011 Mar 8;6(3):e17629. doi: 10.1371/journal.pone.0017629.	Outer membrane vesicles as a candidate vaccine against edwardsiellosis.	Prokaryote	Edwardsiella tarda	In vitro	Edwardsiella tarda ED45	Normal	Preclearing (5000 g) > Filtration (0.45 ???m) > Concetration (100 kDa) > Filtration (0.2 ???m) > Ultracentrifugation (150,000 g) > Sucrose density gradient ultracentrifugation (200,000 g) > Ultracentrifugation (150,000 g)	1DE-LC-ESI-MS/MS	72
85	58	215154220101	#N/A	21515422	J Proteomics. 2011 Jun 10;74(7):1123-34. doi: 10.1016/j.jprot.2011.04.005. Epub 2011 Apr 15.	Proteomic characterization of biogenesis and functions of matrix vesicles released from mineralizing human osteoblast-like cells.	Eukaryote	Homo sapiens	In vitro	Osteosarcoma cell (Saos-2 ATCC HTB-85)	Normal	Preclearing (600 g, 20,000 g) > Ultracentrifugation (80,000 g)	1DE-LC-ESI-MS/MS	253
86	59	215950330101	sEV	21595033	Proteomics. 2011 Jun;11(12):2459-75. doi: 10.1002/pmic.201000443. Epub 2011 May 18.	Proteomic analysis of urinary exosomes from patients of early IgA nephropathy and thin basement membrane nephropathy.	Eukaryote	Homo sapiens	In vivo	Urine	Normal donors	Preclearing (17,000 g) > Ultracentrifugation (200,000 g) > Sucrose density gradient ultracentrifugation (270,000 g) > Ultracentrifugation (200,000 g)	1DE-LC-ESI-MS/MS	1010
87	59	215950330102	sEV	21595033	Proteomics. 2011 Jun;11(12):2459-75. doi: 10.1002/pmic.201000443. Epub 2011 May 18.	Proteomic analysis of urinary exosomes from patients of early IgA nephropathy and thin basement membrane nephropathy.	Eukaryote	Homo sapiens	In vivo	Urine	Patients of early IgA nephropathy	Preclearing (17,000 g) > Ultracentrifugation (200,000 g) > Sucrose density gradient ultracentrifugation (270,000 g) > Ultracentrifugation (200,000 g)	1DE-LC-ESI-MS/MS	312
88	59	215950330103	sEV	21595033	Proteomics. 2011 Jun;11(12):2459-75. doi: 10.1002/pmic.201000443. Epub 2011 May 18.	Proteomic analysis of urinary exosomes from patients of early IgA nephropathy and thin basement membrane nephropathy.	Eukaryote	Homo sapiens	In vivo	Urine	Patients of basement membrane nephropathy	Preclearing (17,000 g) > Ultracentrifugation (200,000 g) > Sucrose density gradient ultracentrifugation (270,000 g) > Ultracentrifugation (200,000 g)	1DE-LC-ESI-MS/MS	621
89	60	216304620101	Both	21630462	Proteomics. 2011 Jul;11(13):2745-51. doi: 10.1002/pmic.201100022. Epub 2011 Jun 1.	Proteomic analysis of microvesicles derived from human colorectal cancer ascites.	Eukaryote	Homo sapiens	In vivo	Ascites	Patients of colorectal cancer	Preclearing (3200 g) > Sucrose cushion ultracentrifugation (100,000 g) > Iodixanol density gradient ultracentrifugation (200,000 g) > Sucrose cushion ultracentrifugation (100,000 g) > Iodixanol density gradient ultracentrifugation (200,000 g)	1DE-LC-ESI-MS/MS	816
90	61	216359790101	lEV	21635979	J Proteomics. 2011 Sep 6;74(10):2025-33. doi: 10.1016/j.jprot.2011.05.023. Epub 2011 May 19.	Proteomic characterization of thymocyte-derived microvesicles and apoptotic bodies in BALB/c mice.	Eukaryote	Mus musculus	Ex vivo	Thymocyte	Normal	Preclearing (2000 g) > Filtration (0.8 ???m) > Ultracentrifugation (12,200 g)	LC-ESI-MS/MS	194
91	62	217513440101	MV	21751344	Proteomics. 2011 Aug;11(16):3424-9. doi: 10.1002/pmic.201000212.	Proteomic analysis of outer membrane vesicles derived from Pseudomonas aeruginosa.	Prokaryote	Pseudomonas aeruginosa	In vitro	Pseudomonas aeruginosa PAO1	Normal	Preclearing (6000 g) > Filtation (0.45 ???m) > Concentration (100 kDa) > Filtation (0.22 ???m) > Ultracentrifugation (150,000 g) > Iodixanol density gradient ultracentrifugation (200,000 g) > Ultracentrifugation (150,000 g)	LC-ESI-MS/MS	314
92	27	218280460101	sEV	21828046	J Biol Chem. 2011 Sep 30;286(39):34426-39. doi: 10.1074/jbc.M111.257444. Epub 2011 Aug 2.	Proteolipidic composition of exosomes changes during reticulocyte maturation.	Eukaryote	Rattus norvegicus	Ex vivo	Reticulocyte	Reticulocyte cultured for 36 h	Preclearing (20,000 g) > Ultracentrifugation (100,000 g)	1DE-LC-ESI-MS/MS	1178
93	27	218280460102	sEV	21828046	J Biol Chem. 2011 Sep 30;286(39):34426-39. doi: 10.1074/jbc.M111.257444. Epub 2011 Aug 2.	Proteolipidic composition of exosomes changes during reticulocyte maturation.	Eukaryote	Rattus norvegicus	Ex vivo	Reticulocyte	Reticulocyte cultured for 84 h	Preclearing (20,000 g) > Ultracentrifugation (100,000 g)	1DE-LC-ESI-MS/MS	1125
94	27	218280460103	sEV	21828046	J Biol Chem. 2011 Sep 30;286(39):34426-39. doi: 10.1074/jbc.M111.257444. Epub 2011 Aug 2.	Proteolipidic composition of exosomes changes during reticulocyte maturation.	Eukaryote	Rattus norvegicus	Ex vivo	Reticulocyte	Reticulocyte cultured for 156 h	Preclearing (20,000 g) > Ultracentrifugation (100,000 g)	1DE-LC-ESI-MS/MS	1126
95	63	219018330101	sEV	21901833	Proteomics. 2011 Nov;11(22):4397-410. doi: 10.1002/pmic.201000774. Epub 2011 Oct 17.	Proteomics analyses of microvesicles released by Drosophila Kc167 and S2 cells.	Eukaryote	Drosophila melanogaster	In vitro	Embryonic cell (Kc167)	Normal	Preclearing (5000 g, 10,000 g) > Sucrose cushion ultracentrifugation (100,000 g) > Sucrose density gradient ultracentrifugation (100,000 g) > Ultracentrifugation (100,000 g)	1DE-LC-ESI-MS/MS	161
96	63	219018330102	sEV	21901833	Proteomics. 2011 Nov;11(22):4397-410. doi: 10.1002/pmic.201000774. Epub 2011 Oct 17.	Proteomics analyses of microvesicles released by Drosophila Kc167 and S2 cells.	Eukaryote	Drosophila melanogaster	In vitro	Embryonic cell (S2)	Normal	Preclearing (5000 g, 10,000 g) > Sucrose cushion ultracentrifugation (100,000 g) > Sucrose density gradient ultracentrifugation (100,000 g) > Ultracentrifugation (100,000 g)	1DE-LC-ESI-MS/MS	228
97	64	220148500101	Both	22014850	Thromb Res. 2012 Jul;130(1):122-8. doi: 10.1016/j.thromres.2011.09.016. Epub 2011 Oct 19.	Proteomics of microparticles after experimental pulmonary embolism.	Eukaryote	Rattus norvegicus	In vivo	Plasma	Normal rat	Preclearing (1500 g, 5000 g) > Filtration (0.45 ???m) > Ultracentrifugation (200,000 g)	1DE-LC-ESI-MS/MS	180
98	64	220148500102	Both	22014850	Thromb Res. 2012 Jul;130(1):122-8. doi: 10.1016/j.thromres.2011.09.016. Epub 2011 Oct 19.	Proteomics of microparticles after experimental pulmonary embolism.	Eukaryote	Rattus norvegicus	In vivo	Plasma	Rat of pulmonary embolism model	Preclearing (1500 g, 5000 g) > Filtration (0.45 ???m) > Ultracentrifugation (200,000 g)	1DE-LC-ESI-MS/MS	164
99	65	220303510101	sEV	22030351	Mol Cell Proteomics. 2012 Feb;11(2):M111.012245. doi: 10.1074/mcp.M111.012245. Epub 2011 Oct 26.	Expression of PTRF in PC-3 Cells modulates cholesterol dynamics and the actin cytoskeleton impacting secretion pathways.	Eukaryote	Homo sapiens	In vitro	Prostate cancer cell (PC-3)	Normal	Preclearing (600 g, 10,000 g) > Ultracentrifugation (100,000 g)	LC-ESI-MS/MS	363
100	66	220463110101	sEV	22046311	PLoS One. 2011;6(10):e26588. doi: 10.1371/journal.pone.0026588. Epub 2011 Oct 26.	Exosomes from Plasmodium yoelii-infected reticulocytes protect mice from lethal infections.	Eukaryote	Mus musculus, Plasmodium yoelii	In vivo	Plasma	Plasmodium yoelii-infected	Preclearing (500 g, 15,000 g) > Ultracentrifugation (100,000 g) > Filtration (0.22 ??m) > Ultracentrifugation (100,000 g)	LC-ESI-MS/MS	285
101	3	221060710101	sEV	22106071	Proteomics. 2012 Jan;12(2):329-38. doi: 10.1002/pmic.201100477. Epub 2011 Dec 16.	Proteomic analysis of urine exosomes by multidimensional protein identification technology (MudPIT).	Eukaryote	Homo sapiens	In vivo	Urine	Normal donors	Preclearing (17,000 g) > Ultracentrifugation (200,000 g)	1) 1DE-LC-ESI-MS/MS. 2) SCX-LC-ESI-MS/MS	3270
102	33	221147300101	MV	22114730	PLoS One. 2011;6(11):e27958. doi: 10.1371/journal.pone.0027958. Epub 2011 Nov 16.	Staphylococcus aureus produces membrane-derived vesicles that induce host cell death.	Prokaryote	Staphylococcus aureus	In vitro	Staphylococcus aureus 06ST1048	Normal	Preclearing (6000 g) > Filtration (0.2 ???m) > Concentration (100 kDa) > Ultracentrifugation (150,000 g) > Sucrose density gradient ultracentrifugation (200,000 g) > Ultracentrifugation (150,000 g)	1DE-LC-ESI-MS/MS	143
103	67	221295870101	sEV	22129587	J Proteomics. 2012 Feb 16;75(5):1486-92. doi: 10.1016/j.jprot.2011.11.017. Epub 2011 Nov 23.	Bovine milk exosome proteome.	Eukaryote	Bos taurus	In vivo	Milk	Normal cow	Preclearing (10,000 g) > Ultracentrifugation (100,000 g) > Sucrose cushion ultracentrifugation (200,000 g)> Sucrose density gradient ultracentrifugation (112,700 g) > Ultracentrifugation (200,000 g)	LC-ESI-MS/MS	2052
104	68	221488760101	Both	22148876	J Proteome Res. 2012 Feb 3;11(2):839-49. doi: 10.1021/pr200682z. Epub 2011 Dec 28.	Proteomic analysis of microvesicles derived from human mesenchymal stem cells.	Eukaryote	Homo sapiens	Ex vivo	Mesenchymal stem cell	Normal	Preclearing (500 g, 800 g) > Concentration (100 kDa) > Sucrose cushion ultracentrifugation (100,000 g) > Iodixanol density gradient ultracentrifugation (150,000 g)	1DE-LC-ESI-MS/MS	720
105	14	221491700101	Both	22149170	J Proteome Res. 2012 Feb 3;11(2):1144-51. doi: 10.1021/pr200842h. Epub 2012 Jan 9.	The protein interaction network of extracellular vesicles derived from human colorectal cancer cells.	Eukaryote	Homo sapiens	In vitro	Colorectal cancer cell (HT29)	Normal	Preclearing (500 g, 800 g) > Concentration (100 kDa) > Sucrose cushion ultracentrifugation (100,000 g) > Sucrose density gradient ultracentrifugation (150,000 g)	1DE-LC-ESI-MS/MS	1331
106	69	222855930101	Both	22285593	Methods. 2012 Feb;56(2):293-304. doi: 10.1016/j.ymeth.2012.01.002. Epub 2012 Jan 21.	Comparison of ultracentrifugation, density gradient separation, and immunoaffinity capture methods for isolating human colon cancer cell line LIM1863-derived exosomes.	Eukaryote	Homo sapiens	In vitro	Colorectal cancer cell (LIM1863)	Normal_Pelleting based protocol	Preclearing (480 g, 2000 g) > Filtration (0.1 ???m) > Concentration (5 kDa) > Ultracentrifugation (100,000 g)	1DE-LC-ESI-MS/MS	658
107	70	222855930102	Both	22285593	Methods. 2012 Feb;56(2):293-304. doi: 10.1016/j.ymeth.2012.01.002. Epub 2012 Jan 21.	Comparison of ultracentrifugation, density gradient separation, and immunoaffinity capture methods for isolating human colon cancer cell line LIM1863-derived exosomes.	Eukaryote	Homo sapiens	In vitro	Colorectal cancer cell (LIM1863)	Normal_Density gradient ultracentrifufation based protocol	Preclearing (480 g, 2000 g) > Filtration (0.1 ???m) > Concentration (5 kDa) > Iodixanol density gradient ultracentrifugation (40%, 20%, 10%, 5%, 100,000 g) > Ultracentrifugation (100,000 g)	1DE-LC-ESI-MS/MS	533
108	71	222855930103	Both	22285593	Methods. 2012 Feb;56(2):293-304. doi: 10.1016/j.ymeth.2012.01.002. Epub 2012 Jan 21.	Comparison of ultracentrifugation, density gradient separation, and immunoaffinity capture methods for isolating human colon cancer cell line LIM1863-derived exosomes.	Eukaryote	Homo sapiens	In vitro	Colorectal cancer cell (LIM1863)	Normal_EpCAM affinity purification based protocol	Preclearing (480 g, 2000 g) > Filtration (0.1 ???m) > Concentration (5 kDa) > Immuno-affinity purification (EpCAM)	1DE-LC-ESI-MS/MS	550
109	72	222884200101	sEV	22288420	J Proteome Res. 2012 Mar 2;11(3):1676-85. doi: 10.1021/pr200872s. Epub 2012 Feb 14.	Vesicle and vesicle-free extracellular proteome of Paracoccidioides brasiliensis: comparative analysis with other pathogenic fungi.	Eukaryote	Paracoccidioides brasiliensis	In vitro	Paracoccidioides brasiliensis Pb18	Normal	Preclearing (4000 g, 15,000 g) > Concentration (100 kDa) > Preclearing (15,000 g) > Ultracentrifugation (100,000 g)	LC-ESI-MS/MS	205
110	73	223294220101	lEV	22329422	J Proteome Res. 2012 Apr 6;11(4):2154-63. doi: 10.1021/pr200901p. Epub 2012 Mar 1.	Quantitative proteome profiling of normal human circulating microparticles.	Eukaryote	Homo sapiens	Ex vivo	Platelet-poor plasma	Normal	Pelleting (18,890 g)	LC-ESI-MS/MS	467
111	74	223455100101	lEV	22345510	Mol Cell Proteomics. 2012 Aug;11(8):230-43. doi: 10.1074/mcp.M111.012732. Epub 2012 Feb 19.	Characterization of membrane-shed microvesicles from cytokine-stimulated ??-cells using proteomics strategies.	Eukaryote	Rattus norvegicus	In vitro	Insulinoma cell (NHI 6F Tu28)	Microparticle	Preclearing (1500 g, 3200 g) > Ultracentrifugation (20,000 g)	LC-ESI-MS/MS	401
112	75	223455100102	sEV	22345510	Mol Cell Proteomics. 2012 Aug;11(8):230-43. doi: 10.1074/mcp.M111.012732. Epub 2012 Feb 19.	Characterization of membrane-shed microvesicles from cytokine-stimulated ??-cells using proteomics strategies.	Eukaryote	Rattus norvegicus	In vitro	Insulinoma cell (NHI 6F Tu28)	Exosome	Preclearing (1500 g, 3200 g, 20,000 g) > Ultracentrifugation (100,000 g)	LC-ESI-MS/MS	191
113	76	223679510101	MV	22367951	J Microbiol. 2012 Feb;50(1):155-60. doi: 10.1007/s12275-012-1589-4. Epub 2012 Feb 27.	Acinetobacter baumannii outer membrane protein A modulates the biogenesis of outer membrane vesicles.	Prokaryote	Acinetobacter baumannii	In vitro	Acinetobacter baumannii ATCC 19606	OmpA KO	Preclearing (6000 g) > Filtration (0.2 ??m) > Concentration (500 kDa) > Ultracentrifugation (150,000 g)	1DE-LC-ESI-MS/MS	102
114	77	224189800101	sEV	22418980	Kidney Int. 2012 Jun;81(12):1263-72. doi: 10.1038/ki.2012.25. Epub 2012 Mar 14.	A multiplex quantitative proteomics strategy for protein biomarker studies in urinary exosomes.	Eukaryote	Homo sapiens	In vivo	Urine	Normal_low density	Preclearing (400 g, 800 g, 15,000 g) > Ultracentrifugation (200,000 g) > Sucrose cushion ultracentrifugation (110,000 g) > Ultracentrifugation (110,000 g)	1DE-LC-ESI-MS/MS	370
115	77	224189800102	sEV	22418980	Kidney Int. 2012 Jun;81(12):1263-72. doi: 10.1038/ki.2012.25. Epub 2012 Mar 14.	A multiplex quantitative proteomics strategy for protein biomarker studies in urinary exosomes.	Eukaryote	Homo sapiens	In vivo	Urine	Normal_high density	Preclearing (400 g, 800 g, 15,000 g) > Ultracentrifugation (200,000 g) > Sucrose cushion ultracentrifugation (110,000 g) > Ultracentrifugation (110,000 g)	1DE-LC-ESI-MS/MS	79
116	56	224287790101	MV	22428779	FEMS Microbiol Lett. 2012 Jun;331(1):17-24. doi: 10.1111/j.1574-6968.2012.02549.x. Epub 2012 Apr 13.	Klebsiella pneumoniae secretes outer membrane vesicles that induce the innate immune response.	Prokaryote	Klebsiella pneumoniae	In vitro	Klebsiella pneumoniae ATCC 13883	Normal	Preclearing (6000 g) > Filtration (0.2 ???m) > Concentration (100 kDa) > Ultracentrifugation (150,000 g)	1DE-LC-ESI-MS/MS	159
117	78	224378260101	sEV	22437826	J Biol Chem. 2012 May 11;287(20):16820-34. doi: 10.1074/jbc.M112.342667. Epub 2012 Mar 21.	Mechanism of evenness interrupted (Evi)-exosome release at synaptic boutons.	Eukaryote	Drosophila melanogaster	In vitro	Synaptic bouton (S2)	Normal	Preclearing (300 g, 2000 g, 10,000 g) > Ultracentrifugation (100,000 g) > Sucrose cushion ultracentrifugation (100,000 g) > Ultracentrifugation (100,000 g)	1DE-LC-ESI-MS/MS	159
118	79	224445740101	lEV	22444574	Anal Chim Acta. 2012 Apr 20;723:61-7. doi: 10.1016/j.aca.2012.02.018. Epub 2012 Feb 19.	Proteomic analysis of microvesicles in human saliva by gel electrophoresis with liquid chromatography-mass spectrometry.	Eukaryote	Homo sapiens	In vivo	Saliva	Normal donors	Preclearing (2600 g) > Filtration (5 ???m) > Ultracentrifugation (20,000 g)	1DE-LC-ESI-MS/MS	56
119	80	224481330101	MV	22448133	ScientificWorldJournal. 2012;2012:402919. doi: 10.1100/2012/402919. Epub 2012 Feb 14.	Vesiculation from Pseudomonas aeruginosa under SOS.	Prokaryote	Pseudomonas aeruginosa	In vitro	Pseudomonas aeruginosa PAO1	Normal	Preclearing (12,000 g) > Filtration (0.2 ???m) > Ultracentrifugation (100,000 g)	1DE-LC-ESI-MS/MS	105
120	80	224481330102	MV	22448133	ScientificWorldJournal. 2012;2012:402919. doi: 10.1100/2012/402919. Epub 2012 Feb 14.	Vesiculation from Pseudomonas aeruginosa under SOS.	Prokaryote	Pseudomonas aeruginosa	In vitro	Pseudomonas aeruginosa PAO1	??lexAN	Preclearing (12,000 g) > Filtration (0.2 ???m) > Ultracentrifugation (100,000 g)	1DE-LC-ESI-MS/MS	71
121	81	224575340101	sEV	22457534	Mol Cell Proteomics. 2012 Jul;11(7):M111.012914. doi: 10.1074/mcp.M111.012914. Epub 2012 Mar 28.	Proteomic analysis of microvesicles released by the human prostate cancer cell line PC-3.	Eukaryote	Homo sapiens	In vitro	Prostate cancer cell (PC-3)	Normal	Preclearing (400 g, 10,000 g) > Ultracentrifugation (100,000 g)	1DE-LC-ESI-MS/MS	266
122	82	225164330101	sEV	22516433	J Proteomics. 2012 Jun 27;75(12):3574-84. doi: 10.1016/j.jprot.2012.03.054. Epub 2012 Apr 10.	Proteomic analysis of microvesicles from plasma of healthy donors reveals high individual variability.	Eukaryote	Homo sapiens	In vivo	Plasma	Normal	Preclearing (2000 g, 12,000 g) > Ultracentrifugation (110,000 g) > Filtration (0.22 ??m) > Ultracentrifugation (100,000 g)	LC-ESI-MS/MS	168
123	83	226350050101	sEV	22635005	Nat Med. 2012 Jun;18(6):883-91. doi: 10.1038/nm.2753.	Melanoma exosomes educate bone marrow progenitor cells toward a pro-metastatic phenotype through MET.	Eukaryote	Homo sapiens	In vitro	Melanoma cell (B16-F10, SK-MEL-202, SK-MEL035, SK-MEL-265)	Normal	Preclearing (500 g, 20,000 g) > Ultracentrifugation (100,000 g)	LC-ESI-MS/MS	99
124	3	226416130101	sEV	22641613	J Proteomics. 2012 Jun 27;75(12):3574-84. doi: 10.1016/j.jprot.2012.03.054. Epub 2012 Apr 10.	Proteomic analysis of microvesicles from plasma of healthy donors reveals high individual variability.	Eukaryote	Homo sapiens	In vivo	Urine	Tubular injury	Preclearing (17,000 g) > Ultracentrifugation (200,000 g)	1DE-LC-ESI-MS/MS	1239
125	3	226416130102	sEV	22641613	J Proteomics. 2012 Jun 27;75(12):3574-84. doi: 10.1016/j.jprot.2012.03.054. Epub 2012 Apr 10.	Proteomic analysis of microvesicles from plasma of healthy donors reveals high individual variability.	Eukaryote	Homo sapiens	In vivo	Urine	Cell-mediated rejection	Preclearing (17,000 g) > Ultracentrifugation (200,000 g)	1DE-LC-ESI-MS/MS	1133
126	3	226416130103	sEV	22641613	J Proteomics. 2012 Jun 27;75(12):3574-84. doi: 10.1016/j.jprot.2012.03.054. Epub 2012 Apr 10.	Proteomic analysis of microvesicles from plasma of healthy donors reveals high individual variability.	Eukaryote	Homo sapiens	In vivo	Urine	Antibody-mediated rejection	Preclearing (17,000 g) > Ultracentrifugation (200,000 g)	1DE-LC-ESI-MS/MS	953
127	3	226416130104	sEV	22641613	J Proteomics. 2012 Jun 27;75(12):3574-84. doi: 10.1016/j.jprot.2012.03.054. Epub 2012 Apr 10.	Proteomic analysis of microvesicles from plasma of healthy donors reveals high individual variability.	Eukaryote	Homo sapiens	In vivo	Urine	Non-specific findings	Preclearing (17,000 g) > Ultracentrifugation (200,000 g)	1DE-LC-ESI-MS/MS	294
128	84	226690770101	#N/A	22669077	J Proteomics. 2012 Dec 5;76 Spec No.:203-10. doi: 10.1016/j.jprot.2012.05.031. Epub 2012 Jun 2.	The proteome of erythrocyte-derived microparticles from plasma: new clues for erythrocyte aging and vesiculation.	Eukaryote	Homo sapiens	In vivo	Blood	Normal	Preclearing (1550 g) > Ultracentrifugation (40,000 g)	1DE-LC-ESI-MS/MS	169
129	85	227118940101	Both	22711894	J Immunol. 2012 Jul 15;189(2):744-54. doi: 10.4049/jimmunol.1102244. Epub 2012 Jun 18.	Biochemical and biologic characterization of exosomes and microvesicles as facilitators of HIV-1 infection in macrophages.	Eukaryote	Homo sapiens	Ex vivo	Macrophage	HIV-1-infected_Microvesicle	Preclearing (500 g, 30 min) > Filtration (0.45 um, 0.22 um) > Sucrose cushion (100,000 g, 1 hr) > Affinity purification (anti-HLA-DR)	LC-ESI-MS/MS	64
130	86	227118940102	Both	22711894	J Immunol. 2012 Jul 15;189(2):744-54. doi: 10.4049/jimmunol.1102244. Epub 2012 Jun 18.	Biochemical and biologic characterization of exosomes and microvesicles as facilitators of HIV-1 infection in macrophages.	Eukaryote	Homo sapiens	Ex vivo	Macrophage	HIV-1-infected_Exosome	Preclearing (500 g, 30 min) > Filtration (0.45 um, 0.22 um) > Sucrose cushion (100,000 g, 1 hr) > Affinity purification (antibodies against CHMP4a, Tsg101, Myo II, Rab 11, and Vinc/Tal)	LC-ESI-MS/MS	203
131	87	227404760101	Both	22740476	Electrophoresis. 2012 Jul;33(12):1873-80. doi: 10.1002/elps.201100687.	Restoration of full-length APC protein in SW480 colon cancer cells induces exosome-mediated secretion of DKK-4.	Eukaryote	Homo sapiens	In vitro	Colon cacinoma cell (SW480)	Normal	Preclearing (1900 g) > Filtration (0.1 ???m) > Concentration (5 kDa) > Ultracentrifugation (100,000 g)	1DE-LC-ESI-MS/MS	113
132	88	228074560101	sEV	22807456	Proteomics. 2012 Jul;12(13):2203-11. doi: 10.1002/pmic.201100376.	Quantitative proteomic analysis of exosomes from HIV-1-infected lymphocytic cells.	Eukaryote	Homo sapiens	In vitro	Human T lymphoma cell (H9)	Uninfected	Preclearing (300 g, 10 min) > Preclearing (2000 g, 20 min) > Preclearing (10,000 g, 30 min) > Ultracentrifugation (100,000 g, 70 min)	1DE-LC-ESI-MS/MS	222
133	88	228074560102	sEV	22807456	Proteomics. 2012 Jul;12(13):2203-11. doi: 10.1002/pmic.201100376.	Quantitative proteomic analysis of exosomes from HIV-1-infected lymphocytic cells.	Eukaryote	Homo sapiens	In vitro	Human T lymphoma cell (H9)	HIV-1-infected	Preclearing (300 g, 10 min) > Preclearing (2000 g, 20 min) > Preclearing (10,000 g, 30 min) > Ultracentrifugation (100,000 g, 70 min)	1DE-LC-ESI-MS/MS	222
134	89	228080010101	Both	22808001	PLoS One. 2012;7(7):e37279. doi: 10.1371/journal.pone.0037279. Epub 2012 Jul 12.	Biochemical and physical characterisation of urinary nanovesicles following CHAPS treatment.	Eukaryote	Homo sapiens	In vivo	Urine	DTT-treated	Preclearing (1000 g) > Concentration > Ultracentrifugation (18,000 g) > Ultracentrifugation (200,000 g)	LC-ESI-MS/MS	275
135	89	228080010102	Both	22808001	PLoS One. 2012;7(7):e37279. doi: 10.1371/journal.pone.0037279. Epub 2012 Jul 12.	Biochemical and physical characterisation of urinary nanovesicles following CHAPS treatment.	Eukaryote	Homo sapiens	In vivo	Urine	CHAPS-treated	Preclearing (1000 g) > Concentration > Ultracentrifugation (18,000 g) > Ultracentrifugation (200,000 g)	LC-ESI-MS/MS	231
136	90	228487020101	#N/A	22848702	PLoS One. 2012;7(7):e42064. doi: 10.1371/journal.pone.0042064. Epub 2012 Jul 27.	Medulloblastoma exosome proteomics yield functional roles for extracellular vesicles.	Eukaryote	Homo sapiens	In vitro	Medulloblastoma cell (D283MED)	Normal	Filtration (0.22 ???m) > Concentration (100 kDa) > Ultracentrifugation (100,000 g)	1DE-LC-ESI-MS/MS	140
137	91	228520840101	#N/A	22852084	Int J Proteomics. 2012;2012:971907. doi: 10.1155/2012/971907. Epub 2012 Jul 18.	Proteolytic Potential of the MSC Exosome Proteome: Implications for an Exosome-Mediated Delivery of Therapeutic Proteasome.	Eukaryote	Homo sapiens	In vitro	Embryonic stem cell derived mesenchymal stem cell	Normal	Concentration (100 kDa) > HPLC > Concentration (100 kDa) > Filtration (0.22 ??m)	LC-ESI-MS/MS	761
138	92	229093040101	MV	22909304	J Proteome Res. 2012 Oct 5;11(10):4906-15. doi: 10.1021/pr300395j. Epub 2012 Sep 26.	Identification of proteins associated with the Pseudomonas aeruginosa biofilm extracellular matrix.	Prokaryote	Pseudomonas aeruginosa	In vitro	Pseudomonas aeruginosa PAO1	Normal_biofilm	Preclearing (15,000 g) > Filtration (0.2 ???m) > Ultracentrifugation (150,000 g) > Iodixanol density gradient ultracentrifugation (100,000 g)	1DE-LC-ESI-MS/MS	76
139	92	229093040102	MV	22909304	J Proteome Res. 2012 Oct 5;11(10):4906-15. doi: 10.1021/pr300395j. Epub 2012 Sep 26.	Identification of proteins associated with the Pseudomonas aeruginosa biofilm extracellular matrix.	Prokaryote	Pseudomonas aeruginosa	In vitro	Pseudomonas aeruginosa PAO1	Normal_planktonic culture	Preclearing (15,000 g) > Filtration (0.2 ???m) > Ultracentrifugation (150,000 g) > Iodixanol density gradient ultracentrifugation (100,000 g)	1DE-LC-ESI-MS/MS	193
140	93	229660470101	MV	22966047	Infect Immun. 2012 Dec;80(12):4089-98. doi: 10.1128/IAI.00161-12. Epub 2012 Sep 10.	Campylobacter jejuni outer membrane vesicles play an important role in bacterial interactions with human intestinal epithelial cells.	Prokaryote	Campylobacter jejuni	In vitro	Campylobacter jejuni 11168H	Normal	Preclearing (10,000 g) > Filtration (0.22 ??m) > Concetration (10 kDa) > Ultracentrifugation (150,000 g)	LC-ESI-MS/MS	151
141	94	229668050101	MV	22966805	J Proteome Res. 2012 Dec 7;11(12):5678-94. doi: 10.1021/pr300496c. Epub 2012 Oct 31.	Extracellular proteome of a highly invasive multidrug-resistant clinical strain of Acinetobacter baumannii.	Prokaryote	Acinetobacter baumannii	In vitro	Acinetobacter baumannii AbH12O-A2	Normal	Preclearing (2800 g) > Filtration (0.22 ???m) > Ultracentrifugation (200,000 g)	1) 1DE-LC-MALDI-MS/MS, 2) LC-MALDI-MS/MS	175
142	95	230005920101	lEV	23000592	J Proteomics. 2012 Dec 21;77:344-56. doi: 10.1016/j.jprot.2012.09.008. Epub 2012 Sep 20.	In-depth analysis of the secretome identifies three major independent secretory pathways in differentiating human myoblasts.	Eukaryote	Homo sapiens	In vitro	Neonatal myoblast cell	Patient of developmental heart defect_microparticle	Preclearing (300 g, 2000 g) > Ultracentrifugation (20,000 g)	LC-ESI-MS/MS	763
143	96	230005920102	sEV	23000592	J Proteomics. 2012 Dec 21;77:344-56. doi: 10.1016/j.jprot.2012.09.008. Epub 2012 Sep 20.	In-depth analysis of the secretome identifies three major independent secretory pathways in differentiating human myoblasts.	Eukaryote	Homo sapiens	In vitro	Neonatal myoblast cell	Patient of developmental heart defect_exosome	Preclearing (300 g, 2000 g, 20,000 g) > Ultracentrifugation (100,000 g)	LC-ESI-MS/MS	561
144	97	230293460101	sEV	23029346	PLoS One. 2012;7(9):e45974. doi: 10.1371/journal.pone.0045974. Epub 2012 Sep 24.	Extracellular vesicles from parasitic helminths contain specific excretory/secretory proteins and are internalized in intestinal host cells.	Eukaryote	Echinostoma caproni	In vitro	Echinostoma caproni from ICR mice	Normal	Preclearing (300 g, 700 g, 15,000 g) > Ultracentrifugation (120,000 g)	LC-ESI-MS/MS	92
145	97	230293460102	sEV	23029346	PLoS One. 2012;7(9):e45974. doi: 10.1371/journal.pone.0045974. Epub 2012 Sep 24.	Extracellular vesicles from parasitic helminths contain specific excretory/secretory proteins and are internalized in intestinal host cells.	Eukaryote	Fasciola hepatica	In vitro	Fasciola hepatica from cow liver	Normal	Preclearing (300 g, 700 g, 15,000 g) > Ultracentrifugation (120,000 g)	LC-ESI-MS/MS	68
146	98	230356430101	sEV	23035643	Traffic. 2013 Jan;14(1):82-96. doi: 10.1111/tra.12016. Epub 2012 Oct 31.	Drosophila S2 cells secrete wingless on exosome-like vesicles but the wingless gradient forms independently of exosomes.	Eukaryote	Drosophila	In vitro	Drosophila S2 tub-Wg	Normal	Preclearing (300 g, 2500 g, 10,000 g) > Ultracentrifugation (100,000 g)	LC-ESI-MS/MS	177
147	99	230439090101	MV	23043909	Biochim Biophys Acta. 2013 Jan;1834(1):231-9. doi: 10.1016/j.bbapap.2012.09.015. Epub 2012 Oct 5.	Virulence factors are released in association with outer membrane vesicles of Pseudomonas syringae pv. tomato T1 during normal growth.	Prokaryote	Pseudomonas syringae	In vitro	Pseudomonas syringae pv tomato T1	Normal	Preclearing (6500 g) > Filtration (0.45 ???m, 0.22 ???m) > Ultracentrifugation (150,000 g)	1DE-LC-ESI-MS/MS	139
148	100	230564670101	lEV	23056467	PLoS One. 2012;7(10):e46822. doi: 10.1371/journal.pone.0046822. Epub 2012 Oct 8.	Cause or effect of arteriogenesis: compositional alterations of microparticles from CAD patients undergoing external counterpulsation therapy.	Eukaryote	Homo sapiens	In vivo	Blood	Patients of external counterpulsation therapy	Preclearing (1550 g) > Ultracentrifugation (19,000 g)	1DE-LC-ESI-MS/MS	1004
149	101	230827780101	sEV	23082778	J Proteome Res. 2012 Dec 7;11(12):5611-29. doi: 10.1021/pr3008732. Epub 2012 Oct 31.	Comparative and targeted proteomic analyses of urinary microparticles from bladder cancer and hernia patients.	Eukaryote	Homo sapiens	In vivo	Urine	Patients of bladder cancer	Preclearing (17,000 g) > Ultracentrifugation (100,000 g)	LC-ESI-MS/MS	529
150	101	230827780102	sEV	23082778	J Proteome Res. 2012 Dec 7;11(12):5611-29. doi: 10.1021/pr3008732. Epub 2012 Oct 31.	Comparative and targeted proteomic analyses of urinary microparticles from bladder cancer and hernia patients.	Eukaryote	Homo sapiens	In vivo	Urine	Patients of hernia	Preclearing (17,000 g) > Ultracentrifugation (100,000 g)	LC-ESI-MS/MS	480
151	102	231615130101	Both	23161513	Mol Cell Proteomics. 2013 Feb;12(2):343-55. doi: 10.1074/mcp.M112.022806. Epub 2012 Nov 15.	Proteomic analysis of exosomes from mutant KRAS colon cancer cells identifies intercellular transfer of mutant KRAS.	Eukaryote	Homo sapiens	In vitro	Colon cancer cell (DKs-8)	Normal	Preclearing (300 g) > Filtration (0.22 ???m) > Concentration (100 kDa) > Ultracentrifugation (150,000 g)	IEF-LC-ESI-MS/MS	1742
152	102	231615130102	Both	23161513	Mol Cell Proteomics. 2013 Feb;12(2):343-55. doi: 10.1074/mcp.M112.022806. Epub 2012 Nov 15.	Proteomic analysis of exosomes from mutant KRAS colon cancer cells identifies intercellular transfer of mutant KRAS.	Eukaryote	Homo sapiens	In vitro	Colon cancer cell (DLD-1)	Normal	Preclearing (300 g) > Filtration (0.22 ???m) > Concentration (100 kDa) > Ultracentrifugation (150,000 g)	IEF-LC-ESI-MS/MS	1728
153	102	231615130103	Both	23161513	Mol Cell Proteomics. 2013 Feb;12(2):343-55. doi: 10.1074/mcp.M112.022806. Epub 2012 Nov 15.	Proteomic analysis of exosomes from mutant KRAS colon cancer cells identifies intercellular transfer of mutant KRAS.	Eukaryote	Homo sapiens	In vitro	Colon cancer cell (DKO-1)	Normal	Preclearing (300 g) > Filtration (0.22 ???m) > Concentration (100 kDa) > Ultracentrifugation (150,000 g)	IEF-LC-ESI-MS/MS	1701
154	103	231854180101	lEV	23185418	PLoS One. 2012;7(11):e49726. doi: 10.1371/journal.pone.0049726. Epub 2012 Nov 20.	Improved flow cytometric assessment reveals distinct microvesicle (cell-derived microparticle) signatures in joint diseases.	Eukaryote	Homo sapiens	In vivo	Synovial fluid	Rheumatoid arthritis (RA)	Filtration (800 nm) > Ultracentrifugation (20,500 g)	LC-ESI-MS/MS	101
155	103	231854180102	lEV	23185418	PLoS One. 2012;7(11):e49726. doi: 10.1371/journal.pone.0049726. Epub 2012 Nov 20.	Improved flow cytometric assessment reveals distinct microvesicle (cell-derived microparticle) signatures in joint diseases.	Eukaryote	Homo sapiens	In vivo	Synovial fluid	Osteoarthritis (OA)	Filtration (800 nm) > Ultracentrifugation (20,500 g)	LC-ESI-MS/MS	109
156	103	231854180103	lEV	23185418	PLoS One. 2012;7(11):e49726. doi: 10.1371/journal.pone.0049726. Epub 2012 Nov 20.	Improved flow cytometric assessment reveals distinct microvesicle (cell-derived microparticle) signatures in joint diseases.	Eukaryote	Homo sapiens	In vivo	Synovial fluid	Juvenile idiopathic arthritis (JIA)	Filtration (800 nm) > Ultracentrifugation (20,500 g)	LC-ESI-MS/MS	92
157	104	232149140101	Both	23214914	J Proteome Res. 2013 Feb 1;12(2):883-97. doi: 10.1021/pr300947g. Epub 2013 Jan 4.	Proteomic analysis of Trypanosoma cruzi secretome: characterization of two populations of extracellular vesicles and soluble proteins.	Eukaryote	Trypanosoma cruzi	In vitro	Epimastigotes	Normal_larger vesicles	Preclearing (3000 g) > Filtration (0.45 ???m) > Ultracentrifugation (100,000 g)	SCX-LC-ESI-MS/MS	141
158	104	232149140102	Both	23214914	J Proteome Res. 2013 Feb 1;12(2):883-97. doi: 10.1021/pr300947g. Epub 2013 Jan 4.	Proteomic analysis of Trypanosoma cruzi secretome: characterization of two populations of extracellular vesicles and soluble proteins.	Eukaryote	Trypanosoma cruzi	In vitro	Epimastigotes	Normal_smaller vesicles	Preclearing (3000 g) > Filtration (0.45 ???m) > Ultracentrifugation (100,000 g)	SCX-LC-ESI-MS/MS	141
159	104	232149140103	Both	23214914	J Proteome Res. 2013 Feb 1;12(2):883-97. doi: 10.1021/pr300947g. Epub 2013 Jan 4.	Proteomic analysis of Trypanosoma cruzi secretome: characterization of two populations of extracellular vesicles and soluble proteins.	Eukaryote	Trypanosoma cruzi	In vitro	Metacyclic trypomastigotes	Normal_larger vesicles	Preclearing (3000 g) > Filtration (0.45 ???m) > Ultracentrifugation (100,000 g)	SCX-LC-ESI-MS/MS	80
160	105	232302780101	lEV	23230278	Mol Cell Proteomics. 2013 Mar;12(3):587-98. doi: 10.1074/mcp.M112.021303. Epub 2012 Dec 10.	Two distinct populations of exosomes are released from LIM1863 colon carcinoma cell-derived organoids.	Eukaryote	Homo sapiens	In vitro	Colon cancer cell (LIM1863)	Normal_shed vesicles	Preclearing (480 g, 2000 g) > Ultracentrifugation (10,000 g)	1DE-LC-ESI-MS/MS	1276
161	106	232302780102	lEV	23230278	Mol Cell Proteomics. 2013 Mar;12(3):587-98. doi: 10.1074/mcp.M112.021303. Epub 2012 Dec 10.	Two distinct populations of exosomes are released from LIM1863 colon carcinoma cell-derived organoids.	Eukaryote	Homo sapiens	In vitro	Colon cancer cell (LIM1863)	Normal_A33 affinity purified exosomes	Preclearing (480 g, 2000 g) > Ultracentrifugation (10,000 g) > Filtration (0.1 ???m) > Concentration (5 kDa) > Affinity purification (A33)	1DE-LC-ESI-MS/MS	945
162	107	232302780103	lEV	23230278	Mol Cell Proteomics. 2013 Mar;12(3):587-98. doi: 10.1074/mcp.M112.021303. Epub 2012 Dec 10.	Two distinct populations of exosomes are released from LIM1863 colon carcinoma cell-derived organoids.	Eukaryote	Homo sapiens	In vitro	Colon cancer cell (LIM1863)	Normal_EpCAM affinity purified exosomes	Preclearing (480 g, 2000 g) > Ultracentrifugation (10,000 g) > Filtration (0.1 ???m) > Concentration (5 kDa) > Affinity purification (EpCAM)	1DE-LC-ESI-MS/MS	812
163	108	232397980101	MV	23239798	Clin Vaccine Immunol. 2013 Feb;20(2):191-6. doi: 10.1128/CVI.00622-12. Epub 2012 Dec 12.	Proteomic analysis and immunogenicity of Mannheimia haemolytica vesicles.	Prokaryote	Mannheimia haemolytica	In vitro	Mannheimia haemolytica	Normal	Preclearing (10,000 g) > Filtration (0.2 ??m) > Concetration (100 kDa) > Preclearing (20,000 g) > Ultracentrifugation (150,000 g)	LC-ESI-MS/MS	223
164	109	232601410101	sEV	23260141	Cell. 2012 Dec 21;151(7):1542-56. doi: 10.1016/j.cell.2012.11.024.	Exosomes mediate stromal mobilization of autocrine Wnt-PCP signaling in breast cancer cell migration.	Eukaryote	Mus musculus	In vitro	Fibroblast (L cells)	Normal	Preclearing (2000 g, 10,000 g) > Ultracentrifugation (100,000 g) > Sucrose cushion ultracentrifugation (210,000 g) > Ultracentrifugation (100,000 g)	LC-ESI-MS/MS	327
165	110	232645740101	MV	23264574	J Bacteriol. 2013 Mar;195(6):1120-32. doi: 10.1128/JB.02007-12. Epub 2012 Dec 21.	Production of outer membrane vesicles and outer membrane tubes by Francisella novicida.	Prokaryote	Francisella novicida	In vitro	Francisella novicida ATCC 15482	Normal_exponential phase	Preclearing (5000 g, 7500 g) > Filtration (0.22 ???m) > Adding sodium azide > Concentration (100 kDa) > Ultracentrifugation (100,000 g) > Iodixanol density gradient ultracentrifugation (100,000 g)	LC-ESI-MS/MS	99
166	111	232645740102	MV	23264574	J Bacteriol. 2013 Mar;195(6):1120-32. doi: 10.1128/JB.02007-12. Epub 2012 Dec 21.	Production of outer membrane vesicles and outer membrane tubes by Francisella novicida.	Prokaryote	Francisella novicida	In vitro	Francisella novicida ATCC 15482	Normal_early stationary phase	Preclearing (5000 g, 7500 g) > Filtration (0.22 ???m) > Adding sodium azide > Ultracentrifugation (100,000 g) > Ultracentrifugation (100,000 g) > OptiPrep density gradient ultracentrifugation (100,000 g)	LC-ESI-MS/MS	286
167	112	233339270101	sEV	23333927	J Proteomics. 2013 Jan 16;80C:171-182. doi: 10.1016/j.jprot.2012.12.029.	Characterization and proteomic analysis of ovarian cancer-derived exosomes.	Eukaryote	Homo sapiens	In vitro	Ovarian cancer cell (OVCAR-3)	Normal	Preclearing (500 g, 2000 g, 16,500 g) > Ultracentrifugation (120,000 g) > Sucrose cushion ultracentrifugation (120,000 g) > Ultracentrifugation (120,000 g)	1DE-LC-ESI-MS/MS	1713
168	112	233339270102	sEV	23333927	J Proteomics. 2013 Jan 16;80C:171-182. doi: 10.1016/j.jprot.2012.12.029.	Characterization and proteomic analysis of ovarian cancer-derived exosomes.	Eukaryote	Homo sapiens	In vitro	Ovarian cancer cell (IGROV1)	Normal	Preclearing (500 g, 2000 g, 16,500 g) > Ultracentrifugation (120,000 g) > Sucrose cushion ultracentrifugation (120,000 g) > Ultracentrifugation (120,000 g)	1DE-LC-ESI-MS/MS	1424
169	113	233448510101	sEV	23344851	Mol Biosyst. 2013 Jun;9(6):1139-46. doi: 10.1039/c2mb25396h.	Urinary exosomes and diabetic nephropathy: a proteomic approach.	Eukaryote	Rattus norvegicus	In vivo	Urine	Normal	Preclearing (1000 g, 17,000 g) > Ultracentrifugation (200,000 g)	LC-ESI-MS/MS	284
170	113	233448510102	sEV	23344851	Mol Biosyst. 2013 Jun;9(6):1139-46. doi: 10.1039/c2mb25396h.	Urinary exosomes and diabetic nephropathy: a proteomic approach.	Eukaryote	Rattus norvegicus	In vivo	Urine	Diabetes	Preclearing (1000 g, 17,000 g) > Ultracentrifugation (200,000 g)	LC-ESI-MS/MS	284
171	114	233764850101	#N/A	23376485	J Proteomics. 2013 Apr 26;82:193-229. doi: 10.1016/j.jprot.2013.01.012. Epub 2013 Jan 30.	Proteomic analysis of podocyte exosome-enriched fraction from normal human urine.	Eukaryote	Homo sapiens	In vivo	Urine	Normal	Preclearing (2500 g) > Concentration (10 kDa) > Affinity purification (CR1)	1DE-LC-ESI-MS/MS	1230
172	115	234102240101	MV	23410224	J Proteome Res. 2013 Apr 5;12(4):1898-908. doi: 10.1021/pr301208g. Epub 2013 Feb 25.	Quantitative proteomics reveals distinct differences in the protein content of outer membrane vesicle vaccines.	Prokaryote	Neisseria meningitidis	In vitro	Neisseria meningitidis H44/76 (serogroup B)	Normal	Preclearing (2900 g) > Filtration (0.2 ???m) > Concentration (100 kDa) > Ultracentrifugation (125,000 g)	LC-ESI-MS/MS	140
173	116	234366860101	#N/A	23436686	Proteomics. 2013 Apr;13(7):1108-20. doi: 10.1002/pmic.201200531.	A comprehensive characterization of membrane vesicles released by autophagic human endothelial cells.	Eukaryote	Homo sapiens	In vitro	Human umbilical vascular endothelial cells	Serum-starved	Preclearing (1200 g) > Ultracentrifugation (50,000 g)	1DE-LC-ESI-MS/MS	526
174	117	234592120101	sEV	23459212	J Proteomics. 2013 Apr 26;82:141-54. doi: 10.1016/j.jprot.2013.02.013. Epub 2013 Feb 28.	Bovine milk proteome: quantitative changes in normal milk exosomes, milk fat globule membranes and whey proteomes resulting from Staphylococcus aureus mastitis.	Eukaryote	Bos taurus	In vivo	Milk	Staphylococcus aureus-infected	Preclearing (10,000 g) > Ultracentrifugation (150,000 g) > Sucrose cushion ultracentrifugation (200,000 g) > Sucrose cushion ultracentrifugation (112,700 g) > Ultracentrifugation (200,000 g) > Filtration (0.2 ??m)	LC-ESI-MS/MS	2217
175	118	235118370101	sEV	23511837	Mol Biosyst. 2013 Jun;9(6):1220-33. doi: 10.1039/c3mb25582d. Epub 2013 Mar 19.	Differential protein profiling of renal cell carcinoma urinary exosomes.	Eukaryote	Homo sapiens	In vivo	Urine	Normal	Preclearing (1000 g, 17,000 g) > Ultracentrifugation (200,000 g) > Iodixanol density gradient ultracentrifugation (100,000 g) > Ultracentrifugation (100,000 g)	1DE-LC-ESI-MS/MS	259
176	118	235118370102	sEV	23511837	Mol Biosyst. 2013 Jun;9(6):1220-33. doi: 10.1039/c3mb25582d. Epub 2013 Mar 19.	Differential protein profiling of renal cell carcinoma urinary exosomes.	Eukaryote	Homo sapiens	In vivo	Urine	Renal cell carcinoma patient	Preclearing (1000 g, 17,000 g) > Ultracentrifugation (200,000 g) > Iodixanol density gradient ultracentrifugation (100,000 g) > Ultracentrifugation (100,000 g)	1DE-LC-ESI-MS/MS	184
177	119	235331450101	sEV	23533145	Proteomics. 2013 May;13(10-11):1667-71. doi: 10.1002/pmic.201200561. Epub 2013 Apr 23.	In-depth proteomic analyses of exosomes isolated from expressed prostatic secretions in urine.	Eukaryote	Homo sapiens	In vivo	Expressed prostatic secretions in urine	Normal	Preclearing (25,000 g) > Ultracentrifugation (100,000 g)	LC-ESI-MS/MS	868
178	119	235331450102	sEV	23533145	Proteomics. 2013 May;13(10-11):1667-71. doi: 10.1002/pmic.201200561. Epub 2013 Apr 23.	In-depth proteomic analyses of exosomes isolated from expressed prostatic secretions in urine.	Eukaryote	Homo sapiens	In vivo	Expressed prostatic secretions in urine	Low-grade prostate cancer patient	Preclearing (25,000 g) > Ultracentrifugation (100,000 g)	LC-ESI-MS/MS	765
179	120	235854430101	sEV	23585443	Proteomics. 2013 May;13(10-11):1672-86. doi: 10.1002/pmic.201200562.	Proteome profiling of exosomes derived from human primary and metastatic colorectal cancer cells reveal differential expression of key metastatic factors and signal transduction components.	Eukaryote	Homo sapiens	In vitro	Colon cancer cell (SW480)	Normal	Preclearing (480 g, 2000 g, 10,000 g) > Ultracentrifugation (100,000 g) > Iodixanol density gradient ultracentrifugation (100,000 g) > Ultracentrifugation (100,000 g)	1DE-LC-ESI-MS/MS	838
180	120	235854430102	sEV	23585443	Proteomics. 2013 May;13(10-11):1672-86. doi: 10.1002/pmic.201200562.	Proteome profiling of exosomes derived from human primary and metastatic colorectal cancer cells reveal differential expression of key metastatic factors and signal transduction components.	Eukaryote	Homo sapiens	In vitro	Colon cancer cell (SW620)	Normal	Preclearing (480 g, 2000 g, 10,000 g) > Ultracentrifugation (100,000 g) > Iodixanol density gradient ultracentrifugation (100,000 g) > Ultracentrifugation (100,000 g)	1DE-LC-ESI-MS/MS	738
181	121	235854440101	Both	23585444	Proteomics. 2013 Jul;13(14):2125-34. doi: 10.1002/pmic.201200323.	Identification and characterization of proteins isolated from microvesicles derived from human lung cancer pleural effusions.	Eukaryote	Homo sapiens	In vivo	Lung cancer pleural effusion	Non-small cell lung cancer patient	Preclearing (500 g, 800 g) > Sucrose cushion ultracentrifugation (100,000 g) > Iodixanol density gradient ultracentrifugation (100,000 g)	1DE-LC-ESI-MS/MS	845
182	122	236012810101	Both	23601281	Anal Chim Acta. 2013 May 7;776:57-63. doi: 10.1016/j.aca.2013.03.023. Epub 2013 Mar 19.	Proteomic characterization of human platelet-derived microparticles.	Eukaryote	Homo sapiens	In vivo	Blood	Normal	Preclearing (110 g, 710 g) > Ultracentrifugation (150,000 g)	LC-ESI-MS/MS	584
183	123	236454970101	sEV	23645497	Mol Cell Proteomics. 2013 Aug;12(8):2148-59. doi: 10.1074/mcp.M112.027086. Epub 2013 May 3.	Oncogenic H-ras reprograms Madin-Darby canine kidney (MDCK) cell-derived exosomal proteins following epithelial-mesenchymal transition.	Eukaryote	Canis familiaris	In vitro	Madin-Darby canine kidney cell (MDCK)	Normal	Preclearing (480 g, 2000 g, 10,000 g) > Filtration (0.1 ???m) > Concentration (5 kDa) > Iodixanol density gradient ultracentrifugation (100,000 g) > Ultracentrifugation (100,000 g)	1DE-LC-ESI-MS/MS	381
184	123	236454970102	sEV	23645497	Mol Cell Proteomics. 2013 Aug;12(8):2148-59. doi: 10.1074/mcp.M112.027086. Epub 2013 May 3.	Oncogenic H-ras reprograms Madin-Darby canine kidney (MDCK) cell-derived exosomal proteins following epithelial-mesenchymal transition.	Eukaryote	Canis familiaris	In vitro	Ras-transformed MDCK cell (21D1)	Normal	Preclearing (480 g, 2000 g, 10,000 g) > Filtration (0.1 ???m) > Concentration (5 kDa) > Iodixanol density gradient ultracentrifugation (100,000 g) > Ultracentrifugation (100,000 g)	1DE-LC-ESI-MS/MS	399
185	124	236588460101	Both	23658846	PLoS Negl Trop Dis. 2013 May 2;7(5):e2185. doi: 10.1371/journal.pntd.0002185. Print 2013.	Immunomodulatory impact of leishmania-induced macrophage exosomes: a comparative proteomic and functional analysis.	Eukaryote	Mus musculus	In vitro	Macrophage (J774A.1)	Normal	Preclearing (4000 g) > Filtration (0.45 ???m) > Ultracentrifugation (100,000 g) > Filtration (0.22 ???m) > Sucrose cushion ultracentrifugation (100,000 g) > Filtration (0.22 ???m) > Ultracentrifugation (100,000 g)	1DE-LC-ESI-MS/MS	147
186	124	236588460102	Both	23658846	PLoS Negl Trop Dis. 2013 May 2;7(5):e2185. doi: 10.1371/journal.pntd.0002185. Print 2013.	Immunomodulatory impact of leishmania-induced macrophage exosomes: a comparative proteomic and functional analysis.	Eukaryote	Mus musculus	In vitro	Macrophage (J774A.1)	LPS-treated	Preclearing (4000 g) > Filtration (0.45 ???m) > Ultracentrifugation (100,000 g) > Filtration (0.22 ???m) > Sucrose cushion ultracentrifugation (100,000 g) > Filtration (0.22 ???m) > Ultracentrifugation (100,000 g)	1DE-LC-ESI-MS/MS	168
187	124	236588460103	Both	23658846	PLoS Negl Trop Dis. 2013 May 2;7(5):e2185. doi: 10.1371/journal.pntd.0002185. Print 2013.	Immunomodulatory impact of leishmania-induced macrophage exosomes: a comparative proteomic and functional analysis.	Eukaryote	Mus musculus	In vitro	Macrophage (J774A.1)	Leishmania-infected	Preclearing (4000 g) > Filtration (0.45 ???m) > Ultracentrifugation (100,000 g) > Filtration (0.22 ???m) > Sucrose cushion ultracentrifugation (100,000 g) > Filtration (0.22 ???m) > Ultracentrifugation (100,000 g)	1DE-LC-ESI-MS/MS	191
188	125	236604740101	Both	23660474	Mol Cell Proteomics. 2013 Aug;12(8):2205-19. doi: 10.1074/mcp.M113.028589. Epub 2013 May 8.	Heterogeneity in neutrophil microparticles reveals distinct proteome and functional properties.	Eukaryote	Homo sapiens	Ex vivo	Neutrophil	Stimulated in immobile phase	Preclearing (3000 g) > Ultracentrifugation (100,000 g)	1DE-LC-ESI-MS/MS	337
189	125	236604740102	Both	23660474	Mol Cell Proteomics. 2013 Aug;12(8):2205-19. doi: 10.1074/mcp.M113.028589. Epub 2013 May 8.	Heterogeneity in neutrophil microparticles reveals distinct proteome and functional properties.	Eukaryote	Homo sapiens	Ex vivo	Neutrophil	Stimulated in fluid phase	Preclearing (3000 g) > Ultracentrifugation (100,000 g)	1DE-LC-ESI-MS/MS	298
190	126	236843040101	sEV	23684304	Cell Host Microbe. 2013 May 15;13(5):521-34. doi: 10.1016/j.chom.2013.04.009.	Malaria-infected erythrocyte-derived microvesicles mediate cellular communication within the parasite population and with the host immune system.	Eukaryote	Homo sapiens	Ex vivo	Erythrocyte	P. falciparum-infected	Preclearing (600 g, 1600 g, 3600 g, 10,000 g) > Concentration (100 kDa) > Ultracentrifugation (100,000 g) > Sucrose cushion ultracentrifugation (100,000 g) > Ultracentrifugation (100,000 g)	LC-ESI-MS/MS	602
191	127	238186400101	sEV	23818640	Proc Natl Acad Sci U S A. 2013 Jul 30;110(31):E2925-33. doi: 10.1073/pnas.1303906110. Epub 2013 Jul 1.	Modulation of B-cell exosome proteins by gamma herpesvirus infection.	Eukaryote	Homo sapiens	In vitro	Normal B cell (BJAB)	Normal	Preclearing (480 g, 2000 g, 10,000 g) > Filtration (0.22 ???m) > Concentration (100 kDa) > Ultracentrifugation (100,000 g) > Sucrose cushion ultracentrifugation (100,000 g) > Ultracentrifugation (100,000 g)	LC-ESI-MS/MS	869
192	127	238186400102	sEV	23818640	Proc Natl Acad Sci U S A. 2013 Jul 30;110(31):E2925-33. doi: 10.1073/pnas.1303906110. Epub 2013 Jul 1.	Modulation of B-cell exosome proteins by gamma herpesvirus infection.	Eukaryote	Homo sapiens	In vitro	EBV-infected B cell (#1, HLJ, IM9, CP)	Normal	Preclearing (480 g, 2000 g, 10,000 g) > Filtration (0.22 ???m) > Concentration (100 kDa) > Ultracentrifugation (100,000 g) > Sucrose cushion ultracentrifugation (100,000 g) > Ultracentrifugation (100,000 g)	LC-ESI-MS/MS	195
193	127	238186400103	sEV	23818640	Proc Natl Acad Sci U S A. 2013 Jul 30;110(31):E2925-33. doi: 10.1073/pnas.1303906110. Epub 2013 Jul 1.	Modulation of B-cell exosome proteins by gamma herpesvirus infection.	Eukaryote	Homo sapiens	In vitro	KSHV-infected B cell (JC, BC3, BCP1, BCBL1)	Normal	Preclearing (480 g, 2000 g, 10,000 g) > Filtration (0.22 ???m) > Concentration (100 kDa) > Ultracentrifugation (100,000 g) > Sucrose cushion ultracentrifugation (100,000 g) > Ultracentrifugation (100,000 g)	LC-ESI-MS/MS	77
194	127	238186400104	sEV	23818640	Proc Natl Acad Sci U S A. 2013 Jul 30;110(31):E2925-33. doi: 10.1073/pnas.1303906110. Epub 2013 Jul 1.	Modulation of B-cell exosome proteins by gamma herpesvirus infection.	Eukaryote	Homo sapiens	In vitro	EBV- and KSHV-infected B cell (JSC-1, BC1)	Normal	Preclearing (480 g, 2000 g, 10,000 g) > Filtration (0.22 ???m) > Concentration (100 kDa) > Ultracentrifugation (100,000 g) > Sucrose cushion ultracentrifugation (100,000 g) > Ultracentrifugation (100,000 g)	LC-ESI-MS/MS	91
195	128	238440260101	sEV	23844026	PLoS One. 2013 Jul 2;8(7):e67554. doi: 10.1371/journal.pone.0067554. Print 2013.	Characterization of human thymic exosomes.	Eukaryote	Homo sapiens	In vivo	Thymus	Normal	Preclearing (850 g, 3000 g, 10,000 g) > Filtration (0.2 ???m) > Ultracentrifugation (100,000 g)	1DE-LC-ESI-MS/MS	1852
196	129	238535960101	Both	23853596	PLoS Pathog. 2013;9(7):e1003482. doi: 10.1371/journal.ppat.1003482. Epub 2013 Jul 11.	Trichomonas vaginalis exosomes deliver cargo to host cells and mediate hostratioparasite interactions.	Eukaryote	Trichomonas vaginalis	In vitro	Trichomonas vaginalis B7RC2	Normal	Preclearing (500 g) > Filtration (0.22 ???m) > Concentration (100 kDa) > Ultracentrifugation (100,000 g) > Sucrose cushion ultracentrifugation (100,000 g) > Ultracentrifugation (200,000 g)	1DE-LC-ESI-MS/MS	203
197	130	238619040101	sEV	23861904	PLoS One. 2013 Jul 8;8(7):e68451. doi: 10.1371/journal.pone.0068451. Print 2013.	Exosomal signaling during hypoxia mediates microvascular endothelial cell migration and vasculogenesis.	Eukaryote	Homo sapiens	Ex vivo	Placental mesenchymal stem cell	Hypoxic condition	Preclearing (300 g, 2000 g, 12,000 g) > Filtration (0.22 ??m) > Ultracentrifugation (100,000 g) > Sucrose cushion ultracentrifugation (110,000 g) > Ultracentrifugation (110,000 g)	LC-ESI-MS/MS	390
198	131	238866630101	sEV	23886663	Hum Mol Genet. 2013 Dec 15;22(24):4988-5000. doi: 10.1093/hmg/ddt346. Epub 2013 Jul 25.	LRRK2 secretion in exosomes is regulated by 14-3-3.	Eukaryote	Homo sapiens	In vivo	Urine	Normal	Preclearing (500 g, 10,000 g) > Ultracentrifugation (100,000 g) > Iodixanol density gradient ultracentrifugation (500,000 g)	LC-ESI-MS/MS	1622
199	132	238931160101	MV	23893116	J Bacteriol. 2013 Oct;195(19):4425-35. doi: 10.1128/JB.00625-13. Epub 2013 Jul 26.	Comparative proteome analysis of spontaneous outer membrane vesicles and purified outer membranes of Neisseria meningitidis.	Prokaryote	Neisseria meningitidis	In vitro	Neisseria meningitidis MC58	Normal	Preclearing (15,000 g) > Filtration (0.2 ??m) > Ultracentrifugation (200,000 g)	LC-ESI-MS/MS	155
200	133	239355040101	lEV	23935504	PLoS Pathog. 2013;9(8):e1003529. doi: 10.1371/journal.ppat.1003529. Epub 2013 Aug 1.	A novel role for pro-coagulant microvesicles in the early host defense against streptococcus pyogenes.	Eukaryote	Homo sapiens	Ex vivo	Peripheral blood mononucelar cell	Normal	Preclearing (400 g) > Ultracentrifugation (20817 g)	LC-ESI-MS/MS	114
201	133	239355040102	lEV	23935504	PLoS Pathog. 2013;9(8):e1003529. doi: 10.1371/journal.ppat.1003529. Epub 2013 Aug 1.	A novel role for pro-coagulant microvesicles in the early host defense against streptococcus pyogenes.	Eukaryote	Homo sapiens	Ex vivo	Peripheral blood mononucelar cell	Procoagulant (M1 protein-treated)	Preclearing (400 g) > Ultracentrifugation (20817 g)	LC-ESI-MS/MS	78
202	134	239773790101	MV	23977379	PLoS One. 2013 Aug 20;8(8):e73196. doi: 10.1371/journal.pone.0073196. eCollection 2013.	Transcription factor sigmaB plays an important role in the production of extracellular membrane-derived vesicles in Listeria monocytogenes.	Prokaryote	Listeria monocytogenes	In vitro	Listeria monocytogenes 10403S (wild-type)	Normal	Preclearing (6000 g) > Filtration (0.2 ???m) > Concentration (500 kDa) > Ultracentrifugation (150,000 g)	1DE-LC-ESI-MS/MS	126
203	134	239773790102	MV	23977379	PLoS One. 2013 Aug 20;8(8):e73196. doi: 10.1371/journal.pone.0073196. eCollection 2013.	Transcription factor sigmaB plays an important role in the production of extracellular membrane-derived vesicles in Listeria monocytogenes.	Prokaryote	Listeria monocytogenes	In vitro	Listeria monocytogenes 10403S (?sigB mutant)	Normal	Preclearing (6000 g) > Filtration (0.2 ???m) > Concentration (500 kDa) > Ultracentrifugation (150,000 g)	1DE-LC-ESI-MS/MS	88
204	45	239831890101	sEV	23983189	Proteomics. 2013 Oct;13(20):3013-29. doi: 10.1002/pmic.201300142.	Characterization of multiple myeloma vesicles by label-free relative quantitation.	Eukaryote	Homo sapiens	In vitro	B cell (MM.1S)	Normal	Preclearing (300 g, 2000 g, 10,000 g) > Ultracentrifugation (100,000 g)	LC-ESI-MS/MS	293
205	45	239831890102	sEV	23983189	Proteomics. 2013 Oct;13(20):3013-29. doi: 10.1002/pmic.201300142.	Characterization of multiple myeloma vesicles by label-free relative quantitation.	Eukaryote	Homo sapiens	In vitro	B cell (U266)	Normal	Preclearing (300 g, 2000 g, 10,000 g) > Ultracentrifugation (100,000 g)	LC-ESI-MS/MS	262
206	135	240098810101	Both	24009881	J Extracell Vesicles. 2012 Sep 11;1. doi: 10.3402/jev.v1i0.18704. eCollection 2012.	Quantitative proteomics of extracellular vesicles derived from human primary and metastatic colorectal cancer cells.	Eukaryote	Homo sapiens	In vitro	Colorectal cancer cell (SW480)	Normal	Preclearing (500 g, 2000 g) > Concentration (100 kDa) > Sucrose cushion ultracentrifugation (100,000 g) > Iodixanol density gradient ultracentrifugation (175,000 g) > Ultracentrifugation (150,000 g)	1DE-LC-ESI-MS/MS	800
207	135	240098810102	Both	24009881	J Extracell Vesicles. 2012 Sep 11;1. doi: 10.3402/jev.v1i0.18704. eCollection 2012.	Quantitative proteomics of extracellular vesicles derived from human primary and metastatic colorectal cancer cells.	Eukaryote	Homo sapiens	In vitro	Colorectal cancer cell (SW620)	Normal	Preclearing (500 g, 2000 g) > Concentration (100 kDa) > Sucrose cushion ultracentrifugation (100,000 g) > Iodixanol density gradient ultracentrifugation (175,000 g) > Ultracentrifugation (150,000 g)	1DE-LC-ESI-MS/MS	786
208	136	240098860101	sEV	24009886	J Extracell Vesicles. 2012 Apr 16;1. doi: 10.3402/jev.v1i0.18396. eCollection 2012.	Cellular stress conditions are reflected in the protein and RNA content of endothelial cell-derived exosomes.	Eukaryote	Homo sapiens	In vitro	Endothelial cell (HMEC-1)	Stressed (hypoxia, TNF-???-induced activation, high glucose and mannose concentrations)	Preclearing (1500 g, 10,000 g) > Ultracentrifugation (100,000 g)	LC-ESI-MS/MS	1330
209	137	240693780101	sEV	24069378	PLoS One. 2013 Sep 19;8(9):e75054. doi: 10.1371/journal.pone.0075054. eCollection 2013.	Proteome profiling of neuroblastoma-derived exosomes reveal the expression of proteins potentially involved in tumor progression.	Eukaryote	Homo sapiens	In vitro	Neuroblastoma cell (HTLA-230)	Normal	Preclearing (300 g, 10,000 g) > Filtration (0.22 ???m, 0.1 ???m) > Ultracentrifugation (100,000 g)	SCX-LC-ESI-MS/MS	389
210	138	241154470101	Both	24115447	Proteomics. 2013 Nov;13(22):3354-64. doi: 10.1002/pmic.201300282. Epub 2013 Oct 18.	Comparative proteomics evaluation of plasma exosome isolation techniques and assessment of the stability of exosomes in normal human blood plasma.	Eukaryote	Homo sapiens	In vitro	Plasma	Normal_Ultracentrifugation	Preclearing (500 g, 2000 g) > Ultracentrifugation (100,000 g) > Filtration (0.1 ???m) > Ultracentrifugation (100,000 g)	1DE-LC-ESI-MS/MS	73
211	139	241154470102	Both	24115447	Proteomics. 2013 Nov;13(22):3354-64. doi: 10.1002/pmic.201300282. Epub 2013 Oct 18.	Comparative proteomics evaluation of plasma exosome isolation techniques and assessment of the stability of exosomes in normal human blood plasma.	Eukaryote	Homo sapiens	In vitro	Plasma	Normal_Density gradient	Preclearing (500 g, 2000 g) > Ultracentrifugation (100,000 g) > Filtration (0.1 ???m) > Ultracentrifugation (100,000 g) > Iodixanol density gradient ultracentrifugation (100,000 g) > Ultracentrifugation (100,000 g)	1DE-LC-ESI-MS/MS	160
212	140	242114040101	#N/A	24211404	J Proteomics. 2014 Jan 16;96:92-102. doi: 10.1016/j.jprot.2013.10.037. Epub 2013 Nov 7.	Diabetic nephropathy induces changes in the proteome of human urinary exosomes as revealed by label-free comparative analysis.	Eukaryote	Homo sapiens	In vivo	Urine	Normal	ExoQuick	LC-ESI-MS/MS	165
213	140	242114040102	#N/A	24211404	J Proteomics. 2014 Jan 16;96:92-102. doi: 10.1016/j.jprot.2013.10.037. Epub 2013 Nov 7.	Diabetic nephropathy induces changes in the proteome of human urinary exosomes as revealed by label-free comparative analysis.	Eukaryote	Homo sapiens	In vivo	Urine	Diabetic nephropathy	ExoQuick	LC-ESI-MS/MS	179
214	141	242955990101	Both	24295599	J Proteome Res. 2014 Feb 7;13(2):836-43. doi: 10.1021/pr400879c. Epub 2013 Dec 13.	Exosomes from myeloid-derived suppressor cells carry biologically active proteins.	Eukaryote	Mus musculus	Ex vivo	Myeloid-derived suppressor cell	Conventional	Preclearing (2090 g) > Ultracentrifugation (100,000 g) > Sucrose density gradient ultracentrifugation (100,000 g)	LC-ESI-MS/MS	387
215	141	242955990102	Both	24295599	J Proteome Res. 2014 Feb 7;13(2):836-43. doi: 10.1021/pr400879c. Epub 2013 Dec 13.	Exosomes from myeloid-derived suppressor cells carry biologically active proteins.	Eukaryote	Mus musculus	Ex vivo	Myeloid-derived suppressor cell	Inflammtory	Preclearing (2090 g) > Ultracentrifugation (100,000 g) > Sucrose density gradient ultracentrifugation (100,000 g)	LC-ESI-MS/MS	374
216	142	243071870101	MV	24307187	Proteomics. 2014 Feb;14(2-3):222-9. doi: 10.1002/pmic.201300328. Epub 2014 Jan 6.	Proteomic analysis of outer membrane vesicles from the probiotic strain Escherichia coli Nissle 1917.	Prokaryote	Escherichia coli	In vitro	Escherichia coli Nissle 1917	Normal	Preclearing (5,000 g) > Filtration (0.22 ??m) > Ultracentrifugation (150,000 g)	1DE-LC-ESI-MS/MS	191
217	143	243715170101	sEV	24371517	J Extracell Vesicles. 2013 Dec 23;2. doi: 10.3402/jev.v2i0.22097. eCollection 2013.	Exosomal ITGA3 interferes with non-cancerous prostate cell functions and is increased in urine exosomes of metastatic prostate cancer patients.	Eukaryote	Homo sapiens	In vitro	Prostate cancer cell (LNCaP)	Normal	Preclearing (1500 rpm, 20,000 g) > Ultracentrifugation (100,000 g)	1DE-LC-ESI-MS/MS	2288
218	143	243715170102	sEV	24371517	J Extracell Vesicles. 2013 Dec 23;2. doi: 10.3402/jev.v2i0.22097. eCollection 2013.	Exosomal ITGA3 interferes with non-cancerous prostate cell functions and is increased in urine exosomes of metastatic prostate cancer patients.	Eukaryote	Homo sapiens	In vitro	Prostate cancer cell (PC3)	Normal	Preclearing (1500 rpm, 20,000 g) > Ultracentrifugation (100,000 g)	1DE-LC-ESI-MS/MS	2453
219	144	243760830101	sEV	24376083	Proteomics. 2014 Mar;14(6):699-712. doi: 10.1002/pmic.201300452. Epub 2014 Feb 16.	Quantitative proteomics of fractionated membrane and lumen exosome proteins from isogenic metastatic and nonmetastatic bladder cancer cells reveal differential expression of EMT factors.	Eukaryote	Homo sapiens	In vitro	Urinary bladder transitional cell carcinoma (T24)	Normal	Preclearing (400 g, 2000 g, 15,000 g, 20,000 g) > Ultracentrifugation (100,000 g)	LC-ESI-MS/MS	1169
220	144	243760830102	sEV	24376083	Proteomics. 2014 Mar;14(6):699-712. doi: 10.1002/pmic.201300452. Epub 2014 Feb 16.	Quantitative proteomics of fractionated membrane and lumen exosome proteins from isogenic metastatic and nonmetastatic bladder cancer cells reveal differential expression of EMT factors.	Eukaryote	Homo sapiens	In vitro	Urinary bladder transitional cell carcinoma (FL3)	Normal	Preclearing (400 g, 2000 g, 15,000 g, 20,000 g) > Ultracentrifugation (100,000 g)	LC-ESI-MS/MS	1169
221	144	243760830103	sEV	24376083	Proteomics. 2014 Mar;14(6):699-712. doi: 10.1002/pmic.201300452. Epub 2014 Feb 16.	Quantitative proteomics of fractionated membrane and lumen exosome proteins from isogenic metastatic and nonmetastatic bladder cancer cells reveal differential expression of EMT factors.	Eukaryote	Homo sapiens	In vitro	Urinary bladder transitional cell carcinoma (SLT4)	Normal	Preclearing (400 g, 2000 g, 15,000 g, 20,000 g) > Ultracentrifugation (100,000 g)	LC-ESI-MS/MS	1169
222	145	243825520101	MV	24382552	J Proteomics. 2014 Feb 26;98:90-8. doi: 10.1016/j.jprot.2013.12.014. Epub 2013 Dec 29.	Comprehensive proteomic profiling of outer membrane vesicles from Campylobacter jejuni.	Prokaryote	Campylobacter jejuni	In vitro	Campylobacter jejuni NCTC11168	Normal	Preclearing (6000 g) > Filtration (0.22 ??m) > Preclearing (30,000 g) > Ultracentrifugation (150,000 g) > Iodixanol density gradient ultracentrifugation (150,000 g)	LC-ESI-MS/MS	134
223	146	243917180101	sEV	24391718	PLoS One. 2013 Dec 31;8(12):e82589. doi: 10.1371/journal.pone.0082589. eCollection 2013.	Proteomic profiling of exosomes leads to the identification of novel biomarkers for prostate cancer.	Eukaryote	Homo sapiens	In vitro	Immortalized prostate epithelial cell line (PNT2C2)	Normal	Preclearing (400 g, 3000 g, 10,000 g) > Ultracentrifugation (64,000 g) > Sucrose density gradient ultracentrifugation (100,000 g)	LC-ESI-MS/MS	248
224	146	243917180102	sEV	24391718	PLoS One. 2013 Dec 31;8(12):e82589. doi: 10.1371/journal.pone.0082589. eCollection 2013.	Proteomic profiling of exosomes leads to the identification of novel biomarkers for prostate cancer.	Eukaryote	Homo sapiens	In vitro	Immortalized prostate epithelial cell line (RWPE-1)	Normal	Preclearing (400 g, 3000 g, 10,000 g) > Ultracentrifugation (64,000 g) > Sucrose density gradient ultracentrifugation (100,000 g)	LC-ESI-MS/MS	233
225	146	243917180103	sEV	24391718	PLoS One. 2013 Dec 31;8(12):e82589. doi: 10.1371/journal.pone.0082589. eCollection 2013.	Proteomic profiling of exosomes leads to the identification of novel biomarkers for prostate cancer.	Eukaryote	Homo sapiens	In vitro	Prostate cancer cell (PC3467C)	Normal	Preclearing (400 g, 3000 g, 10,000 g) > Ultracentrifugation (64,000 g) > Sucrose density gradient ultracentrifugation (100,000 g)	LC-ESI-MS/MS	169
226	146	243917180104	sEV	24391718	PLoS One. 2013 Dec 31;8(12):e82589. doi: 10.1371/journal.pone.0082589. eCollection 2013.	Proteomic profiling of exosomes leads to the identification of novel biomarkers for prostate cancer.	Eukaryote	Homo sapiens	In vitro	Prostate cancer cell (VCaP)	Normal	Preclearing (400 g, 3000 g, 10,000 g) > Ultracentrifugation (64,000 g) > Sucrose density gradient ultracentrifugation (100,000 g)	LC-ESI-MS/MS	216
227	147	243921110101	sEV	24392111	PLoS One. 2014 Jan 2;9(1):e84153. doi: 10.1371/journal.pone.0084153. eCollection 2014.	Proteomic analysis of C2C12 myoblast and myotube exosome-like vesicles: a new paradigm for myoblast-myotube cross talk?	Eukaryote	Mus musculus	In vitro	Myoblast (C2C12)	Proliferation	Preclearing (2000 g, 10,000 g) > Filtration (0.22 ??m) > Ultracentrifugation (100,000 g)	1DE-LC-ESI-MS/MS	334
228	147	243921110102	sEV	24392111	PLoS One. 2014 Jan 2;9(1):e84153. doi: 10.1371/journal.pone.0084153. eCollection 2014.	Proteomic analysis of C2C12 myoblast and myotube exosome-like vesicles: a new paradigm for myoblast-myotube cross talk?	Eukaryote	Mus musculus	In vitro	Myoblast (C2C12)	Differentiation into myotubes	Preclearing (2000 g, 10,000 g) > Filtration (0.22 ??m) > Ultracentrifugation (100,000 g)	1DE-LC-ESI-MS/MS	383
229	140	244007960101	#N/A	24400796	J Proteome Res. 2014 Feb 7;13(2):581-95. doi: 10.1021/pr400751k. Epub 2014 Jan 16.	Exosomal proteins in the aqueous humor as novel biomarkers in patients with neovascular age-related macular degeneration.	Eukaryote	Homo sapiens	In vitro	Retinal epithelial cell (ARPE-19)	Normal	ExoQuick	1DE-LC-ESI-MS/MS	552
230	140	244007960102	#N/A	24400796	J Proteome Res. 2014 Feb 7;13(2):581-95. doi: 10.1021/pr400751k. Epub 2014 Jan 16.	Exosomal proteins in the aqueous humor as novel biomarkers in patients with neovascular age-related macular degeneration.	Eukaryote	Homo sapiens	In vivo	Aqueous humor of age-related macular degeneration	Normal	ExoQuick	1DE-LC-ESI-MS/MS	169
231	148	244341490101	sEV	24434149	Biochem Biophys Res Commun. 2014 Mar 21;445(4):694-701. doi: 10.1016/j.bbrc.2013.12.070. Epub 2014 Jan 14.	In-depth proteomic analyses of ovarian cancer cell line exosomes reveals differential enrichment of functional categories compared to the NCI 60 proteome.	Eukaryote	Homo sapiens	In vitro	Epithelial ovarian carcinoma cell (OVCAR3, OVCAR433, OVCAR5 , SKOV3)	Normal	Preclearing (300 g, 2000 g, 10,000 g) > Concentration (3 kDa) > Ultracentrifugation (120,000 g)	LC-ESI-MS/MS	3099
232	149	244379240101	MV	24437924	J Proteome Res. 2014 Mar 7;13(3):1345-58. doi: 10.1021/pr4009223. Epub 2014 Jan 29.	Molecular characterization and functional analysis of outer membrane vesicles from the antarctic bacterium Pseudomonas syringae suggest a possible response to environmental conditions.	Prokaryote	Pseudomonas syringae	In vitro	Pseudomonas syringae Lz4W	Normal	Preclearing (10,000 g) > Filtration (0.45 ??m) > Ultracentrifugation (142,032 g) > Sucrose density gradient ultracentrifugation (164,609 g) > Ultracentrifugation (250,000 g)	1DE-LC-ESI-MS/MS	429
233	150	244681610101	Both	24468161	BMC Cancer. 2014 Jan 27;14:44. doi: 10.1186/1471-2407-14-44.	Molecular characterization of exosome-like vesicles from breast cancer cells.	Eukaryote	Homo sapiens	In vitro	Breast cancer cell (MCF7)	Normal	Preclearing (300 g, 1200 g) > Filtration (0.2 ??m) > Ultracentrifugation (100,000 g) > Sucrose density ultracentrifugation (100,000 g) > Ultracentrifugation (100,000 g)	LC-ESI-MS/MS	59
234	150	244681610102	Both	24468161	BMC Cancer. 2014 Jan 27;14:44. doi: 10.1186/1471-2407-14-44.	Molecular characterization of exosome-like vesicles from breast cancer cells.	Eukaryote	Homo sapiens	In vitro	Breast cancer cell (MDA-MB231)	Normal	Preclearing (300 g, 1200 g) > Filtration (0.2 ??m) > Ultracentrifugation (100,000 g) > Sucrose density ultracentrifugation (100,000 g) > Ultracentrifugation (100,000 g)	LC-ESI-MS/MS	88
235	151	245132870101	sEV	24513287	Biochem Biophys Res Commun. 2014 Mar 7;445(2):327-33. doi: 10.1016/j.bbrc.2014.01.183. Epub 2014 Feb 7.	Lipid synthesis is promoted by hypoxic adipocyte-derived exosomes in 3T3-L1 cells.	Eukaryote	Mus musculus	In vitro	Adipocyte (3T3-L1)	Normal	Preclearing (2000 g, 10,000 g) > Ultracentrifugation (100,000 g) > Filtration (0.22 ??m) > Ultracentrifugation (100,000 g)	LC-ESI-MS/MS	223
236	151	245132870102	sEV	24513287	Biochem Biophys Res Commun. 2014 Mar 7;445(2):327-33. doi: 10.1016/j.bbrc.2014.01.183. Epub 2014 Feb 7.	Lipid synthesis is promoted by hypoxic adipocyte-derived exosomes in 3T3-L1 cells.	Eukaryote	Mus musculus	In vitro	Adipocyte (3T3-L1)	Hypoxic condition	Preclearing (2000 g, 10,000 g) > Ultracentrifugation (100,000 g) > Filtration (0.22 ??m) > Ultracentrifugation (100,000 g)	LC-ESI-MS/MS	223
237	152	246079960101	MV	24607996	Mol Cell Proteomics. 2014 May;13(5):1299-317. doi: 10.1074/mcp.M113.029538. Epub 2014 Mar 8.	Quantitative proteomics of the Neisseria gonorrhoeae cell envelope and membrane vesicles for the discovery of potential therapeutic targets.	Prokaryote	Neisseria gonorrhoeae	In vitro	Neisseria gonorrhoeae FA1090	Normal	Filtration (0.22 ??m) > Ultracentrifugation (210,000 g)	SCX-LC-MALDI-MS/MS	356
238	152	246079960102	MV	24607996	Mol Cell Proteomics. 2014 May;13(5):1299-317. doi: 10.1074/mcp.M113.029538. Epub 2014 Mar 8.	Quantitative proteomics of the Neisseria gonorrhoeae cell envelope and membrane vesicles for the discovery of potential therapeutic targets.	Prokaryote	Neisseria gonorrhoeae	In vitro	Neisseria gonorrhoeae F62	Normal	Filtration (0.22 ??m) > Ultracentrifugation (210,000 g)	SCX-LC-MALDI-MS/MS	356
239	152	246079960103	MV	24607996	Mol Cell Proteomics. 2014 May;13(5):1299-317. doi: 10.1074/mcp.M113.029538. Epub 2014 Mar 8.	Quantitative proteomics of the Neisseria gonorrhoeae cell envelope and membrane vesicles for the discovery of potential therapeutic targets.	Prokaryote	Neisseria gonorrhoeae	In vitro	Neisseria gonorrhoeae MS11	Normal	Filtration (0.22 ??m) > Ultracentrifugation (210,000 g)	SCX-LC-MALDI-MS/MS	356
240	152	246079960104	MV	24607996	Mol Cell Proteomics. 2014 May;13(5):1299-317. doi: 10.1074/mcp.M113.029538. Epub 2014 Mar 8.	Quantitative proteomics of the Neisseria gonorrhoeae cell envelope and membrane vesicles for the discovery of potential therapeutic targets.	Prokaryote	Neisseria gonorrhoeae	In vitro	Neisseria gonorrhoeae 1291	Normal	Filtration (0.22 ??m) > Ultracentrifugation (210,000 g)	SCX-LC-MALDI-MS/MS	356
241	153	246142260101	#N/A	24614226	PLoS One. 2014 Mar 10;9(3):e90913. doi: 10.1371/journal.pone.0090913. eCollection 2014.	Extracellular vesicles in luminal fluid of the ovine uterus.	Eukaryote	Ovis aries	In vivo	Uterine luminal fluid	Cyclic (day 14)	Preclearing (21,000 g) > Filtration (0.2 ??m) > ExoQuick	LC-ESI-MS/MS	119
242	153	246142260102	#N/A	24614226	PLoS One. 2014 Mar 10;9(3):e90913. doi: 10.1371/journal.pone.0090913. eCollection 2014.	Extracellular vesicles in luminal fluid of the ovine uterus.	Eukaryote	Ovis aries	In vivo	Uterine luminal fluid	Pregnant (day 14)	Preclearing (21,000 g) > Filtration (0.2 ??m) > ExoQuick	LC-ESI-MS/MS	80
243	154	246209930101	MV	24620993	J Proteome Res. 2014 May 2;13(5):2420-32. doi: 10.1021/pr401227e. Epub 2014 Apr 3.	Porphyromonas gingivalis outer membrane vesicles exclusively contain outer membrane and periplasmic proteins and carry a cargo enriched with virulence factors.	Prokaryote	Porphyromonas gingivalis	In vitro	Porphyromonas gingivalis W50	Normal	Preclearing (8000 g) > Filtration (0.22 ??m) > Ultracentrifugation (213,000 g)	1DE-LC-ESI-MS/MS	147
244	155	246312140101	MV	24631214	Int J Med Microbiol. 2014 May;304(3-4):431-43. doi: 10.1016/j.ijmm.2014.02.006. Epub 2014 Feb 19.	Membrane vesicles of Clostridium perfringens type A strains induce innate and adaptive immunity.	Prokaryote	Clostridium perfringens	In vitro	Clostridium perfringens CP4	Normal	Preclearing (16,000 g) > Filtration (0.45 ??m) > Ultracentrifugation (40,000 g) > Iodixanol density gradient ultracentrifugation (110,000 g) > Ultracentrifugation (110,000 g)	1DE-LC-ESI-MS/MS	424
245	156	246577930101	#N/A	24657793	Am J Obstet Gynecol. 2014 Mar 18. pii: S0002-9378(14)00248-8. doi: 10.1016/j.ajog.2014.03.038.	Plasma biomarker discovery in preeclampsia using a novel differential isolation technology for circulating extracellular vesicles.	Eukaryote	Homo sapiens	In vivo	Plasma	Normal_Cholera toxin part B-binding EVs	Affinity capture with biotinylated cholera toxin part B > Capture with streptavidin-magnet beads	1DE-LC-ESI-MS/MS	397
246	156	246577930102	#N/A	24657793	Am J Obstet Gynecol. 2014 Mar 18. pii: S0002-9378(14)00248-8. doi: 10.1016/j.ajog.2014.03.038.	Plasma biomarker discovery in preeclampsia using a novel differential isolation technology for circulating extracellular vesicles.	Eukaryote	Homo sapiens	In vivo	Plasma	Preeclampsia_Cholera toxin part B-binding EVs	Affinity capture with biotinylated cholera toxin part B > Capture with streptavidin-magnet beads	1DE-LC-ESI-MS/MS	275
247	157	246577930103	#N/A	24657793	Am J Obstet Gynecol. 2014 Mar 18. pii: S0002-9378(14)00248-8. doi: 10.1016/j.ajog.2014.03.038.	Plasma biomarker discovery in preeclampsia using a novel differential isolation technology for circulating extracellular vesicles.	Eukaryote	Homo sapiens	In vivo	Plasma	Normal_Annexin V-binding EVs	Affinity capture with biotinylated Annexin V > Capture with streptavidin-magnet beads	1DE-LC-ESI-MS/MS	308
248	157	246577930104	#N/A	24657793	Am J Obstet Gynecol. 2014 Mar 18. pii: S0002-9378(14)00248-8. doi: 10.1016/j.ajog.2014.03.038.	Plasma biomarker discovery in preeclampsia using a novel differential isolation technology for circulating extracellular vesicles.	Eukaryote	Homo sapiens	In vivo	Plasma	Preeclampsia_Annexin V-binding EVs	Affinity capture with biotinylated Annexin V > Capture with streptavidin-magnet beads	1DE-LC-ESI-MS/MS	261
249	158	246701520101	Both	24670152	J Proteome Res. 2014 May 2;13(5):2468-77. doi: 10.1021/pr4012552. Epub 2014 Apr 16.	Quantitative proteomics of extracellular vesicles released from human monocyte-derived macrophages upon beta-glucan stimulation.	Eukaryote	Homo sapiens	Ex vivo	Monocyte-derived macrophages	Stimulated with beta-glucan	Preclearing (500 g, 3000 g) > Concentration (100 kDa) > Ultracentrifugation (100,000 g)	SCX-LC-ESI-MS/MS	540
250	159	247008640101	sEV	24700864	J Am Soc Nephrol. 2014 Sep;25(9):2017-27. doi: 10.1681/ASN.2013101066. Epub 2014 Apr 3.	Human urinary exosomes as innate immune effectors.	Eukaryote	Homo sapiens	In vivo	Urine	Normal	Preclearing (17,000 g) > Filtration (0.22 ??m) > Ultracentrifugation (235,000 g)	1DE-LC-ESI-MS/MS	583
251	160	247067740101	MV	24706774	Proc Natl Acad Sci U S A. 2014 Apr 15;111(15):E1548-56. doi: 10.1073/pnas.1403683111. Epub 2014 Mar 31.	Proteomic analysis of Vibrio cholerae outer membrane vesicles.	Prokaryote	Vibrio cholerae	In vitro	Vibrio cholerae C6706	Sodium bicarbonate-treated	Preclearing (4500 g) > Filtration (0.22 ??m) > Ultracentrifugation (100,000 g)	LC-ESI-MS/MS	90
252	45	247181020101	sEV	24718102	J Alzheimers Dis. 2014;40 Suppl 1:S47-70. doi: 10.3233/JAD-132135.	Proteins recruited to exosomes by tau overexpression implicate novel cellular mechanisms linking tau secretion with Alzheimer's disease.	Eukaryote	Homo sapiens	In vitro	Neuroblastoma cell (M1C)	Normal	Preclearing (300 g, 2000 g, 10,000 g) > Ultracentrifugation (100,000 g)	LC-ESI-MS/MS	631
253	45	247181020102	sEV	24718102	J Alzheimers Dis. 2014;40 Suppl 1:S47-70. doi: 10.3233/JAD-132135.	Proteins recruited to exosomes by tau overexpression implicate novel cellular mechanisms linking tau secretion with Alzheimer's disease.	Eukaryote	Homo sapiens	In vitro	Neuroblastoma cell (M1C)	4R0N Tau-overexpressed	Preclearing (300 g, 2000 g, 10,000 g) > Ultracentrifugation (100,000 g)	LC-ESI-MS/MS	660
254	161	247294170101	Both	24729417	Proteomics. 2014 Jun;14(12):1494-502. doi: 10.1002/pmic.201300554. Epub 2014 May 16.	Proteomic analysis of hypoxia-induced U373MG glioma secretome reveals novel hypoxia-dependent migration factors.	Eukaryote	Homo sapiens	In vitro	Malignant glioma cell (U373MG)	Nomal	Preclearing (3000 rpm) > Concentration (3 kDa) > Ultracentrifugation (100,000 g)	LC-ESI-MS/MS	236
255	161	247294170102	Both	24729417	Proteomics. 2014 Jun;14(12):1494-502. doi: 10.1002/pmic.201300554. Epub 2014 May 16.	Proteomic analysis of hypoxia-induced U373MG glioma secretome reveals novel hypoxia-dependent migration factors.	Eukaryote	Homo sapiens	In vitro	Malignant glioma cell (U373MG)	Hypoxia	Preclearing (3000 rpm) > Concentration (3 kDa) > Ultracentrifugation (100,000 g)	LC-ESI-MS/MS	236
256	162	247337590101	lEV	24733759	Proteomics. 2014 Jun;14(12):1472-9. doi: 10.1002/pmic.201300485. Epub 2014 May 15.	The overexpression of a single oncogene (ERBB2/HER2) alters the proteomic landscape of extracellular vesicles.	Eukaryote	Homo sapiens	In vitro	Mammary luminal epithelial cell (HB4a)	20K population	Preclearing (300 g, 2000 g, 10,000 g) > Ultracentrifugation (20,000 g)	LC-ESI-MS/MS	490
257	45	247337590102	sEV	24733759	Proteomics. 2014 Jun;14(12):1472-9. doi: 10.1002/pmic.201300485. Epub 2014 May 15.	The overexpression of a single oncogene (ERBB2/HER2) alters the proteomic landscape of extracellular vesicles.	Eukaryote	Homo sapiens	In vitro	Mammary luminal epithelial cell (HB4a)	100K population	Preclearing (300 g, 2000 g, 10,000 g) > Ultracentrifugation (100,000 g)	LC-ESI-MS/MS	341
258	162	247337590103	lEV	24733759	Proteomics. 2014 Jun;14(12):1472-9. doi: 10.1002/pmic.201300485. Epub 2014 May 15.	The overexpression of a single oncogene (ERBB2/HER2) alters the proteomic landscape of extracellular vesicles.	Eukaryote	Homo sapiens	In vitro	Mammary luminal epithelial cell (C5.2)	20K population	Preclearing (300 g, 2000 g, 10,000 g) > Ultracentrifugation (20,000 g)	LC-ESI-MS/MS	554
259	45	247337590104	sEV	24733759	Proteomics. 2014 Jun;14(12):1472-9. doi: 10.1002/pmic.201300485. Epub 2014 May 15.	The overexpression of a single oncogene (ERBB2/HER2) alters the proteomic landscape of extracellular vesicles.	Eukaryote	Homo sapiens	In vitro	Mammary luminal epithelial cell (C5.2)	100K population	Preclearing (300 g, 2000 g, 10,000 g) > Ultracentrifugation (100,000 g)	LC-ESI-MS/MS	382
260	163	247364450101	sEV	24736445	PLoS One. 2014 Apr 15;9(4):e95007. doi: 10.1371/journal.pone.0095007. eCollection 2014.	Absence of metalloprotease GP63 alters the protein content of Leishmania exosomes.	Eukaryote	Leishmania major	In vitro	Leishmania major Friedlin	Wild-type	Preclearing (4000 g, 10,000 g) > Filtration (0.45 ??m) > Ultracentrifugation (100,000 g) > Sucrose density gradient ultracentrifugation (100,000 g) > Filtration (0.22 ??m) > Ultracentrifugation (100,000 g)	1DE-LC-ESI-MS/MS	225
261	163	247364450102	sEV	24736445	PLoS One. 2014 Apr 15;9(4):e95007. doi: 10.1371/journal.pone.0095007. eCollection 2014.	Absence of metalloprotease GP63 alters the protein content of Leishmania exosomes.	Eukaryote	Leishmania major	In vitro	Leishmania major Friedlin	GP63 knockout	Preclearing (4000 g, 10,000 g) > Filtration (0.45 ??m) > Ultracentrifugation (100,000 g) > Sucrose density gradient ultracentrifugation (100,000 g) > Filtration (0.22 ??m) > Ultracentrifugation (100,000 g)	1DE-LC-ESI-MS/MS	209
262	163	247364450103	sEV	24736445	PLoS One. 2014 Apr 15;9(4):e95007. doi: 10.1371/journal.pone.0095007. eCollection 2014.	Absence of metalloprotease GP63 alters the protein content of Leishmania exosomes.	Eukaryote	Leishmania major	In vitro	Leishmania major Friedlin	GP63 rescued	Preclearing (4000 g, 10,000 g) > Filtration (0.45 ??m) > Ultracentrifugation (100,000 g) > Sucrose density gradient ultracentrifugation (100,000 g) > Filtration (0.22 ??m) > Ultracentrifugation (100,000 g)	1DE-LC-ESI-MS/MS	354
263	164	247473030101	Both	24747303	J Proteomics. 2014 May 30;103:227-40. doi: 10.1016/j.jprot.2014.04.008. Epub 2014 Apr 18.	Quantitative proteomic analysis of hepatocyte-secreted extracellular vesicles reveals candidate markers for liver toxicity.	Eukaryote	Rattus norvegicus	Ex vivo	Primary hepatocyte	Normal	Preclearing (500 g) > Filtration (0.22 ??m) > Ultracentrifugation (10,000 g, 100,000 g)	1DE-LC-ESI-MS/MS	216
264	164	247473030102	Both	24747303	J Proteomics. 2014 May 30;103:227-40. doi: 10.1016/j.jprot.2014.04.008. Epub 2014 Apr 18.	Quantitative proteomic analysis of hepatocyte-secreted extracellular vesicles reveals candidate markers for liver toxicity.	Eukaryote	Rattus norvegicus	Ex vivo	Primary hepatocyte	Galactosamine-treated	Preclearing (500 g) > Filtration (0.22 ??m) > Ultracentrifugation (10,000 g, 100,000 g)	1DE-LC-ESI-MS/MS	199
265	164	247473030103	Both	24747303	J Proteomics. 2014 May 30;103:227-40. doi: 10.1016/j.jprot.2014.04.008. Epub 2014 Apr 18.	Quantitative proteomic analysis of hepatocyte-secreted extracellular vesicles reveals candidate markers for liver toxicity.	Eukaryote	Rattus norvegicus	Ex vivo	Primary hepatocyte	LPS-treated	Preclearing (500 g) > Filtration (0.22 ??m) > Ultracentrifugation (10,000 g, 100,000 g)	1DE-LC-ESI-MS/MS	122
266	165	247520760101	sEV	24752076	PLoS One. 2014 Apr 21;9(4):e94663. doi: 10.1371/journal.pone.0094663. eCollection 2014.	Discovery of prognostic biomarker candidates of lacunar infarction by quantitative proteomics of microvesicles enriched plasma.	Eukaryote	Homo sapiens	In vivo	Plasma	Control	Preclearing (4000 g, 12,000 g) > Ultracentrifugation (30,000 g, 200,000 g)	2DE-LC-ESI-MS/MS	245
267	165	247520760102	sEV	24752076	PLoS One. 2014 Apr 21;9(4):e94663. doi: 10.1371/journal.pone.0094663. eCollection 2014.	Discovery of prognostic biomarker candidates of lacunar infarction by quantitative proteomics of microvesicles enriched plasma.	Eukaryote	Homo sapiens	In vivo	Plasma	Lacunar infarction-no adverse outcome	Preclearing (4000 g, 12,000 g) > Ultracentrifugation (30,000 g, 200,000 g)	2DE-LC-ESI-MS/MS	245
268	165	247520760103	sEV	24752076	PLoS One. 2014 Apr 21;9(4):e94663. doi: 10.1371/journal.pone.0094663. eCollection 2014.	Discovery of prognostic biomarker candidates of lacunar infarction by quantitative proteomics of microvesicles enriched plasma.	Eukaryote	Homo sapiens	In vivo	Plasma	Lacunar infarction-recurrent vascular events	Preclearing (4000 g, 12,000 g) > Ultracentrifugation (30,000 g, 200,000 g)	2DE-LC-ESI-MS/MS	245
269	165	247520760104	sEV	24752076	PLoS One. 2014 Apr 21;9(4):e94663. doi: 10.1371/journal.pone.0094663. eCollection 2014.	Discovery of prognostic biomarker candidates of lacunar infarction by quantitative proteomics of microvesicles enriched plasma.	Eukaryote	Homo sapiens	In vivo	Plasma	Lacunar infarction-cognitive decline without recurrent vascular events	Preclearing (4000 g, 12,000 g) > Ultracentrifugation (30,000 g, 200,000 g)	2DE-LC-ESI-MS/MS	245
270	166	247692330101	sEV	24769233	J Proteomics. 2014 Jun 25;106:191-204. doi: 10.1016/j.jprot.2014.04.028. Epub 2014 Apr 24.	Proteomic analysis of cerebrospinal fluid extracellular vesicles: a comprehensive dataset.	Eukaryote	Homo sapiens	In vivo	Cerebrospinal fluid	Normal	Preclearing (500 g, 2000 g, 20,000 g) > Ultracentrifugation (100,000 g)	1DE-LC-ESI-MS/MS	1300
271	167	247692400101	MV	24769240	J Proteomics. 2014 Jun 25;106:46-60. doi: 10.1016/j.jprot.2014.04.023. Epub 2014 Apr 24.	Characterization of protective extracellular membrane-derived vesicles produced by Streptococcus pneumoniae.	Prokaryote	Streptococcus pneumoniae	In vitro	Streptococcus pneumoniae R6	Normal	Preclearing (3450 g) > Filtration (0.22 ??m) > Ultracentrifugation (100,000 g) > Iodixanol density gradient ultracentrifugation (100,000 g) > Ultracentrifugation (100,000 g)	LC-ESI-MS/MS	187
272	167	247692400102	MV	24769240	J Proteomics. 2014 Jun 25;106:46-60. doi: 10.1016/j.jprot.2014.04.023. Epub 2014 Apr 24.	Characterization of protective extracellular membrane-derived vesicles produced by Streptococcus pneumoniae.	Prokaryote	Streptococcus pneumoniae	In vitro	Streptococcus pneumoniae ST1	Normal	Preclearing (3450 g) > Filtration (0.22 ??m) > Ultracentrifugation (100,000 g) > Iodixanol density gradient ultracentrifugation (100,000 g) > Ultracentrifugation (100,000 g)	LC-ESI-MS/MS	300
273	167	247692400103	MV	24769240	J Proteomics. 2014 Jun 25;106:46-60. doi: 10.1016/j.jprot.2014.04.023. Epub 2014 Apr 24.	Characterization of protective extracellular membrane-derived vesicles produced by Streptococcus pneumoniae.	Prokaryote	Streptococcus pneumoniae	In vitro	Streptococcus pneumoniae ST6B	Normal	Preclearing (3450 g) > Filtration (0.22 ??m) > Ultracentrifugation (100,000 g) > Iodixanol density gradient ultracentrifugation (100,000 g) > Ultracentrifugation (100,000 g)	LC-ESI-MS/MS	371
274	167	247692400104	MV	24769240	J Proteomics. 2014 Jun 25;106:46-60. doi: 10.1016/j.jprot.2014.04.023. Epub 2014 Apr 24.	Characterization of protective extracellular membrane-derived vesicles produced by Streptococcus pneumoniae.	Prokaryote	Streptococcus pneumoniae	In vitro	Streptococcus pneumoniae ST8	Normal	Preclearing (3450 g) > Filtration (0.22 ??m) > Ultracentrifugation (100,000 g) > Iodixanol density gradient ultracentrifugation (100,000 g) > Ultracentrifugation (100,000 g)	LC-ESI-MS/MS	181
275	167	247692400105	MV	24769240	J Proteomics. 2014 Jun 25;106:46-60. doi: 10.1016/j.jprot.2014.04.023. Epub 2014 Apr 24.	Characterization of protective extracellular membrane-derived vesicles produced by Streptococcus pneumoniae.	Prokaryote	Streptococcus pneumoniae	In vitro	Streptococcus pneumoniae ST23F	Normal	Preclearing (3450 g) > Filtration (0.22 ??m) > Ultracentrifugation (100,000 g) > Iodixanol density gradient ultracentrifugation (100,000 g) > Ultracentrifugation (100,000 g)	LC-ESI-MS/MS	194
276	168	247731280101	sEV	24773128	Vet Clin Pathol. 2014 Jun;43(2):193-205. doi: 10.1111/vcp.12147. Epub 2014 Apr 28.	Characterization of the canine urinary proteome.	Eukaryote	Canis familiaris	In vivo	Urine	Normal	Preclearing (17,000 g) > Ultracentrifugation (113,000 g)	1DE-LC-ESI-MS/MS	336
277	169	247950970101	MV	24795097	Dokl Biochem Biophys. 2014 Mar;455(1):43-8. doi: 10.1134/S160767291402001X. Epub 2014 May 3.	Exported mycoplasmal proteins: proteome of extracellular membrane vesicles of Acholeplasma laidlawii PG8.	Prokaryote	Acholeplasma laidlawii	In vitro	Acholeplasma laidlawii PG8	Normal	Preclearing (15,000 g) > Filtration (0.22 ??m) > Ultracentrifugation (150,000 g)	LC-ESI-MS/MS	97
278	170	248269030101	MV	24826903	Mol Microbiol. 2014 Jul;93(1):183-98. doi: 10.1111/mmi.12650. Epub 2014 Jun 4.	Extracellular vesicles produced by the Gram-positive bacterium Bacillus subtilis are disrupted by the lipopeptide surfactin.	Prokaryote	Bacillus subtilis	In vitro	Bacillus subtilis 168	Normal	Preclearing (15,000 g) > Filtration (0.22 ??m) > Concentration (100 kDa) > Filtration (0.8 ??m) > Ultracentrifugation (195,000 g)	LC-ESI-MS/MS	105
279	171	249194120101	MV	24919412	Environ Microbiol. 2014 Jun 11. doi: 10.1111/1462-2920.12535.	Outer membrane vesicles are vehicles for the delivery of Vibrio tasmaniensis virulence factors to oyster immune cells.	Prokaryote	Vibrio tasmaniensis	In vitro	Vibrio tasmaniensis LGP32	Normal	Preclearing (16,000 g) > Filtration (0.22 ??m) > Ultracentrifugation (100,000 g) > Iodixanol density gradient ultracentrifugation (100,000 g)	1DE-LC-ESI-MS/MS	132
280	172	249359730101	MV	24935973	Infect Immun. 2014 Oct;82(10):4001-10. doi: 10.1128/IAI.01416-13. Epub 2014 Jun 16.	Identification and Characterization of Outer Membrane Vesicle-Associated Proteins in Salmonella enterica Serovar Typhimurium.	Prokaryote	Salmonella enterica	In vitro	Salmonella enterica serovar Typhimurium 14028S	Growth in LB	Preclearing (10,000 g) > Filtration (0.45 ??m) > Concentration (100 kDa) > Filtration (0.45 ??m) > Ultracentrifugation (150,000 g) > Iodixanol density gradient ultracentrifugation (150,000 g) > Ultracentrifugation (150,000 g)	1DE-LC-ESI-MS/MS	163
281	172	249359730102	MV	24935973	Infect Immun. 2014 Oct;82(10):4001-10. doi: 10.1128/IAI.01416-13. Epub 2014 Jun 16.	Identification and Characterization of Outer Membrane Vesicle-Associated Proteins in Salmonella enterica Serovar Typhimurium.	Prokaryote	Salmonella enterica	In vitro	Salmonella enterica serovar Typhimurium 14028S	Growth in acidic low-magnesium minimal medium	Preclearing (10,000 g) > Filtration (0.45 ??m) > Concentration (100 kDa) > Filtration (0.45 ??m) > Ultracentrifugation (150,000 g) > Iodixanol density gradient ultracentrifugation (150,000 g) > Ultracentrifugation (150,000 g)	1DE-LC-ESI-MS/MS	168
282	173	249398450101	sEV	24939845	J Biol Chem. 2014 Aug 8;289(32):22284-305. doi: 10.1074/jbc.M114.549659. Epub 2014 Jun 17.	Human T-lymphotropic Virus Type 1-infected Cells Secrete Exosomes That Contain Tax Protein.	Eukaryote	Homo sapiens	In vitro	T cells (CEM-T4)	Control	Preclearing (2000 rpm, 4000 rpm) > Filtration (0.22 ??m) > Preclearing (10,000 g) > Ultracentrifugation (100,000 g)	LC-ESI-MS/MS	151
283	173	249398450102	sEV	24939845	J Biol Chem. 2014 Aug 8;289(32):22284-305. doi: 10.1074/jbc.M114.549659. Epub 2014 Jun 17.	Human T-lymphotropic Virus Type 1-infected Cells Secrete Exosomes That Contain Tax Protein.	Eukaryote	Homo sapiens	In vitro	T cells (C8166-45)	HTLV-1-infected, without producing infectious virus	Preclearing (2000 rpm, 4000 rpm) > Filtration (0.22 ??m) > Preclearing (10,000 g) > Ultracentrifugation (100,000 g)	LC-ESI-MS/MS	119
284	173	249398450103	sEV	24939845	J Biol Chem. 2014 Aug 8;289(32):22284-305. doi: 10.1074/jbc.M114.549659. Epub 2014 Jun 17.	Human T-lymphotropic Virus Type 1-infected Cells Secrete Exosomes That Contain Tax Protein.	Eukaryote	Homo sapiens	In vitro	T cells (MT2)	HTLV-1-infected, with producing high levels of infectious virus	Preclearing (2000 rpm, 4000 rpm) > Filtration (0.22 ??m) > Preclearing (10,000 g) > Ultracentrifugation (100,000 g)	LC-ESI-MS/MS	107
285	173	249398450104	sEV	24939845	J Biol Chem. 2014 Aug 8;289(32):22284-305. doi: 10.1074/jbc.M114.549659. Epub 2014 Jun 17.	Human T-lymphotropic Virus Type 1-infected Cells Secrete Exosomes That Contain Tax Protein.	Eukaryote	Homo sapiens	In vitro	T cells (ED40515(-))	HTLV-1-infected, Tax-negative	Preclearing (2000 rpm, 4000 rpm) > Filtration (0.22 ??m) > Preclearing (10,000 g) > Ultracentrifugation (100,000 g)	LC-ESI-MS/MS	143
286	174	250292660101	lEV	25029266	Am J Respir Cell Mol Biol. 2014 Jul 16.	Pathologic Mechanical Stress and Endotoxin Exposure Increases Lung Endothelial Microparticle Shedding.	Eukaryote	Homo sapiens	In vitro	Pulmonary artery endothlelial cell (HPAEC)	Control	Preclearing (500 g, 3000 g) > Ultracentrifugation (21,000 g)	LC-ESI-MS/MS	115
287	174	250292660102	lEV	25029266	Am J Respir Cell Mol Biol. 2014 Jul 16.	Pathologic Mechanical Stress and Endotoxin Exposure Increases Lung Endothelial Microparticle Shedding.	Eukaryote	Homo sapiens	In vitro	Pulmonary artery endothlelial cell (HPAEC)	5% cyclic stretch-treated	Preclearing (500 g, 3000 g) > Ultracentrifugation (21,000 g)	LC-ESI-MS/MS	113
288	174	250292660103	lEV	25029266	Am J Respir Cell Mol Biol. 2014 Jul 16.	Pathologic Mechanical Stress and Endotoxin Exposure Increases Lung Endothelial Microparticle Shedding.	Eukaryote	Homo sapiens	In vitro	Pulmonary artery endothlelial cell (HPAEC)	18% cyclic stretch-treated	Preclearing (500 g, 3000 g) > Ultracentrifugation (21,000 g)	LC-ESI-MS/MS	139
289	174	250292660104	lEV	25029266	Am J Respir Cell Mol Biol. 2014 Jul 16.	Pathologic Mechanical Stress and Endotoxin Exposure Increases Lung Endothelial Microparticle Shedding.	Eukaryote	Homo sapiens	In vitro	Pulmonary artery endothlelial cell (HPAEC)	LPS-treated	Preclearing (500 g, 3000 g) > Ultracentrifugation (21,000 g)	LC-ESI-MS/MS	177
290	175	250656440101	Both	25065644	Proteomics. 2014 Jul 27. doi: 10.1002/pmic.201300477.	Exosome-mediated extracellular release of polyadenylate-binding protein 1 in human metastatic duodenal cancer cells.	Eukaryote	Homo sapiens	In vitro	Duodenal cancer cell (AZ-521)	Normal	Preclearing (800 g, 2000 g) > Filtration (0.1 ??m) > Concentration (100 kDa) > Ultracentrifugation (100,000 g)	LC-ESI-MS/MS	81
291	176	250880520101	MV	25088052	J Proteomics. 2014 Oct 14;110:117-28. doi: 10.1016/j.jprot.2014.07.020. Epub 2014 Jul 31.	Extracellular membrane vesicles secreted by mycoplasma Acholeplasma laidlawii PG8 are enriched in virulence proteins.	Prokaryote	Acholeplasma laidlawii	In vitro	Acholeplasma laidlawii PG8	Normal	Preclearing (5000 g) > Concentration (100 kDa) > Ultracentrifugation (100,000 g) > Iodixanol density gradient ultracentrifugation (100,000 g)	LC-ESI-MS/MS	97
292	177	251024700101	sEV	25102470	Biochim Biophys Acta. 2014 Nov;1838(11):2954-65. doi: 10.1016/j.bbamem.2014.07.026. Epub 2014 Aug 4.	Examination of the specificity of tumor cell derived exosomes with tumor cells in vitro.	Eukaryote	Homo sapiens	In vitro	Breast cancer cell (MCF-7)	Normal	Preclearing (300 g, 15,000 g) > Ultracentrifugation (100,000 g) > Sucrose cushion ultracentrifugation (200,000 g) > Ultracentrifugation (100,000 g)	LC-ESI-MS/MS	59
293	177	251024700102	sEV	25102470	Biochim Biophys Acta. 2014 Nov;1838(11):2954-65. doi: 10.1016/j.bbamem.2014.07.026. Epub 2014 Aug 4.	Examination of the specificity of tumor cell derived exosomes with tumor cells in vitro.	Eukaryote	Homo sapiens	In vitro	Prostate cancer cell (PC-3)	Normal	Preclearing (300 g, 15,000 g) > Ultracentrifugation (100,000 g) > Sucrose cushion ultracentrifugation (200,000 g) > Ultracentrifugation (100,000 g)	LC-ESI-MS/MS	80
294	178	251124740101	MV	25112474	J Bacteriol. 2014 Aug 11. pii: JB.01760-14.	Epoxide-Mediated Differential Packaging of Cif and other Virulence Factors into Outer Membrane Vesicles.	Prokaryote	Pseudomonas aeruginosa	In vitro	Pseudomonas aeruginosa PA14	Normal	Preclearing (10,000 g) > Filtration (0.45 ??m) > Concentration (100 kDa) > Ultracentrifugation (39,000 g) > Iodixanol density gradient ultracentrifugation (100,000 g)	1DE-LC-ESI-MS/MS	365
295	178	251124740102	MV	25112474	J Bacteriol. 2014 Aug 11. pii: JB.01760-14.	Epoxide-Mediated Differential Packaging of Cif and other Virulence Factors into Outer Membrane Vesicles.	Prokaryote	Pseudomonas aeruginosa	In vitro	Pseudomonas aeruginosa (clinical isolate, cystic fibrosis)	Normal	Preclearing (10,000 g) > Filtration (0.45 ??m) > Concentration (100 kDa) > Ultracentrifugation (39,000 g) > Iodixanol density gradient ultracentrifugation (100,000 g)	1DE-LC-ESI-MS/MS	239
296	179	251572330101	sEV	25157233	Front Pharmacol. 2014 Aug 11;5:175. doi: 10.3389/fphar.2014.00175. eCollection 2014.	Extravillous trophoblast cells-derived exosomes promote vascular smooth muscle cell migration.	Eukaryote	Homo sapiens	In vitro	Choriocarcinoma cell (JEG3)	Normal	Preclearing (300 g, 2000 g, 12,000 g) > Filtration (0.22 ??m) > Ultracentrifugation (120,000 g) > Sucrose cushion ultracentrifugation (110,000 g)	LC-ESI-MS/MS	84
297	179	251572330102	sEV	25157233	Front Pharmacol. 2014 Aug 11;5:175. doi: 10.3389/fphar.2014.00175. eCollection 2014.	Extravillous trophoblast cells-derived exosomes promote vascular smooth muscle cell migration.	Eukaryote	Homo sapiens	In vitro	Extravillous trophoblast cell (HTR8/SVneo)	Normal	Preclearing (300 g, 2000 g, 12,000 g) > Filtration (0.22 ??m) > Ultracentrifugation (120,000 g) > Sucrose cushion ultracentrifugation (110,000 g)	LC-ESI-MS/MS	83
298	180	251678410101	#N/A	25167841	Sci Rep. 2014 Aug 29;4:6232. doi: 10.1038/srep06232.	Antibody-coupled monolithic silica microtips for highthroughput molecular profiling of circulating exosomes.	Eukaryote	Homo sapiens	In vivo	Serum	Normal	Anti-CD9-monolith pipette tips	LC-ESI-MS/MS	1352
299	181	251985190101	MV	25198519	J Proteome Res. 2014 Oct 3;13(10):4298-309. doi: 10.1021/pr500411d. Epub 2014 Sep 19.	Proteomic characterization of the outer membrane vesicle of Pseudomonas putida KT2440.	Prokaryote	Pseudomonas putida	In vitro	Pseudomonas putida KT2440	LB	Preclearing (7000 g) > Filtration (0.2 ??m) > Concentration (100 kDa) > Ultracentrifugation (150,000 g) > Sucrose density gradient ultracentrifugation (200,000 g) > Ultracentrifugation (150,000 g)	1DE-LC-ESI-MS/MS	243
300	181	251985190102	MV	25198519	J Proteome Res. 2014 Oct 3;13(10):4298-309. doi: 10.1021/pr500411d. Epub 2014 Sep 19.	Proteomic characterization of the outer membrane vesicle of Pseudomonas putida KT2440.	Prokaryote	Pseudomonas putida	In vitro	Pseudomonas putida KT2440	Minimal medium (+succinate)	Preclearing (7000 g) > Filtration (0.2 ??m) > Concentration (100 kDa) > Ultracentrifugation (150,000 g) > Sucrose density gradient ultracentrifugation (200,000 g) > Ultracentrifugation (150,000 g)	1DE-LC-ESI-MS/MS	359
301	181	251985190103	MV	25198519	J Proteome Res. 2014 Oct 3;13(10):4298-309. doi: 10.1021/pr500411d. Epub 2014 Sep 19.	Proteomic characterization of the outer membrane vesicle of Pseudomonas putida KT2440.	Prokaryote	Pseudomonas putida	In vitro	Pseudomonas putida KT2440	Minimal medium (+benzoate)	Preclearing (7000 g) > Filtration (0.2 ??m) > Concentration (100 kDa) > Ultracentrifugation (150,000 g) > Sucrose density gradient ultracentrifugation (200,000 g) > Ultracentrifugation (150,000 g)	1DE-LC-ESI-MS/MS	456
302	182	251986970101	MV	25198697	PLoS One. 2014 Sep 8;9(9):e107002. doi: 10.1371/journal.pone.0107002. eCollection 2014.	Production of outer membrane vesicles by the plague pathogen Yersinia pestis.	Prokaryote	Yerisinia pestis	In vitro	Yersinia pestis CO92	Normal	Preclearing (5000 g) > Filtration (0.22 ??m) > Concentration (100 kDa) > Ultracentrifugation (180,000 g) > Iodixanol density gradient ultracentrifugation (100,000 g)	LC-ESI-MS/MS	270
303	183	252500220101	MV	25250022	Front Microbiol. 2014 Sep 9;5:474. doi: 10.3389/fmicb.2014.00474. eCollection 2014.	The lethal cargo of Myxococcus xanthus outer membrane vesicles.	Prokaryote	Myxococcus xanthus	In vitro	Myxococcus xanthus DZ2	Normal	Preclearing (5000 g) > Filtration (0.45 ??m, 0.22 ??m) > Ultracentrifugation (140,000 g)	1DE-LC-ESI-MS/MS	234
304	184	255248080101	MV	25524808	Microbiologyopen. 2014 Dec 18. doi: 10.1002/mbo3.221.	Fimbriae-mediated outer membrane vesicle production and invasion of Porphyromonas gingivalis.	Prokaryote	Porphyromonas gingivalis	In vitro	Porphyromonas gingivalis ATCC 33277	Normal	Preclearing (10,000 g) > Filtration (0.22 ??m) > Ultracentrifugation (126,000 g)	1DE-LC-ESI-MS/MS	67
305	184	255248080102	MV	25524808	Microbiologyopen. 2014 Dec 18. doi: 10.1002/mbo3.221.	Fimbriae-mediated outer membrane vesicle production and invasion of Porphyromonas gingivalis.	Prokaryote	Porphyromonas gingivalis	In vitro	Porphyromonas gingivalis W83	Normal	Preclearing (10,000 g) > Filtration (0.22 ??m) > Ultracentrifugation (126,000 g)	1DE-LC-ESI-MS/MS	70
306	185	255813020101	MV	25581302	PLoS One. 2015 Jan 12;10(1):e0116896. doi: 10.1371/journal.pone.0116896. eCollection 2015.	Outer-inner membrane vesicles naturally secreted by gram-negative pathogenic bacteria.	Prokaryote	Neisseria gonorrhoeae	In vitro	Neisseria gonorrhoeae DMS 15130	Normal	Preclearing (10,000 g) > Filtration (0.45 ??m) > Ultracentrifugation (40,000 g) > Filtration (0.22 ??m) > Iodixanol density gradient ultracentrifugation (100,000 g)	1DE-LC-ESI-MS/MS	161
307	186	255939280101	Both	25593928	Front Med (Lausanne). 2015 Jan 5;1:57. doi: 10.3389/fmed.2014.00057. eCollection 2014.	Perturbations in the urinary exosome in transplant rejection.	Eukaryote	Homo sapiens	In vivo	Urine	Normal	Preclearing (2000 g) > Ultracentrifugation (200,000 g)	2DE-LC-ESI-MS/MS	348
308	187	256617350101	lEV	25661735	Cancer Lett. 2015 Feb 4. pii: S0304-3835(15)00066-X. doi: 10.1016/j.canlet.2015.01.032.	Membrane microvesicles as mediators for melanoma-fibroblasts communication: Roles of the VCAM-1/VLA-4 axis and the ERK1/2 signal pathway.	Eukaryote	Mus musculus	In vitro	Melanoma cell (B16-F10)	Normal	Preclearing (300 g, 1500 g) > Ultracentrifugation (14,000 g)	LC-ESI-MS/MS	7353
309	188	256695900101	MV	25669590	Helicobacter. 2015 Feb 9. doi: 10.1111/hel.12196.	Increased Outer Membrane Vesicle Formation in a Helicobacter pylori tolB Mutant.	Prokaryote	Helicobacter pylori	In vitro	Helicobacter pylori 251	Wild-type	Preclearing (10,000 g) > Filtration (0.22 ??m) > Ultracentrifugation (100,000 g)	LC-ESI-MS/MS	88
310	188	256695900102	MV	25669590	Helicobacter. 2015 Feb 9. doi: 10.1111/hel.12196.	Increased Outer Membrane Vesicle Formation in a Helicobacter pylori tolB Mutant.	Prokaryote	Helicobacter pylori	In vitro	Helicobacter pylori 251	??tolB mutant	Preclearing (10,000 g) > Filtration (0.22 ??m) > Ultracentrifugation (100,000 g)	LC-ESI-MS/MS	112
311	188	256695900103	MV	25669590	Helicobacter. 2015 Feb 9. doi: 10.1111/hel.12196.	Increased Outer Membrane Vesicle Formation in a Helicobacter pylori tolB Mutant.	Prokaryote	Helicobacter pylori	In vitro	Helicobacter pylori 251	??tolB mutant (tolB+)	Preclearing (10,000 g) > Filtration (0.22 ??m) > Ultracentrifugation (100,000 g)	LC-ESI-MS/MS	120
312	188	256695900104	MV	25669590	Helicobacter. 2015 Feb 9. doi: 10.1111/hel.12196.	Increased Outer Membrane Vesicle Formation in a Helicobacter pylori tolB Mutant.	Prokaryote	Helicobacter pylori	In vitro	Helicobacter pylori 251	??pal mutant	Preclearing (10,000 g) > Filtration (0.22 ??m) > Ultracentrifugation (100,000 g)	LC-ESI-MS/MS	110
313	188	256695900105	MV	25669590	Helicobacter. 2015 Feb 9. doi: 10.1111/hel.12196.	Increased Outer Membrane Vesicle Formation in a Helicobacter pylori tolB Mutant.	Prokaryote	Helicobacter pylori	In vitro	Helicobacter pylori 251	??pal mutant (pal+)	Preclearing (10,000 g) > Filtration (0.22 ??m) > Ultracentrifugation (100,000 g)	LC-ESI-MS/MS	97
314	188	256695900106	MV	25669590	Helicobacter. 2015 Feb 9. doi: 10.1111/hel.12196.	Increased Outer Membrane Vesicle Formation in a Helicobacter pylori tolB Mutant.	Prokaryote	Helicobacter pylori	In vitro	Helicobacter pylori 251	??tolBpal mutant	Preclearing (10,000 g) > Filtration (0.22 ??m) > Ultracentrifugation (100,000 g)	LC-ESI-MS/MS	78
315	188	256695900107	MV	25669590	Helicobacter. 2015 Feb 9. doi: 10.1111/hel.12196.	Increased Outer Membrane Vesicle Formation in a Helicobacter pylori tolB Mutant.	Prokaryote	Helicobacter pylori	In vitro	Helicobacter pylori 251	??tolB mutant (tolBpal+)	Preclearing (10,000 g) > Filtration (0.22 ??m) > Ultracentrifugation (100,000 g)	LC-ESI-MS/MS	53
316	189	257114380101	Both	25711438	Circ Res. 2015 Feb 23. pii: CIRCRESAHA.114.305012.	Vascular Smooth Muscle Cell Calcification is Mediated by Regulated Exosome Secretion.	Eukaryote	Homo sapiens	Ex vivo	Aortic vascular smooth muscle cell	Normal	Preclearing (2500 rpm) > Ultracentrifugation (100,000 g)	1DE-LC-ESI-MS/MS	345
317	190	257147190101	MV	25714719	MBio. 2015 Feb 24;6(2). pii: e02575-14. doi: 10.1128/mBio.02575-14.	LytM Proteins Play a Crucial Role in Cell Separation, Outer Membrane Composition, and Pathogenesis in Nontypeable Haemophilus influenzae.	Prokaryote	Haemophilus influenzae	In vitro	Haemophilus influenzae 176	Wild-type	Preclearing (13,000 g) > Filtration (0.22 ??m)> Ultracentrifugation (200,000 g)	LC-ESI-MS/MS	51
318	190	257147190102	MV	25714719	MBio. 2015 Feb 24;6(2). pii: e02575-14. doi: 10.1128/mBio.02575-14.	LytM Proteins Play a Crucial Role in Cell Separation, Outer Membrane Composition, and Pathogenesis in Nontypeable Haemophilus influenzae.	Prokaryote	Haemophilus influenzae	In vitro	Haemophilus influenzae 176	??envC	Preclearing (13,000 g) > Filtration (0.22 ??m)> Ultracentrifugation (200,000 g)	LC-ESI-MS/MS	52
319	191	257551790101	sEV	25755179	Proteomics Clin Appl. 2015 Mar 9. doi: 10.1002/prca.201400199.	Urinary extracellular vesicles as reservoirs of altered proteins during the pathogenesis of polycystic kidney disease.	Eukaryote	Homo sapiens	In vivo	Urine	Autosomal dominant polycystic kidney disease	Preclearing (400 g, 800 g, 15,000 g) > Ultracentrifugation (200,000 g) > Sucrose cushion ultracentrifugation (110,000 g) > Ultracentrifugation (200,000 g)	LC-ESI-MS/MS	172
320	192	257737720101	MV	25773772	Microb Pathog. 2015 Mar 12. pii: S0882-4010(15)00044-3. doi: 10.1016/j.micpath.2015.03.009.	Outer membrane vesicles isolated from two clinical Acinetobacter baumannii strains exhibit different toxicity and proteome characteristics.	Prokaryote	Acinetobacter baumannii	In vitro	Acinetobacter baumannii A38	Normal	Preclearing (6000 g) > Filtration (0.22 ??m) > Concentration (100 kDa) > Ultracentrifugation (150,000 g)	LC-ESI-MS/MS	134
321	192	257737720102	MV	25773772	Microb Pathog. 2015 Mar 12. pii: S0882-4010(15)00044-3. doi: 10.1016/j.micpath.2015.03.009.	Outer membrane vesicles isolated from two clinical Acinetobacter baumannii strains exhibit different toxicity and proteome characteristics.	Prokaryote	Acinetobacter baumannii	In vitro	Acinetobacter baumannii 5806	Normal	Preclearing (6000 g) > Filtration (0.22 ??m) > Concentration (100 kDa) > Ultracentrifugation (150,000 g)	LC-ESI-MS/MS	117
322	193	257768460101	sEV	25776846	Immunol Cell Biol. 2015 Mar 17. doi: 10.1038/icb.2015.33.	Human thymic epithelial primary cells produce exosomes carrying tissue-restricted antigens.	Eukaryote	Homo sapiens	Ex vivo	Thymus	Normal	Preclearing (850 g, 3000 g, 10,000 g) > Filtration (0.2 ??m) > Ultracentrifugation (100,000 g)	1DE-LC-ESI-MS/MS	733
323	194	257783900101	MV	25778390	Microb Pathog. 2015 Apr;81:39-45. doi: 10.1016/j.micpath.2015.03.012. Epub 2015 Mar 14.	Acinetobacter nosocomialis secretes outer membrane vesicles that induce epithelial cell death and host inflammatory responses.	Prokaryote	Acinetobacter nosocomialis	In vitro	Acinetobacter nosocomialis ATCC 17903T	Normal	Preclearing (6000 g) > Filtration (0.2 ??m) > Concentration (100 kDa) > Ultracentrifugation (150,000 g)	1DE-LC-ESI-MS/MS	109
324	195	257932580101	#N/A	25793258	PLoS Negl Trop Dis. 2015 Mar 20;9(3):e0003640. doi: 10.1371/journal.pntd.0003640. eCollection 2015 Mar.	Proteomic analysis of urine exosomes reveals renal tubule response to leptospiral colonization in experimentally infected rats.	Eukaryote	Rattus norvegicus	In vivo	Urine	Normal	Polyethylene glycol-induced precipitation	1DE-LC-ESI-MS/MS	84
325	195	257932580102	#N/A	25793258	PLoS Negl Trop Dis. 2015 Mar 20;9(3):e0003640. doi: 10.1371/journal.pntd.0003640. eCollection 2015 Mar.	Proteomic analysis of urine exosomes reveals renal tubule response to leptospiral colonization in experimentally infected rats.	Eukaryote	Rattus norvegicus	In vivo	Urine	Leptospira-infected	Polyethylene glycol-induced precipitation	1DE-LC-ESI-MS/MS	93
326	196	257988870101	sEV	25798887	PLoS One. 2015 Mar 23;10(3):e0117495. doi: 10.1371/journal.pone.0117495. eCollection 2015.	Exosomes released from breast cancer carcinomas stimulate cell movement.	Eukaryote	Homo sapiens	In vitro	Breast cancer cell (MCF-7)	Normal	Filtration (0.22 ??m) > Concentration (15 kDa) > Preclearing (2000 g, 21,000 g) > Ultracentrifugation (200,000 g)	LC-ESI-MS/MS	643
327	197	258445990101	Both	25844599	Oncotarget. 2015 Mar 12.	Molecular profiling of prostate cancer derived exosomes may reveal a predictive signature for response to docetaxel.	Eukaryote	Homo sapiens	In vitro	Prostate cancer cell (DU145)	Docetaxel-sensitive	Filtration (0.22 ??m) > Ultracentrifugation (120,000 g)	LC-ESI-MS/MS	773
328	197	258445990102	Both	25844599	Oncotarget. 2015 Mar 12.	Molecular profiling of prostate cancer derived exosomes may reveal a predictive signature for response to docetaxel.	Eukaryote	Homo sapiens	In vitro	Prostate cancer cell (DU145)	Docetaxel-resistant	Filtration (0.22 ??m) > Ultracentrifugation (120,000 g)	LC-ESI-MS/MS	497
329	198	259534840101	MV	25953484	Mol Oral Microbiol. 2015 Dec;30(6):451-73. doi: 10.1111/omi.12104. Epub 2015 Jun 16.	Outer membrane vesicles of Tannerella forsythia: biogenesis, composition, and virulence.	Prokaryote	Tannerella forsythia	In vitro	Tannerella forsythia ATCC 43037	Normal	Preclearing (10,000 g) > Filtration (0.45 ??m, 0.22 ??m) > Ultracentrifugation (100,000 g)	1DE-LC-ESI-MS/MS	175
330	199	261025360101	MV	26102536	J Proteomics. 2015 Sep 8;127(Pt B):352-64. doi: 10.1016/j.jprot.2015.06.009. Epub 2015 Jun 21.	Quantitative proteomics unravels that the post-transcriptional regulator Crc modulates the generation of vesicles and secreted virulence determinants of Pseudomonas aeruginosa.	Prokaryote	Pseudomonas aeruginosa	In vitro	Pseudomonas aeruginosa PAO1	Normal	Preclearing (7800 rpm) > Filtration (0.2 ??m) > Concentration (100 kDa) > Ultracentrifugation (100,000 g)	LC-ESI-MS/MS	489
331	199	261025360102	MV	26102536	J Proteomics. 2015 Sep 8;127(Pt B):352-64. doi: 10.1016/j.jprot.2015.06.009. Epub 2015 Jun 21.	Quantitative proteomics unravels that the post-transcriptional regulator Crc modulates the generation of vesicles and secreted virulence determinants of Pseudomonas aeruginosa.	Prokaryote	Pseudomonas aeruginosa	In vitro	Pseudomonas aeruginosa PAO1 (??crc mutant)	Normal	Preclearing (7800 rpm) > Filtration (0.2 ??m) > Concentration (100 kDa) > Ultracentrifugation (100,000 g)	LC-ESI-MS/MS	489
332	200	262015010101	MV	26201501	Proteomics. 2015 Jul 23. doi: 10.1002/pmic.201500037.	Proteomic analysis of extracellular vesicles derived from Mycobacterium tuberculosis.	Prokaryote	Mycobacterium tuberculosis	In vitro	Mycobacterium tuberculosis H37Rv	Normal	Preclearing (10,000 g) > Filtration (0.22 ??m) > Concentration (100 kDa) > Sucrose density gradient ultracentrifugation (100,000 g) > Iodixanol density gradient ultracentrifugation (200,000 g)	LC-ESI-MS/MS	287
333	201	263038780101	MV	26303878	J Proteome Res. 2015 Oct 2;14(10):4207-22. doi: 10.1021/acs.jproteome.5b00312. Epub 2015 Sep 15.	Proteome Profiles of Outer Membrane Vesicles and Extracellular Matrix of Pseudomonas aeruginosa Biofilms.	Prokaryote	Pseudomonas aeruginosa	In vitro	Pseudomonas aeruginosa PAO1	Normal_biofilm	Preclearing (12,000 g) > Filtration (1.2 ??m, 0.45 ??m, 0.22 ??m) > Ultracentrifugation (125,000 g) > Iodixanol density gradient ultracentrifugation (100,000 g) > Ultracentrifugation (125,000 g)	1) LC-ESI-MS/MS 2) 1DE-LC-ESI-MS/MS	207
334	202	263787160101	MV	26378716	J Proteome Res. 2015 Nov 6;14(11):4524-37. doi: 10.1021/acs.jproteome.5b00262. Epub 2015 Oct 2.	Tracking the Dynamic Relationship between Cellular Systems and Extracellular Subproteomes in Pseudomonas aeruginosa Biofilms.	Prokaryote	Pseudomonas aeruginosa	In vitro	Pseudomonas aerguinosa PAO1	Normal_biofilm_24 h culture	Preclearing (12,000 g) > Ultracentrifugation (150,000 g) > Filtration (0.45 ??m) > Ultracentrifugation (21,000 g)	LC-ESI-MS/MS	181
335	202	263787160102	MV	26378716	J Proteome Res. 2015 Nov 6;14(11):4524-37. doi: 10.1021/acs.jproteome.5b00262. Epub 2015 Oct 2.	Tracking the Dynamic Relationship between Cellular Systems and Extracellular Subproteomes in Pseudomonas aeruginosa Biofilms.	Prokaryote	Pseudomonas aeruginosa	In vitro	Pseudomonas aerguinosa PAO1	Normal_planktonic_24 h culture	Preclearing (12,000 g) > Ultracentrifugation (150,000 g) > Filtration (0.45 ??m) > Ultracentrifugation (21,000 g)	LC-ESI-MS/MS	189
336	202	263787160103	MV	26378716	J Proteome Res. 2015 Nov 6;14(11):4524-37. doi: 10.1021/acs.jproteome.5b00262. Epub 2015 Oct 2.	Tracking the Dynamic Relationship between Cellular Systems and Extracellular Subproteomes in Pseudomonas aeruginosa Biofilms.	Prokaryote	Pseudomonas aeruginosa	In vitro	Pseudomonas aerguinosa PAO1	Normal_biofilm_48 h culture	Preclearing (12,000 g) > Ultracentrifugation (150,000 g) > Filtration (0.45 ??m) > Ultracentrifugation (21,000 g)	LC-ESI-MS/MS	515
337	202	263787160104	MV	26378716	J Proteome Res. 2015 Nov 6;14(11):4524-37. doi: 10.1021/acs.jproteome.5b00262. Epub 2015 Oct 2.	Tracking the Dynamic Relationship between Cellular Systems and Extracellular Subproteomes in Pseudomonas aeruginosa Biofilms.	Prokaryote	Pseudomonas aeruginosa	In vitro	Pseudomonas aerguinosa PAO1	Normal_planktonic_48 h culture	Preclearing (12,000 g) > Ultracentrifugation (150,000 g) > Filtration (0.45 ??m) > Ultracentrifugation (21,000 g)	LC-ESI-MS/MS	278
338	202	263787160105	MV	26378716	J Proteome Res. 2015 Nov 6;14(11):4524-37. doi: 10.1021/acs.jproteome.5b00262. Epub 2015 Oct 2.	Tracking the Dynamic Relationship between Cellular Systems and Extracellular Subproteomes in Pseudomonas aeruginosa Biofilms.	Prokaryote	Pseudomonas aeruginosa	In vitro	Pseudomonas aerguinosa PAO1	Normal_biofilm_96 h culture	Preclearing (12,000 g) > Ultracentrifugation (150,000 g) > Filtration (0.45 ??m) > Ultracentrifugation (21,000 g)	LC-ESI-MS/MS	972
339	202	263787160106	MV	26378716	J Proteome Res. 2015 Nov 6;14(11):4524-37. doi: 10.1021/acs.jproteome.5b00262. Epub 2015 Oct 2.	Tracking the Dynamic Relationship between Cellular Systems and Extracellular Subproteomes in Pseudomonas aeruginosa Biofilms.	Prokaryote	Pseudomonas aeruginosa	In vitro	Pseudomonas aerguinosa PAO1	Normal_planktonic_96 h culture	Preclearing (12,000 g) > Ultracentrifugation (150,000 g) > Filtration (0.45 ??m) > Ultracentrifugation (21,000 g)	LC-ESI-MS/MS	279
340	203	263816550101	MV	26381655	PLoS One. 2015 Sep 18;10(9):e0138591. doi: 10.1371/journal.pone.0138591. eCollection 2015.	Proteomics of Aggregatibacter actinomycetemcomitans Outer Membrane Vesicles.	Prokaryote	Aggregatibacter actinomycetemcomitans	In vitro	Aggregatibacter actinomycetemcomitans 173	Normal	Preclearing (8000 g) > Filtration (0.22 ??m) > Ultracentrifugation (85,000 g) > Iodixanol density gradient ultracentrifugation (180,000 g)	LC-ESI-MS/MS	151
341	204	265053060101	MV	26505306	Microbiol Res. 2015 Nov;180:1-10. doi: 10.1016/j.micres.2015.06.012. Epub 2015 Jul 17.	Klebsiella pneumoniae O antigen loss alters the outer membrane protein composition and the selective packaging of proteins into secreted outer membrane vesicles.	Prokaryote	Klebsiella pneumoniae	In vitro	Klebsiella pneumoniae ATCC 43816	Normal	Preclearing (10,000 g) > Filtration (0.65 ??m, 0.4 ??m) > Concentration (100 kDa) > Iodixanol density gradient ultracentrifugation (100,000 g)	LC-ESI-MS/MS	124
342	204	265053060102	MV	26505306	Microbiol Res. 2015 Nov;180:1-10. doi: 10.1016/j.micres.2015.06.012. Epub 2015 Jul 17.	Klebsiella pneumoniae O antigen loss alters the outer membrane protein composition and the selective packaging of proteins into secreted outer membrane vesicles.	Prokaryote	Klebsiella pneumoniae	In vitro	Klebsiella pneumoniae ATCC 43816 ??wbbO	Normal	Preclearing (10,000 g) > Filtration (0.65 ??m, 0.4 ??m) > Concentration (100 kDa) > Iodixanol density gradient ultracentrifugation (100,000 g)	LC-ESI-MS/MS	171
343	205	265106190101	MV	26510619	J Proteome Res. 2015 Oct 29.	Tannerella forsythia Outer Membrane Vesicles are Enriched with Substrates of the Type IX Secretion System and TonB-dependent Receptors.	Prokaryote	Tannerella forsythia	In vitro	Tannerella forsythia ATCC 43037	Normal	Preclearing (8000 g) > Filtration (0.22 ??m) > Concentration (100 kDa) > Ultracentrifugation (100,000 g) > Iodixanol density gradient ultracentrifugation (150,000 g)	1DE-LC-ESI-MS/MS	273
344	206	268544920101	Both	26854492	J Invest Dermatol. 2016 Feb 5. pii: S0022-202X(16)00461-9. doi: 10.1016/j.jid.2015.08.001.	Fibronectin-Containing Extracellular Vesicles Protect Melanocytes Against Ultraviolet Radiation-Induced Cytotoxicity.	Eukaryote	Homo sapiens	In vitro	Melanocyte	Normal	Preclearing (500 g, 3000 g) > Ultracentrifugation (100,000 g)	1DE-LC-ESI-MS/MS	167
345	207	273204960101	sEV	27320496	J Transl Med. 2016 Jun 20;14(1):181. doi: 10.1186/s12967-016-0927-4.	Exosomes in the nose induce immune cell trafficking and harbour an altered protein cargo in chronic airway inflammation.	Eukaryote	Homo sapiens	In vivo	Nasal lavage	Normal	Preclearing (300 g, 16,500 g) > Filtration (0.2 ??m) > Ultracentrifugation (120,000 g)	SCX-LC-ESI-MS/MS	604
346	45	273332750101	sEV	27333275	PLoS One. 2016 Jun 22;11(6):e0157614. doi: 10.1371/journal.pone.0157614. eCollection 2016.	Amnion-Epithelial-Cell-Derived Exosomes Demonstrate Physiologic State of Cell under Oxidative Stress.	Eukaryote	Homo sapiens	Ex vivo	Amnion epithelial cell	Normal	Preclearing (300 g, 2000 g, 10,000 g) > Ultracentrifugation (100,000 g)	1DE-LC-ESI-MS/MS	166
347	45	273332750102	sEV	27333275	PLoS One. 2016 Jun 22;11(6):e0157614. doi: 10.1371/journal.pone.0157614. eCollection 2016.	Amnion-Epithelial-Cell-Derived Exosomes Demonstrate Physiologic State of Cell under Oxidative Stress.	Eukaryote	Homo sapiens	Ex vivo	Amnion epithelial cell	Oxidative stress	Preclearing (300 g, 2000 g, 10,000 g) > Ultracentrifugation (100,000 g)	1DE-LC-ESI-MS/MS	184
348	208	273568930101	Both	27356893	J Cell Biochem. 2016 Jun 30. doi: 10.1002/jcb.25642.	Proteomic Analysis of Exosomes and Exosome-Free Conditioned Media Derived from Human Osteosarcoma Cell Lines Reveal Differential Secretion of Proteins Related to Biological Functions and Tumor Progression.	Eukaryote	Homo sapiens	In vitro	Osteosarcoma cell (SAOS-2)	Normal	Preclearing (600 g, 2000 g, 7500 g) > Filtration (0.22 ??m) > Ultracentrifugation (100,000 g)	1DE-LC-ESI-MS/MS	2439
349	208	273568930102	Both	27356893	J Cell Biochem. 2016 Jun 30. doi: 10.1002/jcb.25642.	Proteomic Analysis of Exosomes and Exosome-Free Conditioned Media Derived from Human Osteosarcoma Cell Lines Reveal Differential Secretion of Proteins Related to Biological Functions and Tumor Progression.	Eukaryote	Homo sapiens	In vitro	Osteosarcoma cell (MG63)	Normal	Preclearing (600 g, 2000 g, 7500 g) > Filtration (0.22 ??m) > Ultracentrifugation (100,000 g)	1DE-LC-ESI-MS/MS	733
350	208	273568930103	Both	27356893	J Cell Biochem. 2016 Jun 30. doi: 10.1002/jcb.25642.	Proteomic Analysis of Exosomes and Exosome-Free Conditioned Media Derived from Human Osteosarcoma Cell Lines Reveal Differential Secretion of Proteins Related to Biological Functions and Tumor Progression.	Eukaryote	Homo sapiens	In vitro	Osteosarcoma cell (U2OS)	Normal	Preclearing (600 g, 2000 g, 7500 g) > Filtration (0.22 ??m) > Ultracentrifugation (100,000 g)	1DE-LC-ESI-MS/MS	2225
351	209	273741780101	#N/A	27374178	Oncotarget. 2016 Jun 27. doi: 10.18632/oncotarget.10307.	AHNAK enables mammary carcinoma cells to produce extracellular vesicles that increase neighboring fibroblast cell motility.	Eukaryote	Homo sapiens	In vitro	Breast cancer cell (MDA-MB-231)	Normal	Preclearing (300 g, 2000 g) > Filtration (0.8 ??m) > Preclearing (15,000 g) > Ultracentrifugation (80,000 g)	LC-ESI-MS/MS	274
352	210	274477230101	sEV	27447723	J Pathol. 2016 Jul 22. doi: 10.1002/path.4771.	Involvement of exosomes in lung inflammation associated with experimental acute pancreatitis.	Eukaryote	Rattus norvegicus	In vivo	Plasma	Acute pancreatitis	Preclearing (2000 g, 10,000 g) > Sucrose cushion ultracentrifugation (120,000 g) > Filtration (0.22 ??m) > Ultracentrifugation (120,000 g)	LC-ESI-MS/MS	191
353	211	274629210101	sEV	27462921	Oncotarget. 2016 Jul 22. doi: 10.18632/oncotarget.10783.	Procoagulant and immunogenic properties of melanoma exosomes, microvesicles and apoptotic vesicles.	Eukaryote	Mus musculus	In vitro	Melanoma cell (B16-F1)	Exosome	Preclearing (450 g, 3200 g, 25,000 g) > Filtration (0.22 ??m) > Ultracentrifugation (100,000 g) > Sucrose cushion ultracentrifugation (100,000 g)	LC-ESI-MS/MS	327
354	212	274629210102	Both	27462921	Oncotarget. 2016 Jul 22. doi: 10.18632/oncotarget.10783.	Procoagulant and immunogenic properties of melanoma exosomes, microvesicles and apoptotic vesicles.	Eukaryote	Mus musculus	In vitro	Melanoma cell (B16-F1)	Microvesicle	Preclearing (450 g, 3200 g) > Ultracentrifugation (25,000 g) > Sucrose cushion ultracentrifugation (100,000 g)	LC-ESI-MS/MS	301
355	213	274870810101	lEV	27487081	Anal Chem. 2016 Aug 3.	Comparative proteomic analysis of extracellular vesicles isolated by acoustic trapping or differential centrifugation.	Eukaryote	Homo sapiens	In vivo	Plasma	Normal	Preclearing (1600 g) > Ultracentrifugation (20,000 g)	LC-ESI-MS/MS	245
356	213	274870810102	lEV	27487081	Anal Chem. 2016 Aug 3.	Comparative proteomic analysis of extracellular vesicles isolated by acoustic trapping or differential centrifugation.	Eukaryote	Homo sapiens	In vivo	Plasma	ST-eleavated myocardial infarction	Preclearing (1600 g) > Ultracentrifugation (20,000 g)	LC-ESI-MS/MS	274
357	214	274870810103	#N/A	27487081	Anal Chem. 2016 Aug 3.	Comparative proteomic analysis of extracellular vesicles isolated by acoustic trapping or differential centrifugation.	Eukaryote	Homo sapiens	In vivo	Plasma	Normal	Capillary-based acoustic trapping	LC-ESI-MS/MS	235
358	214	274870810104	#N/A	27487081	Anal Chem. 2016 Aug 3.	Comparative proteomic analysis of extracellular vesicles isolated by acoustic trapping or differential centrifugation.	Eukaryote	Homo sapiens	In vivo	Plasma	ST-eleavated myocardial infarction	Capillary-based acoustic trapping	LC-ESI-MS/MS	243
359	215	275212150101	sEV	27521215	Oncotarget. 2016 Aug 8. doi: 10.18632/oncotarget.11111.	Modulation of paracrine signaling by CD9 positive small extracellular vesicles mediates cellular growth of androgen deprived prostate cancer.	Eukaryote	Homo sapiens	In vitro	Prostate cancer cell (DuCaP)	Dihydrotestosterone-treated	Preclearing (2000 g, 10,000 g) > Ultracentrifugation (100,000 g)	1DE-LC-ESI-MS/MS	426
360	215	275212150102	sEV	27521215	Oncotarget. 2016 Aug 8. doi: 10.18632/oncotarget.11111.	Modulation of paracrine signaling by CD9 positive small extracellular vesicles mediates cellular growth of androgen deprived prostate cancer.	Eukaryote	Homo sapiens	In vitro	Prostate cancer cell (DuCaP)	Androgen-deprived	Preclearing (2000 g, 10,000 g) > Ultracentrifugation (100,000 g)	1DE-LC-ESI-MS/MS	591
361	215	275212150103	sEV	27521215	Oncotarget. 2016 Aug 8. doi: 10.18632/oncotarget.11111.	Modulation of paracrine signaling by CD9 positive small extracellular vesicles mediates cellular growth of androgen deprived prostate cancer.	Eukaryote	Homo sapiens	In vitro	Prostate cancer cell (LNCaP)	Dihydrotestosterone-treated	Preclearing (2000 g, 10,000 g) > Ultracentrifugation (100,000 g)	1DE-LC-ESI-MS/MS	201
362	215	275212150104	sEV	27521215	Oncotarget. 2016 Aug 8. doi: 10.18632/oncotarget.11111.	Modulation of paracrine signaling by CD9 positive small extracellular vesicles mediates cellular growth of androgen deprived prostate cancer.	Eukaryote	Homo sapiens	In vitro	Prostate cancer cell (LNCaP)	Androgen-deprived	Preclearing (2000 g, 10,000 g) > Ultracentrifugation (100,000 g)	1DE-LC-ESI-MS/MS	206
363	216	275222540101	sEV	27522254	Biomaterials. 2016 Jul 6;105:195-205. doi: 10.1016/j.biomaterials.2016.07.003.	Efficient production and enhanced tumor delivery of engineered extracellular vesicles.	Eukaryote	Homo sapiens	In vitro	Embryonic kidney cell (HEK293)	Bioreactor culture	Preclearing (3000 g, 20,000 g) > Concentration (100 kDa) > Ultracentrifugation (110,000 g)	1DE-LC-ESI-MS/MS	1897
364	216	275222540102	sEV	27522254	Biomaterials. 2016 Jul 6;105:195-205. doi: 10.1016/j.biomaterials.2016.07.003.	Efficient production and enhanced tumor delivery of engineered extracellular vesicles.	Eukaryote	Homo sapiens	In vitro	Embryonic kidney cell (HEK293)	Flask culture	Preclearing (3000 g, 20,000 g) > Concentration (100 kDa) > Ultracentrifugation (110,000 g)	1DE-LC-ESI-MS/MS	2282
365	116	900000000101	#N/A	0	EVpedia submitted		Eukaryote	Homo sapiens	In vitro	Human umbilical vascular endothelial cells	Normal	Preclearing (1200 g) > Ultracentrifugation (50,000 g)	1DE-LC-ESI-MS/MS	527
366	217	259446920101	Both	25944692	Oncotarget. 2015 Apr 12.	Proteogenomic analysis reveals exosomes are more oncogenic than ectosomes.	Eukaryote	Homo sapiens	In vitro	Neuroblastoma cell (SH-SY5Y)	Exosome	Preclearing (500 g, 2000 g) > Ultracentrifugation (100,000 g) > Iodixanol density gradient ultracentrifugation (100,000 g)	1DE-LC-ESI-MS/MS	1235
367	218	259446920102	Both	25944692	Oncotarget. 2015 Apr 12.	Proteogenomic analysis reveals exosomes are more oncogenic than ectosomes.	Eukaryote	Homo sapiens	In vitro	Neuroblastoma cell (SH-SY5Y)	Ectosome	Preclearing (500 g, 2000 g) > Centrifugation (10,000 g) > Iodixanol density gradient ultracentrifugation (100,000 g)	1DE-LC-ESI-MS/MS	1398
368	219	259503830101	sEV	25950383	Pigment Cell Melanoma Res. 2015 May 7. doi: 10.1111/pcmr.12380.	Proteome characterization of melanoma exosomes reveals a specific signature for metastatic cell lines.	Eukaryote	Homo sapiens	In vitro	Melanoma cell (MNT-1)	Normal	Preclearing (3000 g, 10,000 g) > Ultracentrifugation (100,000 g) > Sucrose cushion ultracentrifugation (100,000 g)	1DE-LC-ESI-MS/MS	486
369	219	259503830102	sEV	25950383	Pigment Cell Melanoma Res. 2015 May 7. doi: 10.1111/pcmr.12380.	Proteome characterization of melanoma exosomes reveals a specific signature for metastatic cell lines.	Eukaryote	Homo sapiens	In vitro	Melanoma cell (G1)	Normal	Preclearing (3000 g, 10,000 g) > Ultracentrifugation (100,000 g) > Sucrose cushion ultracentrifugation (100,000 g)	1DE-LC-ESI-MS/MS	554
370	219	259503830103	sEV	25950383	Pigment Cell Melanoma Res. 2015 May 7. doi: 10.1111/pcmr.12380.	Proteome characterization of melanoma exosomes reveals a specific signature for metastatic cell lines.	Eukaryote	Homo sapiens	In vitro	Melanoma cell (501mel)	Normal	Preclearing (3000 g, 10,000 g) > Ultracentrifugation (100,000 g) > Sucrose cushion ultracentrifugation (100,000 g)	1DE-LC-ESI-MS/MS	561
371	219	259503830104	sEV	25950383	Pigment Cell Melanoma Res. 2015 May 7. doi: 10.1111/pcmr.12380.	Proteome characterization of melanoma exosomes reveals a specific signature for metastatic cell lines.	Eukaryote	Homo sapiens	In vitro	Melanoma cell (Daju)	Normal	Preclearing (3000 g, 10,000 g) > Ultracentrifugation (100,000 g) > Sucrose cushion ultracentrifugation (100,000 g)	1DE-LC-ESI-MS/MS	632
372	219	259503830105	sEV	25950383	Pigment Cell Melanoma Res. 2015 May 7. doi: 10.1111/pcmr.12380.	Proteome characterization of melanoma exosomes reveals a specific signature for metastatic cell lines.	Eukaryote	Homo sapiens	In vitro	Melanoma cell (SKMEL28)	Normal	Preclearing (3000 g, 10,000 g) > Ultracentrifugation (100,000 g) > Sucrose cushion ultracentrifugation (100,000 g)	1DE-LC-ESI-MS/MS	488
373	219	259503830106	sEV	25950383	Pigment Cell Melanoma Res. 2015 May 7. doi: 10.1111/pcmr.12380.	Proteome characterization of melanoma exosomes reveals a specific signature for metastatic cell lines.	Eukaryote	Homo sapiens	In vitro	Melanoma cell (A375M)	Normal	Preclearing (3000 g, 10,000 g) > Ultracentrifugation (100,000 g) > Sucrose cushion ultracentrifugation (100,000 g)	1DE-LC-ESI-MS/MS	587
374	219	259503830107	sEV	25950383	Pigment Cell Melanoma Res. 2015 May 7. doi: 10.1111/pcmr.12380.	Proteome characterization of melanoma exosomes reveals a specific signature for metastatic cell lines.	Eukaryote	Homo sapiens	In vitro	Melanoma cell (1205Lu)	Normal	Preclearing (3000 g, 10,000 g) > Ultracentrifugation (100,000 g) > Sucrose cushion ultracentrifugation (100,000 g)	1DE-LC-ESI-MS/MS	597
375	220	258902460101	Both	25890246	Methods. 2015 Apr 16. pii: S1046-2023(15)00154-1. doi: 10.1016/j.ymeth.2015.04.008.	Highly-purified exosomes and shed microvesicles isolated from the human colon cancer cell line LIM1863 by sequential centrifugal ultrafiltration are biochemically and functionally distinct.	Eukaryote	Homo sapiens	In vitro	Colorectal cancer cell (LIM1863)	Differential centrifugation_Exosomes	Preclearing (480 g, 2000 g) > Concentration (3 kDa) > Centrifugation (10,000 g) > Ultracentrifugation (100,000 g)	1DE-LC-ESI-MS/MS	449
376	221	258902460102	lEV	25890246	Methods. 2015 Apr 16. pii: S1046-2023(15)00154-1. doi: 10.1016/j.ymeth.2015.04.008.	Highly-purified exosomes and shed microvesicles isolated from the human colon cancer cell line LIM1863 by sequential centrifugal ultrafiltration are biochemically and functionally distinct.	Eukaryote	Homo sapiens	In vitro	Colorectal cancer cell (LIM1863)	Differential centrifugation_Microvesicles	Preclearing (480 g, 2000 g) > Concentration (3 kDa) > Centrifugation (10,000 g)	1DE-LC-ESI-MS/MS	640
377	222	258902460103	lEV	25890246	Methods. 2015 Apr 16. pii: S1046-2023(15)00154-1. doi: 10.1016/j.ymeth.2015.04.008.	Highly-purified exosomes and shed microvesicles isolated from the human colon cancer cell line LIM1863 by sequential centrifugal ultrafiltration are biochemically and functionally distinct.	Eukaryote	Homo sapiens	In vitro	Colorectal cancer cell (LIM1863)	Sequential centrifugal ultrafiltration_Exosomes	Preclearing (480 g, 2000 g) > Concentration (3 kDa) > Filtration (0.65 ??m) > Centrifugation (10,000 g)	1DE-LC-ESI-MS/MS	354
378	223	258902460104	Both	25890246	Methods. 2015 Apr 16. pii: S1046-2023(15)00154-1. doi: 10.1016/j.ymeth.2015.04.008.	Highly-purified exosomes and shed microvesicles isolated from the human colon cancer cell line LIM1863 by sequential centrifugal ultrafiltration are biochemically and functionally distinct.	Eukaryote	Homo sapiens	In vitro	Colorectal cancer cell (LIM1863)	Sequential centrifugal ultrafiltration_Microvesicles	Preclearing (480 g, 2000 g) > Concentration (3 kDa) > Filtration (0.65 ??m) > Filtration (0.45 ??m) > Filtration (0.22 ??m) > Filtration (0.1 ??m) > Ultracentrifugation (100,000 g)	1DE-LC-ESI-MS/MS	605
379	224	259090810101	sEV	25909081	Ann Clin Transl Neurol. 2015 Apr;2(4):353-61. doi: 10.1002/acn3.175. Epub 2015 Feb 6.	Identification of distinct circulating exosomes in Parkinson's disease.	Eukaryote	Homo sapiens	In vitro	Serum	Parkinson's disease patient	Preclearing (800 g, 1500 g, 17,000 g) > Filtration (0.2 ??m) > Ultracentrifugation (160,000 g)	LC-ESI-MS/MS	1033
380	225	261068580101	Both	26106858	Nature. 2015 Jun 24. doi: 10.1038/nature14581.	Glypican-1 identifies cancer exosomes and detects early pancreatic cancer.	Eukaryote	Mus musculus	In vitro	Fibroblast (NIH-3T3)	Normal	Preclearing (800 g, 2000 g) > Filtration (0.2 ??m) > Ultracentrifugation (100,000 g) > Sucrose cushion ultracentrifugation (210,000 g) > Ultracentrifugation (150,000 g)	LC-ESI-MS/MS	147
381	225	261068580102	Both	26106858	Nature. 2015 Jun 24. doi: 10.1038/nature14581.	Glypican-1 identifies cancer exosomes and detects early pancreatic cancer.	Eukaryote	Homo sapiens	In vitro	Mammary epithelial cell (MCF10A)	Normal	Preclearing (800 g, 2000 g) > Filtration (0.2 ??m) > Ultracentrifugation (100,000 g) > Sucrose cushion ultracentrifugation (210,000 g) > Ultracentrifugation (150,000 g)	LC-ESI-MS/MS	181
382	225	261068580103	Both	26106858	Nature. 2015 Jun 24. doi: 10.1038/nature14581.	Glypican-1 identifies cancer exosomes and detects early pancreatic cancer.	Eukaryote	Homo sapiens	In vitro	Dermal fibroblast (HDF)	Normal	Preclearing (800 g, 2000 g) > Filtration (0.2 ??m) > Ultracentrifugation (100,000 g) > Sucrose cushion ultracentrifugation (210,000 g) > Ultracentrifugation (150,000 g)	LC-ESI-MS/MS	236
383	225	261068580104	Both	26106858	Nature. 2015 Jun 24. doi: 10.1038/nature14581.	Glypican-1 identifies cancer exosomes and detects early pancreatic cancer.	Eukaryote	Mus musculus	In vitro	Lung epithelial cell (E10)	Normal	Preclearing (800 g, 2000 g) > Filtration (0.2 ??m) > Ultracentrifugation (100,000 g) > Sucrose cushion ultracentrifugation (210,000 g) > Ultracentrifugation (150,000 g)	LC-ESI-MS/MS	198
384	225	261068580105	Both	26106858	Nature. 2015 Jun 24. doi: 10.1038/nature14581.	Glypican-1 identifies cancer exosomes and detects early pancreatic cancer.	Eukaryote	Homo sapiens	In vitro	Breast cancer cell (MDA-MB-231)	Normal	Preclearing (800 g, 2000 g) > Filtration (0.2 ??m) > Ultracentrifugation (100,000 g) > Sucrose cushion ultracentrifugation (210,000 g) > Ultracentrifugation (150,000 g)	LC-ESI-MS/MS	185
385	226	272592780101	#N/A	27259278	Oncotarget. 2016 Jun 2. doi: 10.18632/oncotarget.9781.	Extracellular vesicles secreted by highly metastatic clonal variants of osteosarcoma preferentially localize to the lungs and induce metastatic behaviour in poorly metastatic clones.	Eukaryote	Homo sapiens	Ex vivo	Osteosarcoma (KHOS)	Highly metastatic clone implanted in mice	Preclearing (4000 rpm) > Filtration (0.2 ??m) > ExoQuick precipitation	1DE-LC-ESI-MS/MS	64
386	227	259853940101	sEV	25985394	Nat Cell Biol. 2015 May 18. doi: 10.1038/ncb3169.	Pancreatic cancer exosomes initiate pre-metastatic niche formation in the liver.	Eukaryote	Mus musculus	In vitro	Pancreatic cancer cell (PAN02)	Normal	Preclearing (500 g, 12,000 g) > Ultracentrifugation (100,000 g)	LC-ESI-MS/MS	1304
387	228	259859040101	sEV	25985904	J Infect Dis. 2015 May 17. pii: jiv291.	Carcinogenic liver fluke secretes extracellular vesicles that promote cholangiocytes to adopt a tumorigenic phenotype.	Eukaryote	Opisthorchis viverrini	In vitro	Excretory/secretory (ES) products	Normal	Preclearing (2000 g, 15,000 g) > Filtration (0.2 ??m) > Ultracentrifugation (110,000 g)	LC-ESI-MS/MS	108
388	229	260987140101	sEV	26098714	Acta Biochim Pol. 2015;62(2):265-72. doi: 10.18388/abp.2015_970. Epub 2015 Jun 22.	Ionizing radiation affects protein composition of exosomes secreted in vitro from head and neck squamous cell carcinoma.	Eukaryote	Homo sapiens	In vitro	Head and neck squamous cell carcinoma (FaDu)	Normal	Preclearing (2000 g, 10,000 g) > Concentration (70 kDa) > Ultracentrifugation (100,000 g)	SCX-LC-ESI-MS/MS	210
389	229	260987140102	sEV	26098714	Acta Biochim Pol. 2015;62(2):265-72. doi: 10.18388/abp.2015_970. Epub 2015 Jun 22.	Ionizing radiation affects protein composition of exosomes secreted in vitro from head and neck squamous cell carcinoma.	Eukaryote	Homo sapiens	In vitro	Head and neck squamous cell carcinoma (FaDu)	Ionizing radiation-treated	Preclearing (2000 g, 10,000 g) > Concentration (70 kDa) > Ultracentrifugation (100,000 g)	SCX-LC-ESI-MS/MS	375
390	230	261590410101	sEV	26159041	Int J Cardiol. 2015 Jun 14;197:333-347. doi: 10.1016/j.ijcard.2015.06.008.	Exosomal clusterin, identified in the pericardial fluid, improves myocardial performance following MI through epicardial activation, enhanced arteriogenesis and reduced apoptosis.	Eukaryote	Homo sapiens	In vivo	Pericardial fluid	Control	Preclearing (1200 g, 10,000 g) > Filtration (0.45 ??m, 0.22 ??m) > Ultracentrifugation (100,000 g)	LC-ESI-MS/MS	65
391	230	261590410102	sEV	26159041	Int J Cardiol. 2015 Jun 14;197:333-347. doi: 10.1016/j.ijcard.2015.06.008.	Exosomal clusterin, identified in the pericardial fluid, improves myocardial performance following MI through epicardial activation, enhanced arteriogenesis and reduced apoptosis.	Eukaryote	Homo sapiens	In vivo	Pericardial fluid	Myocardial infarction	Preclearing (1200 g, 10,000 g) > Filtration (0.45 ??m, 0.22 ??m) > Ultracentrifugation (100,000 g)	LC-ESI-MS/MS	61
392	230	261590410103	sEV	26159041	Int J Cardiol. 2015 Jun 14;197:333-347. doi: 10.1016/j.ijcard.2015.06.008.	Exosomal clusterin, identified in the pericardial fluid, improves myocardial performance following MI through epicardial activation, enhanced arteriogenesis and reduced apoptosis.	Eukaryote	Homo sapiens	In vivo	Plasma	Control	Preclearing (1200 g, 10,000 g) > Filtration (0.45 ??m, 0.22 ??m) > Ultracentrifugation (100,000 g)	LC-ESI-MS/MS	56
393	230	261590410104	sEV	26159041	Int J Cardiol. 2015 Jun 14;197:333-347. doi: 10.1016/j.ijcard.2015.06.008.	Exosomal clusterin, identified in the pericardial fluid, improves myocardial performance following MI through epicardial activation, enhanced arteriogenesis and reduced apoptosis.	Eukaryote	Homo sapiens	In vivo	Plasma	Myocardial infarction	Preclearing (1200 g, 10,000 g) > Filtration (0.45 ??m, 0.22 ??m) > Ultracentrifugation (100,000 g)	LC-ESI-MS/MS	67
394	231	261002520101	Both	26100252	Blood. 2015 Jun 22. pii: blood-2014-12-618025.	Exosomes released by chronic lymphocytic leukemia cells induce the transition of stromal cells into cancer-associated fibroblasts.	Eukaryote	Homo sapiens	In vitro	Chronic lymphoid leukemia cell (JVM-3)	Normal	Preclearing (400 g, 2000 g) > Filtration (0.45 ??m) > Ultracentrifugation (110,000 g) > Iodixanol density gradient ultracentrifugation (100,000 g) > Filtration (0.45 ??m)	LC-ESI-MS/MS	652
395	231	261002520102	Both	26100252	Blood. 2015 Jun 22. pii: blood-2014-12-618025.	Exosomes released by chronic lymphocytic leukemia cells induce the transition of stromal cells into cancer-associated fibroblasts.	Eukaryote	Homo sapiens	In vitro	Chronic lymphoid leukemia cell (MEC-1)	Normal	Preclearing (400 g, 2000 g) > Filtration (0.45 ??m) > Ultracentrifugation (110,000 g) > Iodixanol density gradient ultracentrifugation (100,000 g) > Filtration (0.45 ??m)	LC-ESI-MS/MS	1494
396	231	261002520103	Both	26100252	Blood. 2015 Jun 22. pii: blood-2014-12-618025.	Exosomes released by chronic lymphocytic leukemia cells induce the transition of stromal cells into cancer-associated fibroblasts.	Eukaryote	Homo sapiens	Ex vivo	Primary chronic lymphoid leukemia cell #1	Normal	Preclearing (400 g, 2000 g) > Filtration (0.45 ??m) > Ultracentrifugation (110,000 g) > Iodixanol density gradient ultracentrifugation (100,000 g) > Filtration (0.45 ??m)	LC-ESI-MS/MS	634
397	231	261002520104	Both	26100252	Blood. 2015 Jun 22. pii: blood-2014-12-618025.	Exosomes released by chronic lymphocytic leukemia cells induce the transition of stromal cells into cancer-associated fibroblasts.	Eukaryote	Homo sapiens	Ex vivo	Primary chronic lymphoid leukemia cell #2	Normal	Preclearing (400 g, 2000 g) > Filtration (0.45 ??m) > Ultracentrifugation (110,000 g) > Iodixanol density gradient ultracentrifugation (100,000 g) > Filtration (0.45 ??m)	LC-ESI-MS/MS	413
398	232	260987750101	sEV	26098775	Oncotarget. 2015 May 18.	Citrus limon-derived nanovesicles inhibit cancer cell proliferation and suppress CML xenograft growth by inducing TRAIL-mediated cell death.	Eukaryote	Citrus limon	In vivo	Fruit juice	Normal	Preclearing (3000 g, 10,000 g) > Filtration (0.8 ??m) > Filtration (0.45 ??m) > Centrifugation (16,500 g) > Ultracentrifugation (120,000 g) > Sucrose cushion ultracentrifugation > Ultracentrifugation	1) LC-ESI-MS/MS 2) 1DE-LC-ESI-MS/MS	580
399	233	263047900101	#N/A	26304790	Proteomics. 2015 Aug 24. doi: 10.1002/pmic.201500127.	Increased expression of lysosome membrane protein 2 in glomeruli of patients with idiopathic membranous nephropathy.	Eukaryote	Homo sapiens	In vivo	Urine	Normal	Preclearing (3000 g) > Size exclusion chromatography > Concentration (10 kDa)	SCX-LC-ESI-MS/MS	245
400	233	263047900102	#N/A	26304790	Proteomics. 2015 Aug 24. doi: 10.1002/pmic.201500127.	Increased expression of lysosome membrane protein 2 in glomeruli of patients with idiopathic membranous nephropathy.	Eukaryote	Homo sapiens	In vivo	Urine	Idiopathic membranous nephropathy	Preclearing (3000 g) > Size exclusion chromatography > Concentration (10 kDa)	SCX-LC-ESI-MS/MS	245
401	233	263047900103	#N/A	26304790	Proteomics. 2015 Aug 24. doi: 10.1002/pmic.201500127.	Increased expression of lysosome membrane protein 2 in glomeruli of patients with idiopathic membranous nephropathy.	Eukaryote	Homo sapiens	In vivo	Urine	Idiopathic focal segmental glomerulosclerosis	Preclearing (3000 g) > Size exclusion chromatography > Concentration (10 kDa)	SCX-LC-ESI-MS/MS	245
402	234	261039230101	sEV	26103923	Nat Commun. 2015 Jun 24;6:7506. doi: 10.1038/ncomms8506.	Exosomes released by keratinocytes modulate melanocyte pigmentation.	Eukaryote	Homo sapiens	In vitro	Keratinocyte	Normal	Preclearing (2000 g, 4000 g, 10,000 g) > Ultracentrifugation (100,000 g) > Iodixanol density gradient ultracentrifugation (350,000 g) > Ultracentrifugation (100,000 g)	1DE-LC-ESI-MS/MS	968
403	235	268584530101	Both	26858453	Proc Natl Acad Sci U S A. 2016 Feb 8. pii: 201521230.	Proteomic comparison defines novel markers to characterize heterogeneous populations of extracellular vesicle subtypes.	Eukaryote	Homo sapiens	In vitro	Dendritic cell	F3-10K	Preclearing (300 g, 2000 g) > Ultracentrifugation (10,000 g) > Iodixanol density gradient ultracentrifugation (350,000 g)	1DE-LC-ESI-MS/MS	1154
404	236	268584530102	sEV	26858453	Proc Natl Acad Sci U S A. 2016 Feb 8. pii: 201521230.	Proteomic comparison defines novel markers to characterize heterogeneous populations of extracellular vesicle subtypes.	Eukaryote	Homo sapiens	In vitro	Dendritic cell	F3-100K	Preclearing (300 g, 2000 g, 10,000 g) > Ultracentrifugation (100,000 g) > Iodixanol density gradient ultracentrifugation (350,000 g)	1DE-LC-ESI-MS/MS	1059
405	235	268584530103	Both	26858453	Proc Natl Acad Sci U S A. 2016 Feb 8. pii: 201521230.	Proteomic comparison defines novel markers to characterize heterogeneous populations of extracellular vesicle subtypes.	Eukaryote	Homo sapiens	In vitro	Dendritic cell	F5-10K	Preclearing (300 g, 2000 g) > Ultracentrifugation (10,000 g) > Iodixanol density gradient ultracentrifugation (350,000 g)	1DE-LC-ESI-MS/MS	1229
406	236	268584530104	sEV	26858453	Proc Natl Acad Sci U S A. 2016 Feb 8. pii: 201521230.	Proteomic comparison defines novel markers to characterize heterogeneous populations of extracellular vesicle subtypes.	Eukaryote	Homo sapiens	In vitro	Dendritic cell	F5-100K	Preclearing (300 g, 2000 g, 10,000 g) > Ultracentrifugation (100,000 g) > Iodixanol density gradient ultracentrifugation (350,000 g)	1DE-LC-ESI-MS/MS	1005
407	45	267750130101	sEV	26775013	J Proteomics. 2016 Jan 13. pii: S1874-3919(15)30214-1. doi: 10.1016/j.jprot.2015.12.016.	Proteomic characterization of circulating extracellular vesicles identifies novel serum myeloma associated markers.	Eukaryote	Homo sapiens	In vitro	B cell (MM.1R)	Normal	Preclearing (300 g, 2000 g, 10,000 g) > Ultracentrifugation (100,000 g)	LC-ESI-MS/MS	270
408	45	267750130102	sEV	26775013	J Proteomics. 2016 Jan 13. pii: S1874-3919(15)30214-1. doi: 10.1016/j.jprot.2015.12.016.	Proteomic characterization of circulating extracellular vesicles identifies novel serum myeloma associated markers.	Eukaryote	Homo sapiens	In vitro	B cell (RPMI 8226)	Normal	Preclearing (300 g, 2000 g, 10,000 g) > Ultracentrifugation (100,000 g)	LC-ESI-MS/MS	294
409	237	267750130103	sEV	26775013	J Proteomics. 2016 Jan 13. pii: S1874-3919(15)30214-1. doi: 10.1016/j.jprot.2015.12.016.	Proteomic characterization of circulating extracellular vesicles identifies novel serum myeloma associated markers.	Eukaryote	Homo sapiens	In vivo	Bone marrow aspirate	Multiple myeloma	Preclearing (300 g, 4500 g, 10,000 g) > Ultracentrifugation (100,000 g)	LC-ESI-MS/MS	312
410	237	267750130104	sEV	26775013	J Proteomics. 2016 Jan 13. pii: S1874-3919(15)30214-1. doi: 10.1016/j.jprot.2015.12.016.	Proteomic characterization of circulating extracellular vesicles identifies novel serum myeloma associated markers.	Eukaryote	Homo sapiens	In vivo	Serum	Multiple myeloma	Preclearing (300 g, 4500 g, 10,000 g) > Ultracentrifugation (100,000 g)	LC-ESI-MS/MS	235
411	237	267750130105	sEV	26775013	J Proteomics. 2016 Jan 13. pii: S1874-3919(15)30214-1. doi: 10.1016/j.jprot.2015.12.016.	Proteomic characterization of circulating extracellular vesicles identifies novel serum myeloma associated markers.	Eukaryote	Homo sapiens	In vivo	Whole blood	Healthy	Preclearing (300 g, 4500 g, 10,000 g) > Ultracentrifugation (100,000 g)	LC-ESI-MS/MS	457
412	237	267750130106	sEV	26775013	J Proteomics. 2016 Jan 13. pii: S1874-3919(15)30214-1. doi: 10.1016/j.jprot.2015.12.016.	Proteomic characterization of circulating extracellular vesicles identifies novel serum myeloma associated markers.	Eukaryote	Homo sapiens	In vivo	Leukopak	Healthy	Preclearing (300 g, 4500 g, 10,000 g) > Ultracentrifugation (100,000 g)	LC-ESI-MS/MS	290
413	238	259980410101	Both	25998041	Protein J. 2015 May 22.	Proteomic analysis of extracellular vesicles released by adipocytes of Otsuka Long-Evans Tokushima Fatty (OLETF) rats.	Eukaryote	Rattus norvegicus	Ex vivo	Adipocyte	Long-Evans Tokushima Otsuka (LETO)_1	Preclearing (300 g, 1500 g, 3000 g) > Filtration (0.2 ??m) > Ultracentrifugation (200,000 g)	LC-ESI-MS/MS	165
414	238	259980410102	Both	25998041	Protein J. 2015 May 22.	Proteomic analysis of extracellular vesicles released by adipocytes of Otsuka Long-Evans Tokushima Fatty (OLETF) rats.	Eukaryote	Rattus norvegicus	Ex vivo	Adipocyte	Long-Evans Tokushima Otsuka (LETO)_2	Preclearing (300 g, 1500 g, 3000 g) > Filtration (0.2 ??m) > Ultracentrifugation (200,000 g)	LC-ESI-MS/MS	149
415	238	259980410103	Both	25998041	Protein J. 2015 May 22.	Proteomic analysis of extracellular vesicles released by adipocytes of Otsuka Long-Evans Tokushima Fatty (OLETF) rats.	Eukaryote	Rattus norvegicus	Ex vivo	Adipocyte	Long-Evans Tokushima Otsuka (LETO)_3	Preclearing (300 g, 1500 g, 3000 g) > Filtration (0.2 ??m) > Ultracentrifugation (200,000 g)	LC-ESI-MS/MS	139
416	238	259980410104	Both	25998041	Protein J. 2015 May 22.	Proteomic analysis of extracellular vesicles released by adipocytes of Otsuka Long-Evans Tokushima Fatty (OLETF) rats.	Eukaryote	Rattus norvegicus	Ex vivo	Adipocyte	Otsuka Long-Evans Tokushima fatty (OLETF)_1	Preclearing (300 g, 1500 g, 3000 g) > Filtration (0.2 ??m) > Ultracentrifugation (200,000 g)	LC-ESI-MS/MS	257
417	238	259980410105	Both	25998041	Protein J. 2015 May 22.	Proteomic analysis of extracellular vesicles released by adipocytes of Otsuka Long-Evans Tokushima Fatty (OLETF) rats.	Eukaryote	Rattus norvegicus	Ex vivo	Adipocyte	Otsuka Long-Evans Tokushima fatty (OLETF)_2	Preclearing (300 g, 1500 g, 3000 g) > Filtration (0.2 ??m) > Ultracentrifugation (200,000 g)	LC-ESI-MS/MS	258
418	238	259980410106	Both	25998041	Protein J. 2015 May 22.	Proteomic analysis of extracellular vesicles released by adipocytes of Otsuka Long-Evans Tokushima Fatty (OLETF) rats.	Eukaryote	Rattus norvegicus	Ex vivo	Adipocyte	Otsuka Long-Evans Tokushima fatty (OLETF)_3	Preclearing (300 g, 1500 g, 3000 g) > Filtration (0.2 ??m) > Ultracentrifugation (200,000 g)	LC-ESI-MS/MS	285
419	239	260100670101	sEV	26010067	Electrophoresis. 2015 May 23. doi: 10.1002/elps.201500131.	Exosome enrichment of human serum using multiple cycles of centrifugation.	Eukaryote	Homo sapiens	In vivo	Serum	Ultracentrifugation	Preclearing (2000 g, 12,000 g) > Filtration (0.22 ??m) > Ultracentrifugation (110,000 g)	LC-ESI-MS/MS	364
420	240	260100670102	#N/A	26010067	Electrophoresis. 2015 May 23. doi: 10.1002/elps.201500131.	Exosome enrichment of human serum using multiple cycles of centrifugation.	Eukaryote	Homo sapiens	In vivo	Serum	Centrifugation	Preclearing (2000 g, 12,000 g) > Filtration (0.22 ??m) > Centrifugation (40,000 g)	LC-ESI-MS/MS	427
421	241	260184140101	MV	26018414	Mol Cell Proteomics. 2015 May 27. pii: mcp.M114.045880.	The human pathogen Streptococcus pyogenes releases lipoproteins as Lipoprotein-rich Membrane Vesicles.	Prokaryote	Streptococcus pyogenes	In vitro	Streptococcus pyogenes M1-3348	Normal	Preclearing (4000 g) > Filtration (0.22 ??m) > Ultracentrifugation (200,000 g)	1DE-LC-ESI-MS/MS	107
422	242	260249040101	sEV	26024904	Eukaryot Cell. 2015 May 29. pii: EC.00054-15.	Lipid biosynthetic genes affect Candida albicans extracellular vesicle morphology, cargo, and immunostimulatory properties.	Eukaryote	Candida albicans	In vitro	Candida albicans SC5314	Wild-type	Preclearing (4000 g, 15,000 g) > Filtration (0.45 ??m) > Concentration (100 kDa) > Ultracentrifugation (141,000 g)	LC-ESI-MS/MS	164
423	242	260249040102	sEV	26024904	Eukaryot Cell. 2015 May 29. pii: EC.00054-15.	Lipid biosynthetic genes affect Candida albicans extracellular vesicle morphology, cargo, and immunostimulatory properties.	Eukaryote	Candida albicans	In vitro	Candida albicans SC5314	??cho1	Preclearing (4000 g, 15,000 g) > Filtration (0.45 ??m) > Concentration (100 kDa) > Ultracentrifugation (141,000 g)	LC-ESI-MS/MS	197
424	242	260249040103	sEV	26024904	Eukaryot Cell. 2015 May 29. pii: EC.00054-15.	Lipid biosynthetic genes affect Candida albicans extracellular vesicle morphology, cargo, and immunostimulatory properties.	Eukaryote	Candida albicans	In vitro	Candida albicans SC5314	??cho1+cho1	Preclearing (4000 g, 15,000 g) > Filtration (0.45 ??m) > Concentration (100 kDa) > Ultracentrifugation (141,000 g)	LC-ESI-MS/MS	212
425	242	260249040104	sEV	26024904	Eukaryot Cell. 2015 May 29. pii: EC.00054-15.	Lipid biosynthetic genes affect Candida albicans extracellular vesicle morphology, cargo, and immunostimulatory properties.	Eukaryote	Candida albicans	In vitro	Candida albicans SC5314	??psd1??psd2	Preclearing (4000 g, 15,000 g) > Filtration (0.45 ??m) > Concentration (100 kDa) > Ultracentrifugation (141,000 g)	LC-ESI-MS/MS	241
426	242	260249040105	sEV	26024904	Eukaryot Cell. 2015 May 29. pii: EC.00054-15.	Lipid biosynthetic genes affect Candida albicans extracellular vesicle morphology, cargo, and immunostimulatory properties.	Eukaryote	Candida albicans	In vitro	Candida albicans SC5314	??psd1	Preclearing (4000 g, 15,000 g) > Filtration (0.45 ??m) > Concentration (100 kDa) > Ultracentrifugation (141,000 g)	LC-ESI-MS/MS	162
427	242	260249040106	sEV	26024904	Eukaryot Cell. 2015 May 29. pii: EC.00054-15.	Lipid biosynthetic genes affect Candida albicans extracellular vesicle morphology, cargo, and immunostimulatory properties.	Eukaryote	Candida albicans	In vitro	Candida albicans SC5314	??psd1??psd2+psd1	Preclearing (4000 g, 15,000 g) > Filtration (0.45 ??m) > Concentration (100 kDa) > Ultracentrifugation (141,000 g)	LC-ESI-MS/MS	179
428	243	260362100101	#N/A	26036210	Proteomics. 2015 Jun 2. doi: 10.1002/pmic.201400610.	Microparticles released from Mycobacterium tuberculosis-infected human macrophages contain increased levels of the type I interferon inducible proteins including ISG15.	Eukaryote	Homo sapiens	In vitro	Monocyte (THP-1)	Mycobacterium tuberculosis-infected_QSTAR	Preclearing (524 g, 3270 g) > Centrifugation (27,000 g)	1DE-LC-ESI-MS/MS	495
429	243	260362100102	#N/A	26036210	Proteomics. 2015 Jun 2. doi: 10.1002/pmic.201400610.	Microparticles released from Mycobacterium tuberculosis-infected human macrophages contain increased levels of the type I interferon inducible proteins including ISG15.	Eukaryote	Homo sapiens	In vitro	Monocyte (THP-1)	Normal_QSTAR	Preclearing (524 g, 3270 g) > Centrifugation (27,000 g)	1DE-LC-ESI-MS/MS	487
430	243	260362100103	#N/A	26036210	Proteomics. 2015 Jun 2. doi: 10.1002/pmic.201400610.	Microparticles released from Mycobacterium tuberculosis-infected human macrophages contain increased levels of the type I interferon inducible proteins including ISG15.	Eukaryote	Homo sapiens	In vitro	Monocyte (THP-1)	Mycobacterium tuberculosis-infected_Orbitrap	Preclearing (524 g, 3270 g) > Centrifugation (27,000 g)	1DE-LC-ESI-MS/MS	849
431	243	260362100104	#N/A	26036210	Proteomics. 2015 Jun 2. doi: 10.1002/pmic.201400610.	Microparticles released from Mycobacterium tuberculosis-infected human macrophages contain increased levels of the type I interferon inducible proteins including ISG15.	Eukaryote	Homo sapiens	In vitro	Monocyte (THP-1)	Normal_Orbitrap	Preclearing (524 g, 3270 g) > Centrifugation (27,000 g)	1DE-LC-ESI-MS/MS	1006
432	244	261546230101	#N/A	26154623	J Extracell Vesicles. 2015 Jul 6;4:27378. doi: 10.3402/jev.v4.27378. eCollection 2015.	Size-exclusion chromatography as a stand-alone methodology identifies novel markers in mass spectrometry analyses of plasma-derived vesicles from healthy individuals.	Eukaryote	Homo sapiens	In vivo	Plasma	Donor 1 (Exo-Spin)	Preclearing (2000 g, 300 g, 20,000 g) > Exo-Spin > Centrifugation (20,000 g)	LC-ESI-MS/MS	143
433	244	261546230102	#N/A	26154623	J Extracell Vesicles. 2015 Jul 6;4:27378. doi: 10.3402/jev.v4.27378. eCollection 2015.	Size-exclusion chromatography as a stand-alone methodology identifies novel markers in mass spectrometry analyses of plasma-derived vesicles from healthy individuals.	Eukaryote	Homo sapiens	In vivo	Plasma	Donor 2 (Exo-Spin)	Preclearing (2000 g, 300 g, 20,000 g) > Exo-Spin > Centrifugation (20,000 g)	LC-ESI-MS/MS	136
434	244	261546230103	#N/A	26154623	J Extracell Vesicles. 2015 Jul 6;4:27378. doi: 10.3402/jev.v4.27378. eCollection 2015.	Size-exclusion chromatography as a stand-alone methodology identifies novel markers in mass spectrometry analyses of plasma-derived vesicles from healthy individuals.	Eukaryote	Homo sapiens	In vivo	Plasma	Donor 3 (Exo-Spin)	Preclearing (2000 g, 300 g, 20,000 g) > Exo-Spin > Centrifugation (20,000 g)	LC-ESI-MS/MS	132
435	245	261546230104	#N/A	26154623	J Extracell Vesicles. 2015 Jul 6;4:27378. doi: 10.3402/jev.v4.27378. eCollection 2015.	Size-exclusion chromatography as a stand-alone methodology identifies novel markers in mass spectrometry analyses of plasma-derived vesicles from healthy individuals.	Eukaryote	Homo sapiens	In vivo	Plasma	Donor 1 (SEC fraction 7+8)	Preclearing (2000 g, 500 g) > Size-exclusion chromatography	LC-ESI-MS/MS	131
436	245	261546230105	#N/A	26154623	J Extracell Vesicles. 2015 Jul 6;4:27378. doi: 10.3402/jev.v4.27378. eCollection 2015.	Size-exclusion chromatography as a stand-alone methodology identifies novel markers in mass spectrometry analyses of plasma-derived vesicles from healthy individuals.	Eukaryote	Homo sapiens	In vivo	Plasma	Donor 1 (SEC fraction 9+10)	Preclearing (2000 g, 500 g) > Size-exclusion chromatography	LC-ESI-MS/MS	66
437	245	261546230106	#N/A	26154623	J Extracell Vesicles. 2015 Jul 6;4:27378. doi: 10.3402/jev.v4.27378. eCollection 2015.	Size-exclusion chromatography as a stand-alone methodology identifies novel markers in mass spectrometry analyses of plasma-derived vesicles from healthy individuals.	Eukaryote	Homo sapiens	In vivo	Plasma	Donor 1 (SEC fraction 11)	Preclearing (2000 g, 500 g) > Size-exclusion chromatography	LC-ESI-MS/MS	80
438	245	261546230107	#N/A	26154623	J Extracell Vesicles. 2015 Jul 6;4:27378. doi: 10.3402/jev.v4.27378. eCollection 2015.	Size-exclusion chromatography as a stand-alone methodology identifies novel markers in mass spectrometry analyses of plasma-derived vesicles from healthy individuals.	Eukaryote	Homo sapiens	In vivo	Plasma	Donor 2 (SEC fraction 9)	Preclearing (2000 g, 500 g) > Size-exclusion chromatography	LC-ESI-MS/MS	57
439	245	261546230108	#N/A	26154623	J Extracell Vesicles. 2015 Jul 6;4:27378. doi: 10.3402/jev.v4.27378. eCollection 2015.	Size-exclusion chromatography as a stand-alone methodology identifies novel markers in mass spectrometry analyses of plasma-derived vesicles from healthy individuals.	Eukaryote	Homo sapiens	In vivo	Plasma	Donor 3 (SEC fraction 8)	Preclearing (2000 g, 500 g) > Size-exclusion chromatography	LC-ESI-MS/MS	73
440	246	261624360101	MV	26162436	Amino Acids. 2015 Jul 11.	Composition of distinct sub-proteomes in Myxococcus xanthus: metabolic cost and amino acid availability.	Prokaryote	Myxococcus xanthus	In vitro	Myxococcus xanthus DK1622	Normal	Preclearing (10,400 g) > Ultracentrifugation (100,000 g) > Filtration (0.2 ??m)	LC-ESI-MS/MS	75
441	247	262904040101	sEV	26290404	J Proteome Res. 2015 Aug 20.	Global proteomic profiling of the secretome of Candida albicans ecm33 cell wall mutant reveals the involvement of Ecm33 in Sap2 secretion.	Eukaryote	Candida albicans	In vitro	Candida albicans SC5314	Wild-type	Preclearing (5524 g, 15,344 g) > Concentration (100 kDa) > Centrifugation (4000 g, 15,000 g) > Ultracentrifugation (100,000 g)	LC-ESI-MS/MS	72
442	247	262904040102	sEV	26290404	J Proteome Res. 2015 Aug 20.	Global proteomic profiling of the secretome of Candida albicans ecm33 cell wall mutant reveals the involvement of Ecm33 in Sap2 secretion.	Eukaryote	Candida albicans	In vitro	Candida albicans SC5314	??ecm33	Preclearing (5524 g, 15,344 g) > Concentration (100 kDa) > Centrifugation (4000 g, 15,000 g) > Ultracentrifugation (100,000 g)	LC-ESI-MS/MS	146
443	248	263125580101	sEV	26312558	J Proteome Res. 2015 Aug 27.	A comprehensive proteomics analysis reveals a secretory path- and status-dependent signature of exosomes released from tumor associated macrophages.	Eukaryote	Mus musculus	In vitro	Macrophage (Ana-1)	Normal	Preclearing (300 g, 16,500 g) > Filtration (0.22 ??m) > Ultracentrifugation (120,000 g) > Exo-Quick	LC-ESI-MS/MS	2380
444	248	263125580102	sEV	26312558	J Proteome Res. 2015 Aug 27.	A comprehensive proteomics analysis reveals a secretory path- and status-dependent signature of exosomes released from tumor associated macrophages.	Eukaryote	Mus musculus	In vitro	Macrophage (Ana-1)	CT26 conditioned medium-treated (tumor-associated macrophages)	Preclearing (300 g, 16,500 g) > Filtration (0.22 ??m) > Ultracentrifugation (120,000 g) > Exo-Quick	LC-ESI-MS/MS	2380
445	249	264193330101	lEV	26419333	Sci Rep. 2015 Sep 30;5:14664. doi: 10.1038/srep14664.	Extracellular vesicles are rapidly purified from human plasma by PRotein Organic Solvent PRecipitation (PROSPR).	Eukaryote	Homo sapiens	In vivo	Plasma	Protein organic solvent precipitation	Preclearing (4200 g) > Acetone precipitation > Centrifugation (3000 g)	LC-ESI-MS/MS	1497
446	250	264193330102	sEV	26419333	Sci Rep. 2015 Sep 30;5:14664. doi: 10.1038/srep14664.	Extracellular vesicles are rapidly purified from human plasma by PRotein Organic Solvent PRecipitation (PROSPR).	Eukaryote	Homo sapiens	In vivo	Plasma	Ultra-cushion	Preclearing (4200 g, 3000 g, 16,500 g) > Sucrose cushion ultracentrifugation (200,000 g) > Ultracentrifugation (200,000 g)	LC-ESI-MS/MS	562
447	251	264437220101	Both	26443722	J Extracell Vesicles. 2015 Oct 5;4:28665. doi: 10.3402/jev.v4.28665. eCollection 2015.	Protein and small non-coding RNA-enriched extracellular vesicles are released by the pathogenic blood fluke Schistosoma mansoni.	Eukaryote	Schistosoma mansoni	In vitro	Schistosoma mansoni	Normal	Preclearing (500 g, 700 g) > Ultracentrifugation (120,000 g)	LC-ESI-MS/MS	108
448	252	264602380101	Both	26460238	Int J Parasitol. 2015 Oct 13. pii: S0020-7519(15)00255-6. doi: 10.1016/j.ijpara.2015.09.002.	Extracellular vesicles secreted by Schistosoma mansoni contain protein vaccine candidates.	Eukaryote	Schistosoma mansoni	In vitro	Schistosoma mansoni	Normal	Preclearing (500 g, 2000 g, 4000 g) > Concentration (10 kDa) > Ultracentrifugation (120,000 g) > Iodixanol density gradient ultracentrifugation (120,000 g) > Concentration (10 kDa)	1DE-LC-ESI-MS/MS	79
449	253	265986470101	sEV	26598647	Mol Cell Proteomics. 2015 Nov 23. pii: mcp.M115.049718.	Osteoblast-released matrix vesicles - regulation of activity and composition by sulfated and non-sulfated glycosaminoglycans.	Eukaryote	Homo sapiens	In vitro	Bone marrow stromal cell	Normal	Preclearing (300 g, 20,000 g) > Ultracentrifugation (100,000 g)	1DE-LC-ESI-MS/MS	306
450	253	265986470102	sEV	26598647	Mol Cell Proteomics. 2015 Nov 23. pii: mcp.M115.049718.	Osteoblast-released matrix vesicles - regulation of activity and composition by sulfated and non-sulfated glycosaminoglycans.	Eukaryote	Homo sapiens	In vitro	Bone marrow stromal cell	Chondroitin sulfate-treated	Preclearing (300 g, 20,000 g) > Ultracentrifugation (100,000 g)	1DE-LC-ESI-MS/MS	306
451	253	265986470103	sEV	26598647	Mol Cell Proteomics. 2015 Nov 23. pii: mcp.M115.049718.	Osteoblast-released matrix vesicles - regulation of activity and composition by sulfated and non-sulfated glycosaminoglycans.	Eukaryote	Homo sapiens	In vitro	Bone marrow stromal cell	Non-sulfated hyaluronic acid-treated	Preclearing (300 g, 20,000 g) > Ultracentrifugation (100,000 g)	1DE-LC-ESI-MS/MS	306
452	253	265986470104	sEV	26598647	Mol Cell Proteomics. 2015 Nov 23. pii: mcp.M115.049718.	Osteoblast-released matrix vesicles - regulation of activity and composition by sulfated and non-sulfated glycosaminoglycans.	Eukaryote	Homo sapiens	In vitro	Bone marrow stromal cell	Low-sulfated hyaluronic acid-treated	Preclearing (300 g, 20,000 g) > Ultracentrifugation (100,000 g)	1DE-LC-ESI-MS/MS	306
453	45	266032570101	sEV	26603257	Clin Cancer Res. 2015 Nov 24. pii: clincanres.0654.2015.	Identification of developmental endothelial locus-1 on circulating extracellular vesicles as a novel biomarker for early breast cancer detection.	Eukaryote	Homo sapiens	In vitro	Breast cancer cell (MDA-MB-231)	Normal	Preclearing (300 g, 2000 g, 10,000 g) > Ultracentrifugation (100,000 g)	LC-ESI-MS/MS	538
454	239	266325100101	sEV	26632510	FEBS Lett. 2015 Nov 26. pii: S0014-5793(15)01049-2. doi: 10.1016/j.febslet.2015.11.036.	Commitment of Annexin A2 in recruitment of microRNAs into extracellular vesicles.	Eukaryote	Homo sapiens	In vitro	Breast cancer cell (MDA-MB-231)	Normal	Preclearing (2000 g, 12,000 g) > Filtration (0.22 ??m) > Ultracentrifugation (110,000 g)	LC-ESI-MS/MS	276
455	239	266325100102	sEV	26632510	FEBS Lett. 2015 Nov 26. pii: S0014-5793(15)01049-2. doi: 10.1016/j.febslet.2015.11.036.	Commitment of Annexin A2 in recruitment of microRNAs into extracellular vesicles.	Eukaryote	Homo sapiens	In vitro	Prostate cancer cell (PC3)	Normal	Preclearing (2000 g, 12,000 g) > Filtration (0.22 ??m) > Ultracentrifugation (110,000 g)	LC-ESI-MS/MS	67
456	254	266400460101	MV	26640046	Microbiol Res. 2015 Dec;181:1-7. doi: 10.1016/j.micres.2015.07.008. Epub 2015 Aug 1.	Protective role of E. coli outer membrane vesicles against antibiotics.	Prokaryote	Escherichia coli	In vitro	Escherichia coli MG1655	Normal	Preclearing (10,000 g) > Filtration (0.45 ??m) > Ultracentrifugation (150,000 g) > Sucrose cushion ultracentrifugation (160,000 g) > Ultracentrifugation (160,000 g)	1DE-LC-ESI-MS/MS	316
457	255	267393880101	sEV	26739388	Sci Rep. 2016 Jan 7;6:18346. doi: 10.1038/srep18346.	Exosomes as nanocarriers for systemic delivery of the Helicobacter pylori virulence factor CagA.	Eukaryote	Homo sapiens	In vivo	Serum	Normal	Preclearing (300 g, 2000 g, 10,000 g) > Ultracentrifugation (120,000 g)	1DE-LC-ESI-MS/MS	217
458	255	267393880102	sEV	26739388	Sci Rep. 2016 Jan 7;6:18346. doi: 10.1038/srep18346.	Exosomes as nanocarriers for systemic delivery of the Helicobacter pylori virulence factor CagA.	Eukaryote	Homo sapiens	In vivo	Serum	Helicobacter pylori-infected	Preclearing (300 g, 2000 g, 10,000 g) > Ultracentrifugation (120,000 g)	1DE-LC-ESI-MS/MS	507
459	256	267397630101	sEV	26739763	J Proteomics. 2015 Dec 28. pii: S1874-3919(15)30222-0. doi: 10.1016/j.jprot.2015.12.023.	Triple SILAC quantitative proteomic analysis reveals differential abundance of cell signaling proteins between normal and lung cancer-derived exosomes.	Eukaryote	Homo sapiens	In vitro	Non small cell lung cancer (HCC827)	Normal	Preclearing (2000 g, 10,000 g, 20,000 g) > PEG precipitation > Centrifugation (12,000 g) > Iodixanol density gradient ultracentrifugation (100,000 g) > Ultracentrifugation (100,000 g)	LC-ESI-MS/MS	717
460	256	267397630102	sEV	26739763	J Proteomics. 2015 Dec 28. pii: S1874-3919(15)30222-0. doi: 10.1016/j.jprot.2015.12.023.	Triple SILAC quantitative proteomic analysis reveals differential abundance of cell signaling proteins between normal and lung cancer-derived exosomes.	Eukaryote	Homo sapiens	In vitro	Non small cell lung cancer (A549)	Normal	Preclearing (2000 g, 10,000 g, 20,000 g) > PEG precipitation > Centrifugation (12,000 g) > Iodixanol density gradient ultracentrifugation (100,000 g) > Ultracentrifugation (100,000 g)	LC-ESI-MS/MS	717
461	256	267397630103	sEV	26739763	J Proteomics. 2015 Dec 28. pii: S1874-3919(15)30222-0. doi: 10.1016/j.jprot.2015.12.023.	Triple SILAC quantitative proteomic analysis reveals differential abundance of cell signaling proteins between normal and lung cancer-derived exosomes.	Eukaryote	Homo sapiens	In vitro	Normal bronchial epithelial cell (HBE4)	Normal	Preclearing (2000 g, 10,000 g, 20,000 g) > PEG precipitation > Centrifugation (12,000 g) > Iodixanol density gradient ultracentrifugation (100,000 g) > Ultracentrifugation (100,000 g)	LC-ESI-MS/MS	717
462	257	267714940101	Both	26771494	Cell. 2016 Jan 14;164(1-2):246-57. doi: 10.1016/j.cell.2015.11.051.	Extracellular vesicles from Trypanosoma brucei mediate virulence factor transfer and cause host anemia.	Eukaryote	Trypanosoma brucei	In vitro	Trypanosoma brucei brucei Lister 427	Normal	Preclearing (1200 g) > Filtration (0.2 ??m) > Ultracentrifugation (100,000 g)	LC-ESI-MS/MS	156
463	258	268488350101	lEV	26848835	PLoS One. 2016 Feb 5;11(2):e0148407. doi: 10.1371/journal.pone.0148407. eCollection 2016.	Circular RNAs co-precipitate with extracellular vesicles: a possible mechanism for circRNA clearance.	Eukaryote	Homo sapiens	In vitro	Cervical cancer (HeLa)	Normal	Preclearing (3000 g) > ExoQuik > Centrifugation (1500 g)	LC-ESI-MS/MS	242
464	258	268488350102	lEV	26848835	PLoS One. 2016 Feb 5;11(2):e0148407. doi: 10.1371/journal.pone.0148407. eCollection 2016.	Circular RNAs co-precipitate with extracellular vesicles: a possible mechanism for circRNA clearance.	Eukaryote	Homo sapiens	In vitro	Embryonic kidney cells (293T)	Normal	Preclearing (3000 g) > ExoQuik > Centrifugation (1500 g)	LC-ESI-MS/MS	226
465	258	268488350103	lEV	26848835	PLoS One. 2016 Feb 5;11(2):e0148407. doi: 10.1371/journal.pone.0148407. eCollection 2016.	Circular RNAs co-precipitate with extracellular vesicles: a possible mechanism for circRNA clearance.	Eukaryote	Homo sapiens	In vitro	Osteosarcoma (U-2 OS)	Normal	Preclearing (3000 g) > ExoQuik > Centrifugation (1500 g)	LC-ESI-MS/MS	231
466	259	268848410101	sEV	26884841	Int J Clin Exp Pathol. 2015 Dec 1;8(12):15719-28. eCollection 2015.	Exosomes mediated pentose phosphate pathway in ovarian cancer metastasis: a proteomics analysis.	Eukaryote	Homo sapiens	In vitro	Ovarian cancer (HO-8910PM)	Normal	Preclearing (3000 g, 20,000 g) > Ultracentrifugation (120,000 g)	1DE-LC-ESI-MS/MS	1329
467	259	268848410102	sEV	26884841	Int J Clin Exp Pathol. 2015 Dec 1;8(12):15719-28. eCollection 2015.	Exosomes mediated pentose phosphate pathway in ovarian cancer metastasis: a proteomics analysis.	Eukaryote	Homo sapiens	In vitro	Ovarian cancer (OVCA429)	Normal	Preclearing (3000 g, 20,000 g) > Ultracentrifugation (120,000 g)	1DE-LC-ESI-MS/MS	1330
468	120	269190980101	sEV	26919098	Oncotarget. 2016 Feb 22. doi: 10.18632/oncotarget.7573.	Oncogenic epithelial cell-derived exosomes containing Rac1 and PAK2 induce angiogenesis in recipient endothelial cells.	Eukaryote	Canis lupus familiaris	In vitro	Kidney epithelial cell (MDCK)	Normal	Preclearing (480 g, 2000 g, 10,000 g) > Ultracentrifugation (100,000 g) > Iodixanol density gradient ultracentrifugation (100,000 g) > Ultracentrifugation (100,000 g)	1DE-LC-ESI-MS/MS	764
469	120	269190980102	sEV	26919098	Oncotarget. 2016 Feb 22. doi: 10.18632/oncotarget.7573.	Oncogenic epithelial cell-derived exosomes containing Rac1 and PAK2 induce angiogenesis in recipient endothelial cells.	Eukaryote	Canis lupus familiaris	In vitro	Kidney epithelial cell (MDCK-YBX1)	Normal	Preclearing (480 g, 2000 g, 10,000 g) > Ultracentrifugation (100,000 g) > Iodixanol density gradient ultracentrifugation (100,000 g) > Ultracentrifugation (100,000 g)	1DE-LC-ESI-MS/MS	554
470	120	269190980103	sEV	26919098	Oncotarget. 2016 Feb 22. doi: 10.18632/oncotarget.7573.	Oncogenic epithelial cell-derived exosomes containing Rac1 and PAK2 induce angiogenesis in recipient endothelial cells.	Eukaryote	Canis lupus familiaris	In vitro	Kidney epithelial cell (21D1)	Normal	Preclearing (480 g, 2000 g, 10,000 g) > Ultracentrifugation (100,000 g) > Iodixanol density gradient ultracentrifugation (100,000 g) > Ultracentrifugation (100,000 g)	1DE-LC-ESI-MS/MS	475
471	192	269247950101	MV	26924795	Microb Pathog. 2016 Feb 25. pii: S0882-4010(16)30044-4. doi: 10.1016/j.micpath.2016.02.014.	Variation among Staphylococcus aureus membrane vesicle proteomes affects cytotoxicity of host cells.	Prokaryote	Staphylococcus aureus	In vitro	Staphylococcus aureus 03ST17	Normal	Preclearing (6000 g) > Filtration (0.22 ??m) > Concentration (100 kDa) > Ultracentrifugation (150,000 g)	1DE-LC-ESI-MS/MS	144
472	192	269247950102	MV	26924795	Microb Pathog. 2016 Feb 25. pii: S0882-4010(16)30044-4. doi: 10.1016/j.micpath.2016.02.014.	Variation among Staphylococcus aureus membrane vesicle proteomes affects cytotoxicity of host cells.	Prokaryote	Staphylococcus aureus	In vitro	Staphylococcus aureus 06ST1048	Normal	Preclearing (6000 g) > Filtration (0.22 ??m) > Concentration (100 kDa) > Ultracentrifugation (150,000 g)	1DE-LC-ESI-MS/MS	146
473	192	269247950103	MV	26924795	Microb Pathog. 2016 Feb 25. pii: S0882-4010(16)30044-4. doi: 10.1016/j.micpath.2016.02.014.	Variation among Staphylococcus aureus membrane vesicle proteomes affects cytotoxicity of host cells.	Prokaryote	Staphylococcus aureus	In vitro	Staphylococcus aureus M060	Normal	Preclearing (6000 g) > Filtration (0.22 ??m) > Concentration (100 kDa) > Ultracentrifugation (150,000 g)	1DE-LC-ESI-MS/MS	154
474	260	269286720101	#N/A	26928672	J Extracell Vesicles. 2016 Feb 24;5:29828. doi: 10.3402/jev.v5.29828. eCollection 2016.	MSC secretes at least 3 EV types each with a unique permutation of membrane lipid, protein and RNA.	Eukaryote	Homo sapiens	In vitro	Mesenchymal stem cell	Cholera toxin B-bound	Preclearing (500 g) > Filtration (0.22 ??m) > Concentration (100 kDa) > Filtration (0.22 ??m) >Gel filtration > Binding with cholera toxin B	LC-ESI-MS/MS	1800
475	260	269286720102	#N/A	26928672	J Extracell Vesicles. 2016 Feb 24;5:29828. doi: 10.3402/jev.v5.29828. eCollection 2016.	MSC secretes at least 3 EV types each with a unique permutation of membrane lipid, protein and RNA.	Eukaryote	Homo sapiens	In vitro	Mesenchymal stem cell	Cholera toxin B-depleted	Preclearing (500 g) > Filtration (0.22 ??m) > Concentration (100 kDa) > Filtration (0.22 ??m) >Gel filtration > Binding with cholera toxin B	LC-ESI-MS/MS	1539
476	261	269302820101	MV	26930282	PLoS One. 2016 Mar 1;11(3):e0149132. doi: 10.1371/journal.pone.0149132. eCollection 2016.	Characterization and vaccine potential of outer membrane vesicles produced by Haemophilus parasuis.	Prokaryote	Haemophilus parasuis	In vitro	Haemophilus parasuis D74	Liquid	Preclearing (7500 g) > Filtration (0.22 ??m) > Ultracentrifugation (110,000 g) > Iodixanol density gradient ultracentrifugation (100,000 g) > Ultracentrifugation (110,000 g)	LC-ESI-MS/MS	83
477	262	269302820102	MV	26930282	PLoS One. 2016 Mar 1;11(3):e0149132. doi: 10.1371/journal.pone.0149132. eCollection 2016.	Characterization and vaccine potential of outer membrane vesicles produced by Haemophilus parasuis.	Prokaryote	Haemophilus parasuis	In vitro	Haemophilus parasuis D74	Plate	Preclearing (7500 g, 10,000 g) > Filtration (0.22 ??m) > Ultracentrifugation (110,000 g) > Iodixanol density gradient ultracentrifugation (100,000 g) > Ultracentrifugation (110,000 g)	LC-ESI-MS/MS	240
478	263	269318250101	lEV	26931825	Sci Rep. 2016 Mar 2;6:22519. doi: 10.1038/srep22519.	Cells release subpopulations of exosomes with distinct molecular and biological properties.	Eukaryote	Mus musculus	In vitro	Melanoma (B16F10)	Microvesicles	Preclearing (2000 g) > Centrifugation (10,000 g)	LC-ESI-MS/MS	2851
479	264	269318250102	sEV	26931825	Sci Rep. 2016 Mar 2;6:22519. doi: 10.1038/srep22519.	Cells release subpopulations of exosomes with distinct molecular and biological properties.	Eukaryote	Mus musculus	In vitro	Melanoma (B16F10)	Low density exosomes	Preclearing (2000 g, 10,000 g) > Ultracentrifugation (110,000 g) > Sucrose density gradient ultracentrifugation (200,000 g)	LC-ESI-MS/MS	2802
480	264	269318250103	sEV	26931825	Sci Rep. 2016 Mar 2;6:22519. doi: 10.1038/srep22519.	Cells release subpopulations of exosomes with distinct molecular and biological properties.	Eukaryote	Mus musculus	In vitro	Melanoma (B16F10)	High density exosomes	Preclearing (2000 g, 10,000 g) > Ultracentrifugation (110,000 g) > Sucrose density gradient ultracentrifugation (200,000 g)	LC-ESI-MS/MS	1848
481	265	269623040101	MV	26962304	Clin Proteomics. 2016 Mar 9;13:6. doi: 10.1186/s12014-016-9107-z. eCollection 2016.	Extracellular vesicle proteomes reflect developmental phases of Bacillus subtilis.	Prokaryote	Bacillus subtilis	In vitro	Bacillus subtilis 168	Vegetative	Preclearing (10,000 g) > Filtration (0.22 ??m) > Ultracentrifugation (150,000 g) > Concentration (100 kDa)	LC-ESI-MS/MS	150
482	265	269623040102	MV	26962304	Clin Proteomics. 2016 Mar 9;13:6. doi: 10.1186/s12014-016-9107-z. eCollection 2016.	Extracellular vesicle proteomes reflect developmental phases of Bacillus subtilis.	Prokaryote	Bacillus subtilis	In vitro	Bacillus subtilis 168	Sporulating	Preclearing (10,000 g) > Filtration (0.22 ??m) > Ultracentrifugation (150,000 g) > Concentration (100 kDa)	LC-ESI-MS/MS	100
483	266	270503720101	sEV	27050372	Oncotarget. 2016 Mar 30. doi: 10.18632/oncotarget.8483.	Curcumin modulates chronic myelogenous leukemia exosomes composition and affects angiogenic phenotype, via exosomal miR-21.	Eukaryote	Homo sapiens	In vitro	Chronic myeloid leukemia (K562)	Normal	Preclearing (300 g, 2000 g, 10,000 g) > Ultracentrifugation (100,000 g) > Sucrose density gradient ultracentrifugation (100,000 g)	LC-ESI-MS/MS	173
484	266	270503720102	sEV	27050372	Oncotarget. 2016 Mar 30. doi: 10.18632/oncotarget.8483.	Curcumin modulates chronic myelogenous leukemia exosomes composition and affects angiogenic phenotype, via exosomal miR-21.	Eukaryote	Homo sapiens	In vitro	Chronic myeloid leukemia (K562)	Curcumin-treated	Preclearing (300 g, 2000 g, 10,000 g) > Ultracentrifugation (100,000 g) > Sucrose density gradient ultracentrifugation (100,000 g)	LC-ESI-MS/MS	173
485	267	270684790101	Both	27068479	Sci Rep. 2016 Apr 12;6:23978. doi: 10.1038/srep23978.	ExtraPEG: a polyethylene glycol-based method for enrichment of extracellular vesicles.	Eukaryote	Homo sapiens	In vitro	Cervical cancer (HeLa)	Normal	Preclearing (500 g, 2000 g) > PEG precipitation > Centrifugation (3214 g) > Ultracentrifugation (100,000 g)	1DE-LC-ESI-MS/MS	519
486	268	270869120101	sEV	27086912	Oncotarget. 2016 Apr 11. doi: 10.18632/oncotarget.8678.	Comparative proteomics of exosomes secreted by tumoral Jurkat T cells and normal human T cell blasts unravels a potential tumorigenic role for valosin-containing protein.	Eukaryote	Homo sapiens	In vivo	T cell blasts	Normal	Preclearing (300 g, 1800 g, 10,000 g) > Ultracentrifugation (110,000 g)	LC-ESI-MS/MS	303
487	268	270869120102	sEV	27086912	Oncotarget. 2016 Apr 11. doi: 10.18632/oncotarget.8678.	Comparative proteomics of exosomes secreted by tumoral Jurkat T cells and normal human T cell blasts unravels a potential tumorigenic role for valosin-containing protein.	Eukaryote	Homo sapiens	In vitro	T cell (Jurkat)	Normal	Preclearing (300 g, 1800 g, 10,000 g) > Ultracentrifugation (110,000 g)	LC-ESI-MS/MS	385
488	269	270910800101	lEV	27091080	Sci Rep. 2016 Apr 19;6:24669. doi: 10.1038/srep24669.	Facile preparation of salivary extracellular vesicles for cancer proteomics.	Eukaryote	Homo sapiens	In vivo	Saliva	Normal_conventional method	Preclearing (2600 g) > Filtration (5 ??m) > Centrifugation (20,000 g)	LC-ESI-MS/MS	55
489	270	270910800102	lEV	27091080	Sci Rep. 2016 Apr 19;6:24669. doi: 10.1038/srep24669.	Facile preparation of salivary extracellular vesicles for cancer proteomics.	Eukaryote	Homo sapiens	In vivo	Saliva	Normal_affinity chromatography coupled with filter system	Preclearing (2600 g) > Filtration (5 ??m) > Affinity chromatography coupled with filter system > Centrifugation (20,000 g)	LC-ESI-MS/MS	95
490	270	270910800103	lEV	27091080	Sci Rep. 2016 Apr 19;6:24669. doi: 10.1038/srep24669.	Facile preparation of salivary extracellular vesicles for cancer proteomics.	Eukaryote	Homo sapiens	In vivo	Saliva	Lung cancer_affinity chromatography coupled with filter system	Preclearing (2600 g) > Filtration (5 ??m) > Affinity chromatography coupled with filter system > Centrifugation (20,000 g)	LC-ESI-MS/MS	113
491	271	271023790101	MV	27102379	Environ Microbiol. 2016 Apr 21. doi: 10.1111/1462-2920.13344.	Outer membrane vesicles containing signaling molecules and active hydrolytic enzymes released by a coral pathogen Vibrio shilonii AK1.	Prokaryote	Vibrio shilonii	In vitro	Vibrio shilonii AK1	20oC	Preclearing (7025 g) > Filtration (0.22 ??m) > Concentration (100 kDa) > Ultracentrifugation (100,000 g) > Iodixanol density gradient ultracentrifugation (111,132 g) > Ultracentrifugation (100,000 g)	1DE-LC-ESI-MS/MS	1331
492	271	271023790102	MV	27102379	Environ Microbiol. 2016 Apr 21. doi: 10.1111/1462-2920.13344.	Outer membrane vesicles containing signaling molecules and active hydrolytic enzymes released by a coral pathogen Vibrio shilonii AK1.	Prokaryote	Vibrio shilonii	In vitro	Vibrio shilonii AK1	30oC	Preclearing (7025 g) > Filtration (0.22 ??m) > Concentration (100 kDa) > Ultracentrifugation (100,000 g) > Iodixanol density gradient ultracentrifugation (111,132 g) > Ultracentrifugation (100,000 g)	1DE-LC-ESI-MS/MS	814
493	272	271728810101	#N/A	27172881	Sci Rep. 2016 May 13;6:25885. doi: 10.1038/srep25885.	Molecular characterization of S. japonicum exosome-like vesicles reveals their regulatory roles in parasite-host interactions.	Eukaryote	Schistosoma japonicum	In vitro	Schistosoma japonicum	Normal	Preclearing (2000 g, 14,000 g) > Dialysis > Concentration (3.5 kDa) > Filtration (0.22 ??m) > Total Exosome Isolation kit > Centrifugation (14,000 g)	LC-ESI-MS/MS	402
494	273	271855510101	MV	27185551	J Proteomics. 2016 May 9. pii: S1874-3919(16)30187-7. doi: 10.1016/j.jprot.2016.05.001.	Proteomic analysis of outer membrane proteins and vesicles of a clinical isolate and a collection strain of Stenotrophomonas maltophilia.	Prokaryote	Stenotrophomonas maltophilia	In vitro	Stenotrophomonas maltophilia ATCC13637	Normal	Preclearing (6000 g) > Filtration (0.45 ??m) > Centrifugation (20,000 g, 40,000 g) > Ultracentrifugation (150,000 g) > Sucrose density gradient ultracentrifugation (200,000 g)	1DE-LC-ESI-MS/MS	264
495	273	271855510102	MV	27185551	J Proteomics. 2016 May 9. pii: S1874-3919(16)30187-7. doi: 10.1016/j.jprot.2016.05.001.	Proteomic analysis of outer membrane proteins and vesicles of a clinical isolate and a collection strain of Stenotrophomonas maltophilia.	Prokaryote	Stenotrophomonas maltophilia	In vitro	Stenotrophomonas maltophilia M30	Normal	Preclearing (6000 g) > Filtration (0.45 ??m) > Centrifugation (20,000 g, 40,000 g) > Ultracentrifugation (150,000 g) > Sucrose density gradient ultracentrifugation (200,000 g)	1DE-LC-ESI-MS/MS	133
496	274	272161850101	sEV	27216185	Cancer Res. 2016 May 23. pii: canres.0651.2016.	Adipocyte exosomes promote melanoma aggressiveness through fatty acid oxidation: a novel mechanism linking obesity and cancer.	Eukaryote	Mus musculus	In vitro	Adipocyte (3T3-F442A)	Normal	Preclearing (3000 g, 10,000 g) > Ultracentrifugation (100,000 g)	1DE-LC-ESI-MS/MS	322
497	275	272164970101	#N/A	27216497	Mol Neurodegener. 2016 May 23;11(1):41. doi: 10.1186/s13024-016-0108-1.	Enrichment of extracellular vesicles from tissues of the central nervous system by PROSPR.	Eukaryote	Homo sapiens	In vivo	Brain	Normal	Homogenization > Preclearing (15,000 g) > Protein organic solvent precipitation	LC-ESI-MS/MS	2751
498	275	272164970102	#N/A	27216497	Mol Neurodegener. 2016 May 23;11(1):41. doi: 10.1186/s13024-016-0108-1.	Enrichment of extracellular vesicles from tissues of the central nervous system by PROSPR.	Eukaryote	Mus musculus	In vivo	Brain	Normal	Homogenization > Preclearing (15,000 g) > Protein organic solvent precipitation	LC-ESI-MS/MS	464
499	276	272294430101	lEV	27229443	Analyst. 2016 May 27.	Effective isolation of exosomes with polyethylene glycol from cell culture supernatant for in-depth proteome profiling.	Eukaryote	Homo sapiens	In vitro	Cervical cancer (HeLa)	Normal	Preclearing (500 g, 3000 g) > Filtration (0.22 ??m) > PEG precipitation > Centrifugation (3000 g)	LC-ESI-MS/MS	5146
500	277	272469260101	#N/A	27246926	Vet Res. 2016 May 31;47(1):59. doi: 10.1186/s13567-016-0345-x.	Serum-derived exosomes from non-viremic animals previously exposed to the porcine respiratory and reproductive virus contain antigenic viral proteins.	Eukaryote	Sus scrofa	In vivo	Serum	Normal	Preclearing (500 g) > Size exclusion chromatography	LC-ESI-MS/MS	180
501	278	273020450101	#N/A	27302045	Nat Commun. 2016 Jun 15;7:11958. doi: 10.1038/ncomms11958.	Microvesicles provide a mechanism for intercellular communication by embryonic stem cells during embryo implantation.	Eukaryote	Mus musculus	In vitro	Embryonic stem cell (E14tg2a.4)	Normal	Preclearing (300 g, 3000 g) > Concentration (10 kDa) > Filtration (0.22 ??m)	LC-ESI-MS/MS	1172
502	279	273037290101	Both	27303729	mSphere. 2016 Mar 30;1(2). pii: e00085-15. doi: 10.1128/mSphere.00085-15. eCollection 2016 Mar-Apr.	Antibody binding alters the characteristics and contents of extracellular vesicles released by Histoplasma capsulatum.	Eukaryote	Histoplasma capsulatum	In vitro	Histoplasma capsulatum ATCC G217B	Normal	Preclearing (3000 rpm) > Filtration (0.45 ??m) > Concentration (100 kDa) > Ultracentrifugation (152,813 g)	LC-ESI-MS/MS	1126
503	280	252421460101	Both	25242146	Mol Cell. 2014 Sep 16. pii: S1097-2765(14)00675-3. doi: 10.1016/j.molcel.2014.08.020.	Extracellular Vesicles from Neural Stem Cells Transfer IFN-gamma via Ifngr1 to Activate Stat1 Signaling in Target Cells.	Eukaryote	Mus musculus	Ex vivo	Neural stem/precursor cell (NPC)	Th1 cytokine-treated	Preclearing (300 g, 1000 g) > Ultracentrifugation (100,000 g) > Sucrose cushion ultracentrifugation (100,000 g) > Ultracentrifugation (100,000 g)	1DE-LC-ESI-MS/MS	913
504	280	252421460102	Both	25242146	Mol Cell. 2014 Sep 16. pii: S1097-2765(14)00675-3. doi: 10.1016/j.molcel.2014.08.020.	Extracellular Vesicles from Neural Stem Cells Transfer IFN-gamma via Ifngr1 to Activate Stat1 Signaling in Target Cells.	Eukaryote	Mus musculus	Ex vivo	Neural stem/precursor cell (NPC)	Th2 cytokine-treated	Preclearing (300 g, 1000 g) > Ultracentrifugation (100,000 g) > Sucrose cushion ultracentrifugation (100,000 g) > Ultracentrifugation (100,000 g)	1DE-LC-ESI-MS/MS	892
505	45	252653330101	sEV	25265333	J Proteome Res. 2014 Oct 8.	Quantitative Proteomic Analysis of Exosome Protein Content Changes Induced by Hepatitis B Virus in Huh-7 Cells Using SILAC Labeling and LC-MS/MS.	Eukaryote	Homo sapiens	In vitro	Hepatoma cell (Huh-7)	pCMV-transfected	Preclearing (300 g, 2000 g, 10,000 g) > Ultracentrifugation (100,000 g)	1DE-LC-ESI-MS/MS	326
506	45	252653330102	sEV	25265333	J Proteome Res. 2014 Oct 8.	Quantitative Proteomic Analysis of Exosome Protein Content Changes Induced by Hepatitis B Virus in Huh-7 Cells Using SILAC Labeling and LC-MS/MS.	Eukaryote	Homo sapiens	In vitro	Hepatoma cell (Huh-7)	pCMV-HA-HBx-transfected	Preclearing (300 g, 2000 g, 10,000 g) > Ultracentrifugation (100,000 g)	1DE-LC-ESI-MS/MS	213
507	45	252653330103	sEV	25265333	J Proteome Res. 2014 Oct 8.	Quantitative Proteomic Analysis of Exosome Protein Content Changes Induced by Hepatitis B Virus in Huh-7 Cells Using SILAC Labeling and LC-MS/MS.	Eukaryote	Homo sapiens	In vitro	Hepatoma cell (Huh-7)	pCMV-HBV1.1-transfected	Preclearing (300 g, 2000 g, 10,000 g) > Ultracentrifugation (100,000 g)	1DE-LC-ESI-MS/MS	265
508	45	252653330104	sEV	25265333	J Proteome Res. 2014 Oct 8.	Quantitative Proteomic Analysis of Exosome Protein Content Changes Induced by Hepatitis B Virus in Huh-7 Cells Using SILAC Labeling and LC-MS/MS.	Eukaryote	Homo sapiens	In vitro	Hepatoma cell (Huh-7)	pCMV-HBV1.1(X')-transfected	Preclearing (300 g, 2000 g, 10,000 g) > Ultracentrifugation (100,000 g)	1DE-LC-ESI-MS/MS	265
509	281	252713000101	sEV	25271300	Mol Cell Proteomics. 2014 Sep 30. pii: mcp.M114.041194.	Proteome-metabolome profiling of ovarian cancer ascites reveals novel components involved in intercellular communication.	Eukaryote	Homo sapiens	In vitro	Ovarian cancer cell (SKOV3)	Normal	Preclearing (2000 g, 16,000 g) > Ultracentrifugation (120,000 g)	LC-ESI-MS/MS	75
510	282	253321130101	sEV	25332113	Transfusion. 2014 Oct 21. doi: 10.1111/trf.12874.	Lipidomic and proteomic characterization of platelet extracellular vesicle subfractions from senescent platelets.	Eukaryote	Homo sapiens	In vitro	Platelet	Exosomes	Preclearing (1500 g, 13,000 g) > Filtration (1.0 ??m) > Preclearing (20,000 g) > Ultracentrifugation (120,000 g) > Iodixanol density gradient ultracentrifugation (100,000 g) > Ultracentrifugation (120,000 g)	LC-ESI-MS/MS	967
511	283	253321130102	sEV	25332113	Transfusion. 2014 Oct 21. doi: 10.1111/trf.12874.	Lipidomic and proteomic characterization of platelet extracellular vesicle subfractions from senescent platelets.	Eukaryote	Homo sapiens	In vitro	Platelet	Microvesicles	Preclearing (1500 g, 13,000 g) > Filtration (1.0 ??m) > Ultracentrifugation (20,000 g) > Iodixanol density gradient ultracentrifugation (38,000 g) > Ultracentrifugation (120,000 g)	LC-ESI-MS/MS	1457
512	3	253652300101	sEV	25365230	J Proteome Res. 2014 Nov 12.	A New Workflow for Proteomic Analysis of Urinary Exosomes and Assessment in Cystinuria Patients.	Eukaryote	Homo sapiens	In vitro	Urine	Cystinuria patients, molecular weight fractionation	Preclearing (17,000 g) > Ultracentrifugation (200,000 g)	LC-ESI-MS/MS	604
513	3	253652300102	sEV	25365230	J Proteome Res. 2014 Nov 12.	A New Workflow for Proteomic Analysis of Urinary Exosomes and Assessment in Cystinuria Patients.	Eukaryote	Homo sapiens	In vitro	Urine	Cystinuria patients, pI fractionation	Preclearing (17,000 g) > Ultracentrifugation (200,000 g)	LC-ESI-MS/MS	1197
514	247	253676580101	sEV	25367658	J Proteome Res. 2014 Nov 12.	Proteomics Unravels Extracellular Vesicles as Carriers of Classical Cytoplasmic Proteins in Candida albicans.	Eukaryote	Candida albicans	In vitro	Candida albicans SC5314	Normal	Preclearing (5524 g, 15,344 g) > Concentration (100 kDa) > Centrifugation (4000 g, 15,000 g) > Ultracentrifugation (100,000 g)	LC-ESI-MS/MS	74
515	284	254455840101	MV	25445584	Biochem Biophys Res Commun. 2014 Oct 31;453(4):696-702. doi: 10.1016/j.bbrc.2014.09.142. Epub 2014 Oct 14.	Comparative proteomic analysis of outer membrane vesicles from Shigella flexneri under different culture conditions.	Prokaryote	Shigella flexneri	In vitro	Shigella flexneri 2a str. 301	Normal	Preclearing (20,000 g, 40,000 g) > Filtration (0.45 ??m) > Filtration (0.2 ??m) > Ultracentrifugation (150,000 g)	LC-ESI-MS/MS	146
516	285	254691100101	sEV	25469110	Clin Proteomics. 2014 Nov 19;11(1):40. eCollection 2014.	Proteomic analysis of human placental syncytiotrophoblast microvesicles in preeclampsia.	Eukaryote	Homo sapiens	Ex vivo	Placental villous tissue	Preeclampsia patients	Preclearing (1000 g, 10,000 g) > Ultracentrifugation (100,000 g)	1DE-LC-ESI-MS/MS	417
517	286	254702500101	sEV	25470250	PLoS One. 2014 Dec 3;9(12):e113651. doi: 10.1371/journal.pone.0113651. eCollection 2014.	Circulating Extracellular Vesicles with Specific Proteome and Liver MicroRNAs Are Potential Biomarkers for Liver Injury in Experimental Fatty Liver Disease.	Eukaryote	Mus musculus	In vivo	Blood	Choline supplemented L-amino acid (CSAA)-fed	Preclearing (1200 g, 12,000 g, 20,000 g) > Ultracentrifugation (100,000 g)	LC-ESI-MS/MS	63
518	287	254712070101	#N/A	25471207	Proteomics Clin Appl. 2014 Dec 4. doi: 10.1002/prca.201400085.	Intraluminal proteome and peptidome of human urinary extracellular vesicles.	Eukaryote	Homo sapiens	In vivo	Urine	Normal	Preclearing (2000 g) > Concentration (1000 kDa) > Hydrostatic filtration diaylsis (1000 kDa)	LC-ESI-MS/MS	941
519	288	267465810101	MV	26746581	Int J Med Microbiol. 2015 Dec 23. pii: S1438-4221(15)30025-4. doi: 10.1016/j.ijmm.2015.12.003.	Quantitative proteomic analysis of Shigella flexneri and Shigella sonnei Generalized Modules for Membrane Antigens (GMMA) reveals highly pure preparations.	Prokaryote	Shigella flexneri	In vitro	Shigella flexneri 2a 2457T	Normal	Preclearing (5000 g) > Filtration (0.22 ??m) > Concentration (100 kDa) > Ultracentrifugation (186,000 g) > Filtration (0.22 ??m)	1DE-LC-ESI-MS/MS	514
520	288	267465810102	MV	26746581	Int J Med Microbiol. 2015 Dec 23. pii: S1438-4221(15)30025-4. doi: 10.1016/j.ijmm.2015.12.003.	Quantitative proteomic analysis of Shigella flexneri and Shigella sonnei Generalized Modules for Membrane Antigens (GMMA) reveals highly pure preparations.	Prokaryote	Shigella sonnei	In vitro	Shigella sonnei 53G	Normal	Preclearing (5000 g) > Filtration (0.22 ??m) > Concentration (100 kDa) > Ultracentrifugation (186,000 g) > Filtration (0.22 ??m)	1DE-LC-ESI-MS/MS	433
521	289	275665770101	sEV	27566577	Oncotarget. 2016 Aug 23. doi: 10.18632/oncotarget.11535.	Secretome proteomics reveals candidate non-invasive biomarkers of BRCA1 deficiency in breast cancer.	Eukaryote	Mus musculus	Ex vivo	Primary breast tumor cell	Brca1 deficient (Brca1-/- p53-/-)	Concentration (3 kDa) > Prelcearing (12,000 g) > Ultracentrifugation (110,000 g)	1DE-LC-ESI-MS/MS	1881
522	289	275665770102	sEV	27566577	Oncotarget. 2016 Aug 23. doi: 10.18632/oncotarget.11535.	Secretome proteomics reveals candidate non-invasive biomarkers of BRCA1 deficiency in breast cancer.	Eukaryote	Mus musculus	Ex vivo	Primary breast tumor cell	Brca1 proficient (Cdh1-/- p53-/-)	Concentration (3 kDa) > Prelcearing (12,000 g) > Ultracentrifugation (110,000 g)	1DE-LC-ESI-MS/MS	947
523	289	275665770103	sEV	27566577	Oncotarget. 2016 Aug 23. doi: 10.18632/oncotarget.11535.	Secretome proteomics reveals candidate non-invasive biomarkers of BRCA1 deficiency in breast cancer.	Eukaryote	Mus musculus	Ex vivo	Primary breast tumor cell	Brca1 proficient (p53-/-)	Concentration (3 kDa) > Prelcearing (12,000 g) > Ultracentrifugation (110,000 g)	1DE-LC-ESI-MS/MS	1458
524	290	276054330101	sEV	27605433	Sci Rep. 2016 Sep 8;6:32643. doi: 10.1038/srep32643.	Secreted primary human malignant mesothelioma exosome signature reflects oncogenic cargo.	Eukaryote	Homo sapiens	In vitro	Mesothelioma cell (JO38)	Normal	Preclearing (500 g, 2000 g, 10,000 g) > Ultracentrifugation (100,000 g)	1DE-LC-ESI-MS/MS	1667
525	290	276054330102	sEV	27605433	Sci Rep. 2016 Sep 8;6:32643. doi: 10.1038/srep32643.	Secreted primary human malignant mesothelioma exosome signature reflects oncogenic cargo.	Eukaryote	Homo sapiens	In vitro	Mesothelioma cell (JU77)	Normal	Preclearing (500 g, 2000 g, 10,000 g) > Ultracentrifugation (100,000 g)	1DE-LC-ESI-MS/MS	1086
526	290	276054330103	sEV	27605433	Sci Rep. 2016 Sep 8;6:32643. doi: 10.1038/srep32643.	Secreted primary human malignant mesothelioma exosome signature reflects oncogenic cargo.	Eukaryote	Homo sapiens	In vitro	Mesothelioma cell (LO68)	Normal	Preclearing (500 g, 2000 g, 10,000 g) > Ultracentrifugation (100,000 g)	1DE-LC-ESI-MS/MS	1176
527	290	276054330104	sEV	27605433	Sci Rep. 2016 Sep 8;6:32643. doi: 10.1038/srep32643.	Secreted primary human malignant mesothelioma exosome signature reflects oncogenic cargo.	Eukaryote	Homo sapiens	In vitro	Mesothelioma cell (OLD1612)	Normal	Preclearing (500 g, 2000 g, 10,000 g) > Ultracentrifugation (100,000 g)	1DE-LC-ESI-MS/MS	1624
528	291	276091240101	sEV	27609124	Clin Chim Acta. 2016 Sep 5. pii: S0009-8981(16)30375-8. doi: 10.1016/j.cca.2016.09.001.	Exosomal proteome analysis of cerebrospinal fluid detects biosignatures of neuromyelitis optica and multiple sclerosis.	Eukaryote	Homo sapiens	In vivo	Cerebrospinal fluid	Idiopathic longitudinally extensive transverse myelitis	Filtration (0.45 ??m) > Preclearing (18,000 g) > Ultracentrifugation (200,000 g)	1DE-LC-ESI-MS/MS	389
529	291	276091240102	sEV	27609124	Clin Chim Acta. 2016 Sep 5. pii: S0009-8981(16)30375-8. doi: 10.1016/j.cca.2016.09.001.	Exosomal proteome analysis of cerebrospinal fluid detects biosignatures of neuromyelitis optica and multiple sclerosis.	Eukaryote	Homo sapiens	In vivo	Cerebrospinal fluid	Multiple sclerosis	Filtration (0.45 ??m) > Preclearing (18,000 g) > Ultracentrifugation (200,000 g)	1DE-LC-ESI-MS/MS	370
530	291	276091240103	sEV	27609124	Clin Chim Acta. 2016 Sep 5. pii: S0009-8981(16)30375-8. doi: 10.1016/j.cca.2016.09.001.	Exosomal proteome analysis of cerebrospinal fluid detects biosignatures of neuromyelitis optica and multiple sclerosis.	Eukaryote	Homo sapiens	In vivo	Cerebrospinal fluid	Neuromyelitis optica	Filtration (0.45 ??m) > Preclearing (18,000 g) > Ultracentrifugation (200,000 g)	1DE-LC-ESI-MS/MS	352
531	292	276199940101	sEV	27619994	J Immunol. 2016 Sep 12. pii: 1600614.	Mast Cell Degranulation Is Accompanied by the Release of a Selective Subset of Extracellular Vesicles That Contain Mast Cell-Specific Proteases.	Eukaryote	Mus musculus	Ex vivo	Peritoneal mast cell	IgE-stimulated	Preclearing (200 g, 500 g, 10,000 g) > Ultracentrifugation (100,000 g) > Sucrose cushion ultracentrifugation (192,000 g) > Iodixanol density gradient ultracentrifugation (192,000 g) > Ultracentrifugation (192,000 g)	1DE-LC-ESI-MS/MS	61
532	293	276490790101	#N/A	27649079	PLoS One. 2016 Sep 20;11(9):e0163043. doi: 10.1371/journal.pone.0163043. eCollection 2016.	Identification and Characterization of 293T Cell-Derived Exosomes by Profiling the Protein, mRNA and MicroRNA Components.	Eukaryote	Homo sapiens	In vitro	Embryonic kidney cell (293T)	Normal	Preclearing (300 g, 3000 g, 10,000 g) > Exosome Isolation kit > Filtration (0.22 ??m)	LC-ESI-MS/MS	3377
533	294	276654860101	Both	27665486	Cell Microbiol. 2016 Sep 25. doi: 10.1111/cmi.12672.	Dynamic flux of microvesicles modulate parasite-host cell interaction of Trypanosoma cruzi in eukaryotic cells.	Eukaryote	Homo sapiens	In vitro	Monocyte (THP-1)	Normal	Preclearing (160 g, 4000 g) > Ultracentrifugation (100,000 g)	SCX-LC-ESI-MS/MS	60
534	294	276654860102	Both	27665486	Cell Microbiol. 2016 Sep 25. doi: 10.1111/cmi.12672.	Dynamic flux of microvesicles modulate parasite-host cell interaction of Trypanosoma cruzi in eukaryotic cells.	Eukaryote	Homo sapiens	In vitro	Monocyte (THP-1)	T. cruzi (metacyclic trypomastigote stage)-treated	Preclearing (160 g, 4000 g) > Ultracentrifugation (100,000 g)	SCX-LC-ESI-MS/MS	96
535	294	276654860103	Both	27665486	Cell Microbiol. 2016 Sep 25. doi: 10.1111/cmi.12672.	Dynamic flux of microvesicles modulate parasite-host cell interaction of Trypanosoma cruzi in eukaryotic cells.	Eukaryote	Homo sapiens	In vitro	Monocyte (THP-1)	T. cruzi (tissue culture-derived trypomastigote)-treated	Preclearing (160 g, 4000 g) > Ultracentrifugation (100,000 g)	SCX-LC-ESI-MS/MS	116
536	294	276654860104	Both	27665486	Cell Microbiol. 2016 Sep 25. doi: 10.1111/cmi.12672.	Dynamic flux of microvesicles modulate parasite-host cell interaction of Trypanosoma cruzi in eukaryotic cells.	Eukaryote	Homo sapiens	In vitro	Monocyte (THP-1)	T. cruzi (non-infective epimastigote)-treated	Preclearing (160 g, 4000 g) > Ultracentrifugation (100,000 g)	SCX-LC-ESI-MS/MS	70
537	295	276667360101	MV	27666736	Proteomics Clin Appl. 2016 Sep 26. doi: 10.1002/prca.201600091.	Antibiotics and Iron-limiting conditions and their effect on the production and composition of outer membrane vesicles secreted from clinical isolates of extraintestinal pathogenic E. coli.	Prokaryote	Escherichia coli	In vitro	Escherichia coli O25b:H4-ST131	Gentamicin-resistant, control	Preclearing (4000 g) > Filtration (0.45 ??m) > Concentration (100 kDa) > Filtration (0.45 ??m) > Ultracentrifugation (40,000 g)	1DE-LC-ESI-MS/MS	698
538	295	276667360102	MV	27666736	Proteomics Clin Appl. 2016 Sep 26. doi: 10.1002/prca.201600091.	Antibiotics and Iron-limiting conditions and their effect on the production and composition of outer membrane vesicles secreted from clinical isolates of extraintestinal pathogenic E. coli.	Prokaryote	Escherichia coli	In vitro	Escherichia coli O25b:H4-ST131	Gentamicin-resistant, 400 ??M 2,2'-bipyridyl (BIP)-treated	Preclearing (4000 g) > Filtration (0.45 ??m) > Concentration (100 kDa) > Filtration (0.45 ??m) > Ultracentrifugation (40,000 g)	1DE-LC-ESI-MS/MS	504
539	295	276667360103	MV	27666736	Proteomics Clin Appl. 2016 Sep 26. doi: 10.1002/prca.201600091.	Antibiotics and Iron-limiting conditions and their effect on the production and composition of outer membrane vesicles secreted from clinical isolates of extraintestinal pathogenic E. coli.	Prokaryote	Escherichia coli	In vitro	Escherichia coli O25b:H4-ST131	Gentamicin-resistant, 600 ??M 2,2'-bipyridyl (BIP)-treated	Preclearing (4000 g) > Filtration (0.45 ??m) > Concentration (100 kDa) > Filtration (0.45 ??m) > Ultracentrifugation (40,000 g)	1DE-LC-ESI-MS/MS	551
540	295	276667360104	MV	27666736	Proteomics Clin Appl. 2016 Sep 26. doi: 10.1002/prca.201600091.	Antibiotics and Iron-limiting conditions and their effect on the production and composition of outer membrane vesicles secreted from clinical isolates of extraintestinal pathogenic E. coli.	Prokaryote	Escherichia coli	In vitro	Escherichia coli O25b:H4-ST131	Gentamicin-resistant, 0.5 ??g/mL gentamicin-treated	Preclearing (4000 g) > Filtration (0.45 ??m) > Concentration (100 kDa) > Filtration (0.45 ??m) > Ultracentrifugation (40,000 g)	1DE-LC-ESI-MS/MS	61
541	295	276667360105	MV	27666736	Proteomics Clin Appl. 2016 Sep 26. doi: 10.1002/prca.201600091.	Antibiotics and Iron-limiting conditions and their effect on the production and composition of outer membrane vesicles secreted from clinical isolates of extraintestinal pathogenic E. coli.	Prokaryote	Escherichia coli	In vitro	Escherichia coli O25b:H4-ST131	Gentamicin-resistant, 6.0 ??g/mL gentamicin-treated	Preclearing (4000 g) > Filtration (0.45 ??m) > Concentration (100 kDa) > Filtration (0.45 ??m) > Ultracentrifugation (40,000 g)	1DE-LC-ESI-MS/MS	156
542	295	276667360106	MV	27666736	Proteomics Clin Appl. 2016 Sep 26. doi: 10.1002/prca.201600091.	Antibiotics and Iron-limiting conditions and their effect on the production and composition of outer membrane vesicles secreted from clinical isolates of extraintestinal pathogenic E. coli.	Prokaryote	Escherichia coli	In vitro	Escherichia coli O25b:H4-ST131	Gentamicin-resistant, 12.0 ??g/mL gentamicin-treated	Preclearing (4000 g) > Filtration (0.45 ??m) > Concentration (100 kDa) > Filtration (0.45 ??m) > Ultracentrifugation (40,000 g)	1DE-LC-ESI-MS/MS	192
543	295	276667360107	MV	27666736	Proteomics Clin Appl. 2016 Sep 26. doi: 10.1002/prca.201600091.	Antibiotics and Iron-limiting conditions and their effect on the production and composition of outer membrane vesicles secreted from clinical isolates of extraintestinal pathogenic E. coli.	Prokaryote	Escherichia coli	In vitro	Escherichia coli O25b:H4-ST131	Gentamicin-sensitive, control	Preclearing (4000 g) > Filtration (0.45 ??m) > Concentration (100 kDa) > Filtration (0.45 ??m) > Ultracentrifugation (40,000 g)	1DE-LC-ESI-MS/MS	977
544	295	276667360108	MV	27666736	Proteomics Clin Appl. 2016 Sep 26. doi: 10.1002/prca.201600091.	Antibiotics and Iron-limiting conditions and their effect on the production and composition of outer membrane vesicles secreted from clinical isolates of extraintestinal pathogenic E. coli.	Prokaryote	Escherichia coli	In vitro	Escherichia coli O25b:H4-ST131	Gentamicin-sensitive, 400 ??M 2,2'-bipyridyl (BIP)-treated	Preclearing (4000 g) > Filtration (0.45 ??m) > Concentration (100 kDa) > Filtration (0.45 ??m) > Ultracentrifugation (40,000 g)	1DE-LC-ESI-MS/MS	556
545	295	276667360109	MV	27666736	Proteomics Clin Appl. 2016 Sep 26. doi: 10.1002/prca.201600091.	Antibiotics and Iron-limiting conditions and their effect on the production and composition of outer membrane vesicles secreted from clinical isolates of extraintestinal pathogenic E. coli.	Prokaryote	Escherichia coli	In vitro	Escherichia coli O25b:H4-ST131	Gentamicin-sensitive, 600 ??M 2,2'-bipyridyl (BIP)-treated	Preclearing (4000 g) > Filtration (0.45 ??m) > Concentration (100 kDa) > Filtration (0.45 ??m) > Ultracentrifugation (40,000 g)	1DE-LC-ESI-MS/MS	585
546	295	276667360110	MV	27666736	Proteomics Clin Appl. 2016 Sep 26. doi: 10.1002/prca.201600091.	Antibiotics and Iron-limiting conditions and their effect on the production and composition of outer membrane vesicles secreted from clinical isolates of extraintestinal pathogenic E. coli.	Prokaryote	Escherichia coli	In vitro	Escherichia coli O25b:H4-ST131	Gentamicin-sensitive, 0.5 ??g/mL gentamicin-treated	Preclearing (4000 g) > Filtration (0.45 ??m) > Concentration (100 kDa) > Filtration (0.45 ??m) > Ultracentrifugation (40,000 g)	1DE-LC-ESI-MS/MS	353
547	295	276667360111	MV	27666736	Proteomics Clin Appl. 2016 Sep 26. doi: 10.1002/prca.201600091.	Antibiotics and Iron-limiting conditions and their effect on the production and composition of outer membrane vesicles secreted from clinical isolates of extraintestinal pathogenic E. coli.	Prokaryote	Escherichia coli	In vitro	Escherichia coli O25b:H4-ST131	Gentamicin-sensitive, 6.0 ??g/mL gentamicin-treated	Preclearing (4000 g) > Filtration (0.45 ??m) > Concentration (100 kDa) > Filtration (0.45 ??m) > Ultracentrifugation (40,000 g)	1DE-LC-ESI-MS/MS	435
548	295	276667360112	MV	27666736	Proteomics Clin Appl. 2016 Sep 26. doi: 10.1002/prca.201600091.	Antibiotics and Iron-limiting conditions and their effect on the production and composition of outer membrane vesicles secreted from clinical isolates of extraintestinal pathogenic E. coli.	Prokaryote	Escherichia coli	In vitro	Escherichia coli O25b:H4-ST131	Gentamicin-sensitive, 12.0 ??g/mL gentamicin-treated	Preclearing (4000 g) > Filtration (0.45 ??m) > Concentration (100 kDa) > Filtration (0.45 ??m) > Ultracentrifugation (40,000 g)	1DE-LC-ESI-MS/MS	401
549	158	277239840101	Both	27723984	J Proteome Res. 2016 Oct 11.	Proteomic and bioinformatic characterization of extracellular vesicles released from human macrophages upon influenza A virus infection.	Eukaryote	Homo sapiens	Ex vivo	Monocyte-derived macrophage	Normal	Preclearing (500 g, 3000 g) > Concentration (100 kDa) > Ultracentrifugation (100,000 g)	1DE-LC-ESI-MS/MS	1448
550	158	277239840102	Both	27723984	J Proteome Res. 2016 Oct 11.	Proteomic and bioinformatic characterization of extracellular vesicles released from human macrophages upon influenza A virus infection.	Eukaryote	Homo sapiens	Ex vivo	Monocyte-derived macrophage	Influenza A virus-infected	Preclearing (500 g, 3000 g) > Concentration (100 kDa) > Ultracentrifugation (100,000 g)	1DE-LC-ESI-MS/MS	2354
551	296	277407630101	Both	27740763	J Proteome Res. 2016 Oct 14.	Candida albicans Modifies the Protein Composition and Size Distribution of THP1 macrophages-derived Extracellular Vesicles.	Eukaryote	Homo sapiens	In vitro	Macrophage (THP1)	Normal	Preclearing (1000 rpm, 3500 rpm) > Concentration (100 kDa) > Ultracentrifugation (100,000 g)	LC-ESI-MS/MS	719
552	296	277407630102	Both	27740763	J Proteome Res. 2016 Oct 14.	Candida albicans Modifies the Protein Composition and Size Distribution of THP1 macrophages-derived Extracellular Vesicles.	Eukaryote	Homo sapiens	In vitro	Macrophage (THP1)	Cocultured with C. albicans	Preclearing (1000 rpm, 3500 rpm) > Concentration (100 kDa) > Ultracentrifugation (100,000 g)	LC-ESI-MS/MS	719
553	297	277518430101	Both	27751843	Eur J Pharm Sci. 2016 Oct 14. pii: S0928-0987(16)30431-6. doi: 10.1016/j.ejps.2016.10.008.	Extracellular vesicles as a source for non-invasive biomarkers in bladder cancer progression.	Eukaryote	Homo sapiens	In vitro	Bladder cancer cell (UMUC-3, J82, SW780)	Normal	Preclearing (3500 g) > Filtration (0.22 ??m) > Ultracentrifugation (100,000 g)	1DE-LC-ESI-MS/MS	630
554	297	277518430102	Both	27751843	Eur J Pharm Sci. 2016 Oct 14. pii: S0928-0987(16)30431-6. doi: 10.1016/j.ejps.2016.10.008.	Extracellular vesicles as a source for non-invasive biomarkers in bladder cancer progression.	Eukaryote	Homo sapiens	In vivo	Urine	Normal	Preclearing (3500 g) > Filtration (0.22 ??m) > Ultracentrifugation (100,000 g)	1DE-LC-ESI-MS/MS	1467
555	297	277518430103	Both	27751843	Eur J Pharm Sci. 2016 Oct 14. pii: S0928-0987(16)30431-6. doi: 10.1016/j.ejps.2016.10.008.	Extracellular vesicles as a source for non-invasive biomarkers in bladder cancer progression.	Eukaryote	Homo sapiens	In vivo	Urine	High-grade bladder cancer	Preclearing (3500 g) > Filtration (0.22 ??m) > Ultracentrifugation (100,000 g)	1DE-LC-ESI-MS/MS	1249
556	243	277604630101	#N/A	27760463	J Proteome Res. 2016 Oct 19.	Mycobacterium tuberculosis Infection Manipulates the Glycosylation Machinery and the N-Glycoproteome of Human Macrophages and their Microparticles.	Eukaryote	Homo sapiens	In vitro	Monocyte (THP-1)	Normal	Preclearing (524 g, 3270 g) > Centrifugation (27,000 g)	1DE-LC-ESI-MS/MS	1086
557	243	277604630102	#N/A	27760463	J Proteome Res. 2016 Oct 19.	Mycobacterium tuberculosis Infection Manipulates the Glycosylation Machinery and the N-Glycoproteome of Human Macrophages and their Microparticles.	Eukaryote	Homo sapiens	In vitro	Monocyte (THP-1)	M. tuberculosis-infected	Preclearing (524 g, 3270 g) > Centrifugation (27,000 g)	1DE-LC-ESI-MS/MS	1086
558	298	277926490101	Both	27792649	J Am Heart Assoc. 2016 Oct 17;5(10). pii: e004099.	Macrophage Foam Cell-Derived Extracellular Vesicles Promote Vascular Smooth Muscle Cell Migration and Adhesion.	Eukaryote	Mus musculus	In vitro	Macrophage (J774a.1)	Normal	Preclearing (300 g, 500 g) > Ultracentrifugation (100,000 g)	LC-ESI-MS/MS	202
559	298	277926490102	Both	27792649	J Am Heart Assoc. 2016 Oct 17;5(10). pii: e004099.	Macrophage Foam Cell-Derived Extracellular Vesicles Promote Vascular Smooth Muscle Cell Migration and Adhesion.	Eukaryote	Mus musculus	In vitro	Macrophage (J774a.1)	Foam cells	Preclearing (300 g, 500 g) > Ultracentrifugation (100,000 g)	LC-ESI-MS/MS	570
560	299	278031830101	MV	27803183	MBio. 2016 Nov 1;7(6). pii: e00207-16. doi: 10.1128/mBio.00207-16.	A Two-Component Regulatory System Impacts Extracellular Membrane-Derived Vesicle Production in Group A Streptococcus.	Prokaryote	Streptococcus pyogenes	In vitro	Streptococcus pyogenes ISS3348	Normal	Preclearing (2500 g) > Filtration (0.22 ??m) > Ultracentrifugation (175,000 g)	LC-ESI-MS/MS	988
561	300	278218490101	sEV	27821849	Sci Rep. 2016 Nov 8;6:36338. doi: 10.1038/srep36338.	Detailed Analysis of Protein Topology of Extracellular Vesicles-Evidence of Unconventional Membrane Protein Orientation.	Eukaryote	Homo sapiens	In vitro	Mast cell (HMC-1)	Normal	Preclearing (300 g, 16,500 g) > Ultracentrifugation (118,000 g) > Iodixanol density gradient ultracentrifugation (178,000 g) > Ultracentrifugation (118,000 g)	LC-ESI-MS/MS	1508
562	193	278241090101	sEV	27824109	Sci Rep. 2016 Nov 8;6:36479. doi: 10.1038/srep36479.	Thymic exosomes promote the final maturation of thymocytes.	Eukaryote	Homo sapiens	In vivo	Thymus	Normal	Preclearing (850 g, 3000 g, 10,000 g) > Filtration (0.2 ??m) > Ultracentrifugation (100,000 g)	1DE-LC-ESI-MS/MS	1554
563	301	278370920101	sEV	27837092	Plant Physiol. 2016 Nov 8. pii: pp.01253.2016.	Extracellular vesicles isolated from the leaf apoplast carry stress-response proteins.	Eukaryote	Arabidopsis thaliana	In vivo	Apoplastic fluid	Normal	Preclearing (700 g) > Filtration (0.45 ??m) > Preclearing (10,000 g, 40,000 g) > Ultracentrifugation (100,000 g) > Iodixanol density gradient ultracentrifugation (100,000 g) > Ultracentrifugation (100,000 g)	LC-ESI-MS/MS	199
564	301	278370920102	sEV	27837092	Plant Physiol. 2016 Nov 8. pii: pp.01253.2016.	Extracellular vesicles isolated from the leaf apoplast carry stress-response proteins.	Eukaryote	Arabidopsis thaliana	In vivo	Apoplastic fluid	P. syringae-infected	Preclearing (700 g) > Filtration (0.45 ??m) > Preclearing (10,000 g, 40,000 g) > Ultracentrifugation (100,000 g) > Iodixanol density gradient ultracentrifugation (100,000 g) > Ultracentrifugation (100,000 g)	LC-ESI-MS/MS	194
565	302	278635370101	sEV	27863537	J Extracell Vesicles. 2016 Nov 17;5:32570. doi: 10.3402/jev.v5.32570. eCollection 2016.	High-resolution proteomic and lipidomic analysis of exosomes and microvesicles from different cell sources.	Eukaryote	Homo sapiens	In vitro	Hepatocellular carcinoma cell (Huh7)	Exosomes	Preclearing (500 g, 10,000 g) > Filtration (0.2 ??m) > Ultracentrifugation (100,000 g)	1DE-LC-ESI-MS/MS	1616
566	303	278635370102	lEV	27863537	J Extracell Vesicles. 2016 Nov 17;5:32570. doi: 10.3402/jev.v5.32570. eCollection 2016.	High-resolution proteomic and lipidomic analysis of exosomes and microvesicles from different cell sources.	Eukaryote	Homo sapiens	In vitro	Hepatocellular carcinoma cell (Huh7)	Microvesicles	Preclearing (500 g) > Centrifugation (10,000 g)	1DE-LC-ESI-MS/MS	2054
567	302	278635370103	sEV	27863537	J Extracell Vesicles. 2016 Nov 17;5:32570. doi: 10.3402/jev.v5.32570. eCollection 2016.	High-resolution proteomic and lipidomic analysis of exosomes and microvesicles from different cell sources.	Eukaryote	Homo sapiens	In vitro	Bone marrow-derived mesenchymal stem cell (MSC)	Exosomes	Preclearing (500 g, 10,000 g) > Filtration (0.2 ??m) > Ultracentrifugation (100,000 g)	1DE-LC-ESI-MS/MS	539
568	303	278635370104	lEV	27863537	J Extracell Vesicles. 2016 Nov 17;5:32570. doi: 10.3402/jev.v5.32570. eCollection 2016.	High-resolution proteomic and lipidomic analysis of exosomes and microvesicles from different cell sources.	Eukaryote	Homo sapiens	In vitro	Bone marrow-derived mesenchymal stem cell (MSC)	Microvesicles	Preclearing (500 g) > Centrifugation (10,000 g)	1DE-LC-ESI-MS/MS	1522
569	302	278635370105	sEV	27863537	J Extracell Vesicles. 2016 Nov 17;5:32570. doi: 10.3402/jev.v5.32570. eCollection 2016.	High-resolution proteomic and lipidomic analysis of exosomes and microvesicles from different cell sources.	Eukaryote	Homo sapiens	In vitro	Glioblastoma cell (U87)	Exosomes	Preclearing (500 g, 10,000 g) > Filtration (0.2 ??m) > Ultracentrifugation (100,000 g)	1DE-LC-ESI-MS/MS	1632
570	303	278635370106	lEV	27863537	J Extracell Vesicles. 2016 Nov 17;5:32570. doi: 10.3402/jev.v5.32570. eCollection 2016.	High-resolution proteomic and lipidomic analysis of exosomes and microvesicles from different cell sources.	Eukaryote	Homo sapiens	In vitro	Glioblastoma cell (U87)	Microvesicles	Preclearing (500 g) > Centrifugation (10,000 g)	1DE-LC-ESI-MS/MS	2108
571	304	278657820101	Both	27865782	Clin Biochem. 2016 Nov 16. pii: S0009-9120(16)30570-7. doi: 10.1016/j.clinbiochem.2016.11.013.	Application of nano-LC-MALDI-TOF/TOF-MS for proteomic analysis of microvesicles.	Eukaryote	Homo sapiens	In vivo	Blood	Normal	Preclearing (165 g, 750 g) > Ultracentrifugation (100,000 g)	LC-MALDI-MS/MS	446
572	267	278941040101	Both	27894104	Oncotarget. 2016 Nov 24. doi: 10.18632/oncotarget.13569.	Proteomic profiling of NCI-60 extracellular vesicles uncovers common protein cargo and cancer type-specific biomarkers.	Eukaryote	Homo sapiens	In vitro	Breast cancer cell (BT549)	Normal	Preclearing (500 g, 2000 g) > PEG precipitation > Centrifugation (3214 g) > Ultracentrifugation (100,000 g)	1DE-LC-ESI-MS/MS	2269
573	267	278941040102	Both	27894104	Oncotarget. 2016 Nov 24. doi: 10.18632/oncotarget.13569.	Proteomic profiling of NCI-60 extracellular vesicles uncovers common protein cargo and cancer type-specific biomarkers.	Eukaryote	Homo sapiens	In vitro	Breast cancer cell (HS 578T)	Normal	Preclearing (500 g, 2000 g) > PEG precipitation > Centrifugation (3214 g) > Ultracentrifugation (100,000 g)	1DE-LC-ESI-MS/MS	1228
574	267	278941040103	Both	27894104	Oncotarget. 2016 Nov 24. doi: 10.18632/oncotarget.13569.	Proteomic profiling of NCI-60 extracellular vesicles uncovers common protein cargo and cancer type-specific biomarkers.	Eukaryote	Homo sapiens	In vitro	Breast cancer cell (MCF7)	Normal	Preclearing (500 g, 2000 g) > PEG precipitation > Centrifugation (3214 g) > Ultracentrifugation (100,000 g)	1DE-LC-ESI-MS/MS	2299
575	267	278941040104	Both	27894104	Oncotarget. 2016 Nov 24. doi: 10.18632/oncotarget.13569.	Proteomic profiling of NCI-60 extracellular vesicles uncovers common protein cargo and cancer type-specific biomarkers.	Eukaryote	Homo sapiens	In vitro	Breast cancer cell (MDA-MB-231)	Normal	Preclearing (500 g, 2000 g) > PEG precipitation > Centrifugation (3214 g) > Ultracentrifugation (100,000 g)	1DE-LC-ESI-MS/MS	2237
576	267	278941040105	Both	27894104	Oncotarget. 2016 Nov 24. doi: 10.18632/oncotarget.13569.	Proteomic profiling of NCI-60 extracellular vesicles uncovers common protein cargo and cancer type-specific biomarkers.	Eukaryote	Homo sapiens	In vitro	Breast cancer cell (MDA-MB-468)	Normal	Preclearing (500 g, 2000 g) > PEG precipitation > Centrifugation (3214 g) > Ultracentrifugation (100,000 g)	1DE-LC-ESI-MS/MS	2377
577	267	278941040106	Both	27894104	Oncotarget. 2016 Nov 24. doi: 10.18632/oncotarget.13569.	Proteomic profiling of NCI-60 extracellular vesicles uncovers common protein cargo and cancer type-specific biomarkers.	Eukaryote	Homo sapiens	In vitro	Breast cancer cell (T-47D)	Normal	Preclearing (500 g, 2000 g) > PEG precipitation > Centrifugation (3214 g) > Ultracentrifugation (100,000 g)	1DE-LC-ESI-MS/MS	2092
578	267	278941040107	Both	27894104	Oncotarget. 2016 Nov 24. doi: 10.18632/oncotarget.13569.	Proteomic profiling of NCI-60 extracellular vesicles uncovers common protein cargo and cancer type-specific biomarkers.	Eukaryote	Homo sapiens	In vitro	Central nervous system cancer cell (SF268)	Normal	Preclearing (500 g, 2000 g) > PEG precipitation > Centrifugation (3214 g) > Ultracentrifugation (100,000 g)	1DE-LC-ESI-MS/MS	1819
579	267	278941040108	Both	27894104	Oncotarget. 2016 Nov 24. doi: 10.18632/oncotarget.13569.	Proteomic profiling of NCI-60 extracellular vesicles uncovers common protein cargo and cancer type-specific biomarkers.	Eukaryote	Homo sapiens	In vitro	Central nervous system cancer cell (SF295)	Normal	Preclearing (500 g, 2000 g) > PEG precipitation > Centrifugation (3214 g) > Ultracentrifugation (100,000 g)	1DE-LC-ESI-MS/MS	2041
580	267	278941040109	Both	27894104	Oncotarget. 2016 Nov 24. doi: 10.18632/oncotarget.13569.	Proteomic profiling of NCI-60 extracellular vesicles uncovers common protein cargo and cancer type-specific biomarkers.	Eukaryote	Homo sapiens	In vitro	Central nervous system cancer cell (SF539)	Normal	Preclearing (500 g, 2000 g) > PEG precipitation > Centrifugation (3214 g) > Ultracentrifugation (100,000 g)	1DE-LC-ESI-MS/MS	1761
581	267	278941040110	Both	27894104	Oncotarget. 2016 Nov 24. doi: 10.18632/oncotarget.13569.	Proteomic profiling of NCI-60 extracellular vesicles uncovers common protein cargo and cancer type-specific biomarkers.	Eukaryote	Homo sapiens	In vitro	Central nervous system cancer cell (SNB-19)	Normal	Preclearing (500 g, 2000 g) > PEG precipitation > Centrifugation (3214 g) > Ultracentrifugation (100,000 g)	1DE-LC-ESI-MS/MS	1857
582	267	278941040111	Both	27894104	Oncotarget. 2016 Nov 24. doi: 10.18632/oncotarget.13569.	Proteomic profiling of NCI-60 extracellular vesicles uncovers common protein cargo and cancer type-specific biomarkers.	Eukaryote	Homo sapiens	In vitro	Central nervous system cancer cell (SNB-75)	Normal	Preclearing (500 g, 2000 g) > PEG precipitation > Centrifugation (3214 g) > Ultracentrifugation (100,000 g)	1DE-LC-ESI-MS/MS	1909
583	267	278941040112	Both	27894104	Oncotarget. 2016 Nov 24. doi: 10.18632/oncotarget.13569.	Proteomic profiling of NCI-60 extracellular vesicles uncovers common protein cargo and cancer type-specific biomarkers.	Eukaryote	Homo sapiens	In vitro	Central nervous system cancer cell (U251)	Normal	Preclearing (500 g, 2000 g) > PEG precipitation > Centrifugation (3214 g) > Ultracentrifugation (100,000 g)	1DE-LC-ESI-MS/MS	1862
584	267	278941040113	Both	27894104	Oncotarget. 2016 Nov 24. doi: 10.18632/oncotarget.13569.	Proteomic profiling of NCI-60 extracellular vesicles uncovers common protein cargo and cancer type-specific biomarkers.	Eukaryote	Homo sapiens	In vitro	Colon cancer cell (Colo205)	Normal	Preclearing (500 g, 2000 g) > PEG precipitation > Centrifugation (3214 g) > Ultracentrifugation (100,000 g)	1DE-LC-ESI-MS/MS	2545
585	267	278941040114	Both	27894104	Oncotarget. 2016 Nov 24. doi: 10.18632/oncotarget.13569.	Proteomic profiling of NCI-60 extracellular vesicles uncovers common protein cargo and cancer type-specific biomarkers.	Eukaryote	Homo sapiens	In vitro	Colon cancer cell (HCC 2998)	Normal	Preclearing (500 g, 2000 g) > PEG precipitation > Centrifugation (3214 g) > Ultracentrifugation (100,000 g)	1DE-LC-ESI-MS/MS	1841
586	267	278941040115	Both	27894104	Oncotarget. 2016 Nov 24. doi: 10.18632/oncotarget.13569.	Proteomic profiling of NCI-60 extracellular vesicles uncovers common protein cargo and cancer type-specific biomarkers.	Eukaryote	Homo sapiens	In vitro	Colon cancer cell (HCT-116)	Normal	Preclearing (500 g, 2000 g) > PEG precipitation > Centrifugation (3214 g) > Ultracentrifugation (100,000 g)	1DE-LC-ESI-MS/MS	2510
587	267	278941040116	Both	27894104	Oncotarget. 2016 Nov 24. doi: 10.18632/oncotarget.13569.	Proteomic profiling of NCI-60 extracellular vesicles uncovers common protein cargo and cancer type-specific biomarkers.	Eukaryote	Homo sapiens	In vitro	Colon cancer cell (HCT-15)	Normal	Preclearing (500 g, 2000 g) > PEG precipitation > Centrifugation (3214 g) > Ultracentrifugation (100,000 g)	1DE-LC-ESI-MS/MS	2476
588	267	278941040117	Both	27894104	Oncotarget. 2016 Nov 24. doi: 10.18632/oncotarget.13569.	Proteomic profiling of NCI-60 extracellular vesicles uncovers common protein cargo and cancer type-specific biomarkers.	Eukaryote	Homo sapiens	In vitro	Colon cancer cell (HT29)	Normal	Preclearing (500 g, 2000 g) > PEG precipitation > Centrifugation (3214 g) > Ultracentrifugation (100,000 g)	1DE-LC-ESI-MS/MS	2059
589	267	278941040118	Both	27894104	Oncotarget. 2016 Nov 24. doi: 10.18632/oncotarget.13569.	Proteomic profiling of NCI-60 extracellular vesicles uncovers common protein cargo and cancer type-specific biomarkers.	Eukaryote	Homo sapiens	In vitro	Colon cancer cell (KM12)	Normal	Preclearing (500 g, 2000 g) > PEG precipitation > Centrifugation (3214 g) > Ultracentrifugation (100,000 g)	1DE-LC-ESI-MS/MS	2423
590	267	278941040119	Both	27894104	Oncotarget. 2016 Nov 24. doi: 10.18632/oncotarget.13569.	Proteomic profiling of NCI-60 extracellular vesicles uncovers common protein cargo and cancer type-specific biomarkers.	Eukaryote	Homo sapiens	In vitro	Colon cancer cell (SW620)	Normal	Preclearing (500 g, 2000 g) > PEG precipitation > Centrifugation (3214 g) > Ultracentrifugation (100,000 g)	1DE-LC-ESI-MS/MS	2691
591	267	278941040120	Both	27894104	Oncotarget. 2016 Nov 24. doi: 10.18632/oncotarget.13569.	Proteomic profiling of NCI-60 extracellular vesicles uncovers common protein cargo and cancer type-specific biomarkers.	Eukaryote	Homo sapiens	In vitro	Kidney cancer cell (786-O)	Normal	Preclearing (500 g, 2000 g) > PEG precipitation > Centrifugation (3214 g) > Ultracentrifugation (100,000 g)	1DE-LC-ESI-MS/MS	1442
592	267	278941040121	Both	27894104	Oncotarget. 2016 Nov 24. doi: 10.18632/oncotarget.13569.	Proteomic profiling of NCI-60 extracellular vesicles uncovers common protein cargo and cancer type-specific biomarkers.	Eukaryote	Homo sapiens	In vitro	Kidney cancer cell (A498)	Normal	Preclearing (500 g, 2000 g) > PEG precipitation > Centrifugation (3214 g) > Ultracentrifugation (100,000 g)	1DE-LC-ESI-MS/MS	2536
593	267	278941040122	Both	27894104	Oncotarget. 2016 Nov 24. doi: 10.18632/oncotarget.13569.	Proteomic profiling of NCI-60 extracellular vesicles uncovers common protein cargo and cancer type-specific biomarkers.	Eukaryote	Homo sapiens	In vitro	Kidney cancer cell (ACHN)	Normal	Preclearing (500 g, 2000 g) > PEG precipitation > Centrifugation (3214 g) > Ultracentrifugation (100,000 g)	1DE-LC-ESI-MS/MS	1486
594	267	278941040123	Both	27894104	Oncotarget. 2016 Nov 24. doi: 10.18632/oncotarget.13569.	Proteomic profiling of NCI-60 extracellular vesicles uncovers common protein cargo and cancer type-specific biomarkers.	Eukaryote	Homo sapiens	In vitro	Kidney cancer cell (CAKI)	Normal	Preclearing (500 g, 2000 g) > PEG precipitation > Centrifugation (3214 g) > Ultracentrifugation (100,000 g)	1DE-LC-ESI-MS/MS	1401
595	267	278941040124	Both	27894104	Oncotarget. 2016 Nov 24. doi: 10.18632/oncotarget.13569.	Proteomic profiling of NCI-60 extracellular vesicles uncovers common protein cargo and cancer type-specific biomarkers.	Eukaryote	Homo sapiens	In vitro	Kidney cancer cell (RXF 393)	Normal	Preclearing (500 g, 2000 g) > PEG precipitation > Centrifugation (3214 g) > Ultracentrifugation (100,000 g)	1DE-LC-ESI-MS/MS	1830
596	267	278941040125	Both	27894104	Oncotarget. 2016 Nov 24. doi: 10.18632/oncotarget.13569.	Proteomic profiling of NCI-60 extracellular vesicles uncovers common protein cargo and cancer type-specific biomarkers.	Eukaryote	Homo sapiens	In vitro	Kidney cancer cell (SN12C)	Normal	Preclearing (500 g, 2000 g) > PEG precipitation > Centrifugation (3214 g) > Ultracentrifugation (100,000 g)	1DE-LC-ESI-MS/MS	1716
597	267	278941040126	Both	27894104	Oncotarget. 2016 Nov 24. doi: 10.18632/oncotarget.13569.	Proteomic profiling of NCI-60 extracellular vesicles uncovers common protein cargo and cancer type-specific biomarkers.	Eukaryote	Homo sapiens	In vitro	Kidney cancer cell (TK-10)	Normal	Preclearing (500 g, 2000 g) > PEG precipitation > Centrifugation (3214 g) > Ultracentrifugation (100,000 g)	1DE-LC-ESI-MS/MS	1880
598	267	278941040127	Both	27894104	Oncotarget. 2016 Nov 24. doi: 10.18632/oncotarget.13569.	Proteomic profiling of NCI-60 extracellular vesicles uncovers common protein cargo and cancer type-specific biomarkers.	Eukaryote	Homo sapiens	In vitro	Kidney cancer cell (UO-31)	Normal	Preclearing (500 g, 2000 g) > PEG precipitation > Centrifugation (3214 g) > Ultracentrifugation (100,000 g)	1DE-LC-ESI-MS/MS	1427
599	267	278941040128	Both	27894104	Oncotarget. 2016 Nov 24. doi: 10.18632/oncotarget.13569.	Proteomic profiling of NCI-60 extracellular vesicles uncovers common protein cargo and cancer type-specific biomarkers.	Eukaryote	Homo sapiens	In vitro	Leukemia cell (CCRF-CEM)	Normal	Preclearing (500 g, 2000 g) > PEG precipitation > Centrifugation (3214 g) > Ultracentrifugation (100,000 g)	1DE-LC-ESI-MS/MS	2331
600	267	278941040129	Both	27894104	Oncotarget. 2016 Nov 24. doi: 10.18632/oncotarget.13569.	Proteomic profiling of NCI-60 extracellular vesicles uncovers common protein cargo and cancer type-specific biomarkers.	Eukaryote	Homo sapiens	In vitro	Leukemia cell (HL-60)	Normal	Preclearing (500 g, 2000 g) > PEG precipitation > Centrifugation (3214 g) > Ultracentrifugation (100,000 g)	1DE-LC-ESI-MS/MS	1678
601	267	278941040130	Both	27894104	Oncotarget. 2016 Nov 24. doi: 10.18632/oncotarget.13569.	Proteomic profiling of NCI-60 extracellular vesicles uncovers common protein cargo and cancer type-specific biomarkers.	Eukaryote	Homo sapiens	In vitro	Leukemia cell (K562)	Normal	Preclearing (500 g, 2000 g) > PEG precipitation > Centrifugation (3214 g) > Ultracentrifugation (100,000 g)	1DE-LC-ESI-MS/MS	2155
602	267	278941040131	Both	27894104	Oncotarget. 2016 Nov 24. doi: 10.18632/oncotarget.13569.	Proteomic profiling of NCI-60 extracellular vesicles uncovers common protein cargo and cancer type-specific biomarkers.	Eukaryote	Homo sapiens	In vitro	Leukemia cell (MOLT-4)	Normal	Preclearing (500 g, 2000 g) > PEG precipitation > Centrifugation (3214 g) > Ultracentrifugation (100,000 g)	1DE-LC-ESI-MS/MS	2020
603	267	278941040132	Both	27894104	Oncotarget. 2016 Nov 24. doi: 10.18632/oncotarget.13569.	Proteomic profiling of NCI-60 extracellular vesicles uncovers common protein cargo and cancer type-specific biomarkers.	Eukaryote	Homo sapiens	In vitro	Leukemia cell (RPMI-8226)	Normal	Preclearing (500 g, 2000 g) > PEG precipitation > Centrifugation (3214 g) > Ultracentrifugation (100,000 g)	1DE-LC-ESI-MS/MS	1694
604	267	278941040133	Both	27894104	Oncotarget. 2016 Nov 24. doi: 10.18632/oncotarget.13569.	Proteomic profiling of NCI-60 extracellular vesicles uncovers common protein cargo and cancer type-specific biomarkers.	Eukaryote	Homo sapiens	In vitro	Leukemia cell (SR)	Normal	Preclearing (500 g, 2000 g) > PEG precipitation > Centrifugation (3214 g) > Ultracentrifugation (100,000 g)	1DE-LC-ESI-MS/MS	1772
605	267	278941040134	Both	27894104	Oncotarget. 2016 Nov 24. doi: 10.18632/oncotarget.13569.	Proteomic profiling of NCI-60 extracellular vesicles uncovers common protein cargo and cancer type-specific biomarkers.	Eukaryote	Homo sapiens	In vitro	Lung cancer cell (A549)	Normal	Preclearing (500 g, 2000 g) > PEG precipitation > Centrifugation (3214 g) > Ultracentrifugation (100,000 g)	1DE-LC-ESI-MS/MS	1868
606	267	278941040135	Both	27894104	Oncotarget. 2016 Nov 24. doi: 10.18632/oncotarget.13569.	Proteomic profiling of NCI-60 extracellular vesicles uncovers common protein cargo and cancer type-specific biomarkers.	Eukaryote	Homo sapiens	In vitro	Lung cancer cell (EKVX)	Normal	Preclearing (500 g, 2000 g) > PEG precipitation > Centrifugation (3214 g) > Ultracentrifugation (100,000 g)	1DE-LC-ESI-MS/MS	1136
607	267	278941040136	Both	27894104	Oncotarget. 2016 Nov 24. doi: 10.18632/oncotarget.13569.	Proteomic profiling of NCI-60 extracellular vesicles uncovers common protein cargo and cancer type-specific biomarkers.	Eukaryote	Homo sapiens	In vitro	Lung cancer cell (HOP-62)	Normal	Preclearing (500 g, 2000 g) > PEG precipitation > Centrifugation (3214 g) > Ultracentrifugation (100,000 g)	1DE-LC-ESI-MS/MS	1740
608	267	278941040137	Both	27894104	Oncotarget. 2016 Nov 24. doi: 10.18632/oncotarget.13569.	Proteomic profiling of NCI-60 extracellular vesicles uncovers common protein cargo and cancer type-specific biomarkers.	Eukaryote	Homo sapiens	In vitro	Lung cancer cell (HOP-92)	Normal	Preclearing (500 g, 2000 g) > PEG precipitation > Centrifugation (3214 g) > Ultracentrifugation (100,000 g)	1DE-LC-ESI-MS/MS	1525
609	267	278941040138	Both	27894104	Oncotarget. 2016 Nov 24. doi: 10.18632/oncotarget.13569.	Proteomic profiling of NCI-60 extracellular vesicles uncovers common protein cargo and cancer type-specific biomarkers.	Eukaryote	Homo sapiens	In vitro	Lung cancer cell (NCI-H226)	Normal	Preclearing (500 g, 2000 g) > PEG precipitation > Centrifugation (3214 g) > Ultracentrifugation (100,000 g)	1DE-LC-ESI-MS/MS	1755
610	267	278941040139	Both	27894104	Oncotarget. 2016 Nov 24. doi: 10.18632/oncotarget.13569.	Proteomic profiling of NCI-60 extracellular vesicles uncovers common protein cargo and cancer type-specific biomarkers.	Eukaryote	Homo sapiens	In vitro	Lung cancer cell (NCI-H23)	Normal	Preclearing (500 g, 2000 g) > PEG precipitation > Centrifugation (3214 g) > Ultracentrifugation (100,000 g)	1DE-LC-ESI-MS/MS	1663
611	267	278941040140	Both	27894104	Oncotarget. 2016 Nov 24. doi: 10.18632/oncotarget.13569.	Proteomic profiling of NCI-60 extracellular vesicles uncovers common protein cargo and cancer type-specific biomarkers.	Eukaryote	Homo sapiens	In vitro	Lung cancer cell (NCI-H322M)	Normal	Preclearing (500 g, 2000 g) > PEG precipitation > Centrifugation (3214 g) > Ultracentrifugation (100,000 g)	1DE-LC-ESI-MS/MS	1208
612	267	278941040141	Both	27894104	Oncotarget. 2016 Nov 24. doi: 10.18632/oncotarget.13569.	Proteomic profiling of NCI-60 extracellular vesicles uncovers common protein cargo and cancer type-specific biomarkers.	Eukaryote	Homo sapiens	In vitro	Lung cancer cell (NCI-H460)	Normal	Preclearing (500 g, 2000 g) > PEG precipitation > Centrifugation (3214 g) > Ultracentrifugation (100,000 g)	1DE-LC-ESI-MS/MS	1336
613	267	278941040142	Both	27894104	Oncotarget. 2016 Nov 24. doi: 10.18632/oncotarget.13569.	Proteomic profiling of NCI-60 extracellular vesicles uncovers common protein cargo and cancer type-specific biomarkers.	Eukaryote	Homo sapiens	In vitro	Lung cancer cell (NCI-H522)	Normal	Preclearing (500 g, 2000 g) > PEG precipitation > Centrifugation (3214 g) > Ultracentrifugation (100,000 g)	1DE-LC-ESI-MS/MS	1608
614	267	278941040143	Both	27894104	Oncotarget. 2016 Nov 24. doi: 10.18632/oncotarget.13569.	Proteomic profiling of NCI-60 extracellular vesicles uncovers common protein cargo and cancer type-specific biomarkers.	Eukaryote	Homo sapiens	In vitro	Melanoma cell (LOX IMVI)	Normal	Preclearing (500 g, 2000 g) > PEG precipitation > Centrifugation (3214 g) > Ultracentrifugation (100,000 g)	1DE-LC-ESI-MS/MS	2382
615	267	278941040144	Both	27894104	Oncotarget. 2016 Nov 24. doi: 10.18632/oncotarget.13569.	Proteomic profiling of NCI-60 extracellular vesicles uncovers common protein cargo and cancer type-specific biomarkers.	Eukaryote	Homo sapiens	In vitro	Melanoma cell (M14)	Normal	Preclearing (500 g, 2000 g) > PEG precipitation > Centrifugation (3214 g) > Ultracentrifugation (100,000 g)	1DE-LC-ESI-MS/MS	1409
616	267	278941040145	Both	27894104	Oncotarget. 2016 Nov 24. doi: 10.18632/oncotarget.13569.	Proteomic profiling of NCI-60 extracellular vesicles uncovers common protein cargo and cancer type-specific biomarkers.	Eukaryote	Homo sapiens	In vitro	Melanoma cell (MALME-3M)	Normal	Preclearing (500 g, 2000 g) > PEG precipitation > Centrifugation (3214 g) > Ultracentrifugation (100,000 g)	1DE-LC-ESI-MS/MS	2074
617	267	278941040146	Both	27894104	Oncotarget. 2016 Nov 24. doi: 10.18632/oncotarget.13569.	Proteomic profiling of NCI-60 extracellular vesicles uncovers common protein cargo and cancer type-specific biomarkers.	Eukaryote	Homo sapiens	In vitro	Melanoma cell (MDA-MB-435)	Normal	Preclearing (500 g, 2000 g) > PEG precipitation > Centrifugation (3214 g) > Ultracentrifugation (100,000 g)	1DE-LC-ESI-MS/MS	1680
618	267	278941040147	Both	27894104	Oncotarget. 2016 Nov 24. doi: 10.18632/oncotarget.13569.	Proteomic profiling of NCI-60 extracellular vesicles uncovers common protein cargo and cancer type-specific biomarkers.	Eukaryote	Homo sapiens	In vitro	Melanoma cell (SK-MEL-2)	Normal	Preclearing (500 g, 2000 g) > PEG precipitation > Centrifugation (3214 g) > Ultracentrifugation (100,000 g)	1DE-LC-ESI-MS/MS	2262
619	267	278941040148	Both	27894104	Oncotarget. 2016 Nov 24. doi: 10.18632/oncotarget.13569.	Proteomic profiling of NCI-60 extracellular vesicles uncovers common protein cargo and cancer type-specific biomarkers.	Eukaryote	Homo sapiens	In vitro	Melanoma cell (SK-MEL-28)	Normal	Preclearing (500 g, 2000 g) > PEG precipitation > Centrifugation (3214 g) > Ultracentrifugation (100,000 g)	1DE-LC-ESI-MS/MS	1817
620	267	278941040149	Both	27894104	Oncotarget. 2016 Nov 24. doi: 10.18632/oncotarget.13569.	Proteomic profiling of NCI-60 extracellular vesicles uncovers common protein cargo and cancer type-specific biomarkers.	Eukaryote	Homo sapiens	In vitro	Melanoma cell (SK-MEL-5)	Normal	Preclearing (500 g, 2000 g) > PEG precipitation > Centrifugation (3214 g) > Ultracentrifugation (100,000 g)	1DE-LC-ESI-MS/MS	2225
621	267	278941040150	Both	27894104	Oncotarget. 2016 Nov 24. doi: 10.18632/oncotarget.13569.	Proteomic profiling of NCI-60 extracellular vesicles uncovers common protein cargo and cancer type-specific biomarkers.	Eukaryote	Homo sapiens	In vitro	Melanoma cell (UACC-257)	Normal	Preclearing (500 g, 2000 g) > PEG precipitation > Centrifugation (3214 g) > Ultracentrifugation (100,000 g)	1DE-LC-ESI-MS/MS	1940
622	267	278941040151	Both	27894104	Oncotarget. 2016 Nov 24. doi: 10.18632/oncotarget.13569.	Proteomic profiling of NCI-60 extracellular vesicles uncovers common protein cargo and cancer type-specific biomarkers.	Eukaryote	Homo sapiens	In vitro	Melanoma cell (UACC-62)	Normal	Preclearing (500 g, 2000 g) > PEG precipitation > Centrifugation (3214 g) > Ultracentrifugation (100,000 g)	1DE-LC-ESI-MS/MS	1728
623	267	278941040152	Both	27894104	Oncotarget. 2016 Nov 24. doi: 10.18632/oncotarget.13569.	Proteomic profiling of NCI-60 extracellular vesicles uncovers common protein cargo and cancer type-specific biomarkers.	Eukaryote	Homo sapiens	In vitro	Ovarian cancer cell (IGROV1)	Normal	Preclearing (500 g, 2000 g) > PEG precipitation > Centrifugation (3214 g) > Ultracentrifugation (100,000 g)	1DE-LC-ESI-MS/MS	1699
624	267	278941040153	Both	27894104	Oncotarget. 2016 Nov 24. doi: 10.18632/oncotarget.13569.	Proteomic profiling of NCI-60 extracellular vesicles uncovers common protein cargo and cancer type-specific biomarkers.	Eukaryote	Homo sapiens	In vitro	Ovarian cancer cell (OVCAR-3)	Normal	Preclearing (500 g, 2000 g) > PEG precipitation > Centrifugation (3214 g) > Ultracentrifugation (100,000 g)	1DE-LC-ESI-MS/MS	2245
625	267	278941040154	Both	27894104	Oncotarget. 2016 Nov 24. doi: 10.18632/oncotarget.13569.	Proteomic profiling of NCI-60 extracellular vesicles uncovers common protein cargo and cancer type-specific biomarkers.	Eukaryote	Homo sapiens	In vitro	Ovarian cancer cell (OVCAR-4)	Normal	Preclearing (500 g, 2000 g) > PEG precipitation > Centrifugation (3214 g) > Ultracentrifugation (100,000 g)	1DE-LC-ESI-MS/MS	2717
626	267	278941040155	Both	27894104	Oncotarget. 2016 Nov 24. doi: 10.18632/oncotarget.13569.	Proteomic profiling of NCI-60 extracellular vesicles uncovers common protein cargo and cancer type-specific biomarkers.	Eukaryote	Homo sapiens	In vitro	Ovarian cancer cell (OVCAR-5)	Normal	Preclearing (500 g, 2000 g) > PEG precipitation > Centrifugation (3214 g) > Ultracentrifugation (100,000 g)	1DE-LC-ESI-MS/MS	2000
627	267	278941040156	Both	27894104	Oncotarget. 2016 Nov 24. doi: 10.18632/oncotarget.13569.	Proteomic profiling of NCI-60 extracellular vesicles uncovers common protein cargo and cancer type-specific biomarkers.	Eukaryote	Homo sapiens	In vitro	Ovarian cancer cell (OVCAR-8)	Normal	Preclearing (500 g, 2000 g) > PEG precipitation > Centrifugation (3214 g) > Ultracentrifugation (100,000 g)	1DE-LC-ESI-MS/MS	2005
628	267	278941040157	Both	27894104	Oncotarget. 2016 Nov 24. doi: 10.18632/oncotarget.13569.	Proteomic profiling of NCI-60 extracellular vesicles uncovers common protein cargo and cancer type-specific biomarkers.	Eukaryote	Homo sapiens	In vitro	Ovarian cancer cell (SK-OV-3)	Normal	Preclearing (500 g, 2000 g) > PEG precipitation > Centrifugation (3214 g) > Ultracentrifugation (100,000 g)	1DE-LC-ESI-MS/MS	1569
629	267	278941040158	Both	27894104	Oncotarget. 2016 Nov 24. doi: 10.18632/oncotarget.13569.	Proteomic profiling of NCI-60 extracellular vesicles uncovers common protein cargo and cancer type-specific biomarkers.	Eukaryote	Homo sapiens	In vitro	Ovarian cancer cell (NCI-ADR-RES)	Normal	Preclearing (500 g, 2000 g) > PEG precipitation > Centrifugation (3214 g) > Ultracentrifugation (100,000 g)	1DE-LC-ESI-MS/MS	2341
630	267	278941040159	Both	27894104	Oncotarget. 2016 Nov 24. doi: 10.18632/oncotarget.13569.	Proteomic profiling of NCI-60 extracellular vesicles uncovers common protein cargo and cancer type-specific biomarkers.	Eukaryote	Homo sapiens	In vitro	Prostate cancer cell (DU145)	Normal	Preclearing (500 g, 2000 g) > PEG precipitation > Centrifugation (3214 g) > Ultracentrifugation (100,000 g)	1DE-LC-ESI-MS/MS	1274
631	267	278941040160	Both	27894104	Oncotarget. 2016 Nov 24. doi: 10.18632/oncotarget.13569.	Proteomic profiling of NCI-60 extracellular vesicles uncovers common protein cargo and cancer type-specific biomarkers.	Eukaryote	Homo sapiens	In vitro	Prostate cancer cell (PC-3)	Normal	Preclearing (500 g, 2000 g) > PEG precipitation > Centrifugation (3214 g) > Ultracentrifugation (100,000 g)	1DE-LC-ESI-MS/MS	1558
632	305	279090580101	sEV	27909058	J Biol Chem. 2016 Dec 1. pii: jbc.M116.747618.	Secreted Glioblastoma Nanovesicles Contain Intracellular Signaling Proteins and Active Ras Incorporated in a Farnesylation-dependent Manner.	Eukaryote	Mus musculus	In vitro	Glioblastoma cell (005)	Normal	Preclearing (300 g, 16,500 g) > Filtration (0.2 ??m) > Ultracentrifugation (110,000 g) > Sucrose cushion ultracentrifugation (110,000 g)	LC-ESI-MS/MS	565
633	306	279120600101	Both	27912060	Cell. 2016 Dec 1;167(6):1525-1539.e17. doi: 10.1016/j.cell.2016.11.005.	The Hippo Pathway Kinases LATS1/2 Suppress Cancer Immunity.	Eukaryote	Mus musculus	In vitro	Melanoma cell (B16-OVA)	Normal	Preclearing (2000 g) > Filtration (0.22 ??m) > Ultracentrifugation (110,000 g)	1DE-LC-ESI-MS/MS	1692
634	306	279120600102	Both	27912060	Cell. 2016 Dec 1;167(6):1525-1539.e17. doi: 10.1016/j.cell.2016.11.005.	The Hippo Pathway Kinases LATS1/2 Suppress Cancer Immunity.	Eukaryote	Mus musculus	In vitro	Melanoma cell (B16-OVA)	LATS1/2-/-	Preclearing (2000 g) > Filtration (0.22 ??m) > Ultracentrifugation (110,000 g)	1DE-LC-ESI-MS/MS	1691
635	307	279178750101	lEV	27917875	Sci Rep. 2016 Dec 5;6:37871. doi: 10.1038/srep37871.	Exploring experimental cerebral malaria pathogenesis through the characterisation of host-derived plasma microparticle protein content.	Eukaryote	Mus musculus	In vivo	Platelet-poor plasma	Normal	Preclearing (1500 g) > Ultracentrifugation (18,000 g)	LC-ESI-MS/MS	181
636	307	279178750102	lEV	27917875	Sci Rep. 2016 Dec 5;6:37871. doi: 10.1038/srep37871.	Exploring experimental cerebral malaria pathogenesis through the characterisation of host-derived plasma microparticle protein content.	Eukaryote	Mus musculus	In vivo	Platelet-poor plasma	Experimental cerebral malaria	Preclearing (1500 g) > Ultracentrifugation (18,000 g)	LC-ESI-MS/MS	160
637	308	280356020101	MV	28035602	J Microbiol. 2017 Jan;55(1):56-62. doi: 10.1007/s12275-017-6581-6. Epub 2016 Dec 30.	Proteomic characterization of the outer membrane vesicle of the halophilic marine bacterium Novosphingobium pentaromativorans US6-1.	Prokaryote	Novosphingobium pentaromativorans	In vitro	Novosphingobium pentaromativorans US6-1	Normal	Preclearing (10,000 g) > Filtration (0.45 ??m) > Concentration (500 kDa) > Filtration (0.22 ??m) > Ultracentrifugation (150,000 g)	1DE-LC-ESI-MS/MS	129
638	309	281583020101	MV	28158302	PLoS Pathog. 2017 Feb 3;13(2):e1006159. doi: 10.1371/journal.ppat.1006159.	Host cell interactions of outer membrane vesicle-associated virulence factors of enterohemorrhagic Escherichia coli O157: Intracellular delivery, trafficking and mechanisms of cell injury.	Prokaryote	Escherichia coli	In vitro	Escherichia coli O157:H7 strain 5791/99	Normal	Preclearing (9800 g) > Filtration (0.22 ??m) > Ultracentrifugation (235,000 g) > Iodixanol density gradient ultracentrifugation (288,000 g)	1DE-LC-ESI-MS/MS	54
639	309	281583020102	MV	28158302	PLoS Pathog. 2017 Feb 3;13(2):e1006159. doi: 10.1371/journal.ppat.1006159.	Host cell interactions of outer membrane vesicle-associated virulence factors of enterohemorrhagic Escherichia coli O157: Intracellular delivery, trafficking and mechanisms of cell injury.	Prokaryote	Escherichia coli	In vitro	Escherichia coli O157:H- strain 493/89	Normal	Preclearing (9800 g) > Filtration (0.22 ??m) > Ultracentrifugation (235,000 g) > Iodixanol density gradient ultracentrifugation (288,000 g)	1DE-LC-ESI-MS/MS	57
640	309	281583020103	MV	28158302	PLoS Pathog. 2017 Feb 3;13(2):e1006159. doi: 10.1371/journal.ppat.1006159.	Host cell interactions of outer membrane vesicle-associated virulence factors of enterohemorrhagic Escherichia coli O157: Intracellular delivery, trafficking and mechanisms of cell injury.	Prokaryote	Escherichia coli	In vitro	Escherichia coli O157:H- strain 493/89	??stx2a mutant	Preclearing (9800 g) > Filtration (0.22 ??m) > Ultracentrifugation (235,000 g) > Iodixanol density gradient ultracentrifugation (288,000 g)	1DE-LC-ESI-MS/MS	53
641	140	281605600101	#N/A	28160560	Oncotarget. 2017 Feb 1. doi: 10.18632/oncotarget.14964.	Exosome secretome and mediated signaling in breast cancer patients with nontuberculous mycobacterial disease.	Eukaryote	Homo sapiens	In vivo	Serum	Normal	ExoQuick	1DE-LC-ESI-MS/MS	181
642	140	281605600102	#N/A	28160560	Oncotarget. 2017 Feb 1. doi: 10.18632/oncotarget.14964.	Exosome secretome and mediated signaling in breast cancer patients with nontuberculous mycobacterial disease.	Eukaryote	Homo sapiens	In vivo	Serum	Bronchiectasis non-tuberculosis Mycobacterium-infected	ExoQuick	1DE-LC-ESI-MS/MS	205
643	140	281605600103	#N/A	28160560	Oncotarget. 2017 Feb 1. doi: 10.18632/oncotarget.14964.	Exosome secretome and mediated signaling in breast cancer patients with nontuberculous mycobacterial disease.	Eukaryote	Homo sapiens	In vivo	Serum	Breast cancer-bronchiectasis non-tuberculosis Mycobacterium-infected	ExoQuick	1DE-LC-ESI-MS/MS	320
644	310	282106330101	sEV	28210633	J Immunol Res. 2017;2017:7931982. doi: 10.1155/2017/7931982. Epub 2017 Jan 22.	Potential Usefulness of Streptococcus pneumoniae Extracellular Membrane Vesicles as Antibacterial Vaccines.	Eukaryote	Streptococcus pneumoniae	In vitro	Streptococcus pneumoniae BAA-255	Normal	Preclearing (16,000 g) > Filtration (0.2 ??m) > Concentration (500 kDa) > Ultracentrifugation (150,000 g) > Sucrose cushion ultracentrifugation (200,000 g) > Ultracentrifugation (150,000 g)	1DE-LC-ESI-MS/MS	104
645	101	282115310101	sEV	28211531	Sci Rep. 2017 Feb 17;7:42961. doi: 10.1038/srep42961.	Proteomic analysis of urinary extracellular vesicles from high Gleason score prostate cancer.	Eukaryote	Homo sapiens	In vivo	Urine	Normal	Preclearing (17,000 g) > Ultracentrifugation (100,000 g)	LC-ESI-MS/MS	3525
646	101	282115310102	sEV	28211531	Sci Rep. 2017 Feb 17;7:42961. doi: 10.1038/srep42961.	Proteomic analysis of urinary extracellular vesicles from high Gleason score prostate cancer.	Eukaryote	Homo sapiens	In vivo	Urine	Low-risk prostate cancer (Gleason score 6)	Preclearing (17,000 g) > Ultracentrifugation (100,000 g)	LC-ESI-MS/MS	3525
647	101	282115310103	sEV	28211531	Sci Rep. 2017 Feb 17;7:42961. doi: 10.1038/srep42961.	Proteomic analysis of urinary extracellular vesicles from high Gleason score prostate cancer.	Eukaryote	Homo sapiens	In vivo	Urine	High-risk prostate cancer (Gleason score 8-9)	Preclearing (17,000 g) > Ultracentrifugation (100,000 g)	LC-ESI-MS/MS	3525
648	311	282158640101	#N/A	28215864	Vet Parasitol. 2017 Feb 15;235:29-36. doi: 10.1016/j.vetpar.2017.01.012. Epub 2017 Jan 15.	Regulatory effects of Echinococcus multilocularis extracellular vesicles on RAW264.7 macrophages.	Eukaryote	Echinococcus multilocularis	In vitro	Echinococcus multilocularis	Normal	Preclearing (3200 g) > Filtration (0.2 ??m) > miRCURY Exosome Isolation kit	LC-ESI-MS/MS	428
649	312	282182930101	#N/A	28218293	Sci Rep. 2017 Feb 20;7:42741. doi: 10.1038/srep42741.	Plasma Exosome Profiling of Cancer Patients by a Next Generation Systems Biology Approach.	Eukaryote	Homo sapiens	In vivo	Plasma	PEG precipitation	PEG precipitation	LC-ESI-MS/MS	115
650	313	282182930102	sEV	28218293	Sci Rep. 2017 Feb 20;7:42741. doi: 10.1038/srep42741.	Plasma Exosome Profiling of Cancer Patients by a Next Generation Systems Biology Approach.	Eukaryote	Homo sapiens	In vivo	Plasma	Ultracentrifugation	Preclearing (2000 g, 12,000 g) > Ultracentrifugation (120,000 g)	LC-ESI-MS/MS	128
651	314	282364950101	Both	28236495	Eur J Cell Biol. 2017 Jan 22. pii: S0171-9335(16)30240-0. doi: 10.1016/j.ejcb.2017.01.005.	Microvesicles released from Giardia intestinalis disturb host-pathogen response in vitro.	Eukaryote	Giardia intestinalis	In vitro	Giardia intestinalis WB clone C6	Normal	Preclearing (2500 g, 4000 g) > Ultracentrifugation (100,000 g)	LC-ESI-MS/MS	79
652	315	282646260101	sEV	28264626	Int J Radiat Biol. 2017 Mar 7:1-12. doi: 10.1080/09553002.2017.1294772.	Quantitative changes in the protein and miRNA cargo of plasma exosome-like vesicles after exposure to ionizing radiation.	Eukaryote	Homo sapiens	In vivo	Plasma	Normal	Preclearing (300 g, 2000 g, 10,000 g) > Filtration (0.22 ??m) > Ultracentrifugation (100,000 g)	LC-ESI-MS/MS	209
653	315	282646260102	sEV	28264626	Int J Radiat Biol. 2017 Mar 7:1-12. doi: 10.1080/09553002.2017.1294772.	Quantitative changes in the protein and miRNA cargo of plasma exosome-like vesicles after exposure to ionizing radiation.	Eukaryote	Homo sapiens	In vivo	Plasma	Radiation	Preclearing (300 g, 2000 g, 10,000 g) > Filtration (0.22 ??m) > Ultracentrifugation (100,000 g)	LC-ESI-MS/MS	209
654	194	282848510101	MV	28284851	Microb Pathog. 2017 Mar 9;107:6-11. doi: 10.1016/j.micpath.2017.03.006.	Clostridium difficile-derived membrane vesicles induce the expression of pro-inflammatory cytokine genes and cytotoxicity in colonic epithelial cells in vitro.	Prokaryote	Clostridium difficile	In vitro	Clostridium difficile ATCC 43255	Normal	Preclearing (6000 g) > Filtration (0.2 ??m) > Concentration (100 kDa) > Ultracentrifugation (150,000 g)	1DE-LC-ESI-MS/MS	217
655	316	282887600101	Both	28288760	Vet Parasitol. 2017 Mar 15;236:22-33. doi: 10.1016/j.vetpar.2017.01.022. Epub 2017 Jan 23.	Isolation and characterization of exosomes derived from fertile sheep hydatid cysts.	Eukaryote	Echinococcus granulosus	In vivo	Hydatid cyst fluid	Normal	Preclearing (5000 g) > Filtration (0.22 ??m) > Ultracentrifugation (110,000 g) > Iodixanol density gradient ultracentrifugation (110,000 g) > Ultracentrifugation (110,000 g)	1DE-LC-ESI-MS/MS	661
656	287	283261670101	#N/A	28326167	J Extracell Vesicles. 2016 Dec 23;6(1):1267896. doi: 10.1080/20013078.2016.1267896. eCollection 2017.	Residual urinary extracellular vesicles in ultracentrifugation supernatants after hydrostatic filtration dialysis enrichment.	Eukaryote	Homo sapiens	In vivo	Urine	Normal	Preclearing (2000 g) > Concentration (1000 kDa) > Hydrostatic filtration diaylsis (1000 kDa)	LC-ESI-MS/MS	182
657	317	283310790101	MV	28331079	Clin Vaccine Immunol. 2017 Mar 22. pii: CVI.00557-16. doi: 10.1128/CVI.00557-16.	Characterization and Vaccine Potential of Membrane Vesicles Produced by Francisella noatunensis sup. orientalis in an Adult Zebrafish Model.	Prokaryote	Francisella noatunensis	In vitro	Francisella noatunensis sup. orientalis	Normal	Preclearing (15,000 g) > Filtration (0.45 ??m) > Filtration (0.2 ??m) > Ultracentrifugation (100,000 g)	LC-ESI-MS/MS	224
658	318	283698480101	Both	28369848	J Cell Physiol. 2017 Mar 30. doi: 10.1002/jcp.25935.	End Stage Renal Disease-induced Hypercalcemia May Promote Aortic Valve Calcification via Annexin VI Enrichment of Valve Interstitial Cell Derived-Matrix Vesicles.	Eukaryote	Rattus norvegicus	Ex vivo	Valve interstitial cell	Calcified	Preclearing (3000 g) > Ultracentrifugation (270,000 g)	1DE-LC-ESI-MS/MS	520
659	55	283774120101	sEV	28377412	Sci Signal. 2017 Apr 4;10(473). pii: eaai7696. doi: 10.1126/scisignal.aai7696.	Astrocyte-shed extracellular vesicles regulate the peripheral leukocyte response to inflammatory brain lesions.	Eukaryote	Mus musculus	Ex vivo	Primary cortical astrocyte	Normal	Preclearing (10,000 g) > Ultracentrifugation (100,000 g)	LC-ESI-MS/MS	146
660	55	283774120102	sEV	28377412	Sci Signal. 2017 Apr 4;10(473). pii: eaai7696. doi: 10.1126/scisignal.aai7696.	Astrocyte-shed extracellular vesicles regulate the peripheral leukocyte response to inflammatory brain lesions.	Eukaryote	Mus musculus	Ex vivo	Primary cortical astrocyte	IL-1??-stimulated	Preclearing (10,000 g) > Ultracentrifugation (100,000 g)	LC-ESI-MS/MS	83
661	319	284078050101	sEV	28407805	BMC Vet Res. 2017 Apr 13;13(1):101. doi: 10.1186/s12917-017-1021-8.	Revelation of mRNAs and proteins in porcine milk exosomes by transcriptomic and proteomic analysis.	Eukaryote	Sus scrofa	In vivo	Milk	Normal	Preclearing (2000 g, 12,000 g) > Ultracentrifugation (110,000 g) > Sucrose cushion ultracentrifugation (200,000 g) > Ultracentrifugation (200,000 g)	1DE-LC-ESI-MS/MS	639
662	320	284354690101	sEV	28435469	Theranostics. 2017 Mar 16;7(5):1333-1345. doi: 10.7150/thno.17092. eCollection 2017.	Interleukin 3- receptor targeted exosomes inhibit in vitro and in vivo Chronic Myelogenous Leukemia cell growth.	Eukaryote	Homo sapiens	In vitro	Embryonic kidney cell (HEK293T)	Normal	Preclearing (300 g, 3000 g, 10,000 g) > Ultracentrifugation (100,000 g) > Sucrose cushion ultracentrifugation (100,000 g)	LC-ESI-MS/MS	340
663	320	284354690102	sEV	28435469	Theranostics. 2017 Mar 16;7(5):1333-1345. doi: 10.7150/thno.17092. eCollection 2017.	Interleukin 3- receptor targeted exosomes inhibit in vitro and in vivo Chronic Myelogenous Leukemia cell growth.	Eukaryote	Homo sapiens	In vitro	Embryonic kidney cell (HEK293T)	IL3-Lamp2b-transfected	Preclearing (300 g, 3000 g, 10,000 g) > Ultracentrifugation (100,000 g) > Sucrose cushion ultracentrifugation (100,000 g)	LC-ESI-MS/MS	340
664	321	284473890101	MV	28447389	Environ Microbiol. 2017 Apr 26. doi: 10.1111/1462-2920.13770.	Outer membrane vesicles from Fibrobacter succinogenes S85 contain an array of Carbohydrate-Active Enzymes with versatile polysaccharide-degrading capacity.	Prokaryote	Fibrobacter succinogenes	In vitro	Fibrobacter succinogenes S85 (ATCC 19169)	Normal	Preclearing (9000 g) > Filtration (0.45 ??m) > Concentration (10 kDa) > Concentration (100 kDa) > Preclearing (16,600 g) > Filtration (0.45 ??m) > Sucrose cushion ultracentrifugation (200,000 g) > Ultracentrifugation (100,000 g)	1DE-LC-ESI-MS/MS	347
665	322	284738830101	sEV	28473883	J Extracell Vesicles. 2017 Apr 19;6(1):1302705. doi: 10.1080/20013078.2017.1302705. eCollection 2017.	Characterisation of extracellular vesicle-subsets derived from brain endothelial cells and analysis of their protein cargo modulation after TNF exposure.	Eukaryote	Homo sapiens	In vitro	Cerebral microvascular endothelial cell (hCMEC/D3)	Exosomes	Preclearing (300 g, 2000 g, 18,000 g) > Ultracentrifugation (100,000 g)	LC-ESI-MS/MS	574
666	323	284738830102	lEV	28473883	J Extracell Vesicles. 2017 Apr 19;6(1):1302705. doi: 10.1080/20013078.2017.1302705. eCollection 2017.	Characterisation of extracellular vesicle-subsets derived from brain endothelial cells and analysis of their protein cargo modulation after TNF exposure.	Eukaryote	Homo sapiens	In vitro	Cerebral microvascular endothelial cell (hCMEC/D3)	Microvesicles	Preclearing (300 g, 2000 g) > Ultracentrifugation (18,000 g)	LC-ESI-MS/MS	910
667	324	284738840101	Both	28473884	J Extracell Vesicles. 2017 Apr 10;6(1):1305677. doi: 10.1080/20013078.2017.1305677. eCollection 2017.	Characterisation of adipocyte-derived extracellular vesicle subtypes identifies distinct protein and lipid signatures for large and small extracellular vesicles.	Eukaryote	Mus musculus	In vitro	Adipocyte (3T3-L1)	Total EVs	Preclearing (1500 g) > Ultracentrifugation (100,000 g)	1DE-LC-ESI-MS/MS	192
668	325	284738840102	Both	28473884	J Extracell Vesicles. 2017 Apr 10;6(1):1305677. doi: 10.1080/20013078.2017.1305677. eCollection 2017.	Characterisation of adipocyte-derived extracellular vesicle subtypes identifies distinct protein and lipid signatures for large and small extracellular vesicles.	Eukaryote	Mus musculus	In vitro	Adipocyte (3T3-L1)	Large EVs	Preclearing (1500 g) > Ultracentrifugation (13,000 g) > Sucrose cushion ultracentrifugation (200,000 g) > Ultracentrifugation (100,000 g)	1DE-LC-ESI-MS/MS	422
669	326	284738840103	sEV	28473884	J Extracell Vesicles. 2017 Apr 10;6(1):1305677. doi: 10.1080/20013078.2017.1305677. eCollection 2017.	Characterisation of adipocyte-derived extracellular vesicle subtypes identifies distinct protein and lipid signatures for large and small extracellular vesicles.	Eukaryote	Mus musculus	In vitro	Adipocyte (3T3-L1)	Small EVs	Preclearing (1500 g, 13,000 g) > Ultracentrifugation (100,000 g) > Sucrose cushion ultracentrifugation (200,000 g) > Ultracentrifugation (100,000 g)	1DE-LC-ESI-MS/MS	152
670	239	284760990101	sEV	28476099	BMC Cancer. 2017 May 5;17(1):316. doi: 10.1186/s12885-017-3301-x.	Gamma-glutamyltransferase activity in exosomes as a potential marker for prostate cancer.	Eukaryote	Homo sapiens	In vitro	Prostate cancer cell (LNCaP, androgen-dependent)	Normal	Preclearing (2000 g, 12,000 g) > Filtration (0.22 ??m) > Ultracentrifugation (110,000 g)	LC-MALDI-MS/MS	152
671	239	284760990102	sEV	28476099	BMC Cancer. 2017 May 5;17(1):316. doi: 10.1186/s12885-017-3301-x.	Gamma-glutamyltransferase activity in exosomes as a potential marker for prostate cancer.	Eukaryote	Homo sapiens	In vitro	Prostate cancer cell (C4, partially androgen-independent)	Normal	Preclearing (2000 g, 12,000 g) > Filtration (0.22 ??m) > Ultracentrifugation (110,000 g)	LC-MALDI-MS/MS	152
672	239	284760990103	sEV	28476099	BMC Cancer. 2017 May 5;17(1):316. doi: 10.1186/s12885-017-3301-x.	Gamma-glutamyltransferase activity in exosomes as a potential marker for prostate cancer.	Eukaryote	Homo sapiens	In vitro	Prostate cancer cell (C4-2, androgen-independent)	Normal	Preclearing (2000 g, 12,000 g) > Filtration (0.22 ??m) > Ultracentrifugation (110,000 g)	LC-MALDI-MS/MS	152
673	239	284760990104	sEV	28476099	BMC Cancer. 2017 May 5;17(1):316. doi: 10.1186/s12885-017-3301-x.	Gamma-glutamyltransferase activity in exosomes as a potential marker for prostate cancer.	Eukaryote	Homo sapiens	In vitro	Prostate cancer cell (C4-2B, bone metastatic)	Normal	Preclearing (2000 g, 12,000 g) > Filtration (0.22 ??m) > Ultracentrifugation (110,000 g)	LC-MALDI-MS/MS	152
674	327	284887440101	MV	28488744	Environ Microbiol. 2017 May 10. doi: 10.1111/1462-2920.13793.	Membrane vesicle secretion and prophage induction in multidrug-resistant Stenotrophomonas maltophilia in response to ciprofloxacin stress.	Prokaryote	Stenotrophomonas maltophilia	In vitro	Stenotrophomonas maltophilia strain 44/98 (LMG 26824)	Imipenem-treated	Preclearing (6000 g) > Filtration (0.2 ??m) > Ultracentrifugation (100,000 g)	LC-ESI-MS/MS	184
675	327	284887440102	MV	28488744	Environ Microbiol. 2017 May 10. doi: 10.1111/1462-2920.13793.	Membrane vesicle secretion and prophage induction in multidrug-resistant Stenotrophomonas maltophilia in response to ciprofloxacin stress.	Prokaryote	Stenotrophomonas maltophilia	In vitro	Stenotrophomonas maltophilia strain 44/98 (LMG 26824)	Ciprofloxacin-treated	Preclearing (6000 g) > Filtration (0.2 ??m) > Ultracentrifugation (100,000 g)	LC-ESI-MS/MS	170
676	140	285331100101	#N/A	28533110	Exp Parasitol. 2017 May 19. pii: S0014-4894(17)30079-6. doi: 10.1016/j.exppara.2017.05.003.	Excretory/secretory products from the gastrointestinal nematode Trichuris muris.	Eukaryote	Trichuris muris	In vitro	Trichuris muris	Normal	ExoQuick	LC-ESI-MS/MS	73
677	140	285448110101	#N/A	28544811	Proteomics Clin Appl. 2017 May 25. doi: 10.1002/prca.201700061.	Differential protein expression in exosomal samples taken from trauma patients.	Eukaryote	Homo sapiens	In vivo	Plasma	Trauma patients	ExoQuick	1DE-LC-ESI-MS/MS	171
678	328	285623350101	sEV	28562335	Oncotarget. 2017 May 11. doi: 10.18632/oncotarget.17787.	Urinary exosomes reveal protein signatures in hypertensive patients with albuminuria.	Eukaryote	Homo sapiens	In vivo	Urine	Hypertensive patients under chronic suppression of RAS	Preclearing (17,000 g) > Ultracentrifugation (175,000 g)	1DE-LC-ESI-MS/MS	487
679	329	285855310101	sEV	28585531	Nat Commun. 2017 Jun 6;8:15729. doi: 10.1038/ncomms15728.	Small extracellular vesicles secreted from senescent cells promote cancer cell proliferation through EphA2.	Eukaryote	Homo sapiens	In vitro	Retinal pigment epithelial cell (RPE-1)	Normal	Preclearing (10,000 g) > Filtration (0.22 ??m) > Sucrose cushion ultracentrifugation (100,000 g) > Ultracentrifugation (100,000 g)	1DE-LC-ESI-MS/MS	460
680	329	285855310102	sEV	28585531	Nat Commun. 2017 Jun 6;8:15729. doi: 10.1038/ncomms15728.	Small extracellular vesicles secreted from senescent cells promote cancer cell proliferation through EphA2.	Eukaryote	Homo sapiens	In vitro	Retinal pigment epithelial cell (RPE-1)	Doxorubicin-treated	Preclearing (10,000 g) > Filtration (0.22 ??m) > Sucrose cushion ultracentrifugation (100,000 g) > Ultracentrifugation (100,000 g)	1DE-LC-ESI-MS/MS	650
681	330	285900900101	#N/A	28590090	Proteomics. 2017 Jun 7. doi: 10.1002/pmic.201700103.	Motile hepatocellular carcinoma cells preferentially secret sugar metabolism regulatory proteins via exosomes.	Eukaryote	Homo sapiens	In vitro	Hepatocellular carcinoma cell (Hep3B)	Normal	Preclearing (300 g, 16,500 g) > Filtration (0.22 ??m) > Concentration (100 kDa) > ExoQuick	LC-ESI-MS/MS	1495
682	330	285900900102	#N/A	28590090	Proteomics. 2017 Jun 7. doi: 10.1002/pmic.201700103.	Motile hepatocellular carcinoma cells preferentially secret sugar metabolism regulatory proteins via exosomes.	Eukaryote	Homo sapiens	In vitro	Hepatocellular carcinoma cell (97H)	Normal	Preclearing (300 g, 16,500 g) > Filtration (0.22 ??m) > Concentration (100 kDa) > ExoQuick	LC-ESI-MS/MS	1409
683	330	285900900103	#N/A	28590090	Proteomics. 2017 Jun 7. doi: 10.1002/pmic.201700103.	Motile hepatocellular carcinoma cells preferentially secret sugar metabolism regulatory proteins via exosomes.	Eukaryote	Homo sapiens	In vitro	Hepatocellular carcinoma cell (LM3)	Normal	Preclearing (300 g, 16,500 g) > Filtration (0.22 ??m) > Concentration (100 kDa) > ExoQuick	LC-ESI-MS/MS	1424
684	331	285949240101	sEV	28594924	PLoS One. 2017 Jun 8;12(6):e0178601. doi: 10.1371/journal.pone.0178601. eCollection 2017.	Multiple extracellular vesicle types in peritoneal dialysis effluent are prominent and contain known biomarkers.	Eukaryote	Homo sapiens	In vivo	Peritoneal dialysis effluent	Ultracentrifugation	Preclearing (17,000 g) > Ultracentrifugation (110,000 g)	1DE-LC-ESI-MS/MS	2021
685	332	285949240102	sEV	28594924	PLoS One. 2017 Jun 8;12(6):e0178601. doi: 10.1371/journal.pone.0178601. eCollection 2017.	Multiple extracellular vesicle types in peritoneal dialysis effluent are prominent and contain known biomarkers.	Eukaryote	Homo sapiens	In vivo	Peritoneal dialysis effluent	Size exclusion chromatography	Preclearing (17,000 g) > Ultracentrifugation (110,000 g) > Size exclusion chromatography	1DE-LC-ESI-MS/MS	3076
686	333	286410080101	sEV	28641008	J Proteome Res. 2017 Jun 22. doi: 10.1021/acs.jproteome.7b00144.	Hypoxia-induced changes in the fibroblast secretome, exosome, and whole-cell proteome using cultured, cardiac-derived cells isolated from neonatal mice.	Eukaryote	Mus musculus	Ex vivo	Cardiac fibroblasts	Normal	Preclearing (300 g, 2,000 g, 10,000 g) > Concentration (3 kDa) > Ultracentrifugation (120,000 g)	LC-ESI-MS/MS	1752
687	333	286410080102	sEV	28641008	J Proteome Res. 2017 Jun 22. doi: 10.1021/acs.jproteome.7b00144.	Hypoxia-induced changes in the fibroblast secretome, exosome, and whole-cell proteome using cultured, cardiac-derived cells isolated from neonatal mice.	Eukaryote	Mus musculus	Ex vivo	Cardiac fibroblasts	Hypoxia	Preclearing (300 g, 2,000 g, 10,000 g) > Concentration (3 kDa) > Ultracentrifugation (120,000 g)	LC-ESI-MS/MS	1616
688	334	286439400101	#N/A	28643940	Proteomics. 2017 Jun 23. doi: 10.1002/pmic.201600477.	Proteomic profiling of extracellular vesicles secreted from Toxoplasma gondii.	Eukaryote	Toxoplasma gondii	In vitro	Toxoplasma gondii tachyzoites (RH strain)	Normal	Total Exosome Isolation Reagent	1DE-LC-ESI-MS/MS	438
689	334	286439400102	#N/A	28643940	Proteomics. 2017 Jun 23. doi: 10.1002/pmic.201600477.	Proteomic profiling of extracellular vesicles secreted from Toxoplasma gondii.	Eukaryote	Homo sapiens	In vitro	Foreskin fibroblasts	T. gondii-infected	Total Exosome Isolation Reagent	1DE-LC-ESI-MS/MS	735
690	334	286439400103	#N/A	28643940	Proteomics. 2017 Jun 23. doi: 10.1002/pmic.201600477.	Proteomic profiling of extracellular vesicles secreted from Toxoplasma gondii.	Eukaryote	Homo sapiens	In vitro	Foreskin fibroblasts	Normal	Total Exosome Isolation Reagent	1DE-LC-ESI-MS/MS	573
691	335	286801520101	sEV	28680152	Sci Rep. 2017 Jul 5;7(1):4711. doi: 10.1038/s41598-017-05002-y.	Exosomes from metastatic cancer cells transfer amoeboid phenotype to non-metastatic cells and increase endothelial permeability: their emerging role in tumor heterogeneity.	Eukaryote	Homo sapiens	In vitro	Colorectal cancer cell (SW480)	Normal	Preclearing (2,800 g, 10,000 g) > Ultracentrifugation (100,000 g) > Iodixanol density gradient ultracentrifugation (100,000 g) > Ultracentrifugation (100,000 g)	LC-ESI-MS/MS	489
692	335	286801520102	sEV	28680152	Sci Rep. 2017 Jul 5;7(1):4711. doi: 10.1038/s41598-017-05002-y.	Exosomes from metastatic cancer cells transfer amoeboid phenotype to non-metastatic cells and increase endothelial permeability: their emerging role in tumor heterogeneity.	Eukaryote	Homo sapiens	In vitro	Colorectal cancer cell (SW620)	Normal	Preclearing (2,800 g, 10,000 g) > Ultracentrifugation (100,000 g) > Iodixanol density gradient ultracentrifugation (100,000 g) > Ultracentrifugation (100,000 g)	LC-ESI-MS/MS	489
693	336	287064830101	sEV	28706483	Front Pharmacol. 2017 Jun 29;8:398. doi: 10.3389/fphar.2017.00398. eCollection 2017.	Phytoagent Deoxyelephantopin and Its Derivative Inhibit Triple Negative Breast Cancer Cell Activity through ROS-Mediated Exosomal Activity and Protein Functions.	Eukaryote	Homo sapiens	In vitro	Breast cancer cell (MDA-MB-231)	Normal	Preclearing (300 g, 2,000 g, 16,500 g) > Ultracentrifugation (120,000 g)	SCX-LC-ESI-MS/MS	1729
694	336	287064830102	sEV	28706483	Front Pharmacol. 2017 Jun 29;8:398. doi: 10.3389/fphar.2017.00398. eCollection 2017.	Phytoagent Deoxyelephantopin and Its Derivative Inhibit Triple Negative Breast Cancer Cell Activity through ROS-Mediated Exosomal Activity and Protein Functions.	Eukaryote	Homo sapiens	In vitro	Breast cancer cell (MDA-MB-231)	Deoxyelephantopin (DET)-treated	Preclearing (300 g, 2,000 g, 16,500 g) > Ultracentrifugation (120,000 g)	SCX-LC-ESI-MS/MS	1729
695	336	287064830103	sEV	28706483	Front Pharmacol. 2017 Jun 29;8:398. doi: 10.3389/fphar.2017.00398. eCollection 2017.	Phytoagent Deoxyelephantopin and Its Derivative Inhibit Triple Negative Breast Cancer Cell Activity through ROS-Mediated Exosomal Activity and Protein Functions.	Eukaryote	Homo sapiens	In vitro	Breast cancer cell (MDA-MB-231)	Deoxyelephantopin derivative-35 (DETD-35)-treated	Preclearing (300 g, 2,000 g, 16,500 g) > Ultracentrifugation (120,000 g)	SCX-LC-ESI-MS/MS	1729
696	337	287174160101	Both	28717416	J Extracell Vesicles. 2017 Apr 28;6(1):1313091. doi: 10.1080/20013078.2017.1313091. eCollection 2017.	Feasibility of urinary extracellular vesicle proteome profiling using a robust and simple, clinically applicable isolation method.	Eukaryote	Homo sapiens	In vivo	Urine	Normal	Preclearing (500 g, 2,000 g) > Concentration (100 kDa) > Centrifugation (16,000 g) > Ultracentrifugation (100,000 g)	1DE-LC-ESI-MS/MS	1650
697	338	287174160102	lEV	28717416	J Extracell Vesicles. 2017 Apr 28;6(1):1313091. doi: 10.1080/20013078.2017.1313091. eCollection 2017.	Feasibility of urinary extracellular vesicle proteome profiling using a robust and simple, clinically applicable isolation method.	Eukaryote	Homo sapiens	In vivo	Urine	Normal	Preclearing (500 g, 2,000 g) > Concentration (100 kDa) > Centrifugation (16,000 g) > Vn96-peptide incubation	1DE-LC-ESI-MS/MS	1873
698	339	287174160103	lEV	28717416	J Extracell Vesicles. 2017 Apr 28;6(1):1313091. doi: 10.1080/20013078.2017.1313091. eCollection 2017.	Feasibility of urinary extracellular vesicle proteome profiling using a robust and simple, clinically applicable isolation method.	Eukaryote	Homo sapiens	In vivo	Urine	Normal	Preclearing (500 g, 2,000 g) > NP-40 treatment > Concentration (100 kDa) > Centrifugation (16,000 g) > Vn96-peptide incubation	1DE-LC-ESI-MS/MS	1943
699	227	287223410101	sEV	28722341	Proteomics. 2017 Jul 19. doi: 10.1002/pmic.201600430.	Proteomic analysis of neuroblastoma-derived exosomes: new insights into a metastatic signature.	Eukaryote	Homo sapiens	In vitro	Neuroblastoma cell (IMR32)	Normal	Preclearing (500 g, 12,000 g) > Ultracentrifugation (100,000 g)	LC-ESI-MS/MS	2820
700	227	287223410102	sEV	28722341	Proteomics. 2017 Jul 19. doi: 10.1002/pmic.201600430.	Proteomic analysis of neuroblastoma-derived exosomes: new insights into a metastatic signature.	Eukaryote	Homo sapiens	In vitro	Neuroblastoma cell (SK-N-SH)	Normal	Preclearing (500 g, 12,000 g) > Ultracentrifugation (100,000 g)	LC-ESI-MS/MS	3908
701	227	287223410103	sEV	28722341	Proteomics. 2017 Jul 19. doi: 10.1002/pmic.201600430.	Proteomic analysis of neuroblastoma-derived exosomes: new insights into a metastatic signature.	Eukaryote	Homo sapiens	In vitro	Neuroblastoma cell (SH-SY5Y)	Normal	Preclearing (500 g, 12,000 g) > Ultracentrifugation (100,000 g)	LC-ESI-MS/MS	4032
702	227	287223410104	sEV	28722341	Proteomics. 2017 Jul 19. doi: 10.1002/pmic.201600430.	Proteomic analysis of neuroblastoma-derived exosomes: new insights into a metastatic signature.	Eukaryote	Homo sapiens	In vitro	Neuroblastoma cell (SKNBe2c)	Normal	Preclearing (500 g, 12,000 g) > Ultracentrifugation (100,000 g)	LC-ESI-MS/MS	2202
703	227	287223410105	sEV	28722341	Proteomics. 2017 Jul 19. doi: 10.1002/pmic.201600430.	Proteomic analysis of neuroblastoma-derived exosomes: new insights into a metastatic signature.	Eukaryote	Homo sapiens	In vitro	Neuroblastoma cell (LAN-1)	Normal	Preclearing (500 g, 12,000 g) > Ultracentrifugation (100,000 g)	LC-ESI-MS/MS	2564
704	227	287223410106	sEV	28722341	Proteomics. 2017 Jul 19. doi: 10.1002/pmic.201600430.	Proteomic analysis of neuroblastoma-derived exosomes: new insights into a metastatic signature.	Eukaryote	Homo sapiens	Ex vivo	Neuroblastoma cell (IGR-NB8)	Normal	Preclearing (500 g, 12,000 g) > Ultracentrifugation (100,000 g)	LC-ESI-MS/MS	2366
705	227	287223410107	sEV	28722341	Proteomics. 2017 Jul 19. doi: 10.1002/pmic.201600430.	Proteomic analysis of neuroblastoma-derived exosomes: new insights into a metastatic signature.	Eukaryote	Homo sapiens	Ex vivo	Neuroblastoma cell (IGR-N91)	Normal	Preclearing (500 g, 12,000 g) > Ultracentrifugation (100,000 g)	LC-ESI-MS/MS	2323
706	227	287223410108	sEV	28722341	Proteomics. 2017 Jul 19. doi: 10.1002/pmic.201600430.	Proteomic analysis of neuroblastoma-derived exosomes: new insights into a metastatic signature.	Eukaryote	Homo sapiens	Ex vivo	Neuroblastoma cell (CHLA255)	Normal	Preclearing (500 g, 12,000 g) > Ultracentrifugation (100,000 g)	LC-ESI-MS/MS	2846
707	340	287227860101	#N/A	28722786	Proteomics. 2017 Jul 19. doi: 10.1002/pmic.201600432.	Oncogenic transformation of lung cells results in distinct exosome protein profile similar to the cell of origin.	Eukaryote	Homo sapiens	In vitro	Bronchial epithelial cell (30KT)	Normal	Preclearing (300 g) > Filtration (0.22 ??m) > Concentration (100 kDa) > qEV size exclusion column > Concentration (10 kDa)	LC-ESI-MS/MS	1426
708	340	287227860102	#N/A	28722786	Proteomics. 2017 Jul 19. doi: 10.1002/pmic.201600432.	Oncogenic transformation of lung cells results in distinct exosome protein profile similar to the cell of origin.	Eukaryote	Homo sapiens	In vitro	Bronchial epithelial cell (30KT)	p53 knock-down and EGFR L858R point mutation	Preclearing (300 g) > Filtration (0.22 ??m) > Concentration (100 kDa) > qEV size exclusion column > Concentration (10 kDa)	LC-ESI-MS/MS	1426
709	341	287250210101	sEV	28725021	Sci Rep. 2017 Jul 19;7(1):5933. doi: 10.1038/s41598-017-06288-8.	Bovine milk-derived exosomes from colostrum are enriched with proteins implicated in immune response and growth.	Eukaryote	Bos taurus	In vivo	Milk	Mature milk	Preclearing (5,000 g, 12,000 g, 35,000 g, 70,000 g) > Ultracentrifugation (100,000 g) > Iodixanol density gradient ultracentrifugation (100,000 g) > Ultracentrifugation (100,000 g)	1DE-LC-ESI-MS/MS	3631
710	341	287250210102	sEV	28725021	Sci Rep. 2017 Jul 19;7(1):5933. doi: 10.1038/s41598-017-06288-8.	Bovine milk-derived exosomes from colostrum are enriched with proteins implicated in immune response and growth.	Eukaryote	Bos taurus	In vivo	Milk	Colostrum collected within 24 h of calving	Preclearing (5,000 g, 12,000 g, 35,000 g, 70,000 g) > Ultracentrifugation (100,000 g) > Iodixanol density gradient ultracentrifugation (100,000 g) > Ultracentrifugation (100,000 g)	1DE-LC-ESI-MS/MS	3654
711	341	287250210103	sEV	28725021	Sci Rep. 2017 Jul 19;7(1):5933. doi: 10.1038/s41598-017-06288-8.	Bovine milk-derived exosomes from colostrum are enriched with proteins implicated in immune response and growth.	Eukaryote	Bos taurus	In vivo	Milk	Colostrum collected within 48 h of calving	Preclearing (5,000 g, 12,000 g, 35,000 g, 70,000 g) > Ultracentrifugation (100,000 g) > Iodixanol density gradient ultracentrifugation (100,000 g) > Ultracentrifugation (100,000 g)	1DE-LC-ESI-MS/MS	4145
712	341	287250210104	sEV	28725021	Sci Rep. 2017 Jul 19;7(1):5933. doi: 10.1038/s41598-017-06288-8.	Bovine milk-derived exosomes from colostrum are enriched with proteins implicated in immune response and growth.	Eukaryote	Bos taurus	In vivo	Milk	Colostrum collected within 72 h of calving	Preclearing (5,000 g, 12,000 g, 35,000 g, 70,000 g) > Ultracentrifugation (100,000 g) > Iodixanol density gradient ultracentrifugation (100,000 g) > Ultracentrifugation (100,000 g)	1DE-LC-ESI-MS/MS	3006
713	342	287458250101	MV	28745825	J Basic Microbiol. 2017 Jul 26. doi: 10.1002/jobm.201700153.	Salmonella Choleraesuis outer membrane vesicles: Proteomics and immunogenicity.	Prokaryote	Salmonella enterica	In vitro	Salmonella enterica serovar Choleraesuis strain chi3545	Normal	Preclearing (10,000 g) > Filtration (0.45 ??m) > Ultracentrifugation (40,000 g) > Filtration (0.45 ??m) > Iodixanol density gradient ultracentrifugation (150,000 g) > Ultracentrifugation (40,000 g)	1DE-LC-ESI-MS/MS	192
714	343	288116100101	lEV	28811610	Sci Rep. 2017 Aug 15;7(1):8202. doi: 10.1038/s41598-017-08392-1.	Antibiotic-induced release of small extracellular vesicles (exosomes) with surface-associated DNA.	Eukaryote	Homo sapiens	In vitro	T cell (Jurkat)	Control_microvesicles	Preclearing (300 g, 2,000 g) > Filtration (0.8 ??m) > Centrifugation (12,500 g)	LC-ESI-MS/MS	187
715	344	288116100102	Both	28811610	Sci Rep. 2017 Aug 15;7(1):8202. doi: 10.1038/s41598-017-08392-1.	Antibiotic-induced release of small extracellular vesicles (exosomes) with surface-associated DNA.	Eukaryote	Homo sapiens	In vitro	T cell (Jurkat)	Control_exosomes	Preclearing (300 g, 2,000 g) > Filtration (0.8 ??m) > Centrifugation (12,500 g) > Filtration (0.2 ??m) > Ultracentrifugation (100,000 g) > Iodixanol density gradient ultracentrifugation (100,000 g) > Ultracentrifugation (100,000 g)	LC-ESI-MS/MS	169
716	343	288116100103	lEV	28811610	Sci Rep. 2017 Aug 15;7(1):8202. doi: 10.1038/s41598-017-08392-1.	Antibiotic-induced release of small extracellular vesicles (exosomes) with surface-associated DNA.	Eukaryote	Homo sapiens	In vitro	T cell (Jurkat)	Activated_microvesicles	Preclearing (300 g, 2,000 g) > Filtration (0.8 ??m) > Centrifugation (12,500 g)	LC-ESI-MS/MS	231
717	344	288116100104	Both	28811610	Sci Rep. 2017 Aug 15;7(1):8202. doi: 10.1038/s41598-017-08392-1.	Antibiotic-induced release of small extracellular vesicles (exosomes) with surface-associated DNA.	Eukaryote	Homo sapiens	In vitro	T cell (Jurkat)	Activated_exosomes	Preclearing (300 g, 2,000 g) > Filtration (0.8 ??m) > Centrifugation (12,500 g) > Filtration (0.2 ??m) > Ultracentrifugation (100,000 g) > Iodixanol density gradient ultracentrifugation (100,000 g) > Ultracentrifugation (100,000 g)	LC-ESI-MS/MS	386
718	343	288116100105	lEV	28811610	Sci Rep. 2017 Aug 15;7(1):8202. doi: 10.1038/s41598-017-08392-1.	Antibiotic-induced release of small extracellular vesicles (exosomes) with surface-associated DNA.	Eukaryote	Homo sapiens	In vitro	T cell (Jurkat)	Apoptotic_microvesicles	Preclearing (300 g, 2,000 g) > Filtration (0.8 ??m) > Centrifugation (12,500 g)	LC-ESI-MS/MS	389
719	344	288116100106	Both	28811610	Sci Rep. 2017 Aug 15;7(1):8202. doi: 10.1038/s41598-017-08392-1.	Antibiotic-induced release of small extracellular vesicles (exosomes) with surface-associated DNA.	Eukaryote	Homo sapiens	In vitro	T cell (Jurkat)	Apoptotic_exosomes	Preclearing (300 g, 2,000 g) > Filtration (0.8 ??m) > Centrifugation (12,500 g) > Filtration (0.2 ??m) > Ultracentrifugation (100,000 g) > Iodixanol density gradient ultracentrifugation (100,000 g) > Ultracentrifugation (100,000 g)	LC-ESI-MS/MS	179
720	345	288195500101	sEV	28819550	J Extracell Vesicles. 2017 Aug 13;6(1):1359478. doi: 10.1080/20013078.2017.1359478. eCollection 2017.	Effects of storage temperature on airway exosome integrity for diagnostic and functional analyses.	Eukaryote	Mus musculus	In vivo	Bronchoalveolar lavage fluid	Freshly isolated	Preclearing (400 g, 2,000 g, 10,000 g) > Ultracentrifugation (100,000 g)	LC-ESI-MS/MS	1052
721	345	288195500102	sEV	28819550	J Extracell Vesicles. 2017 Aug 13;6(1):1359478. doi: 10.1080/20013078.2017.1359478. eCollection 2017.	Effects of storage temperature on airway exosome integrity for diagnostic and functional analyses.	Eukaryote	Mus musculus	In vivo	Bronchoalveolar lavage fluid	4oC storage	Preclearing (400 g, 2,000 g, 10,000 g) > Ultracentrifugation (100,000 g)	LC-ESI-MS/MS	1052
722	345	288195500103	sEV	28819550	J Extracell Vesicles. 2017 Aug 13;6(1):1359478. doi: 10.1080/20013078.2017.1359478. eCollection 2017.	Effects of storage temperature on airway exosome integrity for diagnostic and functional analyses.	Eukaryote	Mus musculus	In vivo	Bronchoalveolar lavage fluid	-80oC storage	Preclearing (400 g, 2,000 g, 10,000 g) > Ultracentrifugation (100,000 g)	LC-ESI-MS/MS	1052
723	346	288261830101	Both	28826183	J Alzheimers Dis. 2017 Aug 17. doi: 10.3233/JAD-170278.	Increased Release of Apolipoprotein E in Extracellular Vesicles Following Amyloid-beta Protofibril Exposure of Neuroglial Co-Cultures.	Eukaryote	Mus musculus	Ex vivo	Cerebral cortical neural cells	Amyloid-beta42 protofibril-exposed	Preclearing (300 g, 2,000 g) > Ultracentrifugation (135,000 g)	LC-ESI-MS/MS	807
724	347	288429680101	Both	28842968	Proteomics. 2017 Aug 26. doi: 10.1002/pmic.201600371.	Insulin mediated activation of PI3K/Akt signalling pathway modifies the proteomic cargo of extracellular vesicles.	Eukaryote	Homo sapiens	In vitro	Colorectal cancer cell (LIM1215)	Insulin-induced	Preclearing (500 g, 2,000 g) > Ultracentrifugation (100,000 g)	1DE-LC-ESI-MS/MS	1786
725	347	288429680102	Both	28842968	Proteomics. 2017 Aug 26. doi: 10.1002/pmic.201600371.	Insulin mediated activation of PI3K/Akt signalling pathway modifies the proteomic cargo of extracellular vesicles.	Eukaryote	Homo sapiens	In vitro	Colorectal cancer cell (LIM1215)	Serum-starved	Preclearing (500 g, 2,000 g) > Ultracentrifugation (100,000 g)	1DE-LC-ESI-MS/MS	1811
726	348	289145000101	sEV	28914500	Andrology. 2017 Sep;5(5):1007-1015. doi: 10.1111/andr.12412.	Comprehensive proteomics analysis of exosomes derived from human seminal plasma.	Eukaryote	Homo sapiens	In vivo	Seminal plasma	Normal	Preclearing (1,000 g, 2,400 g, 12,000 g) > Filtration (0.45 ??m, 0.22 ??m) > Ultracentrifugation (100,000 g) > Sucrose cushion ultracentrifugation (100,000 g)	LC-ESI-MS/MS	1466
727	349	289318230101	MV	28931823	Nat Commun. 2017 Sep 20;8(1):626. doi: 10.1038/s41467-017-00729-8.	Bacterial outer membrane vesicles suppress tumor by interferon-gamma-mediated antitumor response.	Prokaryote	Escherichia coli	In vitro	Escherichia coli W3110	??msbB	Preclearing (6,000 g) > Filtration (0.45 ??m) > Concentration (100 kDa) > Filtration (0.22 ??m) > Ultracentrifugation (150,000 g) > Iodixanol density gradient ultracentrifugation (200,000 g) > Filtration (0.22 ??m)	LC-ESI-MS/MS	200
728	349	289318230102	MV	28931823	Nat Commun. 2017 Sep 20;8(1):626. doi: 10.1038/s41467-017-00729-8.	Bacterial outer membrane vesicles suppress tumor by interferon-gamma-mediated antitumor response.	Prokaryote	Staphylococcus aureus	In vitro	Staphylococcus aureus RN4220	Normal	Preclearing (6,000 g) > Filtration (0.45 ??m) > Concentration (100 kDa) > Filtration (0.22 ??m) > Ultracentrifugation (150,000 g) > Iodixanol density gradient ultracentrifugation (200,000 g) > Filtration (0.22 ??m)	LC-ESI-MS/MS	476
729	350	289443000101	sEV	28944300	Wellcome Open Res. 2017 Jul 17;2:50. doi: 10.12688/wellcomeopenres.11910.1. eCollection 2017.	Proteomic analysis of extracellular vesicles from a Plasmodium falciparum Kenyan clinical isolate defines a core parasite secretome.	Eukaryote	Plasmodium falciparum	In vitro	Plasmodium falciparum 9605	Normal	Preclearing (440 g, 2,000 g, 3,600 g, 15,000 g) > Filtration (0.2 ??m) > Ultracentrifugation (150,000 g) > Iodixanol density gradient ultracentrifugation (250,000 g) > Ultracentrifugation (150,000 g)	1DE-LC-ESI-MS/MS	153
730	377	289635520101	sEV	28963552	Sci Rep. 2017 Sep 29;7(1):12423. doi: 10.1038/s41598-017-12403-6.	Radiation alters the cargo of exosomes released from squamous head and neck cancer cells to promote migration of recipient cells.	Eukaryote	Homo sapiens	In vitro	Oral squamous cell carcinoma cell (BHY)	Normal	Preclearing (10,000 g) > Filtration (0.22 ??m) > Ultracentrifugation (100,000 g)	LC-ESI-MS/MS	686
731	377	289635520102	sEV	28963552	Sci Rep. 2017 Sep 29;7(1):12423. doi: 10.1038/s41598-017-12403-6.	Radiation alters the cargo of exosomes released from squamous head and neck cancer cells to promote migration of recipient cells.	Eukaryote	Homo sapiens	In vitro	Oral squamous cell carcinoma cell (BHY)	Irradiated (6 Gy)	Preclearing (10,000 g) > Filtration (0.22 ??m) > Ultracentrifugation (100,000 g)	LC-ESI-MS/MS	687
732	351	289747470101	sEV	28974747	Sci Rep. 2017 Oct 3;7(1):12639. doi: 10.1038/s41598-017-13027-6.	Annexin-enriched osteoblast-derived vesicles act as an extracellular site of mineral nucleation within developing stem cell cultures.	Eukaryote	Mus musculus	In vitro	Osteoblast (MC3T3)	Non-mineralizing	Preclearing (2,000 g, 10,000 g) > Ultracentrifugation (120,000 g)	LC-ESI-MS/MS	120
733	351	289747470102	sEV	28974747	Sci Rep. 2017 Oct 3;7(1):12639. doi: 10.1038/s41598-017-13027-6.	Annexin-enriched osteoblast-derived vesicles act as an extracellular site of mineral nucleation within developing stem cell cultures.	Eukaryote	Mus musculus	In vitro	Osteoblast (MC3T3)	Mineralizing	Preclearing (2,000 g, 10,000 g) > Ultracentrifugation (120,000 g)	LC-ESI-MS/MS	151
734	352	289865850101	Both	28986585	Sci Rep. 2017 Oct 6;7(1):12782. doi: 10.1038/s41598-017-13092-x.	Quantitation of putative colorectal cancer biomarker candidates in serum extracellular vesicles by targeted proteomics.	Eukaryote	Homo sapiens	In vivo	Serum	Colorectal cancer	Preclearing (300 g) > Filtration (0.22 ??m) > Sucrose cushion ultracentrifugation (100,000 g) > Ultracentrifugation (100,000 g)	LC-ESI-MS/MS	669
735	352	289865850102	Both	28986585	Sci Rep. 2017 Oct 6;7(1):12782. doi: 10.1038/s41598-017-13092-x.	Quantitation of putative colorectal cancer biomarker candidates in serum extracellular vesicles by targeted proteomics.	Eukaryote	Homo sapiens	In vitro	Colorectal cancer cells (HCT116, DLD1, SW480, SW620)	Normal	Preclearing (300 g) > Filtration (0.22 ??m) > Sucrose cushion ultracentrifugation (100,000 g) > Ultracentrifugation (100,000 g)	LC-ESI-MS/MS	4749
736	353	290342150101	MV	29034215	Front Cell Infect Microbiol. 2017 Sep 28;7:420. doi: 10.3389/fcimb.2017.00420. eCollection 2017.	The Proteome of Biologically Active Membrane Vesicles from Piscirickettsia salmonis LF-89 Type Strain Identifies Plasmid-Encoded Putative Toxins.	Prokaryote	Piscirickettsia salmonis	In vitro	Piscirickettsia salmonis ATCC VR-1361	Normal	Preclearing (5,000 g) > Filtration (0.45 ??m, 0.22 ??m) > Ultracentrifugation (125,000 g)	1DE-LC-ESI-MS/MS	144
737	354	290455050101	Both	29045505	Ann Oncol. 2017 Sep 25. doi: 10.1093/annonc/mdx542.	Surfaceome profiling enables isolation of cancer-specific exosomal cargo in liquid biopsies from pancreatic cancer patients.	Eukaryote	Homo sapiens	In vitro	Pancreatic ductal adenocarcinoma cell (Pa01C)	Normal	Preclearing (1,000 rpm, 5,000 rpm) > Filtration (0.22 ??m) > Ultracentrifugation (154,000 g)	LC-ESI-MS/MS	1391
738	354	290455050102	Both	29045505	Ann Oncol. 2017 Sep 25. doi: 10.1093/annonc/mdx542.	Surfaceome profiling enables isolation of cancer-specific exosomal cargo in liquid biopsies from pancreatic cancer patients.	Eukaryote	Homo sapiens	In vitro	Pancreatic ductal adenocarcinoma cell (Pa02C)	Normal	Preclearing (1,000 rpm, 5,000 rpm) > Filtration (0.22 ??m) > Ultracentrifugation (154,000 g)	LC-ESI-MS/MS	302
739	354	290455050103	Both	29045505	Ann Oncol. 2017 Sep 25. doi: 10.1093/annonc/mdx542.	Surfaceome profiling enables isolation of cancer-specific exosomal cargo in liquid biopsies from pancreatic cancer patients.	Eukaryote	Homo sapiens	In vitro	Pancreatic ductal adenocarcinoma cell (Pa03C)	Normal	Preclearing (1,000 rpm, 5,000 rpm) > Filtration (0.22 ??m) > Ultracentrifugation (154,000 g)	LC-ESI-MS/MS	1674
740	354	290455050104	Both	29045505	Ann Oncol. 2017 Sep 25. doi: 10.1093/annonc/mdx542.	Surfaceome profiling enables isolation of cancer-specific exosomal cargo in liquid biopsies from pancreatic cancer patients.	Eukaryote	Homo sapiens	In vitro	Pancreatic ductal adenocarcinoma cell (Pa04C)	Normal	Preclearing (1,000 rpm, 5,000 rpm) > Filtration (0.22 ??m) > Ultracentrifugation (154,000 g)	LC-ESI-MS/MS	1120
741	354	290455050105	Both	29045505	Ann Oncol. 2017 Sep 25. doi: 10.1093/annonc/mdx542.	Surfaceome profiling enables isolation of cancer-specific exosomal cargo in liquid biopsies from pancreatic cancer patients.	Eukaryote	Homo sapiens	In vitro	Pancreatic ductal adenocarcinoma cell (Pa07C)	Normal	Preclearing (1,000 rpm, 5,000 rpm) > Filtration (0.22 ??m) > Ultracentrifugation (154,000 g)	LC-ESI-MS/MS	651
742	354	290455050106	Both	29045505	Ann Oncol. 2017 Sep 25. doi: 10.1093/annonc/mdx542.	Surfaceome profiling enables isolation of cancer-specific exosomal cargo in liquid biopsies from pancreatic cancer patients.	Eukaryote	Homo sapiens	In vitro	Pancreatic ductal adenocarcinoma cell (Pa08C)	Normal	Preclearing (1,000 rpm, 5,000 rpm) > Filtration (0.22 ??m) > Ultracentrifugation (154,000 g)	LC-ESI-MS/MS	586
743	354	290455050107	Both	29045505	Ann Oncol. 2017 Sep 25. doi: 10.1093/annonc/mdx542.	Surfaceome profiling enables isolation of cancer-specific exosomal cargo in liquid biopsies from pancreatic cancer patients.	Eukaryote	Homo sapiens	In vitro	Pancreatic ductal adenocarcinoma cell (Pa09C)	Normal	Preclearing (1,000 rpm, 5,000 rpm) > Filtration (0.22 ??m) > Ultracentrifugation (154,000 g)	LC-ESI-MS/MS	767
744	354	290455050108	Both	29045505	Ann Oncol. 2017 Sep 25. doi: 10.1093/annonc/mdx542.	Surfaceome profiling enables isolation of cancer-specific exosomal cargo in liquid biopsies from pancreatic cancer patients.	Eukaryote	Homo sapiens	In vitro	Pancreatic ductal adenocarcinoma cell (Pa21C)	Normal	Preclearing (1,000 rpm, 5,000 rpm) > Filtration (0.22 ??m) > Ultracentrifugation (154,000 g)	LC-ESI-MS/MS	1450
745	354	290455050109	Both	29045505	Ann Oncol. 2017 Sep 25. doi: 10.1093/annonc/mdx542.	Surfaceome profiling enables isolation of cancer-specific exosomal cargo in liquid biopsies from pancreatic cancer patients.	Eukaryote	Homo sapiens	In vitro	Pancreatic ductal adenocarcinoma cell (Pa28C)	Normal	Preclearing (1,000 rpm, 5,000 rpm) > Filtration (0.22 ??m) > Ultracentrifugation (154,000 g)	LC-ESI-MS/MS	1033
746	354	290455050110	Both	29045505	Ann Oncol. 2017 Sep 25. doi: 10.1093/annonc/mdx542.	Surfaceome profiling enables isolation of cancer-specific exosomal cargo in liquid biopsies from pancreatic cancer patients.	Eukaryote	Homo sapiens	In vitro	Pancreatic ductal adenocarcinoma cell (PATC43)	Normal	Preclearing (1,000 rpm, 5,000 rpm) > Filtration (0.22 ??m) > Ultracentrifugation (154,000 g)	LC-ESI-MS/MS	281
747	354	290455050111	Both	29045505	Ann Oncol. 2017 Sep 25. doi: 10.1093/annonc/mdx542.	Surfaceome profiling enables isolation of cancer-specific exosomal cargo in liquid biopsies from pancreatic cancer patients.	Eukaryote	Homo sapiens	In vitro	Pancreatic ductal adenocarcinoma cell (PATC66)	Normal	Preclearing (1,000 rpm, 5,000 rpm) > Filtration (0.22 ??m) > Ultracentrifugation (154,000 g)	LC-ESI-MS/MS	289
748	354	290455050112	Both	29045505	Ann Oncol. 2017 Sep 25. doi: 10.1093/annonc/mdx542.	Surfaceome profiling enables isolation of cancer-specific exosomal cargo in liquid biopsies from pancreatic cancer patients.	Eukaryote	Homo sapiens	In vitro	Pancreatic ductal adenocarcinoma cell (PATC92)	Normal	Preclearing (1,000 rpm, 5,000 rpm) > Filtration (0.22 ??m) > Ultracentrifugation (154,000 g)	LC-ESI-MS/MS	285
749	354	290455050113	Both	29045505	Ann Oncol. 2017 Sep 25. doi: 10.1093/annonc/mdx542.	Surfaceome profiling enables isolation of cancer-specific exosomal cargo in liquid biopsies from pancreatic cancer patients.	Eukaryote	Homo sapiens	In vitro	Pancreatic ductal adenocarcinoma cell (MiaPaCa2)	Normal	Preclearing (1,000 rpm, 5,000 rpm) > Filtration (0.22 ??m) > Ultracentrifugation (154,000 g)	LC-ESI-MS/MS	611
750	354	290455050114	Both	29045505	Ann Oncol. 2017 Sep 25. doi: 10.1093/annonc/mdx542.	Surfaceome profiling enables isolation of cancer-specific exosomal cargo in liquid biopsies from pancreatic cancer patients.	Eukaryote	Homo sapiens	In vitro	Fibroblast (CAF19)	Normal	Preclearing (1,000 rpm, 5,000 rpm) > Filtration (0.22 ??m) > Ultracentrifugation (154,000 g)	LC-ESI-MS/MS	886
751	354	290455050115	Both	29045505	Ann Oncol. 2017 Sep 25. doi: 10.1093/annonc/mdx542.	Surfaceome profiling enables isolation of cancer-specific exosomal cargo in liquid biopsies from pancreatic cancer patients.	Eukaryote	Homo sapiens	In vitro	Pancreatic ductal epithelial cell (HPNE)	Normal	Preclearing (1,000 rpm, 5,000 rpm) > Filtration (0.22 ??m) > Ultracentrifugation (154,000 g)	LC-ESI-MS/MS	2627
752	355	290705270101	sEV	29070527	Clin Cancer Res. 2017 Oct 25. pii: clincanres.2046.2017. doi: 10.1158/1078-0432.CCR-17-2046.	Extracellular vesicles released by cardiomyocytes in a doxorubicin-induced cardiac injury mouse model contain protein biomarkers of early cardiac injury.	Eukaryote	Mus musculus	In vivo	Serum	Normal	Preclearing (1,200 g, 12,000 g, 20,000 g) > Sucrose cushion ultracentrifugation (100,000 g) > Ultracentrifugation (100,000 g)	1DE-LC-ESI-MS/MS	201
753	355	290705270102	sEV	29070527	Clin Cancer Res. 2017 Oct 25. pii: clincanres.2046.2017. doi: 10.1158/1078-0432.CCR-17-2046.	Extracellular vesicles released by cardiomyocytes in a doxorubicin-induced cardiac injury mouse model contain protein biomarkers of early cardiac injury.	Eukaryote	Mus musculus	In vivo	Serum	Doxorubicin-treated	Preclearing (1,200 g, 12,000 g, 20,000 g) > Sucrose cushion ultracentrifugation (100,000 g) > Ultracentrifugation (100,000 g)	1DE-LC-ESI-MS/MS	203
754	356	291142230101	sEV	29114223	Front Pharmacol. 2017 Oct 24;8:748. doi: 10.3389/fphar.2017.00748. eCollection 2017.	The Human Amnion Epithelial Cell Secretome Decreases Hepatic Fibrosis in Mice with Chronic Liver Fibrosis.	Eukaryote	Homo sapiens	Ex vivo	Amnion epithelial cell	Normal	Preclearing (300 g, 2,000 g, 10,000 g) > Ultracentrifugation (110,000 g)	LC-ESI-MS/MS	231
755	357	291157120101	sEV	29115712	Proteomics. 2017 Nov 8. doi: 10.1002/pmic.201600370.	Proteomic profiling of exosomes secreted by breast cancer cells with varying metastatic potential.	Eukaryote	Mus musculus	In vitro	Breast cancer cell (67NR)	Normal	Preclearing (500 g, 2,000 g, 10,000 g) > Ultracentrifugation (100,000 g)	1DE-LC-ESI-MS/MS	1760
756	357	291157120102	sEV	29115712	Proteomics. 2017 Nov 8. doi: 10.1002/pmic.201600370.	Proteomic profiling of exosomes secreted by breast cancer cells with varying metastatic potential.	Eukaryote	Mus musculus	In vitro	Breast cancer cell (66cl4)	Normal	Preclearing (500 g, 2,000 g, 10,000 g) > Ultracentrifugation (100,000 g)	1DE-LC-ESI-MS/MS	1241
757	357	291157120103	sEV	29115712	Proteomics. 2017 Nov 8. doi: 10.1002/pmic.201600370.	Proteomic profiling of exosomes secreted by breast cancer cells with varying metastatic potential.	Eukaryote	Mus musculus	In vitro	Breast cancer cell (4T1)	Normal	Preclearing (500 g, 2,000 g, 10,000 g) > Ultracentrifugation (100,000 g)	1DE-LC-ESI-MS/MS	1344
758	357	291157120104	sEV	29115712	Proteomics. 2017 Nov 8. doi: 10.1002/pmic.201600370.	Proteomic profiling of exosomes secreted by breast cancer cells with varying metastatic potential.	Eukaryote	Mus musculus	In vitro	Breast cancer cell (4T1.2)	Normal	Preclearing (500 g, 2,000 g, 10,000 g) > Ultracentrifugation (100,000 g)	1DE-LC-ESI-MS/MS	1535
759	358	291274100101	#N/A	29127410	Sci Rep. 2017 Nov 10;7(1):15297. doi: 10.1038/s41598-017-15717-7.	Ultrafiltration combined with size exclusion chromatography efficiently isolates extracellular vesicles from cell culture media for compositional and functional studies.	Eukaryote	Homo sapiens	In vitro	Bronchial epithelial cell (BEAS2B)	Ultrafiltration-size exclusion chromatography	Preclearing (300 g, 5,000 g) > Filtration (0.22 ??m) > Concentration (10 kDa) > Size exclusion chromatography > Concentration (10 kDa)	LC-ESI-MS/MS	377
760	359	291274100102	Both	29127410	Sci Rep. 2017 Nov 10;7(1):15297. doi: 10.1038/s41598-017-15717-7.	Ultrafiltration combined with size exclusion chromatography efficiently isolates extracellular vesicles from cell culture media for compositional and functional studies.	Eukaryote	Homo sapiens	In vitro	Bronchial epithelial cell (BEAS2B)	Ultracentrifugation	Preclearing (300 g, 5,000 g) > Filtration (0.22 ??m) > Ultracentrifugation (117,734 g)	LC-ESI-MS/MS	407
761	360	291392960101	Both	29139296	J Proteome Res. 2017 Nov 15. doi: 10.1021/acs.jproteome.7b00646.	Differential content of proteins, mRNAs, and miRNAs suggests that MDSC and their exosomes may mediate distinct immune suppressive functions.	Eukaryote	Mus musculus	Ex vivo	Myeloid-derived suppressor cell	4T1-injected (conventional)	Preclearing (805 g, 2,090 g) > Ultracentrifugation (100,000 g) > Sucrose density gradient ultracentrifugation (100,000 g)	LC-ESI-MS/MS	1028
762	360	291392960102	Both	29139296	J Proteome Res. 2017 Nov 15. doi: 10.1021/acs.jproteome.7b00646.	Differential content of proteins, mRNAs, and miRNAs suggests that MDSC and their exosomes may mediate distinct immune suppressive functions.	Eukaryote	Mus musculus	Ex vivo	Myeloid-derived suppressor cell	4T1/IL-1??-injected (inflammatory)	Preclearing (805 g, 2,090 g) > Ultracentrifugation (100,000 g) > Sucrose density gradient ultracentrifugation (100,000 g)	LC-ESI-MS/MS	1228
763	361	291456220101	sEV	29145622	J Exp Bot. 2017 Nov 14. doi: 10.1093/jxb/erx355.	Plant extracellular vesicles are incorporated by a fungal pathogen and inhibit its growth.	Eukaryote	Helianthus annuus	In vivo	17-day-old seedling	Normal	Immersion in extracellular fluid extraction buffer > Vacuum infiltration > Preclearing (500 g, 10,000 g) > Ultracentrifugation (100,000 g)	LC-ESI-MS/MS	228
764	362	291919620101	#N/A	29191962	FASEB J. 2017 Nov 30. pii: fj.201700248RR. doi: 10.1096/fj.201700248RR.	Nontypeable Haemophilus influenzae lysates increase heterogeneous nuclear ribonucleoprotein secretion and exosome release in human middle-ear epithelial cells.	Eukaryote	Homo sapiens	In vitro	Middle-ear epithelial cell (HMEEC-1)	Control_24 h	Preclearing (10,000 g) > Filtration (0.22 ??m) > Concentration (3 kDa) > ExoQuick-TC	1DE-LC-ESI-MS/MS	868
765	362	291919620102	#N/A	29191962	FASEB J. 2017 Nov 30. pii: fj.201700248RR. doi: 10.1096/fj.201700248RR.	Nontypeable Haemophilus influenzae lysates increase heterogeneous nuclear ribonucleoprotein secretion and exosome release in human middle-ear epithelial cells.	Eukaryote	Homo sapiens	In vitro	Middle-ear epithelial cell (HMEEC-1)	Control_48 h	Preclearing (10,000 g) > Filtration (0.22 ??m) > Concentration (3 kDa) > ExoQuick-TC	1DE-LC-ESI-MS/MS	864
766	362	291919620103	#N/A	29191962	FASEB J. 2017 Nov 30. pii: fj.201700248RR. doi: 10.1096/fj.201700248RR.	Nontypeable Haemophilus influenzae lysates increase heterogeneous nuclear ribonucleoprotein secretion and exosome release in human middle-ear epithelial cells.	Eukaryote	Homo sapiens	In vitro	Middle-ear epithelial cell (HMEEC-1)	Nontypeable Haemophilus influenzae lysate-treated_24 h	Preclearing (10,000 g) > Filtration (0.22 ??m) > Concentration (3 kDa) > ExoQuick-TC	1DE-LC-ESI-MS/MS	869
767	362	291919620104	#N/A	29191962	FASEB J. 2017 Nov 30. pii: fj.201700248RR. doi: 10.1096/fj.201700248RR.	Nontypeable Haemophilus influenzae lysates increase heterogeneous nuclear ribonucleoprotein secretion and exosome release in human middle-ear epithelial cells.	Eukaryote	Homo sapiens	In vitro	Middle-ear epithelial cell (HMEEC-1)	Nontypeable Haemophilus influenzae lysate-treated_48 h	Preclearing (10,000 g) > Filtration (0.22 ??m) > Concentration (3 kDa) > ExoQuick-TC	1DE-LC-ESI-MS/MS	887
768	363	291943790101	#N/A	29194379	Proteomes. 2017 Dec 1;5(4). pii: proteomes5040034. doi: 10.3390/proteomes5040034.	Isolation and Characterization of Serum Extracellular Vesicles (EVs) from Atlantic Salmon Infected with Piscirickettsia Salmonis.	Eukaryote	Salmo salar	In vivo	Serum	Normal	Preclearing (10,000 g) > exoEasy Maxi	LC-ESI-MS/MS	187
769	363	291943790102	#N/A	29194379	Proteomes. 2017 Dec 1;5(4). pii: proteomes5040034. doi: 10.3390/proteomes5040034.	Isolation and Characterization of Serum Extracellular Vesicles (EVs) from Atlantic Salmon Infected with Piscirickettsia Salmonis.	Eukaryote	Salmo salar	In vivo	Serum	Infected with Piscirickettsia salmonis	Preclearing (10,000 g) > exoEasy Maxi	LC-ESI-MS/MS	215
770	364	291962670101	#N/A	29196267	Biochem Biophys Res Commun. 2017 Nov 28. pii: S0006-291X(17)32353-7. doi: 10.1016/j.bbrc.2017.11.176.	Intrauterine exosomes are required for bovine conceptus implantation.	Eukaryote	Bos taurus	In vivo	Uterine flushing fluid	Day 17 pregnancy	ExoQuick-TC	LC-ESI-MS/MS	596
771	364	291962670102	#N/A	29196267	Biochem Biophys Res Commun. 2017 Nov 28. pii: S0006-291X(17)32353-7. doi: 10.1016/j.bbrc.2017.11.176.	Intrauterine exosomes are required for bovine conceptus implantation.	Eukaryote	Bos taurus	In vivo	Uterine flushing fluid	Day 20 pregnancy	ExoQuick-TC	LC-ESI-MS/MS	596
772	364	291962670103	#N/A	29196267	Biochem Biophys Res Commun. 2017 Nov 28. pii: S0006-291X(17)32353-7. doi: 10.1016/j.bbrc.2017.11.176.	Intrauterine exosomes are required for bovine conceptus implantation.	Eukaryote	Bos taurus	In vivo	Uterine flushing fluid	Day 22 pregnancy	ExoQuick-TC	LC-ESI-MS/MS	596
773	365	292034970101	MV	29203497	Mol Cell Proteomics. 2017 Dec 4. pii: RA117.000045. doi: 10.1074/mcp.RA117.000045.	Outer Membrane Vesicles (OMV)-based and proteomics-driven antigen selection identifies novel factors contributing to Bordetella pertussis adhesion to epithelial cells.	Prokaryote	Bordetella pertussis	In vitro	Bordetella pertussis BP537	Normal	Preclearing (5,000 g) > Filtration (0.22 ??m) > Ultracentrifugation (175,000 g)	LC-MALDI-MS/MS	384
774	365	292034970102	MV	29203497	Mol Cell Proteomics. 2017 Dec 4. pii: RA117.000045. doi: 10.1074/mcp.RA117.000045.	Outer Membrane Vesicles (OMV)-based and proteomics-driven antigen selection identifies novel factors contributing to Bordetella pertussis adhesion to epithelial cells.	Prokaryote	Bordetella pertussis	In vitro	Bordetella pertussis BP536	Normal	Preclearing (5,000 g) > Filtration (0.22 ??m) > Ultracentrifugation (175,000 g)	LC-MALDI-MS/MS	389
775	366	292057660101	MV	29205766	Cell Microbiol. 2017 Dec 4. doi: 10.1111/cmi.12814.	The bile salt sodium taurocholate induces Campylobacter jejuni outer membrane vesicle production and increases OMV-associated proteolytic activity.	Prokaryote	Campylobacter jejuni	In vitro	Campylobacter jejuni 11168H	0.25 sodium taurocholate	Preclearing (4,000 g) > Filtration (0.22 ??m) > Concentration (10 kDa) > Ultracentrifugation (150,000 g)	1DE-LC-ESI-MS/MS	185
776	367	292129350101	sEV	29212935	J Virol. 2017 Dec 6. pii: JVI.01969-17. doi: 10.1128/JVI.01969-17.	Tetraspanin CD63 bridges autophagic and endosomal processes to regulate exosomal secretion and intracellular signaling of Epstein-Barr virus LMP1.	Eukaryote	Homo sapiens	In vitro	Embryonic kidney cell (HEK293)	Normal	Preclearing (500 g, 2,000 g, 10,000 g) > PEG precipitation > Centrifugation (10,000 g) > Ultracentrifugation (100,000 g) > Iodixanol density gradient ultracentrifugation (100,000 g) > Ultracentrifugation (100,000 g)	1DE-LC-ESI-MS/MS	1008
777	367	292129350102	sEV	29212935	J Virol. 2017 Dec 6. pii: JVI.01969-17. doi: 10.1128/JVI.01969-17.	Tetraspanin CD63 bridges autophagic and endosomal processes to regulate exosomal secretion and intracellular signaling of Epstein-Barr virus LMP1.	Eukaryote	Homo sapiens	In vitro	Embryonic kidney cell (HEK293)	CD63-CRISPR	Preclearing (500 g, 2,000 g, 10,000 g) > PEG precipitation > Centrifugation (10,000 g) > Ultracentrifugation (100,000 g) > Iodixanol density gradient ultracentrifugation (100,000 g) > Ultracentrifugation (100,000 g)	1DE-LC-ESI-MS/MS	869
778	368	292402720101	MV	29240272	Mol Microbiol. 2017 Dec 14. doi: 10.1111/mmi.13897.	Amino Acid Deprivation and Central Carbon Metabolism Regulate the Production of Outer Membrane Vesicles and Tubes by Francisella.	Prokaryote	Francisella tularensis	In vitro	Francisella tularensis SchuS4	Normal	Preclearing (3,940 g) > Filtration (0.2 ??m) > Ultracentrifugation (100,000 g) > Iodixanol density gradient ultracentrifugation (100,000 g)	LC-ESI-MS/MS	411
779	369	292943690101	MV	29294369	Microb Pathog. 2017 Dec 30. pii: S0882-4010(17)31431-6. doi: 10.1016/j.micpath.2017.12.071.	Salt stress affects global protein expression profiles of extracellular membrane-derived vesicles of Listeria monocytogenes.	Prokaryote	Listeria monocytogenes	In vitro	Listeria monocytogenes 10403S	Wild-type_normal	Preclearing (6,000 g) > Filtration (0.22 ??m) > Concentration (500 kDa) > Ultracentrifugation (150,000 g)	1DE-LC-ESI-MS/MS	140
780	369	292943690102	MV	29294369	Microb Pathog. 2017 Dec 30. pii: S0882-4010(17)31431-6. doi: 10.1016/j.micpath.2017.12.071.	Salt stress affects global protein expression profiles of extracellular membrane-derived vesicles of Listeria monocytogenes.	Prokaryote	Listeria monocytogenes	In vitro	Listeria monocytogenes 10403S	??sigB_normal	Preclearing (6,000 g) > Filtration (0.22 ??m) > Concentration (500 kDa) > Ultracentrifugation (150,000 g)	1DE-LC-ESI-MS/MS	106
781	369	292943690103	MV	29294369	Microb Pathog. 2017 Dec 30. pii: S0882-4010(17)31431-6. doi: 10.1016/j.micpath.2017.12.071.	Salt stress affects global protein expression profiles of extracellular membrane-derived vesicles of Listeria monocytogenes.	Prokaryote	Listeria monocytogenes	In vitro	Listeria monocytogenes 10403S	Wild-type_salt stress	Preclearing (6,000 g) > Filtration (0.22 ??m) > Concentration (500 kDa) > Ultracentrifugation (150,000 g)	1DE-LC-ESI-MS/MS	141
782	369	292943690104	MV	29294369	Microb Pathog. 2017 Dec 30. pii: S0882-4010(17)31431-6. doi: 10.1016/j.micpath.2017.12.071.	Salt stress affects global protein expression profiles of extracellular membrane-derived vesicles of Listeria monocytogenes.	Prokaryote	Listeria monocytogenes	In vitro	Listeria monocytogenes 10403S	??sigB_salt stress	Preclearing (6,000 g) > Filtration (0.22 ??m) > Concentration (500 kDa) > Ultracentrifugation (150,000 g)	1DE-LC-ESI-MS/MS	103
783	370	293217410101	lEV	29321741	Front Pharmacol. 2017 Dec 13;8:910. doi: 10.3389/fphar.2017.00910. eCollection 2017.	ATP Modifies the Proteome of Extracellular Vesicles Released by Microglia and Influences Their Action on Astrocytes.	Eukaryote	Rattus norvegicus	Ex vivo	Microglial cell	Constitutive_ectosome	Preclearing (300 g) > Centrifugation (10,000 g)	1DE-LC-ESI-MS/MS	140
784	371	293217410102	Both	29321741	Front Pharmacol. 2017 Dec 13;8:910. doi: 10.3389/fphar.2017.00910. eCollection 2017.	ATP Modifies the Proteome of Extracellular Vesicles Released by Microglia and Influences Their Action on Astrocytes.	Eukaryote	Rattus norvegicus	Ex vivo	Microglial cell	Constitutive_exosome	Preclearing (300 g) > Centrifugation (10,000 g) > Ultracentrifugation (100,000 g)	1DE-LC-ESI-MS/MS	142
785	370	293217410103	lEV	29321741	Front Pharmacol. 2017 Dec 13;8:910. doi: 10.3389/fphar.2017.00910. eCollection 2017.	ATP Modifies the Proteome of Extracellular Vesicles Released by Microglia and Influences Their Action on Astrocytes.	Eukaryote	Rattus norvegicus	Ex vivo	Microglial cell	ATP-stimulated_ectosome	Preclearing (300 g) > Centrifugation (10,000 g)	1DE-LC-ESI-MS/MS	177
786	371	293217410104	Both	29321741	Front Pharmacol. 2017 Dec 13;8:910. doi: 10.3389/fphar.2017.00910. eCollection 2017.	ATP Modifies the Proteome of Extracellular Vesicles Released by Microglia and Influences Their Action on Astrocytes.	Eukaryote	Rattus norvegicus	Ex vivo	Microglial cell	ATP-stimulated_exosome	Preclearing (300 g) > Centrifugation (10,000 g) > Ultracentrifugation (100,000 g)	1DE-LC-ESI-MS/MS	97
787	334	293412920101	#N/A	29341292	Biofactors. 2018 Jan 16. doi: 10.1002/biof.1407.	Amniotic fluid stem cell exosomes: Therapeutic perspective.	Eukaryote	Homo sapiens	In vivo	Amniotic fluid	Normal	Total Exosome Isolation Reagent	1DE-LC-MALDI-MS/MS	259
788	334	293412920102	#N/A	29341292	Biofactors. 2018 Jan 16. doi: 10.1002/biof.1407.	Amniotic fluid stem cell exosomes: Therapeutic perspective.	Eukaryote	Homo sapiens	Ex vivo	Amniotic fluid stem cell	Normal	Total Exosome Isolation Reagent	1DE-LC-MALDI-MS/MS	214
789	372	293499260101	Both	29349926	Cell Microbiol. 2018 Jan 18. doi: 10.1111/cmi.12822.	Extracellular vesicles from early-stage P. falciparum-infected red blood cells contain PfEMP1 and induce transcriptional changes in human monocytes.	Eukaryote	Homo sapiens, Plasmodium falciparum	Ex vivo	Erythrocyte	Early-stage parasite (3D7 wild-type)-infected	Preclearing (300 g, 3,000 g) > Filtration (0.2 ??m) > Ultracentrifugation (120,000 g) > Iodixanol density gradient ultracentrifugation (100,000 g) > Ultracentrifugation (120,000 g)	LC-ESI-MS/MS	268
790	372	293499260102	Both	29349926	Cell Microbiol. 2018 Jan 18. doi: 10.1111/cmi.12822.	Extracellular vesicles from early-stage P. falciparum-infected red blood cells contain PfEMP1 and induce transcriptional changes in human monocytes.	Eukaryote	Homo sapiens, Plasmodium falciparum	Ex vivo	Erythrocyte	Early-stage parasite (3D7 PfEMP1-knockdown)-infected	Preclearing (300 g, 3,000 g) > Filtration (0.2 ??m) > Ultracentrifugation (120,000 g) > Iodixanol density gradient ultracentrifugation (100,000 g) > Ultracentrifugation (120,000 g)	LC-ESI-MS/MS	277
791	253	293601390101	sEV	29360139	Hepatology. 2018 Jan 23. doi: 10.1002/hep.29803.	Hepatic stellate cell-derived PDGFRalpha-enriched extracellular vesicles promote liver fibrosis in mice through SHP2.	Eukaryote	Homo sapiens	Ex vivo	Hepatic stellate cell	Normal	Preclearing (300 g, 20,000 g) > Ultracentrifugation (100,000 g)	1DE-LC-ESI-MS/MS	2177
792	253	293601390102	sEV	29360139	Hepatology. 2018 Jan 23. doi: 10.1002/hep.29803.	Hepatic stellate cell-derived PDGFRalpha-enriched extracellular vesicles promote liver fibrosis in mice through SHP2.	Eukaryote	Homo sapiens	Ex vivo	Hepatic stellate cell	PDGF-BB-treated	Preclearing (300 g, 20,000 g) > Ultracentrifugation (100,000 g)	1DE-LC-ESI-MS/MS	2277
793	253	293601390103	sEV	29360139	Hepatology. 2018 Jan 23. doi: 10.1002/hep.29803.	Hepatic stellate cell-derived PDGFRalpha-enriched extracellular vesicles promote liver fibrosis in mice through SHP2.	Eukaryote	Homo sapiens	Ex vivo	Hepatic stellate cell	TGF-??-treated	Preclearing (300 g, 20,000 g) > Ultracentrifugation (100,000 g)	1DE-LC-ESI-MS/MS	2076
794	373	293716890101	Both	29371689	Sci Rep. 2018 Jan 25;8(1):1579. doi: 10.1038/s41598-018-19855-4.	Biologically active constituents of the secretome of human W8B2(+) cardiac stem cells.	Eukaryote	Homo sapiens	Ex vivo	W8B2+ cardiac stem cell	Normal	Preclearing > Filtration (0.2 ??m) > Centrifugation (10,000 g) > Ultracentrifugation (100,000 g)	LC-ESI-MS/MS	602
795	374	293966220101	sEV	29396622	Clin Exp Nephrol. 2018 Feb 2. pii: 10.1007/s10157-018-1538-6. doi: 10.1007/s10157-018-1538-6.	AQP2 in human urine is predominantly localized to exosomes with preserved water channel activities.	Eukaryote	Homo sapiens	In vivo	Urine	Normal	Preclearing (3,000 g, 17,000 g) > Ultracentrifugation (160,000 g)	LC-ESI-MS/MS	137
796	375	294107790101	Both	29410779	J Extracell Vesicles. 2018 Jan 23;7(1):1422675. doi: 10.1080/20013078.2017.1422675. eCollection 2018.	Exosomes as secondary inductive signals involved in kidney organogenesis.	Eukaryote	Mus musculus	In vitro	Ureteric bud cell (UBtip)	Normal	Preclearing (200 g) > Filtration (0.45 ??m) > Concentration (10 kDa) > Filtration (0.2 ??m) > Iodixanol density gradient ultracentrifugation (100,000 g) > Ultracentrifugation (100,000 g)	LC-ESI-MS/MS	193
797	376	294107800101	sEV	29410780	J Extracell Vesicles. 2018 Jan 21;7(1):1428004. doi: 10.1080/20013078.2018.1428004. eCollection 2018.	Characterization of Trichuris muris secreted proteins and extracellular vesicles provides new insights into host-parasite communication.	Eukaryote	Trichuris muris, Mus musculus	Ex vivo	Trichuris muris from the cecum of infected mice	Normal	Preclearing (500 g, 2,000 g, 4,000 g) > Concentration (10 kDa) > Preclearing (12,000 g) > Ultracentrifugation (120,000 g) > Iodixanol density gradient ultracentrifugation (120,000 g) > Concentration (10 kDa)	1DE-LC-ESI-MS/MS	365

## Sheet: SupTable1B
Supplementary Table 1B. Definition of differential ultracentrifugation criteria used for classifying datasets
Index	Purification Condition	Isolated Fraction
1	Prokaryote	Membrane vesicles (MV)
2	Eukaryote, preclearing >10 000 g, centrifugation >=100 000	Small extracellular vesicles (sEV)
3	Eukaryote, preclearing<=10 000, centrifugation <=21 000	Large extracellular vesicles (lEV)
4	Eukaryote, preclearing<=10 000, centrifugation>100 000	Both
5	Eukaryote, preclearing<=10 000, centrifugation<100 000	#N/A
6	Eukaryote, no ultracentrifugation	#N/A

## Sheet: SupTable1C
Supplementary Table 1C. Classified EV proteomic dataset in EVpedia
MethodIndex	Dataset Type	MaxPreclearing (x1000g)	MaxUltracentrifugation (x1000g)	MinFiltration (uM)	MaxMWCO (kDa)	Other	PurificationDescription
1	Both	1	105				Preclearing (1000 g) > Ultracentrifugation (105,000 g)
2	sEV	10	100				Preclearing (3000 g, 4500 g, 10,000 g) > Ultracentrifugation (100,000 g) > Sucrose cushion ultracentrifugation (100,000 g)
3	sEV	17	200				Preclearing (17,000 g) > Ultracentrifugation (200,000 g)
4	Both	#N/A	100	0.22			Filtration (0.22 ???m) > Ultracentrifugation (100,000 g)
5	Mv						Filtration (0.22 ???m) > Concentration (100 kDa)
6	Both	0.71	150				Preclearing (710 g) > Ultracentrifugation (150,000 g)
7	lEV	1.5	15				Preclearing (750 g, 1500 g) > Ultracentrifugation (15,000 g)
8	Mv						Filtration (0.22 ???m) > Ultracentrifugation (200,000 g)
9	sEV	20	100				Preclearing (2000 g, 20,000 g) > Ultracentrifugation (100,000 g)
10	sEV	15	200				Preclearing (1000 g, 15,000 g) > Ultracentrifugation (100,000 g) > Sucrose density gradient ultracentrifugation (200,000 g)
11	sEV	16.5	120	0.22			Preclearing (500 g, 16,500 g) > Filtration (0.22 ???m) > Ultracentrifugation (120,000 g)
12	sEV	10	100	0.2			Preclearing (300 g, 3000 g) > Filtration (1.2, 0.8, 0.4, 0.2 ???m) > Preclearing (10,000 g) > Ultracentrifugation (100,000 g) > Sucrose density gradient ultracentrifugation (79,000 g)
13	Mv						Preclearing (6000 g) > Filtration (0.45 ???m) > Concentration (100 kDa) > Preclearing (6000 g) > Filtration (0.45 ???m) > Preclearing (20,000 g, 40,000 g) > Ultracentrifugation (150,000 g) > Sucrose density gradient ultracentrifugation (200,000 g)
14	Both	0.8	150		100		Preclearing (500 g, 800 g) > Concentration (100 kDa) > Sucrose cushion ultracentrifugation (100,000 g) > Sucrose density gradient ultracentrifugation (150,000 g)
15	sEV	15	100		100		Preclearing (4000 g, 15,000 g) > Concentration (100 kDa) > Preclearing (4000 g, 15,000 g) > Filtration (0.8 ???m) > Ultracentrifugation (100,000 g)
16	#N/A	10	80				Filtration (Nylon membrane) > Preclearing (10,000 g) > Ultracentrifugation (80,000 g)
17	#N/A	1.55	40				Preclearing (1550 g) > Ultracentrifugation (40,000 g)
18	sEV	40	100				Preclearing (1550 g, 40,000 g) > Ultracentrifugation (100,000 g)
19	sEV	17	200				Preclearing (250 g, 17,000 g) > Ultracentrifugation (200,000 g)
20	Both	3	120				Preclearing (3000 g) > Ultracentrifugation (120,000 g)
21	Both	0.2	100				Preclearing (200 g) > Ultracentrifugation (100,000 g)
22	#N/A	1	#N/A		100	Flow field-flow fractionation	Preclearing (1000 g) > Concentration (100 kDa) > Flow field-flow fractionation
23	sEV	10	100				Preclearing (1000 g, 10,000 g) > Ultracentrifugation (100,000 g) > Sucrose density gradient ultracentrifugation (78,000 g) > Ultracentrifugation (100,000 g)
24	Both	#N/A	100	0.22		Gel exclusion chromatography	Filtration (0.22 ???m) > Gel exclusion chromatography > Sucrose density gradient ultracentrifugation (175,000 g) > Ultracentrifugation (100,000 g) > Sucrose cushion ultracentrifugation (175,000 g)
25	sEV	15	200	8			Preclearing (15,000 g) > Filtration (8 ???m) > Ultracentrifugation (150,000 g) > Sucrose/D2O density ultracentrifugation (200,000 g)
26	sEV	10	200				Preclearing (300 g, 10,000 g) > Ultracentrifugation (200,000 g)
27	sEV	20	100				Preclearing (20,000 g) > Ultracentrifugation (100,000 g)
28	Both	0.1	200				Preclearing (100 g) > Ultracentrifugation (22,300 g) > Sucrose density gradient ultracentrifugation (200,000 g)
29	sEV	10	100	0.22			Preclearing (500 g) > Filtration (0.22 ???m) > Preclearing (10,000 g) > Ultracentrifugation (100,000 g)
30	lEV	12.5	20.5				Preclearing (400 g, 12,500 g) > Ultracentrifugation (20,500 g)
31	lEV	1	15				Preclearing (750 g, 1000 g) > Ultracentrifugation (15,000 g)
32	Both	6	100		100		Preclearing (6000 g) > Concentration (100 kDa) > Sucrose/D2O cushion ultracentrifugation (100,000 g)
33	Mv						Preclearing (6000 g) > Filtration (0.2 ???m) > Concentration (100 kDa) > Ultracentrifugation (150,000 g) > Sucrose density gradient ultracentrifugation (200,000 g) > Ultracentrifugation (150,000 g)
34	lEV	1.5	16				Preclearing (750 g, 1500 g) > Ultracentrifugation (16,000 g)
35	#N/A	#N/A	0.1				Pelleting (100 g)
36	Both	5	130			Gel filtration	Preclearing (5000 g) > Ultracentrifugation (130,000 g) > Gel filtration
37	Mv						Preclearing (10000 g) > Filtration (0.45 ???m) > Concentration (100 kDa) > Filtation (0.22 ???m) > Ultracentrifugation (150,000 g) > Iodixanol density gradient ultracentrifugation (200,000 g)
38	Both	1.9	100	0.1	5		Preclearing (400 g, 1900 g) > Filtration (0.1 ???m) > Concentration (5 kDa) > Ultracentrifugation (100,000 g)
39	#N/A	1.9	#N/A		5	Affinity purification (A33)	Preclearing (400 g, 1900 g) > Concentration (5 kDa) > Affinity purification (A33)
40	Both	2	100	0.22			Preclearing (500 g, 2000 g) > Filtration (0.22 ???m) > Ultracentrifugation (100,000 g)
41	sEV	15	200				Preclearing (1500 g, 15,000 g) > Ultracentrifugation (200,000 g)
42	sEV	15	110				Preclearing (300 g, 700 g, 15,000 g) > Ultracentrifugation (110,000 g)
43	sEV	10	118				Preclearing (400 g, 2000 g, 10,000 g) > Sucrose cushion ultracentrifugation (100,000 g) > Ultracentrifugation (118,000 g)
44	sEV	10	190			Affinity purification (MHC II)	Preclearing (200 g, 500 g, 10,000 g) > Ultracentrifugation (70,000 g) > Sucrose density ultracentrifugation (190,000 g) > Affinity purification (MHC II)
45	sEV	10	100				Preclearing (300 g, 2000 g, 10,000 g) > Ultracentrifugation (100,000 g)
46	sEV	10	100				Preclearing (1500 g, 10,000 g) > Ultracentrifugation (100,000 g) > Sucrose/D2O cushion ultracentrifugation (100,000 g) > Ultracentrifugation (100,000 g)
47	Mv						Filtration (0.2 ???m) > Ultracentrifugation (150,000 g)
48	sEV	15	110				Preclearing (300 g, 700 g, 15,000 g) > Filtration (0.2 ??m) > Concentration (100 kDa) > Ultracentrifugation (110,000 g)
49	Both	1.25	100				Preclearing (250 g, 1250 g) > Ultracentrifugation (100,000 g)
50	sEV	10	100				Preclearing (60 g, 10,000 g) > Ultracentrifugation (100,000 g) > Sucrose density gradient ultracentrifugation (100,000 g) > Ultracentrifugation (100,000 g)
51	Mv						Preclearing (15,000 g) > Filtration (0.45 ???m) > Ammonium sulfate precipitation > Ultracentrifugation (100,000 g)
52	Both	2.5	200	0.1	10		Preclearing (2500 g) > Filtration (0.1 ??m) > Concentration (10 kDa) > Ultracentrifugation (200,000 g)
53	Mv						Preclearing (6000 g) > Filtration (0.45 ???m, 0.22 ???m) > Ultracentrifugation (125,000 g)
54	sEV	15	222.228				Preclearing (400 g, 15,000 g) > Concentration (500 kDa) > Ultracentrifugation (100,000 g) > Sucrose density gradient ultracentrifugation (222,228 g) > Ultracentrifugation (105,000 g)
55	sEV	10	100				Preclearing (10,000 g) > Ultracentrifugation (100,000 g)
56	Mv						Preclearing (6000 g) > Filtration (0.2 ???m) > Concentration (100 kDa) > Ultracentrifugation (150,000 g)
57	Mv						Preclearing (5000 g) > Filtration (0.45 ???m) > Concetration (100 kDa) > Filtration (0.2 ???m) > Ultracentrifugation (150,000 g) > Sucrose density gradient ultracentrifugation (200,000 g) > Ultracentrifugation (150,000 g)
58	#N/A	20	80				Preclearing (600 g, 20,000 g) > Ultracentrifugation (80,000 g)
59	sEV	17	270				Preclearing (17,000 g) > Ultracentrifugation (200,000 g) > Sucrose density gradient ultracentrifugation (270,000 g) > Ultracentrifugation (200,000 g)
60	Both	3.2	200				Preclearing (3200 g) > Sucrose cushion ultracentrifugation (100,000 g) > Iodixanol density gradient ultracentrifugation (200,000 g) > Sucrose cushion ultracentrifugation (100,000 g) > Iodixanol density gradient ultracentrifugation (200,000 g)
61	lEV	2	12.2	0.8			Preclearing (2000 g) > Filtration (0.8 ???m) > Ultracentrifugation (12,200 g)
62	Mv						Preclearing (6000 g) > Filtation (0.45 ???m) > Concentration (100 kDa) > Filtation (0.22 ???m) > Ultracentrifugation (150,000 g) > Iodixanol density gradient ultracentrifugation (200,000 g) > Ultracentrifugation (150,000 g)
63	sEV	10	100				Preclearing (5000 g, 10,000 g) > Sucrose cushion ultracentrifugation (100,000 g) > Sucrose density gradient ultracentrifugation (100,000 g) > Ultracentrifugation (100,000 g)
64	Both	5	200	0.45			Preclearing (1500 g, 5000 g) > Filtration (0.45 ???m) > Ultracentrifugation (200,000 g)
65	sEV	10	100				Preclearing (600 g, 10,000 g) > Ultracentrifugation (100,000 g)
66	sEV	15	100	0.22			Preclearing (500 g, 15,000 g) > Ultracentrifugation (100,000 g) > Filtration (0.22 ??m) > Ultracentrifugation (100,000 g)
67	sEV	10	200				Preclearing (10,000 g) > Ultracentrifugation (100,000 g) > Sucrose cushion ultracentrifugation (200,000 g)> Sucrose density gradient ultracentrifugation (112,700 g) > Ultracentrifugation (200,000 g)
68	Both	0.8	150		100		Preclearing (500 g, 800 g) > Concentration (100 kDa) > Sucrose cushion ultracentrifugation (100,000 g) > Iodixanol density gradient ultracentrifugation (150,000 g)
69	Both	2	100	0.1	5		Preclearing (480 g, 2000 g) > Filtration (0.1 ???m) > Concentration (5 kDa) > Ultracentrifugation (100,000 g)
70	Both	2	100	0.1	5		Preclearing (480 g, 2000 g) > Filtration (0.1 ???m) > Concentration (5 kDa) > Iodixanol density gradient ultracentrifugation (40%, 20%, 10%, 5%, 100,000 g) > Ultracentrifugation (100,000 g)
71	Both	2	100	0.1	5	Affinity purification (EpCAM)	Preclearing (480 g, 2000 g) > Filtration (0.1 ???m) > Concentration (5 kDa) > Immuno-affinity purification (EpCAM)
72	sEV	15	100		100		Preclearing (4000 g, 15,000 g) > Concentration (100 kDa) > Preclearing (15,000 g) > Ultracentrifugation (100,000 g)
73	lEV	#N/A	18.89				Pelleting (18,890 g)
74	lEV	3.2	20				Preclearing (1500 g, 3200 g) > Ultracentrifugation (20,000 g)
75	sEV	20	100				Preclearing (1500 g, 3200 g, 20,000 g) > Ultracentrifugation (100,000 g)
76	Mv						Preclearing (6000 g) > Filtration (0.2 ??m) > Concentration (500 kDa) > Ultracentrifugation (150,000 g)
77	sEV	15	200				Preclearing (400 g, 800 g, 15,000 g) > Ultracentrifugation (200,000 g) > Sucrose cushion ultracentrifugation (110,000 g) > Ultracentrifugation (110,000 g)
78	sEV	10	100				Preclearing (300 g, 2000 g, 10,000 g) > Ultracentrifugation (100,000 g) > Sucrose cushion ultracentrifugation (100,000 g) > Ultracentrifugation (100,000 g)
79	lEV	2.6	20	5			Preclearing (2600 g) > Filtration (5 ???m) > Ultracentrifugation (20,000 g)
80	Mv						Preclearing (12,000 g) > Filtration (0.2 ???m) > Ultracentrifugation (100,000 g)
81	sEV	10	100				Preclearing (400 g, 10,000 g) > Ultracentrifugation (100,000 g)
82	sEV	12	110	0.22			Preclearing (2000 g, 12,000 g) > Ultracentrifugation (110,000 g) > Filtration (0.22 ??m) > Ultracentrifugation (100,000 g)
83	sEV	20	100				Preclearing (500 g, 20,000 g) > Ultracentrifugation (100,000 g)
84	#N/A	1.55	40				Preclearing (1550 g) > Ultracentrifugation (40,000 g)
85	Both	0.5	100	0.22		Affinity purification (HLA-DR)	Preclearing (500 g, 30 min) > Filtration (0.45 um, 0.22 um) > Sucrose cushion (100,000 g, 1 hr) > Affinity purification (anti-HLA-DR)
86	Both	0.5	100	0.22		Affinity purification (CHMP4a, Tsg101, Myo II, Rab 11, and Vinc/Tal)	Preclearing (500 g, 30 min) > Filtration (0.45 um, 0.22 um) > Sucrose cushion (100,000 g, 1 hr) > Affinity purification (antibodies against CHMP4a, Tsg101, Myo II, Rab 11, and Vinc/Tal)
87	Both	1.9	100	0.1	5		Preclearing (1900 g) > Filtration (0.1 ???m) > Concentration (5 kDa) > Ultracentrifugation (100,000 g)
88	sEV	10	100				Preclearing (300 g, 10 min) > Preclearing (2000 g, 20 min) > Preclearing (10,000 g, 30 min) > Ultracentrifugation (100,000 g, 70 min)
89	Both	1	200				Preclearing (1000 g) > Concentration > Ultracentrifugation (18,000 g) > Ultracentrifugation (200,000 g)
90	#N/A	#N/A	100	0.22	100		Filtration (0.22 ???m) > Concentration (100 kDa) > Ultracentrifugation (100,000 g)
91	#N/A	#N/A	#N/A	0.22	100	HPLC	Concentration (100 kDa) > HPLC > Concentration (100 kDa) > Filtration (0.22 ??m)
92	Mv						Preclearing (15,000 g) > Filtration (0.2 ???m) > Ultracentrifugation (150,000 g) > Iodixanol density gradient ultracentrifugation (100,000 g)
93	Mv						Preclearing (10,000 g) > Filtration (0.22 ??m) > Concetration (10 kDa) > Ultracentrifugation (150,000 g)
94	Mv						Preclearing (2800 g) > Filtration (0.22 ???m) > Ultracentrifugation (200,000 g)
95	lEV	2	20				Preclearing (300 g, 2000 g) > Ultracentrifugation (20,000 g)
96	sEV	20	100				Preclearing (300 g, 2000 g, 20,000 g) > Ultracentrifugation (100,000 g)
97	sEV	15	120				Preclearing (300 g, 700 g, 15,000 g) > Ultracentrifugation (120,000 g)
98	sEV	10	100				Preclearing (300 g, 2500 g, 10,000 g) > Ultracentrifugation (100,000 g)
99	Mv						Preclearing (6500 g) > Filtration (0.45 ???m, 0.22 ???m) > Ultracentrifugation (150,000 g)
100	lEV	1.55	19				Preclearing (1550 g) > Ultracentrifugation (19,000 g)
101	sEV	17	100				Preclearing (17,000 g) > Ultracentrifugation (100,000 g)
102	Both	0.3	150	0.22	100		Preclearing (300 g) > Filtration (0.22 ???m) > Concentration (100 kDa) > Ultracentrifugation (150,000 g)
103	lEV	0.8	20.5				Filtration (800 nm) > Ultracentrifugation (20,500 g)
104	Both	3	100	0.45			Preclearing (3000 g) > Filtration (0.45 ???m) > Ultracentrifugation (100,000 g)
105	lEV	2	10				Preclearing (480 g, 2000 g) > Ultracentrifugation (10,000 g)
106	lEV	2	10	0.1	5	Affinity purification (A33)	Preclearing (480 g, 2000 g) > Ultracentrifugation (10,000 g) > Filtration (0.1 ???m) > Concentration (5 kDa) > Affinity purification (A33)
107	lEV	2	10	0.1	5	Affinity purification (EpCAM)	Preclearing (480 g, 2000 g) > Ultracentrifugation (10,000 g) > Filtration (0.1 ???m) > Concentration (5 kDa) > Affinity purification (EpCAM)
108	Mv						Preclearing (10,000 g) > Filtration (0.2 ??m) > Concetration (100 kDa) > Preclearing (20,000 g) > Ultracentrifugation (150,000 g)
109	sEV	10	210				Preclearing (2000 g, 10,000 g) > Ultracentrifugation (100,000 g) > Sucrose cushion ultracentrifugation (210,000 g) > Ultracentrifugation (100,000 g)
110	Mv						Preclearing (5000 g, 7500 g) > Filtration (0.22 ???m) > Adding sodium azide > Concentration (100 kDa) > Ultracentrifugation (100,000 g) > Iodixanol density gradient ultracentrifugation (100,000 g)
111	Mv						Preclearing (5000 g, 7500 g) > Filtration (0.22 ???m) > Adding sodium azide > Ultracentrifugation (100,000 g) > Ultracentrifugation (100,000 g) > OptiPrep density gradient ultracentrifugation (100,000 g)
112	sEV	16.5	120				Preclearing (500 g, 2000 g, 16,500 g) > Ultracentrifugation (120,000 g) > Sucrose cushion ultracentrifugation (120,000 g) > Ultracentrifugation (120,000 g)
113	sEV	17	200				Preclearing (1000 g, 17,000 g) > Ultracentrifugation (200,000 g)
114	#N/A	2.5	#N/A		10	Affinity purification (CR1)	Preclearing (2500 g) > Concentration (10 kDa) > Affinity purification (CR1)
115	Mv						Preclearing (2900 g) > Filtration (0.2 ???m) > Concentration (100 kDa) > Ultracentrifugation (125,000 g)
116	#N/A	1.2	50				Preclearing (1200 g) > Ultracentrifugation (50,000 g)
117	sEV	10	200	0.2			Preclearing (10,000 g) > Ultracentrifugation (150,000 g) > Sucrose cushion ultracentrifugation (200,000 g) > Sucrose cushion ultracentrifugation (112,700 g) > Ultracentrifugation (200,000 g) > Filtration (0.2 ??m)
118	sEV	17	200				Preclearing (1000 g, 17,000 g) > Ultracentrifugation (200,000 g) > Iodixanol density gradient ultracentrifugation (100,000 g) > Ultracentrifugation (100,000 g)
119	sEV	25	100				Preclearing (25,000 g) > Ultracentrifugation (100,000 g)
120	sEV	10	100				Preclearing (480 g, 2000 g, 10,000 g) > Ultracentrifugation (100,000 g) > Iodixanol density gradient ultracentrifugation (100,000 g) > Ultracentrifugation (100,000 g)
121	Both	0.8	150				Preclearing (500 g, 800 g) > Sucrose cushion ultracentrifugation (100,000 g) > Iodixanol density gradient ultracentrifugation (100,000 g)
122	Both	0.71	150				Preclearing (110 g, 710 g) > Ultracentrifugation (150,000 g)
123	sEV	10	100	0.1	5		Preclearing (480 g, 2000 g, 10,000 g) > Filtration (0.1 ???m) > Concentration (5 kDa) > Iodixanol density gradient ultracentrifugation (100,000 g) > Ultracentrifugation (100,000 g)
124	Both	4	100	0.22			Preclearing (4000 g) > Filtration (0.45 ???m) > Ultracentrifugation (100,000 g) > Filtration (0.22 ???m) > Sucrose cushion ultracentrifugation (100,000 g) > Filtration (0.22 ???m) > Ultracentrifugation (100,000 g)
125	Both	3	100				Preclearing (3000 g) > Ultracentrifugation (100,000 g)
126	sEV	10	100		100		Preclearing (600 g, 1600 g, 3600 g, 10,000 g) > Concentration (100 kDa) > Ultracentrifugation (100,000 g) > Sucrose cushion ultracentrifugation (100,000 g) > Ultracentrifugation (100,000 g)
127	sEV	10	100	0.22	100		Preclearing (480 g, 2000 g, 10,000 g) > Filtration (0.22 ???m) > Concentration (100 kDa) > Ultracentrifugation (100,000 g) > Sucrose cushion ultracentrifugation (100,000 g) > Ultracentrifugation (100,000 g)
128	sEV	10	100	0.2			Preclearing (850 g, 3000 g, 10,000 g) > Filtration (0.2 ???m) > Ultracentrifugation (100,000 g)
129	Both	0.5	200	0.22	100		Preclearing (500 g) > Filtration (0.22 ???m) > Concentration (100 kDa) > Ultracentrifugation (100,000 g) > Sucrose cushion ultracentrifugation (100,000 g) > Ultracentrifugation (200,000 g)
130	sEV	12	110	0.22			Preclearing (300 g, 2000 g, 12,000 g) > Filtration (0.22 ??m) > Ultracentrifugation (100,000 g) > Sucrose cushion ultracentrifugation (110,000 g) > Ultracentrifugation (110,000 g)
131	sEV	10	500				Preclearing (500 g, 10,000 g) > Ultracentrifugation (100,000 g) > Iodixanol density gradient ultracentrifugation (500,000 g)
132	Mv						Preclearing (15,000 g) > Filtration (0.2 ??m) > Ultracentrifugation (200,000 g)
133	lEV	0.4	20.817				Preclearing (400 g) > Ultracentrifugation (20817 g)
134	Mv						Preclearing (6000 g) > Filtration (0.2 ???m) > Concentration (500 kDa) > Ultracentrifugation (150,000 g)
135	Both	2	175				Preclearing (500 g, 2000 g) > Concentration (100 kDa) > Sucrose cushion ultracentrifugation (100,000 g) > Iodixanol density gradient ultracentrifugation (175,000 g) > Ultracentrifugation (150,000 g)
136	sEV	10	100				Preclearing (1500 g, 10,000 g) > Ultracentrifugation (100,000 g)
137	sEV	10	100	0.1			Preclearing (300 g, 10,000 g) > Filtration (0.22 ???m, 0.1 ???m) > Ultracentrifugation (100,000 g)
138	Both	2	100	0.1			Preclearing (500 g, 2000 g) > Ultracentrifugation (100,000 g) > Filtration (0.1 ???m) > Ultracentrifugation (100,000 g)
139	Both	2	100	0.1			Preclearing (500 g, 2000 g) > Ultracentrifugation (100,000 g) > Filtration (0.1 ???m) > Ultracentrifugation (100,000 g) > Iodixanol density gradient ultracentrifugation (100,000 g) > Ultracentrifugation (100,000 g)
140	#N/A	#N/A	#N/A			ExoQuick	ExoQuick
141	Both	2.09	100				Preclearing (2090 g) > Ultracentrifugation (100,000 g) > Sucrose density gradient ultracentrifugation (100,000 g)
142	Mv						Preclearing (5,000 g) > Filtration (0.22 ??m) > Ultracentrifugation (150,000 g)
143	sEV	20	100				Preclearing (1500 rpm, 20,000 g) > Ultracentrifugation (100,000 g)
144	sEV	20	100				Preclearing (400 g, 2000 g, 15,000 g, 20,000 g) > Ultracentrifugation (100,000 g)
145	Mv						Preclearing (6000 g) > Filtration (0.22 ??m) > Preclearing (30,000 g) > Ultracentrifugation (150,000 g) > Iodixanol density gradient ultracentrifugation (150,000 g)
146	sEV	10	100				Preclearing (400 g, 3000 g, 10,000 g) > Ultracentrifugation (64,000 g) > Sucrose density gradient ultracentrifugation (100,000 g)
147	sEV	10	100	0.22			Preclearing (2000 g, 10,000 g) > Filtration (0.22 ??m) > Ultracentrifugation (100,000 g)
148	sEV	10	120		3		Preclearing (300 g, 2000 g, 10,000 g) > Concentration (3 kDa) > Ultracentrifugation (120,000 g)
149	Mv						Preclearing (10,000 g) > Filtration (0.45 ??m) > Ultracentrifugation (142,032 g) > Sucrose density gradient ultracentrifugation (164,609 g) > Ultracentrifugation (250,000 g)
150	Both	1.2	100	0.2			Preclearing (300 g, 1200 g) > Filtration (0.2 ??m) > Ultracentrifugation (100,000 g) > Sucrose density ultracentrifugation (100,000 g) > Ultracentrifugation (100,000 g)
151	sEV	10	100	0.22			Preclearing (2000 g, 10,000 g) > Ultracentrifugation (100,000 g) > Filtration (0.22 ??m) > Ultracentrifugation (100,000 g)
152	Mv						Filtration (0.22 ??m) > Ultracentrifugation (210,000 g)
153	#N/A	21	#N/A	0.2		ExoQuick	Preclearing (21,000 g) > Filtration (0.2 ??m) > ExoQuick
154	Mv						Preclearing (8000 g) > Filtration (0.22 ??m) > Ultracentrifugation (213,000 g)
155	Mv						Preclearing (16,000 g) > Filtration (0.45 ??m) > Ultracentrifugation (40,000 g) > Iodixanol density gradient ultracentrifugation (110,000 g) > Ultracentrifugation (110,000 g)
156	#N/A	#N/A	#N/A			Affinity purification (cholera toxin part B)	Affinity capture with biotinylated cholera toxin part B > Capture with streptavidin-magnet beads
157	#N/A	#N/A	#N/A			Affinity purification (Annexin V)	Affinity capture with biotinylated Annexin V > Capture with streptavidin-magnet beads
158	Both	3	100		100		Preclearing (500 g, 3000 g) > Concentration (100 kDa) > Ultracentrifugation (100,000 g)
159	sEV	17	235	0.22			Preclearing (17,000 g) > Filtration (0.22 ??m) > Ultracentrifugation (235,000 g)
160	Mv						Preclearing (4500 g) > Filtration (0.22 ??m) > Ultracentrifugation (100,000 g)
161	Both	3	100		3		Preclearing (3000 rpm) > Concentration (3 kDa) > Ultracentrifugation (100,000 g)
162	lEV	10	20				Preclearing (300 g, 2000 g, 10,000 g) > Ultracentrifugation (20,000 g)
163	sEV	10	100	0.22			Preclearing (4000 g, 10,000 g) > Filtration (0.45 ??m) > Ultracentrifugation (100,000 g) > Sucrose density gradient ultracentrifugation (100,000 g) > Filtration (0.22 ??m) > Ultracentrifugation (100,000 g)
164	Both	0.5	100	0.22			Preclearing (500 g) > Filtration (0.22 ??m) > Ultracentrifugation (10,000 g, 100,000 g)
165	sEV	12	200				Preclearing (4000 g, 12,000 g) > Ultracentrifugation (30,000 g, 200,000 g)
166	sEV	20	100				Preclearing (500 g, 2000 g, 20,000 g) > Ultracentrifugation (100,000 g)
167	Mv						Preclearing (3450 g) > Filtration (0.22 ??m) > Ultracentrifugation (100,000 g) > Iodixanol density gradient ultracentrifugation (100,000 g) > Ultracentrifugation (100,000 g)
168	sEV	17	113				Preclearing (17,000 g) > Ultracentrifugation (113,000 g)
169	Mv						Preclearing (15,000 g) > Filtration (0.22 ??m) > Ultracentrifugation (150,000 g)
170	Mv						Preclearing (15,000 g) > Filtration (0.22 ??m) > Concentration (100 kDa) > Filtration (0.8 ??m) > Ultracentrifugation (195,000 g)
171	Mv						Preclearing (16,000 g) > Filtration (0.22 ??m) > Ultracentrifugation (100,000 g) > Iodixanol density gradient ultracentrifugation (100,000 g)
172	Mv						Preclearing (10,000 g) > Filtration (0.45 ??m) > Concentration (100 kDa) > Filtration (0.45 ??m) > Ultracentrifugation (150,000 g) > Iodixanol density gradient ultracentrifugation (150,000 g) > Ultracentrifugation (150,000 g)
173	sEV	10	100	0.22			Preclearing (2000 rpm, 4000 rpm) > Filtration (0.22 ??m) > Preclearing (10,000 g) > Ultracentrifugation (100,000 g)
174	lEV	3	21				Preclearing (500 g, 3000 g) > Ultracentrifugation (21,000 g)
175	Both	2	100	0.1	100		Preclearing (800 g, 2000 g) > Filtration (0.1 ??m) > Concentration (100 kDa) > Ultracentrifugation (100,000 g)
176	Mv						Preclearing (5000 g) > Concentration (100 kDa) > Ultracentrifugation (100,000 g) > Iodixanol density gradient ultracentrifugation (100,000 g)
177	sEV	15	200				Preclearing (300 g, 15,000 g) > Ultracentrifugation (100,000 g) > Sucrose cushion ultracentrifugation (200,000 g) > Ultracentrifugation (100,000 g)
178	Mv						Preclearing (10,000 g) > Filtration (0.45 ??m) > Concentration (100 kDa) > Ultracentrifugation (39,000 g) > Iodixanol density gradient ultracentrifugation (100,000 g)
179	sEV	12	120	0.22			Preclearing (300 g, 2000 g, 12,000 g) > Filtration (0.22 ??m) > Ultracentrifugation (120,000 g) > Sucrose cushion ultracentrifugation (110,000 g)
180	#N/A	#N/A	#N/A			Affinity purification (CD9-monolith)	Anti-CD9-monolith pipette tips
181	Mv						Preclearing (7000 g) > Filtration (0.2 ??m) > Concentration (100 kDa) > Ultracentrifugation (150,000 g) > Sucrose density gradient ultracentrifugation (200,000 g) > Ultracentrifugation (150,000 g)
182	Mv						Preclearing (5000 g) > Filtration (0.22 ??m) > Concentration (100 kDa) > Ultracentrifugation (180,000 g) > Iodixanol density gradient ultracentrifugation (100,000 g)
183	Mv						Preclearing (5000 g) > Filtration (0.45 ??m, 0.22 ??m) > Ultracentrifugation (140,000 g)
184	Mv						Preclearing (10,000 g) > Filtration (0.22 ??m) > Ultracentrifugation (126,000 g)
185	Mv						Preclearing (10,000 g) > Filtration (0.45 ??m) > Ultracentrifugation (40,000 g) > Filtration (0.22 ??m) > Iodixanol density gradient ultracentrifugation (100,000 g)
186	Both	2	200				Preclearing (2000 g) > Ultracentrifugation (200,000 g)
187	lEV	1.5	14				Preclearing (300 g, 1500 g) > Ultracentrifugation (14,000 g)
188	Mv						Preclearing (10,000 g) > Filtration (0.22 ??m) > Ultracentrifugation (100,000 g)
189	Both	2.5	100				Preclearing (2500 rpm) > Ultracentrifugation (100,000 g)
190	Mv						Preclearing (13,000 g) > Filtration (0.22 ??m)> Ultracentrifugation (200,000 g)
191	sEV	15	200				Preclearing (400 g, 800 g, 15,000 g) > Ultracentrifugation (200,000 g) > Sucrose cushion ultracentrifugation (110,000 g) > Ultracentrifugation (200,000 g)
192	Mv						Preclearing (6000 g) > Filtration (0.22 ??m) > Concentration (100 kDa) > Ultracentrifugation (150,000 g)
193	sEV	10	100	0.2			Preclearing (850 g, 3000 g, 10,000 g) > Filtration (0.2 ??m) > Ultracentrifugation (100,000 g)
194	Mv						Preclearing (6000 g) > Filtration (0.2 ??m) > Concentration (100 kDa) > Ultracentrifugation (150,000 g)
195	#N/A	#N/A	#N/A			PEG precipitation	Polyethylene glycol-induced precipitation
196	sEV	21	200	0.22	15		Filtration (0.22 ??m) > Concentration (15 kDa) > Preclearing (2000 g, 21,000 g) > Ultracentrifugation (200,000 g)
197	Both	#N/A	120	0.22			Filtration (0.22 ??m) > Ultracentrifugation (120,000 g)
198	Mv						Preclearing (10,000 g) > Filtration (0.45 ??m, 0.22 ??m) > Ultracentrifugation (100,000 g)
199	Mv						Preclearing (7800 rpm) > Filtration (0.2 ??m) > Concentration (100 kDa) > Ultracentrifugation (100,000 g)
200	Mv						Preclearing (10,000 g) > Filtration (0.22 ??m) > Concentration (100 kDa) > Sucrose density gradient ultracentrifugation (100,000 g) > Iodixanol density gradient ultracentrifugation (200,000 g)
201	Mv						Preclearing (12,000 g) > Filtration (1.2 ??m, 0.45 ??m, 0.22 ??m) > Ultracentrifugation (125,000 g) > Iodixanol density gradient ultracentrifugation (100,000 g) > Ultracentrifugation (125,000 g)
202	Mv						Preclearing (12,000 g) > Ultracentrifugation (150,000 g) > Filtration (0.45 ??m) > Ultracentrifugation (21,000 g)
203	Mv						Preclearing (8000 g) > Filtration (0.22 ??m) > Ultracentrifugation (85,000 g) > Iodixanol density gradient ultracentrifugation (180,000 g)
204	Mv						Preclearing (10,000 g) > Filtration (0.65 ??m, 0.4 ??m) > Concentration (100 kDa) > Iodixanol density gradient ultracentrifugation (100,000 g)
205	Mv						Preclearing (8000 g) > Filtration (0.22 ??m) > Concentration (100 kDa) > Ultracentrifugation (100,000 g) > Iodixanol density gradient ultracentrifugation (150,000 g)
206	Both	3	100				Preclearing (500 g, 3000 g) > Ultracentrifugation (100,000 g)
207	sEV	16.5	120	0.2			Preclearing (300 g, 16,500 g) > Filtration (0.2 ??m) > Ultracentrifugation (120,000 g)
208	Both	7.5	100	0.22			Preclearing (600 g, 2000 g, 7500 g) > Filtration (0.22 ??m) > Ultracentrifugation (100,000 g)
209	#N/A	15	80	0.8			Preclearing (300 g, 2000 g) > Filtration (0.8 ??m) > Preclearing (15,000 g) > Ultracentrifugation (80,000 g)
210	sEV	10	120	0.22			Preclearing (2000 g, 10,000 g) > Sucrose cushion ultracentrifugation (120,000 g) > Filtration (0.22 ??m) > Ultracentrifugation (120,000 g)
211	sEV	25	100	0.22			Preclearing (450 g, 3200 g, 25,000 g) > Filtration (0.22 ??m) > Ultracentrifugation (100,000 g) > Sucrose cushion ultracentrifugation (100,000 g)
212	Both	3.2	100				Preclearing (450 g, 3200 g) > Ultracentrifugation (25,000 g) > Sucrose cushion ultracentrifugation (100,000 g)
213	lEV	1.6	20				Preclearing (1600 g) > Ultracentrifugation (20,000 g)
214	#N/A	#N/A	#N/A			Capillary-based acoustic trapping	Capillary-based acoustic trapping
215	sEV	10	100				Preclearing (2000 g, 10,000 g) > Ultracentrifugation (100,000 g)
216	sEV	20	110		100		Preclearing (3000 g, 20,000 g) > Concentration (100 kDa) > Ultracentrifugation (110,000 g)
217	Both	2	100				Preclearing (500 g, 2000 g) > Ultracentrifugation (100,000 g) > Iodixanol density gradient ultracentrifugation (100,000 g)
218	Both	2	100				Preclearing (500 g, 2000 g) > Centrifugation (10,000 g) > Iodixanol density gradient ultracentrifugation (100,000 g)
219	sEV	10	100		3		Preclearing (3000 g, 10,000 g) > Ultracentrifugation (100,000 g) > Sucrose cushion ultracentrifugation (100,000 g)
220	Both	2	100		3		Preclearing (480 g, 2000 g) > Concentration (3 kDa) > Centrifugation (10,000 g) > Ultracentrifugation (100,000 g)
221	lEV	2	10		3		Preclearing (480 g, 2000 g) > Concentration (3 kDa) > Centrifugation (10,000 g)
222	lEV	2	10	0.65	3		Preclearing (480 g, 2000 g) > Concentration (3 kDa) > Filtration (0.65 ??m) > Centrifugation (10,000 g)
223	Both	2	100	0.1	3		Preclearing (480 g, 2000 g) > Concentration (3 kDa) > Filtration (0.65 ??m) > Filtration (0.45 ??m) > Filtration (0.22 ??m) > Filtration (0.1 ??m) > Ultracentrifugation (100,000 g)
224	sEV	17	160	0.2			Preclearing (800 g, 1500 g, 17,000 g) > Filtration (0.2 ??m) > Ultracentrifugation (160,000 g)
225	Both	2	210	0.2			Preclearing (800 g, 2000 g) > Filtration (0.2 ??m) > Ultracentrifugation (100,000 g) > Sucrose cushion ultracentrifugation (210,000 g) > Ultracentrifugation (150,000 g)
226	#N/A	4	#N/A	0.2		ExoQuick	Preclearing (4000 rpm) > Filtration (0.2 ??m) > ExoQuick precipitation
227	sEV	12	100				Preclearing (500 g, 12,000 g) > Ultracentrifugation (100,000 g)
228	sEV	15	110	0.2			Preclearing (2000 g, 15,000 g) > Filtration (0.2 ??m) > Ultracentrifugation (110,000 g)
229	sEV	10	100		70		Preclearing (2000 g, 10,000 g) > Concentration (70 kDa) > Ultracentrifugation (100,000 g)
230	sEV	10	100	0.22			Preclearing (1200 g, 10,000 g) > Filtration (0.45 ??m, 0.22 ??m) > Ultracentrifugation (100,000 g)
231	Both	2	110	0.23			Preclearing (400 g, 2000 g) > Filtration (0.45 ??m) > Ultracentrifugation (110,000 g) > Iodixanol density gradient ultracentrifugation (100,000 g) > Filtration (0.45 ??m)
232	sEV	10	120	0.45			Preclearing (3000 g, 10,000 g) > Filtration (0.8 ??m) > Filtration (0.45 ??m) > Centrifugation (16,500 g) > Ultracentrifugation (120,000 g) > Sucrose cushion ultracentrifugation > Ultracentrifugation
233	#N/A	3	#N/A		10	Size exclusion chromatography	Preclearing (3000 g) > Size exclusion chromatography > Concentration (10 kDa)
234	sEV	10	350				Preclearing (2000 g, 4000 g, 10,000 g) > Ultracentrifugation (100,000 g) > Iodixanol density gradient ultracentrifugation (350,000 g) > Ultracentrifugation (100,000 g)
235	Both	2	350				Preclearing (300 g, 2000 g) > Ultracentrifugation (10,000 g) > Iodixanol density gradient ultracentrifugation (350,000 g)
236	sEV	10	350				Preclearing (300 g, 2000 g, 10,000 g) > Ultracentrifugation (100,000 g) > Iodixanol density gradient ultracentrifugation (350,000 g)
237	sEV	10	100				Preclearing (300 g, 4500 g, 10,000 g) > Ultracentrifugation (100,000 g)
238	Both	3	200	0.2			Preclearing (300 g, 1500 g, 3000 g) > Filtration (0.2 ??m) > Ultracentrifugation (200,000 g)
239	sEV	12	110	0.22			Preclearing (2000 g, 12,000 g) > Filtration (0.22 ??m) > Ultracentrifugation (110,000 g)
240	#N/A	12	40	0.22			Preclearing (2000 g, 12,000 g) > Filtration (0.22 ??m) > Centrifugation (40,000 g)
241	Mv						Preclearing (4000 g) > Filtration (0.22 ??m) > Ultracentrifugation (200,000 g)
242	sEV	15	141	0.45	100		Preclearing (4000 g, 15,000 g) > Filtration (0.45 ??m) > Concentration (100 kDa) > Ultracentrifugation (141,000 g)
243	#N/A	3.27	27				Preclearing (524 g, 3270 g) > Centrifugation (27,000 g)
244	#N/A	20	20			Exo-Spin	Preclearing (2000 g, 300 g, 20,000 g) > Exo-Spin > Centrifugation (20,000 g)
245	#N/A	0.5	#N/A			Size exclusion chromatography	Preclearing (2000 g, 500 g) > Size-exclusion chromatography
246	Mv						Preclearing (10,400 g) > Ultracentrifugation (100,000 g) > Filtration (0.2 ??m)
247	sEV	15.344	100		100		Preclearing (5524 g, 15,344 g) > Concentration (100 kDa) > Centrifugation (4000 g, 15,000 g) > Ultracentrifugation (100,000 g)
248	sEV	16.5	120	0.22		ExoQuick	Preclearing (300 g, 16,500 g) > Filtration (0.22 ??m) > Ultracentrifugation (120,000 g) > Exo-Quick
249	lEV	4.2	3			Acetone precipitation	Preclearing (4200 g) > Acetone precipitation > Centrifugation (3000 g)
250	sEV	16.5	200				Preclearing (4200 g, 3000 g, 16,500 g) > Sucrose cushion ultracentrifugation (200,000 g) > Ultracentrifugation (200,000 g)
251	Both	0.7	120				Preclearing (500 g, 700 g) > Ultracentrifugation (120,000 g)
252	Both	4	120		10		Preclearing (500 g, 2000 g, 4000 g) > Concentration (10 kDa) > Ultracentrifugation (120,000 g) > Iodixanol density gradient ultracentrifugation (120,000 g) > Concentration (10 kDa)
253	sEV	20	100				Preclearing (300 g, 20,000 g) > Ultracentrifugation (100,000 g)
254	Mv						Preclearing (10,000 g) > Filtration (0.45 ??m) > Ultracentrifugation (150,000 g) > Sucrose cushion ultracentrifugation (160,000 g) > Ultracentrifugation (160,000 g)
255	sEV	10	120				Preclearing (300 g, 2000 g, 10,000 g) > Ultracentrifugation (120,000 g)
256	sEV	20	100			PEG precipitation	Preclearing (2000 g, 10,000 g, 20,000 g) > PEG precipitation > Centrifugation (12,000 g) > Iodixanol density gradient ultracentrifugation (100,000 g) > Ultracentrifugation (100,000 g)
257	Both	1.2	100	0.2			Preclearing (1200 g) > Filtration (0.2 ??m) > Ultracentrifugation (100,000 g)
258	lEV	3	1.5			ExoQuick	Preclearing (3000 g) > ExoQuik > Centrifugation (1500 g)
259	sEV	20	120				Preclearing (3000 g, 20,000 g) > Ultracentrifugation (120,000 g)
260	#N/A	0.5	#N/A	0.22	100	Gel filtration, binding (cholera toxin B)	Preclearing (500 g) > Filtration (0.22 ??m) > Concentration (100 kDa) > Filtration (0.22 ??m) >Gel filtration > Binding with cholera toxin B
261	Mv						Preclearing (7500 g) > Filtration (0.22 ??m) > Ultracentrifugation (110,000 g) > Iodixanol density gradient ultracentrifugation (100,000 g) > Ultracentrifugation (110,000 g)
262	Mv						Preclearing (7500 g, 10,000 g) > Filtration (0.22 ??m) > Ultracentrifugation (110,000 g) > Iodixanol density gradient ultracentrifugation (100,000 g) > Ultracentrifugation (110,000 g)
263	lEV	2	10				Preclearing (2000 g) > Centrifugation (10,000 g)
264	sEV	10	200				Preclearing (2000 g, 10,000 g) > Ultracentrifugation (110,000 g) > Sucrose density gradient ultracentrifugation (200,000 g)
265	Mv						Preclearing (10,000 g) > Filtration (0.22 ??m) > Ultracentrifugation (150,000 g) > Concentration (100 kDa)
266	sEV	10	100				Preclearing (300 g, 2000 g, 10,000 g) > Ultracentrifugation (100,000 g) > Sucrose density gradient ultracentrifugation (100,000 g)
267	Both	2	100			PEG precipitation	Preclearing (500 g, 2000 g) > PEG precipitation > Centrifugation (3214 g) > Ultracentrifugation (100,000 g)
268	sEV	10	110				Preclearing (300 g, 1800 g, 10,000 g) > Ultracentrifugation (110,000 g)
269	lEV	2.6	20	5			Preclearing (2600 g) > Filtration (5 ??m) > Centrifugation (20,000 g)
270	lEV	2.6	20	5		Affinity chromatography coupled with filter system	Preclearing (2600 g) > Filtration (5 ??m) > Affinity chromatography coupled with filter system > Centrifugation (20,000 g)
271	Mv						Preclearing (7025 g) > Filtration (0.22 ??m) > Concentration (100 kDa) > Ultracentrifugation (100,000 g) > Iodixanol density gradient ultracentrifugation (111,132 g) > Ultracentrifugation (100,000 g)
272	#N/A	14	14	0.22	3.5	Dialysis, Total Exosome Isolation Kit	Preclearing (2000 g, 14,000 g) > Dialysis > Concentration (3.5 kDa) > Filtration (0.22 ??m) > Total Exosome Isolation kit > Centrifugation (14,000 g)
273	Mv						Preclearing (6000 g) > Filtration (0.45 ??m) > Centrifugation (20,000 g, 40,000 g) > Ultracentrifugation (150,000 g) > Sucrose density gradient ultracentrifugation (200,000 g)
274	sEV	10	100				Preclearing (3000 g, 10,000 g) > Ultracentrifugation (100,000 g)
275	#N/A	15	#N/A			Homogenization	Homogenization > Preclearing (15,000 g) > Protein organic solvent precipitation
276	lEV	3	3	0.22		PEG precipitation	Preclearing (500 g, 3000 g) > Filtration (0.22 ??m) > PEG precipitation > Centrifugation (3000 g)
277	#N/A	0.5	#N/A			Size exclusion chromatography	Preclearing (500 g) > Size exclusion chromatography
278	#N/A	3	#N/A	0.22	10		Preclearing (300 g, 3000 g) > Concentration (10 kDa) > Filtration (0.22 ??m)
279	Both	3	152.813	0.45	100		Preclearing (3000 rpm) > Filtration (0.45 ??m) > Concentration (100 kDa) > Ultracentrifugation (152,813 g)
280	Both	1	100				Preclearing (300 g, 1000 g) > Ultracentrifugation (100,000 g) > Sucrose cushion ultracentrifugation (100,000 g) > Ultracentrifugation (100,000 g)
281	sEV	16	120				Preclearing (2000 g, 16,000 g) > Ultracentrifugation (120,000 g)
282	sEV	20	120	1			Preclearing (1500 g, 13,000 g) > Filtration (1.0 ??m) > Preclearing (20,000 g) > Ultracentrifugation (120,000 g) > Iodixanol density gradient ultracentrifugation (100,000 g) > Ultracentrifugation (120,000 g)
283	sEV	13	120	1			Preclearing (1500 g, 13,000 g) > Filtration (1.0 ??m) > Ultracentrifugation (20,000 g) > Iodixanol density gradient ultracentrifugation (38,000 g) > Ultracentrifugation (120,000 g)
284	Mv						Preclearing (20,000 g, 40,000 g) > Filtration (0.45 ??m) > Filtration (0.2 ??m) > Ultracentrifugation (150,000 g)
285	sEV	10	100				Preclearing (1000 g, 10,000 g) > Ultracentrifugation (100,000 g)
286	sEV	20	100				Preclearing (1200 g, 12,000 g, 20,000 g) > Ultracentrifugation (100,000 g)
287	#N/A	2	#N/A		1000	Hydrostatic filtration dialysis	Preclearing (2000 g) > Concentration (1000 kDa) > Hydrostatic filtration diaylsis (1000 kDa)
288	Mv						Preclearing (5000 g) > Filtration (0.22 ??m) > Concentration (100 kDa) > Ultracentrifugation (186,000 g) > Filtration (0.22 ??m)
289	sEV	12	110		3		Concentration (3 kDa) > Prelcearing (12,000 g) > Ultracentrifugation (110,000 g)
290	sEV	10	100				Preclearing (500 g, 2000 g, 10,000 g) > Ultracentrifugation (100,000 g)
291	sEV	18	200	0.45			Filtration (0.45 ??m) > Preclearing (18,000 g) > Ultracentrifugation (200,000 g)
292	sEV	10	192				Preclearing (200 g, 500 g, 10,000 g) > Ultracentrifugation (100,000 g) > Sucrose cushion ultracentrifugation (192,000 g) > Iodixanol density gradient ultracentrifugation (192,000 g) > Ultracentrifugation (192,000 g)
293	#N/A	10	#N/A	0.22		Exosome Isolation Kit	Preclearing (300 g, 3000 g, 10,000 g) > Exosome Isolation kit > Filtration (0.22 ??m)
294	Both	4	100				Preclearing (160 g, 4000 g) > Ultracentrifugation (100,000 g)
295	Mv						Preclearing (4000 g) > Filtration (0.45 ??m) > Concentration (100 kDa) > Filtration (0.45 ??m) > Ultracentrifugation (40,000 g)
296	Both	3.5	100		100		Preclearing (1000 rpm, 3500 rpm) > Concentration (100 kDa) > Ultracentrifugation (100,000 g)
297	Both	3.5	100	0.22			Preclearing (3500 g) > Filtration (0.22 ??m) > Ultracentrifugation (100,000 g)
298	Both	0.5	100				Preclearing (300 g, 500 g) > Ultracentrifugation (100,000 g)
299	Mv						Preclearing (2500 g) > Filtration (0.22 ??m) > Ultracentrifugation (175,000 g)
300	sEV	16.5	178				Preclearing (300 g, 16,500 g) > Ultracentrifugation (118,000 g) > Iodixanol density gradient ultracentrifugation (178,000 g) > Ultracentrifugation (118,000 g)
301	sEV	40	100	0.45			Preclearing (700 g) > Filtration (0.45 ??m) > Preclearing (10,000 g, 40,000 g) > Ultracentrifugation (100,000 g) > Iodixanol density gradient ultracentrifugation (100,000 g) > Ultracentrifugation (100,000 g)
302	sEV	10	100	0.2			Preclearing (500 g, 10,000 g) > Filtration (0.2 ??m) > Ultracentrifugation (100,000 g)
303	lEV	0.5	10				Preclearing (500 g) > Centrifugation (10,000 g)
304	Both	0.75	100				Preclearing (165 g, 750 g) > Ultracentrifugation (100,000 g)
305	sEV	16.5	110	0.2			Preclearing (300 g, 16,500 g) > Filtration (0.2 ??m) > Ultracentrifugation (110,000 g) > Sucrose cushion ultracentrifugation (110,000 g)
306	Both	2	110				Preclearing (2000 g) > Filtration (0.22 ??m) > Ultracentrifugation (110,000 g)
307	lEV	1.5	18				Preclearing (1500 g) > Ultracentrifugation (18,000 g)
308	Mv						Preclearing (10,000 g) > Filtration (0.45 ??m) > Concentration (500 kDa) > Filtration (0.22 ??m) > Ultracentrifugation (150,000 g)
309	Mv						Preclearing (9800 g) > Filtration (0.22 ??m) > Ultracentrifugation (235,000 g) > Iodixanol density gradient ultracentrifugation (288,000 g)
310	sEV	16	200	0.2			Preclearing (16,000 g) > Filtration (0.2 ??m) > Concentration (500 kDa) > Ultracentrifugation (150,000 g) > Sucrose cushion ultracentrifugation (200,000 g) > Ultracentrifugation (150,000 g)
311	#N/A	3.2	#N/A	0.2		miRCURY Exosome Isolation kit	Preclearing (3200 g) > Filtration (0.2 ??m) > miRCURY Exosome Isolation kit
312	#N/A	#N/A	#N/A			PEG precipitation	PEG precipitation
313	sEV	12	120				Preclearing (2000 g, 12,000 g) > Ultracentrifugation (120,000 g)
314	Both	4	100				Preclearing (2500 g, 4000 g) > Ultracentrifugation (100,000 g)
315	sEV	10	100	0.22			Preclearing (300 g, 2000 g, 10,000 g) > Filtration (0.22 ??m) > Ultracentrifugation (100,000 g)
316	Both	5	110	0.22			Preclearing (5000 g) > Filtration (0.22 ??m) > Ultracentrifugation (110,000 g) > Iodixanol density gradient ultracentrifugation (110,000 g) > Ultracentrifugation (110,000 g)
317	Mv						Preclearing (15,000 g) > Filtration (0.45 ??m) > Filtration (0.2 ??m) > Ultracentrifugation (100,000 g)
318	Both	3	270				Preclearing (3000 g) > Ultracentrifugation (270,000 g)
319	sEV	12	200				Preclearing (2000 g, 12,000 g) > Ultracentrifugation (110,000 g) > Sucrose cushion ultracentrifugation (200,000 g) > Ultracentrifugation (200,000 g)
320	sEV	10	100				Preclearing (300 g, 3000 g, 10,000 g) > Ultracentrifugation (100,000 g) > Sucrose cushion ultracentrifugation (100,000 g)
321	Mv						Preclearing (9000 g) > Filtration (0.45 ??m) > Concentration (10 kDa) > Concentration (100 kDa) > Preclearing (16,600 g) > Filtration (0.45 ??m) > Sucrose cushion ultracentrifugation (200,000 g) > Ultracentrifugation (100,000 g)
322	sEV	18	100				Preclearing (300 g, 2000 g, 18,000 g) > Ultracentrifugation (100,000 g)
323	lEV	2	18				Preclearing (300 g, 2000 g) > Ultracentrifugation (18,000 g)
324	Both	1.5	100				Preclearing (1500 g) > Ultracentrifugation (100,000 g)
325	Both	1.5	200				Preclearing (1500 g) > Ultracentrifugation (13,000 g) > Sucrose cushion ultracentrifugation (200,000 g) > Ultracentrifugation (100,000 g)
326	sEV	13	100				Preclearing (1500 g, 13,000 g) > Ultracentrifugation (100,000 g) > Sucrose cushion ultracentrifugation (200,000 g) > Ultracentrifugation (100,000 g)
327	Mv						Preclearing (6000 g) > Filtration (0.2 ??m) > Ultracentrifugation (100,000 g)
328	sEV	17	175				Preclearing (17,000 g) > Ultracentrifugation (175,000 g)
329	sEV	10	100	0.22			Preclearing (10,000 g) > Filtration (0.22 ??m) > Sucrose cushion ultracentrifugation (100,000 g) > Ultracentrifugation (100,000 g)
330	#N/A	16.5	#N/A	0.22	100	ExoQuick	Preclearing (300 g, 16,500 g) > Filtration (0.22 ??m) > Concentration (100 kDa) > ExoQuick
331	sEV	17	110				Preclearing (17,000 g) > Ultracentrifugation (110,000 g)
332	sEV	17	110			Size exclusion chromatography	Preclearing (17,000 g) > Ultracentrifugation (110,000 g) > Size exclusion chromatography
333	sEV	10	120		3		Preclearing (300 g, 2,000 g, 10,000 g) > Concentration (3 kDa) > Ultracentrifugation (120,000 g)
334	#N/A	#N/A	#N/A			Total Exosome Isolation Kit	Total Exosome Isolation Reagent
335	sEV	10	100				Preclearing (2,800 g, 10,000 g) > Ultracentrifugation (100,000 g) > Iodixanol density gradient ultracentrifugation (100,000 g) > Ultracentrifugation (100,000 g)
336	sEV	16.5	120				Preclearing (300 g, 2,000 g, 16,500 g) > Ultracentrifugation (120,000 g)
337	Both	2	100		100		Preclearing (500 g, 2,000 g) > Concentration (100 kDa) > Centrifugation (16,000 g) > Ultracentrifugation (100,000 g)
338	lEV	2	16		100	Vn96-peptide Incubation	Preclearing (500 g, 2,000 g) > Concentration (100 kDa) > Centrifugation (16,000 g) > Vn96-peptide incubation
339	lEV	2	16		100	NP-40 treatment, Vn96-peptide incubation	Preclearing (500 g, 2,000 g) > NP-40 treatment > Concentration (100 kDa) > Centrifugation (16,000 g) > Vn96-peptide incubation
340	#N/A	0.3	#N/A	0.22	100	qEV size exclusion column	Preclearing (300 g) > Filtration (0.22 ??m) > Concentration (100 kDa) > qEV size exclusion column > Concentration (10 kDa)
341	sEV	70	100				Preclearing (5,000 g, 12,000 g, 35,000 g, 70,000 g) > Ultracentrifugation (100,000 g) > Iodixanol density gradient ultracentrifugation (100,000 g) > Ultracentrifugation (100,000 g)
342	Mv						Preclearing (10,000 g) > Filtration (0.45 ??m) > Ultracentrifugation (40,000 g) > Filtration (0.45 ??m) > Iodixanol density gradient ultracentrifugation (150,000 g) > Ultracentrifugation (40,000 g)
343	lEV	2	12.5	0.8			Preclearing (300 g, 2,000 g) > Filtration (0.8 ??m) > Centrifugation (12,500 g)
344	Both	2	100	0.2			Preclearing (300 g, 2,000 g) > Filtration (0.8 ??m) > Centrifugation (12,500 g) > Filtration (0.2 ??m) > Ultracentrifugation (100,000 g) > Iodixanol density gradient ultracentrifugation (100,000 g) > Ultracentrifugation (100,000 g)
345	sEV	10	100				Preclearing (400 g, 2,000 g, 10,000 g) > Ultracentrifugation (100,000 g)
346	Both	2	135				Preclearing (300 g, 2,000 g) > Ultracentrifugation (135,000 g)
347	Both	2	100				Preclearing (500 g, 2,000 g) > Ultracentrifugation (100,000 g)
348	sEV	12	100	0.22			Preclearing (1,000 g, 2,400 g, 12,000 g) > Filtration (0.45 ??m, 0.22 ??m) > Ultracentrifugation (100,000 g) > Sucrose cushion ultracentrifugation (100,000 g)
349	Mv						Preclearing (6,000 g) > Filtration (0.45 ??m) > Concentration (100 kDa) > Filtration (0.22 ??m) > Ultracentrifugation (150,000 g) > Iodixanol density gradient ultracentrifugation (200,000 g) > Filtration (0.22 ??m)
350	sEV	15	250	0.2			Preclearing (440 g, 2,000 g, 3,600 g, 15,000 g) > Filtration (0.2 ??m) > Ultracentrifugation (150,000 g) > Iodixanol density gradient ultracentrifugation (250,000 g) > Ultracentrifugation (150,000 g)
351	sEV	10	120				Preclearing (2,000 g, 10,000 g) > Ultracentrifugation (120,000 g)
352	Both	0.3	100	0.22			Preclearing (300 g) > Filtration (0.22 ??m) > Sucrose cushion ultracentrifugation (100,000 g) > Ultracentrifugation (100,000 g)
353	Mv						Preclearing (5,000 g) > Filtration (0.45 ??m, 0.22 ??m) > Ultracentrifugation (125,000 g)
354	Both	5	154	0.22			Preclearing (1,000 rpm, 5,000 rpm) > Filtration (0.22 ??m) > Ultracentrifugation (154,000 g)
355	sEV	20	100				Preclearing (1,200 g, 12,000 g, 20,000 g) > Sucrose cushion ultracentrifugation (100,000 g) > Ultracentrifugation (100,000 g)
356	sEV	10	110				Preclearing (300 g, 2,000 g, 10,000 g) > Ultracentrifugation (110,000 g)
357	sEV	10	100				Preclearing (500 g, 2,000 g, 10,000 g) > Ultracentrifugation (100,000 g)
358	#N/A	5	#N/A	0.22	10	Sixe exclusion chromatography	Preclearing (300 g, 5,000 g) > Filtration (0.22 ??m) > Concentration (10 kDa) > Size exclusion chromatography > Concentration (10 kDa)
359	Both	5	117.734	0.22			Preclearing (300 g, 5,000 g) > Filtration (0.22 ??m) > Ultracentrifugation (117,734 g)
360	Both	2.09	100				Preclearing (805 g, 2,090 g) > Ultracentrifugation (100,000 g) > Sucrose density gradient ultracentrifugation (100,000 g)
361	sEV	10	100			Immersion in extracellular fluid extraction buffer > Vacuum infiltration	Immersion in extracellular fluid extraction buffer > Vacuum infiltration > Preclearing (500 g, 10,000 g) > Ultracentrifugation (100,000 g)
362	#N/A	10	#N/A	0.22	3	ExoQuick-TC	Preclearing (10,000 g) > Filtration (0.22 ??m) > Concentration (3 kDa) > ExoQuick-TC
363	#N/A	10	#N/A			exoEasy Maxi	Preclearing (10,000 g) > exoEasy Maxi
364	#N/A	#N/A	#N/A			ExoQuick-TC	ExoQuick-TC
365	Mv						Preclearing (5,000 g) > Filtration (0.22 ??m) > Ultracentrifugation (175,000 g)
366	Mv						Preclearing (4,000 g) > Filtration (0.22 ??m) > Concentration (10 kDa) > Ultracentrifugation (150,000 g)
367	sEV	10	100			PEG precipitation	Preclearing (500 g, 2,000 g, 10,000 g) > PEG precipitation > Centrifugation (10,000 g) > Ultracentrifugation (100,000 g) > Iodixanol density gradient ultracentrifugation (100,000 g) > Ultracentrifugation (100,000 g)
368	Mv						Preclearing (3,940 g) > Filtration (0.2 ??m) > Ultracentrifugation (100,000 g) > Iodixanol density gradient ultracentrifugation (100,000 g)
369	Mv						Preclearing (6,000 g) > Filtration (0.22 ??m) > Concentration (500 kDa) > Ultracentrifugation (150,000 g)
370	lEV	0.3	10				Preclearing (300 g) > Centrifugation (10,000 g)
371	Both	0.3	100				Preclearing (300 g) > Centrifugation (10,000 g) > Ultracentrifugation (100,000 g)
372	Both	3	120	0.2			Preclearing (300 g, 3,000 g) > Filtration (0.2 ??m) > Ultracentrifugation (120,000 g) > Iodixanol density gradient ultracentrifugation (100,000 g) > Ultracentrifugation (120,000 g)
373	Both	#N/A	100	0.2			Preclearing > Filtration (0.2 ??m) > Centrifugation (10,000 g) > Ultracentrifugation (100,000 g)
374	sEV	17	160				Preclearing (3,000 g, 17,000 g) > Ultracentrifugation (160,000 g)
375	Both	0.2	100	0.2	10		Preclearing (200 g) > Filtration (0.45 ??m) > Concentration (10 kDa) > Filtration (0.2 ??m) > Iodixanol density gradient ultracentrifugation (100,000 g) > Ultracentrifugation (100,000 g)
376	sEV	12	120		10		Preclearing (500 g, 2,000 g, 4,000 g) > Concentration (10 kDa) > Preclearing (12,000 g) > Ultracentrifugation (120,000 g) > Iodixanol density gradient ultracentrifugation (120,000 g) > Concentration (10 kDa)
377	sEV	10	100	0.22			Preclearing (10,000 g) > Filtration (0.22 ??m) > Ultracentrifugation (100,000 g)
