# Supplementary material for: Extracellular Vesicle Proteomes Shed Light on the Evolutionary, Interactive, and Functional Divergence of Their Biogenesis Mechanisms
Source: Front Cell Dev Biol. 2021 Oct 1;9:734950. doi: 10.3389/fcell.2021.734950 (PMC8517337; doi:10.3389/fcell.2021.734950)
Supplement: Supplementary Table 2 — Identification frequencies of human vesicular proteins in EVpedia. fsEV and flEV indicate the number of times the protein was identified in an sEV or lEV dataset, divided by the total number of datasets, and ICpro and ICeu indicate the number of times an ortholog of the protein was identified in prokaryotic or eukaryotic dataset in EVpedia. [file Table_2.XLSX]

## Sheet: Table detail
Supplementary Table 2
Table	Table title	Description	Column title	Details
2	Identification frequencies of sEV and lEV (fsEV and flEV) and identification count of prokaryotic and eukaryotic EV (ICpro and ICeu) for human vesicular proteins in EVpedia	Raw data for Figure 1, Figure 2 and Supplementary Figure 1	Index	Row index
			Uniprot	Uniprot ID of EV protein
			EntrezID	NCBI gene ID of EV protein
			GeneSymbol	NCBI offical gene symbol of EV protein
			ProteinSymbol	Uniprot protein name of EV protein
			Description	Uniprot protein description of EV protein
			ICsEV	Identification count, calculated among small EV datasets
			IClEV	Identification count, calculated among large EV datasets
			ICHuman	Identification count, calculated among all human EV datasets
			fsEV(ICsEV/207)	Identification frequency, calculated among small EV datasets
			flEV(IClEV/51)	Identification frequency, calculated among large datasets
			Diff. (sEV-lEV)	Difference of identification frequency between small and large datasets
			log2(fsEV/flEV)	Log2 ratio of identification frequency between small and large datasets
			ICpro	Identification count, calculated among all prokaryotic EV datasets
			ICeu	Identification count, calculated among all eukaryotic EV datasets

## Sheet: SupTable2
Supplementary Table 2. Identification frequencies of sEV and lEV (fsEV and flEV) and identification count of prokaryotic and eukaryotic EV (ICpro and ICeu) for human vesicular proteins in EVpedia.
Index	Uniprot	EntrezID	GeneSymbol	ProteinSymbol	Description	ICsEV	IClEV	ICHuman	fsEV(ICsEV/207)	flEV(IClEV/51)	Diff. (sEV-lEV)	log2(fsEV/flEV)	ICpro	ICeu
1644	P04406	2597	GAPDH	G3P	Glyceraldehyde-3-phosphate dehydrogenase (GAPDH) (EC 1.2.1.12) (Peptidyl-cysteine S-nitrosylase GAPDH) (EC 2.6.99.-)	162	41	410	0.79803	0.803922	-0.00589201	-0.0106126	51	547
1362	P06733	2023	ENO1	ENOA	Alpha-enolase (EC 4.2.1.11) (2-phospho-D-glycerate hydro-lyase) (C-myc promoter-binding protein) (Enolase 1) (MBP-1) (MPB-1) (Non-neural enolase) (NNE) (Phosphopyruvate hydratase) (Plasminogen-binding protein)	168	40	402	0.827586	0.784314	0.0432725	0.0774788	42	553
3350	P14618	5315	PKM	KPYM	Pyruvate kinase PKM (EC 2.7.1.40) (Cytosolic thyroid hormone-binding protein) (CTHBP) (Opa-interacting protein 3) (OIP-3) (Pyruvate kinase 2/3) (Pyruvate kinase muscle isozyme) (Thyroid hormone-binding protein 1) (THBP1) (Tumor M2-PK) (p58)	157	40	394	0.773399	0.784314	-0.0109147	-0.0202179	43	508
2182	P11142	3312	HSPA8	HSP7C	Heat shock cognate 71 kDa protein (Heat shock 70 kDa protein 8) (Lipopolysaccharide-associated protein 1) (LAP-1) (LPS-associated protein 1)	171	36	392	0.842365	0.705882	0.136482	0.255017	40	568
216	P07355	302	ANXA2	ANXA2	Annexin A2 (Annexin II) (Annexin-2) (Calpactin I heavy chain) (Calpactin-1 heavy chain) (Chromobindin-8) (Lipocortin II) (Placental anticoagulant protein IV) (PAP-IV) (Protein I) (p36)	150	41	380	0.738916	0.803922	-0.0650053	-0.121644	0	542
4929	P63104	7534	YWHAZ	1433Z	14-3-3 protein zeta/delta (Protein kinase C inhibitor protein 1) (KCIP-1)	152	36	376	0.748768	0.705882	0.0428861	0.0850919	0	553
2552	P00338	3939	LDHA	LDHA	L-lactate dehydrogenase A chain (LDH-A) (EC 1.1.1.27) (Cell proliferation-inducing gene 19 protein) (LDH muscle subunit) (LDH-M) (Renal carcinoma antigen NY-REN-59)	145	36	370	0.714286	0.705882	0.00840336	0.0170735	23	530
4924	P62258	7531	YWHAE	1433E	14-3-3 protein epsilon (14-3-3E)	160	31	366	0.788177	0.607843	0.180334	0.374821	0	553
2554	P07195	3945	LDHB	LDHB	L-lactate dehydrogenase B chain (LDH-B) (EC 1.1.1.27) (LDH heart subunit) (LDH-H) (Renal carcinoma antigen NY-REN-46)	148	33	363	0.729064	0.647059	0.0820052	0.172149	23	530
3275	P07737	5216	PFN1	PROF1	Profilin-1 (Epididymis tissue protein Li 184a) (Profilin I)	145	40	361	0.714286	0.784314	-0.070028	-0.13493	0	432
167	P04075	226	ALDOA	ALDOA	Fructose-bisphosphate aldolase A (EC 4.1.2.13) (Lung cancer antigen NY-LU-1) (Muscle-type aldolase)	150	33	359	0.738916	0.647059	0.0918574	0.191514	2	484
223	P08758	308	ANXA5	ANXA5	Annexin A5 (Anchorin CII) (Annexin V) (Annexin-5) (Calphobindin I) (CBP-I) (Endonexin II) (Lipocortin V) (Placental anticoagulant protein 4) (PP4) (Placental anticoagulant protein I) (PAP-I) (Thromboplastin inhibitor) (Vascular anticoagulant-alpha) (VAC-alpha)	145	38	359	0.714286	0.745098	-0.0308123	-0.060929	0	542
3162	Q06830	5052	PRDX1	PRDX1	Peroxiredoxin-1 (EC 1.11.1.15) (Natural killer cell-enhancing factor A) (NKEF-A) (Proliferation-associated gene protein) (PAG) (Thioredoxin peroxidase 2) (Thioredoxin-dependent peroxide reductase 2)	147	37	356	0.724138	0.72549	-0.00135227	-0.0026916	41	514
3454	P62937	5478	PPIA	PPIA	Peptidyl-prolyl cis-trans isomerase A (PPIase A) (EC 5.2.1.8) (Cyclophilin A) (Cyclosporin A-binding protein) (Rotamase A) [Cleaved into: Peptidyl-prolyl cis-trans isomerase A, N-terminally processed]	160	35	353	0.788177	0.686275	0.101903	0.199735	22	494
793	P23528	1072	CFL1	COF1	Cofilin-1 (18 kDa phosphoprotein) (p18) (Cofilin, non-muscle isoform)	143	38	351	0.704433	0.745098	-0.0406645	-0.0809668	0	470
3289	P00558	5230	PGK1	PGK1	Phosphoglycerate kinase 1 (EC 2.7.2.3) (Cell migration-inducing gene 10 protein) (Primer recognition protein 2) (PRP 2)	143	31	349	0.704433	0.607843	0.0965904	0.212764	16	474
56	P60709	60	ACTB	ACTB	Actin, cytoplasmic 1 (Beta-actin) [Cleaved into: Actin, cytoplasmic 1, N-terminally processed]	138	41	348	0.679803	0.803922	-0.124119	-0.241938	0	592
868	Q00610	1213	CLTC	CLH1	Clathrin heavy chain 1 (Clathrin heavy chain on chromosome 17) (CLH-17)	145	37	347	0.714286	0.72549	-0.0112045	-0.0224549	0	451
2832	P26038	4478	MSN	MOES	Moesin (Membrane-organizing extension spike protein)	145	31	347	0.714286	0.607843	0.106443	0.232802	0	502
4699	P60174	7167	TPI1	TPIS	Triosephosphate isomerase (TIM) (EC 5.3.1.1) (Triose-phosphate isomerase)	154	30	347	0.758621	0.588235	0.170385	0.366985	19	442
5094	P62805	8294	H4C9	H4	Histone H4	152	26	346	0.748768	0.509804	0.238965	0.554577	0	487
2189	P07900	3320	HSP90AA1	HS90A	Heat shock protein HSP 90-alpha (Heat shock 86 kDa) (HSP 86) (HSP86) (Lipopolysaccharide-associated protein 2) (LAP-2) (LPS-associated protein 2) (Renal carcinoma antigen NY-REN-38)	144	27	344	0.70936	0.529412	0.179948	0.422127	31	526
2195	P08238	3326	HSP90AB1	HS90B	Heat shock protein HSP 90-beta (HSP 90) (Heat shock 84 kDa) (HSP 84) (HSP84)	140	28	343	0.689655	0.54902	0.140636	0.329018	31	526
2462	P04264	3848	KRT1	K2C1	Keratin, type II cytoskeletal 1 (67 kDa cytokeratin) (Cytokeratin-1) (CK-1) (Hair alpha protein) (Keratin-1) (K1) (Type-II keratin Kb1)	114	34	339	0.561576	0.666667	-0.10509	-0.247483	0	437
4923	P31946	7529	YWHAB	1433B	14-3-3 protein beta/alpha (Protein 1054) (Protein kinase C inhibitor protein 1) (KCIP-1) [Cleaved into: 14-3-3 protein beta/alpha, N-terminally processed]	145	34	338	0.714286	0.666667	0.047619	0.0995357	0	553
6151	Q8WUM4	10015	PDCD6IP	PDC6I	Programmed cell death 6-interacting protein (PDCD6-interacting protein) (ALG-2-interacting protein 1) (ALG-2-interacting protein X) (Hp95)	147	22	337	0.724138	0.431373	0.292765	0.74733	0	432
856	O00299	1192	CLIC1	CLIC1	Chloride intracellular channel protein 1 (Chloride channel ABP) (Nuclear chloride ion channel 27) (NCC27) (Regulatory nuclear chloride ion channel protein) (hRNCC)	143	29	333	0.704433	0.568627	0.135806	0.30898	0	406
2566	Q08380	3959	LGALS3BP	LG3BP	Galectin-3-binding protein (Basement membrane autoantigen p105) (Lectin galactoside-binding soluble 3-binding protein) (Mac-2-binding protein) (MAC2BP) (Mac-2 BP) (Tumor-associated antigen 90K)	137	19	333	0.674877	0.372549	0.302328	0.857194	0	393
1576	P02751	2335	FN1	FINC	Fibronectin (FN) (Cold-insoluble globulin) (CIG) [Cleaved into: Anastellin; Ugl-Y1; Ugl-Y2; Ugl-Y3]	134	24	332	0.660099	0.470588	0.18951	0.488216	0	401
2178	P11021	3309	HSPA5	GRP78	78 kDa glucose-regulated protein (GRP-78) (Endoplasmic reticulum lumenal Ca(2+)-binding protein grp78) (Heat shock 70 kDa protein 5) (Immunoglobulin heavy chain-binding protein) (BiP)	127	34	332	0.625616	0.666667	-0.0410509	-0.0916887	40	568
2900	P35579	4627	MYH9	MYH9	Myosin-9 (Cellular myosin heavy chain, type A) (Myosin heavy chain 9) (Myosin heavy chain, non-muscle IIa) (Non-muscle myosin heavy chain A) (NMMHC-A) (Non-muscle myosin heavy chain IIa) (NMMHC II-a) (NMMHC-IIA)	137	36	332	0.674877	0.705882	-0.0310055	-0.0648035	0	508
12341	P07437	203068	TUBB	TBB5	Tubulin beta chain (Tubulin beta-5 chain)	133	34	332	0.655172	0.666667	-0.0114943	-0.025091	0	544
1287	P68104	1915	EEF1A1	EF1A1	Elongation factor 1-alpha 1 (EF-1-alpha-1) (Elongation factor Tu) (EF-Tu) (Eukaryotic elongation factor 1 A-1) (eEF1A-1) (Leukocyte receptor cluster member 7)	135	32	331	0.665025	0.627451	0.0375737	0.083905	0	511
4862	P55072	7415	VCP	TERA	Transitional endoplasmic reticulum ATPase (TER ATPase) (EC 3.6.4.6) (15S Mg(2+)-ATPase p97 subunit) (Valosin-containing protein) (VCP)	130	30	331	0.640394	0.588235	0.0521588	0.122567	0	479
1298	P13639	1938	EEF2	EF2	Elongation factor 2 (EF-2)	136	28	326	0.669951	0.54902	0.120931	0.287197	51	449
4872	P15311	7430	EZR	EZRI	Ezrin (Cytovillin) (Villin-2) (p81)	132	36	324	0.650246	0.705882	-0.055636	-0.118441	0	502
358	P05023	476	ATP1A1	AT1A1	Sodium/potassium-transporting ATPase subunit alpha-1 (Na(+)/K(+) ATPase alpha-1 subunit) (EC 3.6.3.9) (Sodium pump subunit alpha-1)	135	34	322	0.665025	0.666667	-0.00164204	-0.00355782	7	447
6834	P27348	10971	YWHAQ	1433T	14-3-3 protein theta (14-3-3 protein T-cell) (14-3-3 protein tau) (Protein HS1)	138	29	322	0.679803	0.568627	0.111176	0.257633	0	553
2464	P35908	3849	KRT2	K22E	Keratin, type II cytoskeletal 2 epidermal (Cytokeratin-2e) (CK-2e) (Epithelial keratin-2e) (Keratin-2 epidermis) (Keratin-2e) (K2e) (Type-II keratin Kb2)	101	32	321	0.497537	0.627451	-0.129914	-0.334699	0	330
4926	P61981	7532	YWHAG	1433G	14-3-3 protein gamma (Protein kinase C inhibitor protein 1) (KCIP-1) [Cleaved into: 14-3-3 protein gamma, N-terminally processed]	136	30	319	0.669951	0.588235	0.0817154	0.187662	0	553
2362	P05556	3688	ITGB1	ITB1	Integrin beta-1 (Fibronectin receptor subunit beta) (Glycoprotein IIa) (GPIIA) (VLA-4 subunit beta) (CD antigen CD29)	119	30	314	0.586207	0.588235	-0.0020284	-0.00498341	0	430
4136	O00560	6386	SDCBP	SDCB1	Syntenin-1 (Melanoma differentiation-associated protein 9) (MDA-9) (Pro-TGF-alpha cytoplasmic domain-interacting protein 18) (TACIP18) (Scaffold protein Pbp1) (Syndecan-binding protein 1)	134	18	314	0.660099	0.352941	0.307157	0.903254	0	391
5004	P51149	7879	RAB7A	RAB7A	Ras-related protein Rab-7a	130	21	314	0.640394	0.411765	0.228629	0.63714	0	398
2477	P35527	3857	KRT9	K1C9	Keratin, type I cytoskeletal 9 (Cytokeratin-9) (CK-9) (Keratin-9) (K9)	102	29	310	0.502463	0.568627	-0.0661644	-0.178466	0	318
1482	P49327	2194	FASN	FAS	Fatty acid synthase (EC 2.3.1.85) [Includes: [Acyl-carrier-protein] S-acetyltransferase (EC 2.3.1.38); [Acyl-carrier-protein] S-malonyltransferase (EC 2.3.1.39); 3-oxoacyl-[acyl-carrier-protein] synthase (EC 2.3.1.41); 3-oxoacyl-[acyl-carrier-protein] reductase (EC 1.1.1.100); 3-hydroxyacyl-[acyl-carrier-protein] dehydratase (EC 4.2.1.59); Enoyl-[acyl-carrier-protein] reductase (EC 1.3.1.39); Ole…	126	27	309	0.62069	0.529412	0.0912779	0.229482	1	381
4235	P08195	6520	SLC3A2	4F2	4F2 cell-surface antigen heavy chain (4F2hc) (4F2 heavy chain antigen) (Lymphocyte activation antigen 4F2 large subunit) (Solute carrier family 3 member 2) (CD antigen CD98)	132	26	309	0.650246	0.509804	0.140442	0.351044	17	412
214	P04083	301	ANXA1	ANXA1	Annexin A1 (Annexin I) (Annexin-1) (Calpactin II) (Calpactin-2) (Chromobindin-9) (Lipocortin I) (Phospholipase A2 inhibitory protein) (p35)	115	29	308	0.566502	0.568627	-0.00212499	-0.00540152	0	542
1747	P62873	2782	GNB1	GBB1	Guanine nucleotide-binding protein G(I)/G(S)/G(T) subunit beta-1 (Transducin beta chain 1)	132	32	308	0.650246	0.627451	0.0227953	0.0514835	0	431
5890	P30041	9588	PRDX6	PRDX6	Peroxiredoxin-6 (EC 1.11.1.15) (1-Cys peroxiredoxin) (1-Cys PRX) (24 kDa protein) (Acidic calcium-independent phospholipase A2) (aiPLA2) (EC 3.1.1.-) (Antioxidant protein 2) (Liver 2D page spot 40) (Non-selenium glutathione peroxidase) (NSGPx) (EC 1.11.1.9) (Red blood cells page spot 12)	126	27	308	0.62069	0.529412	0.0912779	0.229482	41	514
61	O43707	81	ACTN4	ACTN4	Alpha-actinin-4 (Non-muscle alpha-actinin 4)	116	34	307	0.571429	0.666667	-0.0952381	-0.222392	0	536
148	P02768	213	ALB	ALBU	Serum albumin	139	36	306	0.684729	0.705882	-0.0211533	-0.0438945	0	417
4642	Q9Y490	7094	TLN1	TLN1	Talin-1	126	34	306	0.62069	0.666667	-0.045977	-0.103093	0	381
3786	P51148	5878	RAB5C	RAB5C	Ras-related protein Rab-5C (L1880) (RAB5L)	120	30	303	0.591133	0.588235	0.00289771	0.00708942	0	394
3814	P61224	5908	RAP1B	RAP1B	Ras-related protein Rap-1b (GTP-binding protein smg p21B)	125	28	302	0.615764	0.54902	0.0667439	0.165519	0	533
6767	P61026	10890	RAB10	RAB10	Ras-related protein Rab-10	130	25	301	0.640394	0.490196	0.150198	0.385601	0	410
132	P23526	191	AHCY	SAHH	Adenosylhomocysteinase (AdoHcyase) (EC 3.3.1.1) (S-adenosyl-L-homocysteine hydrolase)	122	26	300	0.600985	0.509804	0.0911813	0.237387	16	383
1384	P27105	2040	STOM	STOM	Erythrocyte band 7 integral membrane protein (Protein 7.2b) (Stomatin)	125	22	300	0.615764	0.431373	0.184391	0.513442	34	413
4564	P32119	7001	PRDX2	PRDX2	Peroxiredoxin-2 (EC 1.11.1.15) (Natural killer cell-enhancing factor B) (NKEF-B) (PRP) (Thiol-specific antioxidant protein) (TSA) (Thioredoxin peroxidase 1) (Thioredoxin-dependent peroxide reductase 1)	118	26	299	0.581281	0.509804	0.0714769	0.189293	41	514
1937	P69905	3040	HBA2	HBA	Hemoglobin subunit alpha (Alpha-globin) (Hemoglobin alpha chain)	138	25	298	0.679803	0.490196	0.189607	0.471758	3	444
1728	P04899	2771	GNAI2	GNAI2	Guanine nucleotide-binding protein G(i) subunit alpha-2 (Adenylate cyclase-inhibiting G alpha protein)	127	31	297	0.625616	0.607843	0.0177726	0.0415778	0	444
1845	P06396	2934	GSN	GELS	Gelsolin (AGEL) (Actin-depolymerizing factor) (ADF) (Brevin)	124	20	295	0.610837	0.392157	0.218681	0.639358	0	427
263	P02649	348	APOE	APOE	Apolipoprotein E (Apo-E)	132	17	294	0.650246	0.333333	0.316913	0.964021	0	347
1782	P06744	2821	GPI	G6PI	Glucose-6-phosphate isomerase (GPI) (EC 5.3.1.9) (Autocrine motility factor) (AMF) (Neuroleukin) (NLK) (Phosphoglucose isomerase) (PGI) (Phosphohexose isomerase) (PHI) (Sperm antigen 36) (SA-36)	118	28	293	0.581281	0.54902	0.0322612	0.0823776	16	372
6572	P78371	10576	CCT2	TCPB	T-complex protein 1 subunit beta (TCP-1-beta) (CCT-beta)	113	27	293	0.55665	0.529412	0.0272385	0.0723809	63	462
748	P60953	998	CDC42	CDC42	Cell division control protein 42 homolog (G25K GTP-binding protein)	121	23	292	0.596059	0.45098	0.145079	0.402391	0	533
1560	P21333	2316	FLNA	FLNA	Filamin-A (FLN-A) (Actin-binding protein 280) (ABP-280) (Alpha-filamin) (Endothelial actin-binding protein) (Filamin-1) (Non-muscle filamin)	120	28	292	0.591133	0.54902	0.0421134	0.106625	0	536
2186	P04792	3315	HSPB1	HSPB1	Heat shock protein beta-1 (HspB1) (28 kDa heat shock protein) (Estrogen-regulated 24 kDa protein) (Heat shock 27 kDa protein) (HSP 27) (Stress-responsive protein 27) (SRP27)	118	26	292	0.581281	0.509804	0.0714769	0.189293	0	336
2	P01023	2	A2M	A2MG	Alpha-2-macroglobulin (Alpha-2-M) (C3 and PZP-like alpha-2-macroglobulin domain-containing protein 5)	138	22	288	0.679803	0.431373	0.24843	0.656182	0	452
515	P01024	718	C3	CO3	Complement C3 (C3 and PZP-like alpha-2-macroglobulin domain-containing protein 1) [Cleaved into: Complement C3 beta chain; C3-beta-c (C3bc); Complement C3 alpha chain; C3a anaphylatoxin; Acylation stimulating protein (ASP) (C3adesArg); Complement C3b alpha' chain; Complement C3c alpha' chain fragment 1; Complement C3dg fragment; Complement C3g fragment; Complement C3d fragment; Complement C3f fra…	135	20	288	0.665025	0.392157	0.272868	0.761977	0	452
492	P35613	682	BSG	BASI	Basigin (5F7) (Collagenase stimulatory factor) (Extracellular matrix metalloproteinase inducer) (EMMPRIN) (Leukocyte activation antigen M6) (OK blood group antigen) (Tumor cell-derived collagenase stimulatory factor) (TCSF) (CD antigen CD147)	119	24	286	0.586207	0.470588	0.115619	0.316945	0	372
4716	P14625	7184	HSP90B1	ENPL	Endoplasmin (94 kDa glucose-regulated protein) (GRP-94) (Heat shock protein 90 kDa beta member 1) (Tumor rejection antigen 1) (gp96 homolog)	111	25	286	0.546798	0.490196	0.056602	0.157649	31	526
5133	P37802	8407	TAGLN2	TAGL2	Transgelin-2 (Epididymis tissue protein Li 7e) (SM22-alpha homolog)	105	31	286	0.517241	0.607843	-0.0906018	-0.232861	0	355
4587	P02786	7037	TFRC	TFR1	Transferrin receptor protein 1 (TR) (TfR) (TfR1) (Trfr) (T9) (p90) (CD antigen CD71) [Cleaved into: Transferrin receptor protein 1, serum form (sTfR)]	122	19	284	0.600985	0.372549	0.228436	0.689899	17	396
65	P12814	87	ACTN1	ACTN1	Alpha-actinin-1 (Alpha-actinin cytoskeletal isoform) (F-actin cross-linking protein) (Non-muscle alpha-actinin-1)	107	29	282	0.527094	0.568627	-0.0415339	-0.109425	0	536
5416	P46940	8826	IQGAP1	IQGA1	Ras GTPase-activating-like protein IQGAP1 (p195)	116	26	281	0.571429	0.509804	0.0616246	0.164631	0	360
6409	P68371	10383	TUBB4B	TBB4B	Tubulin beta-4B chain (Tubulin beta-2 chain) (Tubulin beta-2C chain)	110	23	281	0.541872	0.45098	0.0908915	0.264887	0	544
1673	P50395	2665	GDI2	GDIB	Rab GDP dissociation inhibitor beta (Rab GDI beta) (Guanosine diphosphate dissociation inhibitor 2) (GDI-2)	113	26	279	0.55665	0.509804	0.0468463	0.126829	0	417
1864	P09211	2950	GSTP1	GSTP1	Glutathione S-transferase P (EC 2.5.1.18) (GST class-pi) (GSTP1-1)	110	24	279	0.541872	0.470588	0.0712837	0.203487	0	378
855	P10909	1191	CLU	CLUS	Clusterin (Aging-associated gene 4 protein) (Apolipoprotein J) (Apo-J) (Complement cytolysis inhibitor) (CLI) (Complement-associated protein SP-40,40) (Ku70-binding protein 1) (NA1/NA2) (Testosterone-repressed prostate message 2) (TRPM-2) [Cleaved into: Clusterin beta chain (ApoJalpha) (Complement cytolysis inhibitor a chain); Clusterin alpha chain (ApoJbeta) (Complement cytolysis inhibitor b cha…	110	17	278	0.541872	0.333333	0.208539	0.700986	0	327
3760	P62820	5861	RAB1A	RAB1A	Ras-related protein Rab-1A (YPT1-related protein)	110	21	278	0.541872	0.411765	0.130107	0.396132	0	409
6492	Q01518	10487	CAP1	CAP1	Adenylyl cyclase-associated protein 1 (CAP 1)	113	26	278	0.55665	0.509804	0.0468463	0.126829	0	360
6660	P50990	10694	CCT8	TCPQ	T-complex protein 1 subunit theta (TCP-1-theta) (CCT-theta) (Renal carcinoma antigen NY-REN-15)	105	26	278	0.517241	0.509804	0.00743746	0.0208952	0	349
4789	P22314	7317	UBA1	UBA1	Ubiquitin-like modifier-activating enzyme 1 (EC 6.2.1.45) (Protein A1S9) (Ubiquitin-activating enzyme E1)	106	26	277	0.522167	0.509804	0.0123636	0.0345702	0	375
4860	P18206	7414	VCL	VINC	Vinculin (Metavinculin) (MV)	116	27	276	0.571429	0.529412	0.0420168	0.110183	0	387
6804	Q9H4M9	10938	EHD1	EHD1	EH domain-containing protein 1 (PAST homolog 1) (hPAST1) (Testilin)	121	18	273	0.596059	0.352941	0.243118	0.756028	0	404
3280	P18669	5223	PGAM1	PGAM1	Phosphoglycerate mutase 1 (EC 5.4.2.11) (EC 5.4.2.4) (BPG-dependent PGAM 1) (Phosphoglycerate mutase isozyme B) (PGAM-B)	115	23	272	0.566502	0.45098	0.115522	0.329018	8	373
3805	P62826	5901	RAN	RAN	GTP-binding nuclear protein Ran (Androgen receptor-associated protein 24) (GTPase Ran) (Ras-like protein TC4) (Ras-related nuclear protein)	104	23	272	0.512315	0.45098	0.0613349	0.183967	0	374
231	P50995	311	ANXA11	ANX11	Annexin A11 (56 kDa autoantigen) (Annexin XI) (Annexin-11) (Calcyclin-associated annexin 50) (CAP-50)	123	16	271	0.605911	0.313725	0.292186	0.949604	0	542
1326	P60842	1973	EIF4A1	IF4A1	Eukaryotic initiation factor 4A-I (eIF-4A-I) (eIF4A-I) (EC 3.6.4.13) (ATP-dependent RNA helicase eIF4A-1)	102	25	270	0.502463	0.490196	0.012267	0.0356586	15	412
4928	Q04917	7533	YWHAH	1433F	14-3-3 protein eta (Protein AS1)	110	23	269	0.541872	0.45098	0.0908915	0.264887	0	553
225	P08133	309	ANXA6	ANXA6	Annexin A6 (67 kDa calelectrin) (Annexin VI) (Annexin-6) (Calphobindin-II) (CPB-II) (Chromobindin-20) (Lipocortin VI) (Protein III) (p68) (p70)	107	27	268	0.527094	0.529412	-0.00231817	-0.00633109	0	542
2907	P60660	4637	MYL6	MYL6	Myosin light polypeptide 6 (17 kDa myosin light chain) (LC17) (Myosin light chain 3) (MLC-3) (Myosin light chain alkali 3) (Myosin light chain A3) (Smooth muscle and nonmuscle myosin light chain alkali 6)	98	23	268	0.482759	0.45098	0.0317782	0.0982373	0	452
4557	P17987	6950	TCP1	TCPA	T-complex protein 1 subunit alpha (TCP-1-alpha) (CCT-alpha)	101	24	268	0.497537	0.470588	0.0269487	0.0803384	63	462
2479	P13645	3858	KRT10	K1C10	Keratin, type I cytoskeletal 10 (Cytokeratin-10) (CK-10) (Keratin-10) (K10)	112	29	266	0.551724	0.568627	-0.0169033	-0.0435366	0	315
4611	P07996	7057	THBS1	TSP1	Thrombospondin-1	105	19	266	0.517241	0.372549	0.144692	0.473407	0	360
36	P53396	47	ACLY	ACLY	ATP-citrate synthase (EC 2.3.3.8) (ATP-citrate (pro-S-)-lyase) (ACL) (Citrate cleavage enzyme)	103	29	265	0.507389	0.568627	-0.0612383	-0.164391	34	359
6154	O75340	10016	PDCD6	PDCD6	Programmed cell death protein 6 (Apoptosis-linked gene 2 protein homolog) (ALG-2)	109	14	265	0.536946	0.27451	0.262436	0.967919	0	364
1750	P62879	2783	GNB2	GBB2	Guanine nucleotide-binding protein G(I)/G(S)/G(T) subunit beta-2 (G protein subunit beta-2) (Transducin beta chain 2)	110	23	264	0.541872	0.45098	0.0908915	0.264887	0	431
3624	O14818	5688	PSMA7	PSA7	Proteasome subunit alpha type-7 (EC 3.4.25.1) (Proteasome subunit RC6-1) (Proteasome subunit XAPC7)	93	22	263	0.458128	0.431373	0.0267555	0.0868166	0	343
3799	P11233	5898	RALA	RALA	Ras-related protein Ral-A	105	26	263	0.517241	0.509804	0.00743746	0.0208952	0	533
664	P40227	908	CCT6A	TCPZ	T-complex protein 1 subunit zeta (TCP-1-zeta) (Acute morphine dependence-related protein 2) (CCT-zeta-1) (HTR3) (Tcp20)	98	27	262	0.482759	0.529412	-0.0466531	-0.133088	0	340
1296	P26641	1937	EEF1G	EF1G	Elongation factor 1-gamma (EF-1-gamma) (eEF-1B gamma)	105	24	262	0.517241	0.470588	0.0466531	0.136372	17	362
3992	P23396	6188	RPS3	RS3	40S ribosomal protein S3 (EC 4.2.99.18) (Small ribosomal subunit protein uS3)	97	20	262	0.477833	0.392157	0.0856756	0.285074	50	369
8690	P61106	51552	RAB14	RAB14	Ras-related protein Rab-14	99	24	262	0.487685	0.470588	0.0170965	0.0514835	0	533
222	P09525	307	ANXA4	ANXA4	Annexin A4 (35-beta calcimedin) (Annexin IV) (Annexin-4) (Carbohydrate-binding protein p33/p41) (Chromobindin-4) (Endonexin I) (Lipocortin IV) (P32.5) (PP4-X) (Placental anticoagulant protein II) (PAP-II) (Protein II)	102	22	261	0.502463	0.431373	0.0710905	0.220083	0	542
3455	P23284	5479	PPIB	PPIB	Peptidyl-prolyl cis-trans isomerase B (PPIase B) (EC 5.2.1.8) (CYP-S1) (Cyclophilin B) (Rotamase B) (S-cyclophilin) (SCYLP)	92	30	260	0.453202	0.588235	-0.135033	-0.376239	0	311
287	P84077	375	ARF1	ARF1	ADP-ribosylation factor 1	96	25	258	0.472906	0.490196	-0.0172897	-0.0518043	0	533
683	P21926	928	CD9	CD9	CD9 antigen (5H9 antigen) (Cell growth-inhibiting gene 2 protein) (Leukocyte antigen MIC3) (Motility-related protein) (MRP-1) (Tetraspanin-29) (Tspan-29) (p24) (CD antigen CD9)	109	15	258	0.536946	0.294118	0.242828	0.868383	0	453
6566	Q99832	10574	CCT7	TCPH	T-complex protein 1 subunit eta (TCP-1-eta) (CCT-eta) (HIV-1 Nef-interacting protein) [Cleaved into: T-complex protein 1 subunit eta, N-terminally processed]	96	24	258	0.472906	0.470588	0.00231817	0.00708942	63	462
229	P20073	310	ANXA7	ANXA7	Annexin A7 (Annexin VII) (Annexin-7) (Synexin)	110	15	257	0.541872	0.294118	0.247754	0.881559	0	542
4771	P10599	7295	TXN	THIO	Thioredoxin (Trx) (ATL-derived factor) (ADF) (Surface-associated sulphydryl protein) (SASP)	100	22	257	0.492611	0.431373	0.0612383	0.191514	41	438
6111	O75083	9948	WDR1	WDR1	WD repeat-containing protein 1 (Actin-interacting protein 1) (AIP1) (NORI-1)	108	24	257	0.53202	0.470588	0.0614315	0.177014	0	319
6117	Q14764	9961	MVP	MVP	Major vault protein (MVP) (Lung resistance-related protein)	94	19	257	0.463054	0.372549	0.0905052	0.313751	0	330
1836	P30101	2923	PDIA3	PDIA3	Protein disulfide-isomerase A3 (EC 5.3.4.1) (58 kDa glucose-regulated protein) (58 kDa microsomal protein) (p58) (Disulfide isomerase ER-60) (Endoplasmic reticulum resident protein 57) (ER protein 57) (ERp57) (Endoplasmic reticulum resident protein 60) (ER protein 60) (ERp60)	88	29	256	0.433498	0.568627	-0.13513	-0.39146	41	438
2450	Q14974	3837	KPNB1	IMB1	Importin subunit beta-1 (Importin-90) (Karyopherin subunit beta-1) (Nuclear factor p97) (Pore targeting complex 97 kDa subunit) (PTAC97)	105	22	256	0.517241	0.431373	0.0858688	0.261903	0	342
3788	P63000	5879	RAC1	RAC1	Ras-related C3 botulinum toxin substrate 1 (Cell migration-inducing gene 5 protein) (Ras-like protein TC25) (p21-Rac1)	113	18	254	0.55665	0.352941	0.203709	0.657343	0	533
4759	P68366	7277	TUBA4A	TBA4A	Tubulin alpha-4A chain (Alpha-tubulin 1) (Testis-specific alpha-tubulin) (Tubulin H2-alpha) (Tubulin alpha-1 chain)	108	19	254	0.53202	0.372549	0.159471	0.514049	0	544
6292	O75955	10211	FLOT1	FLOT1	Flotillin-1	113	19	254	0.55665	0.372549	0.184101	0.579341	10	340
6570	P50991	10575	CCT4	TCPD	T-complex protein 1 subunit delta (TCP-1-delta) (CCT-delta) (Stimulator of TAR RNA-binding)	99	20	254	0.487685	0.392157	0.0955279	0.314518	63	462
301	P61586	387	RHOA	RHOA	Transforming protein RhoA (Rho cDNA clone 12) (h12)	106	21	253	0.522167	0.411765	0.110403	0.342692	0	533
384	P06576	506	ATP5F1B	ATPB	ATP synthase subunit beta, mitochondrial (EC 3.6.3.14)	80	31	253	0.394089	0.607843	-0.213754	-0.625179	50	335
2755	Q08431	4240	MFGE8	MFGM	Lactadherin (Breast epithelial antigen BA46) (HMFG) (MFGM) (Milk fat globule-EGF factor 8) (MFG-E8) (SED1) [Cleaved into: Lactadherin short form; Medin]	106	18	251	0.522167	0.352941	0.169226	0.565085	0	332
4225	Q15758	6510	SLC1A5	AAAT	Neutral amino acid transporter B(0) (ATB(0)) (Baboon M7 virus receptor) (RD114/simian type D retrovirus receptor) (Sodium-dependent neutral amino acid transporter type 2) (Solute carrier family 1 member 5)	110	18	250	0.541872	0.352941	0.188931	0.618524	6	340
4634	P29401	7086	TKT	TKT	Transketolase (TK) (EC 2.2.1.1)	83	24	250	0.408867	0.470588	-0.0617212	-0.202834	27	340
3619	P28066	5686	PSMA5	PSA5	Proteasome subunit alpha type-5 (EC 3.4.25.1) (Macropain zeta chain) (Multicatalytic endopeptidase complex zeta chain) (Proteasome zeta chain)	82	19	249	0.403941	0.372549	0.0313919	0.116714	1	371
1731	P08754	2773	GNAI3	GNAI3	Guanine nucleotide-binding protein G(k) subunit alpha (G(i) alpha-3)	101	26	248	0.497537	0.509804	-0.012267	-0.0351388	0	444
3283	P52209	5226	PGD	6PGD	6-phosphogluconate dehydrogenase, decarboxylating (EC 1.1.1.44)	92	25	248	0.453202	0.490196	-0.0369941	-0.113205	14	313
8366	Q9H223	30844	EHD4	EHD4	EH domain-containing protein 4 (Hepatocellular carcinoma-associated protein 10/11) (PAST homolog 4)	104	14	248	0.512315	0.27451	0.237805	0.900174	0	404
714	P16070	960	CD44	CD44	CD44 antigen (CDw44) (Epican) (Extracellular matrix receptor III) (ECMR-III) (GP90 lymphocyte homing/adhesion receptor) (HUTCH-I) (Heparan sulfate proteoglycan) (Hermes antigen) (Hyaluronate receptor) (Phagocytic glycoprotein 1) (PGP-1) (Phagocytic glycoprotein I) (PGP-I) (CD antigen CD44)	86	20	247	0.423645	0.392157	0.0314885	0.111426	0	319
729	P60033	975	CD81	CD81	CD81 antigen (26 kDa cell surface protein TAPA-1) (Target of the antiproliferative antibody 1) (Tetraspanin-28) (Tspan-28) (CD antigen CD81)	86	22	247	0.423645	0.431373	-0.00772723	-0.0260774	0	453
2722	P40925	4190	MDH1	MDHC	Malate dehydrogenase, cytoplasmic (EC 1.1.1.37) (Cytosolic malate dehydrogenase) (Diiodophenylpyruvate reductase) (EC 1.1.1.96)	99	25	247	0.487685	0.490196	-0.00251135	-0.00741014	23	530
6207	P61158	10096	ACTR3	ARP3	Actin-related protein 3 (Actin-like protein 3)	90	19	247	0.44335	0.372549	0.0708007	0.251015	0	592
4009	P62241	6202	RPS8	RS8	40S ribosomal protein S8 (Small ribosomal subunit protein eS8)	95	19	246	0.46798	0.372549	0.0954313	0.329018	0	339
6500	Q99536	10493	VAT1	VAT1	Synaptic vesicle membrane protein VAT-1 homolog (EC 1.-.-.-)	101	18	246	0.497537	0.352941	0.144596	0.495376	15	325
614	P52907	829	CAPZA1	CAZA1	F-actin-capping protein subunit alpha-1 (CapZ alpha-1)	92	23	245	0.453202	0.45098	0.00222158	0.00708942	0	331
2537	P08865	3921	RPSA	RSSA	40S ribosomal protein SA (37 kDa laminin receptor precursor) (37LRP) (37/67 kDa laminin receptor) (LRP/LR) (67 kDa laminin receptor) (67LR) (Colon carcinoma laminin-binding protein) (Laminin receptor 1) (LamR) (Laminin-binding protein precursor p40) (LBP/p40) (Multidrug resistance-associated protein MGr1-Ag) (NEM/1CHD4) (Small ribosomal subunit protein uS2)	86	21	245	0.423645	0.411765	0.0118806	0.0410368	42	335
4873	P08670	7431	VIM	VIME	Vimentin	89	22	245	0.438424	0.431373	0.0070511	0.0233912	0	310
6201	P59998	10093	ARPC4	ARPC4	Actin-related protein 2/3 complex subunit 4 (Arp2/3 complex 20 kDa subunit) (p20-ARC)	87	20	245	0.428571	0.392157	0.0364146	0.128105	0	310
2201	P98160	3339	HSPG2	PGBM	Basement membrane-specific heparan sulfate proteoglycan core protein (HSPG) (Perlecan) (PLC) [Cleaved into: Endorepellin; LG3 peptide]	97	16	244	0.477833	0.313725	0.164107	0.607002	0	281
2740	P61006	4218	RAB8A	RAB8A	Ras-related protein Rab-8A (Oncogene c-mel)	93	21	244	0.458128	0.411765	0.0463634	0.153931	0	410
10804	Q9H0U4	81876	RAB1B	RAB1B	Ras-related protein Rab-1B	93	15	244	0.458128	0.294118	0.16401	0.639358	0	409
3149	P07237	5034	P4HB	PDIA1	Protein disulfide-isomerase (PDI) (EC 5.3.4.1) (Cellular thyroid hormone-binding protein) (Prolyl 4-hydroxylase subunit beta) (p55)	83	27	243	0.408867	0.529412	-0.120545	-0.372759	41	438
3820	P61225	5912	RAP2B	RAP2B	Ras-related protein Rap-2b	86	21	243	0.423645	0.411765	0.0118806	0.0410368	0	533
424	P61769	567	B2M	B2MG	Beta-2-microglobulin [Cleaved into: Beta-2-microglobulin form pI 5.3]	89	22	242	0.438424	0.431373	0.0070511	0.0233912	0	289
882	P09543	1267	CNP	CN37	2',3'-cyclic-nucleotide 3'-phosphodiesterase (CNP) (CNPase) (EC 3.1.4.37)	104	23	242	0.512315	0.45098	0.0613349	0.183967	0	279
3854	P35241	5962	RDX	RADI	Radixin	106	12	242	0.522167	0.235294	0.286873	1.15005	0	502
3761	P61019	5862	RAB2A	RAB2A	Ras-related protein Rab-2A	91	24	241	0.448276	0.470588	-0.0223124	-0.0700784	0	533
3926	P18124	6129	RPL7	RL7	60S ribosomal protein L7 (Large ribosomal subunit protein uL30)	94	17	241	0.463054	0.333333	0.129721	0.474215	11	315
4031	P62269	6222	RPS18	RS18	40S ribosomal protein S18 (Ke-3) (Ke3) (Small ribosomal subunit protein uS13)	83	19	241	0.408867	0.372549	0.036318	0.134201	35	305
720	P13987	966	CD59	CD59	CD59 glycoprotein (1F5 antigen) (20 kDa homologous restriction factor) (HRF-20) (HRF20) (MAC-inhibitory protein) (MAC-IP) (MEM43 antigen) (Membrane attack complex inhibition factor) (MACIF) (Membrane inhibitor of reactive lysis) (MIRL) (Protectin) (CD antigen CD59)	91	14	240	0.448276	0.27451	0.173766	0.707529	0	278
1060	P07339	1509	CTSD	CATD	Cathepsin D (EC 3.4.23.5) [Cleaved into: Cathepsin D light chain; Cathepsin D heavy chain]	85	13	240	0.418719	0.254902	0.163817	0.716041	0	318
6403	P68363	10376	TUBA1B	TBA1B	Tubulin alpha-1B chain (Alpha-tubulin ubiquitous) (Tubulin K-alpha-1) (Tubulin alpha-ubiquitous chain) [Cleaved into: Detyrosinated tubulin alpha-1B chain]	89	23	240	0.438424	0.45098	-0.0125567	-0.0407391	0	544
6872	Q15286	11021	RAB35	RAB35	Ras-related protein Rab-35 (GTP-binding protein RAY) (Ras-related protein Rab-1C)	83	19	240	0.408867	0.372549	0.036318	0.134201	0	296
7157	P48643	22948	CCT5	TCPE	T-complex protein 1 subunit epsilon (TCP-1-epsilon) (CCT-epsilon)	89	24	240	0.438424	0.470588	-0.0321646	-0.10214	63	462
3990	P15880	6187	RPS2	RS2	40S ribosomal protein S2 (40S ribosomal protein S4) (Protein LLRep3) (Small ribosomal subunit protein uS5)	97	18	239	0.477833	0.352941	0.124891	0.437077	51	305
4027	P62249	6217	RPS16	RS16	40S ribosomal protein S16 (Small ribosomal subunit protein uS9)	83	18	239	0.408867	0.352941	0.0559258	0.212204	36	306
4227	P11166	6513	SLC2A1	GTR1	Solute carrier family 2, facilitated glucose transporter member 1 (Glucose transporter type 1, erythrocyte/brain) (GLUT-1) (HepG2 glucose transporter)	102	19	239	0.502463	0.372549	0.129914	0.431587	6	370
316	P52565	396	ARHGDIA	GDIR1	Rho GDP-dissociation inhibitor 1 (Rho GDI 1) (Rho-GDI alpha)	95	16	238	0.46798	0.313725	0.154255	0.576945	0	360
3152	P30086	5037	PEBP1	PEBP1	Phosphatidylethanolamine-binding protein 1 (PEBP-1) (HCNPpp) (Neuropolypeptide h3) (Prostatic-binding protein) (Raf kinase inhibitor protein) (RKIP) [Cleaved into: Hippocampal cholinergic neurostimulating peptide (HCNP)]	96	20	238	0.472906	0.392157	0.0807495	0.270124	3	301
4724	P49368	7203	CCT3	TCPG	T-complex protein 1 subunit gamma (TCP-1-gamma) (CCT-gamma) (hTRiC5)	88	22	238	0.433498	0.431373	0.00212499	0.00708942	63	462
6209	P61160	10097	ACTR2	ARP2	Actin-related protein 2 (Actin-like protein 2)	80	20	237	0.394089	0.392157	0.00193181	0.00708942	0	592
6652	Q14344	10672	GNA13	GNA13	Guanine nucleotide-binding protein subunit alpha-13 (G alpha-13) (G-protein subunit alpha-13)	99	21	237	0.487685	0.411765	0.07592	0.244129	0	444
353	P31939	471	ATIC	PUR9	Bifunctional purine biosynthesis protein PURH [Cleaved into: Bifunctional purine biosynthesis protein PURH, N-terminally processed] [Includes: Phosphoribosylaminoimidazolecarboxamide formyltransferase (EC 2.1.2.3) (5-aminoimidazole-4-carboxamide ribonucleotide formyltransferase) (AICAR transformylase); IMP cyclohydrolase (EC 3.5.4.10) (ATIC) (IMP synthase) (Inosinicase)]	100	18	235	0.492611	0.352941	0.13967	0.481021	11	302
3613	P25788	5684	PSMA3	PSA3	Proteasome subunit alpha type-3 (EC 3.4.25.1) (Macropain subunit C8) (Multicatalytic endopeptidase complex subunit C8) (Proteasome component C8)	82	13	232	0.403941	0.254902	0.149039	0.664202	0	283
2911	O00159	4641	MYO1C	MYO1C	Unconventional myosin-Ic (Myosin I beta) (MMI-beta) (MMIb)	104	14	230	0.512315	0.27451	0.237805	0.900174	0	508
3611	P25787	5683	PSMA2	PSA2	Proteasome subunit alpha type-2 (EC 3.4.25.1) (Macropain subunit C3) (Multicatalytic endopeptidase complex subunit C3) (Proteasome component C3)	74	18	230	0.364532	0.352941	0.0115908	0.0466178	0	286
3996	P62701	6191	RPS4X	RS4X	40S ribosomal protein S4, X isoform (SCR10) (Single copy abundant mRNA protein) (Small ribosomal subunit protein eS4)	87	18	230	0.428571	0.352941	0.0756303	0.280108	0	323
6423	P63244	10399	RACK1	RACK1	Receptor of activated protein C kinase 1 (Cell proliferation-inducing gene 21 protein) (Guanine nucleotide-binding protein subunit beta-2-like 1) (Guanine nucleotide-binding protein subunit beta-like protein 12.3) (Human lung cancer oncogene 7 protein) (HLC-7) (Receptor for activated C kinase) (Small ribosomal subunit protein RACK1) [Cleaved into: Receptor of activated protein C kinase 1, N-termi…	82	19	230	0.403941	0.372549	0.0313919	0.116714	0	314
12792	Q562R1	345651	ACTBL2	ACTBL	Beta-actin-like protein 2 (Kappa-actin)	73	18	230	0.359606	0.352941	0.00666473	0.026989	0	592
3610	P25786	5682	PSMA1	PSA1	Proteasome subunit alpha type-1 (EC 3.4.25.1) (30 kDa prosomal protein) (PROS-30) (Macropain subunit C2) (Multicatalytic endopeptidase complex subunit C2) (Proteasome component C2) (Proteasome nu chain)	83	14	229	0.408867	0.27451	0.134357	0.574774	1	371
2533	P11279	3916	LAMP1	LAMP1	Lysosome-associated membrane glycoprotein 1 (LAMP-1) (Lysosome-associated membrane protein 1) (CD107 antigen-like family member A) (CD antigen CD107a)	93	20	228	0.458128	0.392157	0.0659712	0.22432	0	328
3627	P49720	5691	PSMB3	PSB3	Proteasome subunit beta type-3 (EC 3.4.25.1) (Proteasome chain 13) (Proteasome component C10-II) (Proteasome theta chain)	68	18	228	0.334975	0.352941	-0.0179658	-0.0753727	0	284
4079	P31949	6282	S100A11	S10AB	Protein S100-A11 (Calgizzarin) (Metastatic lymph node gene 70 protein) (MLN 70) (Protein S100-C) (S100 calcium-binding protein A11) [Cleaved into: Protein S100-A11, N-terminally processed]	84	16	228	0.413793	0.313725	0.100068	0.399407	0	266
396	P38606	523	ATP6V1A	VATA	V-type proton ATPase catalytic subunit A (V-ATPase subunit A) (EC 3.6.3.14) (V-ATPase 69 kDa subunit) (Vacuolar ATPase isoform VA68) (Vacuolar proton pump subunit alpha)	98	17	227	0.482759	0.333333	0.149425	0.534336	3	289
1561	O75369	2317	FLNB	FLNB	Filamin-B (FLN-B) (ABP-278) (ABP-280 homolog) (Actin-binding-like protein) (Beta-filamin) (Filamin homolog 1) (Fh1) (Filamin-3) (Thyroid autoantigen) (Truncated actin-binding protein) (Truncated ABP)	86	21	227	0.423645	0.411765	0.0118806	0.0410368	0	536
2401	P14923	3728	JUP	PLAK	Junction plakoglobin (Catenin gamma) (Desmoplakin III) (Desmoplakin-3)	100	19	227	0.492611	0.372549	0.120062	0.403018	9	328
3936	P30050	6136	RPL12	RL12	60S ribosomal protein L12 (Large ribosomal subunit protein uL11)	77	16	227	0.37931	0.313725	0.0655849	0.273876	23	278
290	P18085	378	ARF4	ARF4	ADP-ribosylation factor 4	84	16	226	0.413793	0.313725	0.100068	0.399407	0	533
295	P62330	382	ARF6	ARF6	ADP-ribosylation factor 6	91	20	226	0.448276	0.392157	0.056119	0.192956	0	292
2197	P10809	3329	HSPD1	CH60	60 kDa heat shock protein, mitochondrial (EC 3.6.4.9) (60 kDa chaperonin) (Chaperonin 60) (CPN60) (Heat shock protein 60) (HSP-60) (Hsp60) (HuCHA60) (Mitochondrial matrix protein P1) (P60 lymphocyte protein)	68	30	226	0.334975	0.588235	-0.25326	-0.812338	63	462
3625	P20618	5689	PSMB1	PSB1	Proteasome subunit beta type-1 (EC 3.4.25.1) (Macropain subunit C5) (Multicatalytic endopeptidase complex subunit C5) (Proteasome component C5) (Proteasome gamma chain)	72	17	226	0.35468	0.333333	0.0213465	0.0895516	1	371
7873	O43175	26227	PHGDH	SERA	D-3-phosphoglycerate dehydrogenase (3-PGDH) (EC 1.1.1.95) (2-oxoglutarate reductase) (EC 1.1.1.399) (Malate dehydrogenase) (EC 1.1.1.37)	98	22	226	0.482759	0.431373	0.0513861	0.162368	20	296
9471	Q86VP6	55832	CAND1	CAND1	Cullin-associated NEDD8-dissociated protein 1 (Cullin-associated and neddylation-dissociated protein 1) (TBP-interacting protein of 120 kDa A) (TBP-interacting protein 120A) (p120 CAND1)	86	19	226	0.423645	0.372549	0.0510963	0.185427	0	283
11416	Q969P0	93185	IGSF8	IGSF8	Immunoglobulin superfamily member 8 (IgSF8) (CD81 partner 3) (Glu-Trp-Ile EWI motif-containing protein 2) (EWI-2) (Keratinocytes-associated transmembrane protein 4) (KCT-4) (LIR-D1) (Prostaglandin regulatory-like protein) (PGRL) (CD antigen CD316)	95	12	226	0.46798	0.235294	0.232686	0.991983	0	265
586	P27797	811	CALR	CALR	Calreticulin (CRP55) (Calregulin) (Endoplasmic reticulum resident protein 60) (ERp60) (HACBP) (grp60)	80	24	225	0.394089	0.470588	-0.0764996	-0.255945	0	283
3651	Q13200	5708	PSMD2	PSMD2	26S proteasome non-ATPase regulatory subunit 2 (26S proteasome regulatory subunit RPN1) (26S proteasome regulatory subunit S2) (26S proteasome subunit p97) (Protein 55.11) (Tumor necrosis factor type 1 receptor-associated protein 2)	87	19	225	0.428571	0.372549	0.0560224	0.202105	0	307
1211	Q14204	1778	DYNC1H1	DYHC1	Cytoplasmic dynein 1 heavy chain 1 (Cytoplasmic dynein heavy chain 1) (Dynein heavy chain, cytosolic)	97	13	224	0.477833	0.254902	0.222931	0.906563	0	340
3982	P05388	6175	RPLP0	RLA0	60S acidic ribosomal protein P0 (60S ribosomal protein L10E) (Large ribosomal subunit protein uL10)	74	22	224	0.364532	0.431373	-0.0668405	-0.242889	30	332
6596	P22234	10606	PAICS	PUR6	Multifunctional protein ADE2 [Includes: Phosphoribosylaminoimidazole-succinocarboxamide synthase (EC 6.3.2.6) (SAICAR synthetase); Phosphoribosylaminoimidazole carboxylase (EC 4.1.1.21) (AIR carboxylase) (AIRC)]	72	25	224	0.35468	0.490196	-0.135516	-0.466842	8	271
7318	Q7L576	23191	CYFIP1	CYFP1	Cytoplasmic FMR1-interacting protein 1 (Specifically Rac1-associated protein 1) (Sra-1) (p140sra-1)	93	14	224	0.458128	0.27451	0.183618	0.738893	0	283
3068	P06748	4869	NPM1	NPM	Nucleophosmin (NPM) (Nucleolar phosphoprotein B23) (Nucleolar protein NO38) (Numatrin)	79	16	223	0.389163	0.313725	0.0754371	0.31087	0	261
3478	P30153	5518	PPP2R1A	2AAA	Serine/threonine-protein phosphatase 2A 65 kDa regulatory subunit A alpha isoform (Medium tumor antigen-associated 61 kDa protein) (PP2A subunit A isoform PR65-alpha) (PP2A subunit A isoform R1-alpha)	83	18	223	0.408867	0.352941	0.0559258	0.212204	0	300
4884	P04004	7448	VTN	VTNC	Vitronectin (VN) (S-protein) (Serum-spreading factor) (V75) [Cleaved into: Vitronectin V65 subunit; Vitronectin V10 subunit; Somatomedin-B]	107	18	223	0.527094	0.352941	0.174152	0.578631	0	424
5262	Q9Y265	8607	RUVBL1	RUVB1	RuvB-like 1 (EC 3.6.4.12) (49 kDa TATA box-binding protein-interacting protein) (49 kDa TBP-interacting protein) (54 kDa erythrocyte cytosolic protein) (ECP-54) (INO80 complex subunit H) (Nuclear matrix protein 238) (NMP 238) (Pontin 52) (TIP49a) (TIP60-associated protein 54-alpha) (TAP54-alpha)	78	18	223	0.384236	0.352941	0.0312953	0.122567	0	294
5472	O75131	8895	CPNE3	CPNE3	Copine-3 (Copine III)	94	15	223	0.463054	0.294118	0.168937	0.654788	0	328
2335	P23229	3655	ITGA6	ITA6	Integrin alpha-6 (CD49 antigen-like family member F) (VLA-6) (CD antigen CD49f) [Cleaved into: Integrin alpha-6 heavy chain; Integrin alpha-6 light chain; Processed integrin alpha-6 (Alpha6p)]	87	15	222	0.428571	0.294118	0.134454	0.543142	0	246
3942	Q07020	6141	RPL18	RL18	60S ribosomal protein L18 (Large ribosomal subunit protein eL18)	87	19	222	0.428571	0.372549	0.0560224	0.202105	0	300
3985	P05387	6181	RPLP2	RLA2	60S acidic ribosomal protein P2 (Large ribosomal subunit protein P2) (Renal carcinoma antigen NY-REN-44)	75	13	222	0.369458	0.254902	0.114556	0.535468	0	296
2360	P06756	3685	ITGAV	ITAV	Integrin alpha-V (Vitronectin receptor subunit alpha) (CD antigen CD51) [Cleaved into: Integrin alpha-V heavy chain; Integrin alpha-V light chain]	92	15	221	0.453202	0.294118	0.159084	0.623761	0	245
3620	P60900	5687	PSMA6	PSA6	Proteasome subunit alpha type-6 (EC 3.4.25.1) (27 kDa prosomal protein) (PROS-27) (p27K) (Macropain iota chain) (Multicatalytic endopeptidase complex iota chain) (Proteasome iota chain)	73	21	221	0.359606	0.411765	-0.0521588	-0.195403	0	309
4739	Q99816	7251	TSG101	TS101	Tumor susceptibility gene 101 protein (ESCRT-I complex subunit TSG101)	97	9	221	0.477833	0.176471	0.301362	1.43708	0	273
6232	Q15084	10130	PDIA6	PDIA6	Protein disulfide-isomerase A6 (EC 5.3.4.1) (Endoplasmic reticulum protein 5) (ER protein 5) (ERp5) (Protein disulfide isomerase P5) (Thioredoxin domain-containing protein 7)	71	26	221	0.349754	0.509804	-0.16005	-0.543603	41	438
7320	Q14697	23193	GANAB	GANAB	Neutral alpha-glucosidase AB (EC 3.2.1.84) (Alpha-glucosidase 2) (Glucosidase II subunit alpha)	77	22	221	0.37931	0.431373	-0.0520622	-0.185556	4	323
3927	P62424	6130	RPL7A	RL7A	60S ribosomal protein L7a (Large ribosomal subunit protein eL8) (PLA-X polypeptide) (Surfeit locus protein 3)	79	20	220	0.389163	0.392157	-0.0029943	-0.0110579	0	304
3994	P61247	6189	RPS3A	RS3A	40S ribosomal protein S3a (Small ribosomal subunit protein eS1) (v-fos transformation effector protein) (Fte-1)	81	16	220	0.399015	0.313725	0.0852893	0.346939	0	299
6219	O15144	10109	ARPC2	ARPC2	Actin-related protein 2/3 complex subunit 2 (Arp2/3 complex 34 kDa subunit) (p34-ARC)	74	19	220	0.364532	0.372549	-0.008017	-0.0313847	0	279
2854	P11586	4522	MTHFD1	C1TC	C-1-tetrahydrofolate synthase, cytoplasmic (C1-THF synthase) [Cleaved into: C-1-tetrahydrofolate synthase, cytoplasmic, N-terminally processed] [Includes: Methylenetetrahydrofolate dehydrogenase (EC 1.5.1.5); Methenyltetrahydrofolate cyclohydrolase (EC 3.5.4.9); Formyltetrahydrofolate synthetase (EC 6.3.4.3)]	89	21	219	0.438424	0.411765	0.0266589	0.0905054	5	283
3919	P36578	6124	RPL4	RL4	60S ribosomal protein L4 (60S ribosomal protein L1) (Large ribosomal subunit protein uL4)	92	16	219	0.453202	0.313725	0.139476	0.530651	33	287
1566	Q14254	2319	FLOT2	FLOT2	Flotillin-2 (Epidermal surface antigen) (ESA) (Membrane component chromosome 17 surface marker 1)	85	16	218	0.418719	0.313725	0.104994	0.41648	10	340
2724	P40926	4191	MDH2	MDHM	Malate dehydrogenase, mitochondrial (EC 1.1.1.37)	70	23	218	0.344828	0.45098	-0.106153	-0.38719	23	530
3630	P28074	5693	PSMB5	PSB5	Proteasome subunit beta type-5 (EC 3.4.25.1) (Macropain epsilon chain) (Multicatalytic endopeptidase complex epsilon chain) (Proteasome chain 6) (Proteasome epsilon chain) (Proteasome subunit MB1) (Proteasome subunit X)	80	11	218	0.394089	0.215686	0.178402	0.869586	0	287
994	P55060	1434	CSE1L	XPO2	Exportin-2 (Exp2) (Cellular apoptosis susceptibility protein) (Chromosome segregation 1-like protein) (Importin-alpha re-exporter)	80	21	217	0.394089	0.411765	-0.017676	-0.0632999	0	266
2129	P61978	3190	HNRNPK	HNRPK	Heterogeneous nuclear ribonucleoprotein K (hnRNP K) (Transformation up-regulated nuclear protein) (TUNP)	74	17	217	0.364532	0.333333	0.0311987	0.12908	0	286
368	P54709	483	ATP1B3	AT1B3	Sodium/potassium-transporting ATPase subunit beta-3 (Sodium/potassium-dependent ATPase subunit beta-3) (ATPB-3) (CD antigen CD298)	96	15	216	0.472906	0.294118	0.178789	0.685161	0	329
1771	P31947	2810	SFN	1433S	14-3-3 protein sigma (Epithelial cell marker protein 1) (Stratifin)	85	12	216	0.418719	0.235294	0.183425	0.831518	0	553
2220	O75874	3417	IDH1	IDHC	Isocitrate dehydrogenase [NADP] cytoplasmic (IDH) (EC 1.1.1.42) (Cytosolic NADP-isocitrate dehydrogenase) (IDP) (NADP(+)-specific ICDH) (Oxalosuccinate decarboxylase)	90	14	216	0.44335	0.27451	0.16884	0.691588	20	317
3038	P15531	4830	NME1	NDKA	Nucleoside diphosphate kinase A (NDK A) (NDP kinase A) (EC 2.7.4.6) (Granzyme A-activated DNase) (GAAD) (Metastasis inhibition factor nm23) (NM23-H1) (Tumor metastatic process-associated protein)	70	19	216	0.344828	0.372549	-0.0277214	-0.111555	16	358
3184	Q15365	5093	PCBP1	PCBP1	Poly(rC)-binding protein 1 (Alpha-CP1) (Heterogeneous nuclear ribonucleoprotein E1) (hnRNP E1) (Nucleic acid-binding protein SUB2.3)	81	16	216	0.399015	0.313725	0.0852893	0.346939	0	293
3682	Q9P2B2	5738	PTGFRN	FPRP	Prostaglandin F2 receptor negative regulator (CD9 partner 1) (CD9P-1) (Glu-Trp-Ile EWI motif-containing protein F) (EWI-F) (Prostaglandin F2-alpha receptor regulatory protein) (Prostaglandin F2-alpha receptor-associated protein) (CD antigen CD315)	93	10	215	0.458128	0.196078	0.26205	1.22432	0	247
2177	P34932	3308	HSPA4	HSP74	Heat shock 70 kDa protein 4 (HSP70RY) (Heat shock 70-related protein APG-2)	76	19	214	0.374384	0.372549	0.00183522	0.00708942	40	568
7753	Q9Y696	25932	CLIC4	CLIC4	Chloride intracellular channel protein 4 (Intracellular chloride ion channel protein p64H1)	88	18	214	0.433498	0.352941	0.0805564	0.296596	0	282
1607	P11413	2539	G6PD	G6PD	Glucose-6-phosphate 1-dehydrogenase (G6PD) (EC 1.1.1.49)	70	17	213	0.344828	0.333333	0.0114943	0.0489096	7	269
3040	P22392	4831	NME2	NDKB	Nucleoside diphosphate kinase B (NDK B) (NDP kinase B) (EC 2.7.4.6) (C-myc purine-binding transcription factor PUF) (Histidine protein kinase NDKB) (EC 2.7.13.3) (nm23-H2)	83	17	213	0.408867	0.333333	0.0755337	0.294666	16	358
7032	Q99497	11315	PARK7	PARK7	Protein DJ-1 (DJ-1) (Oncogene DJ1) (Parkinson disease protein 7) (Parkinsonism-associated deglycase) (Protein deglycase DJ-1) (EC 3.1.2.-) (EC 3.5.1.124)	84	15	213	0.413793	0.294118	0.119675	0.492516	10	252
1940	P68871	3043	HBB	HBB	Hemoglobin subunit beta (Beta-globin) (Hemoglobin beta chain) [Cleaved into: LVV-hemorphin-7; Spinorphin]	107	17	212	0.527094	0.333333	0.19376	0.661094	3	444
5662	Q15907	9230	RAB11B	RB11B	Ras-related protein Rab-11B (GTP-binding protein YPT3)	80	18	212	0.394089	0.352941	0.0411475	0.159093	0	533
3614	P25789	5685	PSMA4	PSA4	Proteasome subunit alpha type-4 (EC 3.4.25.1) (Macropain subunit C9) (Multicatalytic endopeptidase complex subunit C9) (Proteasome component C9) (Proteasome subunit L)	61	16	211	0.300493	0.313725	-0.0132329	-0.0621732	1	371
3810	P62834	5906	RAP1A	RAP1A	Ras-related protein Rap-1A (C21KG) (G-22K) (GTP-binding protein smg p21A) (Ras-related protein Krev-1)	82	13	211	0.403941	0.254902	0.149039	0.664202	0	533
9408	Q96QK1	55737	VPS35	VPS35	Vacuolar protein sorting-associated protein 35 (hVPS35) (Maternal-embryonic 3) (Vesicle protein sorting 35)	74	26	211	0.364532	0.509804	-0.145272	-0.483897	0	263
2773	P14174	4282	MIF	MIF	Macrophage migration inhibitory factor (MIF) (EC 5.3.2.1) (Glycosylation-inhibiting factor) (GIF) (L-dopachrome isomerase) (L-dopachrome tautomerase) (EC 5.3.3.12) (Phenylpyruvate tautomerase)	84	18	210	0.413793	0.352941	0.0608519	0.229482	0	269
2996	Q15019	4735	SEPTIN2	SEPT2	Septin-2 (Neural precursor cell expressed developmentally down-regulated protein 5) (NEDD-5)	68	16	210	0.334975	0.313725	0.0212499	0.0945523	0	317
58	P63261	71	ACTG1	ACTG	Actin, cytoplasmic 2 (Gamma-actin) [Cleaved into: Actin, cytoplasmic 2, N-terminally processed]	70	13	209	0.344828	0.254902	0.0899256	0.435933	0	592
257	P04114	338	APOB	APOB	Apolipoprotein B-100 (Apo B-100) [Cleaved into: Apolipoprotein B-48 (Apo B-48)]	83	17	209	0.408867	0.333333	0.0755337	0.294666	0	257
1647	P41250	2617	GARS1	GARS	Glycine--tRNA ligase (EC 3.6.1.17) (EC 6.1.1.14) (Diadenosine tetraphosphate synthetase) (AP-4-A synthetase) (Glycyl-tRNA synthetase) (GlyRS)	73	19	209	0.359606	0.372549	-0.0129431	-0.0510135	3	267
6023	P53990	9798	IST1	IST1	IST1 homolog (hIST1) (Putative MAPK-activating protein PM28)	95	10	209	0.46798	0.196078	0.271902	1.25502	0	253
7696	P30044	25824	PRDX5	PRDX5	Peroxiredoxin-5, mitochondrial (EC 1.11.1.15) (Alu corepressor 1) (Antioxidant enzyme B166) (AOEB166) (Liver tissue 2D-page spot 71B) (PLP) (Peroxiredoxin V) (Prx-V) (Peroxisomal antioxidant enzyme) (TPx type VI) (Thioredoxin peroxidase PMP20) (Thioredoxin reductase)	78	17	209	0.384236	0.333333	0.0509031	0.205029	3	253
10316	Q09666	79026	AHNAK	AHNK	Neuroblast differentiation-associated protein AHNAK (Desmoyokin)	80	18	209	0.394089	0.352941	0.0411475	0.159093	0	216
380	P25705	498	ATP5F1A	ATPA	ATP synthase subunit alpha, mitochondrial	69	26	208	0.339901	0.509804	-0.169902	-0.584826	45	279
1252	P15924	1832	DSP	DESP	Desmoplakin (DP) (250/210 kDa paraneoplastic pemphigus antigen)	74	15	208	0.364532	0.294118	0.0704144	0.309652	0	236
3626	P49721	5690	PSMB2	PSB2	Proteasome subunit beta type-2 (EC 3.4.25.1) (Macropain subunit C7-I) (Multicatalytic endopeptidase complex subunit C7-I) (Proteasome component C7-I)	65	14	208	0.320197	0.27451	0.0456872	0.222102	1	371
3898	P13489	6050	RNH1	RINI	Ribonuclease inhibitor (Placental ribonuclease inhibitor) (Placental RNase inhibitor) (Ribonuclease/angiogenin inhibitor 1) (RAI)	70	18	208	0.344828	0.352941	-0.00811359	-0.0335526	0	261
4001	P62753	6194	RPS6	RS6	40S ribosomal protein S6 (Phosphoprotein NP33) (Small ribosomal subunit protein eS6)	85	11	208	0.418719	0.215686	0.203033	0.957049	0	280
4989	Q71U36	7846	TUBA1A	TBA1A	Tubulin alpha-1A chain (Alpha-tubulin 3) (Tubulin B-alpha-1) (Tubulin alpha-3 chain) [Cleaved into: Detyrosinated tubulin alpha-1A chain]	68	14	208	0.334975	0.27451	0.0604656	0.287197	0	544
80	O14672	102	ADAM10	ADA10	Disintegrin and metalloproteinase domain-containing protein 10 (ADAM 10) (EC 3.4.24.81) (CDw156) (Kuzbanian protein homolog) (Mammalian disintegrin-metalloprotease) (CD antigen CD156c)	86	12	207	0.423645	0.235294	0.188351	0.848392	0	273
653	P16152	873	CBR1	CBR1	Carbonyl reductase [NADPH] 1 (EC 1.1.1.184) (15-hydroxyprostaglandin dehydrogenase [NADP(+)]) (EC 1.1.1.197) (NADPH-dependent carbonyl reductase 1) (Prostaglandin 9-ketoreductase) (Prostaglandin-E(2) 9-reductase) (EC 1.1.1.189) (Short chain dehydrogenase/reductase family 21C member 1)	87	14	207	0.428571	0.27451	0.154062	0.642678	9	300
2656	P29966	4082	MARCKS	MARCS	Myristoylated alanine-rich C-kinase substrate (MARCKS) (Protein kinase C substrate, 80 kDa protein, light chain) (80K-L protein) (PKCSL)	98	12	207	0.482759	0.235294	0.247465	1.03684	0	259
3273	Q01813	5214	PFKP	PFKAP	ATP-dependent 6-phosphofructokinase, platelet type (ATP-PFK) (PFK-P) (EC 2.7.1.11) (6-phosphofructokinase type C) (Phosphofructo-1-kinase isozyme C) (PFK-C) (Phosphohexokinase)	72	18	207	0.35468	0.352941	0.00173863	0.00708942	15	296
4018	P62263	6208	RPS14	RS14	40S ribosomal protein S14 (Small ribosomal subunit protein uS11)	59	19	207	0.29064	0.372549	-0.0819086	-0.358195	32	258
4708	P67936	7171	TPM4	TPM4	Tropomyosin alpha-4 chain (TM30p1) (Tropomyosin-4)	63	20	207	0.310345	0.392157	-0.081812	-0.337559	0	321
6745	Q9Y230	10856	RUVBL2	RUVB2	RuvB-like 2 (EC 3.6.4.12) (48 kDa TATA box-binding protein-interacting protein) (48 kDa TBP-interacting protein) (51 kDa erythrocyte cytosolic protein) (ECP-51) (INO80 complex subunit J) (Repressing pontin 52) (Reptin 52) (TIP49b) (TIP60-associated protein 54-beta) (TAP54-beta)	78	16	207	0.384236	0.313725	0.070511	0.292492	0	294
12882	O00468	375790	AGRN	AGRIN	Agrin [Cleaved into: Agrin N-terminal 110 kDa subunit; Agrin C-terminal 110 kDa subunit; Agrin C-terminal 90 kDa fragment (C90); Agrin C-terminal 22 kDa fragment (C22)]	84	8	207	0.413793	0.156863	0.25693	1.39941	0	242
927	P53621	1314	COPA	COPA	Coatomer subunit alpha (Alpha-coat protein) (Alpha-COP) (HEP-COP) (HEPCOP) [Cleaved into: Xenin (Xenopsin-related peptide); Proxenin]	69	17	206	0.339901	0.333333	0.00656814	0.028151	0	252
1590	P02794	2495	FTH1	FRIH	Ferritin heavy chain (Ferritin H subunit) (EC 1.16.3.1) (Cell proliferation-inducing gene 15 protein) [Cleaved into: Ferritin heavy chain, N-terminally processed]	80	11	206	0.394089	0.215686	0.178402	0.869586	13	283
2169	P31689	3301	DNAJA1	DNJA1	DnaJ homolog subfamily A member 1 (DnaJ protein homolog 2) (HSDJ) (Heat shock 40 kDa protein 4) (Heat shock protein J2) (HSJ-2) (Human DnaJ protein 2) (hDj-2)	84	14	206	0.413793	0.27451	0.139283	0.592052	8	327
3922	P46777	6125	RPL5	RL5	60S ribosomal protein L5 (Large ribosomal subunit protein uL18)	79	12	206	0.389163	0.235294	0.153868	0.725908	38	282
1293	P29692	1936	EEF1D	EF1D	Elongation factor 1-delta (EF-1-delta) (Antigen NY-CO-4)	68	16	205	0.334975	0.313725	0.0212499	0.0945523	0	283
5061	Q01650	8140	SLC7A5	LAT1	Large neutral amino acids transporter small subunit 1 (4F2 light chain) (4F2 LC) (4F2LC) (CD98 light chain) (Integral membrane protein E16) (L-type amino acid transporter 1) (hLAT1) (Solute carrier family 7 member 5) (y+ system cationic amino acid transporter)	84	16	205	0.413793	0.313725	0.100068	0.399407	7	343
5381	P54920	8775	NAPA	SNAA	Alpha-soluble NSF attachment protein (SNAP-alpha) (N-ethylmaleimide-sensitive factor attachment protein alpha)	76	13	205	0.374384	0.254902	0.119482	0.554577	0	266
6429	P80723	10409	BASP1	BASP1	Brain acid soluble protein 1 (22 kDa neuronal tissue-enriched acidic protein) (Neuronal axonal membrane protein NAP-22)	88	16	205	0.433498	0.313725	0.119772	0.466521	0	235
1048	P35221	1495	CTNNA1	CTNA1	Catenin alpha-1 (Alpha E-catenin) (Cadherin-associated protein) (Renal carcinoma antigen NY-REN-13)	87	17	204	0.428571	0.333333	0.0952381	0.36257	0	387
2562	P09382	3956	LGALS1	LEG1	Galectin-1 (Gal-1) (14 kDa laminin-binding protein) (HLBP14) (14 kDa lectin) (Beta-galactoside-binding lectin L-14-I) (Galaptin) (HBL) (HPL) (Lactose-binding lectin 1) (Lectin galactoside-binding soluble 1) (Putative MAPK-activating protein PM12) (S-Lac lectin 1)	68	14	204	0.334975	0.27451	0.0604656	0.287197	0	358
3077	P01111	4893	NRAS	RASN	GTPase NRas (Transforming protein N-Ras)	77	14	204	0.37931	0.27451	0.104801	0.466521	0	533
3375	Q15149	5339	PLEC	PLEC	Plectin (PCN) (PLTN) (Hemidesmosomal protein 1) (HD1) (Plectin-1)	66	20	204	0.325123	0.392157	-0.0670337	-0.270445	0	536
3631	P28072	5694	PSMB6	PSB6	Proteasome subunit beta type-6 (EC 3.4.25.1) (Macropain delta chain) (Multicatalytic endopeptidase complex delta chain) (Proteasome delta chain) (Proteasome subunit Y)	71	14	204	0.349754	0.27451	0.0752439	0.349482	0	275
3772	P61020	5869	RAB5B	RAB5B	Ras-related protein Rab-5B	82	14	204	0.403941	0.27451	0.129431	0.557287	0	394
3924	Q02878	6128	RPL6	RL6	60S ribosomal protein L6 (Large ribosomal subunit protein eL6) (Neoplasm-related protein C140) (Tax-responsive enhancer element-binding protein 107) (TaxREB107)	80	15	204	0.394089	0.294118	0.099971	0.422127	0	345
5377	O00161	8773	SNAP23	SNP23	Synaptosomal-associated protein 23 (SNAP-23) (Vesicle-membrane fusion protein SNAP-23)	78	14	204	0.384236	0.27451	0.109727	0.485137	0	255
8285	Q9NTK5	29789	OLA1	OLA1	Obg-like ATPase 1 (DNA damage-regulated overexpressed in cancer 45) (DOC45) (GTP-binding protein 9)	74	16	204	0.364532	0.313725	0.0508065	0.216543	11	256
11792	Q9H444	128866	CHMP4B	CHM4B	Charged multivesicular body protein 4b (Chromatin-modifying protein 4b) (CHMP4b) (SNF7 homolog associated with Alix 1) (SNF7-2) (hSnf7-2) (Vacuolar protein sorting-associated protein 32-2) (Vps32-2) (hVps32-2)	84	9	204	0.413793	0.176471	0.237323	1.22948	0	249
624	P47756	832	CAPZB	CAPZB	F-actin-capping protein subunit beta (CapZ beta)	70	16	203	0.344828	0.313725	0.0311021	0.136372	0	286
1113	P14868	1615	DARS1	SYDC	Aspartate--tRNA ligase, cytoplasmic (EC 6.1.1.12) (Aspartyl-tRNA synthetase) (AspRS) (Cell proliferation-inducing gene 40 protein)	72	16	203	0.35468	0.313725	0.0409543	0.177014	19	284
3934	P62913	6135	RPL11	RL11	60S ribosomal protein L11 (CLL-associated antigen KW-12) (Large ribosomal subunit protein uL5)	75	16	203	0.369458	0.313725	0.0557326	0.235908	41	270
4011	P46781	6203	RPS9	RS9	40S ribosomal protein S9 (Small ribosomal subunit protein uS4)	79	15	203	0.389163	0.294118	0.0950449	0.40398	36	269
4013	P62280	6205	RPS11	RS11	40S ribosomal protein S11 (Small ribosomal subunit protein uS17)	65	14	203	0.320197	0.27451	0.0456872	0.222102	20	264
4595	Q15582	7045	TGFBI	BGH3	Transforming growth factor-beta-induced protein ig-h3 (Beta ig-h3) (Kerato-epithelin) (RGD-containing collagen-associated protein) (RGD-CAP)	66	14	203	0.325123	0.27451	0.0506133	0.244129	0	258
6202	O15145	10094	ARPC3	ARPC3	Actin-related protein 2/3 complex subunit 3 (Arp2/3 complex 21 kDa subunit) (p21-ARC)	73	17	203	0.359606	0.333333	0.0262726	0.109451	0	261
169	P09972	230	ALDOC	ALDOC	Fructose-bisphosphate aldolase C (EC 4.1.2.13) (Brain-type aldolase)	76	20	202	0.374384	0.392157	-0.0177726	-0.0669112	2	484
307	P84095	391	RHOG	RHOG	Rho-related GTP-binding protein RhoG	77	15	202	0.37931	0.294118	0.0851927	0.366985	0	533
366	P05026	481	ATP1B1	AT1B1	Sodium/potassium-transporting ATPase subunit beta-1 (Sodium/potassium-dependent ATPase subunit beta-1)	89	14	202	0.438424	0.27451	0.163914	0.675468	0	329
119	P63010	163	AP2B1	AP2B1	AP-2 complex subunit beta (AP105B) (Adaptor protein complex AP-2 subunit beta) (Adaptor-related protein complex 2 subunit beta) (Beta-2-adaptin) (Beta-adaptin) (Clathrin assembly protein complex 2 beta large chain) (Plasma membrane adaptor HA2/AP2 adaptin beta subunit)	68	15	201	0.334975	0.294118	0.0408577	0.187662	0	318
3664	O00231	5717	PSMD11	PSD11	26S proteasome non-ATPase regulatory subunit 11 (26S proteasome regulatory subunit RPN6) (26S proteasome regulatory subunit S9) (26S proteasome regulatory subunit p44.5)	66	14	201	0.325123	0.27451	0.0506133	0.244129	0	265
4042	P62851	6230	RPS25	RS25	40S ribosomal protein S25 (Small ribosomal subunit protein eS25)	71	13	201	0.349754	0.254902	0.0948517	0.456397	0	243
4075	P05109	6279	S100A8	S10A8	Protein S100-A8 (Calgranulin-A) (Calprotectin L1L subunit) (Cystic fibrosis antigen) (CFAG) (Leukocyte L1 complex light chain) (Migration inhibitory factor-related protein 8) (MRP-8) (p8) (S100 calcium-binding protein A8) (Urinary stone protein band A) [Cleaved into: Protein S100-A8, N-terminally processed]	75	11	201	0.369458	0.215686	0.153772	0.776476	0	219
5540	P50914	9045	RPL14	RL14	60S ribosomal protein L14 (CAG-ISL 7) (Large ribosomal subunit protein eL14)	71	11	201	0.349754	0.215686	0.134067	0.697405	0	345
5871	O75367	9555	MACROH2A1	H2AY	Core histone macro-H2A.1 (Histone macroH2A1) (mH2A1) (Histone H2A.y) (H2A/y) (Medulloblastoma antigen MU-MB-50.205)	70	12	201	0.344828	0.235294	0.109533	0.55141	0	452
7938	P11940	26986	PABPC1	PABP1	Polyadenylate-binding protein 1 (PABP-1) (Poly(A)-binding protein 1)	69	13	201	0.339901	0.254902	0.0849995	0.415174	0	275
8785	Q92930	51762	RAB8B	RAB8B	Ras-related protein Rab-8B	84	18	201	0.413793	0.352941	0.0608519	0.229482	0	410
2530	P11047	3915	LAMC1	LAMC1	Laminin subunit gamma-1 (Laminin B2 chain) (Laminin-1 subunit gamma) (Laminin-10 subunit gamma) (Laminin-11 subunit gamma) (Laminin-2 subunit gamma) (Laminin-3 subunit gamma) (Laminin-4 subunit gamma) (Laminin-6 subunit gamma) (Laminin-7 subunit gamma) (Laminin-8 subunit gamma) (Laminin-9 subunit gamma) (S-laminin subunit gamma) (S-LAM gamma)	81	11	200	0.399015	0.215686	0.183329	0.887508	0	286
4887	P23381	7453	WARS1	SYWC	Tryptophan--tRNA ligase, cytoplasmic (EC 6.1.1.2) (Interferon-induced protein 53) (IFP53) (Tryptophanyl-tRNA synthetase) (TrpRS) (hWRS) [Cleaved into: T1-TrpRS; T2-TrpRS]	71	12	200	0.349754	0.235294	0.11446	0.571874	7	237
6829	P31948	10963	STIP1	STIP1	Stress-induced-phosphoprotein 1 (STI1) (Hsc70/Hsp90-organizing protein) (Hop) (Renal carcinoma antigen NY-REN-11) (Transformation-sensitive protein IEF SSP 3521)	72	17	200	0.35468	0.333333	0.0213465	0.0895516	0	261
1232	Q16555	1808	DPYSL2	DPYL2	Dihydropyrimidinase-related protein 2 (DRP-2) (Collapsin response mediator protein 2) (CRMP-2) (N2A3) (Unc-33-like phosphoprotein 2) (ULIP-2)	64	23	199	0.315271	0.45098	-0.135709	-0.516473	14	288
3089	P21589	4907	NT5E	5NTD	5'-nucleotidase (5'-NT) (EC 3.1.3.5) (Ecto-5'-nucleotidase) (CD antigen CD73)	74	18	199	0.364532	0.352941	0.0115908	0.0466178	18	227
3917	P39023	6122	RPL3	RL3	60S ribosomal protein L3 (HIV-1 TAR RNA-binding protein B) (TARBP-B) (Large ribosomal subunit protein uL3)	79	11	199	0.389163	0.215686	0.173476	0.851439	31	262
4046	P62979	6233	RPS27A	RS27A	Ubiquitin-40S ribosomal protein S27a (Ubiquitin carboxyl extension protein 80) [Cleaved into: Ubiquitin; 40S ribosomal protein S27a (Small ribosomal subunit protein eS31)]	64	12	199	0.315271	0.235294	0.0799768	0.422127	0	468
6880	P60981	11034	DSTN	DEST	Destrin (Actin-depolymerizing factor) (ADF)	80	14	199	0.394089	0.27451	0.119579	0.521663	0	470
57	P68032	70	ACTC1	ACTC	Actin, alpha cardiac muscle 1 (Alpha-cardiac actin)	69	14	198	0.339901	0.27451	0.0653917	0.308259	0	592
269	P07741	353	APRT	APT	Adenine phosphoribosyltransferase (APRT) (EC 2.4.2.7)	64	17	198	0.315271	0.333333	-0.0180624	-0.0803734	8	243
904	P12109	1291	COL6A1	CO6A1	Collagen alpha-1(VI) chain	95	8	198	0.46798	0.156863	0.311118	1.57695	0	241
4526	P26639	6897	TARS1	SYTC	Threonine--tRNA ligase, cytoplasmic (EC 6.1.1.3) (Threonyl-tRNA synthetase) (ThrRS)	67	21	198	0.330049	0.411765	-0.0817154	-0.319139	23	256
4704	P06753	7170	TPM3	TPM3	Tropomyosin alpha-3 chain (Gamma-tropomyosin) (Tropomyosin-3) (Tropomyosin-5) (hTM5)	58	22	198	0.285714	0.431373	-0.145658	-0.594361	0	321
9416	Q96KP4	55748	CNDP2	CNDP2	Cytosolic non-specific dipeptidase (EC 3.4.13.18) (CNDP dipeptidase 2) (Carnosine dipeptidase II) (Epididymis secretory protein Li 13) (Glutamate carboxypeptidase-like protein 1) (Peptidase A)	83	14	198	0.408867	0.27451	0.134357	0.574774	5	286
2114	P22626	3181	HNRNPA2B1	ROA2	Heterogeneous nuclear ribonucleoproteins A2/B1 (hnRNP A2/B1)	63	14	197	0.310345	0.27451	0.035835	0.177014	2	346
2348	P26006	3675	ITGA3	ITA3	Integrin alpha-3 (CD49 antigen-like family member C) (FRP-2) (Galactoprotein B3) (GAPB3) (VLA-3 subunit alpha) (CD antigen CD49c) [Cleaved into: Integrin alpha-3 heavy chain; Integrin alpha-3 light chain]	82	7	197	0.403941	0.137255	0.266686	1.55729	0	220
3643	P17980	5702	PSMC3	PRS6A	26S protease regulatory subunit 6A (26S proteasome AAA-ATPase subunit RPT5) (Proteasome 26S subunit ATPase 3) (Proteasome subunit P50) (Tat-binding protein 1) (TBP-1)	66	10	197	0.325123	0.196078	0.129045	0.729555	0	336
4016	P62277	6207	RPS13	RS13	40S ribosomal protein S13 (Small ribosomal subunit protein uS15)	57	15	197	0.280788	0.294118	-0.0133295	-0.0669112	23	246
4051	P10301	6237	RRAS	RRAS	Ras-related protein R-Ras (p23)	72	11	197	0.35468	0.215686	0.138994	0.717583	0	533
11628	P81605	117159	DCD	DCD	Dermcidin (EC 3.4.-.-) (Preproteolysin) [Cleaved into: Survival-promoting peptide; DCD-1]	67	14	197	0.330049	0.27451	0.0555395	0.265824	0	197
1721	P29992	2767	GNA11	GNA11	Guanine nucleotide-binding protein subunit alpha-11 (G alpha-11) (G-protein subunit alpha-11) (Guanine nucleotide-binding protein G(y) subunit alpha)	81	12	196	0.399015	0.235294	0.163721	0.761977	0	444
2536	P13473	3920	LAMP2	LAMP2	Lysosome-associated membrane glycoprotein 2 (LAMP-2) (Lysosome-associated membrane protein 2) (CD107 antigen-like family member B) (LGP-96) (CD antigen CD107b)	76	9	196	0.374384	0.176471	0.197914	1.08509	0	328
3641	P35998	5701	PSMC2	PRS7	26S protease regulatory subunit 7 (26S proteasome AAA-ATPase subunit RPT1) (Proteasome 26S subunit ATPase 2) (Protein MSS1)	77	12	196	0.37931	0.235294	0.144016	0.688913	0	336
3929	P62917	6132	RPL8	RL8	60S ribosomal protein L8 (Large ribosomal subunit protein uL2)	71	14	196	0.349754	0.27451	0.0752439	0.349482	33	247
8	P49588	16	AARS1	SYAC	Alanine--tRNA ligase, cytoplasmic (EC 6.1.1.7) (Alanyl-tRNA synthetase) (AlaRS) (Renal carcinoma antigen NY-REN-42)	71	20	195	0.349754	0.392157	-0.0424032	-0.165092	20	245
1340	P63241	1984	EIF5A	IF5A1	Eukaryotic translation initiation factor 5A-1 (eIF-5A-1) (eIF-5A1) (Eukaryotic initiation factor 5A isoform 1) (eIF-5A) (Rev-binding factor) (eIF-4D)	65	18	195	0.320197	0.352941	-0.0327441	-0.140468	11	275
2469	P13647	3852	KRT5	K2C5	Keratin, type II cytoskeletal 5 (58 kDa cytokeratin) (Cytokeratin-5) (CK-5) (Keratin-5) (K5) (Type-II keratin Kb5)	75	19	195	0.369458	0.372549	-0.00309089	-0.0120194	0	437
4007	P62081	6201	RPS7	RS7	40S ribosomal protein S7 (Small ribosomal subunit protein eS7)	68	16	195	0.334975	0.313725	0.0212499	0.0945523	0	250
4919	P13010	7520	XRCC5	XRCC5	X-ray repair cross-complementing protein 5 (EC 3.6.4.-) (86 kDa subunit of Ku antigen) (ATP-dependent DNA helicase 2 subunit 2) (ATP-dependent DNA helicase II 80 kDa subunit) (CTC box-binding factor 85 kDa subunit) (CTC85) (CTCBF) (DNA repair protein XRCC5) (Ku80) (Ku86) (Lupus Ku autoantigen protein p86) (Nuclear factor IV) (Thyroid-lupus autoantigen) (TLAA) (X-ray repair complementing defective…	71	17	195	0.349754	0.333333	0.0164204	0.0693737	0	205
7505	Q8WWI5	23446	SLC44A1	CTL1	Choline transporter-like protein 1 (CDw92) (Solute carrier family 44 member 1) (CD antigen CD92)	76	13	195	0.374384	0.254902	0.119482	0.554577	0	312
11125	Q9BQE3	84790	TUBA1C	TBA1C	Tubulin alpha-1C chain (Alpha-tubulin 6) (Tubulin alpha-6 chain) [Cleaved into: Detyrosinated tubulin alpha-1C chain]	59	11	195	0.29064	0.215686	0.0749541	0.430301	0	544
2483	P02533	3861	KRT14	K1C14	Keratin, type I cytoskeletal 14 (Cytokeratin-14) (CK-14) (Keratin-14) (K14)	72	20	194	0.35468	0.392157	-0.0374771	-0.144914	0	343
4277	P53985	6566	SLC16A1	MOT1	Monocarboxylate transporter 1 (MCT 1) (Solute carrier family 16 member 1)	76	17	194	0.374384	0.333333	0.0410509	0.167554	6	370
12031	Q5VW32	148362	BROX	BROX	BRO1 domain-containing protein BROX (BRO1 domain- and CAAX motif-containing protein)	93	10	194	0.458128	0.196078	0.26205	1.22432	0	252
598	P27824	821	CANX	CALX	Calnexin (IP90) (Major histocompatibility complex class I antigen-binding protein p88) (p90)	73	21	193	0.359606	0.411765	-0.0521588	-0.195403	0	259
1151	Q08211	1660	DHX9	DHX9	ATP-dependent RNA helicase A (RHA) (EC 3.6.4.13) (DEAH box protein 9) (Leukophysin) (LKP) (Nuclear DNA helicase II) (NDH II)	65	16	193	0.320197	0.313725	0.00647155	0.0294572	2	277
3648	P62333	5706	PSMC6	PRS10	26S protease regulatory subunit 10B (26S proteasome AAA-ATPase subunit RPT4) (Proteasome 26S subunit ATPase 6) (Proteasome subunit p42)	64	13	193	0.315271	0.254902	0.060369	0.30665	0	336
3769	P20339	5868	RAB5A	RAB5A	Ras-related protein Rab-5A	78	13	193	0.384236	0.254902	0.129334	0.592052	0	394
6228	P61163	10121	ACTR1A	ACTZ	Alpha-centractin (Centractin) (ARP1) (Actin-RPV) (Centrosome-associated actin homolog)	59	15	193	0.29064	0.294118	-0.00347725	-0.0171581	0	592
2940	P55209	4673	NAP1L1	NP1L1	Nucleosome assembly protein 1-like 1 (NAP-1-related protein) (hNRP)	63	18	192	0.310345	0.352941	-0.0425963	-0.185556	0	262
2958	P19338	4691	NCL	NUCL	Nucleolin (Protein C23)	62	15	192	0.305419	0.294118	0.0113011	0.0543951	0	240
3753	P11216	5834	PYGB	PYGB	Glycogen phosphorylase, brain form (EC 2.4.1.1)	70	14	192	0.344828	0.27451	0.0703178	0.329018	11	286
3938	P26373	6137	RPL13	RL13	60S ribosomal protein L13 (Breast basic conserved protein 1) (Large ribosomal subunit protein eL13)	74	16	192	0.364532	0.313725	0.0508065	0.216543	0	260
4439	P50502	6767	ST13	F10A1	Hsc70-interacting protein (Hip) (Aging-associated protein 2) (Progesterone receptor-associated p48 protein) (Protein FAM10A1) (Putative tumor suppressor ST13) (Renal carcinoma antigen NY-REN-33) (Suppression of tumorigenicity 13 protein)	76	11	192	0.374384	0.215686	0.158698	0.795585	0	274
8443	P28838	51056	LAP3	AMPL	Cytosol aminopeptidase (EC 3.4.11.1) (Leucine aminopeptidase 3) (LAP-3) (Leucyl aminopeptidase) (Peptidase S) (Proline aminopeptidase) (EC 3.4.11.5) (Prolyl aminopeptidase)	67	14	192	0.330049	0.27451	0.0555395	0.265824	29	244
10220	Q96TA1	64855	NIBAN2	NIBL1	Niban-like protein 1 (Meg-3) (Melanoma invasion by ERK) (MINERVA) (Protein FAM129B)	74	11	192	0.364532	0.215686	0.148846	0.757111	0	254
11081	Q9BUF5	84617	TUBB6	TBB6	Tubulin beta-6 chain (Tubulin beta class V)	66	15	192	0.325123	0.294118	0.0310055	0.144593	0	544
206	P15144	290	ANPEP	AMPN	Aminopeptidase N (AP-N) (hAPN) (EC 3.4.11.2) (Alanyl aminopeptidase) (Aminopeptidase M) (AP-M) (Microsomal aminopeptidase) (Myeloid plasma membrane glycoprotein CD13) (gp150) (CD antigen CD13)	75	19	191	0.369458	0.372549	-0.00309089	-0.0120194	17	405
2346	P17301	3673	ITGA2	ITA2	Integrin alpha-2 (CD49 antigen-like family member B) (Collagen receptor) (Platelet membrane glycoprotein Ia) (GPIa) (VLA-2 subunit alpha) (CD antigen CD49b)	71	19	191	0.349754	0.372549	-0.0227953	-0.091091	0	202
3466	P62136	5499	PPP1CA	PP1A	Serine/threonine-protein phosphatase PP1-alpha catalytic subunit (PP-1A) (EC 3.1.3.16)	72	10	191	0.35468	0.196078	0.158601	0.855086	0	299
3629	P28070	5692	PSMB4	PSB4	Proteasome subunit beta type-4 (EC 3.4.25.1) (26 kDa prosomal protein) (HsBPROS26) (PROS-26) (Macropain beta chain) (Multicatalytic endopeptidase complex beta chain) (Proteasome beta chain) (Proteasome chain 3) (HsN3)	58	15	191	0.285714	0.294118	-0.00840336	-0.0418202	0	241
3998	P46782	6193	RPS5	RS5	40S ribosomal protein S5 (Small ribosomal subunit protein uS7) [Cleaved into: 40S ribosomal protein S5, N-terminally processed]	55	16	191	0.270936	0.313725	-0.0427895	-0.211551	42	276
928	P53618	1315	COPB1	COPB	Coatomer subunit beta (Beta-coat protein) (Beta-COP)	55	17	190	0.270936	0.333333	-0.0623974	-0.299014	0	318
1611	P12956	2547	XRCC6	XRCC6	X-ray repair cross-complementing protein 6 (EC 3.6.4.-) (EC 4.2.99.-) (5'-deoxyribose-5-phosphate lyase Ku70) (5'-dRP lyase Ku70) (70 kDa subunit of Ku antigen) (ATP-dependent DNA helicase 2 subunit 1) (ATP-dependent DNA helicase II 70 kDa subunit) (CTC box-binding factor 75 kDa subunit) (CTC75) (CTCBF) (DNA repair protein XRCC6) (Lupus Ku autoantigen protein p70) (Ku70) (Thyroid-lupus autoantige…	62	15	190	0.305419	0.294118	0.0113011	0.0543951	0	203
4076	P06702	6280	S100A9	S10A9	Protein S100-A9 (Calgranulin-B) (Calprotectin L1H subunit) (Leukocyte L1 complex heavy chain) (Migration inhibitory factor-related protein 14) (MRP-14) (p14) (S100 calcium-binding protein A9)	74	10	190	0.364532	0.196078	0.168454	0.894615	0	217
4394	Q01082	6711	SPTBN1	SPTB2	Spectrin beta chain, non-erythrocytic 1 (Beta-II spectrin) (Fodrin beta chain) (Spectrin, non-erythroid beta chain 1)	64	19	190	0.315271	0.372549	-0.0572781	-0.240838	0	536
4822	Q16851	7360	UGP2	UGPA	UTP--glucose-1-phosphate uridylyltransferase (EC 2.7.7.9) (UDP-glucose pyrophosphorylase) (UDPGP) (UGPase)	59	15	190	0.29064	0.294118	-0.00347725	-0.0171581	0	265
2902	P35580	4628	MYH10	MYH10	Myosin-10 (Cellular myosin heavy chain, type B) (Myosin heavy chain 10) (Myosin heavy chain, non-muscle IIb) (Non-muscle myosin heavy chain B) (NMMHC-B) (Non-muscle myosin heavy chain IIb) (NMMHC II-b) (NMMHC-IIB)	75	16	189	0.369458	0.313725	0.0557326	0.235908	0	508
3270	P17858	5211	PFKL	PFKAL	ATP-dependent 6-phosphofructokinase, liver type (ATP-PFK) (PFK-L) (EC 2.7.1.11) (6-phosphofructokinase type B) (Phosphofructo-1-kinase isozyme B) (PFK-B) (Phosphohexokinase)	71	15	189	0.349754	0.294118	0.055636	0.249946	15	296
3666	O00232	5718	PSMD12	PSD12	26S proteasome non-ATPase regulatory subunit 12 (26S proteasome regulatory subunit RPN5) (26S proteasome regulatory subunit p55)	65	11	189	0.320197	0.215686	0.104511	0.570026	0	232
3940	P61313	6138	RPL15	RL15	60S ribosomal protein L15 (Large ribosomal subunit protein eL15)	69	13	189	0.339901	0.254902	0.0849995	0.415174	0	246
4520	P37837	6888	TALDO1	TALDO	Transaldolase (EC 2.2.1.2)	67	13	189	0.330049	0.254902	0.0751473	0.372739	23	246
4805	P61088	7334	UBE2N	UBE2N	Ubiquitin-conjugating enzyme E2 N (EC 2.3.2.23) (Bendless-like ubiquitin-conjugating enzyme) (E2 ubiquitin-conjugating enzyme N) (Ubc13) (UbcH13) (Ubiquitin carrier protein N) (Ubiquitin-protein ligase N)	65	15	189	0.320197	0.294118	0.0260794	0.122567	0	276
5789	P78417	9446	GSTO1	GSTO1	Glutathione S-transferase omega-1 (GSTO-1) (EC 2.5.1.18) (Glutathione S-transferase omega 1-1) (GSTO 1-1) (Glutathione-dependent dehydroascorbate reductase) (EC 1.8.5.1) (Monomethylarsonic acid reductase) (MMA(V) reductase) (EC 1.20.4.2) (S-(Phenacyl)glutathione reductase) (SPG-R)	64	14	189	0.315271	0.27451	0.0407611	0.199735	0	229
7597	Q9ULV4	23603	CORO1C	COR1C	Coronin-1C (Coronin-3) (hCRNN4)	63	14	189	0.310345	0.27451	0.035835	0.177014	0	318
9720	Q9NQC3	57142	RTN4	RTN4	Reticulon-4 (Foocen) (Neurite outgrowth inhibitor) (Nogo protein) (Neuroendocrine-specific protein) (NSP) (Neuroendocrine-specific protein C homolog) (RTN-x) (Reticulon-5)	61	12	189	0.300493	0.235294	0.0651985	0.352864	0	259
1736	P50148	2776	GNAQ	GNAQ	Guanine nucleotide-binding protein G(q) subunit alpha (Guanine nucleotide-binding protein alpha-q)	80	15	188	0.394089	0.294118	0.099971	0.422127	0	444
3652	O43242	5709	PSMD3	PSMD3	26S proteasome non-ATPase regulatory subunit 3 (26S proteasome regulatory subunit RPN3) (26S proteasome regulatory subunit S3) (Proteasome subunit p58)	65	14	188	0.320197	0.27451	0.0456872	0.222102	0	257
9726	Q8IWA5	57153	SLC44A2	CTL2	Choline transporter-like protein 2 (Solute carrier family 44 member 2)	87	8	188	0.428571	0.156863	0.271709	1.45003	0	312
254	P02647	335	APOA1	APOA1	Apolipoprotein A-I (Apo-AI) (ApoA-I) (Apolipoprotein A1) [Cleaved into: Proapolipoprotein A-I (ProapoA-I); Truncated apolipoprotein A-I (Apolipoprotein A-I(1-242))]	85	16	187	0.418719	0.313725	0.104994	0.41648	0	227
7907	Q9NZM1	26509	MYOF	MYOF	Myoferlin (Fer-1-like protein 3)	62	9	187	0.305419	0.176471	0.128948	0.791361	0	235
114	O95782	160	AP2A1	AP2A1	AP-2 complex subunit alpha-1 (100 kDa coated vesicle protein A) (Adaptor protein complex AP-2 subunit alpha-1) (Adaptor-related protein complex 2 subunit alpha-1) (Alpha-adaptin A) (Alpha1-adaptin) (Clathrin assembly protein complex 2 alpha-A large chain) (Plasma membrane adaptor HA2/AP2 adaptin alpha A subunit)	56	17	186	0.275862	0.333333	-0.0574713	-0.273018	0	256
722	P08962	967	CD63	CD63	CD63 antigen (Granulophysin) (Lysosomal-associated membrane protein 3) (LAMP-3) (Melanoma-associated antigen ME491) (OMA81H) (Ocular melanoma-associated antigen) (Tetraspanin-30) (Tspan-30) (CD antigen CD63)	75	4	186	0.369458	0.0784314	0.291027	2.23591	0	453
1406	P07814	2058	EPRS1	SYEP	Bifunctional glutamate/proline--tRNA ligase (Bifunctional aminoacyl-tRNA synthetase) (Cell proliferation-inducing gene 32 protein) (Glutamatyl-prolyl-tRNA synthetase) [Includes: Glutamate--tRNA ligase (EC 6.1.1.17) (Glutamyl-tRNA synthetase) (GluRS); Proline--tRNA ligase (EC 6.1.1.15) (Prolyl-tRNA synthetase)]	63	13	186	0.310345	0.254902	0.0554429	0.28393	12	246
7078	Q9Y678	22820	COPG1	COPG1	Coatomer subunit gamma-1 (Gamma-1-coat protein) (Gamma-1-COP)	54	20	186	0.26601	0.392157	-0.126147	-0.559951	0	235
2134	Q00839	3192	HNRNPU	HNRPU	Heterogeneous nuclear ribonucleoprotein U (hnRNP U) (Scaffold attachment factor A) (SAF-A) (p120) (pp120)	68	10	185	0.334975	0.196078	0.138897	0.772624	0	236
2183	P38646	3313	HSPA9	GRP75	Stress-70 protein, mitochondrial (75 kDa glucose-regulated protein) (GRP-75) (Heat shock 70 kDa protein 9) (Mortalin) (MOT) (Peptide-binding protein 74) (PBP74)	53	16	185	0.261084	0.313725	-0.0526417	-0.26499	40	568
3186	Q15366	5094	PCBP2	PCBP2	Poly(rC)-binding protein 2 (Alpha-CP2) (Heterogeneous nuclear ribonucleoprotein E2) (hnRNP E2)	57	12	185	0.280788	0.235294	0.0454941	0.255017	0	293
3941	P18621	6139	RPL17	RL17	60S ribosomal protein L17 (60S ribosomal protein L23) (Large ribosomal subunit protein uL22) (PD-1)	55	14	185	0.270936	0.27451	-0.00357384	-0.0189058	40	246
3959	P62888	6156	RPL30	RL30	60S ribosomal protein L30 (Large ribosomal subunit protein eL30)	56	13	185	0.275862	0.254902	0.0209601	0.114005	0	246
4034	P60866	6224	RPS20	RS20	40S ribosomal protein S20 (Small ribosomal subunit protein uS10)	59	14	185	0.29064	0.27451	0.0161306	0.0823776	26	227
4405	P30626	6717	SRI	SORCN	Sorcin (22 kDa protein) (CP-22) (CP22) (V19)	70	8	185	0.344828	0.156863	0.187965	1.13637	0	364
8524	Q9UK41	51160	VPS28	VPS28	Vacuolar protein sorting-associated protein 28 homolog (H-Vps28) (ESCRT-I complex subunit VPS28)	77	6	185	0.37931	0.117647	0.261663	1.68891	0	227
9524	Q9UBI6	55970	GNG12	GBG12	Guanine nucleotide-binding protein G(I)/G(S)/G(O) subunit gamma-12	81	10	185	0.399015	0.196078	0.202936	1.02501	0	271
611	P04632	826	CAPNS1	CPNS1	Calpain small subunit 1 (CSS1) (Calcium-activated neutral proteinase small subunit) (CANP small subunit) (Calcium-dependent protease small subunit) (CDPS) (Calcium-dependent protease small subunit 1) (Calpain regulatory subunit)	59	10	184	0.29064	0.196078	0.094562	0.567804	0	364
702	Q14108	950	SCARB2	SCRB2	Lysosome membrane protein 2 (85 kDa lysosomal membrane sialoglycoprotein) (LGP85) (CD36 antigen-like 2) (Lysosome membrane protein II) (LIMP II) (Scavenger receptor class B member 2) (CD antigen CD36)	73	7	184	0.359606	0.137255	0.222351	1.38956	0	306
3802	P11234	5899	RALB	RALB	Ras-related protein Ral-B	69	8	184	0.339901	0.156863	0.183039	1.11561	0	533
7471	Q92542	23385	NCSTN	NICA	Nicastrin	73	8	184	0.359606	0.156863	0.202743	1.19691	0	234
1053	P35222	1499	CTNNB1	CTNB1	Catenin beta-1 (Beta-catenin)	80	12	183	0.394089	0.235294	0.158795	0.744055	9	328
2116	P07910	3183	HNRNPC	HNRPC	Heterogeneous nuclear ribonucleoproteins C1/C2 (hnRNP C1/C2)	54	14	183	0.26601	0.27451	-0.00849995	-0.045378	2	346
3778	P51153	5872	RAB13	RAB13	Ras-related protein Rab-13 (Cell growth-inhibiting gene 4 protein)	70	11	183	0.344828	0.215686	0.129141	0.676941	0	410
4348	P00441	6647	SOD1	SODC	Superoxide dismutase [Cu-Zn] (EC 1.15.1.1) (Superoxide dismutase 1) (hSod1)	62	13	183	0.305419	0.254902	0.0505168	0.260846	22	253
4851	P50552	7408	VASP	VASP	Vasodilator-stimulated phosphoprotein (VASP)	62	18	183	0.305419	0.352941	-0.0475225	-0.208639	0	220
5299	Q14152	8661	EIF3A	EIF3A	Eukaryotic translation initiation factor 3 subunit A (eIF3a) (Eukaryotic translation initiation factor 3 subunit 10) (eIF-3-theta) (eIF3 p167) (eIF3 p180) (eIF3 p185)	61	13	183	0.300493	0.254902	0.0455907	0.237387	0	237
7678	O95336	25796	PGLS	6PGL	6-phosphogluconolactonase (6PGL) (EC 3.1.1.31)	69	12	183	0.339901	0.235294	0.104607	0.530651	2	239
1591	P02792	2512	FTL	FRIL	Ferritin light chain (Ferritin L subunit)	65	6	182	0.320197	0.117647	0.20255	1.44449	0	185
2998	P62906	4736	RPL10A	RL10A	60S ribosomal protein L10a (CSA-19) (Large ribosomal subunit protein uL1) (Neural precursor cell expressed developmentally down-regulated protein 6) (NEDD-6)	59	13	182	0.29064	0.254902	0.0357384	0.189293	40	220
3774	P20340	5870	RAB6A	RAB6A	Ras-related protein Rab-6A (Rab-6)	62	10	182	0.305419	0.196078	0.10934	0.639358	0	265
4574	P02787	7018	TF	TRFE	Serotransferrin (Transferrin) (Beta-1 metal-binding globulin) (Siderophilin)	88	21	182	0.433498	0.411765	0.0217328	0.0742036	0	389
7621	O15031	23654	PLXNB2	PLXB2	Plexin-B2 (MM1)	75	7	182	0.369458	0.137255	0.232203	1.42855	0	230
604	P07384	823	CAPN1	CAN1	Calpain-1 catalytic subunit (EC 3.4.22.52) (Calcium-activated neutral proteinase 1) (CANP 1) (Calpain mu-type) (Calpain-1 large subunit) (Cell proliferation-inducing gene 30 protein) (Micromolar-calpain) (muCANP)	66	17	181	0.325123	0.333333	-0.00821018	-0.0359793	0	310
1708	Q04760	2739	GLO1	LGUL	Lactoylglutathione lyase (EC 4.4.1.5) (Aldoketomutase) (Glyoxalase I) (Glx I) (Ketone-aldehyde mutase) (Methylglyoxalase) (S-D-lactoylglutathione methylglyoxal lyase)	67	12	181	0.330049	0.235294	0.0947551	0.488216	1	198
3650	Q99460	5707	PSMD1	PSMD1	26S proteasome non-ATPase regulatory subunit 1 (26S proteasome regulatory subunit RPN2) (26S proteasome regulatory subunit S1) (26S proteasome subunit p112)	61	11	181	0.300493	0.215686	0.0848063	0.478395	0	237
4392	Q13813	6709	SPTAN1	SPTN1	Spectrin alpha chain, non-erythrocytic 1 (Alpha-II spectrin) (Fodrin alpha chain) (Spectrin, non-erythroid alpha subunit)	58	20	181	0.285714	0.392157	-0.106443	-0.456858	0	536
6357	O60884	10294	DNAJA2	DNJA2	DnaJ homolog subfamily A member 2 (Cell cycle progression restoration gene 3 protein) (Dnj3) (Dj3) (HIRA-interacting protein 4) (Renal carcinoma antigen NY-REN-14)	65	12	181	0.320197	0.235294	0.0849029	0.444495	8	327
3151	Q9UQ80	5036	PA2G4	PA2G4	Proliferation-associated protein 2G4 (Cell cycle protein p38-2G4 homolog) (hG4-1) (ErbB3-binding protein 1)	59	18	180	0.29064	0.352941	-0.0623008	-0.280193	3	233
3645	P62195	5705	PSMC5	PRS8	26S protease regulatory subunit 8 (26S proteasome AAA-ATPase subunit RPT6) (Proteasome 26S subunit ATPase 5) (Proteasome subunit p45) (Thyroid hormone receptor-interacting protein 1) (TRIP1) (p45/SUG)	58	13	180	0.285714	0.254902	0.0308123	0.164631	0	336
6380	P14550	10327	AKR1A1	AK1A1	Alcohol dehydrogenase [NADP(+)] (EC 1.1.1.2) (Aldehyde reductase) (Aldo-keto reductase family 1 member A1)	80	9	180	0.394089	0.176471	0.217618	1.15909	5	321
7070	P62070	22800	RRAS2	RRAS2	Ras-related protein R-Ras2 (Ras-like protein TC21) (Teratocarcinoma oncogene)	85	9	180	0.418719	0.176471	0.242249	1.24656	0	533
12098	Q9H4G4	152007	GLIPR2	GAPR1	Golgi-associated plant pathogenesis-related protein 1 (GAPR-1) (Golgi-associated PR-1 protein) (Glioma pathogenesis-related protein 2) (GliPR 2)	64	12	180	0.315271	0.235294	0.0799768	0.422127	5	235
378	P23634	493	ATP2B4	AT2B4	Plasma membrane calcium-transporting ATPase 4 (PMCA4) (EC 3.6.3.8) (Matrix-remodeling-associated protein 1) (Plasma membrane calcium ATPase isoform 4) (Plasma membrane calcium pump isoform 4)	71	9	179	0.349754	0.176471	0.173283	0.986912	0	284
2119	Q14103	3184	HNRNPD	HNRPD	Heterogeneous nuclear ribonucleoprotein D0 (hnRNP D0) (AU-rich element RNA-binding protein 1)	55	12	179	0.270936	0.235294	0.0356418	0.203487	2	346
2315	P12268	3615	IMPDH2	IMDH2	Inosine-5'-monophosphate dehydrogenase 2 (IMP dehydrogenase 2) (IMPD 2) (IMPDH 2) (EC 1.1.1.205) (IMPDH-II)	58	16	179	0.285714	0.313725	-0.0280112	-0.13493	31	230
2430	P33176	3799	KIF5B	KINH	Kinesin-1 heavy chain (Conventional kinesin heavy chain) (Ubiquitous kinesin heavy chain) (UKHC)	63	16	179	0.310345	0.313725	-0.00338066	-0.0156307	0	351
3669	Q06323	5720	PSME1	PSME1	Proteasome activator complex subunit 1 (11S regulator complex subunit alpha) (REG-alpha) (Activator of multicatalytic protease subunit 1) (Interferon gamma up-regulated I-5111 protein) (IGUP I-5111) (Proteasome activator 28 subunit alpha) (PA28a) (PA28alpha)	46	15	179	0.226601	0.294118	-0.0675167	-0.376239	0	266
3672	Q9UL46	5721	PSME2	PSME2	Proteasome activator complex subunit 2 (11S regulator complex subunit beta) (REG-beta) (Activator of multicatalytic protease subunit 2) (Proteasome activator 28 subunit beta) (PA28b) (PA28beta)	58	18	179	0.285714	0.352941	-0.0672269	-0.304855	0	266
4864	P21796	7416	VDAC1	VDAC1	Voltage-dependent anion-selective channel protein 1 (VDAC-1) (hVDAC1) (Outer mitochondrial membrane protein porin 1) (Plasmalemmal porin) (Porin 31HL) (Porin 31HM)	55	17	179	0.270936	0.333333	-0.0623974	-0.299014	0	246
6725	Q92598	10808	HSPH1	HS105	Heat shock protein 105 kDa (Antigen NY-CO-25) (Heat shock 110 kDa protein)	69	13	179	0.339901	0.254902	0.0849995	0.415174	40	568
9887	Q9P265	57609	DIP2B	DIP2B	Disco-interacting protein 2 homolog B (DIP2 homolog B)	76	8	179	0.374384	0.156863	0.217521	1.25502	11	232
616	P47755	830	CAPZA2	CAZA2	F-actin-capping protein subunit alpha-2 (CapZ alpha-2)	60	14	178	0.295567	0.27451	0.0210567	0.106625	0	331
5478	Q99829	8904	CPNE1	CPNE1	Copine-1 (Chromobindin 17) (Copine I)	65	10	178	0.320197	0.196078	0.124119	0.707529	0	328
5685	P35606	9276	COPB2	COPB2	Coatomer subunit beta' (Beta'-coat protein) (Beta'-COP) (p102)	61	14	178	0.300493	0.27451	0.0259828	0.130472	0	225
374	P20020	490	ATP2B1	AT2B1	Plasma membrane calcium-transporting ATPase 1 (PMCA1) (EC 3.6.3.8) (Plasma membrane calcium ATPase isoform 1) (Plasma membrane calcium pump isoform 1)	69	10	177	0.339901	0.196078	0.143823	0.793686	0	284
3086	P67809	4904	YBX1	YBOX1	Nuclease-sensitive element-binding protein 1 (CCAAT-binding transcription factor I subunit A) (CBF-A) (DNA-binding protein B) (DBPB) (Enhancer factor I subunit A) (EFI-A) (Y-box transcription factor) (Y-box-binding protein 1) (YB-1)	60	10	177	0.295567	0.196078	0.0994881	0.592052	12	242
6498	O60506	10492	SYNCRIP	HNRPQ	Heterogeneous nuclear ribonucleoprotein Q (hnRNP Q) (Glycine- and tyrosine-rich RNA-binding protein) (GRY-RBP) (NS1-associated protein 1) (Synaptotagmin-binding, cytoplasmic RNA-interacting protein)	54	10	177	0.26601	0.196078	0.0699314	0.440049	0	233
164	P49189	223	ALDH9A1	AL9A1	4-trimethylaminobutyraldehyde dehydrogenase (TMABADH) (EC 1.2.1.47) (Aldehyde dehydrogenase E3 isozyme) (Aldehyde dehydrogenase family 9 member A1) (EC 1.2.1.3) (Gamma-aminobutyraldehyde dehydrogenase) (EC 1.2.1.19) (R-aminobutyraldehyde dehydrogenase) [Cleaved into: 4-trimethylaminobutyraldehyde dehydrogenase, N-terminally processed]	69	13	176	0.339901	0.254902	0.0849995	0.415174	54	361
170	P15121	231	AKR1B1	ALDR	Aldose reductase (AR) (EC 1.1.1.21) (Aldehyde reductase) (Aldo-keto reductase family 1 member B1)	78	13	176	0.384236	0.254902	0.129334	0.592052	5	321
3445	Q15181	5464	PPA1	IPYR	Inorganic pyrophosphatase (EC 3.6.1.1) (Pyrophosphate phospho-hydrolase) (PPase)	58	12	176	0.285714	0.235294	0.0504202	0.280108	13	213
4025	P62244	6210	RPS15A	RS15A	40S ribosomal protein S15a (Small ribosomal subunit protein uS8)	51	12	176	0.251232	0.235294	0.0159374	0.0945523	29	223
4073	P06703	6277	S100A6	S10A6	Protein S100-A6 (Calcyclin) (Growth factor-inducible protein 2A9) (MLN 4) (Prolactin receptor-associated protein) (PRA) (S100 calcium-binding protein A6)	58	11	176	0.285714	0.215686	0.070028	0.405639	0	215
4821	O60701	7358	UGDH	UGDH	UDP-glucose 6-dehydrogenase (UDP-Glc dehydrogenase) (UDP-GlcDH) (UDPGDH) (EC 1.1.1.22)	71	14	176	0.349754	0.27451	0.0752439	0.349482	4	201
5047	P45974	8078	USP5	UBP5	Ubiquitin carboxyl-terminal hydrolase 5 (EC 3.4.19.12) (Deubiquitinating enzyme 5) (Isopeptidase T) (Ubiquitin thioesterase 5) (Ubiquitin-specific-processing protease 5)	63	12	176	0.310345	0.235294	0.0750507	0.399407	0	219
6055	Q15008	9861	PSMD6	PSMD6	26S proteasome non-ATPase regulatory subunit 6 (26S proteasome regulatory subunit RPN7) (26S proteasome regulatory subunit S10) (Breast cancer-associated protein SGA-113M) (Phosphonoformate immuno-associated protein 4) (Proteasome regulatory particle subunit p44S10) (p42A)	61	14	176	0.300493	0.27451	0.0259828	0.130472	0	226
135	P02765	197	AHSG	FETUA	Alpha-2-HS-glycoprotein (Alpha-2-Z-globulin) (Ba-alpha-2-glycoprotein) (Fetuin-A) [Cleaved into: Alpha-2-HS-glycoprotein chain A; Alpha-2-HS-glycoprotein chain B]	94	11	175	0.463054	0.215686	0.247368	1.10225	0	226
404	P36543	529	ATP6V1E1	VATE1	V-type proton ATPase subunit E 1 (V-ATPase subunit E 1) (V-ATPase 31 kDa subunit) (p31) (Vacuolar proton pump subunit E 1)	63	12	175	0.310345	0.235294	0.0750507	0.399407	0	225
2113	P09651	3178	HNRNPA1	ROA1	Heterogeneous nuclear ribonucleoprotein A1 (hnRNP A1) (Helix-destabilizing protein) (Single-strand RNA-binding protein) (hnRNP core protein A1) [Cleaved into: Heterogeneous nuclear ribonucleoprotein A1, N-terminally processed]	52	12	175	0.256158	0.235294	0.0208635	0.122567	2	346
3668	Q9UNM6	5719	PSMD13	PSD13	26S proteasome non-ATPase regulatory subunit 13 (26S proteasome regulatory subunit RPN9) (26S proteasome regulatory subunit S11) (26S proteasome regulatory subunit p40.5)	52	11	175	0.256158	0.215686	0.0404714	0.248098	0	226
3697	O00391	5768	QSOX1	QSOX1	Sulfhydryl oxidase 1 (hQSOX) (EC 1.8.3.2) (Quiescin Q6)	64	9	175	0.315271	0.176471	0.1388	0.837164	0	210
3789	P15153	5880	RAC2	RAC2	Ras-related C3 botulinum toxin substrate 2 (GX) (Small G protein) (p21-Rac2)	60	20	175	0.295567	0.392157	-0.0965904	-0.407948	0	533
3823	P54136	5917	RARS1	SYRC	Arginine--tRNA ligase, cytoplasmic (EC 6.1.1.19) (Arginyl-tRNA synthetase) (ArgRS)	58	12	175	0.285714	0.235294	0.0504202	0.280108	10	224
5300	P55884	8662	EIF3B	EIF3B	Eukaryotic translation initiation factor 3 subunit B (eIF3b) (Eukaryotic translation initiation factor 3 subunit 9) (Prt1 homolog) (hPrt1) (eIF-3-eta) (eIF3 p110) (eIF3 p116)	58	16	175	0.285714	0.313725	-0.0280112	-0.13493	0	233
5712	Q15836	9341	VAMP3	VAMP3	Vesicle-associated membrane protein 3 (VAMP-3) (Cellubrevin) (CEB) (Synaptobrevin-3)	60	6	175	0.295567	0.117647	0.177919	1.32902	0	297
6203	O15143	10095	ARPC1B	ARC1B	Actin-related protein 2/3 complex subunit 1B (Arp2/3 complex 41 kDa subunit) (p41-ARC)	53	14	175	0.261084	0.27451	-0.0134261	-0.072345	0	235
7188	Q9UL25	23011	RAB21	RAB21	Ras-related protein Rab-21	68	13	175	0.334975	0.254902	0.0800734	0.394113	0	214
7959	Q7KZF4	27044	SND1	SND1	Staphylococcal nuclease domain-containing protein 1 (100 kDa coactivator) (EBNA2 coactivator p100) (Tudor domain-containing protein 11) (p100 co-activator)	60	12	175	0.295567	0.235294	0.0602724	0.329018	2	242
10464	Q9H9H4	79720	VPS37B	VP37B	Vacuolar protein sorting-associated protein 37B (hVps37B) (ESCRT-I complex subunit VPS37B)	73	4	175	0.359606	0.0784314	0.281175	2.19691	0	219
1463	Q01469	2171	FABP5	FABP5	Fatty acid-binding protein, epidermal (Epidermal-type fatty acid-binding protein) (E-FABP) (Fatty acid-binding protein 5) (Psoriasis-associated fatty acid-binding protein homolog) (PA-FABP)	62	13	174	0.305419	0.254902	0.0505168	0.260846	0	283
1548	Q02790	2288	FKBP4	FKBP4	Peptidyl-prolyl cis-trans isomerase FKBP4 (PPIase FKBP4) (EC 5.2.1.8) (51 kDa FK506-binding protein) (FKBP51) (52 kDa FK506-binding protein) (52 kDa FKBP) (FKBP-52) (59 kDa immunophilin) (p59) (FK506-binding protein 4) (FKBP-4) (FKBP59) (HSP-binding immunophilin) (HBI) (Immunophilin FKBP52) (Rotamase) [Cleaved into: Peptidyl-prolyl cis-trans isomerase FKBP4, N-terminally processed]	62	14	174	0.305419	0.27451	0.0309089	0.153931	44	278
2148	P00492	3251	HPRT1	HPRT	Hypoxanthine-guanine phosphoribosyltransferase (HGPRT) (HGPRTase) (EC 2.4.2.8)	59	15	174	0.29064	0.294118	-0.00347725	-0.0171581	12	208
2564	P17931	3958	LGALS3	LEG3	Galectin-3 (Gal-3) (35 kDa lectin) (Carbohydrate-binding protein 35) (CBP 35) (Galactose-specific lectin 3) (Galactoside-binding protein) (GALBP) (IgE-binding protein) (L-31) (Laminin-binding protein) (Lectin L-29) (Mac-2 antigen)	60	10	174	0.295567	0.196078	0.0994881	0.592052	0	358
3392	P13797	5358	PLS3	PLST	Plastin-3 (T-plastin)	66	12	174	0.325123	0.235294	0.089829	0.466521	0	536
3640	P62191	5700	PSMC1	PRS4	26S protease regulatory subunit 4 (P26s4) (26S proteasome AAA-ATPase subunit RPT2) (Proteasome 26S subunit ATPase 1)	65	9	174	0.320197	0.176471	0.143726	0.859532	0	336
3957	P61353	6155	RPL27	RL27	60S ribosomal protein L27 (Large ribosomal subunit protein eL27)	57	13	174	0.280788	0.254902	0.0258862	0.13954	0	345
6407	Q13509	10381	TUBB3	TBB3	Tubulin beta-3 chain (Tubulin beta-4 chain) (Tubulin beta-III)	58	11	174	0.285714	0.215686	0.070028	0.405639	0	544
218	P12429	306	ANXA3	ANXA3	Annexin A3 (35-alpha calcimedin) (Annexin III) (Annexin-3) (Inositol 1,2-cyclic phosphate 2-phosphohydrolase) (Lipocortin III) (Placental anticoagulant protein III) (PAP-III)	70	11	173	0.344828	0.215686	0.129141	0.676941	0	542
2587	P02545	4000	LMNA	LMNA	Prelamin-A/C [Cleaved into: Lamin-A/C (70 kDa lamin) (Renal carcinoma antigen NY-REN-32)]	51	15	173	0.251232	0.294118	-0.0428861	-0.227376	0	243
3291	P36871	5236	PGM1	PGM1	Phosphoglucomutase-1 (PGM 1) (EC 5.4.2.2) (Glucose phosphomutase 1)	75	10	173	0.369458	0.196078	0.17338	0.91398	3	214
4915	O14980	7514	XPO1	XPO1	Exportin-1 (Exp1) (Chromosome region maintenance 1 protein homolog)	60	12	173	0.295567	0.235294	0.0602724	0.329018	0	216
399	P21281	526	ATP6V1B2	VATB2	V-type proton ATPase subunit B, brain isoform (V-ATPase subunit B 2) (Endomembrane proton pump 58 kDa subunit) (HO57) (Vacuolar proton pump subunit B 2)	59	14	172	0.29064	0.27451	0.0161306	0.0823776	0	253
2458	O00410	3843	IPO5	IPO5	Importin-5 (Imp5) (Importin subunit beta-3) (Karyopherin beta-3) (Ran-binding protein 5) (RanBP5)	55	15	172	0.270936	0.294118	-0.0231817	-0.118441	0	230
4324	Q16658	6624	FSCN1	FSCN1	Fascin (55 kDa actin-bundling protein) (Singed-like protein) (p55)	63	13	172	0.310345	0.254902	0.0554429	0.28393	0	210
4399	P12931	6714	SRC	SRC	Proto-oncogene tyrosine-protein kinase Src (EC 2.7.10.2) (Proto-oncogene c-Src) (pp60c-src) (p60-Src)	72	13	172	0.35468	0.254902	0.0997778	0.476575	10	419
5840	P55786	9520	NPEPPS	PSA	Puromycin-sensitive aminopeptidase (PSA) (EC 3.4.11.14) (Cytosol alanyl aminopeptidase) (AAP-S)	66	10	172	0.325123	0.196078	0.129045	0.729555	17	405
8500	Q7Z5G4	51125	GOLGA7	GOGA7	Golgin subfamily A member 7 (Golgi complex-associated protein of 16 kDa)	59	7	172	0.29064	0.137255	0.153385	1.08238	0	203
8697	Q9NUQ9	51571	CYRIB	FA49B	Protein FAM49B (L1)	56	13	172	0.275862	0.254902	0.0209601	0.114005	0	208
10687	Q9C0H2	80727	TTYH3	TTYH3	Protein tweety homolog 3 (hTTY3)	75	6	172	0.369458	0.117647	0.251811	1.65095	0	208
1322	P41091	1968	EIF2S3	IF2G	Eukaryotic translation initiation factor 2 subunit 3 (Eukaryotic translation initiation factor 2 subunit gamma X) (eIF-2-gamma X) (eIF-2gX)	51	15	171	0.251232	0.294118	-0.0428861	-0.227376	0	220
2521	O15230	3911	LAMA5	LAMA5	Laminin subunit alpha-5 (Laminin-10 subunit alpha) (Laminin-11 subunit alpha) (Laminin-15 subunit alpha)	72	8	171	0.35468	0.156863	0.197817	1.17701	0	286
4044	P62854	6231	RPS26	RS26	40S ribosomal protein S26 (Small ribosomal subunit protein eS26)	52	10	171	0.256158	0.196078	0.0600792	0.385601	0	218
5896	P13667	9601	PDIA4	PDIA4	Protein disulfide-isomerase A4 (EC 5.3.4.1) (Endoplasmic reticulum resident protein 70) (ER protein 70) (ERp70) (Endoplasmic reticulum resident protein 72) (ER protein 72) (ERp-72) (ERp72)	52	19	171	0.256158	0.372549	-0.116391	-0.540398	41	438
7483	Q14019	23406	COTL1	COTL1	Coactosin-like protein	60	14	171	0.295567	0.27451	0.0210567	0.106625	0	206
10262	P49006	65108	MARCKSL1	MRP	MARCKS-related protein (MARCKS-like protein 1) (Macrophage myristoylated alanine-rich C kinase substrate) (Mac-MARCKS) (MacMARCKS)	66	11	171	0.325123	0.215686	0.109437	0.592052	0	204
11740	Q8IZ83	126133	ALDH16A1	A16A1	Aldehyde dehydrogenase family 16 member A1	57	11	171	0.280788	0.215686	0.0651019	0.380548	54	361
1055	O60716	1500	CTNND1	CTND1	Catenin delta-1 (Cadherin-associated Src substrate) (CAS) (p120 catenin) (p120(ctn)) (p120(cas))	71	13	170	0.349754	0.254902	0.0948517	0.456397	0	255
1515	P02675	2244	FGB	FIBB	Fibrinogen beta chain [Cleaved into: Fibrinopeptide B; Fibrinogen beta chain]	81	17	170	0.399015	0.333333	0.0656814	0.259477	0	389
1677	Q06210	2673	GFPT1	GFPT1	Glutamine--fructose-6-phosphate aminotransferase [isomerizing] 1 (EC 2.6.1.16) (D-fructose-6-phosphate amidotransferase 1) (Glutamine:fructose-6-phosphate amidotransferase 1) (GFAT 1) (GFAT1) (Hexosephosphate aminotransferase 1)	55	17	170	0.270936	0.333333	-0.0623974	-0.299014	15	204
2550	P13796	3936	LCP1	PLSL	Plastin-2 (L-plastin) (LC64P) (Lymphocyte cytosolic protein 1) (LCP-1)	65	24	170	0.320197	0.470588	-0.150391	-0.555505	0	536
3953	P83731	6152	RPL24	RL24	60S ribosomal protein L24 (60S ribosomal protein L30) (Large ribosomal subunit protein eL24)	49	13	170	0.241379	0.254902	-0.0135227	-0.0786404	0	196
4012	P46783	6204	RPS10	RS10	40S ribosomal protein S10 (Small ribosomal subunit protein eS10)	56	8	170	0.275862	0.156863	0.118999	0.814444	0	211
4033	P39019	6223	RPS19	RS19	40S ribosomal protein S19 (Small ribosomal subunit protein eS19)	53	9	170	0.261084	0.176471	0.0846132	0.565085	0	229
5734	O14745	9368	SLC9A3R1	NHRF1	Na(+)/H(+) exchange regulatory cofactor NHE-RF1 (NHERF-1) (Ezrin-radixin-moesin-binding phosphoprotein 50) (EBP50) (Regulatory cofactor of Na(+)/H(+) exchanger) (Sodium-hydrogen exchanger regulatory factor 1) (Solute carrier family 9 isoform A3 regulatory factor 1)	71	15	170	0.349754	0.294118	0.055636	0.249946	0	229
5848	O75351	9525	VPS4B	VPS4B	Vacuolar protein sorting-associated protein 4B (EC 3.6.4.6) (Cell migration-inducing gene 1 protein) (Suppressor of K(+) transport growth defect 1) (Protein SKD1)	72	8	170	0.35468	0.156863	0.197817	1.17701	0	257
6237	P43490	10135	NAMPT	NAMPT	Nicotinamide phosphoribosyltransferase (NAmPRTase) (Nampt) (EC 2.4.2.12) (Pre-B-cell colony-enhancing factor 1) (Pre-B cell-enhancing factor) (Visfatin)	59	12	170	0.29064	0.235294	0.0553463	0.30477	6	225
739	Q16181	989	SEPTIN7	SEPT7	Septin-7 (CDC10 protein homolog)	49	17	169	0.241379	0.333333	-0.091954	-0.465664	0	317
1726	P63096	2770	GNAI1	GNAI1	Guanine nucleotide-binding protein G(i) subunit alpha-1 (Adenylate cyclase-inhibiting G alpha protein)	77	5	169	0.37931	0.0980392	0.281271	1.95195	0	444
2154	P01112	3265	HRAS	RASH	GTPase HRas (H-Ras-1) (Ha-Ras) (Transforming protein p21) (c-H-ras) (p21ras) [Cleaved into: GTPase HRas, N-terminally processed]	55	12	169	0.270936	0.235294	0.0356418	0.203487	0	533
3657	P51665	5713	PSMD7	PSMD7	26S proteasome non-ATPase regulatory subunit 7 (26S proteasome regulatory subunit RPN8) (26S proteasome regulatory subunit S12) (Mov34 protein homolog) (Proteasome subunit p40)	52	13	169	0.256158	0.254902	0.00125567	0.00708942	0	304
1036	P04080	1476	CSTB	CYTB	Cystatin-B (CPI-B) (Liver thiol proteinase inhibitor) (Stefin-B)	55	12	168	0.270936	0.235294	0.0356418	0.203487	0	230
2366	P05106	3690	ITGB3	ITB3	Integrin beta-3 (Platelet membrane glycoprotein IIIa) (GPIIIa) (CD antigen CD61)	79	14	168	0.389163	0.27451	0.114653	0.503515	0	430
3930	P32969	6133	RPL9	RL9	60S ribosomal protein L9 (Large ribosomal subunit protein uL6)	53	13	168	0.261084	0.254902	0.00618178	0.0345702	33	226
3943	Q02543	6142	RPL18A	RL18A	60S ribosomal protein L18a (Large ribosomal subunit protein eL20)	52	12	168	0.256158	0.235294	0.0208635	0.122567	0	228
4039	P62847	6229	RPS24	RS24	40S ribosomal protein S24 (Small ribosomal subunit protein eS24)	44	11	168	0.216749	0.215686	0.00106249	0.00708942	0	214
4850	P26640	7407	VARS1	SYVC	Valine--tRNA ligase (EC 6.1.1.9) (Protein G7a) (Valyl-tRNA synthetase) (ValRS)	48	10	168	0.236453	0.196078	0.0403748	0.270124	12	218
6614	P19105	10627	MYL12A	ML12A	Myosin regulatory light chain 12A (Epididymis secretory protein Li 24) (HEL-S-24) (MLC-2B) (Myosin RLC) (Myosin regulatory light chain 2, nonsarcomeric) (Myosin regulatory light chain MRLC3)	51	13	168	0.251232	0.254902	-0.00367043	-0.020925	0	452
6719	Q9UHD8	10801	SEPTIN9	SEPT9	Septin-9 (MLL septin-like fusion protein MSF-A) (MLL septin-like fusion protein) (Ovarian/Breast septin) (Ov/Br septin) (Septin D1)	49	16	168	0.241379	0.313725	-0.0723462	-0.378201	0	317
1142	O00571	1654	DDX3X	DDX3X	ATP-dependent RNA helicase DDX3X (EC 3.6.4.13) (DEAD box protein 3, X-chromosomal) (DEAD box, X isoform) (Helicase-like protein 2) (HLP2)	53	11	167	0.261084	0.215686	0.0453975	0.275578	0	239
3061	P00491	4860	PNP	PNPH	Purine nucleoside phosphorylase (PNP) (EC 2.4.2.1) (Inosine phosphorylase) (Inosine-guanosine phosphorylase)	59	16	167	0.29064	0.313725	-0.0230851	-0.110268	1	247
13082	Q9UBV8	553115	PEF1	PEF1	Peflin (PEF protein with a long N-terminal hydrophobic domain) (Penta-EF hand domain-containing protein 1)	64	7	167	0.315271	0.137255	0.178016	1.19973	0	364
3931	P27635	6134	RPL10	RL10	60S ribosomal protein L10 (Laminin receptor homolog) (Large ribosomal subunit protein uL16) (Protein QM) (Tumor suppressor QM)	59	11	166	0.29064	0.215686	0.0749541	0.430301	38	235
5410	O75531	8815	BANF1	BAF	Barrier-to-autointegration factor (Breakpoint cluster region protein 1) [Cleaved into: Barrier-to-autointegration factor, N-terminally processed]	53	4	166	0.261084	0.0784314	0.182652	1.73501	0	195
6295	O00487	10213	PSMD14	PSDE	26S proteasome non-ATPase regulatory subunit 14 (EC 3.4.19.-) (26S proteasome regulatory subunit RPN11) (26S proteasome-associated PAD1 homolog 1)	56	9	166	0.275862	0.176471	0.0993915	0.644519	0	304
6517	Q9Y4L1	10525	HYOU1	HYOU1	Hypoxia up-regulated protein 1 (150 kDa oxygen-regulated protein) (ORP-150) (170 kDa glucose-regulated protein) (GRP-170)	47	18	166	0.231527	0.352941	-0.121414	-0.608247	40	568
6521	O95373	10527	IPO7	IPO7	Importin-7 (Imp7) (Ran-binding protein 7) (RanBP7)	56	13	166	0.275862	0.254902	0.0209601	0.114005	0	215
7544	P40429	23521	RPL13A	RL13A	60S ribosomal protein L13a (23 kDa highly basic protein) (Large ribosomal subunit protein uL13)	57	14	166	0.280788	0.27451	0.00627837	0.0326245	30	223
1743	P63092	2778	GNAS	GNAS2	Guanine nucleotide-binding protein G(s) subunit alpha isoforms short (Adenylate cyclase-stimulating G alpha protein)	61	7	165	0.300493	0.137255	0.163238	1.13047	0	339
2121	P52597	3185	HNRNPF	HNRPF	Heterogeneous nuclear ribonucleoprotein F (hnRNP F) (Nucleolin-like protein mcs94-1) [Cleaved into: Heterogeneous nuclear ribonucleoprotein F, N-terminally processed]	53	9	165	0.261084	0.176471	0.0846132	0.565085	0	246
4480	O00186	6814	STXBP3	STXB3	Syntaxin-binding protein 3 (Platelet Sec1 protein) (PSP) (Protein unc-18 homolog 3) (Unc18-3) (Protein unc-18 homolog C) (Unc-18C)	60	14	165	0.295567	0.27451	0.0210567	0.106625	0	293
5306	O00303	8665	EIF3F	EIF3F	Eukaryotic translation initiation factor 3 subunit F (eIF3f) (Deubiquitinating enzyme eIF3f) (EC 3.4.19.12) (Eukaryotic translation initiation factor 3 subunit 5) (eIF-3-epsilon) (eIF3 p47)	47	8	165	0.231527	0.156863	0.0746643	0.561678	0	304
8768	Q9Y376	51719	CAB39	CAB39	Calcium-binding protein 39 (MO25alpha) (Protein Mo25)	72	12	165	0.35468	0.235294	0.119386	0.592052	0	204
10013	Q9HAV0	59345	GNB4	GBB4	Guanine nucleotide-binding protein subunit beta-4 (Transducin beta chain 4)	49	16	165	0.241379	0.313725	-0.0723462	-0.378201	0	431
733	P48509	977	CD151	CD151	CD151 antigen (GP27) (Membrane glycoprotein SFA-1) (Platelet-endothelial tetraspan antigen 3) (PETA-3) (Tetraspanin-24) (Tspan-24) (CD antigen CD151)	58	11	164	0.285714	0.215686	0.070028	0.405639	0	453
1289	P24534	1933	EEF1B2	EF1B	Elongation factor 1-beta (EF-1-beta)	48	12	164	0.236453	0.235294	0.00115908	0.00708942	0	283
1445	P00734	2147	F2	THRB	Prothrombin (EC 3.4.21.5) (Coagulation factor II) [Cleaved into: Activation peptide fragment 1; Activation peptide fragment 2; Thrombin light chain; Thrombin heavy chain]	91	15	164	0.448276	0.294118	0.154158	0.607993	7	514
2487	P08779	3868	KRT16	K1C16	Keratin, type I cytoskeletal 16 (Cytokeratin-16) (CK-16) (Keratin-16) (K16)	62	15	164	0.305419	0.294118	0.0113011	0.0543951	0	343
4015	P25398	6206	RPS12	RS12	40S ribosomal protein S12 (Small ribosomal subunit protein eS12)	53	10	164	0.261084	0.196078	0.0650053	0.413082	0	304
5141	O15400	8417	STX7	STX7	Syntaxin-7	66	8	164	0.325123	0.156863	0.16826	1.05148	0	217
6006	P38919	9775	EIF4A3	IF4A3	Eukaryotic initiation factor 4A-III (eIF-4A-III) (eIF4A-III) (EC 3.6.4.13) (ATP-dependent RNA helicase DDX48) (ATP-dependent RNA helicase eIF4A-3) (DEAD box protein 48) (Eukaryotic initiation factor 4A-like NUK-34) (Eukaryotic translation initiation factor 4A isoform 3) (Nuclear matrix protein 265) (NMP 265) (hNMP 265) [Cleaved into: Eukaryotic initiation factor 4A-III, N-terminally processed]	47	8	164	0.231527	0.156863	0.0746643	0.561678	15	412
6185	O14828	10067	SCAMP3	SCAM3	Secretory carrier-associated membrane protein 3 (Secretory carrier membrane protein 3)	67	7	164	0.330049	0.137255	0.192794	1.26582	0	219
6836	P49755	10972	TMED10	TMEDA	Transmembrane emp24 domain-containing protein 10 (21 kDa transmembrane-trafficking protein) (S31III125) (S31I125) (Tmp-21-I) (Transmembrane protein Tmp21) (p23) (p24 family protein delta-1) (p24delta1) (p24delta)	55	11	164	0.270936	0.215686	0.0552497	0.329018	0	219
8685	Q9NP79	51534	VTA1	VTA1	Vacuolar protein sorting-associated protein VTA1 homolog (Dopamine-responsive gene 1 protein) (DRG-1) (LYST-interacting protein 5) (LIP5) (SKD1-binding protein 1) (SBP1)	75	5	164	0.369458	0.0980392	0.271419	1.91398	0	199
1319	P05198	1965	EIF2S1	IF2A	Eukaryotic translation initiation factor 2 subunit 1 (Eukaryotic translation initiation factor 2 subunit alpha) (eIF-2-alpha) (eIF-2A) (eIF-2alpha)	54	12	163	0.26601	0.235294	0.0307157	0.177014	0	216
1479	P23142	2192	FBLN1	FBLN1	Fibulin-1 (FIBL-1)	66	13	163	0.325123	0.254902	0.0702212	0.351044	0	217
1671	P31150	2664	GDI1	GDIA	Rab GDP dissociation inhibitor alpha (Rab GDI alpha) (Guanosine diphosphate dissociation inhibitor 1) (GDI-1) (Oligophrenin-2) (Protein XAP-4)	71	12	163	0.349754	0.235294	0.11446	0.571874	0	417
2180	P17066	3310	HSPA6	HSP76	Heat shock 70 kDa protein 6 (Heat shock 70 kDa protein B')	48	13	163	0.236453	0.254902	-0.0184488	-0.108388	40	568
3601	P07602	5660	PSAP	SAP	Prosaposin (Proactivator polypeptide) [Cleaved into: Saposin-A (Protein A); Saposin-B-Val; Saposin-B (Cerebroside sulfate activator) (CSAct) (Dispersin) (Sphingolipid activator protein 1) (SAP-1) (Sulfatide/GM1 activator); Saposin-C (A1 activator) (Co-beta-glucosidase) (Glucosylceramidase activator) (Sphingolipid activator protein 2) (SAP-2); Saposin-D (Component C) (Protein C)]	41	11	163	0.20197	0.215686	-0.0137158	-0.0947902	0	216
3644	P43686	5704	PSMC4	PRS6B	26S protease regulatory subunit 6B (26S proteasome AAA-ATPase subunit RPT3) (MB67-interacting protein) (MIP224) (Proteasome 26S subunit ATPase 4) (Tat-binding protein 7) (TBP-7)	52	9	163	0.256158	0.176471	0.079687	0.537604	0	336
3676	P26599	5725	PTBP1	PTBP1	Polypyrimidine tract-binding protein 1 (PTB) (57 kDa RNA-binding protein PPTB-1) (Heterogeneous nuclear ribonucleoprotein I) (hnRNP I)	48	11	163	0.236453	0.215686	0.0207669	0.13262	0	199
4760	Q13885	7280	TUBB2A	TBB2A	Tubulin beta-2A chain (Tubulin beta class IIa)	71	12	163	0.349754	0.235294	0.11446	0.571874	0	544
6408	P04350	10382	TUBB4A	TBB4A	Tubulin beta-4A chain (Tubulin 5 beta) (Tubulin beta-4 chain)	55	7	163	0.270936	0.137255	0.133681	0.981094	0	544
6543	Q13162	10549	PRDX4	PRDX4	Peroxiredoxin-4 (EC 1.11.1.15) (Antioxidant enzyme AOE372) (AOE37-2) (Peroxiredoxin IV) (Prx-IV) (Thioredoxin peroxidase AO372) (Thioredoxin-dependent peroxide reductase A0372)	42	16	163	0.206897	0.313725	-0.106829	-0.600593	41	514
8025	O43633	27243	CHMP2A	CHM2A	Charged multivesicular body protein 2a (Chromatin-modifying protein 2a) (CHMP2a) (Putative breast adenocarcinoma marker BC-2) (Vacuolar protein sorting-associated protein 2-1) (Vps2-1) (hVps2-1)	73	6	163	0.359606	0.117647	0.241959	1.61195	0	241
38	P21399	48	ACO1	ACOC	Cytoplasmic aconitate hydratase (Aconitase) (EC 4.2.1.3) (Citrate hydro-lyase) (Ferritin repressor protein) (Iron regulatory protein 1) (IRP1) (Iron-responsive element-binding protein 1) (IRE-BP 1)	66	11	162	0.325123	0.215686	0.109437	0.592052	26	264
303	P08134	389	RHOC	RHOC	Rho-related GTP-binding protein RhoC (Rho cDNA clone 9) (h9)	51	12	162	0.251232	0.235294	0.0159374	0.0945523	0	533
715	Q08722	961	CD47	CD47	Leukocyte surface antigen CD47 (Antigenic surface determinant protein OA3) (Integrin-associated protein) (IAP) (Protein MER6) (CD antigen CD47)	60	14	162	0.295567	0.27451	0.0210567	0.106625	0	203
1907	P16403	3006	H1-2	H12	Histone H1.2 (Histone H1c) (Histone H1d) (Histone H1s-1)	64	12	162	0.315271	0.235294	0.0799768	0.422127	0	299
2640	P07948	4067	LYN	LYN	Tyrosine-protein kinase Lyn (EC 2.7.10.2) (Lck/Yes-related novel protein tyrosine kinase) (V-yes-1 Yamaguchi sarcoma viral related oncogene homolog) (p53Lyn) (p56Lyn)	60	18	162	0.295567	0.352941	-0.0573747	-0.255945	10	419
3306	P01009	5265	SERPINA1	A1AT	Alpha-1-antitrypsin (Alpha-1 protease inhibitor) (Alpha-1-antiproteinase) (Serpin A1) [Cleaved into: Short peptide from AAT (SPAAT)]	76	15	162	0.374384	0.294118	0.0802666	0.348126	1	505
4096	P49591	6301	SARS1	SYSC	Serine--tRNA ligase, cytoplasmic (EC 6.1.1.11) (Seryl-tRNA synthetase) (SerRS) (Seryl-tRNA(Ser/Sec) synthetase)	54	15	162	0.26601	0.294118	-0.0281078	-0.144914	11	229
4711	P29144	7174	TPP2	TPP2	Tripeptidyl-peptidase 2 (TPP-2) (EC 3.4.14.10) (Tripeptidyl aminopeptidase) (Tripeptidyl-peptidase II) (TPP-II)	53	8	162	0.261084	0.156863	0.104221	0.73501	20	249
6675	Q15185	10728	PTGES3	TEBP	Prostaglandin E synthase 3 (EC 5.3.99.3) (Cytosolic prostaglandin E2 synthase) (cPGES) (Hsp90 co-chaperone) (Progesterone receptor complex p23) (Telomerase-binding protein p23)	53	10	162	0.261084	0.196078	0.0650053	0.413082	0	196
8878	Q9H0E2	54472	TOLLIP	TOLIP	Toll-interacting protein	71	11	162	0.349754	0.215686	0.134067	0.697405	0	208
116	O94973	161	AP2A2	AP2A2	AP-2 complex subunit alpha-2 (100 kDa coated vesicle protein C) (Adaptor protein complex AP-2 subunit alpha-2) (Adaptor-related protein complex 2 subunit alpha-2) (Alpha-adaptin C) (Alpha2-adaptin) (Clathrin assembly protein complex 2 alpha-C large chain) (Huntingtin yeast partner J) (Huntingtin-interacting protein 9) (HIP-9) (Huntingtin-interacting protein J) (Plasma membrane adaptor HA2/AP2 ada…	53	11	161	0.261084	0.215686	0.0453975	0.275578	0	256
210	P05141	292	SLC25A5	ADT2	ADP/ATP translocase 2 (ADP,ATP carrier protein 2) (ADP,ATP carrier protein, fibroblast isoform) (Adenine nucleotide translocator 2) (ANT 2) (Solute carrier family 25 member 5) [Cleaved into: ADP/ATP translocase 2, N-terminally processed]	53	15	161	0.261084	0.294118	-0.0330339	-0.171881	0	227
1422	P10768	2098	ESD	ESTD	S-formylglutathione hydrolase (FGH) (EC 3.1.2.12) (Esterase D) (Methylumbelliferyl-acetate deacetylase) (EC 3.1.1.56)	48	14	161	0.236453	0.27451	-0.0380566	-0.215303	7	208
3157	P43034	5048	PAFAH1B1	LIS1	Platelet-activating factor acetylhydrolase IB subunit alpha (Lissencephaly-1 protein) (LIS-1) (PAF acetylhydrolase 45 kDa subunit) (PAF-AH 45 kDa subunit) (PAF-AH alpha) (PAFAH alpha)	53	14	161	0.261084	0.27451	-0.0134261	-0.072345	0	211
3547	P78527	5591	PRKDC	PRKDC	DNA-dependent protein kinase catalytic subunit (DNA-PK catalytic subunit) (DNA-PKcs) (EC 2.7.11.1) (DNPK1) (p460)	47	13	161	0.231527	0.254902	-0.0233749	-0.138761	0	267
6710	Q9Y2A7	10787	NCKAP1	NCKP1	Nck-associated protein 1 (NAP 1) (Membrane-associated protein HEM-2) (p125Nap1)	66	13	161	0.325123	0.254902	0.0702212	0.351044	0	235
13132	Q71DI3	653604	H3C13	H32	Histone H3.2 (Histone H3/m) (Histone H3/o)	53	4	161	0.261084	0.0784314	0.182652	1.73501	0	487
3908	O75695	6102	RP2	XRP2	Protein XRP2	60	16	160	0.295567	0.313725	-0.018159	-0.08602	0	192
3948	P35268	6146	RPL22	RL22	60S ribosomal protein L22 (EBER-associated protein) (EAP) (Epstein-Barr virus small RNA-associated protein) (Heparin-binding protein HBp15) (Large ribosomal subunit protein eL22)	46	11	160	0.226601	0.215686	0.0109147	0.0712198	0	210
4473	Q12846	6810	STX4	STX4	Syntaxin-4 (Renal carcinoma antigen NY-REN-31)	55	10	160	0.270936	0.196078	0.0748575	0.466521	0	248
5717	P62829	9349	RPL23	RL23	60S ribosomal protein L23 (60S ribosomal protein L17) (Large ribosomal subunit protein uL14)	45	9	160	0.221675	0.176471	0.0452043	0.329018	32	224
8627	Q9Y262	51386	EIF3L	EIF3L	Eukaryotic translation initiation factor 3 subunit L (eIF3l) (Eukaryotic translation initiation factor 3 subunit 6-interacting protein) (Eukaryotic translation initiation factor 3 subunit E-interacting protein)	45	10	160	0.221675	0.196078	0.0255964	0.177014	0	223
11463	Q71UI9	94239	H2AZ2	H2AV	Histone H2A.V (H2A.F/Z)	47	8	160	0.231527	0.156863	0.0746643	0.561678	0	452
649	P50454	871	SERPINH1	SERPH	Serpin H1 (47 kDa heat shock protein) (Arsenic-transactivated protein 3) (AsTP3) (Cell proliferation-inducing gene 14 protein) (Collagen-binding protein) (Colligin) (Rheumatoid arthritis-related antigen RA-A47)	49	17	159	0.241379	0.333333	-0.091954	-0.465664	1	505
991	O75390	1431	CS	CISY	Citrate synthase, mitochondrial (EC 2.3.3.1) (Citrate (Si)-synthase)	42	19	159	0.206897	0.372549	-0.165652	-0.848521	34	359
2524	P07942	3912	LAMB1	LAMB1	Laminin subunit beta-1 (Laminin B1 chain) (Laminin-1 subunit beta) (Laminin-10 subunit beta) (Laminin-12 subunit beta) (Laminin-2 subunit beta) (Laminin-6 subunit beta) (Laminin-8 subunit beta)	55	8	159	0.270936	0.156863	0.114073	0.788449	0	241
3983	P05386	6176	RPLP1	RLA1	60S acidic ribosomal protein P1 (Large ribosomal subunit protein P1)	46	10	159	0.226601	0.196078	0.0305226	0.208723	0	296
4355	Q00796	6652	SORD	DHSO	Sorbitol dehydrogenase (EC 1.1.1.14) (L-iditol 2-dehydrogenase)	65	10	159	0.320197	0.196078	0.124119	0.707529	15	185
8675	Q9NZZ3	51510	CHMP5	CHMP5	Charged multivesicular body protein 5 (Chromatin-modifying protein 5) (SNF7 domain-containing protein 2) (Vacuolar protein sorting-associated protein 60) (Vps60) (hVps60)	67	4	159	0.330049	0.0784314	0.251618	2.07318	0	202
9962	Q9Y3L5	57826	RAP2C	RAP2C	Ras-related protein Rap-2c	51	5	159	0.251232	0.0980392	0.153192	1.35759	0	533
1227	P27487	1803	DPP4	DPP4	Dipeptidyl peptidase 4 (EC 3.4.14.5) (ADABP) (Adenosine deaminase complexing protein 2) (ADCP-2) (Dipeptidyl peptidase IV) (DPP IV) (T-cell activation antigen CD26) (TP103) (CD antigen CD26) [Cleaved into: Dipeptidyl peptidase 4 membrane form (Dipeptidyl peptidase IV membrane form); Dipeptidyl peptidase 4 soluble form (Dipeptidyl peptidase IV soluble form)]	73	13	158	0.359606	0.254902	0.104704	0.496474	9	293
2210	P41252	3376	IARS1	SYIC	Isoleucine--tRNA ligase, cytoplasmic (EC 6.1.1.5) (Isoleucyl-tRNA synthetase) (IRS) (IleRS)	47	13	158	0.231527	0.254902	-0.0233749	-0.138761	16	223
2368	P56537	3692	EIF6	IF6	Eukaryotic translation initiation factor 6 (eIF-6) (B(2)GCN homolog) (B4 integrin interactor) (CAB) (p27(BBP))	53	9	158	0.261084	0.176471	0.0846132	0.565085	0	183
3031	P14543	4811	NID1	NID1	Nidogen-1 (NID-1) (Entactin)	75	8	158	0.369458	0.156863	0.212595	1.23591	0	175
6199	O15511	10092	ARPC5	ARPC5	Actin-related protein 2/3 complex subunit 5 (Arp2/3 complex 16 kDa subunit) (p16-ARC)	39	12	158	0.192118	0.235294	-0.0431759	-0.292471	0	216
8454	Q9Y315	51071	DERA	DEOC	Deoxyribose-phosphate aldolase (DERA) (EC 4.1.2.4) (2-deoxy-D-ribose 5-phosphate aldolase) (Phosphodeoxyriboaldolase) (Deoxyriboaldolase)	44	8	158	0.216749	0.156863	0.059886	0.466521	6	183
10710	P39060	80781	COL18A1	COIA1	Collagen alpha-1(XVIII) chain [Cleaved into: Endostatin]	62	10	158	0.305419	0.196078	0.10934	0.639358	0	206
10777	Q8NG11	81619	TSPAN14	TSN14	Tetraspanin-14 (Tspan-14) (DC-TM4F2) (Transmembrane 4 superfamily member 14)	54	6	158	0.26601	0.117647	0.148363	1.17701	0	453
795	Q9Y281	1073	CFL2	COF2	Cofilin-2 (Cofilin, muscle isoform)	58	9	157	0.285714	0.176471	0.109244	0.695145	0	470
2176	P54652	3306	HSPA2	HSP72	Heat shock-related 70 kDa protein 2 (Heat shock 70 kDa protein 2)	65	8	157	0.320197	0.156863	0.163334	1.02946	40	568
2244	P11717	3482	IGF2R	MPRI	Cation-independent mannose-6-phosphate receptor (CI Man-6-P receptor) (CI-MPR) (M6PR) (300 kDa mannose 6-phosphate receptor) (MPR 300) (Insulin-like growth factor 2 receptor) (Insulin-like growth factor II receptor) (IGF-II receptor) (M6P/IGF2 receptor) (M6P/IGF2R) (CD antigen CD222)	62	12	157	0.305419	0.235294	0.0701246	0.376323	0	202
3754	P06737	5836	PYGL	PYGL	Glycogen phosphorylase, liver form (EC 2.4.1.1)	52	16	157	0.256158	0.313725	-0.0575679	-0.292471	11	286
4038	P62266	6228	RPS23	RS23	40S ribosomal protein S23 (Small ribosomal subunit protein uS12)	51	10	157	0.251232	0.196078	0.0551531	0.357587	16	204
5372	P62491	8766	RAB11A	RB11A	Ras-related protein Rab-11A (Rab-11) (YL8)	57	18	157	0.280788	0.352941	-0.072153	-0.329946	0	533
535	P02748	735	C9	CO9	Complement component C9 [Cleaved into: Complement component C9a; Complement component C9b]	90	17	156	0.44335	0.333333	0.110016	0.41148	0	174
571	P27708	790	CAD	PYR1	CAD protein [Includes: Glutamine-dependent carbamoyl-phosphate synthase (EC 6.3.5.5); Aspartate carbamoyltransferase (EC 2.1.3.2); Dihydroorotase (EC 3.5.2.3)]	47	13	156	0.231527	0.254902	-0.0233749	-0.138761	22	223
2173	P0DMV8	3303	HSPA1A	HS71A	Heat shock 70 kDa protein 1A (Heat shock 70 kDa protein 1) (HSP70-1) (HSP70.1)	93	12	156	0.458128	0.235294	0.222834	0.961286	0	156
2938	P52272	4670	HNRNPM	HNRPM	Heterogeneous nuclear ribonucleoprotein M (hnRNP M)	47	10	156	0.231527	0.196078	0.0354487	0.23975	2	346
2944	O43776	4677	NARS1	SYNC	Asparagine--tRNA ligase, cytoplasmic (EC 6.1.1.22) (Asparaginyl-tRNA synthetase) (AsnRS)	48	12	156	0.236453	0.235294	0.00115908	0.00708942	19	284
3467	P62140	5500	PPP1CB	PP1B	Serine/threonine-protein phosphatase PP1-beta catalytic subunit (PP-1B) (PPP1CD) (EC 3.1.3.16) (EC 3.1.3.53)	50	10	156	0.246305	0.196078	0.050227	0.329018	0	299
4077	P60903	6281	S100A10	S10AA	Protein S100-A10 (Calpactin I light chain) (Calpactin-1 light chain) (Cellular ligand of annexin II) (S100 calcium-binding protein A10) (p10 protein) (p11)	41	14	156	0.20197	0.27451	-0.0725394	-0.442713	0	187
4603	P21980	7052	TGM2	TGM2	Protein-glutamine gamma-glutamyltransferase 2 (EC 2.3.2.13) (Tissue transglutaminase) (Transglutaminase C) (TG(C)) (TGC) (TGase C) (Transglutaminase H) (TGase H) (Transglutaminase-2) (TGase-2)	54	13	156	0.26601	0.254902	0.0111079	0.0615372	0	308
4762	P49411	7284	TUFM	EFTU	Elongation factor Tu, mitochondrial (EF-Tu) (P43)	41	12	156	0.20197	0.235294	-0.0333237	-0.220321	62	175
4865	P45880	7417	VDAC2	VDAC2	Voltage-dependent anion-selective channel protein 2 (VDAC-2) (hVDAC2) (Outer mitochondrial membrane protein porin 2)	46	14	156	0.226601	0.27451	-0.0479088	-0.276704	0	246
5302	Q99613	8663	EIF3C	EIF3C	Eukaryotic translation initiation factor 3 subunit C (eIF3c) (Eukaryotic translation initiation factor 3 subunit 8) (eIF3 p110)	49	12	156	0.241379	0.235294	0.00608519	0.0368368	0	210
9334	Q96FW1	55611	OTUB1	OTUB1	Ubiquitin thioesterase OTUB1 (EC 3.4.19.12) (Deubiquitinating enzyme OTUB1) (OTU domain-containing ubiquitin aldehyde-binding protein 1) (Otubain-1) (hOTU1) (Ubiquitin-specific-processing protease OTUB1)	52	14	156	0.256158	0.27451	-0.0183522	-0.0998258	0	206
291	P84085	381	ARF5	ARF5	ADP-ribosylation factor 5	46	13	155	0.226601	0.254902	-0.028301	-0.169788	0	533
466	P30043	645	BLVRB	BLVRB	Flavin reductase (NADPH) (FR) (EC 1.5.1.30) (Biliverdin reductase B) (BVR-B) (EC 1.3.1.24) (Biliverdin-IX beta-reductase) (Green heme-binding protein) (GHBP) (NADPH-dependent diaphorase) (NADPH-flavin reductase) (FLR)	51	8	155	0.251232	0.156863	0.0943688	0.679515	0	177
1514	P02671	2243	FGA	FIBA	Fibrinogen alpha chain [Cleaved into: Fibrinopeptide A; Fibrinogen alpha chain]	76	16	155	0.374384	0.313725	0.0606587	0.255017	0	389
1529	P02679	2266	FGG	FIBG	Fibrinogen gamma chain	77	16	155	0.37931	0.313725	0.0655849	0.273876	0	389
2212	P05362	3383	ICAM1	ICAM1	Intercellular adhesion molecule 1 (ICAM-1) (Major group rhinovirus receptor) (CD antigen CD54)	60	5	155	0.295567	0.0980392	0.197527	1.59205	0	219
2304	Q12905	3608	ILF2	ILF2	Interleukin enhancer-binding factor 2 (Nuclear factor of activated T-cells 45 kDa)	41	13	155	0.20197	0.254902	-0.0529315	-0.335798	0	184
2350	P08648	3678	ITGA5	ITA5	Integrin alpha-5 (CD49 antigen-like family member E) (Fibronectin receptor subunit alpha) (Integrin alpha-F) (VLA-5) (CD antigen CD49e) [Cleaved into: Integrin alpha-5 heavy chain; Integrin alpha-5 light chain]	55	12	155	0.270936	0.235294	0.0356418	0.203487	0	301
2376	P19823	3698	ITIH2	ITIH2	Inter-alpha-trypsin inhibitor heavy chain H2 (ITI heavy chain H2) (ITI-HC2) (Inter-alpha-inhibitor heavy chain 2) (Inter-alpha-trypsin inhibitor complex component II) (Serum-derived hyaluronan-associated protein) (SHAP)	88	11	155	0.433498	0.215686	0.217811	1.00709	4	296
2403	P27701	3732	CD82	CD82	CD82 antigen (C33 antigen) (IA4) (Inducible membrane protein R2) (Metastasis suppressor Kangai-1) (Suppressor of tumorigenicity 6 protein) (Tetraspanin-27) (Tspan-27) (CD antigen CD82)	61	9	155	0.300493	0.176471	0.124022	0.767902	0	453
2541	Q14847	3927	LASP1	LASP1	LIM and SH3 domain protein 1 (LASP-1) (Metastatic lymph node gene 50 protein) (MLN 50)	47	9	155	0.231527	0.176471	0.0550565	0.391753	0	193
3384	Q02809	5351	PLOD1	PLOD1	Procollagen-lysine,2-oxoglutarate 5-dioxygenase 1 (EC 1.14.11.4) (Lysyl hydroxylase 1) (LH1)	49	14	155	0.241379	0.27451	-0.0331305	-0.185556	0	231
3987	P04843	6184	RPN1	RPN1	Dolichyl-diphosphooligosaccharide--protein glycosyltransferase subunit 1 (Dolichyl-diphosphooligosaccharide--protein glycosyltransferase 67 kDa subunit) (Ribophorin I) (RPN-I) (Ribophorin-1)	55	12	155	0.270936	0.235294	0.0356418	0.203487	0	204
4714	P13693	7178	TPT1	TCTP	Translationally-controlled tumor protein (TCTP) (Fortilin) (Histamine-releasing factor) (HRF) (p23)	50	11	155	0.246305	0.215686	0.0306191	0.191514	0	214
7003	Q9BUL8	11235	PDCD10	PDC10	Programmed cell death protein 10 (Cerebral cavernous malformations 3 protein) (TF-1 cell apoptosis-related protein 15)	62	11	155	0.305419	0.215686	0.0897324	0.501854	0	179
7506	Q15393	23450	SF3B3	SF3B3	Splicing factor 3B subunit 3 (Pre-mRNA-splicing factor SF3b 130 kDa subunit) (SF3b130) (STAF130) (Spliceosome-associated protein 130) (SAP 130)	47	12	155	0.231527	0.235294	-0.00376702	-0.0232842	0	185
1469	O60488	2182	ACSL4	ACSL4	Long-chain-fatty-acid--CoA ligase 4 (EC 6.2.1.3) (Long-chain acyl-CoA synthetase 4) (LACS 4)	57	10	154	0.280788	0.196078	0.0847097	0.518051	1	250
3553	P28482	5594	MAPK1	MK01	Mitogen-activated protein kinase 1 (MAP kinase 1) (MAPK 1) (EC 2.7.11.24) (ERT1) (Extracellular signal-regulated kinase 2) (ERK-2) (MAP kinase isoform p42) (p42-MAPK) (Mitogen-activated protein kinase 2) (MAP kinase 2) (MAPK 2)	56	13	154	0.275862	0.254902	0.0209601	0.114005	0	222
3960	P46776	6157	RPL27A	RL27A	60S ribosomal protein L27a (Large ribosomal subunit protein uL15)	40	10	154	0.197044	0.196078	0.000965904	0.00708942	34	219
3970	P18077	6165	RPL35A	RL35A	60S ribosomal protein L35a (Cell growth-inhibiting gene 33 protein) (Large ribosomal subunit protein eL33)	47	8	154	0.231527	0.156863	0.0746643	0.561678	0	190
4222	P43007	6509	SLC1A4	SATT	Neutral amino acid transporter A (Alanine/serine/cysteine/threonine transporter 1) (ASCT-1) (SATT) (Solute carrier family 1 member 4)	55	12	154	0.270936	0.235294	0.0356418	0.203487	6	340
11418	Q96EY5	93343	MVB12A	MB12A	Multivesicular body subunit 12A (CIN85/CD2AP family-binding protein) (ESCRT-I complex subunit MVB12A) (Protein FAM125A)	64	4	154	0.315271	0.0784314	0.23684	2.00709	0	196
31	Q9BWD1	39	ACAT2	THIC	Acetyl-CoA acetyltransferase, cytosolic (EC 2.3.1.9) (Acetyl-CoA transferase-like protein) (Cytosolic acetoacetyl-CoA thiolase)	52	15	153	0.256158	0.294118	-0.03796	-0.199361	29	271
117	Q10567	162	AP1B1	AP1B1	AP-1 complex subunit beta-1 (Adaptor protein complex AP-1 subunit beta-1) (Adaptor-related protein complex 1 subunit beta-1) (Beta-1-adaptin) (Beta-adaptin 1) (Clathrin assembly protein complex 1 beta large chain) (Golgi adaptor HA1/AP1 adaptin beta subunit)	46	16	153	0.226601	0.313725	-0.0871245	-0.469349	0	318
866	P09496	1211	CLTA	CLCA	Clathrin light chain A (Lca)	50	5	153	0.246305	0.0980392	0.148266	1.32902	0	196
1448	P12259	2153	F5	FA5	Coagulation factor V (Activated protein C cofactor) (Proaccelerin, labile factor) [Cleaved into: Coagulation factor V heavy chain; Coagulation factor V light chain]	79	15	153	0.389163	0.294118	0.0950449	0.40398	0	191
1648	P22102	2618	GART	PUR2	Trifunctional purine biosynthetic protein adenosine-3 [Includes: Phosphoribosylamine--glycine ligase (EC 6.3.4.13) (Glycinamide ribonucleotide synthetase) (GARS) (Phosphoribosylglycinamide synthetase); Phosphoribosylformylglycinamidine cyclo-ligase (EC 6.3.3.1) (AIR synthase) (AIRS) (Phosphoribosyl-aminoimidazole synthetase); Phosphoribosylglycinamide formyltransferase (EC 2.1.2.2) (5'-phosphorib…	55	11	153	0.270936	0.215686	0.0552497	0.329018	3	195
2693	P31153	4144	MAT2A	METK2	S-adenosylmethionine synthase isoform type-2 (AdoMet synthase 2) (EC 2.5.1.6) (Methionine adenosyltransferase 2) (MAT 2) (Methionine adenosyltransferase II) (MAT-II)	53	12	153	0.261084	0.235294	0.0257896	0.150047	27	194
3965	P62899	6160	RPL31	RL31	60S ribosomal protein L31 (Large ribosomal subunit protein eL31)	49	14	153	0.241379	0.27451	-0.0331305	-0.185556	0	197
6823	Q12907	10960	LMAN2	LMAN2	Vesicular integral-membrane protein VIP36 (Glycoprotein GP36b) (Lectin mannose-binding 2) (Vesicular integral-membrane protein 36) (VIP36)	55	16	153	0.270936	0.313725	-0.0427895	-0.211551	0	179
7045	O00154	11332	ACOT7	BACH	Cytosolic acyl coenzyme A thioester hydrolase (EC 3.1.2.2) (Acyl-CoA thioesterase 7) (Brain acyl-CoA hydrolase) (BACH) (CTE-IIa) (CTE-II) (Long chain acyl-CoA thioester hydrolase)	51	11	153	0.251232	0.215686	0.0355453	0.220083	1	182
840	Q96CW1	1173	AP2M1	AP2M1	AP-2 complex subunit mu (AP-2 mu chain) (Adaptin-mu2) (Adaptor protein complex AP-2 subunit mu) (Adaptor-related protein complex 2 subunit mu) (Clathrin assembly protein complex 2 mu medium chain) (Clathrin coat assembly protein AP50) (Clathrin coat-associated protein AP50) (HA2 50 kDa subunit) (Plasma membrane adaptor AP-2 50 kDa protein)	55	7	152	0.270936	0.137255	0.133681	0.981094	0	223
2461	P01116	3845	KRAS	RASK	GTPase KRas (K-Ras 2) (Ki-Ras) (c-K-ras) (c-Ki-ras) [Cleaved into: GTPase KRas, N-terminally processed]	61	7	152	0.300493	0.137255	0.163238	1.13047	0	533
2690	P56192	4141	MARS1	SYMC	Methionine--tRNA ligase, cytoplasmic (EC 6.1.1.10) (Methionyl-tRNA synthetase) (MetRS)	54	8	152	0.26601	0.156863	0.109147	0.761977	1	195
6514	Q92841	10521	DDX17	DDX17	Probable ATP-dependent RNA helicase DDX17 (EC 3.6.4.13) (DEAD box protein 17) (DEAD box protein p72) (DEAD box protein p82) (RNA-dependent helicase p72)	52	9	152	0.256158	0.176471	0.079687	0.537604	15	412
7447	Q5T4S7	23352	UBR4	UBR4	E3 ubiquitin-protein ligase UBR4 (EC 2.3.2.27) (600 kDa retinoblastoma protein-associated factor) (N-recognin-4) (RING-type E3 ubiquitin transferase UBR4) (Retinoblastoma-associated factor of 600 kDa) (RBAF600) (p600) (Zinc finger UBR1-type protein 1)	51	8	152	0.251232	0.156863	0.0943688	0.679515	0	183
10678	Q5ZPR3	80381	CD276	CD276	CD276 antigen (4Ig-B7-H3) (B7 homolog 3) (B7-H3) (Costimulatory molecule) (CD antigen CD276)	54	5	152	0.26601	0.0980392	0.167971	1.44005	0	170
1288	Q05639	1917	EEF1A2	EF1A2	Elongation factor 1-alpha 2 (EF-1-alpha-2) (Eukaryotic elongation factor 1 A-2) (eEF1A-2) (Statin-S1)	53	12	151	0.261084	0.235294	0.0257896	0.150047	0	511
2122	P31943	3187	HNRNPH1	HNRH1	Heterogeneous nuclear ribonucleoprotein H (hnRNP H) [Cleaved into: Heterogeneous nuclear ribonucleoprotein H, N-terminally processed]	38	11	151	0.187192	0.215686	-0.0284942	-0.204415	0	246
3159	P68402	5049	PAFAH1B2	PA1B2	Platelet-activating factor acetylhydrolase IB subunit beta (EC 3.1.1.47) (PAF acetylhydrolase 30 kDa subunit) (PAF-AH 30 kDa subunit) (PAF-AH subunit beta) (PAFAH subunit beta)	56	12	151	0.275862	0.235294	0.040568	0.229482	0	193
5310	Q13347	8668	EIF3I	EIF3I	Eukaryotic translation initiation factor 3 subunit I (eIF3i) (Eukaryotic translation initiation factor 3 subunit 2) (TGF-beta receptor-interacting protein 1) (TRIP-1) (eIF-3-beta) (eIF3 p36)	48	12	151	0.236453	0.235294	0.00115908	0.00708942	0	196
9421	Q9NVA2	55752	SEPTIN11	SEP11	Septin-11	46	6	151	0.226601	0.117647	0.108954	0.945689	0	317
105	P09874	142	PARP1	PARP1	Poly [ADP-ribose] polymerase 1 (PARP-1) (EC 2.4.2.30) (ADP-ribosyltransferase diphtheria toxin-like 1) (ARTD1) (NAD(+) ADP-ribosyltransferase 1) (ADPRT 1) (Poly[ADP-ribose] synthase 1)	53	10	150	0.261084	0.196078	0.0650053	0.413082	0	217
636	P04040	847	CAT	CATA	Catalase (EC 1.11.1.6)	61	12	150	0.300493	0.235294	0.0651985	0.352864	27	200
2650	P20645	4074	M6PR	MPRD	Cation-dependent mannose-6-phosphate receptor (CD Man-6-P receptor) (CD-MPR) (46 kDa mannose 6-phosphate receptor) (MPR 46)	50	4	150	0.246305	0.0784314	0.167874	1.65095	0	189
2826	O43795	4430	MYO1B	MYO1B	Unconventional myosin-Ib (MYH-1c) (Myosin I alpha) (MMI-alpha) (MMIa)	59	13	150	0.29064	0.254902	0.0357384	0.189293	0	508
3475	P67775	5515	PPP2CA	PP2AA	Serine/threonine-protein phosphatase 2A catalytic subunit alpha isoform (PP2A-alpha) (EC 3.1.3.16) (Replication protein C) (RP-C)	40	9	150	0.197044	0.176471	0.0205737	0.159093	1	271
3947	P46778	6144	RPL21	RL21	60S ribosomal protein L21 (Large ribosomal subunit protein eL21)	51	11	150	0.251232	0.215686	0.0355453	0.220083	0	193
3951	P62750	6147	RPL23A	RL23A	60S ribosomal protein L23a (Large ribosomal subunit protein uL23)	49	11	150	0.241379	0.215686	0.025693	0.162368	25	187
6824	P30040	10961	ERP29	ERP29	Endoplasmic reticulum resident protein 29 (ERp29) (Endoplasmic reticulum resident protein 28) (ERp28) (Endoplasmic reticulum resident protein 31) (ERp31)	39	16	150	0.192118	0.313725	-0.121607	-0.707508	0	168
6964	Q9Y3F4	11171	STRAP	STRAP	Serine-threonine kinase receptor-associated protein (MAP activator with WD repeats) (UNR-interacting protein) (WD-40 repeat protein PT-WD)	51	10	150	0.251232	0.196078	0.0551531	0.357587	0	182
2269	P01834	3514	#N/A	IGKC	Immunoglobulin kappa constant (Ig kappa chain C region) (Ig kappa chain C region AG) (Ig kappa chain C region CUM) (Ig kappa chain C region EU) (Ig kappa chain C region OU) (Ig kappa chain C region ROY) (Ig kappa chain C region TI)	71	12	149	0.349754	0.235294	0.11446	0.571874	0	151
2332	P60228	3646	EIF3E	EIF3E	Eukaryotic translation initiation factor 3 subunit E (eIF3e) (Eukaryotic translation initiation factor 3 subunit 6) (Viral integration site protein INT-6 homolog) (eIF-3 p48)	47	7	149	0.231527	0.137255	0.0942722	0.754323	0	199
4921	P07947	7525	YES1	YES	Tyrosine-protein kinase Yes (EC 2.7.10.2) (Proto-oncogene c-Yes) (p61-Yes)	52	7	149	0.256158	0.137255	0.118903	0.900174	10	419
5574	P54578	9097	USP14	UBP14	Ubiquitin carboxyl-terminal hydrolase 14 (EC 3.4.19.12) (Deubiquitinating enzyme 14) (Ubiquitin thioesterase 14) (Ubiquitin-specific-processing protease 14)	49	10	149	0.241379	0.196078	0.0453009	0.299871	0	189
5869	O75396	9554	SEC22B	SC22B	Vesicle-trafficking protein SEC22b (ER-Golgi SNARE of 24 kDa) (ERS-24) (ERS24) (SEC22 vesicle-trafficking protein homolog B) (SEC22 vesicle-trafficking protein-like 1)	44	10	149	0.216749	0.196078	0.0206703	0.144593	0	297
6312	O43390	10236	HNRNPR	HNRPR	Heterogeneous nuclear ribonucleoprotein R (hnRNP R)	36	11	149	0.17734	0.215686	-0.0383464	-0.282417	0	233
7010	Q9UNF0	11252	PACSIN2	PACN2	Protein kinase C and casein kinase substrate in neurons protein 2 (Syndapin-2) (Syndapin-II)	55	5	149	0.270936	0.0980392	0.172897	1.46652	0	230
11399	Q8N5I2	92714	ARRDC1	ARRD1	Arrestin domain-containing protein 1	64	5	149	0.315271	0.0980392	0.217232	1.68516	0	190
13068	Q6S8J3	445582	POTEE	POTEE	POTE ankyrin domain family member E (ANKRD26-like family C member 1A) (Prostate, ovary, testis-expressed protein on chromosome 2) (POTE-2)	30	10	149	0.147783	0.196078	-0.0482952	-0.407948	5	373
908	P12111	1293	COL6A3	CO6A3	Collagen alpha-3(VI) chain	65	6	148	0.320197	0.117647	0.20255	1.44449	0	164
1216	P50570	1785	DNM2	DYN2	Dynamin-2 (EC 3.6.5.5)	55	15	148	0.270936	0.294118	-0.0231817	-0.118441	1	266
1916	P16104	3014	H2AX	H2AX	Histone H2AX (H2a/x) (Histone H2A.X)	47	7	148	0.231527	0.137255	0.0942722	0.754323	0	452
2369	P18084	3693	ITGB5	ITB5	Integrin beta-5	50	8	148	0.246305	0.156863	0.0894427	0.650946	0	430
3901	P61221	6059	ABCE1	ABCE1	ATP-binding cassette sub-family E member 1 (2'-5'-oligoadenylate-binding protein) (HuHP68) (RNase L inhibitor) (Ribonuclease 4 inhibitor) (RNS4I)	50	8	148	0.246305	0.156863	0.0894427	0.650946	0	180
4160	P23246	6421	SFPQ	SFPQ	Splicing factor, proline- and glutamine-rich (100 kDa DNA-pairing protein) (hPOMp100) (DNA-binding p52/p100 complex, 100 kDa subunit) (Polypyrimidine tract-binding protein-associated-splicing factor) (PSF) (PTB-associated-splicing factor)	40	9	148	0.197044	0.176471	0.0205737	0.159093	0	218
8677	Q9P2J5	51520	LARS1	SYLC	Leucine--tRNA ligase, cytoplasmic (EC 6.1.1.4) (Leucyl-tRNA synthetase) (LeuRS)	43	9	148	0.211823	0.176471	0.0353521	0.263429	12	199
11861	Q6YHK3	135228	CD109	CD109	CD109 antigen (150 kDa TGF-beta-1-binding protein) (C3 and PZP-like alpha-2-macroglobulin domain-containing protein 7) (Platelet-specific Gov antigen) (p180) (r150) (CD antigen CD109)	45	8	148	0.221675	0.156863	0.0648121	0.498943	11	304
2644	P61626	4069	LYZ	LYSC	Lysozyme C (EC 3.2.1.17) (1,4-beta-N-acetylmuramidase C)	47	20	147	0.231527	0.392157	-0.16063	-0.76025	0	171
4334	P62318	6634	SNRPD3	SMD3	Small nuclear ribonucleoprotein Sm D3 (Sm-D3) (snRNP core protein D3)	45	8	147	0.221675	0.156863	0.0648121	0.498943	0	249
9715	Q9HDC9	57136	APMAP	APMAP	Adipocyte plasma membrane-associated protein (Protein BSCv)	43	15	147	0.211823	0.294118	-0.082295	-0.473536	7	195
829	P12277	1152	CKB	KCRB	Creatine kinase B-type (EC 2.7.3.2) (B-CK) (Creatine kinase B chain)	77	8	146	0.37931	0.156863	0.222448	1.27388	0	230
2140	P00738	3240	HP	HPT	Haptoglobin (Zonulin) [Cleaved into: Haptoglobin alpha chain; Haptoglobin beta chain]	71	17	146	0.349754	0.333333	0.0164204	0.0693737	7	514
2198	P61604	3336	HSPE1	CH10	10 kDa heat shock protein, mitochondrial (Hsp10) (10 kDa chaperonin) (Chaperonin 10) (CPN10) (Early-pregnancy factor) (EPF)	32	10	146	0.157635	0.196078	-0.038443	-0.314839	19	179
2404	Q15046	3735	KARS1	SYK	Lysine--tRNA ligase (EC 6.1.1.6) (Lysyl-tRNA synthetase) (LysRS)	43	9	146	0.211823	0.176471	0.0353521	0.263429	16	173
2456	Q92973	3842	TNPO1	TNPO1	Transportin-1 (Importin beta-2) (Karyopherin beta-2) (M9 region interaction protein) (MIP)	50	13	146	0.246305	0.254902	-0.00859654	-0.0494941	0	182
2608	Q07954	4035	LRP1	LRP1	Prolow-density lipoprotein receptor-related protein 1 (LRP-1) (Alpha-2-macroglobulin receptor) (A2MR) (Apolipoprotein E receptor) (APOER) (CD antigen CD91) [Cleaved into: Low-density lipoprotein receptor-related protein 1 85 kDa subunit (LRP-85); Low-density lipoprotein receptor-related protein 1 515 kDa subunit (LRP-515); Low-density lipoprotein receptor-related protein 1 intracellular domain (L…	68	9	146	0.334975	0.176471	0.158505	0.924627	0	252
2943	Q99733	4676	NAP1L4	NP1L4	Nucleosome assembly protein 1-like 4 (Nucleosome assembly protein 2) (NAP-2)	43	10	146	0.211823	0.196078	0.0157442	0.111426	0	262
3202	P12004	5111	PCNA	PCNA	Proliferating cell nuclear antigen (PCNA) (Cyclin)	45	12	146	0.221675	0.235294	-0.0136192	-0.08602	17	184
4029	P08708	6218	RPS17	RS17	40S ribosomal protein S17 (Small ribosomal subunit protein eS17)	37	8	146	0.182266	0.156863	0.0254033	0.216543	0	204
260	P02656	345	APOC3	APOC3	Apolipoprotein C-III (Apo-CIII) (ApoC-III) (Apolipoprotein C3)	52	11	145	0.256158	0.215686	0.0404714	0.248098	0	174
731	P48960	976	ADGRE5	CD97	CD97 antigen (Leukocyte antigen CD97) (CD antigen CD97) [Cleaved into: CD97 antigen subunit alpha; CD97 antigen subunit beta]	43	12	145	0.211823	0.235294	-0.0234715	-0.151608	0	254
1541	P62942	2280	FKBP1A	FKB1A	Peptidyl-prolyl cis-trans isomerase FKBP1A (PPIase FKBP1A) (EC 5.2.1.8) (12 kDa FK506-binding protein) (12 kDa FKBP) (FKBP-12) (Calstabin-1) (FK506-binding protein 1A) (FKBP-1A) (Immunophilin FKBP12) (Rotamase)	47	7	145	0.231527	0.137255	0.0942722	0.754323	44	278
3297	P35232	5245	PHB	PHB	Prohibitin	37	13	145	0.182266	0.254902	-0.072636	-0.483897	34	413
6420	Q92597	10397	NDRG1	NDRG1	Protein NDRG1 (Differentiation-related gene 1 protein) (DRG-1) (N-myc downstream-regulated gene 1 protein) (Nickel-specific induction protein Cap43) (Reducing agents and tunicamycin-responsive protein) (RTP) (Rit42)	57	10	145	0.280788	0.196078	0.0847097	0.518051	0	209
8404	Q9Y624	50848	F11R	JAM1	Junctional adhesion molecule A (JAM-A) (Junctional adhesion molecule 1) (JAM-1) (Platelet F11 receptor) (Platelet adhesion molecule 1) (PAM-1) (CD antigen CD321)	55	8	145	0.270936	0.156863	0.114073	0.788449	0	183
247	P13798	327	APEH	ACPH	Acylamino-acid-releasing enzyme (AARE) (EC 3.4.19.1) (Acyl-peptide hydrolase) (APH) (Acylaminoacyl-peptidase) (Oxidized protein hydrolase) (OPH)	50	8	144	0.246305	0.156863	0.0894427	0.650946	9	293
3529	P13861	5576	PRKAR2A	KAP2	cAMP-dependent protein kinase type II-alpha regulatory subunit	50	11	144	0.246305	0.215686	0.0306191	0.191514	11	238
3758	P47897	5859	QARS1	SYQ	Glutamine--tRNA ligase (EC 6.1.1.18) (Glutaminyl-tRNA synthetase) (GlnRS)	45	11	144	0.221675	0.215686	0.0059886	0.0395109	12	246
4772	Q16881	7296	TXNRD1	TRXR1	Thioredoxin reductase 1, cytoplasmic (TR) (EC 1.8.1.9) (Gene associated with retinoic and interferon-induced mortality 12 protein) (GRIM-12) (Gene associated with retinoic and IFN-induced mortality 12 protein) (KM-102-derived reductase-like factor) (Thioredoxin reductase TR1)	34	16	144	0.167488	0.313725	-0.146238	-0.905448	49	253
5121	P68431	8357	H3C10	H31	Histone H3.1 (Histone H3/a) (Histone H3/b) (Histone H3/c) (Histone H3/d) (Histone H3/f) (Histone H3/h) (Histone H3/i) (Histone H3/j) (Histone H3/k) (Histone H3/l)	58	6	144	0.285714	0.117647	0.168067	1.28011	0	487
5528	O95297	9019	MPZL1	MPZL1	Myelin protein zero-like protein 1 (Protein zero-related)	56	5	144	0.275862	0.0980392	0.177823	1.49252	0	160
6180	O00429	10059	DNM1L	DNM1L	Dynamin-1-like protein (EC 3.6.5.5) (Dnm1p/Vps1p-like protein) (DVLP) (Dynamin family member proline-rich carboxyl-terminal domain less) (Dymple) (Dynamin-like protein) (Dynamin-like protein 4) (Dynamin-like protein IV) (HdynIV) (Dynamin-related protein 1)	46	8	144	0.226601	0.156863	0.0697382	0.530651	1	266
6945	Q16543	11140	CDC37	CDC37	Hsp90 co-chaperone Cdc37 (Hsp90 chaperone protein kinase-targeting subunit) (p50Cdc37) [Cleaved into: Hsp90 co-chaperone Cdc37, N-terminally processed]	49	7	144	0.241379	0.137255	0.104124	0.814444	0	181
8666	Q9Y3I0	51493	RTCB	RTCB	tRNA-splicing ligase RtcB homolog (EC 6.5.1.3)	48	8	144	0.236453	0.156863	0.0795905	0.592052	0	178
44	P24666	52	ACP1	PPAC	Low molecular weight phosphotyrosine protein phosphatase (LMW-PTP) (LMW-PTPase) (EC 3.1.3.48) (Adipocyte acid phosphatase) (Low molecular weight cytosolic acid phosphatase) (EC 3.1.3.2) (Red cell acid phosphatase 1)	51	6	143	0.251232	0.117647	0.133584	1.09455	1	174
349	P01008	462	SERPINC1	ANT3	Antithrombin-III (ATIII) (Serpin C1)	78	13	143	0.384236	0.254902	0.129334	0.592052	1	505
524	P01031	727	C5	CO5	Complement C5 (C3 and PZP-like alpha-2-macroglobulin domain-containing protein 4) [Cleaved into: Complement C5 beta chain; Complement C5 alpha chain; C5a anaphylatoxin; Complement C5 alpha' chain]	72	10	143	0.35468	0.196078	0.158601	0.855086	0	452
606	P17655	824	CAPN2	CAN2	Calpain-2 catalytic subunit (EC 3.4.22.53) (Calcium-activated neutral proteinase 2) (CANP 2) (Calpain M-type) (Calpain large polypeptide L2) (Calpain-2 large subunit) (Millimolar-calpain) (M-calpain)	45	13	143	0.221675	0.254902	-0.0332271	-0.201497	0	310
3201	P22061	5110	PCMT1	PIMT	Protein-L-isoaspartate(D-aspartate) O-methyltransferase (PIMT) (EC 2.1.1.77) (L-isoaspartyl protein carboxyl methyltransferase) (Protein L-isoaspartyl/D-aspartyl methyltransferase) (Protein-beta-aspartate methyltransferase)	43	10	143	0.211823	0.196078	0.0157442	0.111426	3	169
3377	P00747	5340	PLG	PLMN	Plasminogen (EC 3.4.21.7) [Cleaved into: Plasmin heavy chain A; Activation peptide; Angiostatin; Plasmin heavy chain A, short form; Plasmin light chain B]	73	12	143	0.359606	0.235294	0.124312	0.611951	7	514
3655	Q16401	5711	PSMD5	PSMD5	26S proteasome non-ATPase regulatory subunit 5 (26S protease subunit S5 basic) (26S proteasome subunit S5B)	39	11	143	0.192118	0.215686	-0.023568	-0.16694	0	189
4061	Q15404	6251	RSU1	RSU1	Ras suppressor protein 1 (RSP-1) (Rsu-1)	52	11	143	0.256158	0.215686	0.0404714	0.248098	6	457
7573	O95865	23564	DDAH2	DDAH2	N(G),N(G)-dimethylarginine dimethylaminohydrolase 2 (DDAH-2) (Dimethylarginine dimethylaminohydrolase 2) (EC 3.5.3.18) (DDAHII) (Dimethylargininase-2) (Protein G6a) (S-phase protein)	60	11	143	0.295567	0.215686	0.0798802	0.454548	0	151
98	P11766	128	ADH5	ADHX	Alcohol dehydrogenase class-3 (EC 1.1.1.1) (Alcohol dehydrogenase 5) (Alcohol dehydrogenase class chi chain) (Alcohol dehydrogenase class-III) (Glutathione-dependent formaldehyde dehydrogenase) (FALDH) (FDH) (GSH-FDH) (EC 1.1.1.-) (S-(hydroxymethyl)glutathione dehydrogenase) (EC 1.1.1.284)	58	11	142	0.285714	0.215686	0.070028	0.405639	6	184
1145	P17844	1655	DDX5	DDX5	Probable ATP-dependent RNA helicase DDX5 (EC 3.6.4.13) (DEAD box protein 5) (RNA helicase p68)	43	6	142	0.211823	0.117647	0.0941756	0.848392	15	412
1363	P09104	2026	ENO2	ENOG	Gamma-enolase (EC 4.2.1.11) (2-phospho-D-glycerate hydro-lyase) (Enolase 2) (Neural enolase) (Neuron-specific enolase) (NSE)	60	15	142	0.295567	0.294118	0.00144886	0.00708942	42	553
3480	P63151	5520	PPP2R2A	2ABA	Serine/threonine-protein phosphatase 2A 55 kDa regulatory subunit B alpha isoform (PP2A subunit B isoform B55-alpha) (PP2A subunit B isoform PR55-alpha) (PP2A subunit B isoform R2-alpha) (PP2A subunit B isoform alpha)	46	8	142	0.226601	0.156863	0.0697382	0.530651	0	176
5015	Q13838	7919	DDX39B	DX39B	Spliceosome RNA helicase DDX39B (EC 3.6.4.13) (56 kDa U2AF65-associated protein) (ATP-dependent RNA helicase p47) (DEAD box protein UAP56) (HLA-B-associated transcript 1 protein)	41	8	142	0.20197	0.156863	0.0451077	0.364641	15	412
5116	P62807	8347	H2BC4	H2B1C	Histone H2B type 1-C/E/F/G/I (Histone H2B.1 A) (Histone H2B.a) (H2B/a) (Histone H2B.g) (H2B/g) (Histone H2B.h) (H2B/h) (Histone H2B.k) (H2B/k) (Histone H2B.l) (H2B/l)	38	13	142	0.187192	0.254902	-0.0677098	-0.445423	0	434
6485	Q7L2H7	10480	EIF3M	EIF3M	Eukaryotic translation initiation factor 3 subunit M (eIF3m) (Fetal lung protein B5) (hFL-B5) (PCI domain-containing protein 1)	43	9	142	0.211823	0.176471	0.0353521	0.263429	0	180
8845	Q9NR45	54187	NANS	SIAS	Sialic acid synthase (N-acetylneuraminate synthase) (EC 2.5.1.56) (N-acetylneuraminate-9-phosphate synthase) (EC 2.5.1.57) (N-acetylneuraminic acid phosphate synthase) (N-acetylneuraminic acid synthase)	47	12	142	0.231527	0.235294	-0.00376702	-0.0232842	2	169
138	P00568	203	AK1	KAD1	Adenylate kinase isoenzyme 1 (AK 1) (EC 2.7.4.3) (EC 2.7.4.6) (ATP-AMP transphosphorylase 1) (ATP:AMP phosphotransferase) (Adenylate monophosphate kinase) (Myokinase)	50	9	141	0.246305	0.176471	0.0698348	0.481021	10	259
284	P48444	372	ARCN1	COPD	Coatomer subunit delta (Archain) (Delta-coat protein) (Delta-COP)	36	9	141	0.17734	0.176471	0.000869313	0.00708942	0	186
1427	P62495	2107	ETF1	ERF1	Eukaryotic peptide chain release factor subunit 1 (Eukaryotic release factor 1) (eRF1) (Protein Cl1) (TB3-1)	46	9	141	0.226601	0.176471	0.0501304	0.360726	0	175
2472	P04259	3854	KRT6B	K2C6B	Keratin, type II cytoskeletal 6B (Cytokeratin-6B) (CK-6B) (Keratin-6B) (K6B) (Type-II keratin Kb10)	50	12	141	0.246305	0.235294	0.0110113	0.0659831	0	437
3757	P20742	5858	PZP	PZP	Pregnancy zone protein (C3 and PZP-like alpha-2-macroglobulin domain-containing protein 6)	75	6	141	0.369458	0.117647	0.251811	1.65095	11	304
4199	P34897	6472	SHMT2	GLYM	Serine hydroxymethyltransferase, mitochondrial (SHMT) (EC 2.1.2.1) (Glycine hydroxymethyltransferase) (Serine methylase)	34	15	141	0.167488	0.294118	-0.12663	-0.812338	30	228
4506	Q16563	6856	SYPL1	SYPL1	Synaptophysin-like protein 1 (Pantophysin)	38	8	141	0.187192	0.156863	0.0303294	0.255017	0	172
5590	O15427	9123	SLC16A3	MOT4	Monocarboxylate transporter 4 (MCT 4) (Solute carrier family 16 member 3)	49	12	141	0.241379	0.235294	0.00608519	0.0368368	0	163
7138	Q15691	22919	MAPRE1	MARE1	Microtubule-associated protein RP/EB family member 1 (APC-binding protein EB1) (End-binding protein 1) (EB1)	45	9	141	0.221675	0.176471	0.0452043	0.329018	0	187
7436	Q9BSJ8	23344	ESYT1	ESYT1	Extended synaptotagmin-1 (E-Syt1) (Membrane-bound C2 domain-containing protein)	42	13	141	0.206897	0.254902	-0.0480054	-0.301033	0	159
7976	Q9HB71	27101	CACYBP	CYBP	Calcyclin-binding protein (CacyBP) (hCacyBP) (S100A6-binding protein) (Siah-interacting protein)	48	7	141	0.236453	0.137255	0.0991983	0.784697	0	165
10421	Q96FZ7	79643	CHMP6	CHMP6	Charged multivesicular body protein 6 (Chromatin-modifying protein 6) (Vacuolar protein sorting-associated protein 20) (Vps20) (hVps20)	54	9	141	0.26601	0.176471	0.0895393	0.592052	0	166
1325	P29317	1969	EPHA2	EPHA2	Ephrin type-A receptor 2 (EC 2.7.10.1) (Epithelial cell kinase) (Tyrosine-protein kinase receptor ECK)	59	8	140	0.29064	0.156863	0.133778	0.889732	10	419
1769	P17174	2805	GOT1	AATC	Aspartate aminotransferase, cytoplasmic (cAspAT) (EC 2.6.1.1) (EC 2.6.1.3) (Cysteine aminotransferase, cytoplasmic) (Cysteine transaminase, cytoplasmic) (cCAT) (Glutamate oxaloacetate transaminase 1) (Transaminase A)	59	9	140	0.29064	0.176471	0.11417	0.719807	21	244
1809	P62993	2885	GRB2	GRB2	Growth factor receptor-bound protein 2 (Adapter protein GRB2) (Protein Ash) (SH2/SH3 adapter GRB2)	49	10	140	0.241379	0.196078	0.0453009	0.299871	0	175
1911	P16401	3009	H1-5	H15	Histone H1.5 (Histone H1a) (Histone H1b) (Histone H1s-3)	66	13	140	0.325123	0.254902	0.0702212	0.351044	0	299
2159	Q99873	3276	PRMT1	ANM1	Protein arginine N-methyltransferase 1 (EC 2.1.1.319) (Histone-arginine N-methyltransferase PRMT1) (Interferon receptor 1-bound protein 4)	42	9	140	0.206897	0.176471	0.030426	0.229482	0	187
2492	P08727	3880	KRT19	K1C19	Keratin, type I cytoskeletal 19 (Cytokeratin-19) (CK-19) (Keratin-19) (K19)	38	11	140	0.187192	0.215686	-0.0284942	-0.204415	0	343
3395	O15162	5359	PLSCR1	PLS1	Phospholipid scramblase 1 (PL scramblase 1) (Ca(2+)-dependent phospholipid scramblase 1) (Erythrocyte phospholipid scramblase) (MmTRA1b)	46	3	140	0.226601	0.0588235	0.167777	1.94569	0	224
5238	P54577	8565	YARS1	SYYC	Tyrosine--tRNA ligase, cytoplasmic (EC 6.1.1.1) (Tyrosyl-tRNA synthetase) (TyrRS) [Cleaved into: Tyrosine--tRNA ligase, cytoplasmic, N-terminally processed]	45	8	140	0.221675	0.156863	0.0648121	0.498943	18	194
7947	Q9Y639	27020	NPTN	NPTN	Neuroplastin (Stromal cell-derived receptor 1) (SDR-1)	47	7	140	0.231527	0.137255	0.0942722	0.754323	0	372
8011	Q9UN37	27183	VPS4A	VPS4A	Vacuolar protein sorting-associated protein 4A (EC 3.6.4.6) (Protein SKD2) (VPS4-1) (hVPS4)	70	5	140	0.344828	0.0980392	0.246788	1.81444	0	257
599	P40121	822	CAPG	CAPG	Macrophage-capping protein (Actin regulatory protein CAP-G)	43	12	139	0.211823	0.235294	-0.0234715	-0.151608	0	427
1984	P49773	3094	HINT1	HINT1	Histidine triad nucleotide-binding protein 1 (EC 3.-.-.-) (Adenosine 5'-monophosphoramidase) (Protein kinase C inhibitor 1) (Protein kinase C-interacting protein 1) (PKCI-1)	47	8	139	0.231527	0.156863	0.0746643	0.561678	5	190
2309	Q13418	3611	ILK	ILK	Integrin-linked protein kinase (EC 2.7.11.1) (59 kDa serine/threonine-protein kinase) (ILK-1) (ILK-2) (p59ILK)	59	9	139	0.29064	0.176471	0.11417	0.719807	5	373
3245	P36955	5176	SERPINF1	PEDF	Pigment epithelium-derived factor (PEDF) (Cell proliferation-inducing gene 35 protein) (EPC-1) (Serpin F1)	80	12	139	0.394089	0.235294	0.158795	0.744055	1	505
3468	P36873	5501	PPP1CC	PP1G	Serine/threonine-protein phosphatase PP1-gamma catalytic subunit (PP-1G) (EC 3.1.3.16) (Protein phosphatase 1C catalytic subunit)	43	8	139	0.211823	0.156863	0.0549599	0.433354	0	299
3944	P84098	6143	RPL19	RL19	60S ribosomal protein L19 (Large ribosomal subunit protein eL19)	51	13	139	0.251232	0.254902	-0.00367043	-0.020925	0	192
3963	P46779	6158	RPL28	RL28	60S ribosomal protein L28 (Large ribosomal subunit protein eL28)	44	10	139	0.216749	0.196078	0.0206703	0.144593	0	179
4332	P62314	6632	SNRPD1	SMD1	Small nuclear ribonucleoprotein Sm D1 (Sm-D1) (Sm-D autoantigen) (snRNP core protein D1)	34	8	139	0.167488	0.156863	0.0106249	0.0945523	0	249
5585	P61421	9114	ATP6V0D1	VA0D1	V-type proton ATPase subunit d 1 (V-ATPase subunit d 1) (32 kDa accessory protein) (V-ATPase 40 kDa accessory protein) (V-ATPase AC39 subunit) (p39) (Vacuolar proton pump subunit d 1)	52	10	139	0.256158	0.196078	0.0600792	0.385601	0	199
6794	P53999	10923	SUB1	TCP4	Activated RNA polymerase II transcriptional coactivator p15 (Positive cofactor 4) (PC4) (SUB1 homolog) (p14)	42	4	139	0.206897	0.0784314	0.128465	1.39941	0	171
12391	P51991	220988	HNRNPA3	ROA3	Heterogeneous nuclear ribonucleoprotein A3 (hnRNP A3)	41	7	139	0.20197	0.137255	0.0647155	0.557287	2	346
1156	O43143	1665	DHX15	DHX15	Pre-mRNA-splicing factor ATP-dependent RNA helicase DHX15 (EC 3.6.4.13) (ATP-dependent RNA helicase #46) (DEAH box protein 15)	44	6	138	0.216749	0.117647	0.0991017	0.881559	2	277
2621	P09960	4048	LTA4H	LKHA4	Leukotriene A-4 hydrolase (LTA-4 hydrolase) (EC 3.3.2.6) (Leukotriene A(4) hydrolase)	58	12	138	0.285714	0.235294	0.0504202	0.280108	17	405
2631	P02788	4057	LTF	TRFL	Lactotransferrin (Lactoferrin) (EC 3.4.21.-) (Growth-inhibiting protein 12) (Talalactoferrin) [Cleaved into: Lactoferricin-H (Lfcin-H); Kaliocin-1; Lactoferroxin-A; Lactoferroxin-B; Lactoferroxin-C]	72	14	138	0.35468	0.27451	0.08017	0.36966	0	389
3899	Q9H4A4	6051	RNPEP	AMPB	Aminopeptidase B (AP-B) (EC 3.4.11.6) (Arginine aminopeptidase) (Arginyl aminopeptidase)	43	13	138	0.211823	0.254902	-0.0430793	-0.267086	17	405
12696	Q8IUE6	317772	H2AC21	H2A2B	Histone H2A type 2-B	38	4	138	0.187192	0.0784314	0.108761	1.25502	0	452
637	Q03135	857	CAV1	CAV1	Caveolin-1	40	11	137	0.197044	0.215686	-0.0186419	-0.130414	0	169
1178	P15559	1728	NQO1	NQO1	NAD(P)H dehydrogenase [quinone] 1 (EC 1.6.5.2) (Azoreductase) (DT-diaphorase) (DTD) (Menadione reductase) (NAD(P)H:quinone oxidoreductase 1) (Phylloquinone reductase) (Quinone reductase 1) (QR1)	49	8	137	0.241379	0.156863	0.0845166	0.621799	4	178
1372	Q99808	2030	SLC29A1	S29A1	Equilibrative nucleoside transporter 1 (Equilibrative nitrobenzylmercaptopurine riboside-sensitive nucleoside transporter) (Equilibrative NBMPR-sensitive nucleoside transporter) (Nucleoside transporter, es-type) (Solute carrier family 29 member 1)	50	6	137	0.246305	0.117647	0.128658	1.06598	0	189
1660	P02774	2638	GC	VTDB	Vitamin D-binding protein (DBP) (VDB) (Gc protein-derived macrophage activating factor) (Gc-MAF) (GcMAF) (Gc-globulin) (Group-specific component) (Gc) (Vitamin D-binding protein-macrophage activating factor) (DBP-maf)	65	11	137	0.320197	0.215686	0.104511	0.570026	0	168
1848	P48637	2937	GSS	GSHB	Glutathione synthetase (GSH synthetase) (GSH-S) (EC 6.3.2.3) (Glutathione synthase)	41	11	137	0.20197	0.215686	-0.0137158	-0.0947902	0	162
3299	Q00325	5250	SLC25A3	MPCP	Phosphate carrier protein, mitochondrial (Phosphate transport protein) (PTP) (Solute carrier family 25 member 3)	45	12	137	0.221675	0.235294	-0.0136192	-0.08602	0	178
3388	Q04941	5355	PLP2	PLP2	Proteolipid protein 2 (Differentiation-dependent protein A4) (Intestinal membrane A4 protein)	36	8	137	0.17734	0.156863	0.0204772	0.177014	0	253
4755	Q8WZ42	7273	TTN	TITIN	Titin (EC 2.7.11.1) (Connectin) (Rhabdomyosarcoma antigen MU-RMS-40.14)	41	7	137	0.20197	0.137255	0.0647155	0.557287	0	198
5110	Q6FI13	8337	H2AC18	H2A2A	Histone H2A type 2-A (Histone H2A.2) (Histone H2A/o)	38	5	137	0.187192	0.0980392	0.0891529	0.933089	0	452
6469	Q9UQB8	10458	BAIAP2	BAIP2	Brain-specific angiogenesis inhibitor 1-associated protein 2 (BAI-associated protein 2) (BAI1-associated protein 2) (Protein BAP2) (Fas ligand-associated factor 3) (FLAF3) (Insulin receptor substrate p53/p58) (IRS-58) (IRSp53/58) (Insulin receptor substrate protein of 53 kDa) (IRSp53) (Insulin receptor substrate p53)	60	5	137	0.295567	0.0980392	0.197527	1.59205	0	170
8771	P30085	51727	CMPK1	KCY	UMP-CMP kinase (EC 2.7.4.14) (Deoxycytidylate kinase) (CK) (dCMP kinase) (Nucleoside-diphosphate kinase) (EC 2.7.4.6) (Uridine monophosphate/cytidine monophosphate kinase) (UMP/CMP kinase) (UMP/CMPK)	45	12	137	0.221675	0.235294	-0.0136192	-0.08602	10	259
465	P53004	644	BLVRA	BIEA	Biliverdin reductase A (BVR A) (EC 1.3.1.24) (Biliverdin-IX alpha-reductase)	48	7	136	0.236453	0.137255	0.0991983	0.784697	0	172
2258	P01876	3493	IGHA1	IGHA1	Immunoglobulin heavy constant alpha 1 (Ig alpha-1 chain C region) (Ig alpha-1 chain C region BUR) (Ig alpha-1 chain C region TRO)	62	15	136	0.305419	0.294118	0.0113011	0.0543951	0	136
4478	Q15833	6813	STXBP2	STXB2	Syntaxin-binding protein 2 (Protein unc-18 homolog 2) (Unc18-2) (Protein unc-18 homolog B) (Unc-18B)	50	8	136	0.246305	0.156863	0.0894427	0.650946	0	293
5241	O00764	8566	PDXK	PDXK	Pyridoxal kinase (EC 2.7.1.35) (Pyridoxine kinase)	48	6	136	0.236453	0.117647	0.118806	1.00709	5	167
6801	P30048	10935	PRDX3	PRDX3	Thioredoxin-dependent peroxide reductase, mitochondrial (EC 1.11.1.15) (Antioxidant protein 1) (AOP-1) (HBC189) (Peroxiredoxin III) (Prx-III) (Peroxiredoxin-3) (Protein MER5 homolog)	31	13	136	0.152709	0.254902	-0.102193	-0.739154	41	514
10485	Q7Z406	79784	MYH14	MYH14	Myosin-14 (Myosin heavy chain 14) (Myosin heavy chain, non-muscle IIc) (Non-muscle myosin heavy chain IIc) (NMHC II-C)	36	7	136	0.17734	0.137255	0.040085	0.36966	0	508
120	O43747	164	AP1G1	AP1G1	AP-1 complex subunit gamma-1 (Adaptor protein complex AP-1 subunit gamma-1) (Adaptor-related protein complex 1 subunit gamma-1) (Clathrin assembly protein complex 1 gamma-1 large chain) (Gamma1-adaptin) (Golgi adaptor HA1/AP1 adaptin subunit gamma-1)	42	11	135	0.206897	0.215686	-0.00878972	-0.0600248	0	158
1057	P17812	1503	CTPS1	PYRG1	CTP synthase 1 (EC 6.3.4.2) (CTP synthetase 1) (UTP--ammonia ligase 1)	41	13	135	0.20197	0.254902	-0.0529315	-0.335798	16	173
1504	P14324	2224	FDPS	FPPS	Farnesyl pyrophosphate synthase (FPP synthase) (FPS) (EC 2.5.1.10) ((2E,6E)-farnesyl diphosphate synthase) (Dimethylallyltranstransferase) (EC 2.5.1.1) (Farnesyl diphosphate synthase) (Geranyltranstransferase)	43	14	135	0.211823	0.27451	-0.0626871	-0.374001	14	178
1778	P35052	2817	GPC1	GPC1	Glypican-1 [Cleaved into: Secreted glypican-1]	49	8	135	0.241379	0.156863	0.0845166	0.621799	0	239
1847	P00390	2936	GSR	GSHR	Glutathione reductase, mitochondrial (GR) (GRase) (EC 1.8.1.7)	47	10	135	0.231527	0.196078	0.0354487	0.23975	49	253
2132	P14866	3191	HNRNPL	HNRPL	Heterogeneous nuclear ribonucleoprotein L (hnRNP L)	40	5	135	0.197044	0.0980392	0.0990051	1.00709	0	176
2268	P01591	3512	JCHAIN	IGJ	Immunoglobulin J chain (Joining chain of multimeric IgA and IgM)	67	9	135	0.330049	0.176471	0.153579	0.903254	0	164
2491	P05783	3875	KRT18	K1C18	Keratin, type I cytoskeletal 18 (Cell proliferation-inducing gene 46 protein) (Cytokeratin-18) (CK-18) (Keratin-18) (K18)	41	15	135	0.20197	0.294118	-0.0921472	-0.542249	0	168
3047	Q15233	4841	NONO	NONO	Non-POU domain-containing octamer-binding protein (NonO protein) (54 kDa nuclear RNA- and DNA-binding protein) (55 kDa nuclear protein) (DNA-binding p52/p100 complex, 52 kDa subunit) (NMT55) (p54(nrb)) (p54nrb)	43	5	135	0.211823	0.0980392	0.113783	1.11143	0	218
3248	P12955	5184	PEPD	PEPD	Xaa-Pro dipeptidase (X-Pro dipeptidase) (EC 3.4.13.9) (Imidodipeptidase) (Peptidase D) (Proline dipeptidase) (Prolidase)	52	8	135	0.256158	0.156863	0.0992949	0.707529	8	248
4167	P84103	6428	SRSF3	SRSF3	Serine/arginine-rich splicing factor 3 (Pre-mRNA-splicing factor SRP20) (Splicing factor, arginine/serine-rich 3)	31	8	135	0.152709	0.156863	-0.00415339	-0.0387143	0	199
4803	P68036	7332	UBE2L3	UB2L3	Ubiquitin-conjugating enzyme E2 L3 (EC 2.3.2.23) (E2 ubiquitin-conjugating enzyme L3) (L-UBC) (UbcH7) (Ubiquitin carrier protein L3) (Ubiquitin-conjugating enzyme E2-F1) (Ubiquitin-protein ligase L3)	41	6	135	0.20197	0.117647	0.0843234	0.779679	0	276
5214	Q9UNS2	8533	COPS3	CSN3	COP9 signalosome complex subunit 3 (SGN3) (Signalosome subunit 3) (JAB1-containing signalosome subunit 3)	37	8	135	0.182266	0.156863	0.0254033	0.216543	0	171
6848	Q92616	10985	GCN1	GCN1	eIF-2-alpha kinase activator GCN1 (GCN1 eIF-2-alpha kinase activator homolog) (GCN1-like protein 1) (General control of amino-acid synthesis 1-like protein 1) (Translational activator GCN1) (HsGCN1)	47	11	135	0.231527	0.215686	0.0158408	0.102247	0	172
7233	Q9BS26	23071	ERP44	ERP44	Endoplasmic reticulum resident protein 44 (ER protein 44) (ERp44) (Thioredoxin domain-containing protein 4)	41	14	135	0.20197	0.27451	-0.0725394	-0.442713	41	438
7717	Q9Y3U8	25873	RPL36	RL36	60S ribosomal protein L36 (Large ribosomal subunit protein eL36)	46	9	135	0.226601	0.176471	0.0501304	0.360726	0	167
8367	Q9NZN3	30845	EHD3	EHD3	EH domain-containing protein 3 (PAST homolog 3)	68	9	135	0.334975	0.176471	0.158505	0.924627	0	404
520	P0C0L4	720	C4A	CO4A	Complement C4-A (Acidic complement C4) (C3 and PZP-like alpha-2-macroglobulin domain-containing protein 2) [Cleaved into: Complement C4 beta chain; Complement C4-A alpha chain; C4a anaphylatoxin; C4b-A; C4d-A; Complement C4 gamma chain]	70	13	134	0.344828	0.254902	0.0899256	0.435933	0	452
940	P00450	1356	CP	CERU	Ceruloplasmin (EC 1.16.3.1) (Ferroxidase)	66	9	134	0.325123	0.176471	0.148653	0.881559	14	199
1131	Q16531	1642	DDB1	DDB1	DNA damage-binding protein 1 (DDB p127 subunit) (DNA damage-binding protein a) (DDBa) (Damage-specific DNA-binding protein 1) (HBV X-associated protein 1) (XAP-1) (UV-damaged DNA-binding factor) (UV-damaged DNA-binding protein 1) (UV-DDB 1) (XPE-binding factor) (XPE-BF) (Xeroderma pigmentosum group E-complementing protein) (XPCe)	46	11	134	0.226601	0.215686	0.0109147	0.0712198	0	173
1137	P39656	1650	DDOST	OST48	Dolichyl-diphosphooligosaccharide--protein glycosyltransferase 48 kDa subunit (DDOST 48 kDa subunit) (Oligosaccharyl transferase 48 kDa subunit)	38	14	134	0.187192	0.27451	-0.0873177	-0.552338	0	157
1248	Q02413	1828	DSG1	DSG1	Desmoglein-1 (Cadherin family member 4) (Desmosomal glycoprotein 1) (DG1) (DGI) (Pemphigus foliaceus antigen)	55	7	134	0.270936	0.137255	0.133681	0.981094	0	346
1379	O43491	2037	EPB41L2	E41L2	Band 4.1-like protein 2 (Generally expressed protein 4.1) (4.1G)	49	9	134	0.241379	0.176471	0.0649087	0.451874	0	205
1533	P07954	2271	FH	FUMH	Fumarate hydratase, mitochondrial (Fumarase) (EC 4.2.1.2)	48	14	134	0.236453	0.27451	-0.0380566	-0.215303	10	166
4428	Q04837	6742	SSBP1	SSBP	Single-stranded DNA-binding protein, mitochondrial (Mt-SSB) (MtSSB) (PWP1-interacting protein 17)	31	9	134	0.152709	0.176471	-0.0237612	-0.208639	14	165
4807	Q13404	7335	UBE2V1	UB2V1	Ubiquitin-conjugating enzyme E2 variant 1 (UEV-1) (CROC-1) (TRAF6-regulated IKK activator 1 beta Uev1A)	47	8	134	0.231527	0.156863	0.0746643	0.561678	0	173
6256	O75787	10159	ATP6AP2	RENR	Renin receptor (ATPase H(+)-transporting lysosomal accessory protein 2) (ATPase H(+)-transporting lysosomal-interacting protein 2) (ER-localized type I transmembrane adaptor) (Embryonic liver differentiation factor 10) (N14F) (Renin/prorenin receptor) (Vacuolar ATP synthase membrane sector-associated protein M8-9) (ATP6M8-9) (V-ATPase M8.9 subunit)	35	9	134	0.172414	0.176471	-0.0040568	-0.0335526	0	166
6285	P61970	10204	NUTF2	NTF2	Nuclear transport factor 2 (NTF-2) (Placental protein 15) (PP15)	45	8	134	0.221675	0.156863	0.0648121	0.498943	0	149
7147	Q9NP72	22931	RAB18	RAB18	Ras-related protein Rab-18	41	10	134	0.20197	0.196078	0.00589201	0.0427133	0	162
9612	Q9NYU2	56886	UGGT1	UGGG1	UDP-glucose:glycoprotein glucosyltransferase 1 (UGT1) (hUGT1) (EC 2.4.1.-) (UDP--Glc:glycoprotein glucosyltransferase) (UDP-glucose ceramide glucosyltransferase-like 1)	33	17	134	0.162562	0.333333	-0.170772	-1.03598	0	169
9736	Q9BR76	57175	CORO1B	COR1B	Coronin-1B (Coronin-2)	51	9	134	0.251232	0.176471	0.0747609	0.50959	0	318
102	P55263	132	ADK	ADK	Adenosine kinase (AK) (EC 2.7.1.20) (Adenosine 5'-phosphotransferase)	50	7	133	0.246305	0.137255	0.109051	0.843591	14	163
111	P30566	158	ADSL	PUR8	Adenylosuccinate lyase (ADSL) (ASL) (EC 4.3.2.2) (Adenylosuccinase) (ASase)	54	10	133	0.26601	0.196078	0.0699314	0.440049	17	171
153	Q13740	214	ALCAM	CD166	CD166 antigen (Activated leukocyte cell adhesion molecule) (CD antigen CD166)	46	7	133	0.226601	0.137255	0.0893461	0.723296	0	162
1024	P21291	1465	CSRP1	CSRP1	Cysteine and glycine-rich protein 1 (Cysteine-rich protein 1) (CRP) (CRP1) (Epididymis luminal protein 141) (HEL-141)	43	9	133	0.211823	0.176471	0.0353521	0.263429	0	159
1342	P30740	1992	SERPINB1	ILEU	Leukocyte elastase inhibitor (LEI) (Monocyte/neutrophil elastase inhibitor) (EI) (M/NEI) (Peptidase inhibitor 2) (PI-2) (Serpin B1)	41	17	133	0.20197	0.333333	-0.131363	-0.722821	1	505
1428	P13804	2108	ETFA	ETFA	Electron transfer flavoprotein subunit alpha, mitochondrial (Alpha-ETF)	36	14	133	0.17734	0.27451	-0.0971699	-0.63034	13	167
1563	Q14315	2318	FLNC	FLNC	Filamin-C (FLN-C) (FLNc) (ABP-280-like protein) (ABP-L) (Actin-binding-like protein) (Filamin-2) (Gamma-filamin)	47	16	133	0.231527	0.313725	-0.0821984	-0.438322	0	536
2452	P52292	3838	KPNA2	IMA1	Importin subunit alpha-1 (Karyopherin subunit alpha-2) (RAG cohort protein 1) (SRP1-alpha)	45	5	133	0.221675	0.0980392	0.123636	1.17701	0	197
3160	Q15102	5050	PAFAH1B3	PA1B3	Platelet-activating factor acetylhydrolase IB subunit gamma (EC 3.1.1.47) (PAF acetylhydrolase 29 kDa subunit) (PAF-AH 29 kDa subunit) (PAF-AH subunit gamma) (PAFAH subunit gamma)	44	7	133	0.216749	0.137255	0.0794939	0.659166	0	193
3311	P35237	5269	SERPINB6	SPB6	Serpin B6 (Cytoplasmic antiproteinase) (CAP) (Peptidase inhibitor 6) (PI-6) (Placental thrombin inhibitor)	46	12	133	0.226601	0.235294	-0.00869313	-0.0543111	1	505
3472	Q15435	5510	PPP1R7	PP1R7	Protein phosphatase 1 regulatory subunit 7 (Protein phosphatase 1 regulatory subunit 22)	43	10	133	0.211823	0.196078	0.0157442	0.111426	6	457
3806	P43487	5902	RANBP1	RANG	Ran-specific GTPase-activating protein (Ran-binding protein 1) (RanBP1)	38	6	133	0.187192	0.117647	0.0695451	0.670054	0	171
4333	P62316	6633	SNRPD2	SMD2	Small nuclear ribonucleoprotein Sm D2 (Sm-D2) (snRNP core protein D2)	32	5	133	0.157635	0.0980392	0.0595963	0.685161	0	249
4410	P19623	6723	SRM	SPEE	Spermidine synthase (SPDSY) (EC 2.5.1.16) (Putrescine aminopropyltransferase)	46	7	133	0.226601	0.137255	0.0893461	0.723296	0	185
4986	Q92626	7837	PXDN	PXDN	Peroxidasin homolog (EC 1.11.1.7) (Melanoma-associated antigen MG50) (Vascular peroxidase 1) (p53-responsive gene 2 protein)	47	6	133	0.231527	0.117647	0.11388	0.976716	0	244
5714	Q15029	9343	EFTUD2	U5S1	116 kDa U5 small nuclear ribonucleoprotein component (Elongation factor Tu GTP-binding domain-containing protein 2) (SNU114 homolog) (hSNU114) (U5 snRNP-specific protein, 116 kDa) (U5-116 kDa)	43	11	133	0.211823	0.215686	-0.00386361	-0.0260774	51	449
6197	O43854	10085	EDIL3	EDIL3	EGF-like repeat and discoidin I-like domain-containing protein 3 (Developmentally-regulated endothelial cell locus 1 protein) (Integrin-binding protein DEL1)	61	6	133	0.300493	0.117647	0.182846	1.35286	0	332
6235	P51572	10134	BCAP31	BAP31	B-cell receptor-associated protein 31 (BCR-associated protein 31) (Bap31) (6C6-AG tumor-associated antigen) (Protein CDM) (p28)	46	7	133	0.226601	0.137255	0.0893461	0.723296	0	149
6590	O95433	10598	AHSA1	AHSA1	Activator of 90 kDa heat shock protein ATPase homolog 1 (AHA1) (p38)	43	12	133	0.211823	0.235294	-0.0234715	-0.151608	0	150
6673	Q9Y266	10726	NUDC	NUDC	Nuclear migration protein nudC (Nuclear distribution protein C homolog)	41	11	133	0.20197	0.215686	-0.0137158	-0.0947902	0	169
700	Q8WTV0	949	SCARB1	SCRB1	Scavenger receptor class B member 1 (SRB1) (CD36 and LIMPII analogous 1) (CLA-1) (CD36 antigen-like 1) (Collagen type I receptor, thrombospondin receptor-like 1) (SR-BI) (CD antigen CD36)	56	6	132	0.275862	0.117647	0.158215	1.22948	0	306
918	Q99715	1303	COL12A1	COCA1	Collagen alpha-1(XII) chain	43	7	132	0.211823	0.137255	0.0745678	0.625999	0	151
1129	Q14203	1639	DCTN1	DCTN1	Dynactin subunit 1 (150 kDa dynein-associated polypeptide) (DAP-150) (DP-150) (p135) (p150-glued)	43	8	132	0.211823	0.156863	0.0549599	0.433354	0	177
1175	P00387	1727	CYB5R3	NB5R3	NADH-cytochrome b5 reductase 3 (B5R) (Cytochrome b5 reductase) (EC 1.6.2.2) (Diaphorase-1) [Cleaved into: NADH-cytochrome b5 reductase 3 membrane-bound form; NADH-cytochrome b5 reductase 3 soluble form]	45	12	132	0.221675	0.235294	-0.0136192	-0.08602	5	187
3276	P35080	5217	PFN2	PROF2	Profilin-2 (Profilin II)	51	7	132	0.251232	0.137255	0.113977	0.87216	0	432
3313	P07093	5270	SERPINE2	GDN	Glia-derived nexin (GDN) (Peptidase inhibitor 7) (PI-7) (Protease nexin 1) (PN-1) (Protease nexin I) (Serpin E2)	43	11	132	0.211823	0.215686	-0.00386361	-0.0260774	1	505
4164	Q07955	6426	SRSF1	SRSF1	Serine/arginine-rich splicing factor 1 (Alternative-splicing factor 1) (ASF-1) (Splicing factor, arginine/serine-rich 1) (pre-mRNA-splicing factor SF2, P33 subunit)	33	8	132	0.162562	0.156863	0.00569883	0.0514835	2	346
5316	Q9BV40	8673	VAMP8	VAMP8	Vesicle-associated membrane protein 8 (VAMP-8) (Endobrevin) (EDB)	41	6	132	0.20197	0.117647	0.0843234	0.779679	0	297
6143	Q8IZP0	10006	ABI1	ABI1	Abl interactor 1 (Abelson interactor 1) (Abi-1) (Abl-binding protein 4) (AblBP4) (Eps8 SH3 domain-binding protein) (Eps8-binding protein) (Nap1-binding protein) (Nap1BP) (Spectrin SH3 domain-binding protein 1) (e3B1)	38	5	132	0.187192	0.0980392	0.0891529	0.933089	0	142
11905	Q96FQ6	140576	S100A16	S10AG	Protein S100-A16 (Aging-associated gene 13 protein) (Protein S100-F) (S100 calcium-binding protein A16)	40	8	132	0.197044	0.156863	0.0401816	0.329018	0	135
1314	P00533	1956	EGFR	EGFR	Epidermal growth factor receptor (EC 2.7.10.1) (Proto-oncogene c-ErbB-1) (Receptor tyrosine-protein kinase erbB-1)	51	8	131	0.251232	0.156863	0.0943688	0.679515	0	179
3988	P04844	6185	RPN2	RPN2	Dolichyl-diphosphooligosaccharide--protein glycosyltransferase subunit 2 (Dolichyl-diphosphooligosaccharide--protein glycosyltransferase 63 kDa subunit) (RIBIIR) (Ribophorin II) (RPN-II) (Ribophorin-2)	38	15	131	0.187192	0.294118	-0.106926	-0.651874	0	166
4443	P42224	6772	STAT1	STAT1	Signal transducer and activator of transcription 1-alpha/beta (Transcription factor ISGF-3 components p91/p84)	43	9	131	0.211823	0.176471	0.0353521	0.263429	0	193
5537	P61081	9040	UBE2M	UBC12	NEDD8-conjugating enzyme Ubc12 (EC 6.3.2.-) (NEDD8 carrier protein) (NEDD8 protein ligase) (Ubiquitin-conjugating enzyme E2 M)	42	5	131	0.206897	0.0980392	0.108857	1.07748	0	155
5546	Q8NFJ5	9052	GPRC5A	RAI3	Retinoic acid-induced protein 3 (G-protein coupled receptor family C group 5 member A) (Phorbol ester induced gene 1) (PEIG-1) (Retinoic acid-induced gene 1 protein) (RAIG-1)	55	8	131	0.270936	0.156863	0.114073	0.788449	0	162
8334	Q9Y617	29968	PSAT1	SERC	Phosphoserine aminotransferase (EC 2.6.1.52) (Phosphohydroxythreonine aminotransferase) (PSAT)	50	12	131	0.246305	0.235294	0.0110113	0.0659831	13	173
9257	Q9NUP9	55327	LIN7C	LIN7C	Protein lin-7 homolog C (Lin-7C) (Mammalian lin-seven protein 3) (MALS-3) (Vertebrate lin-7 homolog 3) (Veli-3)	37	8	131	0.182266	0.156863	0.0254033	0.216543	0	165
9713	Q7LBR1	57132	CHMP1B	CHM1B	Charged multivesicular body protein 1b (CHMP1.5) (Chromatin-modifying protein 1b) (CHMP1b) (Vacuolar protein sorting-associated protein 46-2) (Vps46-2) (hVps46-2)	60	3	131	0.295567	0.0588235	0.236743	2.32902	0	241
10818	Q9H299	83442	SH3BGRL3	SH3L3	SH3 domain-binding glutamic acid-rich-like protein 3 (SH3 domain-binding protein 1) (SH3BP-1)	45	9	131	0.221675	0.176471	0.0452043	0.329018	0	172
2005	P01892	3105	#N/A	1A02	HLA class I histocompatibility antigen, A-2 alpha chain (MHC class I antigen A*2)	34	7	130	0.167488	0.137255	0.0302328	0.287197	0	372
2482	P13646	3860	KRT13	K1C13	Keratin, type I cytoskeletal 13 (Cytokeratin-13) (CK-13) (Keratin-13) (K13)	34	10	130	0.167488	0.196078	-0.0285907	-0.227376	0	343
2649	P16422	4072	EPCAM	EPCAM	Epithelial cell adhesion molecule (Ep-CAM) (Adenocarcinoma-associated antigen) (Cell surface glycoprotein Trop-1) (Epithelial cell surface antigen) (Epithelial glycoprotein) (EGP) (Epithelial glycoprotein 314) (EGP314) (hEGP314) (KS 1/4 antigen) (KSA) (Major gastrointestinal tumor-associated protein GA733-2) (Tumor-associated calcium signal transducer 1) (CD antigen CD326)	44	8	130	0.216749	0.156863	0.059886	0.466521	0	186
3721	Q12913	5795	PTPRJ	PTPRJ	Receptor-type tyrosine-protein phosphatase eta (Protein-tyrosine phosphatase eta) (R-PTP-eta) (EC 3.1.3.48) (Density-enhanced phosphatase 1) (DEP-1) (HPTP eta) (Protein-tyrosine phosphatase receptor type J) (R-PTP-J) (CD antigen CD148)	54	11	130	0.26601	0.215686	0.0503236	0.302545	0	344
5304	O15371	8664	EIF3D	EIF3D	Eukaryotic translation initiation factor 3 subunit D (eIF3d) (Eukaryotic translation initiation factor 3 subunit 7) (eIF-3-zeta) (eIF3 p66)	44	4	130	0.216749	0.0784314	0.138317	1.46652	0	170
8058	Q9UBQ5	27335	EIF3K	EIF3K	Eukaryotic translation initiation factor 3 subunit K (eIF3k) (Eukaryotic translation initiation factor 3 subunit 12) (Muscle-specific gene M9 protein) (PLAC-24) (eIF-3 p25) (eIF-3 p28)	33	7	130	0.162562	0.137255	0.0253067	0.244129	0	154
8508	Q9BT78	51138	COPS4	CSN4	COP9 signalosome complex subunit 4 (SGN4) (Signalosome subunit 4) (JAB1-containing signalosome subunit 4)	40	7	130	0.197044	0.137255	0.0597894	0.521663	0	171
411	P48047	539	ATP5PO	ATPO	ATP synthase subunit O, mitochondrial (Oligomycin sensitivity conferral protein) (OSCP)	21	17	129	0.103448	0.333333	-0.229885	-1.68806	17	147
580	P0DP23	801	CALM1	CALM1	Calmodulin-1	27	8	129	0.133005	0.156863	-0.0238578	-0.238023	0	129
1328	Q14240	1974	EIF4A2	IF4A2	Eukaryotic initiation factor 4A-II (eIF-4A-II) (eIF4A-II) (EC 3.6.4.13) (ATP-dependent RNA helicase eIF4A-2)	37	11	129	0.182266	0.215686	-0.0334203	-0.242889	15	412
5249	O43488	8574	AKR7A2	ARK72	Aflatoxin B1 aldehyde reductase member 2 (EC 1.1.1.n11) (AFB1 aldehyde reductase 1) (AFB1-AR 1) (Aldoketoreductase 7) (Succinic semialdehyde reductase) (SSA reductase)	36	11	129	0.17734	0.215686	-0.0383464	-0.282417	11	192
5750	Q9UBQ7	9380	GRHPR	GRHPR	Glyoxylate reductase/hydroxypyruvate reductase (EC 1.1.1.79) (EC 1.1.1.81)	47	10	129	0.231527	0.196078	0.0354487	0.23975	14	135
6437	O14744	10419	PRMT5	ANM5	Protein arginine N-methyltransferase 5 (EC 2.1.1.320) (72 kDa ICln-binding protein) (Histone-arginine N-methyltransferase PRMT5) (Jak-binding protein 1) (Shk1 kinase-binding protein 1 homolog) (SKB1 homolog) (SKB1Hs) [Cleaved into: Protein arginine N-methyltransferase 5, N-terminally processed]	41	10	129	0.20197	0.196078	0.00589201	0.0427133	0	161
6534	Q13561	10540	DCTN2	DCTN2	Dynactin subunit 2 (50 kDa dynein-associated polypeptide) (Dynactin complex 50 kDa subunit) (DCTN-50) (p50 dynamitin)	35	9	129	0.172414	0.176471	-0.0040568	-0.0335526	0	159
6948	P31146	11151	CORO1A	COR1A	Coronin-1A (Coronin-like protein A) (Clipin-A) (Coronin-like protein p57) (Tryptophan aspartate-containing coat protein) (TACO)	51	19	129	0.251232	0.372549	-0.121317	-0.568413	0	318
7197	O75643	23020	SNRNP200	U520	U5 small nuclear ribonucleoprotein 200 kDa helicase (EC 3.6.4.13) (Activating signal cointegrator 1 complex subunit 3-like 1) (BRR2 homolog) (U5 snRNP-specific 200 kDa protein) (U5-200KD)	38	7	129	0.187192	0.137255	0.0499372	0.447662	0	172
8412	Q9NRV9	50865	HEBP1	HEBP1	Heme-binding protein 1 (p22HBP)	42	7	129	0.206897	0.137255	0.0696416	0.592052	0	142
8769	Q9UBS4	51726	DNAJB11	DJB11	DnaJ homolog subfamily B member 11 (APOBEC1-binding protein 2) (ABBP-2) (DnaJ protein homolog 9) (ER-associated DNAJ) (ER-associated Hsp40 co-chaperone) (Endoplasmic reticulum DNA J domain-containing protein 3) (ER-resident protein ERdj3) (ERdj3) (ERj3p) (HEDJ) (Human DnaJ protein 9) (hDj-9) (PWP1-interacting protein 4)	29	9	129	0.142857	0.176471	-0.0336134	-0.304855	8	327
9184	Q9NVJ2	55207	ARL8B	ARL8B	ADP-ribosylation factor-like protein 8B (ADP-ribosylation factor-like protein 10C) (Novel small G protein indispensable for equal chromosome segregation 1)	37	9	129	0.182266	0.176471	0.00579542	0.0466178	0	180
30	P24752	38	ACAT1	THIL	Acetyl-CoA acetyltransferase, mitochondrial (EC 2.3.1.9) (Acetoacetyl-CoA thiolase) (T2)	34	15	128	0.167488	0.294118	-0.12663	-0.812338	29	271
2151	P02790	3263	HPX	HEMO	Hemopexin (Beta-1B-glycoprotein)	58	15	128	0.285714	0.294118	-0.00840336	-0.0418202	0	424
3956	P61254	6154	RPL26	RL26	60S ribosomal protein L26 (Large ribosomal subunit protein uL24)	38	8	128	0.187192	0.156863	0.0303294	0.255017	18	182
4131	P31431	6385	SDC4	SDC4	Syndecan-4 (SYND4) (Amphiglycan) (Ryudocan core protein)	52	8	128	0.256158	0.156863	0.0992949	0.707529	0	186
5309	O15372	8667	EIF3H	EIF3H	Eukaryotic translation initiation factor 3 subunit H (eIF3h) (Eukaryotic translation initiation factor 3 subunit 3) (eIF-3-gamma) (eIF3 p40 subunit)	34	8	128	0.167488	0.156863	0.0106249	0.0945523	0	176
5516	O60568	8985	PLOD3	PLOD3	Procollagen-lysine,2-oxoglutarate 5-dioxygenase 3 (EC 1.14.11.4) (Lysyl hydroxylase 3) (LH3)	29	14	128	0.142857	0.27451	-0.131653	-0.942285	0	231
7017	Q99653	11261	CHP1	CHP1	Calcineurin B homologous protein 1 (Calcineurin B-like protein) (Calcium-binding protein CHP) (Calcium-binding protein p22) (EF-hand calcium-binding domain-containing protein p22)	41	4	128	0.20197	0.0784314	0.123539	1.36464	0	452
8758	Q9UBQ0	51699	VPS29	VPS29	Vacuolar protein sorting-associated protein 29 (hVPS29) (PEP11 homolog) (Vesicle protein sorting 29)	35	8	128	0.172414	0.156863	0.015551	0.136372	1	157
11342	Q96S97	91663	MYADM	MYADM	Myeloid-associated differentiation marker (Protein SB135)	46	5	128	0.226601	0.0980392	0.128562	1.20872	0	253
1921	P84243	3021	H3-3B	H33	Histone H3.3	42	5	127	0.206897	0.0980392	0.108857	1.07748	0	487
2208	P24821	3371	TNC	TENA	Tenascin (TN) (Cytotactin) (GMEM) (GP 150-225) (Glioma-associated-extracellular matrix antigen) (Hexabrachion) (JI) (Myotendinous antigen) (Neuronectin) (Tenascin-C) (TN-C)	45	5	127	0.221675	0.0980392	0.123636	1.17701	0	389
3526	P10644	5573	PRKAR1A	KAP0	cAMP-dependent protein kinase type I-alpha regulatory subunit (Tissue-specific extinguisher 1) (TSE1) [Cleaved into: cAMP-dependent protein kinase type I-alpha regulatory subunit, N-terminally processed]	49	8	127	0.241379	0.156863	0.0845166	0.621799	11	238
7538	Q14160	23513	SCRIB	SCRIB	Protein scribble homolog (Scribble) (hScrib) (Protein LAP4)	47	7	127	0.231527	0.137255	0.0942722	0.754323	6	457
9081	Q6IAA8	55004	LAMTOR1	LTOR1	Ragulator complex protein LAMTOR1 (Late endosomal/lysosomal adaptor and MAPK and MTOR activator 1) (Lipid raft adaptor protein p18) (Protein associated with DRMs and endosomes) (p27Kip1-releasing factor from RhoA) (p27RF-Rho)	40	6	127	0.197044	0.117647	0.0793973	0.744055	0	151
112	P30520	159	ADSS2	PURA2	Adenylosuccinate synthetase isozyme 2 (AMPSase 2) (AdSS 2) (EC 6.3.4.4) (Adenylosuccinate synthetase, acidic isozyme) (Adenylosuccinate synthetase, liver isozyme) (L-type adenylosuccinate synthetase) (IMP--aspartate ligase 2)	41	13	126	0.20197	0.254902	-0.0529315	-0.335798	35	165
267	P05067	351	APP	A4	Amyloid beta A4 protein (ABPP) (APPI) (APP) (Alzheimer disease amyloid protein) (Amyloid precursor protein) (Beta-amyloid precursor protein) (Cerebral vascular amyloid peptide) (CVAP) (PreA4) (Protease nexin-II) (PN-II) [Cleaved into: N-APP; Soluble APP-alpha (S-APP-alpha); Soluble APP-beta (S-APP-beta); C99; Beta-amyloid protein 42 (Beta-APP42); Beta-amyloid protein 40 (Beta-APP40); C83; P3(42);…	35	8	126	0.172414	0.156863	0.015551	0.136372	0	181
2262	P01857	3500	IGHG1	IGHG1	Immunoglobulin heavy constant gamma 1 (Ig gamma-1 chain C region) (Ig gamma-1 chain C region EU) (Ig gamma-1 chain C region KOL) (Ig gamma-1 chain C region NIE)	61	14	126	0.300493	0.27451	0.0259828	0.130472	0	126
2525	P55268	3913	LAMB2	LAMB2	Laminin subunit beta-2 (Laminin B1s chain) (Laminin-11 subunit beta) (Laminin-14 subunit beta) (Laminin-15 subunit beta) (Laminin-3 subunit beta) (Laminin-4 subunit beta) (Laminin-7 subunit beta) (Laminin-9 subunit beta) (S-laminin subunit beta) (S-LAM beta)	45	4	126	0.221675	0.0784314	0.143244	1.49894	0	241
3633	Q99436	5695	PSMB7	PSB7	Proteasome subunit beta type-7 (EC 3.4.25.1) (Macropain chain Z) (Multicatalytic endopeptidase complex chain Z) (Proteasome subunit Z)	39	8	126	0.192118	0.156863	0.0352555	0.292492	1	371
3884	Q15382	6009	RHEB	RHEB	GTP-binding protein Rheb (Ras homolog enriched in brain)	40	6	126	0.197044	0.117647	0.0793973	0.744055	0	533
4045	P42677	6232	RPS27	RS27	40S ribosomal protein S27 (Metallopan-stimulin 1) (MPS-1) (Small ribosomal subunit protein eS27)	39	3	126	0.192118	0.0588235	0.133295	1.70753	0	174
10312	O75223	79017	GGCT	GGCT	Gamma-glutamylcyclotransferase (EC 2.3.2.4) (Cytochrome c-releasing factor 21)	38	3	126	0.187192	0.0588235	0.128369	1.67005	0	133
11869	P58546	136319	MTPN	MTPN	Myotrophin (Protein V-1)	37	6	126	0.182266	0.117647	0.064619	0.63158	0	155
322	P36405	403	ARL3	ARL3	ADP-ribosylation factor-like protein 3	49	6	125	0.241379	0.117647	0.123732	1.03684	0	155
1058	P07858	1508	0	CATB	Cathepsin B (EC 3.4.22.1) (APP secretase) (APPS) (Cathepsin B1) [Cleaved into: Cathepsin B light chain; Cathepsin B heavy chain]	38	9	125	0.187192	0.176471	0.0107215	0.0850919	1	255
1742	Q5JWF2	2778	GNAS	GNAS1	Guanine nucleotide-binding protein G(s) subunit alpha isoforms XLas (Adenylate cyclase-stimulating G alpha protein) (Extra large alphas protein) (XLalphas)	69	14	125	0.339901	0.27451	0.0653917	0.308259	0	339
2200	P25685	3337	DNAJB1	DNJB1	DnaJ homolog subfamily B member 1 (DnaJ protein homolog 1) (Heat shock 40 kDa protein 1) (HSP40) (Heat shock protein 40) (Human DnaJ protein 1) (hDj-1)	40	7	125	0.197044	0.137255	0.0597894	0.521663	8	327
2470	P02538	3853	KRT6A	K2C6A	Keratin, type II cytoskeletal 6A (Cytokeratin-6A) (CK-6A) (Cytokeratin-6D) (CK-6D) (Keratin-6A) (K6A) (Type-II keratin Kb6) (allergen Hom s 5)	40	15	125	0.197044	0.294118	-0.0970733	-0.577873	0	437
5118	Q16778	8349	H2BC21	H2B2E	Histone H2B type 2-E (Histone H2B-GL105) (Histone H2B.q) (H2B/q)	32	8	125	0.157635	0.156863	0.000772723	0.00708942	0	434
5270	O60763	8615	USO1	USO1	General vesicular transport factor p115 (Protein USO1 homolog) (Transcytosis-associated protein) (TAP) (Vesicle-docking protein)	43	14	125	0.211823	0.27451	-0.0626871	-0.374001	0	142
5676	Q12904	9255	AIMP1	AIMP1	Aminoacyl tRNA synthase complex-interacting multifunctional protein 1 (Multisynthase complex auxiliary component p43) [Cleaved into: Endothelial monocyte-activating polypeptide 2 (EMAP-2) (Endothelial monocyte-activating polypeptide II) (EMAP-II) (Small inducible cytokine subfamily E member 1)]	36	6	125	0.17734	0.117647	0.0596928	0.592052	18	194
7043	Q99623	11331	PHB2	PHB2	Prohibitin-2 (B-cell receptor-associated protein BAP37) (D-prohibitin) (Repressor of estrogen receptor activity)	31	12	125	0.152709	0.235294	-0.0825848	-0.623677	34	413
8950	Q9BVK6	54732	TMED9	TMED9	Transmembrane emp24 domain-containing protein 9 (GMP25) (Glycoprotein 25L2) (p24 family protein alpha-2) (p24alpha2) (p25)	33	12	125	0.162562	0.235294	-0.0727325	-0.533479	0	175
9602	Q9NR31	56681	SAR1A	SAR1A	GTP-binding protein SAR1a (COPII-associated small GTPase)	37	9	125	0.182266	0.176471	0.00579542	0.0466178	0	168
9684	Q9NRY6	57048	PLSCR3	PLS3	Phospholipid scramblase 3 (PL scramblase 3) (Ca(2+)-dependent phospholipid scramblase 3)	39	2	125	0.192118	0.0392157	0.152903	2.29249	0	224
11026	Q9BRG1	84313	VPS25	VPS25	Vacuolar protein-sorting-associated protein 25 (hVps25) (Dermal papilla-derived protein 9) (ELL-associated protein of 20 kDa) (ESCRT-II complex subunit VPS25)	44	3	125	0.216749	0.0588235	0.157925	1.88156	0	153
308	Q07960	392	ARHGAP1	RHG01	Rho GTPase-activating protein 1 (CDC42 GTPase-activating protein) (GTPase-activating protein rhoGAP) (Rho-related small GTPase protein activator) (Rho-type GTPase-activating protein 1) (p50-RhoGAP)	41	9	124	0.20197	0.176471	0.0254999	0.194716	0	144
888	P02452	1277	COL1A1	CO1A1	Collagen alpha-1(I) chain (Alpha-1 type I collagen)	53	6	124	0.261084	0.117647	0.143437	1.15005	0	292
1139	P30046	1652	DDT	DOPD	D-dopachrome decarboxylase (EC 4.1.1.84) (D-dopachrome tautomerase) (Phenylpyruvate tautomerase II)	45	8	124	0.221675	0.156863	0.0648121	0.498943	0	269
2590	P20700	4001	LMNB1	LMNB1	Lamin-B1	33	9	124	0.162562	0.176471	-0.013909	-0.118441	0	243
3968	P62910	6161	RPL32	RL32	60S ribosomal protein L32 (Large ribosomal subunit protein eL32)	38	8	124	0.187192	0.156863	0.0303294	0.255017	0	172
4427	P05455	6741	SSB	LA	Lupus La protein (La autoantigen) (La ribonucleoprotein) (Sjoegren syndrome type B antigen) (SS-B)	34	7	124	0.167488	0.137255	0.0302328	0.287197	0	169
5843	O43324	9521	EEF1E1	MCA3	Eukaryotic translation elongation factor 1 epsilon-1 (Aminoacyl tRNA synthetase complex-interacting multifunctional protein 3) (Elongation factor p18) (Multisynthase complex auxiliary component p18)	37	5	124	0.182266	0.0980392	0.0842268	0.894615	17	362
5874	O75436	9559	VPS26A	VP26A	Vacuolar protein sorting-associated protein 26A (Vesicle protein sorting 26A) (hVPS26)	36	11	124	0.17734	0.215686	-0.0383464	-0.282417	0	161
6191	Q7Z6Z7	10075	HUWE1	HUWE1	E3 ubiquitin-protein ligase HUWE1 (EC 2.3.2.26) (ARF-binding protein 1) (ARF-BP1) (HECT, UBA and WWE domain-containing protein 1) (HECT-type E3 ubiquitin transferase HUWE1) (Homologous to E6AP carboxyl terminus homologous protein 9) (HectH9) (Large structure of UREB1) (LASU1) (Mcl-1 ubiquitin ligase E3) (Mule) (Upstream regulatory element-binding protein 1) (URE-B1) (URE-binding protein 1)	44	6	124	0.216749	0.117647	0.0991017	0.881559	0	274
6532	O76003	10539	GLRX3	GLRX3	Glutaredoxin-3 (PKC-interacting cousin of thioredoxin) (PICOT) (PKC-theta-interacting protein) (PKCq-interacting protein) (Thioredoxin-like protein 2)	36	10	124	0.17734	0.196078	-0.0187385	-0.144914	8	152
6697	O43865	10768	AHCYL1	SAHH2	S-adenosylhomocysteine hydrolase-like protein 1 (DC-expressed AHCY-like molecule) (IP(3)Rs binding protein released with IP(3)) (IRBIT) (Putative adenosylhomocysteinase 2) (S-adenosyl-L-homocysteine hydrolase 2) (AdoHcyase 2)	40	8	124	0.197044	0.156863	0.0401816	0.329018	16	383
10105	Q9GZM7	64129	TINAGL1	TINAL	Tubulointerstitial nephritis antigen-like (Glucocorticoid-inducible protein 5) (Oxidized LDL-responsive gene 2 protein) (OLRG-2) (Tubulointerstitial nephritis antigen-related protein) (TIN Ag-related protein) (TIN-Ag-RP)	37	7	124	0.182266	0.137255	0.0450111	0.409188	0	146
735	P06493	983	CDK1	CDK1	Cyclin-dependent kinase 1 (CDK1) (EC 2.7.11.22) (EC 2.7.11.23) (Cell division control protein 2 homolog) (Cell division protein kinase 1) (p34 protein kinase)	35	7	123	0.172414	0.137255	0.0351589	0.329018	0	189
858	O14773	1200	TPP1	TPP1	Tripeptidyl-peptidase 1 (TPP-1) (EC 3.4.14.9) (Cell growth-inhibiting gene 1 protein) (Lysosomal pepstatin-insensitive protease) (LPIC) (Tripeptidyl aminopeptidase) (Tripeptidyl-peptidase I) (TPP-I)	43	8	123	0.211823	0.156863	0.0549599	0.433354	0	155
1339	P55010	1983	EIF5	IF5	Eukaryotic translation initiation factor 5 (eIF-5)	39	8	123	0.192118	0.156863	0.0352555	0.292492	0	169
1770	P00505	2806	GOT2	AATM	Aspartate aminotransferase, mitochondrial (mAspAT) (EC 2.6.1.1) (EC 2.6.1.7) (Fatty acid-binding protein) (FABP-1) (Glutamate oxaloacetate transaminase 2) (Kynurenine aminotransferase 4) (Kynurenine aminotransferase IV) (Kynurenine--oxoglutarate transaminase 4) (Kynurenine--oxoglutarate transaminase IV) (Plasma membrane-associated fatty acid-binding protein) (FABPpm) (Transaminase A)	33	20	123	0.162562	0.392157	-0.229595	-1.27044	21	244
3543	P14314	5589	PRKCSH	GLU2B	Glucosidase 2 subunit beta (80K-H protein) (Glucosidase II subunit beta) (Protein kinase C substrate 60.1 kDa protein heavy chain) (PKCSH)	34	14	123	0.167488	0.27451	-0.107022	-0.712803	0	165
5023	Q13155	7965	AIMP2	AIMP2	Aminoacyl tRNA synthase complex-interacting multifunctional protein 2 (Multisynthase complex auxiliary component p38) (Protein JTV-1)	37	7	123	0.182266	0.137255	0.0450111	0.409188	0	163
5816	Q02241	9493	KIF23	KIF23	Kinesin-like protein KIF23 (Kinesin-like protein 5) (Mitotic kinesin-like protein 1)	42	12	123	0.206897	0.235294	-0.0283976	-0.185556	0	351
8061	Q9UMS4	27339	PRPF19	PRP19	Pre-mRNA-processing factor 19 (EC 2.3.2.27) (Nuclear matrix protein 200) (PRP19/PSO4 homolog) (hPso4) (RING-type E3 ubiquitin transferase PRP19) (Senescence evasion factor)	39	6	123	0.192118	0.117647	0.0744712	0.707529	0	147
10371	Q96C19	79180	EFHD2	EFHD2	EF-hand domain-containing protein D2 (Swiprosin-1)	35	11	123	0.172414	0.215686	-0.0432725	-0.323059	0	141
10667	Q9H3Z4	80331	DNAJC5	DNJC5	DnaJ homolog subfamily C member 5 (Ceroid-lipofuscinosis neuronal protein 4) (Cysteine string protein) (CSP)	41	6	123	0.20197	0.117647	0.0843234	0.779679	8	327
10725	Q9H4B7	81027	TUBB1	TBB1	Tubulin beta-1 chain	65	11	123	0.320197	0.215686	0.104511	0.570026	0	544
12274	Q4KMQ2	196527	ANO6	ANO6	Anoctamin-6 (Small-conductance calcium-activated nonselective cation channel) (SCAN channel) (Transmembrane protein 16F)	54	10	123	0.26601	0.196078	0.0699314	0.440049	0	171
317	P52566	397	ARHGDIB	GDIR2	Rho GDP-dissociation inhibitor 2 (Rho GDI 2) (Ly-GDI) (Rho-GDI beta)	39	22	122	0.192118	0.431373	-0.239254	-1.16694	0	360
1140	Q92499	1653	DDX1	DDX1	ATP-dependent RNA helicase DDX1 (EC 3.6.4.13) (DEAD box protein 1) (DEAD box protein retinoblastoma) (DBP-RB)	39	7	122	0.192118	0.137255	0.0548633	0.485137	15	412
1557	Q13045	2314	FLII	FLII	Protein flightless-1 homolog	44	8	122	0.216749	0.156863	0.059886	0.466521	6	457
1712	P00367	2746	GLUD1	DHE3	Glutamate dehydrogenase 1, mitochondrial (GDH 1) (EC 1.4.1.3)	32	16	122	0.157635	0.313725	-0.15609	-0.992911	30	174
2221	P48735	3418	IDH2	IDHP	Isocitrate dehydrogenase [NADP], mitochondrial (IDH) (EC 1.1.1.42) (ICD-M) (IDP) (NADP(+)-specific ICDH) (Oxalosuccinate decarboxylase)	42	15	122	0.206897	0.294118	-0.0872211	-0.507484	20	317
2717	P15529	4179	CD46	MCP	Membrane cofactor protein (TLX) (Trophoblast leukocyte common antigen) (CD antigen CD46)	39	6	122	0.192118	0.117647	0.0744712	0.707529	0	132
3577	P60891	5631	PRPS1	PRPS1	Ribose-phosphate pyrophosphokinase 1 (EC 2.7.6.1) (PPRibP) (Phosphoribosyl pyrophosphate synthase I) (PRS-I)	29	11	122	0.142857	0.215686	-0.0728291	-0.594361	35	205
3598	Q92743	5654	HTRA1	HTRA1	Serine protease HTRA1 (EC 3.4.21.-) (High-temperature requirement A serine peptidase 1) (L56) (Serine protease 11)	45	4	122	0.221675	0.0784314	0.143244	1.49894	60	205
4433	P51571	6748	SSR4	SSRD	Translocon-associated protein subunit delta (TRAP-delta) (Signal sequence receptor subunit delta) (SSR-delta)	29	10	122	0.142857	0.196078	-0.0532213	-0.456858	0	138
5427	Q92820	8836	GGH	GGH	Gamma-glutamyl hydrolase (EC 3.4.19.9) (Conjugase) (GH) (Gamma-Glu-X carboxypeptidase)	41	12	122	0.20197	0.235294	-0.0333237	-0.220321	0	134
5786	Q9Y287	9445	ITM2B	ITM2B	Integral membrane protein 2B (Immature BRI2) (imBRI2) (Protein E25B) (Transmembrane protein BRI) (Bri) [Cleaved into: BRI2, membrane form (Mature BRI2) (mBRI2); BRI2 intracellular domain (BRI2 ICD); BRI2C, soluble form; Bri23 peptide (Bri2-23) (ABri23) (C-terminal peptide) (P23 peptide)]	35	5	122	0.172414	0.0980392	0.0743746	0.814444	0	175
5948	Q7L1Q6	9689	BZW1	BZW1	Basic leucine zipper and W2 domain-containing protein 1 (Protein Orf)	37	8	122	0.182266	0.156863	0.0254033	0.216543	0	164
6634	O15498	10652	YKT6	YKT6	Synaptobrevin homolog YKT6 (EC 2.3.1.-)	39	8	122	0.192118	0.156863	0.0352555	0.292492	0	297
1013	P68400	1457	CSNK2A1	CSK21	Casein kinase II subunit alpha (CK II alpha) (EC 2.7.11.1)	35	12	121	0.172414	0.235294	-0.0628803	-0.44859	0	199
1108	Q14118	1605	DAG1	DAG1	Dystroglycan (Dystrophin-associated glycoprotein 1) [Cleaved into: Alpha-dystroglycan (Alpha-DG); Beta-dystroglycan (Beta-DG)]	46	5	121	0.226601	0.0980392	0.128562	1.20872	0	144
1480	Q9Y285	2193	FARSA	SYFA	Phenylalanine--tRNA ligase alpha subunit (EC 6.1.1.20) (CML33) (Phenylalanyl-tRNA synthetase alpha subunit) (PheRS)	31	9	121	0.152709	0.176471	-0.0237612	-0.208639	8	157
1924	Q99714	3028	HSD17B10	HCD2	3-hydroxyacyl-CoA dehydrogenase type-2 (EC 1.1.1.35) (17-beta-hydroxysteroid dehydrogenase 10) (17-beta-HSD 10) (EC 1.1.1.51) (3-hydroxy-2-methylbutyryl-CoA dehydrogenase) (EC 1.1.1.178) (3-hydroxyacyl-CoA dehydrogenase type II) (Endoplasmic reticulum-associated amyloid beta-peptide-binding protein) (Mitochondrial ribonuclease P protein 2) (Mitochondrial RNase P protein 2) (Short chain dehydrogen…	31	11	121	0.152709	0.215686	-0.0629769	-0.498146	5	151
2099	P09429	3146	HMGB1	HMGB1	High mobility group protein B1 (High mobility group protein 1) (HMG-1)	33	10	121	0.162562	0.196078	-0.0335169	-0.270445	0	182
3634	P28062	5696	PSMB8	PSB8	Proteasome subunit beta type-8 (EC 3.4.25.1) (Low molecular mass protein 7) (Macropain subunit C13) (Multicatalytic endopeptidase complex subunit C13) (Proteasome component C13) (Proteasome subunit beta-5i) (Really interesting new gene 10 protein)	33	8	121	0.162562	0.156863	0.00569883	0.0514835	0	287
4048	P62857	6234	RPS28	RS28	40S ribosomal protein S28 (Small ribosomal subunit protein eS28)	35	6	121	0.172414	0.117647	0.0547667	0.55141	0	153
4215	P63208	6500	SKP1	SKP1	S-phase kinase-associated protein 1 (Cyclin-A/CDK2-associated protein p19) (p19A) (Organ of Corti protein 2) (OCP-2) (Organ of Corti protein II) (OCP-II) (RNA polymerase II elongation factor-like protein) (SIII) (Transcription elongation factor B polypeptide 1-like) (p19skp1)	33	5	121	0.162562	0.0980392	0.0645224	0.729555	0	153
4343	O60749	6643	SNX2	SNX2	Sorting nexin-2 (Transformation-related gene 9 protein) (TRG-9)	39	6	121	0.192118	0.117647	0.0744712	0.707529	0	206
4678	P11387	7150	TOP1	TOP1	DNA topoisomerase 1 (EC 5.99.1.2) (DNA topoisomerase I)	49	7	121	0.241379	0.137255	0.104124	0.814444	0	151
6450	O75608	10434	LYPLA1	LYPA1	Acyl-protein thioesterase 1 (APT-1) (hAPT1) (EC 3.1.2.-) (Lysophospholipase 1) (Lysophospholipase I) (LPL-I) (LysoPLA I)	33	9	121	0.162562	0.176471	-0.013909	-0.118441	0	173
6690	O14908	10755	GIPC1	GIPC1	PDZ domain-containing protein GIPC1 (GAIP C-terminus-interacting protein) (RGS-GAIP-interacting protein) (RGS19-interacting protein 1) (Synectin) (Tax interaction protein 2) (TIP-2)	56	6	121	0.275862	0.117647	0.158215	1.22948	0	160
8231	Q9UJU6	28988	DBNL	DBNL	Drebrin-like protein (Cervical SH3P7) (Cervical mucin-associated protein) (Drebrin-F) (HPK1-interacting protein of 55 kDa) (HIP-55) (SH3 domain-containing protein 7)	34	9	121	0.167488	0.176471	-0.0089829	-0.0753727	0	151
348	P00966	445	ASS1	ASSY	Argininosuccinate synthase (EC 6.3.4.5) (Citrulline--aspartate ligase)	54	11	120	0.26601	0.215686	0.0503236	0.302545	16	152
990	Q08257	1429	CRYZ	QOR	Quinone oxidoreductase (EC 1.6.5.5) (NADPH:quinone reductase) (Zeta-crystallin)	47	9	120	0.231527	0.176471	0.0550565	0.391753	15	325
1214	Q13409	1781	DYNC1I2	DC1I2	Cytoplasmic dynein 1 intermediate chain 2 (Cytoplasmic dynein intermediate chain 2) (Dynein intermediate chain 2, cytosolic) (DH IC-2)	36	6	120	0.17734	0.117647	0.0596928	0.592052	0	154
2594	Q9UIQ6	4012	LNPEP	LCAP	Leucyl-cystinyl aminopeptidase (Cystinyl aminopeptidase) (EC 3.4.11.3) (Insulin-regulated membrane aminopeptidase) (Insulin-responsive aminopeptidase) (IRAP) (Oxytocinase) (OTase) (Placental leucine aminopeptidase) (P-LAP) [Cleaved into: Leucyl-cystinyl aminopeptidase, pregnancy serum form]	37	12	120	0.182266	0.235294	-0.0530281	-0.36842	17	405
2787	P08473	4311	MME	NEP	Neprilysin (EC 3.4.24.11) (Atriopeptidase) (Common acute lymphocytic leukemia antigen) (CALLA) (Enkephalinase) (Neutral endopeptidase 24.11) (NEP) (Neutral endopeptidase) (Skin fibroblast elastase) (SFE) (CD antigen CD10)	53	3	120	0.261084	0.0588235	0.20226	2.15005	10	216
2823	P33527	4363	ABCC1	MRP1	Multidrug resistance-associated protein 1 (ATP-binding cassette sub-family C member 1) (Leukotriene C(4) transporter) (LTC4 transporter)	40	10	120	0.197044	0.196078	0.000965904	0.00708942	15	248
3976	P63173	6169	RPL38	RL38	60S ribosomal protein L38 (Large ribosomal subunit protein eL38)	29	8	120	0.142857	0.156863	-0.0140056	-0.13493	0	147
4022	P62841	6209	RPS15	RS15	40S ribosomal protein S15 (RIG protein) (Small ribosomal subunit protein uS19)	28	6	120	0.137931	0.117647	0.020284	0.229482	16	146
4189	Q99961	6455	SH3GL1	SH3G1	Endophilin-A2 (EEN fusion partner of MLL) (Endophilin-2) (Extra eleven-nineteen leukemia fusion gene protein) (EEN) (SH3 domain protein 2B) (SH3 domain-containing GRB2-like protein 1)	47	5	120	0.231527	0.0980392	0.133488	1.23975	0	165
7509	O75533	23451	SF3B1	SF3B1	Splicing factor 3B subunit 1 (Pre-mRNA-splicing factor SF3b 155 kDa subunit) (SF3b155) (Spliceosome-associated protein 155) (SAP 155)	36	8	120	0.17734	0.156863	0.0204772	0.177014	0	156
8511	Q9Y6G9	51143	DYNC1LI1	DC1L1	Cytoplasmic dynein 1 light intermediate chain 1 (LIC1) (Dynein light chain A) (DLC-A) (Dynein light intermediate chain 1, cytosolic)	38	6	120	0.187192	0.117647	0.0695451	0.670054	0	166
10800	Q9BPX5	81873	ARPC5L	ARP5L	Actin-related protein 2/3 complex subunit 5-like protein (Arp2/3 complex 16 kDa subunit 2) (ARC16-2)	37	10	120	0.182266	0.196078	-0.0138124	-0.105385	0	216
1631	P51570	2584	GALK1	GALK1	Galactokinase (EC 2.7.1.6) (Galactose kinase)	52	6	119	0.256158	0.117647	0.138511	1.12257	6	169
1968	P07686	3074	HEXB	HEXB	Beta-hexosaminidase subunit beta (EC 3.2.1.52) (Beta-N-acetylhexosaminidase subunit beta) (Hexosaminidase subunit B) (Cervical cancer proto-oncogene 7 protein) (HCC-7) (N-acetyl-beta-glucosaminidase subunit beta) [Cleaved into: Beta-hexosaminidase subunit beta chain B; Beta-hexosaminidase subunit beta chain A]	29	9	119	0.142857	0.176471	-0.0336134	-0.304855	1	164
2381	Q14624	3700	ITIH4	ITIH4	Inter-alpha-trypsin inhibitor heavy chain H4 (ITI heavy chain H4) (ITI-HC4) (Inter-alpha-inhibitor heavy chain 4) (Inter-alpha-trypsin inhibitor family heavy chain-related protein) (IHRP) (Plasma kallikrein sensitive glycoprotein 120) (Gp120) (PK-120) [Cleaved into: 70 kDa inter-alpha-trypsin inhibitor heavy chain H4; 35 kDa inter-alpha-trypsin inhibitor heavy chain H4]	66	8	119	0.325123	0.156863	0.16826	1.05148	4	296
3759	P09417	5860	QDPR	DHPR	Dihydropteridine reductase (EC 1.5.1.34) (HDHPR) (Quinoid dihydropteridine reductase) (Short chain dehydrogenase/reductase family 33C member 1)	41	9	119	0.20197	0.176471	0.0254999	0.194716	0	140
4268	P55011	6558	SLC12A2	S12A2	Solute carrier family 12 member 2 (Basolateral Na-K-Cl symporter) (Bumetanide-sensitive sodium-(potassium)-chloride cotransporter 1)	45	6	119	0.221675	0.117647	0.104028	0.91398	7	343
4414	P37108	6727	SRP14	SRP14	Signal recognition particle 14 kDa protein (SRP14) (18 kDa Alu RNA-binding protein)	27	5	119	0.133005	0.0980392	0.0349657	0.440049	0	131
4696	O43399	7165	TPD52L2	TPD54	Tumor protein D54 (hD54) (Tumor protein D52-like 2)	32	5	119	0.157635	0.0980392	0.0595963	0.685161	0	158
5420	O14786	8829	NRP1	NRP1	Neuropilin-1 (Vascular endothelial cell growth factor 165 receptor) (CD antigen CD304)	38	11	119	0.187192	0.215686	-0.0284942	-0.204415	0	160
6842	Q96AC1	10979	FERMT2	FERM2	Fermitin family homolog 2 (Kindlin-2) (Mitogen-inducible gene 2 protein) (MIG-2) (Pleckstrin homology domain-containing family C member 1) (PH domain-containing family C member 1)	47	7	119	0.231527	0.137255	0.0942722	0.754323	0	276
8277	Q9UKS6	29763	PACSIN3	PACN3	Protein kinase C and casein kinase substrate in neurons protein 3 (SH3 domain-containing protein 6511)	51	6	119	0.251232	0.117647	0.133584	1.09455	0	230
11801	Q8WV92	129531	MITD1	MITD1	MIT domain-containing protein 1	50	4	119	0.246305	0.0784314	0.167874	1.65095	0	141
155	P00352	216	ALDH1A1	AL1A1	Retinal dehydrogenase 1 (RALDH 1) (RalDH1) (EC 1.2.1.-) (EC 1.2.1.36) (ALDH-E1) (ALHDII) (Aldehyde dehydrogenase family 1 member A1) (Aldehyde dehydrogenase, cytosolic)	54	8	118	0.26601	0.156863	0.109147	0.761977	54	361
383	P49419	501	ALDH7A1	AL7A1	Alpha-aminoadipic semialdehyde dehydrogenase (Alpha-AASA dehydrogenase) (EC 1.2.1.31) (Aldehyde dehydrogenase family 7 member A1) (EC 1.2.1.3) (Antiquitin-1) (Betaine aldehyde dehydrogenase) (EC 1.2.1.8) (Delta1-piperideine-6-carboxylate dehydrogenase) (P6c dehydrogenase)	40	7	118	0.197044	0.137255	0.0597894	0.521663	54	361
1147	P26196	1656	DDX6	DDX6	Probable ATP-dependent RNA helicase DDX6 (EC 3.6.4.13) (ATP-dependent RNA helicase p54) (DEAD box protein 6) (Oncogene RCK)	35	7	118	0.172414	0.137255	0.0351589	0.329018	0	143
4382	P35270	6697	SPR	SPRE	Sepiapterin reductase (SPR) (EC 1.1.1.153)	36	8	118	0.17734	0.156863	0.0204772	0.177014	0	146
5653	Q9P0L0	9218	VAPA	VAPA	Vesicle-associated membrane protein-associated protein A (VAMP-A) (VAMP-associated protein A) (VAP-A) (33 kDa VAMP-associated protein) (VAP-33)	37	7	118	0.182266	0.137255	0.0450111	0.409188	0	147
5866	O75348	9550	ATP6V1G1	VATG1	V-type proton ATPase subunit G 1 (V-ATPase subunit G 1) (V-ATPase 13 kDa subunit 1) (Vacuolar proton pump subunit G 1) (Vacuolar proton pump subunit M16)	33	5	118	0.162562	0.0980392	0.0645224	0.729555	0	146
6010	P43243	9782	MATR3	MATR3	Matrin-3	30	6	118	0.147783	0.117647	0.0301362	0.329018	0	143
6262	Q9Y6W5	10163	WASF2	WASF2	Wiskott-Aldrich syndrome protein family member 2 (WASP family protein member 2) (Protein WAVE-2) (Verprolin homology domain-containing protein 2)	41	5	118	0.20197	0.0980392	0.103931	1.04271	0	147
10868	Q86UX7	83706	FERMT3	URP2	Fermitin family homolog 3 (Kindlin-3) (MIG2-like protein) (Unc-112-related protein 2)	43	16	118	0.211823	0.313725	-0.101903	-0.566646	0	276
1189	Q12959	1739	DLG1	DLG1	Disks large homolog 1 (Synapse-associated protein 97) (SAP-97) (SAP97) (hDlg)	48	8	117	0.236453	0.156863	0.0795905	0.592052	1	235
1942	P02042	3045	HBD	HBD	Hemoglobin subunit delta (Delta-globin) (Hemoglobin delta chain)	53	9	117	0.261084	0.176471	0.0846132	0.565085	3	444
4157	Q01105	6418	SET	SET	Protein SET (HLA-DR-associated protein II) (Inhibitor of granzyme A-activated DNase) (IGAAD) (PHAPII) (Phosphatase 2A inhibitor I2PP2A) (I-2PP2A) (Template-activating factor I) (TAF-I)	31	8	117	0.152709	0.156863	-0.00415339	-0.0387143	0	156
4530	O75347	6902	TBCA	TBCA	Tubulin-specific chaperone A (TCP1-chaperonin cofactor A) (Tubulin-folding cofactor A) (CFA)	29	5	117	0.142857	0.0980392	0.0448179	0.543142	0	127
5348	O60493	8724	SNX3	SNX3	Sorting nexin-3 (Protein SDP3)	35	5	117	0.172414	0.0980392	0.0743746	0.814444	0	206
5857	O95816	9532	BAG2	BAG2	BAG family molecular chaperone regulator 2 (BAG-2) (Bcl-2-associated athanogene 2)	29	6	117	0.142857	0.117647	0.0252101	0.280108	0	140
6790	Q99627	10920	COPS8	CSN8	COP9 signalosome complex subunit 8 (SGN8) (Signalosome subunit 8) (COP9 homolog) (hCOP9) (JAB1-containing signalosome subunit 8)	28	6	117	0.137931	0.117647	0.020284	0.229482	0	143
6915	O95084	11098	PRSS23	PRS23	Serine protease 23 (EC 3.4.21.-) (Putative secreted protein Zsig13)	36	5	117	0.17734	0.0980392	0.0793007	0.855086	0	137
9773	Q9UL26	57403	RAB22A	RB22A	Ras-related protein Rab-22A (Rab-22)	36	6	117	0.17734	0.117647	0.0596928	0.592052	0	394
2142	P37235	3241	HPCAL1	HPCL1	Hippocalcin-like protein 1 (Calcium-binding protein BDR-1) (HLP2) (Visinin-like protein 3) (VILIP-3)	37	6	116	0.182266	0.117647	0.064619	0.63158	0	452
2539	P16949	3925	STMN1	STMN1	Stathmin (Leukemia-associated phosphoprotein p18) (Metablastin) (Oncoprotein 18) (Op18) (Phosphoprotein p19) (pp19) (Prosolin) (Protein Pr22) (pp17)	34	8	116	0.167488	0.156863	0.0106249	0.0945523	0	128
2914	O94832	4642	MYO1D	MYO1D	Unconventional myosin-Id	46	9	116	0.226601	0.176471	0.0501304	0.360726	0	508
4652	O43657	7105	TSPAN6	TSN6	Tetraspanin-6 (Tspan-6) (A15 homolog) (Putative NF-kappa-B-activating protein 321) (T245 protein) (Tetraspanin TM4-D) (Transmembrane 4 superfamily member 6)	46	8	116	0.226601	0.156863	0.0697382	0.530651	0	453
4912	Q9NQW7	7511	XPNPEP1	XPP1	Xaa-Pro aminopeptidase 1 (EC 3.4.11.9) (Aminoacylproline aminopeptidase) (Cytosolic aminopeptidase P) (Soluble aminopeptidase P) (sAmp) (X-Pro aminopeptidase 1) (X-prolyl aminopeptidase 1, soluble)	45	7	116	0.221675	0.137255	0.08442	0.691588	8	248
5096	Q13492	8301	PICALM	PICAL	Phosphatidylinositol-binding clathrin assembly protein (Clathrin assembly lymphoid myeloid leukemia protein)	31	10	116	0.152709	0.196078	-0.0433691	-0.360642	0	150
7076	P61923	22818	COPZ1	COPZ1	Coatomer subunit zeta-1 (Zeta-1-coat protein) (Zeta-1 COP)	18	10	116	0.08867	0.196078	-0.107408	-1.14491	0	142
543	P53801	754	PTTG1IP	PTTG	Pituitary tumor-transforming gene 1 protein-interacting protein (Pituitary tumor-transforming gene protein-binding factor) (PBF) (PTTG-binding factor)	42	6	115	0.206897	0.117647	0.0892495	0.814444	0	138
1276	P30084	1892	ECHS1	ECHM	Enoyl-CoA hydratase, mitochondrial (EC 4.2.1.17) (Enoyl-CoA hydratase 1) (Short-chain enoyl-CoA hydratase) (SCEH)	27	14	115	0.133005	0.27451	-0.141505	-1.04538	18	219
2602	Q9Y4K0	4017	LOXL2	LOXL2	Lysyl oxidase homolog 2 (EC 1.4.3.13) (Lysyl oxidase-like protein 2) (Lysyl oxidase-related protein 2) (Lysyl oxidase-related protein WS9-14)	32	7	115	0.157635	0.137255	0.0203806	0.199735	0	143
3087	P46459	4905	NSF	NSF	Vesicle-fusing ATPase (EC 3.6.4.6) (N-ethylmaleimide-sensitive fusion protein) (NEM-sensitive fusion protein) (Vesicular-fusion protein NSF)	43	11	115	0.211823	0.215686	-0.00386361	-0.0260774	0	479
3450	P10619	5476	CTSA	PPGB	Lysosomal protective protein (EC 3.4.16.5) (Carboxypeptidase C) (Carboxypeptidase L) (Cathepsin A) (Protective protein cathepsin A) (PPCA) (Protective protein for beta-galactosidase) [Cleaved into: Lysosomal protective protein 32 kDa chain; Lysosomal protective protein 20 kDa chain]	34	8	115	0.167488	0.156863	0.0106249	0.0945523	0	187
6233	Q12931	10131	TRAP1	TRAP1	Heat shock protein 75 kDa, mitochondrial (HSP 75) (TNFR-associated protein 1) (Tumor necrosis factor type 1 receptor-associated protein) (TRAP-1)	32	10	115	0.157635	0.196078	-0.038443	-0.314839	31	526
6822	Q15363	10959	TMED2	TMED2	Transmembrane emp24 domain-containing protein 2 (Membrane protein p24A) (p24) (p24 family protein beta-1) (p24beta1)	36	6	115	0.17734	0.117647	0.0596928	0.592052	0	138
7035	O14579	11316	COPE	COPE	Coatomer subunit epsilon (Epsilon-coat protein) (Epsilon-COP)	26	5	115	0.128079	0.0980392	0.0300396	0.385601	0	146
7598	Q9Y5K6	23607	CD2AP	CD2AP	CD2-associated protein (Adapter protein CMS) (Cas ligand with multiple SH3 domains)	56	4	115	0.275862	0.0784314	0.197431	1.81444	0	156
9394	Q96P70	55705	IPO9	IPO9	Importin-9 (Imp9) (Ran-binding protein 9) (RanBP9)	38	9	115	0.187192	0.176471	0.0107215	0.0850919	0	266
11128	Q9BRA2	84817	TXNDC17	TXD17	Thioredoxin domain-containing protein 17 (14 kDa thioredoxin-related protein) (TRP14) (Protein 42-9-9) (Thioredoxin-like protein 5)	33	7	115	0.162562	0.137255	0.0253067	0.244129	0	130
12805	Q3ZCM7	347688	TUBB8	TBB8	Tubulin beta-8 chain (Tubulin beta 8 class VIII)	18	8	115	0.08867	0.156863	-0.0681928	-0.822986	0	544
12807	Q9BVA1	347733	TUBB2B	TBB2B	Tubulin beta-2B chain	24	1	115	0.118227	0.0196078	0.0986188	2.59205	0	544
371	P16615	488	ATP2A2	AT2A2	Sarcoplasmic/endoplasmic reticulum calcium ATPase 2 (SERCA2) (SR Ca(2+)-ATPase 2) (EC 3.6.3.8) (Calcium pump 2) (Calcium-transporting ATPase sarcoplasmic reticulum type, slow twitch skeletal muscle isoform) (Endoplasmic reticulum class 1/2 Ca(2+) ATPase)	36	12	114	0.17734	0.235294	-0.0579542	-0.407948	7	447
1017	P67870	1460	CSNK2B	CSK2B	Casein kinase II subunit beta (CK II beta) (Phosvitin) (Protein G5a)	41	5	114	0.20197	0.0980392	0.103931	1.04271	0	144
1755	P63218	2787	GNG5	GBG5	Guanine nucleotide-binding protein G(I)/G(S)/G(O) subunit gamma-5	36	7	114	0.17734	0.137255	0.040085	0.36966	0	271
2266	P01871	3507	IGHM	IGHM	Immunoglobulin heavy constant mu (Ig mu chain C region) (Ig mu chain C region GAL) (Ig mu chain C region OU)	49	17	114	0.241379	0.333333	-0.091954	-0.465664	0	114
3969	P49207	6164	RPL34	RL34	60S ribosomal protein L34 (Large ribosomal subunit protein eL34)	33	6	114	0.162562	0.117647	0.0449145	0.466521	0	141
4867	Q9Y277	7419	VDAC3	VDAC3	Voltage-dependent anion-selective channel protein 3 (VDAC-3) (hVDAC3) (Outer mitochondrial membrane protein porin 3)	30	13	114	0.147783	0.254902	-0.107119	-0.78646	0	246
5080	Q93008	8239	USP9X	USP9X	Probable ubiquitin carboxyl-terminal hydrolase FAF-X (EC 3.4.19.12) (Deubiquitinating enzyme FAF-X) (Fat facets in mammals) (hFAM) (Fat facets protein-related, X-linked) (Ubiquitin thioesterase FAF-X) (Ubiquitin-specific protease 9, X chromosome) (Ubiquitin-specific-processing protease FAF-X)	49	6	114	0.241379	0.117647	0.123732	1.03684	0	197
6279	P61289	10197	PSME3	PSME3	Proteasome activator complex subunit 3 (11S regulator complex subunit gamma) (REG-gamma) (Activator of multicatalytic protease subunit 3) (Ki nuclear autoantigen) (Proteasome activator 28 subunit gamma) (PA28g) (PA28gamma)	29	7	114	0.142857	0.137255	0.00560224	0.0577155	0	266
6304	O60664	10226	PLIN3	PLIN3	Perilipin-3 (47 kDa mannose 6-phosphate receptor-binding protein) (47 kDa MPR-binding protein) (Cargo selection protein TIP47) (Mannose-6-phosphate receptor-binding protein 1) (Placental protein 17) (PP17)	36	7	114	0.17734	0.137255	0.040085	0.36966	0	138
6488	Q15436	10484	SEC23A	SC23A	Protein transport protein Sec23A (SEC23-related protein A)	30	7	114	0.147783	0.137255	0.0105283	0.106625	0	181
6512	Q99828	10519	CIB1	CIB1	Calcium and integrin-binding protein 1 (CIB) (Calcium- and integrin-binding protein) (CIBP) (Calmyrin) (DNA-PKcs-interacting protein) (Kinase-interacting protein) (KIP) (SNK-interacting protein 2-28) (SIP2-28)	45	8	114	0.221675	0.156863	0.0648121	0.498943	0	452
6833	Q07065	10970	CKAP4	CKAP4	Cytoskeleton-associated protein 4 (63-kDa cytoskeleton-linking membrane protein) (Climp-63) (p63)	36	13	114	0.17734	0.254902	-0.0775621	-0.523425	0	127
9994	Q9UNH7	58533	SNX6	SNX6	Sorting nexin-6 (TRAF4-associated factor 2) [Cleaved into: Sorting nexin-6, N-terminally processed]	36	3	114	0.17734	0.0588235	0.118516	1.59205	0	164
12499	Q8N9N7	255252	LRRC57	LRC57	Leucine-rich repeat-containing protein 57	40	7	114	0.197044	0.137255	0.0597894	0.521663	6	457
212	P12236	293	SLC25A6	ADT3	ADP/ATP translocase 3 (ADP,ATP carrier protein 3) (ADP,ATP carrier protein, isoform T2) (ANT 2) (Adenine nucleotide translocator 3) (ANT 3) (Solute carrier family 25 member 6) [Cleaved into: ADP/ATP translocase 3, N-terminally processed]	30	9	113	0.147783	0.176471	-0.0286873	-0.255945	0	227
344	P08243	440	ASNS	ASNS	Asparagine synthetase [glutamine-hydrolyzing] (EC 6.3.5.4) (Cell cycle control protein TS11) (Glutamine-dependent asparagine synthetase)	38	8	113	0.187192	0.156863	0.0303294	0.255017	4	162
422	P25311	563	AZGP1	ZA2G	Zinc-alpha-2-glycoprotein (Zn-alpha-2-GP) (Zn-alpha-2-glycoprotein)	52	11	113	0.256158	0.215686	0.0404714	0.248098	0	127
462	Q13867	642	BLMH	BLMH	Bleomycin hydrolase (BH) (BLM hydrolase) (BMH) (EC 3.4.22.40)	37	9	113	0.182266	0.176471	0.00579542	0.0466178	3	142
1179	O60610	1729	DIAPH1	DIAP1	Protein diaphanous homolog 1 (Diaphanous-related formin-1) (DRF1)	39	13	113	0.192118	0.254902	-0.0627837	-0.407948	0	154
1705	Q92896	2734	GLG1	GSLG1	Golgi apparatus protein 1 (CFR-1) (Cysteine-rich fibroblast growth factor receptor) (E-selectin ligand 1) (ESL-1) (Golgi sialoglycoprotein MG-160)	44	7	113	0.216749	0.137255	0.0794939	0.659166	0	138
1861	P21266	2947	GSTM3	GSTM3	Glutathione S-transferase Mu 3 (EC 2.5.1.18) (GST class-mu 3) (GSTM3-3) (hGSTM3-3)	42	8	113	0.206897	0.156863	0.0500338	0.399407	0	206
3098	Q02818	4924	NUCB1	NUCB1	Nucleobindin-1 (CALNUC)	31	8	113	0.152709	0.156863	-0.00415339	-0.0387143	0	149
3740	P15151	5817	PVR	PVR	Poliovirus receptor (Nectin-like protein 5) (NECL-5) (CD antigen CD155)	39	7	113	0.192118	0.137255	0.0548633	0.485137	0	121
4036	P63220	6227	RPS21	RS21	40S ribosomal protein S21 (Small ribosomal subunit protein eS21)	28	4	113	0.137931	0.0784314	0.0594997	0.814444	0	139
5612	O43760	9144	SYNGR2	SNG2	Synaptogyrin-2 (Cellugyrin)	34	5	113	0.167488	0.0980392	0.0694485	0.772624	0	132
5807	O75116	9475	ROCK2	ROCK2	Rho-associated protein kinase 2 (EC 2.7.11.1) (Rho kinase 2) (Rho-associated, coiled-coil-containing protein kinase 2) (Rho-associated, coiled-coil-containing protein kinase II) (ROCK-II) (p164 ROCK-2)	40	9	113	0.197044	0.176471	0.0205737	0.159093	0	191
6994	P42766	11224	RPL35	RL35	60S ribosomal protein L35 (Large ribosomal subunit protein uL29)	39	6	113	0.192118	0.117647	0.0744712	0.707529	16	141
8534	Q7Z4W1	51181	DCXR	DCXR	L-xylulose reductase (XR) (EC 1.1.1.10) (Carbonyl reductase II) (Dicarbonyl/L-xylulose reductase) (Kidney dicarbonyl reductase) (kiDCR) (Short chain dehydrogenase/reductase family 20C member 1) (Sperm surface protein P34H)	50	8	113	0.246305	0.156863	0.0894427	0.650946	0	138
8730	Q9Y224	51637	RTRAF	CN166	UPF0568 protein C14orf166 (CLE7 homolog) (CLE)	33	6	113	0.162562	0.117647	0.0449145	0.466521	0	138
8855	Q96QD8	54407	SLC38A2	S38A2	Sodium-coupled neutral amino acid transporter 2 (Amino acid transporter A2) (Protein 40-9-1) (Solute carrier family 38 member 2) (System A amino acid transporter 2) (System A transporter 1) (System N amino acid transporter 2)	48	5	113	0.236453	0.0980392	0.138414	1.27012	2	217
262	P05090	347	APOD	APOD	Apolipoprotein D (Apo-D) (ApoD)	48	6	112	0.236453	0.117647	0.118806	1.00709	13	127
1336	Q04637	1981	EIF4G1	IF4G1	Eukaryotic translation initiation factor 4 gamma 1 (eIF-4-gamma 1) (eIF-4G 1) (eIF-4G1) (p220)	41	6	112	0.20197	0.117647	0.0843234	0.779679	0	158
3257	O15067	5198	PFAS	PUR4	Phosphoribosylformylglycinamidine synthase (FGAM synthase) (FGAMS) (EC 6.3.5.3) (Formylglycinamide ribonucleotide amidotransferase) (FGAR amidotransferase) (FGAR-AT) (Formylglycinamide ribotide amidotransferase)	35	8	112	0.172414	0.156863	0.015551	0.136372	12	141
3506	P48147	5550	PREP	PPCE	Prolyl endopeptidase (PE) (EC 3.4.21.26) (Post-proline cleaving enzyme)	41	10	112	0.20197	0.196078	0.00589201	0.0427133	4	151
3691	Q13308	5754	PTK7	PTK7	Inactive tyrosine-protein kinase 7 (Colon carcinoma kinase 4) (CCK-4) (Protein-tyrosine kinase 7) (Pseudo tyrosine kinase receptor 7) (Tyrosine-protein kinase-like 7)	48	3	112	0.236453	0.0588235	0.17763	2.00709	10	419
3964	P47914	6159	RPL29	RL29	60S ribosomal protein L29 (Cell surface heparin-binding protein HIP) (Large ribosomal subunit protein eL29)	38	4	112	0.187192	0.0784314	0.108761	1.25502	0	136
4335	P62304	6635	SNRPE	RUXE	Small nuclear ribonucleoprotein E (snRNP-E) (Sm protein E) (Sm-E) (SmE)	28	7	112	0.137931	0.137255	0.000676133	0.00708942	0	249
4349	P04179	6648	SOD2	SODM	Superoxide dismutase [Mn], mitochondrial (EC 1.15.1.1)	33	12	112	0.162562	0.235294	-0.0727325	-0.533479	35	144
5819	Q9Y6M7	9497	SLC4A7	S4A7	Sodium bicarbonate cotransporter 3 (Electroneutral Na/HCO(3) cotransporter) (Sodium bicarbonate cotransporter 2) (Sodium bicarbonate cotransporter 2b) (Bicarbonate transporter) (Solute carrier family 4 member 7)	36	10	112	0.17734	0.196078	-0.0187385	-0.144914	0	253
6230	P42704	10128	LRPPRC	LPPRC	Leucine-rich PPR motif-containing protein, mitochondrial (130 kDa leucine-rich protein) (LRP 130) (GP130)	29	12	112	0.142857	0.235294	-0.092437	-0.719892	0	127
6243	Q13283	10146	G3BP1	G3BP1	Ras GTPase-activating protein-binding protein 1 (G3BP-1) (EC 3.6.4.12) (EC 3.6.4.13) (ATP-dependent DNA helicase VIII) (hDH VIII) (GAP SH3 domain-binding protein 1)	28	5	112	0.137931	0.0980392	0.0398918	0.492516	0	141
6388	Q92734	10342	TFG	TFG	Protein TFG (TRK-fused gene protein)	32	7	112	0.157635	0.137255	0.0203806	0.199735	0	138
8711	Q86X29	51599	LSR	LSR	Lipolysis-stimulated lipoprotein receptor	55	6	112	0.270936	0.117647	0.153289	1.20349	0	126
9797	Q8N1G4	57470	LRRC47	LRC47	Leucine-rich repeat-containing protein 47	38	4	112	0.187192	0.0784314	0.108761	1.25502	6	457
10758	Q8NBS9	81567	TXNDC5	TXND5	Thioredoxin domain-containing protein 5 (Endoplasmic reticulum resident protein 46) (ER protein 46) (ERp46) (Thioredoxin-like protein p46)	32	14	112	0.157635	0.27451	-0.116874	-0.800265	41	438
11044	Q9H1C7	84418	CYSTM1	CYTM1	Cysteine-rich and transmembrane domain-containing protein 1	37	5	112	0.182266	0.0980392	0.0842268	0.894615	0	116
139	P54819	204	AK2	KAD2	Adenylate kinase 2, mitochondrial (AK 2) (EC 2.7.4.3) (ATP-AMP transphosphorylase 2) (ATP:AMP phosphotransferase) (Adenylate monophosphate kinase) [Cleaved into: Adenylate kinase 2, mitochondrial, N-terminally processed]	24	12	111	0.118227	0.235294	-0.117068	-0.992911	10	259
510	P00736	715	#N/A	C1R	Complement C1r subcomponent (EC 3.4.21.41) (Complement component 1 subcomponent r) [Cleaved into: Complement C1r subcomponent heavy chain; Complement C1r subcomponent light chain]	40	10	111	0.197044	0.196078	0.000965904	0.00708942	7	514
1490	Q12805	2202	EFEMP1	FBLN3	EGF-containing fibulin-like extracellular matrix protein 1 (Extracellular protein S1-5) (Fibrillin-like protein) (Fibulin-3) (FIBL-3)	39	12	111	0.192118	0.235294	-0.0431759	-0.292471	0	125
1996	P05534	3105	#N/A	1A24	HLA class I histocompatibility antigen, A-24 alpha chain (Aw-24) (HLA class I histocompatibility antigen, A-9 alpha chain) (MHC class I antigen A*24)	21	5	111	0.103448	0.0980392	0.00540906	0.0774788	0	372
2844	Q13126	4507	MTAP	MTAP	S-methyl-5'-thioadenosine phosphorylase (EC 2.4.2.28) (5'-methylthioadenosine phosphorylase) (MTA phosphorylase) (MTAP) (MTAPase)	37	11	111	0.182266	0.215686	-0.0334203	-0.242889	1	247
4542	Q15369	6921	ELOC	ELOC	Elongin-C (EloC) (Elongin 15 kDa subunit) (RNA polymerase II transcription factor SIII subunit C) (SIII p15) (Transcription elongation factor B polypeptide 1)	25	6	111	0.123153	0.117647	0.00550565	0.0659831	0	130
5452	Q13501	8878	SQSTM1	SQSTM	Sequestosome-1 (EBI3-associated protein of 60 kDa) (EBIAP) (p60) (Phosphotyrosine-independent ligand for the Lck SH2 domain of 62 kDa) (Ubiquitin-binding protein p62)	39	4	111	0.192118	0.0784314	0.113687	1.29249	0	131
12614	Q6NZI2	284119	CAVIN1	PTRF	Polymerase I and transcript release factor (Cavin-1)	36	10	111	0.17734	0.196078	-0.0187385	-0.144914	0	141
13210	P0C0L5	100293534	C4B_2	CO4B	Complement C4-B (Basic complement C4) (C3 and PZP-like alpha-2-macroglobulin domain-containing protein 3) [Cleaved into: Complement C4 beta chain; Complement C4-B alpha chain; C4a anaphylatoxin; C4b-B; C4d-B; Complement C4 gamma chain]	46	11	111	0.226601	0.215686	0.0109147	0.0712198	0	452
256	P06727	337	APOA4	APOA4	Apolipoprotein A-IV (Apo-AIV) (ApoA-IV) (Apolipoprotein A4)	63	9	110	0.310345	0.176471	0.133874	0.814444	0	123
407	Q93050	535	ATP6V0A1	VPP1	V-type proton ATPase 116 kDa subunit a isoform 1 (V-ATPase 116 kDa isoform a1) (Clathrin-coated vesicle/synaptic vesicle proton pump 116 kDa subunit) (Vacuolar adenosine triphosphatase subunit Ac116) (Vacuolar proton pump subunit 1) (Vacuolar proton translocating ATPase 116 kDa subunit a isoform 1)	54	6	110	0.26601	0.117647	0.148363	1.17701	2	159
1429	P38117	2109	ETFB	ETFB	Electron transfer flavoprotein subunit beta (Beta-ETF)	27	12	110	0.133005	0.235294	-0.102289	-0.822986	13	134
1982	P61086	3093	UBE2K	UBE2K	Ubiquitin-conjugating enzyme E2 K (EC 2.3.2.23) (E2 ubiquitin-conjugating enzyme K) (Huntingtin-interacting protein 2) (HIP-2) (Ubiquitin carrier protein) (Ubiquitin-conjugating enzyme E2-25 kDa) (Ubiquitin-conjugating enzyme E2(25K)) (Ubiquitin-conjugating enzyme E2-25K) (Ubiquitin-protein ligase)	29	6	110	0.142857	0.117647	0.0252101	0.280108	0	276
5367	Q13443	8754	ADAM9	ADAM9	Disintegrin and metalloproteinase domain-containing protein 9 (ADAM 9) (EC 3.4.24.-) (Cellular disintegrin-related protein) (Meltrin-gamma) (Metalloprotease/disintegrin/cysteine-rich protein 9) (Myeloma cell metalloproteinase)	37	7	110	0.182266	0.137255	0.0450111	0.409188	0	155
8767	Q9ULC3	51715	RAB23	RAB23	Ras-related protein Rab-23	39	7	110	0.192118	0.137255	0.0548633	0.485137	0	127
9279	Q96AG4	55379	LRRC59	LRC59	Leucine-rich repeat-containing protein 59 (Ribosome-binding protein p34) (p34)	31	10	110	0.152709	0.196078	-0.0433691	-0.360642	0	127
184	P02760	259	AMBP	AMBP	Protein AMBP [Cleaved into: Alpha-1-microglobulin (Protein HC) (Alpha-1 microglycoprotein) (Complex-forming glycoprotein heterogeneous in charge); Inter-alpha-trypsin inhibitor light chain (ITI-LC) (Bikunin) (EDC1) (HI-30) (Uronic-acid-rich protein); Trypstatin]	51	9	109	0.251232	0.176471	0.0747609	0.50959	0	232
894	P08572	1284	COL4A2	CO4A2	Collagen alpha-2(IV) chain [Cleaved into: Canstatin]	40	8	109	0.197044	0.156863	0.0401816	0.329018	0	292
1681	P19440	2678	GGT1	GGT1	Gamma-glutamyltranspeptidase 1 (GGT 1) (EC 2.3.2.2) (Gamma-glutamyltransferase 1) (Glutathione hydrolase 1) (EC 3.4.19.13) (Leukotriene-C4 hydrolase) (EC 3.4.19.14) (CD antigen CD224) [Cleaved into: Gamma-glutamyltranspeptidase 1 heavy chain; Gamma-glutamyltranspeptidase 1 light chain]	47	2	109	0.231527	0.0392157	0.192311	2.56168	28	177
1926	P40939	3030	HADHA	ECHA	Trifunctional enzyme subunit alpha, mitochondrial (78 kDa gastrin-binding protein) (TP-alpha) [Includes: Long-chain enoyl-CoA hydratase (EC 4.2.1.17); Long chain 3-hydroxyacyl-CoA dehydrogenase (EC 1.1.1.211)]	32	10	109	0.157635	0.196078	-0.038443	-0.314839	18	219
2476	P05787	3856	KRT8	K2C8	Keratin, type II cytoskeletal 8 (Cytokeratin-8) (CK-8) (Keratin-8) (K8) (Type-II keratin Kb8)	50	8	109	0.246305	0.156863	0.0894427	0.650946	0	437
2489	Q04695	3872	KRT17	K1C17	Keratin, type I cytoskeletal 17 (39.1) (Cytokeratin-17) (CK-17) (Keratin-17) (K17)	39	11	109	0.192118	0.215686	-0.023568	-0.16694	0	343
3261	Q9UHV9	5202	PFDN2	PFD2	Prefoldin subunit 2	34	2	109	0.167488	0.0392157	0.128272	2.09455	0	123
3659	P48556	5714	PSMD8	PSMD8	26S proteasome non-ATPase regulatory subunit 8 (26S proteasome regulatory subunit RPN12) (26S proteasome regulatory subunit S14) (p31)	25	5	109	0.123153	0.0980392	0.0251135	0.329018	0	153
4229	P11169	6515	SLC2A3	GTR3	Solute carrier family 2, facilitated glucose transporter member 3 (Glucose transporter type 3, brain) (GLUT-3)	39	5	109	0.192118	0.0980392	0.094079	0.970564	6	370
4255	P30825	6541	SLC7A1	CTR1	High affinity cationic amino acid transporter 1 (CAT-1) (CAT1) (Ecotropic retroviral leukemia receptor homolog) (Ecotropic retrovirus receptor homolog) (Solute carrier family 7 member 1) (System Y+ basic amino acid transporter)	37	10	109	0.182266	0.196078	-0.0138124	-0.105385	7	343
5294	P63167	8655	DYNLL1	DYL1	Dynein light chain 1, cytoplasmic (8 kDa dynein light chain) (DLC8) (Dynein light chain LC8-type 1) (Protein inhibitor of neuronal nitric oxide synthase) (PIN)	30	5	109	0.147783	0.0980392	0.049744	0.592052	0	153
5426	P49915	8833	GMPS	GUAA	GMP synthase [glutamine-hydrolyzing] (EC 6.3.5.2) (GMP synthetase) (Glutamine amidotransferase)	41	3	109	0.20197	0.0588235	0.143147	1.77968	6	129
5634	O43684	9184	BUB3	BUB3	Mitotic checkpoint protein BUB3	28	6	109	0.137931	0.117647	0.020284	0.229482	0	138
6458	Q92520	10447	FAM3C	FAM3C	Protein FAM3C (Interleukin-like EMT inducer)	30	6	109	0.147783	0.117647	0.0301362	0.329018	0	117
6589	Q6P2Q9	10594	PRPF8	PRP8	Pre-mRNA-processing-splicing factor 8 (220 kDa U5 snRNP-specific protein) (PRP8 homolog) (Splicing factor Prp8) (p220)	34	5	109	0.167488	0.0980392	0.0694485	0.772624	0	142
7541	Q15043	23516	SLC39A14	S39AE	Zinc transporter ZIP14 (LIV-1 subfamily of ZIP zinc transporter 4) (LZT-Hs4) (Solute carrier family 39 member 14) (Zrt- and Irt-like protein 14) (ZIP-14)	37	4	109	0.182266	0.0784314	0.103835	1.21654	0	185
7854	Q8NC51	26135	SERBP1	PAIRB	Plasminogen activator inhibitor 1 RNA-binding protein (PAI1 RNA-binding protein 1) (PAI-RBP1) (SERPINE1 mRNA-binding protein 1)	38	7	109	0.187192	0.137255	0.0499372	0.447662	0	132
8272	Q9H0H5	29127	RACGAP1	RGAP1	Rac GTPase-activating protein 1 (Male germ cell RacGap) (MgcRacGAP) (Protein CYK4 homolog) (CYK4) (HsCYK-4)	29	11	109	0.142857	0.215686	-0.0728291	-0.594361	0	136
8438	Q9HC38	51031	GLOD4	GLOD4	Glyoxalase domain-containing protein 4	36	10	109	0.17734	0.196078	-0.0187385	-0.144914	0	129
11134	Q96IU4	84836	ABHD14B	ABHEB	Protein ABHD14B (EC 3.-.-.-) (Alpha/beta hydrolase domain-containing protein 14B) (Abhydrolase domain-containing protein 14B) (CCG1-interacting factor B)	40	10	109	0.197044	0.196078	0.000965904	0.00708942	5	223
12938	Q86YZ3	388697	HRNR	HORN	Hornerin	54	7	109	0.26601	0.137255	0.128755	0.954622	0	133
264	P02749	350	APOH	APOH	Beta-2-glycoprotein 1 (APC inhibitor) (Activated protein C-binding protein) (Anticardiolipin cofactor) (Apolipoprotein H) (Apo-H) (Beta-2-glycoprotein I) (B2GPI) (Beta(2)GPI)	47	13	108	0.231527	0.254902	-0.0233749	-0.138761	0	342
797	P53634	1075	CTSC	CATC	Dipeptidyl peptidase 1 (EC 3.4.14.1) (Cathepsin C) (Cathepsin J) (Dipeptidyl peptidase I) (DPP-I) (DPPI) (Dipeptidyl transferase) [Cleaved into: Dipeptidyl peptidase 1 exclusion domain chain (Dipeptidyl peptidase I exclusion domain chain); Dipeptidyl peptidase 1 heavy chain (Dipeptidyl peptidase I heavy chain); Dipeptidyl peptidase 1 light chain (Dipeptidyl peptidase I light chain)]	35	7	108	0.172414	0.137255	0.0351589	0.329018	1	255
1027	P01034	1471	CST3	CYTC	Cystatin-C (Cystatin-3) (Gamma-trace) (Neuroendocrine basic polypeptide) (Post-gamma-globulin)	37	9	108	0.182266	0.176471	0.00579542	0.0466178	0	146
1105	P08174	1604	CD55	DAF	Complement decay-accelerating factor (CD antigen CD55)	30	10	108	0.147783	0.196078	-0.0482952	-0.407948	0	342
2367	P16144	3691	ITGB4	ITB4	Integrin beta-4 (GP150) (CD antigen CD104)	35	5	108	0.172414	0.0980392	0.0743746	0.814444	0	430
2756	P08582	4241	MELTF	TRFM	Melanotransferrin (Melanoma-associated antigen p97) (CD antigen CD228)	49	2	108	0.241379	0.0392157	0.202164	2.6218	0	389
4734	Q15631	7247	TSN	TSN	Translin (EC 3.1.-.-) (Component 3 of promoter of RISC) (C3PO)	28	5	108	0.137931	0.0980392	0.0398918	0.492516	0	149
5912	P53992	9632	SEC24C	SC24C	Protein transport protein Sec24C (SEC24-related protein C)	27	6	108	0.133005	0.117647	0.0153579	0.177014	0	152
6144	P46926	10007	GNPDA1	GNPI1	Glucosamine-6-phosphate isomerase 1 (EC 3.5.99.6) (Glucosamine-6-phosphate deaminase 1) (GNPDA 1) (GlcN6P deaminase 1) (Oscillin)	43	6	108	0.211823	0.117647	0.0941756	0.848392	2	239
6430	Q01628	10410	IFITM3	IFM3	Interferon-induced transmembrane protein 3 (Dispanin subfamily A member 2b) (DSPA2b) (Interferon-inducible protein 1-8U)	25	0	108	0.123153	0	0.123153	#DIV/0!	0	214
9199	Q9H8S9	55233	MOB1A	MOB1A	MOB kinase activator 1A (Mob1 alpha) (Mob1A) (Mob1 homolog 1B) (Mps one binder kinase activator-like 1B)	29	8	108	0.142857	0.156863	-0.0140056	-0.13493	0	164
9606	Q7Z2W4	56829	ZC3HAV1	ZCCHV	Zinc finger CCCH-type antiviral protein 1 (ADP-ribosyltransferase diphtheria toxin-like 13) (ARTD13) (Zinc finger CCCH domain-containing protein 2) (Zinc finger antiviral protein) (ZAP)	38	5	108	0.187192	0.0980392	0.0891529	0.933089	0	129
2166	P51659	3295	HSD17B4	DHB4	Peroxisomal multifunctional enzyme type 2 (MFE-2) (17-beta-hydroxysteroid dehydrogenase 4) (17-beta-HSD 4) (D-bifunctional protein) (DBP) (Multifunctional protein 2) (MPF-2) (Short chain dehydrogenase/reductase family 8C member 1) [Cleaved into: (3R)-hydroxyacyl-CoA dehydrogenase (EC 1.1.1.n12); Enoyl-CoA hydratase 2 (EC 4.2.1.107) (EC 4.2.1.119) (3-alpha,7-alpha,12-alpha-trihydroxy-5-beta-choles…	30	14	107	0.147783	0.27451	-0.126727	-0.893375	2	147
2175	P34931	3305	HSPA1L	HS71L	Heat shock 70 kDa protein 1-like (Heat shock 70 kDa protein 1L) (Heat shock 70 kDa protein 1-Hom) (HSP70-Hom)	44	6	107	0.216749	0.117647	0.0991017	0.881559	40	568
2586	P49257	3998	LMAN1	LMAN1	Protein ERGIC-53 (ER-Golgi intermediate compartment 53 kDa protein) (Gp58) (Intracellular mannose-specific lectin MR60) (Lectin mannose-binding 1)	44	10	107	0.216749	0.196078	0.0206703	0.144593	0	131
2703	P43121	4162	MCAM	MUC18	Cell surface glycoprotein MUC18 (Cell surface glycoprotein P1H12) (Melanoma cell adhesion molecule) (Melanoma-associated antigen A32) (Melanoma-associated antigen MUC18) (S-endo 1 endothelial-associated antigen) (CD antigen CD146)	41	12	107	0.20197	0.235294	-0.0333237	-0.220321	0	129
2915	Q12965	4643	MYO1E	MYO1E	Unconventional myosin-Ie (Myosin-Ic) (Unconventional myosin 1E)	25	6	107	0.123153	0.117647	0.00550565	0.0659831	0	508
3044	P30419	4836	NMT1	NMT1	Glycylpeptide N-tetradecanoyltransferase 1 (EC 2.3.1.97) (Myristoyl-CoA:protein N-myristoyltransferase 1) (NMT 1) (Type I N-myristoyltransferase) (Peptide N-myristoyltransferase 1)	33	3	107	0.162562	0.0588235	0.103738	1.46652	0	134
3808	P46060	5905	RANGAP1	RAGP1	Ran GTPase-activating protein 1 (RanGAP1)	30	5	107	0.147783	0.0980392	0.049744	0.592052	0	120
4082	Q99584	6284	S100A13	S10AD	Protein S100-A13 (S100 calcium-binding protein A13)	30	3	107	0.147783	0.0588235	0.0889597	1.32902	0	109
4128	P18827	6382	SDC1	SDC1	Syndecan-1 (SYND1) (CD antigen CD138)	41	6	107	0.20197	0.117647	0.0843234	0.779679	0	131
6175	Q9NSD9	10056	FARSB	SYFB	Phenylalanine--tRNA ligase beta subunit (EC 6.1.1.20) (Phenylalanyl-tRNA synthetase beta subunit) (PheRS)	34	9	107	0.167488	0.176471	-0.0089829	-0.0753727	2	141
6183	O15127	10066	SCAMP2	SCAM2	Secretory carrier-associated membrane protein 2 (Secretory carrier membrane protein 2)	34	5	107	0.167488	0.0980392	0.0694485	0.772624	0	219
11611	Q9BZQ8	116496	NIBAN1	NIBAN	Protein Niban (Cell growth-inhibiting gene 39 protein) (Protein FAM129A)	41	6	107	0.20197	0.117647	0.0843234	0.779679	0	254
504	Q07021	708	C1QBP	C1QBP	Complement component 1 Q subcomponent-binding protein, mitochondrial (ASF/SF2-associated protein p32) (Glycoprotein gC1qBP) (C1qBP) (Hyaluronan-binding protein 1) (Mitochondrial matrix protein p32) (gC1q-R protein) (p33)	21	13	106	0.103448	0.254902	-0.151454	-1.30103	0	128
1346	Q15717	1994	ELAVL1	ELAV1	ELAV-like protein 1 (Hu-antigen R) (HuR)	29	5	106	0.142857	0.0980392	0.0448179	0.543142	0	136
1700	P16278	2720	GLB1	BGAL	Beta-galactosidase (EC 3.2.1.23) (Acid beta-galactosidase) (Lactase) (Elastin receptor 1)	41	7	106	0.20197	0.137255	0.0647155	0.557287	0	124
1952	P05546	3053	SERPIND1	HEP2	Heparin cofactor 2 (Heparin cofactor II) (HC-II) (Protease inhibitor leuserpin-2) (HLS2) (Serpin D1)	53	8	106	0.261084	0.156863	0.104221	0.73501	1	505
2307	Q12906	3609	ILF3	ILF3	Interleukin enhancer-binding factor 3 (Double-stranded RNA-binding protein 76) (DRBP76) (M-phase phosphoprotein 4) (MPP4) (Nuclear factor associated with dsRNA) (NFAR) (Nuclear factor of activated T-cells 90 kDa) (NF-AT-90) (Translational control protein 80) (TCP80)	30	10	106	0.147783	0.196078	-0.0482952	-0.407948	0	133
2375	P19827	3697	ITIH1	ITIH1	Inter-alpha-trypsin inhibitor heavy chain H1 (ITI heavy chain H1) (ITI-HC1) (Inter-alpha-inhibitor heavy chain 1) (Inter-alpha-trypsin inhibitor complex component III) (Serum-derived hyaluronan-associated protein) (SHAP)	64	9	106	0.315271	0.176471	0.1388	0.837164	4	296
3692	Q12792	5756	TWF1	TWF1	Twinfilin-1 (Protein A6) (Protein tyrosine kinase 9)	29	9	106	0.142857	0.176471	-0.0336134	-0.304855	0	178
3834	Q09028	5928	RBBP4	RBBP4	Histone-binding protein RBBP4 (Chromatin assembly factor 1 subunit C) (CAF-1 subunit C) (Chromatin assembly factor I p48 subunit) (CAF-I 48 kDa subunit) (CAF-I p48) (Nucleosome-remodeling factor subunit RBAP48) (Retinoblastoma-binding protein 4) (RBBP-4) (Retinoblastoma-binding protein p48)	25	4	106	0.123153	0.0784314	0.0447213	0.650946	0	159
4198	P34896	6470	SHMT1	GLYC	Serine hydroxymethyltransferase, cytosolic (SHMT) (EC 2.1.2.1) (Glycine hydroxymethyltransferase) (Serine methylase)	41	6	106	0.20197	0.117647	0.0843234	0.779679	30	228
4839	P22695	7385	UQCRC2	QCR2	Cytochrome b-c1 complex subunit 2, mitochondrial (Complex III subunit 2) (Core protein II) (Ubiquinol-cytochrome-c reductase complex core protein 2)	23	15	106	0.1133	0.294118	-0.180817	-1.37624	35	167
6251	Q13263	10155	TRIM28	TIF1B	Transcription intermediary factor 1-beta (TIF1-beta) (E3 SUMO-protein ligase TRIM28) (EC 2.3.2.27) (KRAB-associated protein 1) (KAP-1) (KRAB-interacting protein 1) (KRIP-1) (Nuclear corepressor KAP-1) (RING finger protein 96) (RING-type E3 ubiquitin transferase TIF1-beta) (Tripartite motif-containing protein 28)	29	7	106	0.142857	0.137255	0.00560224	0.0577155	0	136
7418	O75165	23317	DNAJC13	DJC13	DnaJ homolog subfamily C member 13 (Required for receptor-mediated endocytosis 8) (RME-8)	39	8	106	0.192118	0.156863	0.0352555	0.292492	0	129
7578	O94760	23576	DDAH1	DDAH1	N(G),N(G)-dimethylarginine dimethylaminohydrolase 1 (DDAH-1) (Dimethylarginine dimethylaminohydrolase 1) (EC 3.5.3.18) (DDAHI) (Dimethylargininase-1)	43	7	106	0.211823	0.137255	0.0745678	0.625999	0	130
9316	Q9UJ70	55577	NAGK	NAGK	N-acetyl-D-glucosamine kinase (N-acetylglucosamine kinase) (EC 2.7.1.59) (GlcNAc kinase)	35	8	106	0.172414	0.156863	0.015551	0.136372	0	122
9653	Q9NQR4	56954	NIT2	NIT2	Omega-amidase NIT2 (EC 3.5.1.3) (Nitrilase homolog 2)	38	9	106	0.187192	0.176471	0.0107215	0.0850919	7	178
337	Q13510	427	ASAH1	ASAH1	Acid ceramidase (AC) (ACDase) (Acid CDase) (EC 3.5.1.23) (Acylsphingosine deacylase) (N-acylsphingosine amidohydrolase) (Putative 32 kDa heart protein) (PHP32) [Cleaved into: Acid ceramidase subunit alpha; Acid ceramidase subunit beta]	46	5	105	0.226601	0.0980392	0.128562	1.20872	0	136
1118	Q16643	1627	DBN1	DREB	Drebrin (Developmentally-regulated brain protein)	31	10	105	0.152709	0.196078	-0.0433691	-0.360642	0	109
1332	P06730	1977	EIF4E	IF4E	Eukaryotic translation initiation factor 4E (eIF-4E) (eIF4E) (eIF-4F 25 kDa subunit) (mRNA cap-binding protein)	27	5	105	0.133005	0.0980392	0.0349657	0.440049	0	134
3861	Q92900	5976	UPF1	RENT1	Regulator of nonsense transcripts 1 (EC 3.6.4.-) (ATP-dependent helicase RENT1) (Nonsense mRNA reducing factor 1) (NORF1) (Up-frameshift suppressor 1 homolog) (hUpf1)	34	8	105	0.167488	0.156863	0.0106249	0.0945523	0	166
4435	Q08945	6749	SSRP1	SSRP1	FACT complex subunit SSRP1 (Chromatin-specific transcription elongation factor 80 kDa subunit) (Facilitates chromatin transcription complex 80 kDa subunit) (FACT 80 kDa subunit) (FACTp80) (Facilitates chromatin transcription complex subunit SSRP1) (Recombination signal sequence recognition protein 1) (Structure-specific recognition protein 1) (hSSRP1) (T160)	31	7	105	0.152709	0.137255	0.0154545	0.153931	0	124
4689	Q13641	7162	TPBG	TPBG	Trophoblast glycoprotein (5T4 oncofetal antigen) (5T4 oncofetal trophoblast glycoprotein) (5T4 oncotrophoblast glycoprotein) (M6P1) (Wnt-activated inhibitory factor 1) (WAIF1)	40	3	105	0.197044	0.0588235	0.138221	1.74406	6	457
4813	P09936	7345	UCHL1	UCHL1	Ubiquitin carboxyl-terminal hydrolase isozyme L1 (UCH-L1) (EC 3.4.19.12) (EC 6.-.-.-) (Neuron cytoplasmic protein 9.5) (PGP 9.5) (PGP9.5) (Ubiquitin thioesterase L1)	45	8	105	0.221675	0.156863	0.0648121	0.498943	0	186
5720	O43396	9352	TXNL1	TXNL1	Thioredoxin-like protein 1 (32 kDa thioredoxin-related protein)	31	7	105	0.152709	0.137255	0.0154545	0.153931	0	142
5864	O95716	9545	RAB3D	RAB3D	Ras-related protein Rab-3D	40	7	105	0.197044	0.137255	0.0597894	0.521663	0	170
6188	Q9NY33	10072	DPP3	DPP3	Dipeptidyl peptidase 3 (EC 3.4.14.4) (Dipeptidyl aminopeptidase III) (Dipeptidyl arylamidase III) (Dipeptidyl peptidase III) (DPP III) (Enkephalinase B)	35	9	105	0.172414	0.176471	-0.0040568	-0.0335526	0	150
7015	O43592	11260	XPOT	XPOT	Exportin-T (Exportin(tRNA)) (tRNA exportin)	33	9	105	0.162562	0.176471	-0.013909	-0.118441	0	120
7061	Q6IBS0	11344	TWF2	TWF2	Twinfilin-2 (A6-related protein) (hA6RP) (Protein tyrosine kinase 9-like) (Twinfilin-1-like protein)	34	8	105	0.167488	0.156863	0.0106249	0.0945523	0	178
10336	Q9BVC6	79073	TMEM109	TM109	Transmembrane protein 109 (Mitsugumin-23) (Mg23)	34	3	105	0.167488	0.0588235	0.108664	1.50959	0	121
252	Q06481	334	APLP2	APLP2	Amyloid-like protein 2 (APLP-2) (APPH) (Amyloid protein homolog) (CDEI box-binding protein) (CDEBP)	33	8	104	0.162562	0.156863	0.00569883	0.0514835	0	181
925	P21964	1312	COMT	COMT	Catechol O-methyltransferase (EC 2.1.1.6)	26	11	104	0.128079	0.215686	-0.0876075	-0.751902	2	130
1074	P78310	1525	CXADR	CXAR	Coxsackievirus and adenovirus receptor (CAR) (hCAR) (CVB3-binding protein) (Coxsackievirus B-adenovirus receptor) (HCVADR)	48	3	104	0.236453	0.0588235	0.17763	2.00709	0	119
1359	Q14247	2017	CTTN	SRC8	Src substrate cortactin (Amplaxin) (Oncogene EMS1)	37	6	104	0.182266	0.117647	0.064619	0.63158	0	138
2577	P48059	3987	LIMS1	LIMS1	LIM and senescent cell antigen-like-containing domain protein 1 (Particularly interesting new Cys-His protein 1) (PINCH-1) (Renal carcinoma antigen NY-REN-48)	33	7	104	0.162562	0.137255	0.0253067	0.244129	0	124
4145	P55735	6396	SEC13	SEC13	Protein SEC13 homolog (SEC13-like protein 1) (SEC13-related protein)	30	7	104	0.147783	0.137255	0.0105283	0.106625	0	131
4367	Q16222	6675	UAP1	UAP1	UDP-N-acetylhexosamine pyrophosphorylase (Antigen X) (AGX) (Sperm-associated antigen 2) [Includes: UDP-N-acetylgalactosamine pyrophosphorylase (EC 2.7.7.83) (AGX-1); UDP-N-acetylglucosamine pyrophosphorylase (EC 2.7.7.23) (AGX-2)]	41	7	104	0.20197	0.137255	0.0647155	0.557287	0	265
4419	Q9UHB9	6730	SRP68	SRP68	Signal recognition particle subunit SRP68 (SRP68) (Signal recognition particle 68 kDa protein)	28	4	104	0.137931	0.0784314	0.0594997	0.814444	0	128
4492	O15260	6836	SURF4	SURF4	Surfeit locus protein 4	30	6	104	0.147783	0.117647	0.0301362	0.329018	1	125
4625	P01033	7076	TIMP1	TIMP1	Metalloproteinase inhibitor 1 (Erythroid-potentiating activity) (EPA) (Fibroblast collagenase inhibitor) (Collagenase inhibitor) (Tissue inhibitor of metalloproteinases 1) (TIMP-1)	31	10	104	0.152709	0.196078	-0.0433691	-0.360642	0	185
5044	Q12974	8073	PTP4A2	TP4A2	Protein tyrosine phosphatase type IVA 2 (EC 3.1.3.48) (HU-PP-1) (OV-1) (PTP(CAAXII)) (Protein-tyrosine phosphatase 4a2) (Protein-tyrosine phosphatase of regenerating liver 2) (PRL-2)	29	3	104	0.142857	0.0588235	0.0840336	1.28011	0	143
5790	O95819	9448	MAP4K4	M4K4	Mitogen-activated protein kinase kinase kinase kinase 4 (EC 2.7.11.1) (HPK/GCK-like kinase HGK) (MAPK/ERK kinase kinase kinase 4) (MEK kinase kinase 4) (MEKKK 4) (Nck-interacting kinase)	45	4	104	0.221675	0.0784314	0.143244	1.49894	0	141
5997	Q14165	9761	MLEC	MLEC	Malectin	32	15	104	0.157635	0.294118	-0.136482	-0.899801	0	122
6443	O15173	10424	PGRMC2	PGRC2	Membrane-associated progesterone receptor component 2 (Progesterone membrane-binding protein) (Steroid receptor protein DG6)	31	7	104	0.152709	0.137255	0.0154545	0.153931	0	148
7473	Q5VYK3	23392	ECPAS	ECM29	Proteasome-associated protein ECM29 homolog (Ecm29)	37	5	104	0.182266	0.0980392	0.0842268	0.894615	0	145
9823	Q9NRX5	57515	SERINC1	SERC1	Serine incorporator 1 (Tumor differentially expressed protein 1-like) (Tumor differentially expressed protein 2)	37	6	104	0.182266	0.117647	0.064619	0.63158	0	158
12849	Q7Z794	374454	KRT77	K2C1B	Keratin, type II cytoskeletal 1b (Cytokeratin-1B) (CK-1B) (Keratin-77) (K77) (Type-II keratin Kb39)	42	8	104	0.206897	0.156863	0.0500338	0.399407	0	142
6	P01011	12	SERPINA3	AACT	Alpha-1-antichymotrypsin (ACT) (Cell growth-inhibiting gene 24/25 protein) (Serpin A3) [Cleaved into: Alpha-1-antichymotrypsin His-Pro-less]	53	10	103	0.261084	0.196078	0.0650053	0.413082	1	505
248	P27695	328	APEX1	APEX1	DNA-(apurinic or apyrimidinic site) lyase (EC 3.1.-.-) (EC 4.2.99.18) (APEX nuclease) (APEN) (Apurinic-apyrimidinic endonuclease 1) (AP endonuclease 1) (APE-1) (REF-1) (Redox factor-1) [Cleaved into: DNA-(apurinic or apyrimidinic site) lyase, mitochondrial]	23	6	103	0.1133	0.117647	-0.00434657	-0.0543111	9	122
302	P62745	388	RHOB	RHOB	Rho-related GTP-binding protein RhoB (Rho cDNA clone 6) (h6)	34	5	103	0.167488	0.0980392	0.0694485	0.772624	0	533
1897	P13807	2997	GYS1	GYS1	Glycogen [starch] synthase, muscle (EC 2.4.1.11)	28	10	103	0.137931	0.196078	-0.0581474	-0.507484	8	146
2172	P08107	3303	#N/A	HS71A	Heat shock 70 kDa protein 1A (Heat shock 70 kDa protein 1) (HSP70-1) (HSP70.1)	48	10	103	0.236453	0.196078	0.0403748	0.270124	40	568
2263	P01859	3501	IGHG2	IGHG2	Immunoglobulin heavy constant gamma 2 (Ig gamma-2 chain C region) (Ig gamma-2 chain C region DOT) (Ig gamma-2 chain C region TIL) (Ig gamma-2 chain C region ZIE)	46	11	103	0.226601	0.215686	0.0109147	0.0712198	0	103
3272	P08237	5213	PFKM	PFKAM	ATP-dependent 6-phosphofructokinase, muscle type (ATP-PFK) (PFK-M) (EC 2.7.1.11) (6-phosphofructokinase type A) (Phosphofructo-1-kinase isozyme A) (PFK-A) (Phosphohexokinase)	42	10	103	0.206897	0.196078	0.0108181	0.0774788	15	296
3796	P54727	5887	RAD23B	RD23B	UV excision repair protein RAD23 homolog B (HR23B) (hHR23B) (XP-C repair-complementing complex 58 kDa protein) (p58)	40	7	103	0.197044	0.137255	0.0597894	0.521663	0	468
4313	P52788	6611	SMS	SPSY	Spermine synthase (SPMSY) (EC 2.5.1.22) (Spermidine aminopropyltransferase)	33	6	103	0.162562	0.117647	0.0449145	0.466521	0	185
4748	Q13630	7264	GFUS	FCL	GDP-L-fucose synthase (EC 1.1.1.271) (GDP-4-keto-6-deoxy-D-mannose-3,5-epimerase-4-reductase) (Protein FX) (Red cell NADP(H)-binding protein) (Short-chain dehydrogenase/reductase family 4E member 1)	35	6	103	0.172414	0.117647	0.0547667	0.55141	15	178
4808	Q15819	7336	UBE2V2	UB2V2	Ubiquitin-conjugating enzyme E2 variant 2 (DDVit 1) (Enterocyte differentiation-associated factor 1) (EDAF-1) (Enterocyte differentiation-promoting factor 1) (EDPF-1) (MMS2 homolog) (Vitamin D3-inducible protein)	22	7	103	0.108374	0.137255	-0.0288805	-0.340834	0	173
5108	Q93077	8334	H2AC6	H2A1C	Histone H2A type 1-C (Histone H2A/l)	22	6	103	0.108374	0.117647	-0.00927267	-0.118441	0	452
6546	O75915	10550	ARL6IP5	PRAF3	PRA1 family protein 3 (ADP-ribosylation factor-like protein 6-interacting protein 5) (ARL-6-interacting protein 5) (Aip-5) (Cytoskeleton-related vitamin A-responsive protein) (Dermal papilla-derived protein 11) (GTRAP3-18) (Glutamate transporter EAAC1-interacting protein) (JM5) (Prenylated Rab acceptor protein 2) (Protein JWa) (Putative MAPK-activating protein PM27)	29	6	103	0.142857	0.117647	0.0252101	0.280108	0	133
7299	Q14166	23170	TTLL12	TTL12	Tubulin--tyrosine ligase-like protein 12	33	6	103	0.162562	0.117647	0.0449145	0.466521	0	131
7774	Q9UQN3	25978	CHMP2B	CHM2B	Charged multivesicular body protein 2b (CHMP2.5) (Chromatin-modifying protein 2b) (CHMP2b) (Vacuolar protein sorting-associated protein 2-2) (Vps2-2) (hVps2-2)	53	4	103	0.261084	0.0784314	0.182652	1.73501	0	127
8247	Q9NRX4	29085	PHPT1	PHP14	14 kDa phosphohistidine phosphatase (EC 3.9.1.3) (Phosphohistidine phosphatase 1) (PHPT1) (Protein histidine phosphatase) (PHP) (Protein janus-A homolog)	29	6	103	0.142857	0.117647	0.0252101	0.280108	0	117
9516	O95445	55937	APOM	APOM	Apolipoprotein M (Apo-M) (ApoM) (Protein G3a)	23	11	103	0.1133	0.215686	-0.102386	-0.92878	0	110
40	Q99798	50	ACO2	ACON	Aconitate hydratase, mitochondrial (Aconitase) (EC 4.2.1.3) (Citrate hydro-lyase)	27	13	102	0.133005	0.254902	-0.121897	-0.938463	26	264
579	P62158	801	#N/A	CALM1	Calmodulin-1	51	15	102	0.251232	0.294118	-0.0428861	-0.227376	0	452
1457	P00488	2162	F13A1	F13A	Coagulation factor XIII A chain (Coagulation factor XIIIa) (EC 2.3.2.13) (Protein-glutamine gamma-glutamyltransferase A chain) (Transglutaminase A chain)	51	10	102	0.251232	0.196078	0.0551531	0.357587	0	308
1927	P55084	3032	HADHB	ECHB	Trifunctional enzyme subunit beta, mitochondrial (TP-beta) [Includes: 3-ketoacyl-CoA thiolase (EC 2.3.1.16) (Acetyl-CoA acyltransferase) (Beta-ketothiolase)]	25	9	102	0.123153	0.176471	-0.0533179	-0.518979	29	271
2797	P50281	4323	MMP14	MMP14	Matrix metalloproteinase-14 (MMP-14) (EC 3.4.24.80) (MMP-X1) (Membrane-type matrix metalloproteinase 1) (MT-MMP 1) (MTMMP1) (Membrane-type-1 matrix metalloproteinase) (MT1-MMP) (MT1MMP)	29	6	102	0.142857	0.117647	0.0252101	0.280108	0	424
2992	Q9Y295	4733	DRG1	DRG1	Developmentally-regulated GTP-binding protein 1 (DRG-1) (Neural precursor cell expressed developmentally down-regulated protein 3) (NEDD-3)	32	8	102	0.157635	0.156863	0.000772723	0.00708942	0	132
3342	P48426	5305	PIP4K2A	PI42A	Phosphatidylinositol 5-phosphate 4-kinase type-2 alpha (EC 2.7.1.149) (1-phosphatidylinositol 5-phosphate 4-kinase 2-alpha) (Diphosphoinositide kinase 2-alpha) (PIP5KIII) (Phosphatidylinositol 5-phosphate 4-kinase type II alpha) (PI(5)P 4-kinase type II alpha) (PIP4KII-alpha) (PtdIns(4)P-5-kinase B isoform) (PtdIns(4)P-5-kinase C isoform) (PtdIns(5)P-4-kinase isoform 2-alpha)	43	5	102	0.211823	0.0980392	0.113783	1.11143	0	176
3782	O00194	5874	RAB27B	RB27B	Ras-related protein Rab-27B (C25KG)	51	8	102	0.251232	0.156863	0.0943688	0.679515	0	152
6108	O95747	9943	OXSR1	OXSR1	Serine/threonine-protein kinase OSR1 (EC 2.7.11.1) (Oxidative stress-responsive 1 protein)	37	9	102	0.182266	0.176471	0.00579542	0.0466178	0	141
6746	O00264	10857	PGRMC1	PGRC1	Membrane-associated progesterone receptor component 1 (mPR)	32	7	102	0.157635	0.137255	0.0203806	0.199735	0	148
7580	P31944	23581	CASP14	CASPE	Caspase-14 (CASP-14) (EC 3.4.22.-) [Cleaved into: Caspase-14 subunit p17, mature form; Caspase-14 subunit p10, mature form; Caspase-14 subunit p20, intermediate form; Caspase-14 subunit p8, intermediate form]	32	4	102	0.157635	0.0784314	0.0792041	1.00709	0	187
8738	Q9Y3E7	51652	CHMP3	CHMP3	Charged multivesicular body protein 3 (Chromatin-modifying protein 3) (Neuroendocrine differentiation factor) (Vacuolar protein sorting-associated protein 24) (hVps24)	41	5	102	0.20197	0.0980392	0.103931	1.04271	0	241
2126	P31942	3189	HNRNPH3	HNRH3	Heterogeneous nuclear ribonucleoprotein H3 (hnRNP H3) (Heterogeneous nuclear ribonucleoprotein 2H9) (hnRNP 2H9)	24	5	101	0.118227	0.0980392	0.0201874	0.270124	0	246
2454	O00629	3840	KPNA4	IMA3	Importin subunit alpha-3 (Importin alpha Q1) (Qip1) (Karyopherin subunit alpha-4)	22	8	101	0.108374	0.156863	-0.0484884	-0.533479	0	197
2646	P09758	4070	TACSTD2	TACD2	Tumor-associated calcium signal transducer 2 (Cell surface glycoprotein Trop-2) (Membrane component chromosome 1 surface marker 1) (Pancreatic carcinoma marker protein GA733-1)	36	8	101	0.17734	0.156863	0.0204772	0.177014	0	186
2919	Q9UM54	4646	MYO6	MYO6	Unconventional myosin-VI (Unconventional myosin-6)	39	6	101	0.192118	0.117647	0.0744712	0.707529	0	508
3574	P07225	5627	PROS1	PROS	Vitamin K-dependent protein S	41	8	101	0.20197	0.156863	0.0451077	0.364641	0	115
3589	P35030	5646	PRSS3	TRY3	Trypsin-3 (EC 3.4.21.4) (Brain trypsinogen) (Mesotrypsinogen) (Serine protease 3) (Serine protease 4) (Trypsin III) (Trypsin IV)	23	2	101	0.1133	0.0392157	0.0740848	1.53065	7	514
3718	P10586	5792	PTPRF	PTPRF	Receptor-type tyrosine-protein phosphatase F (EC 3.1.3.48) (Leukocyte common antigen related) (LAR)	40	8	101	0.197044	0.156863	0.0401816	0.329018	0	344
3733	Q00577	5813	PURA	PURA	Transcriptional activator protein Pur-alpha (Purine-rich single-stranded DNA-binding protein alpha)	28	6	101	0.137931	0.117647	0.020284	0.229482	0	144
5846	O15126	9522	SCAMP1	SCAM1	Secretory carrier-associated membrane protein 1 (Secretory carrier membrane protein 1)	28	4	101	0.137931	0.0784314	0.0594997	0.814444	0	101
7048	Q13185	11335	CBX3	CBX3	Chromobox protein homolog 3 (HECH) (Heterochromatin protein 1 homolog gamma) (HP1 gamma) (Modifier 2 protein)	21	4	101	0.103448	0.0784314	0.0250169	0.399407	0	116
7163	Q14914	22949	PTGR1	PTGR1	Prostaglandin reductase 1 (PRG-1) (EC 1.3.1.-) (15-oxoprostaglandin 13-reductase) (EC 1.3.1.48) (NADP-dependent leukotriene B4 12-hydroxydehydrogenase) (EC 1.3.1.74)	47	7	101	0.231527	0.137255	0.0942722	0.754323	2	125
7626	Q9UHN6	23670	CEMIP2	TMEM2	Transmembrane protein 2	44	7	101	0.216749	0.137255	0.0794939	0.659166	0	166
7920	Q92882	26578	OSTF1	OSTF1	Osteoclast-stimulating factor 1	28	5	101	0.137931	0.0980392	0.0398918	0.492516	0	129
434	Q07812	581	BAX	BAX	Apoptosis regulator BAX (Bcl-2-like protein 4) (Bcl2-L-4)	33	4	100	0.162562	0.0784314	0.0841302	1.05148	0	117
546	P00918	760	CA2	CAH2	Carbonic anhydrase 2 (EC 4.2.1.1) (Carbonate dehydratase II) (Carbonic anhydrase C) (CAC) (Carbonic anhydrase II) (CA-II)	37	9	100	0.182266	0.176471	0.00579542	0.0466178	8	234
1805	P07203	2876	GPX1	GPX1	Glutathione peroxidase 1 (GPx-1) (GSHPx-1) (EC 1.11.1.9) (Cellular glutathione peroxidase)	21	11	100	0.103448	0.215686	-0.112238	-1.06002	2	224
1987	P19367	3098	HK1	HXK1	Hexokinase-1 (EC 2.7.1.1) (Brain form hexokinase) (Hexokinase type I) (HK I)	32	12	100	0.157635	0.235294	-0.0776586	-0.577873	0	165
2634	P50895	4059	BCAM	BCAM	Basal cell adhesion molecule (Auberger B antigen) (B-CAM cell surface glycoprotein) (F8/G253 antigen) (Lutheran antigen) (Lutheran blood group glycoprotein) (CD antigen CD239)	45	4	100	0.221675	0.0784314	0.143244	1.49894	0	114
3165	P05121	5054	SERPINE1	PAI1	Plasminogen activator inhibitor 1 (PAI) (PAI-1) (Endothelial plasminogen activator inhibitor) (Serpin E1)	32	6	100	0.157635	0.117647	0.0399884	0.422127	1	505
3169	Q13177	5062	PAK2	PAK2	Serine/threonine-protein kinase PAK 2 (EC 2.7.11.1) (Gamma-PAK) (PAK65) (S6/H4 kinase) (p21-activated kinase 2) (PAK-2) (p58) [Cleaved into: PAK-2p27 (p27); PAK-2p34 (p34) (C-t-PAK2)]	33	7	100	0.162562	0.137255	0.0253067	0.244129	0	150
3340	P12273	5304	PIP	PIP	Prolactin-inducible protein (Gross cystic disease fluid protein 15) (GCDFP-15) (Prolactin-induced protein) (Secretory actin-binding protein) (SABP) (gp17)	39	8	100	0.192118	0.156863	0.0352555	0.292492	0	100
4654	O14817	7106	TSPAN4	TSN4	Tetraspanin-4 (Tspan-4) (Novel antigen 2) (NAG-2) (Transmembrane 4 superfamily member 7)	31	1	100	0.152709	0.0196078	0.133102	2.96129	0	453
5637	Q9NR30	9188	DDX21	DDX21	Nucleolar RNA helicase 2 (EC 3.6.4.13) (DEAD box protein 21) (Gu-alpha) (Nucleolar RNA helicase Gu) (Nucleolar RNA helicase II) (RH II/Gu)	37	5	100	0.182266	0.0980392	0.0842268	0.894615	15	412
6339	Q9UNE7	10273	STUB1	CHIP	E3 ubiquitin-protein ligase CHIP (EC 2.3.2.27) (Antigen NY-CO-7) (CLL-associated antigen KW-8) (Carboxy terminus of Hsp70-interacting protein) (RING-type E3 ubiquitin transferase CHIP) (STIP1 homology and U box-containing protein 1)	43	2	100	0.211823	0.0392157	0.172607	2.43335	0	124
7211	Q9UIA9	23039	XPO7	XPO7	Exportin-7 (Exp7) (Ran-binding protein 16)	32	3	100	0.157635	0.0588235	0.0988119	1.42213	0	125
7563	Q9ULA0	23549	DNPEP	DNPEP	Aspartyl aminopeptidase (EC 3.4.11.21)	34	8	100	0.167488	0.156863	0.0106249	0.0945523	10	146
12973	Q58FF8	391634	#N/A	H90B2	Putative heat shock protein HSP 90-beta 2 (Heat shock protein 90-beta b) (Heat shock protein 90Bb)	25	3	100	0.123153	0.0588235	0.0643292	1.06598	31	526
2442	P01042	3827	KNG1	KNG1	Kininogen-1 (Alpha-2-thiol proteinase inhibitor) (Fitzgerald factor) (High molecular weight kininogen) (HMWK) (Williams-Fitzgerald-Flaujeac factor) [Cleaved into: Kininogen-1 heavy chain; T-kinin (Ile-Ser-Bradykinin); Bradykinin (Kallidin I); Lysyl-bradykinin (Kallidin II); Kininogen-1 light chain; Low molecular weight growth-promoting factor]	53	7	99	0.261084	0.137255	0.123829	0.927655	0	129
2635	P51884	4060	LUM	LUM	Lumican (Keratan sulfate proteoglycan lumican) (KSPG lumican)	53	9	99	0.261084	0.176471	0.0846132	0.565085	6	457
3396	P55058	5360	PLTP	PLTP	Phospholipid transfer protein (Lipid transfer protein II)	30	12	99	0.147783	0.235294	-0.0875109	-0.670982	0	190
3562	Q02750	5604	MAP2K1	MP2K1	Dual specificity mitogen-activated protein kinase kinase 1 (MAP kinase kinase 1) (MAPKK 1) (MKK1) (EC 2.7.12.2) (ERK activator kinase 1) (MAPK/ERK kinase 1) (MEK 1)	32	4	99	0.157635	0.0784314	0.0792041	1.00709	0	146
4847	P46939	7402	UTRN	UTRO	Utrophin (Dystrophin-related protein 1) (DRP-1)	33	6	99	0.162562	0.117647	0.0449145	0.466521	0	536
4959	Q14258	7706	TRIM25	TRI25	E3 ubiquitin/ISG15 ligase TRIM25 (EC 6.3.2.n3) (Estrogen-responsive finger protein) (RING finger protein 147) (RING-type E3 ubiquitin transferase) (EC 2.3.2.27) (RING-type E3 ubiquitin transferase TRIM25) (Tripartite motif-containing protein 25) (Ubiquitin/ISG15-conjugating enzyme TRIM25) (Zinc finger protein 147)	30	4	99	0.147783	0.0784314	0.0693519	0.91398	0	111
5248	O14936	8573	CASK	CSKP	Peripheral plasma membrane protein CASK (hCASK) (EC 2.7.11.1) (Calcium/calmodulin-dependent serine protein kinase) (Protein lin-2 homolog)	31	5	99	0.152709	0.0980392	0.0546701	0.639358	1	235
7029	O95372	11313	LYPLA2	LYPA2	Acyl-protein thioesterase 2 (APT-2) (EC 3.1.2.-) (Lysophospholipase II) (LPL-II) (LysoPLA II)	27	9	99	0.133005	0.176471	-0.0434657	-0.407948	0	173
7424	Q96PU5	23327	NEDD4L	NED4L	E3 ubiquitin-protein ligase NEDD4-like (EC 2.3.2.26) (HECT-type E3 ubiquitin transferase NED4L) (NEDD4.2) (Nedd4-2)	46	4	99	0.226601	0.0784314	0.14817	1.53065	0	274
8376	Q8N4C8	50488	MINK1	MINK1	Misshapen-like kinase 1 (EC 2.7.11.1) (GCK family kinase MiNK) (MAPK/ERK kinase kinase kinase 6) (MEK kinase kinase 6) (MEKKK 6) (Misshapen/NIK-related kinase) (Mitogen-activated protein kinase kinase kinase kinase 6)	35	1	99	0.172414	0.0196078	0.152806	3.13637	0	139
8787	Q9P289	51765	STK26	STK26	Serine/threonine-protein kinase 26 (EC 2.7.11.1) (MST3 and SOK1-related kinase) (Mammalian STE20-like protein kinase 4) (MST-4) (STE20-like kinase MST4) (Serine/threonine-protein kinase MASK)	31	4	99	0.152709	0.0784314	0.074278	0.961286	0	193
9508	Q96RT1	55914	ERBIN	ERBIN	Erbin (Densin-180-like protein) (Erbb2-interacting protein) (Protein LAP2)	34	6	99	0.167488	0.117647	0.0498406	0.50959	6	457
10455	Q8NBJ5	79709	COLGALT1	GT251	Procollagen galactosyltransferase 1 (EC 2.4.1.50) (Collagen beta(1-O)galactosyltransferase 1) (Glycosyltransferase 25 family member 1) (Hydroxylysine galactosyltransferase 1)	30	6	99	0.147783	0.117647	0.0301362	0.329018	0	119
12264	Q8N1N4	196374	KRT78	K2C78	Keratin, type II cytoskeletal 78 (Cytokeratin-78) (CK-78) (Keratin-5b) (Keratin-78) (K78) (Type-II keratin Kb40)	28	5	99	0.137931	0.0980392	0.0398918	0.492516	0	121
106	Q9UKK3	143	PARP4	PARP4	Poly [ADP-ribose] polymerase 4 (PARP-4) (EC 2.4.2.30) (193 kDa vault protein) (ADP-ribosyltransferase diphtheria toxin-like 4) (ARTD4) (PARP-related/IalphaI-related H5/proline-rich) (PH5P) (Vault poly(ADP-ribose) polymerase) (VPARP)	34	9	98	0.167488	0.176471	-0.0089829	-0.0753727	0	217
879	Q99439	1265	CNN2	CNN2	Calponin-2 (Calponin H2, smooth muscle) (Neutral calponin)	24	9	98	0.118227	0.176471	-0.058244	-0.577873	0	355
1117	P07108	1622	DBI	ACBP	Acyl-CoA-binding protein (ACBP) (Diazepam-binding inhibitor) (DBI) (Endozepine) (EP)	30	3	98	0.147783	0.0588235	0.0889597	1.32902	0	129
1184	P09622	1738	DLD	DLDH	Dihydrolipoyl dehydrogenase, mitochondrial (EC 1.8.1.4) (Dihydrolipoamide dehydrogenase) (Glycine cleavage system L protein)	23	15	98	0.1133	0.294118	-0.180817	-1.37624	49	253
1275	Q13011	1891	ECH1	ECH1	Delta(3,5)-Delta(2,4)-dienoyl-CoA isomerase, mitochondrial (EC 5.3.3.-)	23	11	98	0.1133	0.215686	-0.102386	-0.92878	1	105
1366	P13929	2027	ENO3	ENOB	Beta-enolase (EC 4.2.1.11) (2-phospho-D-glycerate hydro-lyase) (Enolase 3) (Muscle-specific enolase) (MSE) (Skeletal muscle enolase)	38	14	98	0.187192	0.27451	-0.0873177	-0.552338	42	553
1483	Q14517	2195	FAT1	FAT1	Protocadherin Fat 1 (Cadherin family member 7) (Cadherin-related tumor suppressor homolog) (Protein fat homolog) [Cleaved into: Protocadherin Fat 1, nuclear form]	35	5	98	0.172414	0.0980392	0.0743746	0.814444	1	175
2847	P00403	4513	MT-CO2	COX2	Cytochrome c oxidase subunit 2 (Cytochrome c oxidase polypeptide II)	16	10	98	0.0788177	0.196078	-0.117261	-1.31484	13	130
3028	P55769	4809	SNU13	NH2L1	NHP2-like protein 1 (High mobility group-like nuclear protein 2 homolog 1) (OTK27) (SNU13 homolog) (hSNU13) (U4/U6.U5 small nuclear ribonucleoprotein SNU13) (U4/U6.U5 tri-snRNP 15.5 kDa protein) [Cleaved into: NHP2-like protein 1, N-terminally processed]	23	3	98	0.1133	0.0588235	0.054477	0.945689	0	304
3205	Q9HD42	5119	CHMP1A	CHM1A	Charged multivesicular body protein 1a (Chromatin-modifying protein 1a) (CHMP1a) (Vacuolar protein sorting-associated protein 46-1) (Vps46-1) (hVps46-1)	40	3	98	0.197044	0.0588235	0.138221	1.74406	0	241
3416	O00592	5420	PODXL	PODXL	Podocalyxin (GCTM-2 antigen) (Gp200) (Podocalyxin-like protein 1) (PC) (PCLP-1)	46	5	98	0.226601	0.0980392	0.128562	1.20872	0	129
3520	P17612	5566	PRKACA	KAPCA	cAMP-dependent protein kinase catalytic subunit alpha (PKA C-alpha) (EC 2.7.11.11)	35	9	98	0.172414	0.176471	-0.0040568	-0.0335526	0	158
4626	P16035	7077	TIMP2	TIMP2	Metalloproteinase inhibitor 2 (CSC-21K) (Tissue inhibitor of metalloproteinases 2) (TIMP-2)	28	3	98	0.137931	0.0588235	0.0791075	1.22948	0	185
4816	P15374	7347	UCHL3	UCHL3	Ubiquitin carboxyl-terminal hydrolase isozyme L3 (UCH-L3) (EC 3.4.19.12) (Ubiquitin thioesterase L3)	33	7	98	0.162562	0.137255	0.0253067	0.244129	0	186
5147	Q9Y6E0	8428	STK24	STK24	Serine/threonine-protein kinase 24 (EC 2.7.11.1) (Mammalian STE20-like protein kinase 3) (MST-3) (STE20-like kinase MST3) [Cleaved into: Serine/threonine-protein kinase 24 36 kDa subunit (Mammalian STE20-like protein kinase 3 N-terminal) (MST3/N); Serine/threonine-protein kinase 24 12 kDa subunit (Mammalian STE20-like protein kinase 3 C-terminal) (MST3/C)]	38	7	98	0.187192	0.137255	0.0499372	0.447662	0	193
5836	Q99988	9518	GDF15	GDF15	Growth/differentiation factor 15 (GDF-15) (Macrophage inhibitory cytokine 1) (MIC-1) (NSAID-activated gene 1 protein) (NAG-1) (NSAID-regulated gene 1 protein) (NRG-1) (Placental TGF-beta) (Placental bone morphogenetic protein) (Prostate differentiation factor)	33	4	98	0.162562	0.0784314	0.0841302	1.05148	0	205
6227	P42025	10120	ACTR1B	ACTY	Beta-centractin (Actin-related protein 1B) (ARP1B)	25	2	98	0.123153	0.0392157	0.083937	1.65095	0	592
7529	Q9UPN3	23499	MACF1	MACF1	Microtubule-actin cross-linking factor 1, isoforms 1/2/3/5 (620 kDa actin-binding protein) (ABP620) (Actin cross-linking family protein 7) (Macrophin-1) (Trabeculin-alpha)	36	3	98	0.17734	0.0588235	0.118516	1.59205	0	536
7687	Q9UBB4	25814	ATXN10	ATX10	Ataxin-10 (Brain protein E46 homolog) (Spinocerebellar ataxia type 10 protein)	32	7	98	0.157635	0.137255	0.0203806	0.199735	0	116
8351	Q96HE7	30001	ERO1A	ERO1A	ERO1-like protein alpha (ERO1-L) (ERO1-L-alpha) (EC 1.8.4.-) (Endoplasmic oxidoreductin-1-like protein) (Endoplasmic reticulum oxidoreductase alpha) (Oxidoreductin-1-L-alpha)	28	11	98	0.137931	0.215686	-0.0777552	-0.644987	0	114
8371	Q9UJZ1	30968	STOML2	STML2	Stomatin-like protein 2, mitochondrial (SLP-2) (EPB72-like protein 2) (Paraprotein target 7) (Paratarg-7)	19	7	98	0.0935961	0.137255	-0.0436588	-0.552338	34	413
592	Q13557	817	CAMK2D	KCC2D	Calcium/calmodulin-dependent protein kinase type II subunit delta (CaM kinase II subunit delta) (CaMK-II subunit delta) (EC 2.7.11.17)	24	7	97	0.118227	0.137255	-0.0190283	-0.215303	0	156
931	P13073	1327	COX4I1	COX41	Cytochrome c oxidase subunit 4 isoform 1, mitochondrial (Cytochrome c oxidase polypeptide IV) (Cytochrome c oxidase subunit IV isoform 1) (COX IV-1)	26	6	97	0.128079	0.117647	0.0104318	0.122567	0	116
1395	P29323	2048	EPHB2	EPHB2	Ephrin type-B receptor 2 (EC 2.7.10.1) (Developmentally-regulated Eph-related tyrosine kinase) (ELK-related tyrosine kinase) (EPH tyrosine kinase 3) (EPH-like kinase 5) (EK5) (hEK5) (Renal carcinoma antigen NY-REN-47) (Tyrosine-protein kinase TYRO5) (Tyrosine-protein kinase receptor EPH-3)	33	5	97	0.162562	0.0980392	0.0645224	0.729555	10	419
2115	Q99729	3182	HNRNPAB	ROAA	Heterogeneous nuclear ribonucleoprotein A/B (hnRNP A/B) (APOBEC1-binding protein 1) (ABBP-1)	28	6	97	0.137931	0.117647	0.020284	0.229482	2	346
3379	P08697	5345	SERPINF2	A2AP	Alpha-2-antiplasmin (Alpha-2-AP) (Alpha-2-plasmin inhibitor) (Alpha-2-PI) (Serpin F2)	57	10	97	0.280788	0.196078	0.0847097	0.518051	1	505
4445	P40763	6774	STAT3	STAT3	Signal transducer and activator of transcription 3 (Acute-phase response factor)	29	5	97	0.142857	0.0980392	0.0448179	0.543142	0	193
4543	Q15370	6923	ELOB	ELOB	Elongin-B (EloB) (Elongin 18 kDa subunit) (RNA polymerase II transcription factor SIII subunit B) (SIII p18) (Transcription elongation factor B polypeptide 2)	23	4	97	0.1133	0.0784314	0.0348691	0.530651	0	122
7642	P48739	23760	PITPNB	PIPNB	Phosphatidylinositol transfer protein beta isoform (PI-TP-beta) (PtdIns transfer protein beta) (PtdInsTP beta)	30	8	97	0.147783	0.156863	-0.00907949	-0.08602	0	146
8246	Q9BY43	29082	CHMP4A	CHM4A	Charged multivesicular body protein 4a (Chromatin-modifying protein 4a) (CHMP4a) (SNF7 homolog associated with Alix-2) (SNF7-1) (hSnf-1) (Vacuolar protein sorting-associated protein 32-1) (Vps32-1) (hVps32-1)	36	7	97	0.17734	0.137255	0.040085	0.36966	0	158
8706	O60888	51596	CUTA	CUTA	Protein CutA (Acetylcholinesterase-associated protein) (Brain acetylcholinesterase putative membrane anchor)	23	6	97	0.1133	0.117647	-0.00434657	-0.0543111	0	104
9528	Q969H8	56005	MYDGF	MYDGF	Myeloid-derived growth factor (MYDGF) (Interleukin-25) (IL-25) (Stromal cell-derived growth factor SF20)	19	7	97	0.0935961	0.137255	-0.0436588	-0.552338	0	102
10875	Q96J02	83737	ITCH	ITCH	E3 ubiquitin-protein ligase Itchy homolog (Itch) (EC 2.3.2.26) (Atrophin-1-interacting protein 4) (AIP4) (HECT-type E3 ubiquitin transferase Itchy homolog) (NFE2-associated polypeptide 1) (NAPP1)	48	3	97	0.236453	0.0588235	0.17763	2.00709	0	274
11955	Q86YQ8	144402	CPNE8	CPNE8	Copine-8 (Copine VIII)	52	6	97	0.256158	0.117647	0.138511	1.12257	0	328
29	P49748	37	ACADVL	ACADV	Very long-chain specific acyl-CoA dehydrogenase, mitochondrial (VLCAD) (EC 1.3.8.9)	24	12	96	0.118227	0.235294	-0.117068	-0.992911	17	173
343	O43681	439	GET3	ASNA	ATPase ASNA1 (EC 3.6.-.-) (Arsenical pump-driving ATPase) (Arsenite-stimulated ATPase) (Transmembrane domain recognition complex 40 kDa ATPase subunit) (hARSA-I) (hASNA-I)	36	6	96	0.17734	0.117647	0.0596928	0.592052	0	121
1302	P98172	1947	EFNB1	EFNB1	Ephrin-B1 (EFL-3) (ELK ligand) (ELK-L) (EPH-related receptor tyrosine kinase ligand 2) (LERK-2)	35	5	96	0.172414	0.0980392	0.0743746	0.814444	0	124
1930	P12081	3035	HARS1	SYHC	Histidine--tRNA ligase, cytoplasmic (EC 6.1.1.21) (Histidyl-tRNA synthetase) (HisRS)	31	8	96	0.152709	0.156863	-0.00415339	-0.0387143	9	138
3322	P01833	5284	PIGR	PIGR	Polymeric immunoglobulin receptor (PIgR) (Poly-Ig receptor) (Hepatocellular carcinoma-associated protein TB6) [Cleaved into: Secretory component]	54	8	96	0.26601	0.156863	0.109147	0.761977	0	112
3767	P20338	5867	RAB4A	RAB4A	Ras-related protein Rab-4A	36	6	96	0.17734	0.117647	0.0596928	0.592052	0	126
4338	P62306	6636	SNRPF	RUXF	Small nuclear ribonucleoprotein F (snRNP-F) (Sm protein F) (Sm-F) (SmF)	19	2	96	0.0935961	0.0392157	0.0543804	1.25502	0	102
4785	P62987	7311	UBA52	RL40	Ubiquitin-60S ribosomal protein L40 (CEP52) (Ubiquitin A-52 residue ribosomal protein fusion product 1) [Cleaved into: Ubiquitin; 60S ribosomal protein L40 (Large ribosomal subunit protein eL40)]	49	4	96	0.241379	0.0784314	0.162948	1.6218	0	468
5471	P20042	8894	EIF2S2	IF2B	Eukaryotic translation initiation factor 2 subunit 2 (Eukaryotic translation initiation factor 2 subunit beta) (eIF-2-beta)	30	5	96	0.147783	0.0980392	0.049744	0.592052	0	169
6958	Q9UKK9	11164	NUDT5	NUDT5	ADP-sugar pyrophosphatase (EC 3.6.1.13) (8-oxo-dGDP phosphatase) (EC 3.6.1.58) (Nuclear ATP-synthesis protein NUDIX5) (EC 2.7.7.96) (Nucleoside diphosphate-linked moiety X motif 5) (Nudix motif 5) (hNUDT5) (YSA1H)	31	8	96	0.152709	0.156863	-0.00415339	-0.0387143	2	138
7066	Q14112	22795	NID2	NID2	Nidogen-2 (NID-2) (Osteonidogen)	41	5	96	0.20197	0.0980392	0.103931	1.04271	0	118
9102	A5D8V6	55048	VPS37C	VP37C	Vacuolar protein sorting-associated protein 37C (hVps37C) (ESCRT-I complex subunit VPS37C)	50	2	96	0.246305	0.0392157	0.20709	2.65095	0	219
13214	B9A064	100423062	IGLL5	IGLL5	Immunoglobulin lambda-like polypeptide 5 (G lambda-1) (Germline immunoglobulin lambda 1)	44	8	96	0.216749	0.156863	0.059886	0.466521	0	172
1249	Q14126	1829	DSG2	DSG2	Desmoglein-2 (Cadherin family member 5) (HDGC)	32	9	95	0.157635	0.176471	-0.0188351	-0.162836	0	346
2710	P25205	4172	MCM3	MCM3	DNA replication licensing factor MCM3 (EC 3.6.4.12) (DNA polymerase alpha holoenzyme-associated protein P1) (P1-MCM3) (RLF subunit beta) (p102)	26	5	95	0.128079	0.0980392	0.0300396	0.385601	0	181
3101	Q14980	4926	NUMA1	NUMA1	Nuclear mitotic apparatus protein 1 (NuMA protein) (Nuclear matrix protein-22) (NMP-22) (SP-H antigen)	29	4	95	0.142857	0.0784314	0.0644258	0.86507	0	112
4055	P23921	6240	RRM1	RIR1	Ribonucleoside-diphosphate reductase large subunit (EC 1.17.4.1) (Ribonucleoside-diphosphate reductase subunit M1) (Ribonucleotide reductase large subunit)	26	6	95	0.128079	0.117647	0.0104318	0.122567	27	125
4182	O75368	6451	SH3BGRL	SH3L1	SH3 domain-binding glutamic acid-rich-like protein	26	3	95	0.128079	0.0588235	0.0692553	1.12257	0	172
4420	O76094	6731	SRP72	SRP72	Signal recognition particle subunit SRP72 (SRP72) (Signal recognition particle 72 kDa protein)	29	3	95	0.142857	0.0588235	0.0840336	1.28011	0	110
4471	Q13277	6809	STX3	STX3	Syntaxin-3	33	5	95	0.162562	0.0980392	0.0645224	0.729555	0	248
5307	O75821	8666	EIF3G	EIF3G	Eukaryotic translation initiation factor 3 subunit G (eIF3g) (Eukaryotic translation initiation factor 3 RNA-binding subunit) (eIF-3 RNA-binding subunit) (Eukaryotic translation initiation factor 3 subunit 4) (eIF-3-delta) (eIF3 p42) (eIF3 p44)	23	4	95	0.1133	0.0784314	0.0348691	0.530651	0	127
5614	O14964	9146	HGS	HGS	Hepatocyte growth factor-regulated tyrosine kinase substrate (Hrs) (Protein pp110)	33	5	95	0.162562	0.0980392	0.0645224	0.729555	0	129
6481	O75947	10476	ATP5PD	ATP5H	ATP synthase subunit d, mitochondrial (ATPase subunit d)	21	11	95	0.103448	0.215686	-0.112238	-1.06002	0	112
8229	Q9ULC4	28985	MCTS1	MCTS1	Malignant T-cell-amplified sequence 1 (MCT-1) (Multiple copies T-cell malignancies)	28	3	95	0.137931	0.0588235	0.0791075	1.22948	0	104
8368	Q9NZN4	30846	EHD2	EHD2	EH domain-containing protein 2 (PAST homolog 2)	39	5	95	0.192118	0.0980392	0.094079	0.970564	0	404
9772	Q9HCY8	57402	S100A14	S10AE	Protein S100-A14 (S100 calcium-binding protein A14) (S114)	32	8	95	0.157635	0.156863	0.000772723	0.00708942	0	98
11784	Q8NCW5	128240	NAXE	NNRE	NAD(P)H-hydrate epimerase (EC 5.1.99.6) (Apolipoprotein A-I-binding protein) (AI-BP) (NAD(P)HX epimerase) (YjeF N-terminal domain-containing protein 1) (YjeF_N1)	22	6	95	0.108374	0.117647	-0.00927267	-0.118441	0	116
13071	Q5T749	448834	KPRP	KPRP	Keratinocyte proline-rich protein (hKPRP)	32	4	95	0.157635	0.0784314	0.0792041	1.00709	0	177
511	P09871	716	C1S	C1S	Complement C1s subcomponent (EC 3.4.21.42) (C1 esterase) (Complement component 1 subcomponent s) [Cleaved into: Complement C1s subcomponent heavy chain; Complement C1s subcomponent light chain]	36	6	94	0.17734	0.117647	0.0596928	0.592052	7	514
588	O43852	813	CALU	CALU	Calumenin (Crocalbin) (IEF SSP 9302)	24	15	94	0.118227	0.294118	-0.175891	-1.31484	0	132
834	Q99426	1155	TBCB	TBCB	Tubulin-folding cofactor B (Cytoskeleton-associated protein 1) (Cytoskeleton-associated protein CKAPI) (Tubulin-specific chaperone B)	31	3	94	0.152709	0.0588235	0.0938858	1.37632	0	104
1403	P07099	2052	EPHX1	HYEP	Epoxide hydrolase 1 (EC 3.3.2.9) (Epoxide hydratase) (Microsomal epoxide hydrolase)	38	4	94	0.187192	0.0784314	0.108761	1.25502	5	223
2147	P00739	3250	HPR	HPTR	Haptoglobin-related protein	40	9	94	0.197044	0.176471	0.0205737	0.159093	7	514
2174	P0DMV9	3304	HSPA1B	HS71B	Heat shock 70 kDa protein 1B (Heat shock 70 kDa protein 2) (HSP70-2) (HSP70.2)	15	3	94	0.0738916	0.0588235	0.0150681	0.329018	0	94
3390	Q14651	5357	PLS1	PLSI	Plastin-1 (Intestine-specific plastin) (I-plastin)	34	12	94	0.167488	0.235294	-0.0678064	-0.49041	0	536
3483	Q15257	5524	PTPA	PTPA	Serine/threonine-protein phosphatase 2A activator (EC 5.2.1.8) (PP2A, subunit B', PR53 isoform) (Phosphotyrosyl phosphatase activator) (PTPA) (Serine/threonine-protein phosphatase 2A regulatory subunit 4) (Serine/threonine-protein phosphatase 2A regulatory subunit B')	27	6	94	0.133005	0.117647	0.0153579	0.177014	0	124
4180	O43765	6449	SGTA	SGTA	Small glutamine-rich tetratricopeptide repeat-containing protein alpha (Alpha-SGT) (Vpu-binding protein) (UBP)	28	8	94	0.137931	0.156863	-0.0189317	-0.185556	37	199
4534	P05543	6906	SERPINA7	THBG	Thyroxine-binding globulin (Serpin A7) (T4-binding globulin)	59	9	94	0.29064	0.176471	0.11417	0.719807	1	505
5609	O14737	9141	PDCD5	PDCD5	Programmed cell death protein 5 (TF-1 cell apoptosis-related protein 19) (Protein TFAR19)	25	3	94	0.123153	0.0588235	0.0643292	1.06598	0	103
6637	Q15126	10654	PMVK	PMVK	Phosphomevalonate kinase (PMKase) (hPMK) (EC 2.7.4.2)	29	2	94	0.142857	0.0392157	0.103641	1.86507	0	98
6983	Q9Y5B9	11198	SUPT16H	SP16H	FACT complex subunit SPT16 (Chromatin-specific transcription elongation factor 140 kDa subunit) (FACT 140 kDa subunit) (FACTp140) (Facilitates chromatin transcription complex subunit SPT16) (hSPT16)	33	3	94	0.162562	0.0588235	0.103738	1.46652	0	115
7297	Q14156	23167	EFR3A	EFR3A	Protein EFR3 homolog A (Protein EFR3-like)	40	3	94	0.197044	0.0588235	0.138221	1.74406	0	115
8650	Q9UHG3	51449	PCYOX1	PCYOX	Prenylcysteine oxidase 1 (EC 1.8.3.5) (Prenylcysteine lyase)	34	10	94	0.167488	0.196078	-0.0285907	-0.227376	0	117
8718	Q9UI12	51606	ATP6V1H	VATH	V-type proton ATPase subunit H (V-ATPase subunit H) (Nef-binding protein 1) (NBP1) (Protein VMA13 homolog) (V-ATPase 50/57 kDa subunits) (Vacuolar proton pump subunit H) (Vacuolar proton pump subunit SFD)	36	7	94	0.17734	0.137255	0.040085	0.36966	0	134
9498	Q9NQ84	55890	GPRC5C	GPC5C	G-protein coupled receptor family C group 5 member C (Retinoic acid-induced gene 3 protein) (RAIG-3)	50	5	94	0.246305	0.0980392	0.148266	1.32902	0	112
9512	Q9P258	55920	RCC2	RCC2	Protein RCC2 (RCC1-like protein TD-60) (Telophase disk protein of 60 kDa)	29	5	94	0.142857	0.0980392	0.0448179	0.543142	2	154
12541	Q8NHG7	258010	SVIP	SVIP	Small VCP/p97-interacting protein	30	4	94	0.147783	0.0784314	0.0693519	0.91398	0	96
54	P68133	58	ACTA1	ACTS	Actin, alpha skeletal muscle (Alpha-actin-1)	41	9	93	0.20197	0.176471	0.0254999	0.194716	0	592
506	P05155	710	SERPING1	IC1	Plasma protease C1 inhibitor (C1 Inh) (C1Inh) (C1 esterase inhibitor) (C1-inhibiting factor) (Serpin G1)	48	9	93	0.236453	0.176471	0.0599826	0.422127	1	505
900	P20908	1289	COL5A1	CO5A1	Collagen alpha-1(V) chain	32	10	93	0.157635	0.196078	-0.038443	-0.314839	0	292
1928	Q16836	3033	HADH	HCDH	Hydroxyacyl-coenzyme A dehydrogenase, mitochondrial (HCDH) (EC 1.1.1.35) (Medium and short-chain L-3-hydroxyacyl-coenzyme A dehydrogenase) (Short-chain 3-hydroxyacyl-CoA dehydrogenase)	15	11	93	0.0738916	0.215686	-0.141795	-1.54545	11	153
1963	Q00341	3069	HDLBP	VIGLN	Vigilin (High density lipoprotein-binding protein) (HDL-binding protein)	32	5	93	0.157635	0.0980392	0.0595963	0.685161	0	121
3398	Q9UIW2	5361	PLXNA1	PLXA1	Plexin-A1 (Semaphorin receptor NOV)	36	5	93	0.17734	0.0980392	0.0793007	0.855086	0	145
3572	P04156	5621	PRNP	PRIO	Major prion protein (PrP) (ASCR) (PrP27-30) (PrP33-35C) (CD antigen CD230)	23	4	93	0.1133	0.0784314	0.0348691	0.530651	0	115
3742	Q92692	5819	NECTIN2	NECT2	Nectin-2 (Herpes virus entry mediator B) (Herpesvirus entry mediator B) (HveB) (Nectin cell adhesion molecule 2) (Poliovirus receptor-related protein 2) (CD antigen CD112)	41	6	93	0.20197	0.117647	0.0843234	0.779679	0	115
3819	P10114	5911	RAP2A	RAP2A	Ras-related protein Rap-2a (RbBP-30)	30	2	93	0.147783	0.0392157	0.108568	1.91398	0	533
4795	P61077	7323	UBE2D3	UB2D3	Ubiquitin-conjugating enzyme E2 D3 (EC 2.3.2.23) ((E3-independent) E2 ubiquitin-conjugating enzyme D3) (EC 2.3.2.24) (E2 ubiquitin-conjugating enzyme D3) (Ubiquitin carrier protein D3) (Ubiquitin-conjugating enzyme E2(17)KB 3) (Ubiquitin-conjugating enzyme E2-17 kDa 3) (Ubiquitin-protein ligase D3)	23	2	93	0.1133	0.0392157	0.0740848	1.53065	0	276
4892	Q15056	7458	EIF4H	IF4H	Eukaryotic translation initiation factor 4H (eIF-4H) (Williams-Beuren syndrome chromosomal region 1 protein)	33	6	93	0.162562	0.117647	0.0449145	0.466521	2	346
6367	O95197	10313	RTN3	RTN3	Reticulon-3 (Homolog of ASY protein) (HAP) (Neuroendocrine-specific protein-like 2) (NSP-like protein 2) (Neuroendocrine-specific protein-like II) (NSP-like protein II) (NSPLII)	21	8	93	0.103448	0.156863	-0.0534145	-0.600593	0	259
7110	O94979	22872	SEC31A	SC31A	Protein transport protein Sec31A (ABP125) (ABP130) (SEC31-like protein 1) (SEC31-related protein A) (Web1-like protein)	32	4	93	0.157635	0.0784314	0.0792041	1.00709	0	130
7629	Q86Y82	23673	STX12	STX12	Syntaxin-12	43	5	93	0.211823	0.0980392	0.113783	1.11143	0	217
7972	O43617	27095	TRAPPC3	TPPC3	Trafficking protein particle complex subunit 3 (BET3 homolog)	24	3	93	0.118227	0.0588235	0.0594031	1.00709	0	106
8052	P38159	27316	RBMX	RBMX	RNA-binding motif protein, X chromosome (Glycoprotein p43) (Heterogeneous nuclear ribonucleoprotein G) (hnRNP G) [Cleaved into: RNA-binding motif protein, X chromosome, N-terminally processed]	25	3	93	0.123153	0.0588235	0.0643292	1.06598	0	118
8673	Q9UI30	51504	TRMT112	TR112	Multifunctional methyltransferase subunit TRM112-like protein (tRNA methyltransferase 112 homolog)	23	3	93	0.1133	0.0588235	0.054477	0.945689	0	115
10022	Q96A65	60412	EXOC4	EXOC4	Exocyst complex component 4 (Exocyst complex component Sec8)	38	6	93	0.187192	0.117647	0.0695451	0.670054	0	115
10217	Q96BJ3	64853	AIDA	AIDA	Axin interactor, dorsalization-associated protein (Axin interaction partner and dorsalization antagonist)	40	6	93	0.197044	0.117647	0.0793973	0.744055	0	114
1	P04217	1	A1BG	A1BG	Alpha-1B-glycoprotein (Alpha-1-B glycoprotein)	41	12	92	0.20197	0.235294	-0.0333237	-0.220321	0	106
654	O75828	874	CBR3	CBR3	Carbonyl reductase [NADPH] 3 (EC 1.1.1.184) (NADPH-dependent carbonyl reductase 3) (Short chain dehydrogenase/reductase family 21C member 2)	27	8	92	0.133005	0.156863	-0.0238578	-0.238023	9	300
889	P08123	1278	COL1A2	CO1A2	Collagen alpha-2(I) chain (Alpha-2 type I collagen)	38	8	92	0.187192	0.156863	0.0303294	0.255017	0	292
1970	P08603	3075	CFH	CFAH	Complement factor H (H factor 1)	33	10	92	0.162562	0.196078	-0.0335169	-0.270445	0	127
2386	Q9BY32	3704	ITPA	ITPA	Inosine triphosphate pyrophosphatase (ITPase) (Inosine triphosphatase) (EC 3.6.1.9) (Non-canonical purine NTP pyrophosphatase) (Non-standard purine NTP pyrophosphatase) (Nucleoside-triphosphate diphosphatase) (Nucleoside-triphosphate pyrophosphatase) (NTPase) (Putative oncogene protein hlc14-06-p)	24	2	92	0.118227	0.0392157	0.0790109	1.59205	7	108
3264	Q99471	5204	PFDN5	PFD5	Prefoldin subunit 5 (C-Myc-binding protein Mm-1) (Myc modulator 1)	20	3	92	0.0985222	0.0588235	0.0396986	0.744055	0	102
4072	P26447	6275	S100A4	S10A4	Protein S100-A4 (Calvasculin) (Metastasin) (Placental calcium-binding protein) (Protein Mts1) (S100 calcium-binding protein A4)	29	5	92	0.142857	0.0980392	0.0448179	0.543142	0	108
4118	P22307	6342	SCP2	NLTP	Non-specific lipid-transfer protein (NSL-TP) (EC 2.3.1.176) (Propanoyl-CoA C-acyltransferase) (SCP-chi) (SCPX) (Sterol carrier protein 2) (SCP-2) (Sterol carrier protein X) (SCP-X)	24	8	92	0.118227	0.156863	-0.0386361	-0.407948	0	109
4172	Q16629	6432	SRSF7	SRSF7	Serine/arginine-rich splicing factor 7 (Splicing factor 9G8) (Splicing factor, arginine/serine-rich 7)	21	7	92	0.103448	0.137255	-0.0338066	-0.407948	0	199
4700	P09493	7168	TPM1	TPM1	Tropomyosin alpha-1 chain (Alpha-tropomyosin) (Tropomyosin-1)	30	8	92	0.147783	0.156863	-0.00907949	-0.08602	0	321
4761	P23258	7283	TUBG1	TBG1	Tubulin gamma-1 chain (Gamma-1-tubulin) (Gamma-tubulin complex component 1) (GCP-1)	31	3	92	0.152709	0.0588235	0.0938858	1.37632	0	544
5164	O75882	8455	ATRN	ATRN	Attractin (DPPT-L) (Mahogany homolog)	37	7	92	0.182266	0.137255	0.0450111	0.409188	0	109
5592	O00151	9124	PDLIM1	PDLI1	PDZ and LIM domain protein 1 (C-terminal LIM domain protein 1) (Elfin) (LIM domain protein CLP-36)	34	6	92	0.167488	0.117647	0.0498406	0.50959	0	185
5989	Q9H2G2	9748	SLK	SLK	STE20-like serine/threonine-protein kinase (STE20-like kinase) (hSLK) (EC 2.7.11.1) (CTCL tumor antigen se20-9) (STE20-related serine/threonine-protein kinase) (STE20-related kinase) (Serine/threonine-protein kinase 2)	47	5	92	0.231527	0.0980392	0.133488	1.23975	0	150
6619	Q15063	10631	POSTN	POSTN	Periostin (PN) (Osteoblast-specific factor 2) (OSF-2)	40	6	92	0.197044	0.117647	0.0793973	0.744055	0	258
6754	O75954	10867	TSPAN9	TSN9	Tetraspanin-9 (Tspan-9) (Tetraspan NET-5)	30	2	92	0.147783	0.0392157	0.108568	1.91398	0	453
6890	O43809	11051	NUDT21	CPSF5	Cleavage and polyadenylation specificity factor subunit 5 (Cleavage and polyadenylation specificity factor 25 kDa subunit) (CFIm25) (CPSF 25 kDa subunit) (Nucleoside diphosphate-linked moiety X motif 21) (Nudix motif 21) (Pre-mRNA cleavage factor Im 25 kDa subunit)	21	4	92	0.103448	0.0784314	0.0250169	0.399407	0	107
9525	Q9UHR4	55971	BAIAP2L1	BI2L1	Brain-specific angiogenesis inhibitor 1-associated protein 2-like protein 1 (BAI1-associated protein 2-like protein 1) (Insulin receptor tyrosine kinase substrate)	41	5	92	0.20197	0.0980392	0.103931	1.04271	0	110
10202	Q9H6S3	64787	EPS8L2	ES8L2	Epidermal growth factor receptor kinase substrate 8-like protein 2 (EPS8-like protein 2) (Epidermal growth factor receptor pathway substrate 8-related protein 2) (EPS8-related protein 2)	45	3	92	0.221675	0.0588235	0.162851	1.91398	0	176
10706	O43169	80777	CYB5B	CYB5B	Cytochrome b5 type B (Cytochrome b5 outer mitochondrial membrane isoform)	21	1	92	0.103448	0.0196078	0.0838404	2.39941	0	137
22	Q13085	31	ACACA	ACACA	Acetyl-CoA carboxylase 1 (ACC1) (EC 6.4.1.2) (ACC-alpha) [Includes: Biotin carboxylase (EC 6.3.4.14)]	34	4	91	0.167488	0.0784314	0.0890563	1.09455	28	131
64	O96019	86	ACTL6A	ACL6A	Actin-like protein 6A (53 kDa BRG1-associated factor A) (Actin-related protein Baf53a) (ArpNbeta) (BRG1-associated factor 53A) (BAF53A) (INO80 complex subunit K)	24	3	91	0.118227	0.0588235	0.0594031	1.00709	0	592
906	P12110	1292	COL6A2	CO6A2	Collagen alpha-2(VI) chain	36	4	91	0.17734	0.0784314	0.0989085	1.17701	0	116
1193	P36957	1743	DLST	ODO2	Dihydrolipoyllysine-residue succinyltransferase component of 2-oxoglutarate dehydrogenase complex, mitochondrial (EC 2.3.1.61) (2-oxoglutarate dehydrogenase complex component E2) (OGDC-E2) (Dihydrolipoamide succinyltransferase component of 2-oxoglutarate dehydrogenase complex) (E2K)	29	12	91	0.142857	0.235294	-0.092437	-0.719892	53	172
2105	Q01581	3157	HMGCS1	HMCS1	Hydroxymethylglutaryl-CoA synthase, cytoplasmic (HMG-CoA synthase) (EC 2.3.3.10) (3-hydroxy-3-methylglutaryl coenzyme A synthase)	28	5	91	0.137931	0.0980392	0.0398918	0.492516	2	118
2556	P01130	3949	LDLR	LDLR	Low-density lipoprotein receptor (LDL receptor)	20	6	91	0.0985222	0.117647	-0.0191249	-0.255945	0	109
3336	P42356	5297	PI4KA	PI4KA	Phosphatidylinositol 4-kinase alpha (PI4-kinase alpha) (PI4K-alpha) (PtdIns-4-kinase alpha) (EC 2.7.1.67)	36	3	91	0.17734	0.0588235	0.118516	1.59205	0	267
4328	P14678	6628	SNRPB	RSMB	Small nuclear ribonucleoprotein-associated proteins B and B' (snRNP-B) (Sm protein B/B') (Sm-B/B') (SmB/B')	18	4	91	0.08867	0.0784314	0.0102386	0.177014	0	249
4750	Q99615	7266	DNAJC7	DNJC7	DnaJ homolog subfamily C member 7 (Tetratricopeptide repeat protein 2) (TPR repeat protein 2)	34	4	91	0.167488	0.0784314	0.0890563	1.09455	8	327
5229	O00203	8546	AP3B1	AP3B1	AP-3 complex subunit beta-1 (Adaptor protein complex AP-3 subunit beta-1) (Adaptor-related protein complex 3 subunit beta-1) (Beta-3A-adaptin) (Clathrin assembly protein complex 3 beta-1 large chain)	35	6	91	0.172414	0.117647	0.0547667	0.55141	0	318
5596	Q9UQE7	9126	SMC3	SMC3	Structural maintenance of chromosomes protein 3 (SMC protein 3) (SMC-3) (Basement membrane-associated chondroitin proteoglycan) (Bamacan) (Chondroitin sulfate proteoglycan 6) (Chromosome-associated polypeptide) (hCAP)	32	5	91	0.157635	0.0980392	0.0595963	0.685161	2	175
10213	Q96EK6	64841	GNPNAT1	GNA1	Glucosamine 6-phosphate N-acetyltransferase (EC 2.3.1.4) (Phosphoglucosamine acetylase) (Phosphoglucosamine transacetylase)	20	5	91	0.0985222	0.0980392	0.000482952	0.00708942	6	113
10458	Q8TEX9	79711	IPO4	IPO4	Importin-4 (Imp4) (Importin-4b) (Imp4b) (Ran-binding protein 4) (RanBP4)	28	4	91	0.137931	0.0784314	0.0594997	0.814444	0	118
10856	Q9NP97	83658	DYNLRB1	DLRB1	Dynein light chain roadblock-type 1 (Bithoraxoid-like protein) (BLP) (Dynein light chain 2A, cytoplasmic) (Dynein-associated protein Km23) (Roadblock domain-containing protein 1)	21	2	91	0.103448	0.0392157	0.0642326	1.39941	0	114
13081	Q9H3K6	552900	BOLA2	BOLA2	BolA-like protein 2	21	2	91	0.103448	0.0392157	0.0642326	1.39941	0	97
867	P09497	1212	CLTB	CLCB	Clathrin light chain B (Lcb)	30	5	90	0.147783	0.0980392	0.049744	0.592052	0	196
978	P46108	1398	CRK	CRK	Adapter molecule crk (Proto-oncogene c-Crk) (p38)	29	3	90	0.142857	0.0588235	0.0840336	1.28011	0	126
1408	Q12929	2059	EPS8	EPS8	Epidermal growth factor receptor kinase substrate 8	42	9	90	0.206897	0.176471	0.030426	0.229482	0	176
1511	O75487	2239	GPC4	GPC4	Glypican-4 (K-glypican) [Cleaved into: Secreted glypican-4]	31	7	90	0.152709	0.137255	0.0154545	0.153931	0	239
1718	P60983	2764	GMFB	GMFB	Glia maturation factor beta (GMF-beta)	25	3	90	0.123153	0.0588235	0.0643292	1.06598	0	132
2060	P30508	3107	#N/A	1C12	HLA class I histocompatibility antigen, Cw-12 alpha chain (MHC class I antigen Cw*12)	23	5	90	0.1133	0.0980392	0.0152613	0.208723	0	372
2508	Q86UP2	3895	KTN1	KTN1	Kinectin (CG-1 antigen) (Kinesin receptor)	28	7	90	0.137931	0.137255	0.000676133	0.00708942	0	101
2676	O00754	4125	MAN2B1	MA2B1	Lysosomal alpha-mannosidase (Laman) (EC 3.2.1.24) (Lysosomal acid alpha-mannosidase) (Mannosidase alpha class 2B member 1) (Mannosidase alpha-B) [Cleaved into: Lysosomal alpha-mannosidase A peptide; Lysosomal alpha-mannosidase B peptide; Lysosomal alpha-mannosidase C peptide; Lysosomal alpha-mannosidase D peptide; Lysosomal alpha-mannosidase E peptide]	26	5	90	0.128079	0.0980392	0.0300396	0.385601	0	175
3662	O75832	5716	PSMD10	PSD10	26S proteasome non-ATPase regulatory subunit 10 (26S proteasome regulatory subunit p28) (Gankyrin) (p28(GANK))	20	6	90	0.0985222	0.117647	-0.0191249	-0.255945	5	373
4829	P11172	7372	UMPS	UMPS	Uridine 5'-monophosphate synthase (UMP synthase) [Includes: Orotate phosphoribosyltransferase (OPRT) (OPRTase) (EC 2.4.2.10); Orotidine 5'-phosphate decarboxylase (ODC) (EC 4.1.1.23) (OMPdecase)]	29	5	90	0.142857	0.0980392	0.0448179	0.543142	2	122
4885	P04275	7450	VWF	VWF	von Willebrand factor (vWF) [Cleaved into: von Willebrand antigen 2 (von Willebrand antigen II)]	41	9	90	0.20197	0.176471	0.0254999	0.194716	0	107
5008	Q00765	7905	REEP5	REEP5	Receptor expression-enhancing protein 5 (Polyposis locus protein 1) (Protein TB2)	15	5	90	0.0738916	0.0980392	-0.0241476	-0.407948	0	136
5371	Q13310	8761	PABPC4	PABP4	Polyadenylate-binding protein 4 (PABP-4) (Poly(A)-binding protein 4) (Activated-platelet protein 1) (APP-1) (Inducible poly(A)-binding protein) (iPABP)	30	7	90	0.147783	0.137255	0.0105283	0.106625	0	275
5431	O43490	8842	PROM1	PROM1	Prominin-1 (Antigen AC133) (Prominin-like protein 1) (CD antigen CD133)	37	9	90	0.182266	0.176471	0.00579542	0.0466178	0	143
6027	Q12765	9805	SCRN1	SCRN1	Secernin-1	30	8	90	0.147783	0.156863	-0.00907949	-0.08602	3	109
6849	Q92905	10987	COPS5	CSN5	COP9 signalosome complex subunit 5 (SGN5) (Signalosome subunit 5) (EC 3.4.-.-) (Jun activation domain-binding protein 1)	29	8	90	0.142857	0.156863	-0.0140056	-0.13493	0	304
7608	O60684	23633	KPNA6	IMA7	Importin subunit alpha-7 (Karyopherin subunit alpha-6)	17	3	90	0.0837438	0.0588235	0.0249203	0.50959	0	197
8074	Q9NZL9	27430	MAT2B	MAT2B	Methionine adenosyltransferase 2 subunit beta (Methionine adenosyltransferase II beta) (MAT II beta) (Putative dTDP-4-keto-6-deoxy-D-glucose 4-reductase)	32	6	90	0.157635	0.117647	0.0399884	0.422127	4	109
8314	Q96IJ6	29926	GMPPA	GMPPA	Mannose-1-phosphate guanyltransferase alpha (GDP-mannose pyrophosphorylase A) (GMPP-alpha) (GTP-mannose-1-phosphate guanylyltransferase alpha)	37	6	90	0.182266	0.117647	0.064619	0.63158	1	155
8846	P99999	54205	CYCS	CYC	Cytochrome c	19	5	90	0.0935961	0.0980392	-0.00444316	-0.0669112	0	116
9035	Q9NX76	54918	CMTM6	CKLF6	CKLF-like MARVEL transmembrane domain-containing protein 6 (Chemokine-like factor superfamily member 6)	18	7	90	0.08867	0.137255	-0.048585	-0.63034	0	253
12434	Q7Z7H5	222068	TMED4	TMED4	Transmembrane emp24 domain-containing protein 4 (Endoplasmic reticulum stress-response protein 25) (ERS25) (GMP25iso) (Putative NF-kappa-B-activating protein 156) (p24 family protein alpha-3) (p24alpha3)	26	6	90	0.128079	0.117647	0.0104318	0.122567	0	175
494	Q10589	684	BST2	BST2	Bone marrow stromal antigen 2 (BST-2) (HM1.24 antigen) (Tetherin) (CD antigen CD317)	31	3	89	0.152709	0.0588235	0.0938858	1.37632	0	110
954	P14384	1368	CPM	CBPM	Carboxypeptidase M (CPM) (EC 3.4.17.12)	40	9	89	0.197044	0.176471	0.0205737	0.159093	0	245
1021	Q6UVK1	1464	CSPG4	CSPG4	Chondroitin sulfate proteoglycan 4 (Chondroitin sulfate proteoglycan NG2) (Melanoma chondroitin sulfate proteoglycan) (Melanoma-associated chondroitin sulfate proteoglycan)	34	7	89	0.167488	0.137255	0.0302328	0.287197	0	100
1260	P23919	1841	DTYMK	KTHY	Thymidylate kinase (EC 2.7.4.9) (dTMP kinase)	24	5	89	0.118227	0.0980392	0.0201874	0.270124	2	107
1262	P51452	1845	DUSP3	DUS3	Dual specificity protein phosphatase 3 (EC 3.1.3.16) (EC 3.1.3.48) (Dual specificity protein phosphatase VHR) (Vaccinia H1-related phosphatase) (VHR)	28	5	89	0.137931	0.0980392	0.0398918	0.492516	0	170
1802	Q13098	2873	GPS1	CSN1	COP9 signalosome complex subunit 1 (SGN1) (Signalosome subunit 1) (G protein pathway suppressor 1) (GPS-1) (JAB1-containing signalosome subunit 1) (Protein MFH)	21	6	89	0.103448	0.117647	-0.0141988	-0.185556	0	115
2217	P14735	3416	IDE	IDE	Insulin-degrading enzyme (EC 3.4.24.56) (Abeta-degrading protease) (Insulin protease) (Insulinase) (Insulysin)	32	9	89	0.157635	0.176471	-0.0188351	-0.162836	1	137
2265	P01861	3503	IGHG4	IGHG4	Immunoglobulin heavy constant gamma 4 (Ig gamma-4 chain C region)	39	11	89	0.192118	0.215686	-0.023568	-0.16694	0	89
2817	P25325	4357	MPST	THTM	3-mercaptopyruvate sulfurtransferase (MST) (EC 2.8.1.2)	41	7	89	0.20197	0.137255	0.0647155	0.557287	15	128
4712	P12270	7175	TPR	TPR	Nucleoprotein TPR (Megator) (NPC-associated intranuclear protein) (Translocated promoter region protein)	16	6	89	0.0788177	0.117647	-0.0388293	-0.577873	0	105
5246	Q92945	8570	KHSRP	FUBP2	Far upstream element-binding protein 2 (FUSE-binding protein 2) (KH type-splicing regulatory protein) (KSRP) (p75)	27	6	89	0.133005	0.117647	0.0153579	0.177014	0	122
5914	P05161	9636	ISG15	ISG15	Ubiquitin-like protein ISG15 (Interferon-induced 15 kDa protein) (Interferon-induced 17 kDa protein) (IP17) (Ubiquitin cross-reactive protein) (hUCRP)	22	1	89	0.108374	0.0196078	0.0887665	2.46652	0	468
6131	O14979	9987	HNRNPDL	HNRDL	Heterogeneous nuclear ribonucleoprotein D-like (hnRNP D-like) (hnRNP DL) (AU-rich element RNA-binding factor) (JKT41-binding protein) (Protein laAUF1)	34	7	89	0.167488	0.137255	0.0302328	0.287197	0	105
6383	Q9Y2B0	10330	CNPY2	CNPY2	Protein canopy homolog 2 (MIR-interacting saposin-like protein) (Putative secreted protein Zsig9) (Transmembrane protein 4)	15	7	89	0.0738916	0.137255	-0.0633633	-0.893375	0	98
6711	Q13576	10788	IQGAP2	IQGA2	Ras GTPase-activating-like protein IQGAP2	31	10	89	0.152709	0.196078	-0.0433691	-0.360642	0	360
7556	Q9Y5L0	23534	TNPO3	TNPO3	Transportin-3 (Importin-12) (Imp12) (Transportin-SR) (TRN-SR)	20	5	89	0.0985222	0.0980392	0.000482952	0.00708942	0	112
7741	Q9C0B5	25921	ZDHHC5	ZDHC5	Palmitoyltransferase ZDHHC5 (EC 2.3.1.225) (Zinc finger DHHC domain-containing protein 5) (DHHC-5) (Zinc finger protein 375)	35	1	89	0.172414	0.0196078	0.152806	3.13637	0	133
7742	Q6DD88	25923	ATL3	ATLA3	Atlastin-3 (EC 3.6.5.-)	30	8	89	0.147783	0.156863	-0.00907949	-0.08602	0	161
8278	Q9NYL9	29766	TMOD3	TMOD3	Tropomodulin-3 (Ubiquitous tropomodulin) (U-Tmod)	27	6	89	0.133005	0.117647	0.0153579	0.177014	0	144
11540	Q96PY5	114793	FMNL2	FMNL2	Formin-like protein 2 (Formin homology 2 domain-containing protein 2)	36	3	89	0.17734	0.0588235	0.118516	1.59205	0	181
244	P02743	325	APCS	SAMP	Serum amyloid P-component (SAP) (9.5S alpha-1-glycoprotein) [Cleaved into: Serum amyloid P-component(1-203)]	48	9	88	0.236453	0.176471	0.0599826	0.422127	0	104
288	P61204	377	ARF3	ARF3	ADP-ribosylation factor 3	52	5	88	0.256158	0.0980392	0.158118	1.3856	0	533
567	P54289	781	CACNA2D1	CA2D1	Voltage-dependent calcium channel subunit alpha-2/delta-1 (Voltage-gated calcium channel subunit alpha-2/delta-1) [Cleaved into: Voltage-dependent calcium channel subunit alpha-2-1; Voltage-dependent calcium channel subunit delta-1]	47	7	88	0.231527	0.137255	0.0942722	0.754323	0	110
1019	P13611	1462	VCAN	CSPG2	Versican core protein (Chondroitin sulfate proteoglycan core protein 2) (Chondroitin sulfate proteoglycan 2) (Glial hyaluronate-binding protein) (GHAP) (Large fibroblast proteoglycan) (PG-M)	38	1	88	0.187192	0.0196078	0.167584	3.25502	0	109
1104	P61803	1603	DAD1	DAD1	Dolichyl-diphosphooligosaccharide--protein glycosyltransferase subunit DAD1 (Oligosaccharyl transferase subunit DAD1) (Defender against cell death 1) (DAD-1)	18	5	88	0.08867	0.0980392	-0.00936926	-0.144914	0	113
1360	P17813	2022	ENG	EGLN	Endoglin (CD antigen CD105)	30	10	88	0.147783	0.196078	-0.0482952	-0.407948	0	113
1421	P22087	2091	FBL	FBRL	rRNA 2'-O-methyltransferase fibrillarin (EC 2.1.1.-) (34 kDa nucleolar scleroderma antigen) (Histone-glutamine methyltransferase)	28	6	88	0.137931	0.117647	0.020284	0.229482	0	113
1683	P15291	2683	B4GALT1	B4GT1	Beta-1,4-galactosyltransferase 1 (Beta-1,4-GalTase 1) (Beta4Gal-T1) (b4Gal-T1) (EC 2.4.1.-) (UDP-Gal:beta-GlcNAc beta-1,4-galactosyltransferase 1) (UDP-galactose:beta-N-acetylglucosamine beta-1,4-galactosyltransferase 1) [Cleaved into: Processed beta-1,4-galactosyltransferase 1] [Includes: Lactose synthase A protein (EC 2.4.1.22); N-acetyllactosamine synthase (EC 2.4.1.90) (Nal synthase); Beta-N-…	21	6	88	0.103448	0.117647	-0.0141988	-0.185556	0	132
1846	P15170	2935	GSPT1	ERF3A	Eukaryotic peptide chain release factor GTP-binding subunit ERF3A (Eukaryotic peptide chain release factor subunit 3a) (eRF3a) (G1 to S phase transition protein 1 homolog)	28	8	88	0.137931	0.156863	-0.0189317	-0.185556	0	511
1910	P10412	3008	H1-4	H14	Histone H1.4 (Histone H1b) (Histone H1s-4)	48	8	88	0.236453	0.156863	0.0795905	0.592052	0	299
2310	P29218	3612	IMPA1	IMPA1	Inositol monophosphatase 1 (IMP 1) (IMPase 1) (EC 3.1.3.25) (D-galactose 1-phosphate phosphatase) (EC 3.1.3.94) (Inositol-1(or 4)-monophosphatase 1) (Lithium-sensitive myo-inositol monophosphatase A1)	29	11	88	0.142857	0.215686	-0.0728291	-0.594361	5	116
2377	Q06033	3699	ITIH3	ITIH3	Inter-alpha-trypsin inhibitor heavy chain H3 (ITI heavy chain H3) (ITI-HC3) (Inter-alpha-inhibitor heavy chain 3) (Serum-derived hyaluronan-associated protein) (SHAP)	51	9	88	0.251232	0.176471	0.0747609	0.50959	4	296
2473	P08729	3855	KRT7	K2C7	Keratin, type II cytoskeletal 7 (Cytokeratin-7) (CK-7) (Keratin-7) (K7) (Sarcolectin) (Type-II keratin Kb7)	36	11	88	0.17734	0.215686	-0.0383464	-0.282417	0	437
3654	P55036	5710	PSMD4	PSMD4	26S proteasome non-ATPase regulatory subunit 4 (26S proteasome regulatory subunit RPN10) (26S proteasome regulatory subunit S5A) (Antisecretory factor 1) (AF) (ASF) (Multiubiquitin chain-binding protein)	26	6	88	0.128079	0.117647	0.0104318	0.122567	0	111
3975	P61513	6168	RPL37A	RL37A	60S ribosomal protein L37a (Large ribosomal subunit protein eL43)	22	4	88	0.108374	0.0784314	0.029943	0.466521	0	113
4345	Q13425	6645	SNTB2	SNTB2	Beta-2-syntrophin (59 kDa dystrophin-associated protein A1 basic component 2) (Syntrophin-3) (SNT3) (Syntrophin-like) (SNTL)	37	4	88	0.182266	0.0784314	0.103835	1.21654	0	107
5289	Q9UHA4	8649	LAMTOR3	LTOR3	Ragulator complex protein LAMTOR3 (Late endosomal/lysosomal adaptor and MAPK and MTOR activator 3) (MEK-binding partner 1) (Mp1) (Mitogen-activated protein kinase kinase 1-interacting protein 1) (Mitogen-activated protein kinase scaffold protein 1)	20	8	88	0.0985222	0.156863	-0.0583406	-0.670982	0	94
5954	Q5TZA2	9696	CROCC	CROCC	Rootletin (Ciliary rootlet coiled-coil protein)	30	3	88	0.147783	0.0588235	0.0889597	1.32902	0	109
6163	O60784	10043	TOM1	TOM1	Target of Myb protein 1	31	7	88	0.152709	0.137255	0.0154545	0.153931	0	169
6620	O75964	10632	ATP5MG	ATP5L	ATP synthase subunit g, mitochondrial (ATPase subunit g)	13	4	88	0.0640394	0.0784314	-0.014392	-0.292471	0	99
7501	Q13148	23435	TARDBP	TADBP	TAR DNA-binding protein 43 (TDP-43)	23	4	88	0.1133	0.0784314	0.0348691	0.530651	0	119
7931	Q9UBF2	26958	COPG2	COPG2	Coatomer subunit gamma-2 (Gamma-2-coat protein) (Gamma-2-COP)	21	5	88	0.103448	0.0980392	0.00540906	0.0774788	0	235
8216	Q9Y6E2	28969	BZW2	BZW2	Basic leucine zipper and W2 domain-containing protein 2	24	6	88	0.118227	0.117647	0.000579542	0.00708942	0	164
12939	Q5D862	388698	FLG2	FILA2	Filaggrin-2 (FLG-2) (Intermediate filament-associated and psoriasis-susceptibility protein) (Ifapsoriasin)	43	4	88	0.211823	0.0784314	0.133391	1.43335	0	133
129	P01019	183	AGT	ANGT	Angiotensinogen (Serpin A8) [Cleaved into: Angiotensin-1 (Angiotensin 1-10) (Angiotensin I) (Ang I); Angiotensin-2 (Angiotensin 1-8) (Angiotensin II) (Ang II); Angiotensin-3 (Angiotensin 2-8) (Angiotensin III) (Ang III) (Des-Asp[1]-angiotensin II); Angiotensin-4 (Angiotensin 3-8) (Angiotensin IV) (Ang IV); Angiotensin 1-9; Angiotensin 1-7; Angiotensin 1-5; Angiotensin 1-4]	41	11	87	0.20197	0.215686	-0.0137158	-0.0947902	1	505
255	P02652	336	APOA2	APOA2	Apolipoprotein A-II (Apo-AII) (ApoA-II) (Apolipoprotein A2) [Cleaved into: Proapolipoprotein A-II (ProapoA-II); Truncated apolipoprotein A-II (Apolipoprotein A-II(1-76))]	46	8	87	0.226601	0.156863	0.0697382	0.530651	0	90
521	P04003	722	C4BPA	C4BPA	C4b-binding protein alpha chain (C4bp) (Proline-rich protein) (PRP)	39	11	87	0.192118	0.215686	-0.023568	-0.16694	0	342
523	O15484	726	CAPN5	CAN5	Calpain-5 (EC 3.4.22.-) (Calpain htra-3) (New calpain 3) (nCL-3)	48	6	87	0.236453	0.117647	0.118806	1.00709	0	310
625	P49589	833	CARS1	SYCC	Cysteine--tRNA ligase, cytoplasmic (EC 6.1.1.16) (Cysteinyl-tRNA synthetase) (CysRS)	30	7	87	0.147783	0.137255	0.0105283	0.106625	4	126
751	P12830	999	CDH1	CADH1	Cadherin-1 (CAM 120/80) (Epithelial cadherin) (E-cadherin) (Uvomorulin) (CD antigen CD324) [Cleaved into: E-Cad/CTF1; E-Cad/CTF2; E-Cad/CTF3]	36	7	87	0.17734	0.137255	0.040085	0.36966	0	346
845	Q92572	1176	AP3S1	AP3S1	AP-3 complex subunit sigma-1 (AP-3 complex subunit sigma-3A) (Adaptor-related protein complex 3 subunit sigma-1) (Clathrin-associated/assembly/adaptor protein, small 3) (Sigma-3A-adaptin) (Sigma3A-adaptin) (Sigma-adaptin 3a)	17	4	87	0.0837438	0.0784314	0.00531247	0.0945523	0	155
1277	Q16610	1893	ECM1	ECM1	Extracellular matrix protein 1 (Secretory component p85)	37	11	87	0.182266	0.215686	-0.0334203	-0.242889	0	116
1419	P84090	2079	ERH	ERH	Enhancer of rudimentary homolog	21	2	87	0.103448	0.0392157	0.0642326	1.39941	0	99
2932	E9PAV3	4666	NACA	NACAM	Nascent polypeptide-associated complex subunit alpha, muscle-specific form (Alpha-NAC, muscle-specific form) (skNAC)	14	5	87	0.0689655	0.0980392	-0.0290737	-0.507484	0	201
3580	O60256	5636	PRPSAP2	KPRB	Phosphoribosyl pyrophosphate synthase-associated protein 2 (PRPP synthase-associated protein 2) (41 kDa phosphoribosypyrophosphate synthetase-associated protein) (PAP41)	19	5	87	0.0935961	0.0980392	-0.00444316	-0.0669112	35	205
3837	Q16576	5931	RBBP7	RBBP7	Histone-binding protein RBBP7 (Histone acetyltransferase type B subunit 2) (Nucleosome-remodeling factor subunit RBAP46) (Retinoblastoma-binding protein 7) (RBBP-7) (Retinoblastoma-binding protein p46)	32	3	87	0.157635	0.0588235	0.0988119	1.42213	0	159
4339	P62308	6637	SNRPG	RUXG	Small nuclear ribonucleoprotein G (snRNP-G) (Sm protein G) (Sm-G) (SmG)	14	1	87	0.0689655	0.0196078	0.0493577	1.81444	0	116
4857	P61758	7411	VBP1	PFD3	Prefoldin subunit 3 (HIBBJ46) (Von Hippel-Lindau-binding protein 1) (VBP-1) (VHL-binding protein 1)	29	3	87	0.142857	0.0588235	0.0840336	1.28011	0	106
5481	Q9BXS5	8907	AP1M1	AP1M1	AP-1 complex subunit mu-1 (AP-mu chain family member mu1A) (Adaptor protein complex AP-1 subunit mu-1) (Adaptor-related protein complex 1 subunit mu-1) (Clathrin assembly protein complex 1 mu-1 medium chain 1) (Clathrin coat assembly protein AP47) (Clathrin coat-associated protein AP47) (Golgi adaptor HA1/AP1 adaptin mu-1 subunit) (Mu-adaptin 1) (Mu1A-adaptin)	32	9	87	0.157635	0.176471	-0.0188351	-0.162836	0	223
5936	O60841	9669	EIF5B	IF2P	Eukaryotic translation initiation factor 5B (eIF-5B) (EC 3.6.5.3) (Translation initiation factor IF-2)	29	7	87	0.142857	0.137255	0.00560224	0.0577155	20	125
6523	O00567	10528	NOP56	NOP56	Nucleolar protein 56 (Nucleolar protein 5A)	23	5	87	0.1133	0.0980392	0.0152613	0.208723	0	124
8494	Q9Y3A5	51119	SBDS	SBDS	Ribosome maturation protein SBDS (Shwachman-Bodian-Diamond syndrome protein)	25	6	87	0.123153	0.117647	0.00550565	0.0659831	0	99
450	P00751	629	CFB	CFAB	Complement factor B (EC 3.4.21.47) (C3/C5 convertase) (Glycine-rich beta glycoprotein) (GBG) (PBF2) (Properdin factor B) [Cleaved into: Complement factor B Ba fragment; Complement factor B Bb fragment]	35	6	86	0.172414	0.117647	0.0547667	0.55141	7	514
509	P02747	714	C1QC	C1QC	Complement C1q subcomponent subunit C	40	12	86	0.197044	0.235294	-0.0382498	-0.255945	0	110
842	P61966	1174	AP1S1	AP1S1	AP-1 complex subunit sigma-1A (Adaptor protein complex AP-1 subunit sigma-1A) (Adaptor-related protein complex 1 subunit sigma-1A) (Clathrin assembly protein complex 1 sigma-1A small chain) (Clathrin coat assembly protein AP19) (Golgi adaptor HA1/AP1 adaptin sigma-1A subunit) (HA1 19 kDa subunit) (Sigma 1a subunit of AP-1 clathrin) (Sigma-adaptin 1A) (Sigma1A-adaptin)	23	5	86	0.1133	0.0980392	0.0152613	0.208723	0	155
843	P53680	1175	AP2S1	AP2S1	AP-2 complex subunit sigma (Adaptor protein complex AP-2 subunit sigma) (Adaptor-related protein complex 2 subunit sigma) (Clathrin assembly protein 2 sigma small chain) (Clathrin coat assembly protein AP17) (Clathrin coat-associated protein AP17) (HA2 17 kDa subunit) (Plasma membrane adaptor AP-2 17 kDa protein) (Sigma2-adaptin)	18	5	86	0.08867	0.0980392	-0.00936926	-0.144914	0	155
1001	P41240	1445	CSK	CSK	Tyrosine-protein kinase CSK (EC 2.7.10.2) (C-Src kinase) (Protein-tyrosine kinase CYL)	29	8	86	0.142857	0.156863	-0.0140056	-0.13493	10	419
1614	P10253	2548	GAA	LYAG	Lysosomal alpha-glucosidase (EC 3.2.1.20) (Acid maltase) (Aglucosidase alfa) [Cleaved into: 76 kDa lysosomal alpha-glucosidase; 70 kDa lysosomal alpha-glucosidase]	38	5	86	0.187192	0.0980392	0.0891529	0.933089	4	323
2768	P14209	4267	CD99	CD99	CD99 antigen (12E7) (E2 antigen) (Protein MIC2) (T-cell surface glycoprotein E2) (CD antigen CD99)	28	9	86	0.137931	0.176471	-0.0385396	-0.355481	0	88
3361	P00749	5328	PLAU	UROK	Urokinase-type plasminogen activator (U-plasminogen activator) (uPA) (EC 3.4.21.73) [Cleaved into: Urokinase-type plasminogen activator long chain A; Urokinase-type plasminogen activator short chain A; Urokinase-type plasminogen activator chain B]	32	3	86	0.157635	0.0588235	0.0988119	1.42213	7	514
4052	Q9P2E9	6238	RRBP1	RRBP1	Ribosome-binding protein 1 (180 kDa ribosome receptor homolog) (RRp) (ES/130-related protein) (Ribosome receptor protein)	25	7	86	0.123153	0.137255	-0.0141022	-0.156409	0	177
4325	P08621	6625	SNRNP70	RU17	U1 small nuclear ribonucleoprotein 70 kDa (U1 snRNP 70 kDa) (U1-70K) (snRNP70)	28	3	86	0.137931	0.0588235	0.0791075	1.22948	2	346
5379	Q99747	8774	NAPG	SNAG	Gamma-soluble NSF attachment protein (SNAP-gamma) (N-ethylmaleimide-sensitive factor attachment protein gamma)	31	5	86	0.152709	0.0980392	0.0546701	0.639358	0	116
7587	Q9Y2V2	23589	CARHSP1	CHSP1	Calcium-regulated heat-stable protein 1 (Calcium-regulated heat-stable protein of 24 kDa) (CRHSP-24)	23	2	86	0.1133	0.0392157	0.0740848	1.53065	12	242
7795	Q3LXA3	26007	TKFC	TKFC	Triokinase/FMN cyclase (Bifunctional ATP-dependent dihydroxyacetone kinase/FAD-AMP lyase (cyclizing)) [Includes: ATP-dependent dihydroxyacetone kinase (DHA kinase) (EC 2.7.1.28) (EC 2.7.1.29) (Glycerone kinase) (Triokinase) (Triose kinase); FAD-AMP lyase (cyclizing) (EC 4.6.1.15) (FAD-AMP lyase (cyclic FMN forming)) (FMN cyclase)]	42	10	86	0.206897	0.196078	0.0108181	0.0774788	7	101
7944	Q96F07	26999	CYFIP2	CYFP2	Cytoplasmic FMR1-interacting protein 2 (p53-inducible protein 121)	35	6	86	0.172414	0.117647	0.0547667	0.55141	0	283
9162	Q53EZ4	55165	CEP55	CEP55	Centrosomal protein of 55 kDa (Cep55) (Up-regulated in colon cancer 6)	31	0	86	0.152709	0	0.152709	#DIV/0!	0	106
9203	A0AVT1	55236	UBA6	UBA6	Ubiquitin-like modifier-activating enzyme 6 (Ubiquitin-activating enzyme 6) (EC 6.2.1.45) (Monocyte protein 4) (MOP-4) (Ubiquitin-activating enzyme E1-like protein 2) (E1-L2)	31	6	86	0.152709	0.117647	0.0350623	0.376323	0	375
9422	Q9NV96	55754	TMEM30A	CC50A	Cell cycle control protein 50A (P4-ATPase flippase complex beta subunit TMEM30A) (Transmembrane protein 30A)	32	3	86	0.157635	0.0588235	0.0988119	1.42213	0	110
10221	Q6PCB0	64856	VWA1	VWA1	von Willebrand factor A domain-containing protein 1	19	3	86	0.0935961	0.0588235	0.0347725	0.670054	0	292
10226	Q9H5V8	64866	CDCP1	CDCP1	CUB domain-containing protein 1 (Membrane glycoprotein gp140) (Subtractive immunization M plus HEp3-associated 135 kDa protein) (SIMA135) (Transmembrane and associated with src kinases) (CD antigen CD318)	31	1	86	0.152709	0.0196078	0.133102	2.96129	0	95
401	P21283	528	ATP6V1C1	VATC1	V-type proton ATPase subunit C 1 (V-ATPase subunit C 1) (Vacuolar proton pump subunit C 1)	26	6	85	0.128079	0.117647	0.0104318	0.122567	0	116
950	O15551	1365	CLDN3	CLD3	Claudin-3 (Clostridium perfringens enterotoxin receptor 2) (CPE-R 2) (CPE-receptor 2) (Rat ventral prostate.1 protein homolog) (hRVP1)	20	7	85	0.0985222	0.137255	-0.0387327	-0.478337	0	125
1049	P26232	1496	CTNNA2	CTNA2	Catenin alpha-2 (Alpha N-catenin) (Alpha-catenin-related protein)	24	5	85	0.118227	0.0980392	0.0201874	0.270124	0	387
1657	Q04446	2632	GBE1	GLGB	1,4-alpha-glucan-branching enzyme (EC 2.4.1.18) (Brancher enzyme) (Glycogen-branching enzyme)	34	7	85	0.167488	0.137255	0.0302328	0.287197	3	109
2349	P13612	3676	ITGA4	ITA4	Integrin alpha-4 (CD49 antigen-like family member D) (Integrin alpha-IV) (VLA-4 subunit alpha) (CD antigen CD49d)	36	6	85	0.17734	0.117647	0.0596928	0.592052	0	103
3605	P49768	5663	PSEN1	PSN1	Presenilin-1 (PS-1) (EC 3.4.23.-) (Protein S182) [Cleaved into: Presenilin-1 NTF subunit; Presenilin-1 CTF subunit; Presenilin-1 CTF12 (PS1-CTF12)]	26	4	85	0.128079	0.0784314	0.0496474	0.707529	0	115
3905	Q13464	6093	ROCK1	ROCK1	Rho-associated protein kinase 1 (EC 2.7.11.1) (Renal carcinoma antigen NY-REN-35) (Rho-associated, coiled-coil-containing protein kinase 1) (Rho-associated, coiled-coil-containing protein kinase I) (ROCK-I) (p160 ROCK-1) (p160ROCK)	35	8	85	0.172414	0.156863	0.015551	0.136372	0	191
4560	P63172	6993	DYNLT1	DYLT1	Dynein light chain Tctex-type 1 (Protein CW-1) (T-complex testis-specific protein 1 homolog)	18	3	85	0.08867	0.0588235	0.0298464	0.592052	0	105
6584	O43598	10591	DNPH1	DNPH1	2'-deoxynucleoside 5'-phosphate N-hydrolase 1 (EC 3.2.2.-) (c-Myc-responsive protein RCL)	29	4	85	0.142857	0.0784314	0.0644258	0.86507	0	95
6886	Q16186	11047	ADRM1	ADRM1	Proteasomal ubiquitin receptor ADRM1 (110 kDa cell membrane glycoprotein) (Gp110) (Adhesion-regulating molecule 1) (ARM-1) (Proteasome regulatory particle non-ATPase 13) (hRpn13) (Rpn13 homolog)	21	8	85	0.103448	0.156863	-0.0534145	-0.600593	0	91
8433	Q9Y3D6	51024	FIS1	FIS1	Mitochondrial fission 1 protein (FIS1 homolog) (hFis1) (Tetratricopeptide repeat protein 11) (TPR repeat protein 11)	15	5	85	0.0738916	0.0980392	-0.0241476	-0.407948	0	104
9893	Q8TF72	57619	SHROOM3	SHRM3	Protein Shroom3 (Shroom-related protein) (hShrmL)	16	1	85	0.0788177	0.0196078	0.0592099	2.00709	0	97
10617	Q9BXJ9	80155	NAA15	NAA15	N-alpha-acetyltransferase 15, NatA auxiliary subunit (Gastric cancer antigen Ga19) (N-terminal acetyltransferase) (NMDA receptor-regulated protein 1) (Protein tubedown-1) (Tbdn100)	32	3	85	0.157635	0.0588235	0.0988119	1.42213	0	119
12691	P48668	286887	KRT6C	K2C6C	Keratin, type II cytoskeletal 6C (Cytokeratin-6C) (CK-6C) (Cytokeratin-6E) (CK-6E) (Keratin K6h) (Keratin-6C) (K6C) (Type-II keratin Kb12)	37	4	85	0.182266	0.0784314	0.103835	1.21654	0	437
12838	Q9Y2Q3	373156	GSTK1	GSTK1	Glutathione S-transferase kappa 1 (EC 2.5.1.18) (GST 13-13) (GST class-kappa) (GSTK1-1) (hGSTK1) (Glutathione S-transferase subunit 13)	13	8	85	0.0640394	0.156863	-0.0928233	-1.29247	0	105
14	Q8NE71	23	ABCF1	ABCF1	ATP-binding cassette sub-family F member 1 (ATP-binding cassette 50) (TNF-alpha-stimulated ABC protein)	29	5	84	0.142857	0.0980392	0.0448179	0.543142	19	123
156	P05091	217	ALDH2	ALDH2	Aldehyde dehydrogenase, mitochondrial (EC 1.2.1.3) (ALDH class 2) (ALDH-E2) (ALDHI)	24	12	84	0.118227	0.235294	-0.117068	-0.992911	54	361
768	Q00535	1020	CDK5	CDK5	Cyclin-dependent-like kinase 5 (EC 2.7.11.1) (Cell division protein kinase 5) (Serine/threonine-protein kinase PSSALRE) (Tau protein kinase II catalytic subunit) (TPKII catalytic subunit)	28	5	84	0.137931	0.0980392	0.0398918	0.492516	0	189
1244	Q08554	1823	DSC1	DSC1	Desmocollin-1 (Cadherin family member 1) (Desmosomal glycoprotein 2/3) (DG2/DG3)	32	6	84	0.157635	0.117647	0.0399884	0.422127	0	346
1454	P00742	2159	F10	FA10	Coagulation factor X (EC 3.4.21.6) (Stuart factor) (Stuart-Prower factor) [Cleaved into: Factor X light chain; Factor X heavy chain; Activated factor Xa heavy chain]	53	10	84	0.261084	0.196078	0.0650053	0.413082	7	514
2225	Q13907	3422	IDI1	IDI1	Isopentenyl-diphosphate Delta-isomerase 1 (EC 5.3.3.2) (Isopentenyl pyrophosphate isomerase 1) (IPP isomerase 1) (IPPI1)	21	8	84	0.103448	0.156863	-0.0534145	-0.600593	0	97
2715	P33993	4176	MCM7	MCM7	DNA replication licensing factor MCM7 (EC 3.6.4.12) (CDC47 homolog) (P1.1-MCM3)	24	4	84	0.118227	0.0784314	0.0397952	0.592052	0	181
3263	Q9NQP4	5203	PFDN4	PFD4	Prefoldin subunit 4 (Protein C-1)	20	3	84	0.0985222	0.0588235	0.0396986	0.744055	0	105
3491	Q08209	5530	PPP3CA	PP2BA	Serine/threonine-protein phosphatase 2B catalytic subunit alpha isoform (EC 3.1.3.16) (CAM-PRP catalytic subunit) (Calmodulin-dependent calcineurin A subunit alpha isoform)	29	8	84	0.142857	0.156863	-0.0140056	-0.13493	1	271
3568	P19525	5610	EIF2AK2	E2AK2	Interferon-induced, double-stranded RNA-activated protein kinase (EC 2.7.11.1) (Eukaryotic translation initiation factor 2-alpha kinase 2) (eIF-2A protein kinase 2) (Interferon-inducible RNA-dependent protein kinase) (P1/eIF-2A protein kinase) (Protein kinase RNA-activated) (PKR) (Protein kinase R) (Tyrosine-protein kinase EIF2AK2) (EC 2.7.10.2) (p68 kinase)	20	2	84	0.0985222	0.0392157	0.0593065	1.32902	0	97
3709	P18433	5786	PTPRA	PTPRA	Receptor-type tyrosine-protein phosphatase alpha (Protein-tyrosine phosphatase alpha) (R-PTP-alpha) (EC 3.1.3.48)	33	4	84	0.162562	0.0784314	0.0841302	1.05148	0	344
4476	P61764	6812	STXBP1	STXB1	Syntaxin-binding protein 1 (MUNC18-1) (N-Sec1) (Protein unc-18 homolog 1) (Unc18-1) (Protein unc-18 homolog A) (Unc-18A) (p67)	40	7	84	0.197044	0.137255	0.0597894	0.521663	0	293
4620	P04216	7070	THY1	THY1	Thy-1 membrane glycoprotein (CDw90) (Thy-1 antigen) (CD antigen CD90)	49	4	84	0.241379	0.0784314	0.162948	1.6218	0	114
6487	Q15437	10483	SEC23B	SC23B	Protein transport protein Sec23B (SEC23-related protein B)	24	6	84	0.118227	0.117647	0.000579542	0.00708942	0	181
8039	Q92485	27293	SMPDL3B	ASM3B	Acid sphingomyelinase-like phosphodiesterase 3b (ASM-like phosphodiesterase 3b) (EC 3.1.4.-)	38	3	84	0.187192	0.0588235	0.128369	1.67005	0	108
8208	Q9Y2Q5	28956	LAMTOR2	LTOR2	Ragulator complex protein LAMTOR2 (Endosomal adaptor protein p14) (Late endosomal/lysosomal Mp1-interacting protein) (Late endosomal/lysosomal adaptor and MAPK and MTOR activator 2) (Mitogen-activated protein-binding protein-interacting protein) (MAPBP-interacting protein) (Roadblock domain-containing protein 3)	16	3	84	0.0788177	0.0588235	0.0199942	0.422127	0	95
10276	Q53H96	65263	PYCR3	P5CR3	Pyrroline-5-carboxylate reductase 3 (P5C reductase 3) (P5CR 3) (EC 1.5.1.2) (Pyrroline-5-carboxylate reductase-like protein)	21	7	84	0.103448	0.137255	-0.0338066	-0.407948	13	132
11253	Q9H7P6	89853	MVB12B	MB12B	Multivesicular body subunit 12B (ESCRT-I complex subunit MVB12B) (Protein FAM125B)	38	3	84	0.187192	0.0588235	0.128369	1.67005	0	196
12980	Q92614	399687	MYO18A	MY18A	Unconventional myosin-XVIIIa (Molecule associated with JAK3 N-terminus) (MAJN) (Myosin containing a PDZ domain) (Surfactant protein receptor SP-R210) (SP-R210)	22	8	84	0.108374	0.156863	-0.0484884	-0.533479	0	508
386	P36542	509	ATP5F1C	ATPG	ATP synthase subunit gamma, mitochondrial (F-ATPase gamma subunit)	14	8	83	0.0689655	0.156863	-0.0878972	-1.18556	25	106
497	P20290	689	BTF3	BTF3	Transcription factor BTF3 (Nascent polypeptide-associated complex subunit beta) (NAC-beta) (RNA polymerase B transcription factor 3)	16	7	83	0.0788177	0.137255	-0.0584372	-0.800265	0	90
1127	P12821	1636	ACE	ACE	Angiotensin-converting enzyme (ACE) (EC 3.2.1.-) (EC 3.4.15.1) (Dipeptidyl carboxypeptidase I) (Kininase II) (CD antigen CD143) [Cleaved into: Angiotensin-converting enzyme, soluble form]	43	5	83	0.211823	0.0980392	0.113783	1.11143	2	102
1652	P04062	2629	GBA	GLCM	Glucosylceramidase (EC 3.2.1.45) (Acid beta-glucosidase) (Alglucerase) (Beta-glucocerebrosidase) (Beta-GC) (D-glucosyl-N-acylsphingosine glucohydrolase) (Imiglucerase)	23	6	83	0.1133	0.117647	-0.00434657	-0.0543111	1	113
1993	P30443	3105	#N/A	1A01	HLA class I histocompatibility antigen, A-1 alpha chain (MHC class I antigen A*1)	35	12	83	0.172414	0.235294	-0.0628803	-0.44859	0	372
2015	P01889	3106	HLA-B	1B07	HLA class I histocompatibility antigen, B-7 alpha chain (MHC class I antigen B*7)	29	10	83	0.142857	0.196078	-0.0532213	-0.456858	0	372
2190	O75054	3321	IGSF3	IGSF3	Immunoglobulin superfamily member 3 (IgSF3) (Glu-Trp-Ile EWI motif-containing protein 3) (EWI-3)	33	4	83	0.162562	0.0784314	0.0841302	1.05148	0	116
3431	P52434	5437	POLR2H	RPAB3	DNA-directed RNA polymerases I, II, and III subunit RPABC3 (RNA polymerases I, II, and III subunit ABC3) (DNA-directed RNA polymerase II subunit H) (DNA-directed RNA polymerases I, II, and III 17.1 kDa polypeptide) (RPB17) (RPB8 homolog) (hRPB8)	18	3	83	0.08867	0.0588235	0.0298464	0.592052	0	99
3498	O00743	5537	PPP6C	PPP6	Serine/threonine-protein phosphatase 6 catalytic subunit (PP6C) (EC 3.1.3.16) [Cleaved into: Serine/threonine-protein phosphatase 6 catalytic subunit, N-terminally processed]	24	6	83	0.118227	0.117647	0.000579542	0.00708942	0	87
4838	P31930	7384	UQCRC1	QCR1	Cytochrome b-c1 complex subunit 1, mitochondrial (Complex III subunit 1) (Core protein I) (Ubiquinol-cytochrome-c reductase complex core protein 1)	22	11	83	0.108374	0.215686	-0.107312	-0.992911	35	167
5013	P46379	7917	BAG6	BAG6	Large proline-rich protein BAG6 (BAG family molecular chaperone regulator 6) (BCL2-associated athanogene 6) (BAG-6) (HLA-B-associated transcript 3) (Protein G3) (Protein Scythe)	21	5	83	0.103448	0.0980392	0.00540906	0.0774788	0	103
5084	Q14683	8243	SMC1A	SMC1A	Structural maintenance of chromosomes protein 1A (SMC protein 1A) (SMC-1-alpha) (SMC-1A) (Sb1.8)	20	5	83	0.0985222	0.0980392	0.000482952	0.00708942	2	175
5109	P04908	8335	H2AC4	H2A1B	Histone H2A type 1-B/E (Histone H2A.2) (Histone H2A/a) (Histone H2A/m)	39	12	83	0.192118	0.235294	-0.0431759	-0.292471	0	452
5157	Q13620	8450	CUL4B	CUL4B	Cullin-4B (CUL-4B)	22	6	83	0.108374	0.117647	-0.00927267	-0.118441	0	181
6370	O43813	10314	LANCL1	LANC1	LanC-like protein 1 (40 kDa erythrocyte membrane protein) (p40)	28	5	83	0.137931	0.0980392	0.0398918	0.492516	0	126
7115	O94985	22883	CLSTN1	CSTN1	Calsyntenin-1 (Alcadein-alpha) (Alc-alpha) (Alzheimer-related cadherin-like protein) (Non-classical cadherin XB31alpha) [Cleaved into: Soluble Alc-alpha (SAlc-alpha); CTF1-alpha (C-terminal fragment 1-alpha)]	19	7	83	0.0935961	0.137255	-0.0436588	-0.552338	0	102
7309	Q14699	23180	RFTN1	RFTN1	Raftlin (Cell migration-inducing gene 2 protein) (Raft-linking protein)	35	5	83	0.172414	0.0980392	0.0743746	0.814444	0	90
7370	Q8WVM8	23256	SCFD1	SCFD1	Sec1 family domain-containing protein 1 (SLY1 homolog) (Sly1p) (Syntaxin-binding protein 1-like 2)	20	6	83	0.0985222	0.117647	-0.0191249	-0.255945	0	293
8751	Q9NZW5	51678	MPP6	MPP6	MAGUK p55 subfamily member 6 (Veli-associated MAGUK 1) (VAM-1)	30	4	83	0.147783	0.0784314	0.0693519	0.91398	1	235
10896	Q9BZG1	83871	RAB34	RAB34	Ras-related protein Rab-34 (Ras-related protein Rab-39) (Ras-related protein Rah)	29	4	83	0.142857	0.0784314	0.0644258	0.86507	0	265
11412	Q6XQN6	93100	NAPRT	PNCB	Nicotinate phosphoribosyltransferase (NAPRTase) (EC 6.3.4.21) (FHA-HIT-interacting protein) (Nicotinate phosphoribosyltransferase domain-containing protein 1)	25	7	83	0.123153	0.137255	-0.0141022	-0.156409	6	225
12404	Q96FN4	221184	CPNE2	CPNE2	Copine-2 (Copine II)	28	2	83	0.137931	0.0392157	0.0987153	1.81444	0	328
321	P36404	402	ARL2	ARL2	ADP-ribosylation factor-like protein 2	21	2	82	0.103448	0.0392157	0.0642326	1.39941	0	111
528	P10643	730	C7	CO7	Complement component C7	46	7	82	0.226601	0.137255	0.0893461	0.723296	0	120
985	P02511	1410	CRYAB	CRYAB	Alpha-crystallin B chain (Alpha(B)-crystallin) (Heat shock protein beta-5) (HspB5) (Renal carcinoma antigen NY-REN-27) (Rosenthal fiber component)	38	5	82	0.187192	0.0980392	0.0891529	0.933089	0	336
1157	Q16698	1666	DECR1	DECR	2,4-dienoyl-CoA reductase, mitochondrial (EC 1.3.1.34) (2,4-dienoyl-CoA reductase [NADPH]) (4-enoyl-CoA reductase [NADPH]) (Short chain dehydrogenase/reductase family 18C member 1)	16	9	82	0.0788177	0.176471	-0.0976529	-1.16284	9	300
2123	P55795	3188	HNRNPH2	HNRH2	Heterogeneous nuclear ribonucleoprotein H2 (hnRNP H2) (FTP-3) (Heterogeneous nuclear ribonucleoprotein H') (hnRNP H') [Cleaved into: Heterogeneous nuclear ribonucleoprotein H2, N-terminally processed]	23	2	82	0.1133	0.0392157	0.0740848	1.53065	0	246
2345	P56199	3672	ITGA1	ITA1	Integrin alpha-1 (CD49 antigen-like family member A) (Laminin and collagen receptor) (VLA-1) (CD antigen CD49a)	34	7	82	0.167488	0.137255	0.0302328	0.287197	0	99
2347	P08514	3674	ITGA2B	ITA2B	Integrin alpha-IIb (GPalpha IIb) (GPIIb) (Platelet membrane glycoprotein IIb) (CD antigen CD41) [Cleaved into: Integrin alpha-IIb heavy chain; Integrin alpha-IIb light chain, form 1; Integrin alpha-IIb light chain, form 2]	44	6	82	0.216749	0.117647	0.0991017	0.881559	0	301
2652	Q14444	4076	CAPRIN1	CAPR1	Caprin-1 (Cell cycle-associated protein 1) (Cytoplasmic activation- and proliferation-associated protein 1) (GPI-anchored membrane protein 1) (GPI-anchored protein p137) (GPI-p137) (p137GPI) (Membrane component chromosome 11 surface marker 1) (RNA granule protein 105)	23	4	82	0.1133	0.0784314	0.0348691	0.530651	0	102
2714	Q14566	4175	MCM6	MCM6	DNA replication licensing factor MCM6 (EC 3.6.4.12) (p105MCM)	29	5	82	0.142857	0.0980392	0.0448179	0.543142	0	181
3064	O15118	4864	NPC1	NPC1	Niemann-Pick C1 protein	33	3	82	0.162562	0.0588235	0.103738	1.46652	0	113
3260	O60925	5201	PFDN1	PFD1	Prefoldin subunit 1	25	2	82	0.123153	0.0392157	0.083937	1.65095	0	94
3385	O00469	5352	PLOD2	PLOD2	Procollagen-lysine,2-oxoglutarate 5-dioxygenase 2 (EC 1.14.11.4) (Lysyl hydroxylase 2) (LH2)	30	7	82	0.147783	0.137255	0.0105283	0.106625	0	231
3849	Q15293	5954	RCN1	RCN1	Reticulocalbin-1	20	11	82	0.0985222	0.215686	-0.117164	-1.13041	0	132
4426	P10155	6738	RO60	RO60	60 kDa SS-A/Ro ribonucleoprotein (60 kDa Ro protein) (60 kDa ribonucleoprotein Ro) (RoRNP) (Ro 60 kDa autoantigen) (Sjoegren syndrome antigen A2) (Sjoegren syndrome type A antigen) (SS-A) (TROVE domain family member 2)	27	6	82	0.133005	0.117647	0.0153579	0.177014	0	105
4976	Q15942	7791	ZYX	ZYX	Zyxin (Zyxin-2)	28	8	82	0.137931	0.156863	-0.0189317	-0.185556	0	142
5163	Q13616	8454	CUL1	CUL1	Cullin-1 (CUL-1)	31	8	82	0.152709	0.156863	-0.00415339	-0.0387143	0	181
5459	Q9Y289	8884	SLC5A6	SC5A6	Sodium-dependent multivitamin transporter (Na(+)-dependent multivitamin transporter) (Solute carrier family 5 member 6)	30	5	82	0.147783	0.0980392	0.049744	0.592052	7	113
5506	O14617	8943	AP3D1	AP3D1	AP-3 complex subunit delta-1 (AP-3 complex subunit delta) (Adaptor-related protein complex 3 subunit delta-1) (Delta-adaptin)	30	7	82	0.147783	0.137255	0.0105283	0.106625	0	104
6782	Q9Y2Z0	10910	SUGT1	SGT1	Protein SGT1 homolog (Protein 40-6-3) (Sgt1) (Suppressor of G2 allele of SKP1 homolog)	20	7	82	0.0985222	0.137255	-0.0387327	-0.478337	0	95
7630	Q9P0V3	23677	SH3BP4	SH3B4	SH3 domain-binding protein 4 (EH-binding protein 10) (Transferrin receptor-trafficking protein)	31	4	82	0.152709	0.0784314	0.074278	0.961286	0	95
8370	O14907	30851	TAX1BP3	TX1B3	Tax1-binding protein 3 (Glutaminase-interacting protein 3) (Tax interaction protein 1) (TIP-1) (Tax-interacting protein 1)	27	2	82	0.133005	0.0392157	0.0937892	1.76198	0	94
9371	Q8TAT6	55666	NPLOC4	NPL4	Nuclear protein localization protein 4 homolog (Protein NPL4)	17	4	82	0.0837438	0.0784314	0.00531247	0.0945523	0	96
10011	Q9HB40	59342	SCPEP1	RISC	Retinoid-inducible serine carboxypeptidase (EC 3.4.16.-) (Serine carboxypeptidase 1)	29	3	82	0.142857	0.0588235	0.0840336	1.28011	0	187
11575	Q96CX2	115207	KCTD12	KCD12	BTB/POZ domain-containing protein KCTD12 (Pfetin) (Predominantly fetal expressed T1 domain)	39	7	82	0.192118	0.137255	0.0548633	0.485137	0	102
55	P62736	59	ACTA2	ACTA	Actin, aortic smooth muscle (Alpha-actin-2) (Cell growth-inhibiting gene 46 protein)	26	11	81	0.128079	0.215686	-0.0876075	-0.751902	0	592
881	Q15417	1266	CNN3	CNN3	Calponin-3 (Calponin, acidic isoform)	28	2	81	0.137931	0.0392157	0.0987153	1.81444	0	355
1470	P16930	2184	FAH	FAAA	Fumarylacetoacetase (FAA) (EC 3.7.1.2) (Beta-diketonase) (Fumarylacetoacetate hydrolase)	27	7	81	0.133005	0.137255	-0.00424998	-0.045378	8	121
2065	P10321	3107	HLA-C	1C07	HLA class I histocompatibility antigen, Cw-7 alpha chain (MHC class I antigen Cw*7)	28	3	81	0.137931	0.0588235	0.0791075	1.22948	0	372
3705	Q06124	5781	PTPN11	PTN11	Tyrosine-protein phosphatase non-receptor type 11 (EC 3.1.3.48) (Protein-tyrosine phosphatase 1D) (PTP-1D) (Protein-tyrosine phosphatase 2C) (PTP-2C) (SH-PTP2) (SHP-2) (Shp2) (SH-PTP3)	40	7	81	0.197044	0.137255	0.0597894	0.521663	0	344
3780	P51159	5873	RAB27A	RB27A	Ras-related protein Rab-27A (Rab-27) (GTP-binding protein Ram)	34	4	81	0.167488	0.0784314	0.0890563	1.09455	0	152
4171	Q13247	6431	SRSF6	SRSF6	Serine/arginine-rich splicing factor 6 (Pre-mRNA-splicing factor SRP55) (Splicing factor, arginine/serine-rich 6)	23	5	81	0.1133	0.0980392	0.0152613	0.208723	2	346
4499	P51809	6845	VAMP7	VAMP7	Vesicle-associated membrane protein 7 (VAMP-7) (Synaptobrevin-like protein 1) (Tetanus-insensitive VAMP) (Ti-VAMP)	33	5	81	0.162562	0.0980392	0.0645224	0.729555	0	297
5002	Q93009	7874	USP7	UBP7	Ubiquitin carboxyl-terminal hydrolase 7 (EC 3.4.19.12) (Deubiquitinating enzyme 7) (Herpesvirus-associated ubiquitin-specific protease) (Ubiquitin thioesterase 7) (Ubiquitin-specific-processing protease 7)	31	4	81	0.152709	0.0784314	0.074278	0.961286	0	197
5137	Q15075	8411	EEA1	EEA1	Early endosome antigen 1 (Endosome-associated protein p162) (Zinc finger FYVE domain-containing protein 2)	22	5	81	0.108374	0.0980392	0.0103352	0.144593	0	90
6100	Q15058	9928	KIF14	KIF14	Kinesin-like protein KIF14	11	5	81	0.0541872	0.0980392	-0.043852	-0.855407	0	351
6844	Q13637	10981	RAB32	RAB32	Ras-related protein Rab-32	31	7	81	0.152709	0.137255	0.0154545	0.153931	0	116
7305	Q92599	23176	SEPTIN8	SEPT8	Septin-8	26	2	81	0.128079	0.0392157	0.0888631	1.70753	0	317
7989	Q9Y5X3	27131	SNX5	SNX5	Sorting nexin-5	36	4	81	0.17734	0.0784314	0.0989085	1.17701	0	164
8731	Q9Y3B4	51639	SF3B6	SF3B6	Splicing factor 3B subunit 6 (Pre-mRNA branch site protein p14) (SF3b 14 kDa subunit) (SF3B14a) (Spliceosome-associated protein, 14-kDa) (Splicing factor 3b, subunit 6, 14kDa)	11	2	81	0.0541872	0.0392157	0.0149715	0.466521	0	97
9499	Q9H3U1	55898	UNC45A	UN45A	Protein unc-45 homolog A (Unc-45A) (GCUNC-45) (Smooth muscle cell-associated protein 1) (SMAP-1)	34	3	81	0.167488	0.0588235	0.108664	1.50959	0	93
9845	Q7L7X3	57551	TAOK1	TAOK1	Serine/threonine-protein kinase TAO1 (EC 2.7.11.1) (Kinase from chicken homolog B) (hKFC-B) (MARK Kinase) (MARKK) (Prostate-derived sterile 20-like kinase 2) (PSK-2) (PSK2) (Prostate-derived STE20-like kinase 2) (Thousand and one amino acid protein kinase 1) (TAOK1) (hTAOK1)	39	3	81	0.192118	0.0588235	0.133295	1.70753	0	135
9959	Q9Y333	57819	LSM2	LSM2	U6 snRNA-associated Sm-like protein LSm2 (Protein G7b) (Small nuclear ribonuclear protein D homolog) (snRNP core Sm-like protein Sm-x5)	14	2	81	0.0689655	0.0392157	0.0297498	0.814444	0	249
10830	Q8IYT4	83473	KATNAL2	KATL2	Katanin p60 ATPase-containing subunit A-like 2 (Katanin p60 subunit A-like 2) (EC 3.6.4.3) (p60 katanin-like 2)	10	2	81	0.0492611	0.0392157	0.0100454	0.329018	0	93
11775	Q96BM9	127829	ARL8A	ARL8A	ADP-ribosylation factor-like protein 8A (ADP-ribosylation factor-like protein 10B) (Novel small G protein indispensable for equal chromosome segregation 2)	25	5	81	0.123153	0.0980392	0.0251135	0.329018	0	180
1034	P01040	1475	CSTA	CYTA	Cystatin-A (Cystatin-AS) (Stefin-A) [Cleaved into: Cystatin-A, N-terminally processed]	22	4	80	0.108374	0.0784314	0.029943	0.466521	0	230
1215	O43237	1783	DYNC1LI2	DC1L2	Cytoplasmic dynein 1 light intermediate chain 2 (Dynein light intermediate chain 2, cytosolic) (LIC-2) (LIC53/55)	30	2	80	0.147783	0.0392157	0.108568	1.91398	0	166
1487	P35555	2200	FBN1	FBN1	Fibrillin-1 [Cleaved into: Asprosin]	22	6	80	0.108374	0.117647	-0.00927267	-0.118441	0	140
1716	P17900	2760	GM2A	SAP3	Ganglioside GM2 activator (Cerebroside sulfate activator protein) (GM2-AP) (Sphingolipid activator protein 3) (SAP-3) [Cleaved into: Ganglioside GM2 activator isoform short]	25	3	80	0.123153	0.0588235	0.0643292	1.06598	0	90
2256	O00622	3491	CCN1	CYR61	Protein CYR61 (CCN family member 1) (Cysteine-rich angiogenic inducer 61) (Insulin-like growth factor-binding protein 10) (IBP-10) (IGF-binding protein 10) (IGFBP-10) (Protein GIG1)	25	6	80	0.123153	0.117647	0.00550565	0.0659831	0	97
2264	P01860	3502	#N/A	IGHG3	Immunoglobulin heavy constant gamma 3 (HDC) (Heavy chain disease protein) (Ig gamma-3 chain C region)	35	9	80	0.172414	0.176471	-0.0040568	-0.0335526	0	82
3181	P61457	5092	PCBD1	PHS	Pterin-4-alpha-carbinolamine dehydratase (PHS) (EC 4.2.1.96) (4-alpha-hydroxy-tetrahydropterin dehydratase) (Dimerization cofactor of hepatocyte nuclear factor 1-alpha) (DCoH) (Dimerization cofactor of HNF1) (Phenylalanine hydroxylase-stimulating protein) (Pterin carbinolamine dehydratase) (PCD)	23	5	80	0.1133	0.0980392	0.0152613	0.208723	2	92
3525	P54619	5571	PRKAG1	AAKG1	5'-AMP-activated protein kinase subunit gamma-1 (AMPK gamma1) (AMPK subunit gamma-1) (AMPKg)	26	4	80	0.128079	0.0784314	0.0496474	0.707529	31	230
3590	P48740	5648	MASP1	MASP1	Mannan-binding lectin serine protease 1 (EC 3.4.21.-) (Complement factor MASP-3) (Complement-activating component of Ra-reactive factor) (Mannose-binding lectin-associated serine protease 1) (MASP-1) (Mannose-binding protein-associated serine protease) (Ra-reactive factor serine protease p100) (RaRF) (Serine protease 5) [Cleaved into: Mannan-binding lectin serine protease 1 heavy chain; Mannan-bi…	40	9	80	0.197044	0.176471	0.0205737	0.159093	7	514
3765	P20337	5865	RAB3B	RAB3B	Ras-related protein Rab-3B	35	4	80	0.172414	0.0784314	0.0939824	1.13637	0	170
4497	P63027	6844	VAMP2	VAMP2	Vesicle-associated membrane protein 2 (VAMP-2) (Synaptobrevin-2)	29	4	80	0.142857	0.0784314	0.0644258	0.86507	0	297
4978	Q93096	7803	PTP4A1	TP4A1	Protein tyrosine phosphatase type IVA 1 (EC 3.1.3.48) (PTP(CAAXI)) (Protein-tyrosine phosphatase 4a1) (Protein-tyrosine phosphatase of regenerating liver 1) (PRL-1)	25	3	80	0.123153	0.0588235	0.0643292	1.06598	0	143
5160	Q13618	8452	CUL3	CUL3	Cullin-3 (CUL-3)	29	10	80	0.142857	0.196078	-0.0532213	-0.456858	0	181
5696	P61201	9318	COPS2	CSN2	COP9 signalosome complex subunit 2 (SGN2) (Signalosome subunit 2) (Alien homolog) (JAB1-containing signalosome subunit 2) (Thyroid receptor-interacting protein 15) (TR-interacting protein 15) (TRIP-15)	27	4	80	0.133005	0.0784314	0.0545736	0.761977	0	265
5742	Q99805	9375	TM9SF2	TM9S2	Transmembrane 9 superfamily member 2 (p76)	29	7	80	0.142857	0.137255	0.00560224	0.0577155	0	114
5746	P20674	9377	COX5A	COX5A	Cytochrome c oxidase subunit 5A, mitochondrial (Cytochrome c oxidase polypeptide Va)	23	5	80	0.1133	0.0980392	0.0152613	0.208723	0	99
6625	O00425	10643	IGF2BP3	IF2B3	Insulin-like growth factor 2 mRNA-binding protein 3 (IGF2 mRNA-binding protein 3) (IMP-3) (IGF-II mRNA-binding protein 3) (KH domain-containing protein overexpressed in cancer) (hKOC) (VICKZ family member 3)	20	6	80	0.0985222	0.117647	-0.0191249	-0.255945	0	125
7019	Q96H20	11267	SNF8	SNF8	Vacuolar-sorting protein SNF8 (ELL-associated protein of 30 kDa) (ESCRT-II complex subunit VPS22) (hVps22)	20	3	80	0.0985222	0.0588235	0.0396986	0.744055	0	100
7134	Q9UKM9	22913	RALY	RALY	RNA-binding protein Raly (Autoantigen p542) (Heterogeneous nuclear ribonucleoprotein C-like 2) (hnRNP core protein C-like 2) (hnRNP associated with lethal yellow protein homolog)	25	5	80	0.123153	0.0980392	0.0251135	0.329018	2	346
9782	Q9UGV2	57446	NDRG3	NDRG3	Protein NDRG3 (N-myc downstream-regulated gene 3 protein)	26	5	80	0.128079	0.0980392	0.0300396	0.385601	0	209
10920	Q9H0X4	83986	FAM234A	F234A	Protein FAM234A (Protein ITFG3)	28	9	80	0.137931	0.176471	-0.0385396	-0.355481	0	97
718	P19256	965	CD58	LFA3	Lymphocyte function-associated antigen 3 (Ag3) (Surface glycoprotein LFA-3) (CD antigen CD58)	18	3	79	0.08867	0.0588235	0.0298464	0.592052	0	84
977	P52943	1397	CRIP2	CRIP2	Cysteine-rich protein 2 (CRP-2) (Protein ESP1)	24	5	79	0.118227	0.0980392	0.0201874	0.270124	0	100
3365	Q01970	5331	PLCB3	PLCB3	1-phosphatidylinositol 4,5-bisphosphate phosphodiesterase beta-3 (EC 3.1.4.11) (Phosphoinositide phospholipase C-beta-3) (Phospholipase C-beta-3) (PLC-beta-3)	35	5	79	0.172414	0.0980392	0.0743746	0.814444	0	197
4412	P49458	6726	SRP9	SRP09	Signal recognition particle 9 kDa protein (SRP9)	17	2	79	0.0837438	0.0392157	0.0445282	1.09455	0	92
4612	P35442	7058	THBS2	TSP2	Thrombospondin-2	23	1	79	0.1133	0.0196078	0.0936926	2.53065	0	360
4981	O75534	7812	CSDE1	CSDE1	Cold shock domain-containing protein E1 (N-ras upstream gene protein) (Protein UNR)	25	5	79	0.123153	0.0980392	0.0251135	0.329018	0	94
5438	Q9Y6R7	8857	FCGBP	FCGBP	IgGFc-binding protein (Fcgamma-binding protein antigen) (FcgammaBP)	41	6	79	0.20197	0.117647	0.0843234	0.779679	0	85
5719	Q15599	9351	SLC9A3R2	NHRF2	Na(+)/H(+) exchange regulatory cofactor NHE-RF2 (NHERF-2) (NHE3 kinase A regulatory protein E3KARP) (SRY-interacting protein 1) (SIP-1) (Sodium-hydrogen exchanger regulatory factor 2) (Solute carrier family 9 isoform A3 regulatory factor 2) (Tyrosine kinase activator protein 1) (TKA-1)	37	4	79	0.182266	0.0784314	0.103835	1.21654	0	89
6020	Q14008	9793	CKAP5	CKAP5	Cytoskeleton-associated protein 5 (Colonic and hepatic tumor overexpressed gene protein) (Ch-TOG)	31	9	79	0.152709	0.176471	-0.0237612	-0.208639	0	90
6600	Q96HC4	10611	PDLIM5	PDLI5	PDZ and LIM domain protein 5 (Enigma homolog) (Enigma-like PDZ and LIM domains protein)	24	7	79	0.118227	0.137255	-0.0190283	-0.215303	0	185
6926	O14578	11113	CIT	CTRO	Citron Rho-interacting kinase (CRIK) (EC 2.7.11.1) (Serine/threonine-protein kinase 21)	18	5	79	0.08867	0.0980392	-0.00936926	-0.144914	0	191
7196	A5YKK6	23019	CNOT1	CNOT1	CCR4-NOT transcription complex subunit 1 (CCR4-associated factor 1) (Negative regulator of transcription subunit 1 homolog) (NOT1H) (hNOT1)	35	5	79	0.172414	0.0980392	0.0743746	0.814444	0	99
8312	Q9Y5P6	29925	GMPPB	GMPPB	Mannose-1-phosphate guanyltransferase beta (EC 2.7.7.13) (GDP-mannose pyrophosphorylase B) (GTP-mannose-1-phosphate guanylyltransferase beta)	35	6	79	0.172414	0.117647	0.0547667	0.55141	1	155
8427	Q9Y3B3	51014	TMED7	TMED7	Transmembrane emp24 domain-containing protein 7 (p24 family protein gamma-3) (p24gamma3) (p27)	22	2	79	0.108374	0.0392157	0.0691587	1.46652	0	102
8661	Q9P2R3	51479	ANKFY1	ANFY1	Rabankyrin-5 (Rank-5) (Ankyrin repeat and FYVE domain-containing protein 1) (Ankyrin repeats hooked to a zinc finger motif)	36	4	79	0.17734	0.0784314	0.0989085	1.17701	5	373
8732	Q9Y3C6	51645	PPIL1	PPIL1	Peptidyl-prolyl cis-trans isomerase-like 1 (PPIase) (EC 5.2.1.8) (Rotamase PPIL1)	19	2	79	0.0935961	0.0392157	0.0543804	1.25502	22	494
8897	Q9HBH0	54509	RHOF	RHOF	Rho-related GTP-binding protein RhoF (Rho family GTPase Rif) (Rho in filopodia)	28	2	79	0.137931	0.0392157	0.0987153	1.81444	0	533
11849	Q96DG6	134147	CMBL	CMBL	Carboxymethylenebutenolidase homolog (EC 3.1.-.-)	30	6	79	0.147783	0.117647	0.0301362	0.329018	9	82
389	P24539	515	ATP5PB	AT5F1	ATP synthase F(0) complex subunit B1, mitochondrial (ATP synthase proton-transporting mitochondrial F(0) complex subunit B1) (ATP synthase subunit b) (ATPase subunit b)	11	7	78	0.0541872	0.137255	-0.0830677	-1.34083	0	103
1198	P11532	1756	DMD	DMD	Dystrophin	15	2	78	0.0738916	0.0392157	0.0346759	0.91398	0	536
1236	Q14195	1809	DPYSL3	DPYL3	Dihydropyrimidinase-related protein 3 (DRP-3) (Collapsin response mediator protein 4) (CRMP-4) (Unc-33-like phosphoprotein 1) (ULIP-1)	29	5	78	0.142857	0.0980392	0.0448179	0.543142	14	288
1374	P11171	2035	EPB41	41	Protein 4.1 (P4.1) (4.1R) (Band 4.1) (EPB4.1)	34	10	78	0.167488	0.196078	-0.0285907	-0.227376	0	96
2443	Q07866	3831	KLC1	KLC1	Kinesin light chain 1 (KLC 1)	24	5	78	0.118227	0.0980392	0.0201874	0.270124	37	199
3338	Q13526	5300	PIN1	PIN1	Peptidyl-prolyl cis-trans isomerase NIMA-interacting 1 (EC 5.2.1.8) (Peptidyl-prolyl cis-trans isomerase Pin1) (PPIase Pin1) (Rotamase Pin1)	25	2	78	0.123153	0.0392157	0.083937	1.65095	62	111
3363	Q03405	5329	PLAUR	UPAR	Urokinase plasminogen activator surface receptor (U-PAR) (uPAR) (Monocyte activation antigen Mo3) (CD antigen CD87)	25	5	78	0.123153	0.0980392	0.0251135	0.329018	0	90
3563	P36507	5605	MAP2K2	MP2K2	Dual specificity mitogen-activated protein kinase kinase 2 (MAP kinase kinase 2) (MAPKK 2) (EC 2.7.12.2) (ERK activator kinase 2) (MAPK/ERK kinase 2) (MEK 2)	28	6	78	0.137931	0.117647	0.020284	0.229482	0	146
3635	P28065	5698	PSMB9	PSB9	Proteasome subunit beta type-9 (EC 3.4.25.1) (Low molecular mass protein 2) (Macropain chain 7) (Multicatalytic endopeptidase complex chain 7) (Proteasome chain 7) (Proteasome subunit beta-1i) (Really interesting new gene 12 protein)	17	7	78	0.0837438	0.137255	-0.0535111	-0.712803	0	275
3750	P54886	5832	ALDH18A1	P5CS	Delta-1-pyrroline-5-carboxylate synthase (P5CS) (Aldehyde dehydrogenase family 18 member A1) [Includes: Glutamate 5-kinase (GK) (EC 2.7.2.11) (Gamma-glutamyl kinase); Gamma-glutamyl phosphate reductase (GPR) (EC 1.2.1.41) (Glutamate-5-semialdehyde dehydrogenase) (Glutamyl-gamma-semialdehyde dehydrogenase)]	20	8	78	0.0985222	0.156863	-0.0583406	-0.670982	7	81
4326	P09012	6626	SNRPA	SNRPA	U1 small nuclear ribonucleoprotein A (U1 snRNP A) (U1-A) (U1A)	14	6	78	0.0689655	0.117647	-0.0486815	-0.770518	0	105
5520	Q13228	8991	SELENBP1	SBP1	Selenium-binding protein 1 (56 kDa selenium-binding protein) (SBP56) (SP56)	40	7	78	0.197044	0.137255	0.0597894	0.521663	0	101
6289	P41567	10209	EIF1	EIF1	Eukaryotic translation initiation factor 1 (eIF1) (A121) (Protein translation factor SUI1 homolog) (Sui1iso1)	18	2	78	0.08867	0.0392157	0.0494543	1.17701	0	119
6700	O75494	10772	SRSF10	SRS10	Serine/arginine-rich splicing factor 10 (40 kDa SR-repressor protein) (SRrp40) (FUS-interacting serine-arginine-rich protein 1) (Splicing factor SRp38) (Splicing factor, arginine/serine-rich 13A) (TLS-associated protein with Ser-Arg repeats) (TASR) (TLS-associated protein with SR repeats) (TLS-associated serine-arginine protein) (TLS-associated SR protein)	15	1	78	0.0738916	0.0196078	0.0542838	1.91398	2	346
7487	Q9UBI1	23412	COMMD3	COMD3	COMM domain-containing protein 3 (Protein Bup) (Protein PIL)	19	1	78	0.0935961	0.0196078	0.0739882	2.25502	0	89
9619	Q9BUT1	56898	BDH2	BDH2	3-hydroxybutyrate dehydrogenase type 2 (EC 1.1.1.-) (EC 1.1.1.30) (Dehydrogenase/reductase SDR family member 6) (Oxidoreductase UCPA) (R-beta-hydroxybutyrate dehydrogenase) (Short chain dehydrogenase/reductase family 15C member 1)	26	5	78	0.128079	0.0980392	0.0300396	0.385601	9	300
10342	Q9BQA1	79084	WDR77	MEP50	Methylosome protein 50 (MEP-50) (Androgen receptor cofactor p44) (WD repeat-containing protein 77) (p44/Mep50)	28	7	78	0.137931	0.137255	0.000676133	0.00708942	0	92
12377	Q8ND76	219771	CCNY	CCNY	Cyclin-Y (Cyc-Y) (Cyclin box protein 1) (Cyclin fold protein 1) (cyclin-X)	26	5	78	0.128079	0.0980392	0.0300396	0.385601	0	108
296	P05089	383	ARG1	ARGI1	Arginase-1 (EC 3.5.3.1) (Liver-type arginase) (Type I arginase)	29	9	77	0.142857	0.176471	-0.0336134	-0.304855	2	93
468	P13497	649	BMP1	BMP1	Bone morphogenetic protein 1 (BMP-1) (EC 3.4.24.19) (Mammalian tolloid protein) (mTld) (Procollagen C-proteinase) (PCP)	13	2	77	0.0640394	0.0392157	0.0248237	0.707529	0	174
1182	O60832	1736	DKC1	DKC1	H/ACA ribonucleoprotein complex subunit 4 (EC 5.4.99.-) (CBF5 homolog) (Dyskerin) (Nopp140-associated protein of 57 kDa) (Nucleolar protein NAP57) (Nucleolar protein family A member 4) (snoRNP protein DKC1)	27	5	77	0.133005	0.0980392	0.0349657	0.440049	2	95
1546	Q00688	2287	FKBP3	FKBP3	Peptidyl-prolyl cis-trans isomerase FKBP3 (PPIase FKBP3) (EC 5.2.1.8) (25 kDa FK506-binding protein) (25 kDa FKBP) (FKBP-25) (FK506-binding protein 3) (FKBP-3) (Immunophilin FKBP25) (Rapamycin-selective 25 kDa immunophilin) (Rotamase)	28	2	77	0.137931	0.0392157	0.0987153	1.81444	44	278
1638	Q10471	2590	GALNT2	GALT2	Polypeptide N-acetylgalactosaminyltransferase 2 (EC 2.4.1.41) (Polypeptide GalNAc transferase 2) (GalNAc-T2) (pp-GaNTase 2) (Protein-UDP acetylgalactosaminyltransferase 2) (UDP-GalNAc:polypeptide N-acetylgalactosaminyltransferase 2) [Cleaved into: Polypeptide N-acetylgalactosaminyltransferase 2 soluble form]	31	5	77	0.152709	0.0980392	0.0546701	0.639358	0	90
1917	P0C0S5	3015	H2AZ1	H2AZ	Histone H2A.Z (H2A/z)	41	7	77	0.20197	0.137255	0.0647155	0.557287	0	452
2259	P01877	3494	IGHA2	IGHA2	Immunoglobulin heavy constant alpha 2 (Ig alpha-2 chain C region) (Ig alpha-2 chain C region BUT) (Ig alpha-2 chain C region LAN)	35	9	77	0.172414	0.176471	-0.0040568	-0.0335526	0	77
2516	Q16787	3909	LAMA3	LAMA3	Laminin subunit alpha-3 (Epiligrin 170 kDa subunit) (E170) (Epiligrin subunit alpha) (Kalinin subunit alpha) (Laminin-5 subunit alpha) (Laminin-6 subunit alpha) (Laminin-7 subunit alpha) (Nicein subunit alpha)	21	2	77	0.103448	0.0392157	0.0642326	1.39941	0	286
2790	P08253	4313	MMP2	MMP2	72 kDa type IV collagenase (EC 3.4.24.24) (72 kDa gelatinase) (Gelatinase A) (Matrix metalloproteinase-2) (MMP-2) (TBE-1) [Cleaved into: PEX]	34	6	77	0.167488	0.117647	0.0498406	0.50959	0	424
3056	Q04721	4853	NOTCH2	NOTC2	Neurogenic locus notch homolog protein 2 (Notch 2) (hN2) [Cleaved into: Notch 2 extracellular truncation (N2ECD); Notch 2 intracellular domain (N2ICD)]	30	5	77	0.147783	0.0980392	0.049744	0.592052	5	373
4074	P31151	6278	S100A7	S10A7	Protein S100-A7 (Psoriasin) (S100 calcium-binding protein A7)	29	7	77	0.142857	0.137255	0.00560224	0.0577155	0	82
4606	Q08188	7053	TGM3	TGM3	Protein-glutamine gamma-glutamyltransferase E (EC 2.3.2.13) (Transglutaminase E) (TG(E)) (TGE) (TGase E) (Transglutaminase-3) (TGase-3) [Cleaved into: Protein-glutamine gamma-glutamyltransferase E 50 kDa catalytic chain; Protein-glutamine gamma-glutamyltransferase E 27 kDa non-catalytic chain]	32	6	77	0.157635	0.117647	0.0399884	0.422127	0	308
9741	Q9ULF5	57181	SLC39A10	S39AA	Zinc transporter ZIP10 (Solute carrier family 39 member 10) (Zrt- and Irt-like protein 10) (ZIP-10)	27	5	77	0.133005	0.0980392	0.0349657	0.440049	0	185
9920	Q63HN8	57674	RNF213	RN213	E3 ubiquitin-protein ligase RNF213 (EC 2.3.2.27) (EC 3.6.4.-) (ALK lymphoma oligomerization partner on chromosome 17) (Mysterin) (RING finger protein 213) (RING-type E3 ubiquitin transferase RNF213)	24	2	77	0.118227	0.0392157	0.0790109	1.59205	0	78
10541	Q53TN4	79901	CYBRD1	CYBR1	Cytochrome b reductase 1 (EC 1.-.-.-) (Duodenal cytochrome b) (Ferric-chelate reductase 3)	37	2	77	0.182266	0.0392157	0.14305	2.21654	0	90
318	P40616	400	ARL1	ARL1	ADP-ribosylation factor-like protein 1	21	5	76	0.103448	0.0980392	0.00540906	0.0774788	0	533
1272	P42892	1889	ECE1	ECE1	Endothelin-converting enzyme 1 (ECE-1) (EC 3.4.24.71)	25	6	76	0.123153	0.117647	0.00550565	0.0659831	10	216
1510	P39748	2237	FEN1	FEN1	Flap endonuclease 1 (FEN-1) (EC 3.1.-.-) (DNase IV) (Flap structure-specific endonuclease 1) (Maturation factor 1) (MF1) (hFEN-1)	27	4	76	0.133005	0.0784314	0.0545736	0.761977	14	105
1628	Q14376	2582	GALE	GALE	UDP-glucose 4-epimerase (EC 5.1.3.2) (Galactowaldenase) (UDP-N-acetylgalactosamine 4-epimerase) (UDP-GalNAc 4-epimerase) (UDP-N-acetylglucosamine 4-epimerase) (UDP-GlcNAc 4-epimerase) (EC 5.1.3.7) (UDP-galactose 4-epimerase)	19	5	76	0.0935961	0.0980392	-0.00444316	-0.0669112	4	94
1920	P33778	3018	H2BC3	H2B1B	Histone H2B type 1-B (Histone H2B.1) (Histone H2B.f) (H2B/f)	43	8	76	0.211823	0.156863	0.0549599	0.433354	0	434
1994	P10316	3105	#N/A	1A69	HLA class I histocompatibility antigen, A-69 alpha chain (Aw-69) (HLA class I histocompatibility antigen, A-28 alpha chain) (MHC class I antigen A*69)	14	5	76	0.0689655	0.0980392	-0.0290737	-0.507484	0	372
2519	Q16363	3910	LAMA4	LAMA4	Laminin subunit alpha-4 (Laminin-14 subunit alpha) (Laminin-8 subunit alpha) (Laminin-9 subunit alpha)	27	3	76	0.133005	0.0588235	0.0741814	1.17701	0	103
3147	P13674	5033	P4HA1	P4HA1	Prolyl 4-hydroxylase subunit alpha-1 (4-PH alpha-1) (EC 1.14.11.2) (Procollagen-proline,2-oxoglutarate-4-dioxygenase subunit alpha-1)	23	8	76	0.1133	0.156863	-0.0435623	-0.469349	0	100
3578	P11908	5634	PRPS2	PRPS2	Ribose-phosphate pyrophosphokinase 2 (EC 2.7.6.1) (PPRibP) (Phosphoribosyl pyrophosphate synthase II) (PRS-II)	26	4	76	0.128079	0.0784314	0.0496474	0.707529	35	205
4140	P31040	6389	SDHA	SDHA	Succinate dehydrogenase [ubiquinone] flavoprotein subunit, mitochondrial (EC 1.3.5.1) (Flavoprotein subunit of complex II) (Fp)	19	4	76	0.0935961	0.0784314	0.0151647	0.255017	46	122
5204	P13164	8519	IFITM1	IFM1	Interferon-induced transmembrane protein 1 (Dispanin subfamily A member 2a) (DSPA2a) (Interferon-induced protein 17) (Interferon-inducible protein 9-27) (Leu-13 antigen) (CD antigen CD225)	31	8	76	0.152709	0.156863	-0.00415339	-0.0387143	0	214
5218	Q9BZZ5	8539	API5	API5	Apoptosis inhibitor 5 (API-5) (Antiapoptosis clone 11 protein) (AAC-11) (Cell migration-inducing gene 8 protein) (Fibroblast growth factor 2-interacting factor) (FIF) (Protein XAGL)	18	5	76	0.08867	0.0980392	-0.00936926	-0.144914	0	88
6541	Q9UNN8	10544	PROCR	EPCR	Endothelial protein C receptor (Activated protein C receptor) (APC receptor) (Endothelial cell protein C receptor) (CD antigen CD201)	27	4	76	0.133005	0.0784314	0.0545736	0.761977	0	82
7518	Q9Y6W3	23473	CAPN7	CAN7	Calpain-7 (EC 3.4.22.-) (PalB homolog) (PalBH)	42	3	76	0.206897	0.0588235	0.148073	1.81444	0	310
8455	Q9Y316	51072	MEMO1	MEMO1	Protein MEMO1 (C21orf19-like protein) (Hepatitis C virus NS5A-transactivated protein 7) (HCV NS5A-transactivated protein 7) (Mediator of ErbB2-driven cell motility 1) (Mediator of cell motility 1) (Memo-1)	27	8	76	0.133005	0.156863	-0.0238578	-0.238023	0	101
8512	Q53GQ0	51144	HSD17B12	DHB12	Very-long-chain 3-oxoacyl-CoA reductase (EC 1.1.1.330) (17-beta-hydroxysteroid dehydrogenase 12) (17-beta-HSD 12) (3-ketoacyl-CoA reductase) (KAR) (Estradiol 17-beta-dehydrogenase 12) (EC 1.1.1.62) (Short chain dehydrogenase/reductase family 12C member 1)	21	6	76	0.103448	0.117647	-0.0141988	-0.185556	2	119
8693	Q9NRW1	51560	RAB6B	RAB6B	Ras-related protein Rab-6B	21	7	76	0.103448	0.137255	-0.0338066	-0.407948	0	265
10744	Q9H3N1	81542	TMX1	TMX1	Thioredoxin-related transmembrane protein 1 (Thioredoxin domain-containing protein 1) (Transmembrane Trx-related protein)	20	8	76	0.0985222	0.156863	-0.0583406	-0.670982	0	83
10897	Q96RW7	83872	HMCN1	HMCN1	Hemicentin-1 (Fibulin-6) (FIBL-6)	22	3	76	0.108374	0.0588235	0.0495509	0.881559	0	111
676	O43866	922	CD5L	CD5L	CD5 antigen-like (Apoptosis inhibitor expressed by macrophages) (hAIM) (CT-2) (IgM-associated peptide) (SP-alpha)	34	9	75	0.167488	0.176471	-0.0089829	-0.0753727	0	94
1255	P50443	1836	SLC26A2	S26A2	Sulfate transporter (Diastrophic dysplasia protein) (Solute carrier family 26 member 2)	35	4	75	0.172414	0.0784314	0.0939824	1.13637	1	111
1586	P42345	2475	MTOR	MTOR	Serine/threonine-protein kinase mTOR (EC 2.7.11.1) (FK506-binding protein 12-rapamycin complex-associated protein 1) (FKBP12-rapamycin complex-associated protein) (Mammalian target of rapamycin) (mTOR) (Mechanistic target of rapamycin) (Rapamycin and FKBP12 target 1) (Rapamycin target protein 1)	31	6	75	0.152709	0.117647	0.0350623	0.376323	0	267
3136	P22059	5007	OSBP	OSBP1	Oxysterol-binding protein 1	27	6	75	0.133005	0.117647	0.0153579	0.177014	0	108
3204	Q15113	5118	PCOLCE	PCOC1	Procollagen C-endopeptidase enhancer 1 (Procollagen COOH-terminal proteinase enhancer 1) (PCPE-1) (Procollagen C-proteinase enhancer 1) (Type 1 procollagen C-proteinase enhancer protein) (Type I procollagen COOH-terminal proteinase enhancer)	32	6	75	0.157635	0.117647	0.0399884	0.422127	0	122
3242	P16284	5175	PECAM1	PECA1	Platelet endothelial cell adhesion molecule (PECAM-1) (EndoCAM) (GPIIA') (PECA1) (CD antigen CD31)	18	14	75	0.08867	0.27451	-0.18584	-1.63034	0	78
3412	O95164	5412	UBL3	UBL3	Ubiquitin-like protein 3 (Membrane-anchored ubiquitin-fold protein) (HsMUB) (MUB) (Protein HCG-1)	25	2	75	0.123153	0.0392157	0.083937	1.65095	0	91
3694	P06454	5757	PTMA	PTMA	Prothymosin alpha [Cleaved into: Prothymosin alpha, N-terminally processed; Thymosin alpha-1]	22	6	75	0.108374	0.117647	-0.00927267	-0.118441	0	88
5035	Q92783	8027	STAM	STAM1	Signal transducing adapter molecule 1 (STAM-1)	27	2	75	0.133005	0.0392157	0.0937892	1.76198	0	111
5058	P39687	8125	ANP32A	AN32A	Acidic leucine-rich nuclear phosphoprotein 32 family member A (Acidic nuclear phosphoprotein pp32) (pp32) (Leucine-rich acidic nuclear protein) (LANP) (Mapmodulin) (Potent heat-stable protein phosphatase 2A inhibitor I1PP2A) (Putative HLA-DR-associated protein I) (PHAPI)	17	4	75	0.0837438	0.0784314	0.00531247	0.0945523	0	134
5771	Q9UDY2	9414	TJP2	ZO2	Tight junction protein ZO-2 (Tight junction protein 2) (Zona occludens protein 2) (Zonula occludens protein 2)	34	5	75	0.167488	0.0980392	0.0694485	0.772624	0	122
6222	Q92878	10111	RAD50	RAD50	DNA repair protein RAD50 (hRAD50) (EC 3.6.-.-)	28	1	75	0.137931	0.0196078	0.118323	2.81444	0	88
6640	Q07666	10657	KHDRBS1	KHDR1	KH domain-containing, RNA-binding, signal transduction-associated protein 1 (GAP-associated tyrosine phosphoprotein p62) (Src-associated in mitosis 68 kDa protein) (Sam68) (p21 Ras GTPase-activating protein-associated p62) (p68)	25	3	75	0.123153	0.0588235	0.0643292	1.06598	0	98
8641	Q9Y5X1	51429	SNX9	SNX9	Sorting nexin-9 (SH3 and PX domain-containing protein 1) (Protein SDP1) (SH3 and PX domain-containing protein 3A)	33	3	75	0.162562	0.0588235	0.103738	1.46652	0	147
9990	Q9P1F3	58527	ABRACL	ABRAL	Costars family protein ABRACL (ABRA C-terminal-like protein)	15	1	75	0.0738916	0.0196078	0.0542838	1.91398	0	86
10612	Q8NBZ7	80146	UXS1	UXS1	UDP-glucuronic acid decarboxylase 1 (EC 4.1.1.35) (UDP-glucuronate decarboxylase 1) (UGD) (UXS-1)	12	1	75	0.0591133	0.0196078	0.0395055	1.59205	15	178
12703	Q6DN03	337873	#N/A	H2B2C	Putative histone H2B type 2-C (Histone H2B.t) (H2B/t)	8	0	75	0.0394089	0	0.0394089	#DIV/0!	0	75
89	P35611	118	ADD1	ADDA	Alpha-adducin (Erythrocyte adducin subunit alpha)	29	8	74	0.142857	0.156863	-0.0140056	-0.13493	3	114
1209	P49184	1774	DNASE1L1	DNSL1	Deoxyribonuclease-1-like 1 (EC 3.1.21.-) (DNase X) (Deoxyribonuclease I-like 1) (DNase I-like 1) (Muscle-specific DNase I-like) (XIB)	20	3	74	0.0985222	0.0588235	0.0396986	0.744055	0	105
1317	P47813	1964	EIF1AX	IF1AX	Eukaryotic translation initiation factor 1A, X-chromosomal (eIF-1A X isoform) (Eukaryotic translation initiation factor 4C) (eIF-4C)	16	1	74	0.0788177	0.0196078	0.0592099	2.00709	2	96
1807	P36969	2879	GPX4	GPX4	Phospholipid hydroperoxide glutathione peroxidase, mitochondrial (PHGPx) (EC 1.11.1.12) (Glutathione peroxidase 4) (GPx-4) (GSHPx-4)	24	4	74	0.118227	0.0784314	0.0397952	0.592052	2	224
1908	P16402	3007	H1-3	H13	Histone H1.3 (Histone H1c) (Histone H1s-2)	42	3	74	0.206897	0.0588235	0.148073	1.81444	0	299
2043	Q29940	3106	#N/A	1B59	HLA class I histocompatibility antigen, B-59 alpha chain (MHC class I antigen B*59)	10	1	74	0.0492611	0.0196078	0.0296532	1.32902	0	372
2468	P19013	3851	KRT4	K2C4	Keratin, type II cytoskeletal 4 (Cytokeratin-4) (CK-4) (Keratin-4) (K4) (Type-II keratin Kb4)	28	5	74	0.137931	0.0980392	0.0398918	0.492516	0	113
2568	P47929	3963	LGALS7B	LEG7	Galectin-7 (Gal-7) (HKL-14) (PI7) (p53-induced gene 1 protein)	26	5	74	0.128079	0.0980392	0.0300396	0.385601	0	358
3579	Q14558	5635	PRPSAP1	KPRA	Phosphoribosyl pyrophosphate synthase-associated protein 1 (PRPP synthase-associated protein 1) (39 kDa phosphoribosypyrophosphate synthase-associated protein) (PAP39)	22	4	74	0.108374	0.0784314	0.029943	0.466521	35	205
3847	P02753	5950	RBP4	RET4	Retinol-binding protein 4 (Plasma retinol-binding protein) (PRBP) (RBP) [Cleaved into: Plasma retinol-binding protein(1-182); Plasma retinol-binding protein(1-181); Plasma retinol-binding protein(1-179); Plasma retinol-binding protein(1-176)]	45	10	74	0.221675	0.196078	0.0255964	0.177014	0	92
4431	P43307	6745	SSR1	SSRA	Translocon-associated protein subunit alpha (TRAP-alpha) (Signal sequence receptor subunit alpha) (SSR-alpha)	10	7	74	0.0492611	0.137255	-0.0879938	-1.47834	0	95
4464	O94804	6793	STK10	STK10	Serine/threonine-protein kinase 10 (EC 2.7.11.1) (Lymphocyte-oriented kinase)	34	2	74	0.167488	0.0392157	0.128272	2.09455	0	150
4589	P01137	7040	#N/A	TGFB1	Transforming growth factor beta-1 (TGF-beta-1) [Cleaved into: Latency-associated peptide (LAP)]	11	4	74	0.0541872	0.0784314	-0.0242442	-0.533479	0	205
6058	O94826	9868	TOMM70	TOM70	Mitochondrial import receptor subunit TOM70 (Mitochondrial precursor proteins import receptor) (Translocase of outer membrane 70 kDa subunit) (Translocase of outer mitochondrial membrane protein 70)	20	7	74	0.0985222	0.137255	-0.0387327	-0.478337	0	78
6170	Q9NTJ3	10051	SMC4	SMC4	Structural maintenance of chromosomes protein 4 (SMC protein 4) (SMC-4) (Chromosome-associated polypeptide C) (hCAP-C) (XCAP-C homolog)	22	4	74	0.108374	0.0784314	0.029943	0.466521	2	175
6211	O60637	10099	TSPAN3	TSN3	Tetraspanin-3 (Tspan-3) (Tetraspanin TM4-A) (Transmembrane 4 superfamily member 8)	30	4	74	0.147783	0.0784314	0.0693519	0.91398	0	453
6259	Q9Y4F1	10160	FARP1	FARP1	FERM, RhoGEF and pleckstrin domain-containing protein 1 (Chondrocyte-derived ezrin-like protein) (Pleckstrin homology domain-containing family C member 2) (PH domain-containing family C member 2)	34	3	74	0.167488	0.0588235	0.108664	1.50959	0	106
6320	P52758	10247	RIDA	UK114	Ribonuclease UK114 (EC 3.1.-.-) (14.5 kDa translational inhibitor protein) (p14.5) (Heat-responsive protein 12) (UK114 antigen homolog)	28	5	74	0.137931	0.0980392	0.0398918	0.492516	24	88
6405	O95861	10380	BPNT1	BPNT1	3'(2'),5'-bisphosphate nucleotidase 1 (EC 3.1.3.7) (Bisphosphate 3'-nucleotidase 1) (PAP-inositol 1,4-phosphatase) (PIP)	30	9	74	0.147783	0.176471	-0.0286873	-0.255945	0	101
6548	Q92747	10552	ARPC1A	ARC1A	Actin-related protein 2/3 complex subunit 1A (SOP2-like protein)	29	7	74	0.142857	0.137255	0.00560224	0.0577155	0	235
7616	Q8IV08	23646	PLD3	PLD3	Phospholipase D3 (PLD 3) (EC 3.1.4.4) (Choline phosphatase 3) (HindIII K4L homolog) (Hu-K4) (Phosphatidylcholine-hydrolyzing phospholipase D3)	40	6	74	0.197044	0.117647	0.0793973	0.744055	1	102
8899	Q9NPD3	54512	EXOSC4	EXOS4	Exosome complex component RRP41 (Exosome component 4) (Ribosomal RNA-processing protein 41) (p12A)	16	1	74	0.0788177	0.0196078	0.0592099	2.00709	6	88
10098	Q969X1	64114	TMBIM1	LFG3	Protein lifeguard 3 (Protein RECS1 homolog) (Transmembrane BAX inhibitor motif-containing protein 1)	32	5	74	0.157635	0.0980392	0.0595963	0.685161	0	108
11499	Q969E2	113178	SCAMP4	SCAM4	Secretory carrier-associated membrane protein 4 (Secretory carrier membrane protein 4)	23	4	74	0.1133	0.0784314	0.0348691	0.530651	0	219
11562	Q9BXJ4	114899	C1QTNF3	C1QT3	Complement C1q tumor necrosis factor-related protein 3 (Collagenous repeat-containing sequence 26 kDa protein) (CORS26) (Secretory protein CORS26)	26	1	74	0.128079	0.0196078	0.108471	2.70753	0	87
12075	Q9P0V9	151011	SEPTIN10	SEP10	Septin-10	18	3	74	0.08867	0.0588235	0.0298464	0.592052	0	317
979	P46109	1399	CRKL	CRKL	Crk-like protein	28	6	73	0.137931	0.117647	0.020284	0.229482	0	126
1735	P09471	2775	GNAO1	GNAO	Guanine nucleotide-binding protein G(o) subunit alpha	41	3	73	0.20197	0.0588235	0.143147	1.77968	0	444
1999	P04439	3105	HLA-A	1A03	HLA class I histocompatibility antigen, A-3 alpha chain (MHC class I antigen A*3)	22	5	73	0.108374	0.0980392	0.0103352	0.144593	0	372
2453	O00505	3839	KPNA3	IMA4	Importin subunit alpha-4 (Importin alpha Q2) (Qip2) (Karyopherin subunit alpha-3) (SRP1-gamma)	25	3	73	0.123153	0.0588235	0.0643292	1.06598	0	197
2713	P33992	4174	MCM5	MCM5	DNA replication licensing factor MCM5 (EC 3.6.4.12) (CDC46 homolog) (P1-CDC46)	25	2	73	0.123153	0.0392157	0.083937	1.65095	0	181
3911	P27694	6117	RPA1	RFA1	Replication protein A 70 kDa DNA-binding subunit (RP-A p70) (Replication factor A protein 1) (RF-A protein 1) (Single-stranded DNA-binding protein) [Cleaved into: Replication protein A 70 kDa DNA-binding subunit, N-terminally processed]	27	2	73	0.133005	0.0392157	0.0937892	1.76198	0	88
5112	Q99880	8340	H2BC13	H2B1L	Histone H2B type 1-L (Histone H2B.c) (H2B/c)	29	6	73	0.142857	0.117647	0.0252101	0.280108	0	434
6174	Q9UBE0	10055	SAE1	SAE1	SUMO-activating enzyme subunit 1 (Ubiquitin-like 1-activating enzyme E1A) [Cleaved into: SUMO-activating enzyme subunit 1, N-terminally processed]	17	3	73	0.0837438	0.0588235	0.0249203	0.50959	0	375
6977	Q9Y446	11187	PKP3	PKP3	Plakophilin-3	30	2	73	0.147783	0.0392157	0.108568	1.91398	0	255
7168	P49902	22978	NT5C2	5NTC	Cytosolic purine 5'-nucleotidase (EC 3.1.3.5) (Cytosolic 5'-nucleotidase II)	19	7	73	0.0935961	0.137255	-0.0436588	-0.552338	0	107
7333	Q15041	23204	ARL6IP1	AR6P1	ADP-ribosylation factor-like protein 6-interacting protein 1 (ARL-6-interacting protein 1) (Aip-1) (Apoptotic regulator in the membrane of the endoplasmic reticulum)	8	1	73	0.0394089	0.0196078	0.019801	1.00709	0	91
7610	Q9Y3P9	23637	RABGAP1	RBGP1	Rab GTPase-activating protein 1 (GAP and centrosome-associated protein) (Rab6 GTPase-activating protein GAPCenA)	18	1	73	0.08867	0.0196078	0.0690621	2.17701	0	158
8501	Q9Y6B6	51128	SAR1B	SAR1B	GTP-binding protein SAR1b (GTP-binding protein B) (GTBPB)	13	5	73	0.0640394	0.0980392	-0.0339998	-0.614399	0	168
8515	Q9BRK5	51150	SDF4	CAB45	45 kDa calcium-binding protein (Cab45) (Stromal cell-derived factor 4) (SDF-4)	26	4	73	0.128079	0.0784314	0.0496474	0.707529	0	78
8764	Q9NZH0	51704	GPRC5B	GPC5B	G-protein coupled receptor family C group 5 member B (A-69G12.1) (Retinoic acid-induced gene 2 protein) (RAIG-2)	41	3	73	0.20197	0.0588235	0.143147	1.77968	0	103
9227	Q96G03	55276	PGM2	PGM2	Phosphoglucomutase-2 (PGM 2) (EC 5.4.2.2) (Glucose phosphomutase 2) (Phosphodeoxyribomutase) (Phosphopentomutase) (EC 5.4.2.7)	25	9	73	0.123153	0.176471	-0.0533179	-0.518979	16	123
10034	Q9NRN7	60496	AASDHPPT	ADPPT	L-aminoadipate-semialdehyde dehydrogenase-phosphopantetheinyl transferase (EC 2.7.8.-) (4'-phosphopantetheinyl transferase) (Alpha-aminoadipic semialdehyde dehydrogenase-phosphopantetheinyl transferase) (AASD-PPT) (LYS5 ortholog)	20	5	73	0.0985222	0.0980392	0.000482952	0.00708942	0	78
526	P13671	729	C6	CO6	Complement component C6	33	7	72	0.162562	0.137255	0.0253067	0.244129	0	120
1467	O95573	2181	ACSL3	ACSL3	Long-chain-fatty-acid--CoA ligase 3 (EC 6.2.1.3) (Long-chain acyl-CoA synthetase 3) (LACS 3)	28	6	72	0.137931	0.117647	0.020284	0.229482	1	250
1703	P48507	2730	GCLM	GSH0	Glutamate--cysteine ligase regulatory subunit (GCS light chain) (Gamma-ECS regulatory subunit) (Gamma-glutamylcysteine synthetase regulatory subunit) (Glutamate--cysteine ligase modifier subunit)	23	6	72	0.1133	0.117647	-0.00434657	-0.0543111	5	321
2047	P30460	3106	#N/A	1B08	HLA class I histocompatibility antigen, B-8 alpha chain (MHC class I antigen B*8)	12	1	72	0.0591133	0.0196078	0.0395055	1.59205	0	372
2675	Q16706	4124	MAN2A1	MA2A1	Alpha-mannosidase 2 (EC 3.2.1.114) (Golgi alpha-mannosidase II) (AMan II) (Man II) (Mannosidase alpha class 2A member 1) (Mannosyl-oligosaccharide 1,3-1,6-alpha-mannosidase)	30	5	72	0.147783	0.0980392	0.049744	0.592052	0	175
2711	P33991	4173	MCM4	MCM4	DNA replication licensing factor MCM4 (EC 3.6.4.12) (CDC21 homolog) (P1-CDC21)	18	5	72	0.08867	0.0980392	-0.00936926	-0.144914	0	181
2746	P08581	4233	MET	MET	Hepatocyte growth factor receptor (HGF receptor) (EC 2.7.10.1) (HGF/SF receptor) (Proto-oncogene c-Met) (Scatter factor receptor) (SF receptor) (Tyrosine-protein kinase Met)	25	2	72	0.123153	0.0392157	0.083937	1.65095	10	419
2903	P35749	4629	MYH11	MYH11	Myosin-11 (Myosin heavy chain 11) (Myosin heavy chain, smooth muscle isoform) (SMMHC)	28	8	72	0.137931	0.156863	-0.0189317	-0.185556	0	508
2905	P08590	4634	MYL3	MYL3	Myosin light chain 3 (Cardiac myosin light chain 1) (CMLC1) (Myosin light chain 1, slow-twitch muscle B/ventricular isoform) (MLC1SB) (Ventricular myosin alkali light chain) (Ventricular myosin light chain 1) (VLCl) (Ventricular/slow twitch myosin alkali light chain) (MLC-lV/sb)	6	1	72	0.0295567	0.0196078	0.00994881	0.592052	0	452
2935	Q13765	4666	NACA	NACA	Nascent polypeptide-associated complex subunit alpha (NAC-alpha) (Alpha-NAC) (allergen Hom s 2)	36	6	72	0.17734	0.117647	0.0596928	0.592052	0	201
3500	P50897	5538	PPT1	PPT1	Palmitoyl-protein thioesterase 1 (PPT-1) (EC 3.1.2.22) (Palmitoyl-protein hydrolase 1)	23	4	72	0.1133	0.0784314	0.0348691	0.530651	6	87
3516	Q13131	5562	PRKAA1	AAPK1	5'-AMP-activated protein kinase catalytic subunit alpha-1 (AMPK subunit alpha-1) (EC 2.7.11.1) (Acetyl-CoA carboxylase kinase) (ACACA kinase) (EC 2.7.11.27) (Hydroxymethylglutaryl-CoA reductase kinase) (HMGCR kinase) (EC 2.7.11.31) (Tau-protein kinase PRKAA1) (EC 2.7.11.26)	25	3	72	0.123153	0.0588235	0.0643292	1.06598	0	143
3711	P08575	5788	PTPRC	PTPRC	Receptor-type tyrosine-protein phosphatase C (EC 3.1.3.48) (Leukocyte common antigen) (L-CA) (T200) (CD antigen CD45)	26	14	72	0.128079	0.27451	-0.146431	-1.09983	0	344
3734	Q96QR8	5814	PURB	PURB	Transcriptional activator protein Pur-beta (Purine-rich element-binding protein B)	23	4	72	0.1133	0.0784314	0.0348691	0.530651	0	144
4166	Q01130	6427	SRSF2	SRSF2	Serine/arginine-rich splicing factor 2 (Protein PR264) (Splicing component, 35 kDa) (Splicing factor SC35) (SC-35) (Splicing factor, arginine/serine-rich 2)	24	3	72	0.118227	0.0588235	0.0594031	1.00709	0	107
5051	P51114	8087	FXR1	FXR1	Fragile X mental retardation syndrome-related protein 1 (hFXR1p)	18	3	72	0.08867	0.0588235	0.0298464	0.592052	0	96
5276	O95456	8624	PSMG1	PSMG1	Proteasome assembly chaperone 1 (PAC-1) (Chromosome 21 leucine-rich protein) (C21-LRP) (Down syndrome critical region protein 2)	13	4	72	0.0640394	0.0784314	-0.014392	-0.292471	0	87
6813	Q13151	10949	HNRNPA0	ROA0	Heterogeneous nuclear ribonucleoprotein A0 (hnRNP A0)	19	3	72	0.0935961	0.0588235	0.0347725	0.670054	0	72
6955	O94905	11160	ERLIN2	ERLN2	Erlin-2 (Endoplasmic reticulum lipid raft-associated protein 2) (Stomatin-prohibitin-flotillin-HflC/K domain-containing protein 2) (SPFH domain-containing protein 2)	18	8	72	0.08867	0.156863	-0.0681928	-0.822986	0	103
7053	P26368	11338	U2AF2	U2AF2	Splicing factor U2AF 65 kDa subunit (U2 auxiliary factor 65 kDa subunit) (hU2AF(65)) (hU2AF65) (U2 snRNP auxiliary factor large subunit)	19	4	72	0.0935961	0.0784314	0.0151647	0.255017	0	99
8077	Q9HC35	27436	EML4	EMAL4	Echinoderm microtubule-associated protein-like 4 (EMAP-4) (Restrictedly overexpressed proliferation-associated protein) (Ropp 120)	26	3	72	0.128079	0.0588235	0.0692553	1.12257	0	140
8257	Q9P000	29099	COMMD9	COMD9	COMM domain-containing protein 9	10	1	72	0.0492611	0.0196078	0.0296532	1.32902	0	79
9939	Q6P9B6	57707	MEAK7	TLDC1	TLD domain-containing protein 1 (TBC/LysM-associated domain-containing protein 1)	25	2	72	0.123153	0.0392157	0.083937	1.65095	0	83
752	P19022	1000	CDH2	CADH2	Cadherin-2 (CDw325) (Neural cadherin) (N-cadherin) (CD antigen CD325)	33	5	71	0.162562	0.0980392	0.0645224	0.729555	0	346
804	P18754	1104	RCC1	RCC1	Regulator of chromosome condensation (Cell cycle regulatory protein) (Chromosome condensation protein 1)	23	3	71	0.1133	0.0588235	0.054477	0.945689	2	154
1605	P06241	2534	FYN	FYN	Tyrosine-protein kinase Fyn (EC 2.7.10.2) (Proto-oncogene Syn) (Proto-oncogene c-Fyn) (Src-like kinase) (SLK) (p59-Fyn)	37	2	71	0.182266	0.0392157	0.14305	2.21654	10	419
1717	O60547	2762	GMDS	GMDS	GDP-mannose 4,6 dehydratase (EC 4.2.1.47) (GDP-D-mannose dehydratase) (GMD)	16	8	71	0.0788177	0.156863	-0.078045	-0.992911	5	93
1763	P15586	2799	GNS	GNS	N-acetylglucosamine-6-sulfatase (EC 3.1.6.14) (Glucosamine-6-sulfatase) (G6S)	29	7	71	0.142857	0.137255	0.00560224	0.0577155	10	157
1906	P07305	3005	H1-0	H10	Histone H1.0 (Histone H1') (Histone H1(0)) [Cleaved into: Histone H1.0, N-terminally processed]	33	7	71	0.162562	0.137255	0.0253067	0.244129	0	299
1959	Q92769	3066	HDAC2	HDAC2	Histone deacetylase 2 (HD2) (EC 3.5.1.98)	20	1	71	0.0985222	0.0196078	0.0789143	2.32902	3	127
2245	P35858	3483	IGFALS	ALS	Insulin-like growth factor-binding protein complex acid labile subunit (ALS)	40	7	71	0.197044	0.137255	0.0597894	0.521663	6	457
2254	Q16270	3490	IGFBP7	IBP7	Insulin-like growth factor-binding protein 7 (IBP-7) (IGF-binding protein 7) (IGFBP-7) (IGFBP-rP1) (MAC25 protein) (PGI2-stimulating factor) (Prostacyclin-stimulating factor) (Tumor-derived adhesion factor) (TAF)	29	7	71	0.142857	0.137255	0.00560224	0.0577155	0	80
2395	P23458	3716	JAK1	JAK1	Tyrosine-protein kinase JAK1 (EC 2.7.10.2) (Janus kinase 1) (JAK-1)	28	6	71	0.137931	0.117647	0.020284	0.229482	10	419
2813	P05164	4353	MPO	PERM	Myeloperoxidase (MPO) (EC 1.11.2.2) [Cleaved into: Myeloperoxidase; 89 kDa myeloperoxidase; 84 kDa myeloperoxidase; Myeloperoxidase light chain; Myeloperoxidase heavy chain]	36	8	71	0.17734	0.156863	0.0204772	0.177014	0	244
3436	P27169	5444	PON1	PON1	Serum paraoxonase/arylesterase 1 (PON 1) (EC 3.1.1.2) (EC 3.1.1.81) (EC 3.1.8.1) (Aromatic esterase 1) (A-esterase 1) (K-45) (Serum aryldialkylphosphatase 1)	36	7	71	0.17734	0.137255	0.040085	0.36966	0	125
3497	P53041	5536	PPP5C	PPP5	Serine/threonine-protein phosphatase 5 (PP5) (EC 3.1.3.16) (Protein phosphatase T) (PP-T) (PPT)	21	5	71	0.103448	0.0980392	0.00540906	0.0774788	1	271
3732	P26022	5806	PTX3	PTX3	Pentraxin-related protein PTX3 (Pentaxin-related protein PTX3) (Tumor necrosis factor alpha-induced protein 5) (TNF alpha-induced protein 5) (Tumor necrosis factor-inducible gene 14 protein) (TSG-14)	27	6	71	0.133005	0.117647	0.0153579	0.177014	0	78
3764	P20336	5864	RAB3A	RAB3A	Ras-related protein Rab-3A	30	7	71	0.147783	0.137255	0.0105283	0.106625	0	170
3817	P52306	5910	RAP1GDS1	GDS1	Rap1 GTPase-GDP dissociation stimulator 1 (Exchange factor smgGDS) (SMG GDS protein) (SMG P21 stimulatory GDP/GTP exchange protein)	23	4	71	0.1133	0.0784314	0.0348691	0.530651	0	91
4108	Q9Y240	6320	CLEC11A	CLC11	C-type lectin domain family 11 member A (C-type lectin superfamily member 3) (Lymphocyte secreted C-type lectin) (Osteolectin) (Stem cell growth factor) (p47)	30	7	71	0.147783	0.137255	0.0105283	0.106625	0	342
4679	P11388	7153	TOP2A	TOP2A	DNA topoisomerase 2-alpha (EC 5.99.1.3) (DNA topoisomerase II, alpha isozyme)	26	3	71	0.128079	0.0588235	0.0692553	1.12257	13	115
4742	Q99598	7257	TSNAX	TSNAX	Translin-associated protein X (Translin-associated factor X)	18	4	71	0.08867	0.0784314	0.0102386	0.177014	0	76
5086	P41227	8260	NAA10	NAA10	N-alpha-acetyltransferase 10 (EC 2.3.1.255) (N-terminal acetyltransferase complex ARD1 subunit homolog A) (NatA catalytic subunit Naa10)	15	1	71	0.0738916	0.0196078	0.0542838	1.91398	4	109
5652	O95292	9217	VAPB	VAPB	Vesicle-associated membrane protein-associated protein B/C (VAMP-B/VAMP-C) (VAMP-associated protein B/C) (VAP-B/VAP-C)	18	8	71	0.08867	0.156863	-0.0681928	-0.822986	0	147
6160	O75674	10040	TOM1L1	TM1L1	TOM1-like protein 1 (Src-activating and signaling molecule protein) (Target of Myb-like protein 1)	21	2	71	0.103448	0.0392157	0.0642326	1.39941	0	169
6810	Q12874	10946	SF3A3	SF3A3	Splicing factor 3A subunit 3 (SF3a60) (Spliceosome-associated protein 61) (SAP 61)	19	4	71	0.0935961	0.0784314	0.0151647	0.255017	0	86
7488	P62166	23413	NCS1	NCS1	Neuronal calcium sensor 1 (NCS-1) (Frequenin homolog) (Frequenin-like protein) (Frequenin-like ubiquitous protein)	21	1	71	0.103448	0.0196078	0.0838404	2.39941	0	452
7682	Q13433	25800	SLC39A6	S39A6	Zinc transporter ZIP6 (Estrogen-regulated protein LIV-1) (Solute carrier family 39 member 6) (Zrt- and Irt-like protein 6) (ZIP-6)	24	3	71	0.118227	0.0588235	0.0594031	1.00709	0	185
7865	O76021	26156	RSL1D1	RL1D1	Ribosomal L1 domain-containing protein 1 (CATX-11) (Cellular senescence-inhibited gene protein) (Protein PBK1)	24	5	71	0.118227	0.0980392	0.0201874	0.270124	0	89
9208	Q96J84	55243	KIRREL1	KIRR1	Kin of IRRE-like protein 1 (Kin of irregular chiasm-like protein 1) (Nephrin-like protein 1)	24	4	71	0.118227	0.0784314	0.0397952	0.592052	0	100
9436	Q96KP1	55770	EXOC2	EXOC2	Exocyst complex component 2 (Exocyst complex component Sec5)	26	4	71	0.128079	0.0784314	0.0496474	0.707529	0	93
10674	Q9GZS3	80349	WDR61	WDR61	WD repeat-containing protein 61 (Meiotic recombination REC14 protein homolog) (SKI8 homolog) (Ski8) [Cleaved into: WD repeat-containing protein 61, N-terminally processed]	18	2	71	0.08867	0.0392157	0.0494543	1.17701	0	92
11448	Q9H9B4	94081	SFXN1	SFXN1	Sideroflexin-1 (Tricarboxylate carrier protein) (TCC)	18	9	71	0.08867	0.176471	-0.0878006	-0.992911	0	98
11531	Q96PD5	114770	PGLYRP2	PGRP2	N-acetylmuramoyl-L-alanine amidase (EC 3.5.1.28) (Peptidoglycan recognition protein 2) (Peptidoglycan recognition protein long) (PGRP-L)	39	8	71	0.192118	0.156863	0.0352555	0.292492	0	75
11568	Q6EMK4	114990	VASN	VASN	Vasorin (Protein slit-like 2)	44	4	71	0.216749	0.0784314	0.138317	1.46652	6	457
392	P56385	521	ATP5ME	ATP5I	ATP synthase subunit e, mitochondrial (ATPase subunit e) [Cleaved into: ATP synthase subunit e, mitochondrial, N-terminally processed]	8	5	70	0.0394089	0.0980392	-0.0586303	-1.31484	0	82
836	P12532	1159	CKMT1B	KCRU	Creatine kinase U-type, mitochondrial (EC 2.7.3.2) (Acidic-type mitochondrial creatine kinase) (Mia-CK) (Ubiquitous mitochondrial creatine kinase) (U-MtCK)	21	7	70	0.103448	0.137255	-0.0338066	-0.407948	0	230
892	P02462	1282	COL4A1	CO4A1	Collagen alpha-1(IV) chain [Cleaved into: Arresten]	17	3	70	0.0837438	0.0588235	0.0249203	0.50959	0	292
930	O15431	1317	SLC31A1	COPT1	High affinity copper uptake protein 1 (Copper transporter 1) (hCTR1) (Solute carrier family 31 member 1)	17	4	70	0.0837438	0.0784314	0.00531247	0.0945523	0	82
1266	P33316	1854	DUT	DUT	Deoxyuridine 5'-triphosphate nucleotidohydrolase, mitochondrial (dUTPase) (EC 3.6.1.23) (dUTP pyrophosphatase)	14	4	70	0.0689655	0.0784314	-0.00946586	-0.185556	0	82
1966	P06865	3073	HEXA	HEXA	Beta-hexosaminidase subunit alpha (EC 3.2.1.52) (Beta-N-acetylhexosaminidase subunit alpha) (Hexosaminidase subunit A) (N-acetyl-beta-glucosaminidase subunit alpha)	21	7	70	0.103448	0.137255	-0.0338066	-0.407948	1	164
2708	P49736	4171	MCM2	MCM2	DNA replication licensing factor MCM2 (EC 3.6.4.12) (Minichromosome maintenance protein 2 homolog) (Nuclear protein BM28)	18	4	70	0.08867	0.0784314	0.0102386	0.177014	0	181
2873	P15941	4582	MUC1	MUC1	Mucin-1 (MUC-1) (Breast carcinoma-associated antigen DF3) (Cancer antigen 15-3) (CA 15-3) (Carcinoma-associated mucin) (Episialin) (H23AG) (Krebs von den Lungen-6) (KL-6) (PEMT) (Peanut-reactive urinary mucin) (PUM) (Polymorphic epithelial mucin) (PEM) (Tumor-associated epithelial membrane antigen) (EMA) (Tumor-associated mucin) (CD antigen CD227) [Cleaved into: Mucin-1 subunit alpha (MUC1-NT) (M…	40	3	70	0.197044	0.0588235	0.138221	1.74406	0	91
2999	Q15843	4738	NEDD8	NEDD8	NEDD8 (Neddylin) (Neural precursor cell expressed developmentally down-regulated protein 8) (NEDD-8) (Ubiquitin-like protein Nedd8)	22	1	70	0.108374	0.0196078	0.0887665	2.46652	0	468
3109	P04181	4942	OAT	OAT	Ornithine aminotransferase, mitochondrial (EC 2.6.1.13) (Ornithine delta-aminotransferase) (Ornithine--oxo-acid aminotransferase) [Cleaved into: Ornithine aminotransferase, hepatic form; Ornithine aminotransferase, renal form]	20	7	70	0.0985222	0.137255	-0.0387327	-0.478337	19	93
4757	P02766	7276	TTR	TTHY	Transthyretin (ATTR) (Prealbumin) (TBPA)	34	7	70	0.167488	0.137255	0.0302328	0.287197	2	94
5129	Q02978	8402	SLC25A11	M2OM	Mitochondrial 2-oxoglutarate/malate carrier protein (OGCP) (Solute carrier family 25 member 11)	11	5	70	0.0541872	0.0980392	-0.043852	-0.855407	0	95
5565	O95832	9076	CLDN1	CLD1	Claudin-1 (Senescence-associated epithelial membrane protein)	22	2	70	0.108374	0.0392157	0.0691587	1.46652	0	77
6397	O75607	10360	NPM3	NPM3	Nucleoplasmin-3	7	1	70	0.0344828	0.0196078	0.0148749	0.814444	0	79
6537	Q92688	10541	ANP32B	AN32B	Acidic leucine-rich nuclear phosphoprotein 32 family member B (Acidic protein rich in leucines) (Putative HLA-DR-associated protein I-2) (PHAPI2) (Silver-stainable protein SSP29)	18	6	70	0.08867	0.117647	-0.0289771	-0.407948	0	134
6843	Q7L5N1	10980	COPS6	CSN6	COP9 signalosome complex subunit 6 (SGN6) (Signalosome subunit 6) (JAB1-containing signalosome subunit 6) (MOV34 homolog) (Vpr-interacting protein) (hVIP)	18	6	70	0.08867	0.117647	-0.0289771	-0.407948	0	304
7519	O95571	23474	ETHE1	ETHE1	Persulfide dioxygenase ETHE1, mitochondrial (EC 1.13.11.18) (Ethylmalonic encephalopathy protein 1) (Hepatoma subtracted clone one protein) (Sulfur dioxygenase ETHE1)	20	3	70	0.0985222	0.0588235	0.0396986	0.744055	4	145
8105	P01764	28442	IGHV3-23	HV323	Immunoglobulin heavy variable 3-23 (Ig heavy chain V-III region LAY) (Ig heavy chain V-III region POM) (Ig heavy chain V-III region TEI) (Ig heavy chain V-III region TIL) (Ig heavy chain V-III region TUR) (Ig heavy chain V-III region VH26) (Ig heavy chain V-III region WAS) (Ig heavy chain V-III region ZAP)	33	8	70	0.162562	0.156863	0.00569883	0.0514835	0	74
8449	Q71UM5	51065	RPS27L	RS27L	40S ribosomal protein S27-like (Small ribosomal subunit protein eS27-like)	10	4	70	0.0492611	0.0784314	-0.0291703	-0.670982	0	174
8626	Q9Y5K8	51382	ATP6V1D	VATD	V-type proton ATPase subunit D (V-ATPase subunit D) (V-ATPase 28 kDa accessory protein) (Vacuolar proton pump subunit D)	29	8	70	0.142857	0.156863	-0.0140056	-0.13493	0	94
9159	P57088	55161	TMEM33	TMM33	Transmembrane protein 33 (Protein DB83) (SHINC-3)	18	5	70	0.08867	0.0980392	-0.00936926	-0.144914	0	85
10175	Q9H9Q2	64708	COPS7B	CSN7B	COP9 signalosome complex subunit 7b (SGN7b) (Signalosome subunit 7b) (JAB1-containing signalosome subunit 7b)	10	3	70	0.0492611	0.0588235	-0.00956245	-0.255945	0	108
10508	Q8TBX8	79837	PIP4K2C	PI42C	Phosphatidylinositol 5-phosphate 4-kinase type-2 gamma (EC 2.7.1.149) (Phosphatidylinositol 5-phosphate 4-kinase type II gamma) (PI(5)P 4-kinase type II gamma) (PIP4KII-gamma)	29	6	70	0.142857	0.117647	0.0252101	0.280108	0	176
12864	Q6UWP8	374897	SBSN	SBSN	Suprabasin	25	5	70	0.123153	0.0980392	0.0251135	0.329018	0	73
530	P07358	732	C8B	CO8B	Complement component C8 beta chain (Complement component 8 subunit beta)	34	9	69	0.167488	0.176471	-0.0089829	-0.0753727	0	96
891	P02461	1281	COL3A1	CO3A1	Collagen alpha-1(III) chain	32	4	69	0.157635	0.0784314	0.0792041	1.00709	0	292
1711	P35754	2745	GLRX	GLRX1	Glutaredoxin-1 (Thioltransferase-1) (TTase-1)	21	5	69	0.103448	0.0980392	0.00540906	0.0774788	3	87
2994	P46934	4734	NEDD4	NEDD4	E3 ubiquitin-protein ligase NEDD4 (EC 2.3.2.26) (Cell proliferation-inducing gene 53 protein) (HECT-type E3 ubiquitin transferase NEDD4) (Neural precursor cell expressed developmentally down-regulated protein 4) (NEDD-4)	28	2	69	0.137931	0.0392157	0.0987153	1.81444	0	274
3134	P02763	5004	ORM1	A1AG1	Alpha-1-acid glycoprotein 1 (AGP 1) (Orosomucoid-1) (OMD 1)	26	10	69	0.128079	0.196078	-0.0679996	-0.614399	0	86
3913	P35244	6119	RPA3	RFA3	Replication protein A 14 kDa subunit (RP-A p14) (Replication factor A protein 3) (RF-A protein 3)	12	2	69	0.0591133	0.0392157	0.0198976	0.592052	0	81
4105	P29508	6317	SERPINB3	SPB3	Serpin B3 (Protein T4-A) (Squamous cell carcinoma antigen 1) (SCCA-1)	27	3	69	0.133005	0.0588235	0.0741814	1.17701	1	505
4236	P02730	6521	SLC4A1	B3AT	Band 3 anion transport protein (Anion exchange protein 1) (AE 1) (Anion exchanger 1) (Solute carrier family 4 member 1) (CD antigen CD233)	42	6	69	0.206897	0.117647	0.0892495	0.814444	0	253
4315	P61956	6613	SUMO2	SUMO2	Small ubiquitin-related modifier 2 (SUMO-2) (HSMT3) (SMT3 homolog 2) (SUMO-3) (Sentrin-2) (Ubiquitin-like protein SMT3B) (Smt3B)	14	1	69	0.0689655	0.0196078	0.0493577	1.81444	0	94
6683	O00187	10747	MASP2	MASP2	Mannan-binding lectin serine protease 2 (EC 3.4.21.104) (MBL-associated serine protease 2) (Mannose-binding protein-associated serine protease 2) (MASP-2) [Cleaved into: Mannan-binding lectin serine protease 2 A chain; Mannan-binding lectin serine protease 2 B chain]	40	6	69	0.197044	0.117647	0.0793973	0.744055	7	514
6852	Q16891	10989	IMMT	MIC60	MICOS complex subunit MIC60 (Cell proliferation-inducing gene 4/52 protein) (Mitochondrial inner membrane protein) (Mitofilin) (p87/89)	19	9	69	0.0935961	0.176471	-0.0828745	-0.914908	0	83
6878	Q13636	11031	RAB31	RAB31	Ras-related protein Rab-31 (Ras-related protein Rab-22B)	17	6	69	0.0837438	0.117647	-0.0339032	-0.49041	0	394
8363	Q8TCD5	30833	NT5C	NT5C	5'(3')-deoxyribonucleotidase, cytosolic type (EC 3.1.3.-) (Cytosolic 5',3'-pyrimidine nucleotidase) (Deoxy-5'-nucleotidase 1) (dNT-1)	26	4	69	0.128079	0.0784314	0.0496474	0.707529	0	85
9238	Q8IX04	55293	UEVLD	UEVLD	Ubiquitin-conjugating enzyme E2 variant 3 (UEV-3) (EV and lactate/malate dehydrogenase domain-containing protein)	37	3	69	0.182266	0.0588235	0.123442	1.63158	23	530
9522	Q9UNZ2	55968	NSFL1C	NSF1C	NSFL1 cofactor p47 (UBX domain-containing protein 2C) (p97 cofactor p47)	28	6	69	0.137931	0.117647	0.020284	0.229482	0	106
10121	Q96T76	64210	MMS19	MMS19	MMS19 nucleotide excision repair protein homolog (hMMS19) (MET18 homolog) (MMS19-like protein)	25	4	69	0.123153	0.0784314	0.0447213	0.650946	0	82
10810	Q9GZT3	81892	SLIRP	SLIRP	SRA stem-loop-interacting RNA-binding protein, mitochondrial	14	2	69	0.0689655	0.0392157	0.0297498	0.814444	2	346
11196	O60814	85236	H2BC12	H2B1K	Histone H2B type 1-K (H2B K) (HIRA-interacting protein 1)	35	2	69	0.172414	0.0392157	0.133198	2.13637	0	434
11466	O14950	103910	MYL12B	ML12B	Myosin regulatory light chain 12B (MLC-2A) (MLC-2) (Myosin regulatory light chain 2-B, smooth muscle isoform) (Myosin regulatory light chain 20 kDa) (MLC20) (Myosin regulatory light chain MRLC2) (SHUJUN-1)	28	7	69	0.137931	0.137255	0.000676133	0.00708942	0	452
11859	Q9NQE9	135114	HINT3	HINT3	Histidine triad nucleotide-binding protein 3 (HINT-3) (EC 3.-.-.-)	19	3	69	0.0935961	0.0588235	0.0347725	0.670054	0	75
12045	Q8IYI6	149371	EXOC8	EXOC8	Exocyst complex component 8 (Exocyst complex 84 kDa subunit)	23	5	69	0.1133	0.0980392	0.0152613	0.208723	0	82
968	P29373	1382	CRABP2	RABP2	Cellular retinoic acid-binding protein 2 (Cellular retinoic acid-binding protein II) (CRABP-II)	25	2	68	0.123153	0.0392157	0.083937	1.65095	0	283
1195	Q9UGM3	1755	DMBT1	DMBT1	Deleted in malignant brain tumors 1 protein (Glycoprotein 340) (Gp-340) (Hensin) (Salivary agglutinin) (SAG) (Surfactant pulmonary-associated D-binding protein)	23	7	68	0.1133	0.137255	-0.0239544	-0.276704	0	101
2466	P12035	3850	KRT3	K2C3	Keratin, type II cytoskeletal 3 (65 kDa cytokeratin) (Cytokeratin-3) (CK-3) (Keratin-3) (K3) (Type-II keratin Kb3)	23	6	68	0.1133	0.117647	-0.00434657	-0.0543111	0	121
2784	P55196	4301	AFDN	AFAD	Afadin (ALL1-fused gene from chromosome 6 protein) (Protein AF-6) (Afadin adherens junction formation factor)	27	3	68	0.133005	0.0588235	0.0741814	1.17701	0	99
3295	P08183	5243	ABCB1	MDR1	Multidrug resistance protein 1 (EC 3.6.3.44) (ATP-binding cassette sub-family B member 1) (P-glycoprotein 1) (CD antigen CD243)	29	5	68	0.142857	0.0980392	0.0448179	0.543142	15	248
4049	P62273	6235	RPS29	RS29	40S ribosomal protein S29 (Small ribosomal subunit protein uS14)	23	2	68	0.1133	0.0392157	0.0740848	1.53065	13	81
4342	Q13596	6642	SNX1	SNX1	Sorting nexin-1	24	3	68	0.118227	0.0588235	0.0594031	1.00709	0	206
4616	P52888	7064	THOP1	THOP1	Thimet oligopeptidase (EC 3.4.24.15) (Endopeptidase 24.15) (MP78)	22	8	68	0.108374	0.156863	-0.0484884	-0.533479	14	128
5344	O60869	8721	EDF1	EDF1	Endothelial differentiation-related factor 1 (EDF-1) (Multiprotein-bridging factor 1) (MBF1)	20	3	68	0.0985222	0.0588235	0.0396986	0.744055	0	78
6075	Q12768	9897	WASHC5	WASC5	WASH complex subunit 5 (Strumpellin) (WASH complex subunit strumpellin)	27	3	68	0.133005	0.0588235	0.0741814	1.17701	0	89
6817	Q15785	10953	TOMM34	TOM34	Mitochondrial import receptor subunit TOM34 (hTom34) (Translocase of outer membrane 34 kDa subunit)	22	4	68	0.108374	0.0784314	0.029943	0.466521	37	199
7013	O75935	11258	DCTN3	DCTN3	Dynactin subunit 3 (Dynactin complex subunit 22 kDa subunit) (p22)	8	3	68	0.0394089	0.0588235	-0.0194147	-0.577873	0	81
7082	O95757	22824	HSPA4L	HS74L	Heat shock 70 kDa protein 4L (Heat shock 70-related protein APG-1) (Osmotic stress protein 94)	26	7	68	0.128079	0.137255	-0.00917608	-0.0998258	40	568
7216	Q9UKE5	23043	TNIK	TNIK	TRAF2 and NCK-interacting protein kinase (EC 2.7.11.1)	32	2	68	0.157635	0.0392157	0.11842	2.00709	0	139
8658	Q9UHB6	51474	LIMA1	LIMA1	LIM domain and actin-binding protein 1 (Epithelial protein lost in neoplasm)	18	5	68	0.08867	0.0980392	-0.00936926	-0.144914	0	85
9274	Q9BTU6	55361	PI4K2A	P4K2A	Phosphatidylinositol 4-kinase type 2-alpha (EC 2.7.1.67) (Phosphatidylinositol 4-kinase type II-alpha)	32	2	68	0.157635	0.0392157	0.11842	2.00709	0	85
9701	Q9NQ88	57103	TIGAR	TIGAR	Fructose-2,6-bisphosphatase TIGAR (EC 3.1.3.46) (TP53-induced glycolysis and apoptosis regulator) (TP53-induced glycolysis regulatory phosphatase)	15	2	68	0.0738916	0.0392157	0.0346759	0.91398	7	94
12069	Q8N271	150696	PROM2	PROM2	Prominin-2 (PROM-2) (Prominin-like protein 2) (hPROML2)	36	3	68	0.17734	0.0588235	0.118516	1.59205	0	143
13150	A5A3E0	728378	POTEF	POTEF	POTE ankyrin domain family member F (ANKRD26-like family C member 1B) (Chimeric POTE-actin protein)	28	3	68	0.137931	0.0588235	0.0791075	1.22948	5	373
760	P55290	1012	CDH13	CAD13	Cadherin-13 (Heart cadherin) (H-cadherin) (P105) (Truncated cadherin) (T-cad) (T-cadherin)	30	7	67	0.147783	0.137255	0.0105283	0.106625	0	346
886	Q12860	1272	CNTN1	CNTN1	Contactin-1 (Glycoprotein gp135) (Neural cell surface protein F3)	40	7	67	0.197044	0.137255	0.0597894	0.521663	0	151
1321	Q14232	1967	EIF2B1	EI2BA	Translation initiation factor eIF-2B subunit alpha (eIF-2B GDP-GTP exchange factor subunit alpha)	19	2	67	0.0935961	0.0392157	0.0543804	1.25502	0	114
1544	P26885	2286	FKBP2	FKBP2	Peptidyl-prolyl cis-trans isomerase FKBP2 (PPIase FKBP2) (EC 5.2.1.8) (13 kDa FK506-binding protein) (13 kDa FKBP) (FKBP-13) (FK506-binding protein 2) (FKBP-2) (Immunophilin FKBP13) (Rotamase)	18	4	67	0.08867	0.0784314	0.0102386	0.177014	44	278
1596	P35637	2521	FUS	FUS	RNA-binding protein FUS (75 kDa DNA-pairing protein) (Oncogene FUS) (Oncogene TLS) (POMp75) (Translocated in liposarcoma protein)	23	3	67	0.1133	0.0588235	0.054477	0.945689	0	88
2157	P04196	3273	HRG	HRG	Histidine-rich glycoprotein (Histidine-proline-rich glycoprotein) (HPRG)	37	7	67	0.182266	0.137255	0.0450111	0.409188	0	81
2246	P18065	3485	IGFBP2	IBP2	Insulin-like growth factor-binding protein 2 (IBP-2) (IGF-binding protein 2) (IGFBP-2)	23	6	67	0.1133	0.117647	-0.00434657	-0.0543111	0	72
2364	P05107	3689	ITGB2	ITB2	Integrin beta-2 (Cell surface adhesion glycoproteins LFA-1/CR3/p150,95 subunit beta) (Complement receptor C3 subunit beta) (CD antigen CD18)	21	14	67	0.103448	0.27451	-0.171062	-1.40795	0	430
3194	P05154	5104	SERPINA5	IPSP	Plasma serine protease inhibitor (Acrosomal serine protease inhibitor) (Plasminogen activator inhibitor 3) (PAI-3) (PAI3) (Protein C inhibitor) (PCI) (Serpin A5)	34	7	67	0.167488	0.137255	0.0302328	0.287197	1	505
4691	P55327	7163	TPD52	TPD52	Tumor protein D52 (Protein N8)	14	2	67	0.0689655	0.0392157	0.0297498	0.814444	0	158
4988	Q13724	7841	MOGS	MOGS	Mannosyl-oligosaccharide glucosidase (EC 3.2.1.106) (Processing A-glucosidase I)	21	8	67	0.103448	0.156863	-0.0534145	-0.600593	0	77
5111	Q16777	8338	H2AC20	H2A2C	Histone H2A type 2-C (Histone H2A-GL101) (Histone H2A/q)	31	5	67	0.152709	0.0980392	0.0546701	0.639358	0	452
5324	Q13242	8683	SRSF9	SRSF9	Serine/arginine-rich splicing factor 9 (Pre-mRNA-splicing factor SRp30C) (Splicing factor, arginine/serine-rich 9)	18	2	67	0.08867	0.0392157	0.0494543	1.17701	2	346
6085	Q9UN86	9908	G3BP2	G3BP2	Ras GTPase-activating protein-binding protein 2 (G3BP-2) (GAP SH3 domain-binding protein 2)	24	5	67	0.118227	0.0980392	0.0201874	0.270124	0	141
6213	Q9Y5Y2	10101	NUBP2	NUBP2	Cytosolic Fe-S cluster assembly factor NUBP2 (Nucleotide-binding protein 2) (NBP 2)	14	1	67	0.0689655	0.0196078	0.0493577	1.81444	5	77
8436	Q86VN1	51028	VPS36	VPS36	Vacuolar protein-sorting-associated protein 36 (ELL-associated protein of 45 kDa) (ESCRT-II complex subunit VPS36)	35	3	67	0.172414	0.0588235	0.11359	1.55141	0	89
8713	Q9Y2X3	51602	NOP58	NOP58	Nucleolar protein 58 (Nucleolar protein 5)	22	2	67	0.108374	0.0392157	0.0691587	1.46652	0	124
9206	Q658P3	55240	STEAP3	STEA3	Metalloreductase STEAP3 (EC 1.16.1.-) (Dudulin-2) (Six-transmembrane epithelial antigen of prostate 3) (Tumor suppressor-activated pathway protein 6) (hTSAP6) (pHyde) (hpHyde)	27	2	67	0.133005	0.0392157	0.0937892	1.76198	0	127
9247	Q9NUU7	55308	DDX19A	DD19A	ATP-dependent RNA helicase DDX19A (EC 3.6.4.13) (DDX19-like protein) (DEAD box protein 19A)	20	3	67	0.0985222	0.0588235	0.0396986	0.744055	0	99
9477	Q8WUW1	55845	BRK1	BRK1	Protein BRICK1 (BRK1)	29	1	67	0.142857	0.0196078	0.123249	2.86507	0	80
10157	Q9NT62	64422	ATG3	ATG3	Ubiquitin-like-conjugating enzyme ATG3 (EC 6.3.2.-) (Autophagy-related protein 3) (APG3-like) (hApg3) (Protein PC3-96)	26	4	67	0.128079	0.0784314	0.0496474	0.707529	0	79
10673	Q13057	80347	COASY	COASY	Bifunctional coenzyme A synthase (CoA synthase) (NBP) (POV-2) [Includes: Phosphopantetheine adenylyltransferase (EC 2.7.7.3) (Dephospho-CoA pyrophosphorylase) (Pantetheine-phosphate adenylyltransferase) (PPAT); Dephospho-CoA kinase (DPCK) (EC 2.7.1.24) (Dephosphocoenzyme A kinase) (DPCOAK)]	23	6	67	0.1133	0.117647	-0.00434657	-0.0543111	2	77
11195	Q96KK5	85235	H2AC12	H2A1H	Histone H2A type 1-H (Histone H2A/s)	27	2	67	0.133005	0.0392157	0.0937892	1.76198	0	452
11472	Q96RF0	112574	SNX18	SNX18	Sorting nexin-18 (SH3 and PX domain-containing protein 3B) (Sorting nexin-associated Golgi protein 1)	39	2	67	0.192118	0.0392157	0.152903	2.29249	0	147
48	P11117	53	ACP2	PPAL	Lysosomal acid phosphatase (LAP) (EC 3.1.3.2)	35	5	66	0.172414	0.0980392	0.0743746	0.814444	0	106
125	P02771	174	AFP	FETA	Alpha-fetoprotein (Alpha-1-fetoprotein) (Alpha-fetoglobulin)	42	4	66	0.206897	0.0784314	0.128465	1.39941	0	417
160	P47895	220	ALDH1A3	AL1A3	Aldehyde dehydrogenase family 1 member A3 (EC 1.2.1.5) (Aldehyde dehydrogenase 6) (Retinaldehyde dehydrogenase 3) (RALDH-3) (RalDH3)	27	6	66	0.133005	0.117647	0.0153579	0.177014	54	361
409	Q15904	537	ATP6AP1	VAS1	V-type proton ATPase subunit S1 (V-ATPase subunit S1) (Protein XAP-3) (V-ATPase Ac45 subunit) (V-ATPase S1 accessory protein) (Vacuolar proton pump subunit S1)	27	3	66	0.133005	0.0588235	0.0741814	1.17701	0	82
684	P08571	929	CD14	CD14	Monocyte differentiation antigen CD14 (Myeloid cell-specific leucine-rich glycoprotein) (CD antigen CD14) [Cleaved into: Monocyte differentiation antigen CD14, urinary form; Monocyte differentiation antigen CD14, membrane-bound form]	30	5	66	0.147783	0.0980392	0.049744	0.592052	0	110
932	P10606	1329	COX5B	COX5B	Cytochrome c oxidase subunit 5B, mitochondrial (Cytochrome c oxidase polypeptide Vb)	15	4	66	0.0738916	0.0784314	-0.00453975	-0.08602	0	76
946	O75976	1362	CPD	CBPD	Carboxypeptidase D (EC 3.4.17.22) (Metallocarboxypeptidase D) (gp180)	32	3	66	0.157635	0.0588235	0.0988119	1.42213	0	245
949	O14493	1364	CLDN4	CLD4	Claudin-4 (Clostridium perfringens enterotoxin receptor) (CPE-R) (CPE-receptor) (Williams-Beuren syndrome chromosomal region 8 protein)	19	4	66	0.0935961	0.0784314	0.0151647	0.255017	0	125
2682	P46821	4131	MAP1B	MAP1B	Microtubule-associated protein 1B (MAP-1B) [Cleaved into: MAP1B heavy chain; MAP1 light chain LC1]	27	6	66	0.133005	0.117647	0.0153579	0.177014	0	105
2684	P27816	4134	MAP4	MAP4	Microtubule-associated protein 4 (MAP-4)	22	2	66	0.108374	0.0392157	0.0691587	1.46652	0	96
4129	P34741	6383	SDC2	SDC2	Syndecan-2 (SYND2) (Fibroglycan) (Heparan sulfate proteoglycan core protein) (HSPG) (CD antigen CD362)	26	6	66	0.128079	0.117647	0.0104318	0.122567	0	186
4843	P06132	7389	UROD	DCUP	Uroporphyrinogen decarboxylase (UPD) (URO-D) (EC 4.1.1.37)	27	6	66	0.133005	0.117647	0.0153579	0.177014	3	80
4998	P55145	7873	MANF	MANF	Mesencephalic astrocyte-derived neurotrophic factor (Arginine-rich protein) (Protein ARMET)	13	5	66	0.0640394	0.0980392	-0.0339998	-0.614399	0	82
5815	Q92530	9491	PSMF1	PSMF1	Proteasome inhibitor PI31 subunit (hPI31)	14	5	66	0.0689655	0.0980392	-0.0290737	-0.507484	0	74
6587	O95347	10592	SMC2	SMC2	Structural maintenance of chromosomes protein 2 (SMC protein 2) (SMC-2) (Chromosome-associated protein E) (hCAP-E) (XCAP-E homolog)	21	4	66	0.103448	0.0784314	0.0250169	0.399407	2	175
7294	Q92621	23165	NUP205	NU205	Nuclear pore complex protein Nup205 (205 kDa nucleoporin) (Nucleoporin Nup205)	16	2	66	0.0788177	0.0392157	0.039602	1.00709	0	79
7326	Q9NZB2	23196	FAM120A	F120A	Constitutive coactivator of PPAR-gamma-like protein 1 (Oxidative stress-associated Src activator) (Protein FAM120A)	25	3	66	0.123153	0.0588235	0.0643292	1.06598	0	88
7510	Q9UKU9	23452	ANGPTL2	ANGL2	Angiopoietin-related protein 2 (Angiopoietin-like protein 2)	35	3	66	0.172414	0.0588235	0.11359	1.55141	0	389
7855	Q9UGI8	26136	TES	TES	Testin (TESS)	25	4	66	0.123153	0.0784314	0.0447213	0.650946	0	84
8554	Q9NZD2	51228	GLTP	GLTP	Glycolipid transfer protein (GLTP)	13	4	66	0.0640394	0.0784314	-0.014392	-0.292471	0	81
9414	Q9NVD7	55742	PARVA	PARVA	Alpha-parvin (Actopaxin) (CH-ILKBP) (Calponin-like integrin-linked kinase-binding protein) (Matrix-remodeling-associated protein 2)	27	2	66	0.133005	0.0392157	0.0937892	1.76198	0	149
10776	Q9NQX7	81618	ITM2C	ITM2C	Integral membrane protein 2C (Cerebral protein 14) (Transmembrane protein BRI3) [Cleaved into: CT-BRI3]	17	3	66	0.0837438	0.0588235	0.0249203	0.50959	0	175
11164	Q8WUD1	84932	RAB2B	RAB2B	Ras-related protein Rab-2B	15	5	66	0.0738916	0.0980392	-0.0241476	-0.407948	0	533
12618	P25391	284217	LAMA1	LAMA1	Laminin subunit alpha-1 (Laminin A chain) (Laminin-1 subunit alpha) (Laminin-3 subunit alpha) (S-laminin subunit alpha) (S-LAM alpha)	13	3	66	0.0640394	0.0588235	0.00521588	0.122567	0	286
286	P36406	373	TRIM23	TRI23	E3 ubiquitin-protein ligase TRIM23 (EC 2.3.2.27) (ADP-ribosylation factor domain-containing protein 1) (GTP-binding protein ARD-1) (RING finger protein 46) (RING-type E3 ubiquitin transferase TRIM23) (Tripartite motif-containing protein 23)	6	3	65	0.0295567	0.0588235	-0.0292669	-0.992911	0	72
578	Q05682	800	CALD1	CALD1	Caldesmon (CDM)	24	9	65	0.118227	0.176471	-0.058244	-0.577873	0	71
1226	P16444	1800	DPEP1	DPEP1	Dipeptidase 1 (EC 3.4.13.19) (Dehydropeptidase-I) (Microsomal dipeptidase) (Renal dipeptidase) (hRDP)	31	7	65	0.152709	0.137255	0.0154545	0.153931	1	82
1447	P13726	2152	F3	TF	Tissue factor (TF) (Coagulation factor III) (Thromboplastin) (CD antigen CD142)	25	1	65	0.123153	0.0196078	0.103545	2.65095	0	88
2984	O75489	4722	NDUFS3	NDUS3	NADH dehydrogenase [ubiquinone] iron-sulfur protein 3, mitochondrial (EC 1.6.5.3) (EC 1.6.99.3) (Complex I-30kD) (CI-30kD) (NADH-ubiquinone oxidoreductase 30 kDa subunit)	13	10	65	0.0640394	0.196078	-0.132039	-1.6144	5	83
3359	P00750	5327	PLAT	TPA	Tissue-type plasminogen activator (t-PA) (t-plasminogen activator) (tPA) (EC 3.4.21.68) (Alteplase) (Reteplase) [Cleaved into: Tissue-type plasminogen activator chain A; Tissue-type plasminogen activator chain B]	26	4	65	0.128079	0.0784314	0.0496474	0.707529	7	514
3458	Q08752	5481	PPID	PPID	Peptidyl-prolyl cis-trans isomerase D (PPIase D) (EC 5.2.1.8) (40 kDa peptidyl-prolyl cis-trans isomerase) (Cyclophilin-40) (CYP-40) (Cyclophilin-related protein) (Rotamase D)	23	5	65	0.1133	0.0980392	0.0152613	0.208723	22	494
3523	P22694	5567	PRKACB	KAPCB	cAMP-dependent protein kinase catalytic subunit beta (PKA C-beta) (EC 2.7.11.11)	22	4	65	0.108374	0.0784314	0.029943	0.466521	0	158
3585	P07478	5645	PRSS2	TRY2	Trypsin-2 (EC 3.4.21.4) (Anionic trypsinogen) (Serine protease 2) (Trypsin II)	4	0	65	0.0197044	0	0.0197044	#DIV/0!	7	514
3595	Q16651	5652	PRSS8	PRSS8	Prostasin (EC 3.4.21.-) (Channel-activating protease 1) (CAP1) (Serine protease 8) [Cleaved into: Prostasin light chain; Prostasin heavy chain]	28	5	65	0.137931	0.0980392	0.0398918	0.492516	7	514
4667	Q03169	7127	TNFAIP2	TNAP2	Tumor necrosis factor alpha-induced protein 2 (TNF alpha-induced protein 2) (Primary response gene B94 protein)	26	3	65	0.128079	0.0588235	0.0692553	1.12257	0	120
5206	O14929	8520	HAT1	HAT1	Histone acetyltransferase type B catalytic subunit (EC 2.3.1.48) (Histone acetyltransferase 1)	15	3	65	0.0738916	0.0588235	0.0150681	0.329018	0	75
5630	Q92974	9181	ARHGEF2	ARHG2	Rho guanine nucleotide exchange factor 2 (Guanine nucleotide exchange factor H1) (GEF-H1) (Microtubule-regulated Rho-GEF) (Proliferating cell nucleolar antigen p40)	24	2	65	0.118227	0.0392157	0.0790109	1.59205	0	84
5867	P56134	9551	ATP5MF	ATPK	ATP synthase subunit f, mitochondrial	3	3	65	0.0147783	0.0588235	-0.0440452	-1.99291	0	76
6173	Q9UBT2	10054	UBA2	SAE2	SUMO-activating enzyme subunit 2 (EC 6.3.2.-) (Anthracycline-associated resistance ARX) (Ubiquitin-like 1-activating enzyme E1B) (Ubiquitin-like modifier-activating enzyme 2)	19	4	65	0.0935961	0.0784314	0.0151647	0.255017	0	375
6193	Q9Y625	10082	GPC6	GPC6	Glypican-6 [Cleaved into: Secreted glypican-6]	29	7	65	0.142857	0.137255	0.00560224	0.0577155	0	239
6293	O00148	10212	DDX39A	DX39A	ATP-dependent RNA helicase DDX39A (EC 3.6.4.13) (DEAD box protein 39) (Nuclear RNA helicase URH49)	25	9	65	0.123153	0.176471	-0.0533179	-0.518979	15	412
6421	P24844	10398	MYL9	MYL9	Myosin regulatory light polypeptide 9 (20 kDa myosin light chain) (LC20) (MLC-2C) (Myosin RLC) (Myosin regulatory light chain 2, smooth muscle isoform) (Myosin regulatory light chain 9) (Myosin regulatory light chain MRLC1)	18	7	65	0.08867	0.137255	-0.048585	-0.63034	0	452
6475	O43447	10465	PPIH	PPIH	Peptidyl-prolyl cis-trans isomerase H (PPIase H) (EC 5.2.1.8) (Rotamase H) (Small nuclear ribonucleoprotein particle-specific cyclophilin H) (CypH) (U-snRNP-associated cyclophilin SnuCyp-20) (USA-CYP)	14	2	65	0.0689655	0.0392157	0.0297498	0.814444	22	494
6919	Q9BUJ2	11100	HNRNPUL1	HNRL1	Heterogeneous nuclear ribonucleoprotein U-like protein 1 (Adenovirus early region 1B-associated protein 5) (E1B-55 kDa-associated protein 5) (E1B-AP5)	15	3	65	0.0738916	0.0588235	0.0150681	0.329018	0	81
7980	Q9H190	27111	SDCBP2	SDCB2	Syntenin-2 (Syndecan-binding protein 2)	23	5	65	0.1133	0.0980392	0.0152613	0.208723	0	391
9161	Q9NVS9	55163	PNPO	PNPO	Pyridoxine-5'-phosphate oxidase (EC 1.4.3.5) (Pyridoxamine-phosphate oxidase)	16	4	65	0.0788177	0.0784314	0.000386361	0.00708942	1	69
9343	Q96BY6	55619	DOCK10	DOC10	Dedicator of cytokinesis protein 10 (Zizimin-3)	23	5	65	0.1133	0.0980392	0.0152613	0.208723	0	165
9806	A0FGR8	57488	ESYT2	ESYT2	Extended synaptotagmin-2 (E-Syt2) (Chr2Syt)	17	6	65	0.0837438	0.117647	-0.0339032	-0.49041	0	159
10437	Q9HA64	79672	FN3KRP	KT3K	Ketosamine-3-kinase (EC 2.7.1.-) (Fructosamine-3-kinase-related protein) (FN3K-RP) (FN3K-related protein)	18	4	65	0.08867	0.0784314	0.0102386	0.177014	0	88
10668	Q6UXN9	80335	WDR82	WDR82	WD repeat-containing protein 82 (Protein TMEM113) (Swd2)	20	2	65	0.0985222	0.0392157	0.0593065	1.32902	0	69
10739	Q8TCT9	81502	HM13	HM13	Minor histocompatibility antigen H13 (EC 3.4.23.-) (Intramembrane protease 1) (IMP-1) (IMPAS-1) (hIMP1) (Presenilin-like protein 3) (Signal peptide peptidase)	17	5	65	0.0837438	0.0980392	-0.0142954	-0.227376	0	68
10914	Q9BY44	83939	EIF2A	EIF2A	Eukaryotic translation initiation factor 2A (eIF-2A) (65 kDa eukaryotic translation initiation factor 2A) [Cleaved into: Eukaryotic translation initiation factor 2A, N-terminally processed]	24	3	65	0.118227	0.0588235	0.0594031	1.00709	0	233
11247	Q96P63	89777	SERPINB12	SPB12	Serpin B12	23	2	65	0.1133	0.0392157	0.0740848	1.53065	1	505
12114	Q68D91	153364	MBLAC2	MBLC2	Metallo-beta-lactamase domain-containing protein 2 (EC 3.-.-.-)	28	2	65	0.137931	0.0392157	0.0987153	1.81444	4	145
12950	Q0VGL1	389541	LAMTOR4	LTOR4	Ragulator complex protein LAMTOR4 (Late endosomal/lysosomal adaptor and MAPK and MTOR activator 4) [Cleaved into: Ragulator complex protein LAMTOR4, N-terminally processed]	16	1	65	0.0788177	0.0196078	0.0592099	2.00709	0	70
902	P05997	1290	COL5A2	CO5A2	Collagen alpha-2(V) chain	20	7	64	0.0985222	0.137255	-0.0387327	-0.478337	0	69
1014	P19784	1459	CSNK2A2	CSK22	Casein kinase II subunit alpha' (CK II alpha') (EC 2.7.11.1)	24	6	64	0.118227	0.117647	0.000579542	0.00708942	0	199
1337	P78344	1982	EIF4G2	IF4G2	Eukaryotic translation initiation factor 4 gamma 2 (eIF-4-gamma 2) (eIF-4G 2) (eIF4G 2) (Death-associated protein 5) (DAP-5) (p97)	21	4	64	0.103448	0.0784314	0.0250169	0.399407	0	86
1396	P54753	2049	EPHB3	EPHB3	Ephrin type-B receptor 3 (EC 2.7.10.1) (EPH-like tyrosine kinase 2) (EPH-like kinase 2) (Embryonic kinase 2) (EK2) (hEK2) (Tyrosine-protein kinase TYRO6)	13	5	64	0.0640394	0.0980392	-0.0339998	-0.614399	10	419
1806	P22352	2878	GPX3	GPX3	Glutathione peroxidase 3 (GPx-3) (GSHPx-3) (EC 1.11.1.9) (Extracellular glutathione peroxidase) (Plasma glutathione peroxidase) (GPx-P) (GSHPx-P)	34	7	64	0.167488	0.137255	0.0302328	0.287197	2	224
2075	P01903	3122	HLA-DRA	DRA	HLA class II histocompatibility antigen, DR alpha chain (MHC class II antigen DRA)	26	8	64	0.128079	0.156863	-0.0287839	-0.292471	0	81
2100	P26583	3148	HMGB2	HMGB2	High mobility group protein B2 (High mobility group protein 2) (HMG-2)	25	6	64	0.123153	0.117647	0.00550565	0.0659831	0	182
2222	P50213	3419	IDH3A	IDH3A	Isocitrate dehydrogenase [NAD] subunit alpha, mitochondrial (EC 1.1.1.41) (Isocitric dehydrogenase subunit alpha) (NAD(+)-specific ICDH subunit alpha)	13	8	64	0.0640394	0.156863	-0.0928233	-1.29247	8	111
2230	P05156	3426	CFI	CFAI	Complement factor I (EC 3.4.21.45) (C3B/C4B inactivator) [Cleaved into: Complement factor I heavy chain; Complement factor I light chain]	27	6	64	0.133005	0.117647	0.0153579	0.177014	7	514
2527	Q13751	3914	LAMB3	LAMB3	Laminin subunit beta-3 (Epiligrin subunit bata) (Kalinin B1 chain) (Kalinin subunit beta) (Laminin B1k chain) (Laminin-5 subunit beta) (Nicein subunit beta)	18	1	64	0.08867	0.0196078	0.0690621	2.17701	0	241
3230	P11177	5162	PDHB	ODPB	Pyruvate dehydrogenase E1 component subunit beta, mitochondrial (PDHE1-B) (EC 1.2.4.1)	17	9	64	0.0837438	0.176471	-0.0927267	-1.07537	17	89
3348	P30613	5313	PKLR	KPYR	Pyruvate kinase PKLR (EC 2.7.1.40) (Pyruvate kinase 1) (Pyruvate kinase isozymes L/R) (R-type/L-type pyruvate kinase) (Red cell/liver pyruvate kinase)	26	10	64	0.128079	0.196078	-0.0679996	-0.614399	43	508
3428	P19388	5434	POLR2E	RPAB1	DNA-directed RNA polymerases I, II, and III subunit RPABC1 (RNA polymerases I, II, and III subunit ABC1) (DNA-directed RNA polymerase II 23 kDa polypeptide) (DNA-directed RNA polymerase II subunit E) (RPB5 homolog) (XAP4)	16	1	64	0.0788177	0.0196078	0.0592099	2.00709	0	74
3531	P17252	5578	PRKCA	KPCA	Protein kinase C alpha type (PKC-A) (PKC-alpha) (EC 2.7.11.13)	29	8	64	0.142857	0.156863	-0.0140056	-0.13493	0	209
4532	Q9BTW9	6904	TBCD	TBCD	Tubulin-specific chaperone D (Beta-tubulin cofactor D) (tfcD) (SSD-1) (Tubulin-folding cofactor D)	18	3	64	0.08867	0.0588235	0.0298464	0.592052	0	82
5606	Q92888	9138	ARHGEF1	ARHG1	Rho guanine nucleotide exchange factor 1 (115 kDa guanine nucleotide exchange factor) (p115-RhoGEF) (p115RhoGEF) (Sub1.5)	22	6	64	0.108374	0.117647	-0.00927267	-0.118441	0	127
6670	Q9Y666	10723	SLC12A7	S12A7	Solute carrier family 12 member 7 (Electroneutral potassium-chloride cotransporter 4) (K-Cl cotransporter 4)	18	1	64	0.08867	0.0196078	0.0690621	2.17701	7	343
7084	Q9UHX1	22827	PUF60	PUF60	Poly(U)-binding-splicing factor PUF60 (60 kDa poly(U)-binding-splicing factor) (FUSE-binding protein-interacting repressor) (FBP-interacting repressor) (Ro-binding protein 1) (RoBP1) (Siah-binding protein 1) (Siah-BP1)	14	5	64	0.0689655	0.0980392	-0.0290737	-0.507484	0	76
7467	O75044	23380	SRGAP2	SRGP2	SLIT-ROBO Rho GTPase-activating protein 2 (srGAP2) (Formin-binding protein 2) (Rho GTPase-activating protein 34)	25	4	64	0.123153	0.0784314	0.0447213	0.650946	0	92
7751	Q9H3S7	25930	PTPN23	PTN23	Tyrosine-protein phosphatase non-receptor type 23 (EC 3.1.3.48) (His domain-containing protein tyrosine phosphatase) (HD-PTP) (Protein tyrosine phosphatase TD14) (PTP-TD14)	33	2	64	0.162562	0.0392157	0.123346	2.05148	0	432
8186	P04433	28914	IGKV3-11	KV311	Immunoglobulin kappa variable 3-11 (Ig kappa chain V-III region VG)	38	5	64	0.187192	0.0980392	0.0891529	0.933089	0	64
8232	Q9BV86	28989	NTMT1	NTM1A	N-terminal Xaa-Pro-Lys N-methyltransferase 1 (EC 2.1.1.244) (Alpha N-terminal protein methyltransferase 1A) (Methyltransferase-like protein 11A) (N-terminal RCC1 methyltransferase) (X-Pro-Lys N-terminal protein methyltransferase 1A) (NTM1A) [Cleaved into: N-terminal Xaa-Pro-Lys N-methyltransferase 1, N-terminally processed]	19	2	64	0.0935961	0.0392157	0.0543804	1.25502	1	73
8611	Q9H2K8	51347	TAOK3	TAOK3	Serine/threonine-protein kinase TAO3 (EC 2.7.11.1) (Cutaneous T-cell lymphoma-associated antigen HD-CL-09) (CTCL-associated antigen HD-CL-09) (Dendritic cell-derived protein kinase) (JNK/SAPK-inhibitory kinase) (Jun kinase-inhibitory kinase) (Kinase from chicken homolog A) (hKFC-A) (Thousand and one amino acid protein 3)	38	4	64	0.187192	0.0784314	0.108761	1.25502	0	135
9691	Q6RW13	57085	AGTRAP	ATRAP	Type-1 angiotensin II receptor-associated protein (AT1 receptor-associated protein)	20	4	64	0.0985222	0.0784314	0.0200908	0.329018	0	67
9968	Q9Y5M8	58477	SRPRB	SRPRB	Signal recognition particle receptor subunit beta (SR-beta) (Protein APMCF1)	20	5	64	0.0985222	0.0980392	0.000482952	0.00708942	0	68
10701	Q9BT67	80762	NDFIP1	NFIP1	NEDD4 family-interacting protein 1 (Breast cancer-associated protein SGA-1M) (NEDD4 WW domain-binding protein 5) (Putative MAPK-activating protein PM13) (Putative NF-kappa-B-activating protein 164) (Putative NFKB and MAPK-activating protein)	12	1	64	0.0591133	0.0196078	0.0395055	1.59205	0	77
12722	Q86YS6	339122	RAB43	RAB43	Ras-related protein Rab-43 (Ras-related protein Rab-41)	20	4	64	0.0985222	0.0784314	0.0200908	0.329018	0	409
168	P05062	229	ALDOB	ALDOB	Fructose-bisphosphate aldolase B (EC 4.1.2.13) (Liver-type aldolase)	43	7	63	0.211823	0.137255	0.0745678	0.625999	2	484
388	P30049	513	ATP5F1D	ATPD	ATP synthase subunit delta, mitochondrial (F-ATPase delta subunit)	14	8	63	0.0689655	0.156863	-0.0878972	-1.18556	15	77
1070	Q9UBR2	1522	CTSZ	CATZ	Cathepsin Z (EC 3.4.18.1) (Cathepsin P) (Cathepsin X)	25	5	63	0.123153	0.0980392	0.0251135	0.329018	1	255
1274	P19971	1890	TYMP	TYPH	Thymidine phosphorylase (TP) (EC 2.4.2.4) (Gliostatin) (Platelet-derived endothelial cell growth factor) (PD-ECGF) (TdRPase)	16	8	63	0.0788177	0.156863	-0.078045	-0.992911	15	66
1658	P32455	2633	GBP1	GBP1	Guanylate-binding protein 1 (EC 3.6.5.-) (GTP-binding protein 1) (GBP-1) (HuGBP-1) (Guanine nucleotide-binding protein 1) (Interferon-induced guanylate-binding protein 1)	15	2	63	0.0738916	0.0392157	0.0346759	0.91398	0	161
2107	P17096	3159	HMGA1	HMGA1	High mobility group protein HMG-I/HMG-Y (HMG-I(Y)) (High mobility group AT-hook protein 1) (High mobility group protein A1) (High mobility group protein R)	30	4	63	0.147783	0.0784314	0.0693519	0.91398	0	67
2725	P21741	4192	MDK	MK	Midkine (MK) (Amphiregulin-associated protein) (ARAP) (Midgestation and kidney protein) (Neurite outgrowth-promoting factor 2) (Neurite outgrowth-promoting protein)	20	7	63	0.0985222	0.137255	-0.0387327	-0.478337	0	86
2828	P43246	4436	MSH2	MSH2	DNA mismatch repair protein Msh2 (hMSH2) (MutS protein homolog 2)	17	3	63	0.0837438	0.0588235	0.0249203	0.50959	2	89
3439	P16435	5447	POR	NCPR	NADPH--cytochrome P450 reductase (CPR) (P450R) (EC 1.6.2.4)	19	4	63	0.0935961	0.0784314	0.0151647	0.255017	3	107
3756	P11217	5837	PYGM	PYGM	Glycogen phosphorylase, muscle form (EC 2.4.1.1) (Myophosphorylase)	13	5	63	0.0640394	0.0980392	-0.0339998	-0.614399	11	286
4341	Q13884	6641	SNTB1	SNTB1	Beta-1-syntrophin (59 kDa dystrophin-associated protein A1 basic component 1) (DAPA1B) (BSYN2) (Syntrophin-2) (Tax interaction protein 43) (TIP-43)	15	3	63	0.0738916	0.0588235	0.0150681	0.329018	0	75
4973	Q9Y6M5	7779	SLC30A1	ZNT1	Zinc transporter 1 (ZnT-1) (Solute carrier family 30 member 1)	26	3	63	0.128079	0.0588235	0.0692553	1.12257	1	86
5311	O75822	8669	EIF3J	EIF3J	Eukaryotic translation initiation factor 3 subunit J (eIF3j) (Eukaryotic translation initiation factor 3 subunit 1) (eIF-3-alpha) (eIF3 p35)	17	6	63	0.0837438	0.117647	-0.0339032	-0.49041	0	73
5632	O43264	9183	ZW10	ZW10	Centromere/kinetochore protein zw10 homolog	9	3	63	0.044335	0.0588235	-0.0144886	-0.407948	0	81
5858	O15160	9533	POLR1C	RPAC1	DNA-directed RNA polymerases I and III subunit RPAC1 (DNA-directed RNA polymerase I subunit C) (RNA polymerases I and III subunit AC1) (AC40) (DNA-directed RNA polymerases I and III 40 kDa polypeptide) (RPA40) (RPA39) (RPC40)	18	1	63	0.08867	0.0196078	0.0690621	2.17701	49	91
6355	Q15459	10291	SF3A1	SF3A1	Splicing factor 3A subunit 1 (SF3a120) (Spliceosome-associated protein 114) (SAP 114)	23	3	63	0.1133	0.0588235	0.054477	0.945689	0	73
6479	O15212	10471	PFDN6	PFD6	Prefoldin subunit 6 (Protein Ke2)	20	1	63	0.0985222	0.0196078	0.0789143	2.32902	0	105
6816	P60468	10952	SEC61B	SC61B	Protein transport protein Sec61 subunit beta	11	5	63	0.0541872	0.0980392	-0.043852	-0.855407	0	77
6854	Q13435	10992	SF3B2	SF3B2	Splicing factor 3B subunit 2 (Pre-mRNA-splicing factor SF3b 145 kDa subunit) (SF3b145) (SF3b150) (Spliceosome-associated protein 145) (SAP 145)	17	2	63	0.0837438	0.0392157	0.0445282	1.09455	0	72
7520	Q15274	23475	QPRT	NADC	Nicotinate-nucleotide pyrophosphorylase [carboxylating] (EC 2.4.2.19) (Quinolinate phosphoribosyltransferase [decarboxylating]) (QAPRTase) (QPRTase)	26	6	63	0.128079	0.117647	0.0104318	0.122567	8	66
7591	Q9Y5Z4	23593	HEBP2	HEBP2	Heme-binding protein 2 (Placental protein 23) (PP23) (Protein SOUL)	31	2	63	0.152709	0.0392157	0.113494	1.96129	0	68
8034	P62310	27258	LSM3	LSM3	U6 snRNA-associated Sm-like protein LSm3	15	1	63	0.0738916	0.0196078	0.0542838	1.91398	0	65
8110	P01766	28449	IGHV3-13	HV313	Immunoglobulin heavy variable 3-13 (Ig heavy chain V-III region BRO)	35	6	63	0.172414	0.117647	0.0547667	0.55141	0	63
8486	Q8TC12	51109	RDH11	RDH11	Retinol dehydrogenase 11 (EC 1.1.1.300) (Androgen-regulated short-chain dehydrogenase/reductase 1) (HCV core-binding protein HCBP12) (Prostate short-chain dehydrogenase/reductase 1) (Retinal reductase 1) (RalR1) (Short chain dehydrogenase/reductase family 7C member 1)	26	5	63	0.128079	0.0980392	0.0300396	0.385601	9	300
8526	Q9UJW0	51164	DCTN4	DCTN4	Dynactin subunit 4 (Dyn4) (Dynactin subunit p62)	25	4	63	0.123153	0.0784314	0.0447213	0.650946	0	79
8634	Q9Y570	51400	PPME1	PPME1	Protein phosphatase methylesterase 1 (PME-1) (EC 3.1.1.89)	29	4	63	0.142857	0.0784314	0.0644258	0.86507	5	223
8953	Q14964	54734	RAB39A	RB39A	Ras-related protein Rab-39A (Rab-39)	5	5	63	0.0246305	0.0980392	-0.0734087	-1.99291	0	85
9004	Q6P1N0	54862	CC2D1A	C2D1A	Coiled-coil and C2 domain-containing protein 1A (Akt kinase-interacting protein 1) (Five prime repressor element under dual repression-binding protein 1) (FRE under dual repression-binding protein 1) (Freud-1) (Putative NF-kappa-B-activating protein 023N)	40	3	63	0.197044	0.0588235	0.138221	1.74406	0	86
9591	Q9P287	56647	BCCIP	BCCIP	BRCA2 and CDKN1A-interacting protein (P21- and CDK-associated protein 1) (Protein TOK-1)	17	2	63	0.0837438	0.0392157	0.0445282	1.09455	0	69
10018	Q9HB07	60314	MYG1	MYG1	UPF0160 protein MYG1, mitochondrial	20	3	63	0.0985222	0.0588235	0.0396986	0.744055	0	82
10743	Q9H2H9	81539	SLC38A1	S38A1	Sodium-coupled neutral amino acid transporter 1 (Amino acid transporter A1) (N-system amino acid transporter 2) (Solute carrier family 38 member 1) (System A amino acid transporter 1) (System N amino acid transporter 1)	26	2	63	0.128079	0.0392157	0.0888631	1.70753	2	217
72	Q03154	95	ACY1	ACY1	Aminoacylase-1 (ACY-1) (EC 3.5.1.14) (N-acyl-L-amino-acid amidohydrolase)	24	6	62	0.118227	0.117647	0.000579542	0.00708942	5	286
127	P35573	178	AGL	GDE	Glycogen debranching enzyme (Glycogen debrancher) [Includes: 4-alpha-glucanotransferase (EC 2.4.1.25) (Oligo-1,4-1,4-glucantransferase); Amylo-alpha-1,6-glucosidase (Amylo-1,6-glucosidase) (EC 3.2.1.33) (Dextrin 6-alpha-D-glucosidase)]	23	5	62	0.1133	0.0980392	0.0152613	0.208723	0	71
454	Q93088	635	BHMT	BHMT1	Betaine--homocysteine S-methyltransferase 1 (EC 2.1.1.5)	42	5	62	0.206897	0.0980392	0.108857	1.07748	2	86
1006	P48729	1452	CSNK1A1	KC1A	Casein kinase I isoform alpha (CKI-alpha) (EC 2.7.11.1) (CK1)	22	4	62	0.108374	0.0784314	0.029943	0.466521	0	128
1491	P09467	2203	FBP1	F16P1	Fructose-1,6-bisphosphatase 1 (FBPase 1) (EC 3.1.3.11) (D-fructose-1,6-bisphosphate 1-phosphohydrolase 1) (Liver FBPase)	28	8	62	0.137931	0.156863	-0.0189317	-0.185556	2	86
2672	P33908	4121	MAN1A1	MA1A1	Mannosyl-oligosaccharide 1,2-alpha-mannosidase IA (EC 3.2.1.113) (Man(9)-alpha-mannosidase) (Man9-mannosidase) (Mannosidase alpha class 1A member 1) (Processing alpha-1,2-mannosidase IA) (Alpha-1,2-mannosidase IA)	31	5	62	0.152709	0.0980392	0.0546701	0.639358	0	97
2694	O00339	4147	MATN2	MATN2	Matrilin-2	13	4	62	0.0640394	0.0784314	-0.014392	-0.292471	0	140
2726	P48163	4199	ME1	MAOX	NADP-dependent malic enzyme (NADP-ME) (EC 1.1.1.40) (Malic enzyme 1)	25	6	62	0.123153	0.117647	0.00550565	0.0659831	20	144
3637	P40306	5699	PSMB10	PSB10	Proteasome subunit beta type-10 (EC 3.4.25.1) (Low molecular mass protein 10) (Macropain subunit MECl-1) (Multicatalytic endopeptidase complex subunit MECl-1) (Proteasome MECl-1) (Proteasome subunit beta-2i)	12	2	62	0.0591133	0.0392157	0.0198976	0.592052	1	371
4327	P09661	6627	SNRPA1	RU2A	U2 small nuclear ribonucleoprotein A' (U2 snRNP A')	13	3	62	0.0640394	0.0588235	0.00521588	0.122567	6	457
4666	P05452	7123	CLEC3B	TETN	Tetranectin (TN) (C-type lectin domain family 3 member B) (Plasminogen kringle 4-binding protein)	35	7	62	0.172414	0.137255	0.0351589	0.329018	0	79
5010	P35659	7913	DEK	DEK	Protein DEK	23	2	62	0.1133	0.0392157	0.0740848	1.53065	0	75
[truncated: 15,320 more rows]
