# Supplementary material for: Extracellular Vesicle Proteomes Shed Light on the Evolutionary, Interactive, and Functional Divergence of Their Biogenesis Mechanisms
Source: Front Cell Dev Biol. 2021 Oct 1;9:734950. doi: 10.3389/fcell.2021.734950 (PMC8517337; doi:10.3389/fcell.2021.734950)
Supplement: Supplementary Table 3 — List of interacting protein pairs from integrating Affinity Purification-Mass Spectrometry (AP-MS; BioPlex) and Yeast Two-Hybrid (Y2H; HuRI) datasets, including table description and details of the table. [file Table_3.XLSX]

## Sheet: Table Detail
Supplementary Table 3
Table	Table title	Description	Column title	Details
3	List of interacting protein pairs from integrating Affinity purification-Mass Spectrometry (AP-MS; BioPlex) and Yeast Two-Hybrid (Y2H; HuRI) datasets.	Raw data used for Figure 3	Index	Row index
			Bait	NCBI gene ID of bait protein
			Prey	NCBI gene ID of prey protein
			Network source	Origin dataset from each protein-protein interaction

## Sheet: SupTable3
Supplementary Table 3. List of interacting protein pairs from integrating Affinity purification-Mass Spectrometry (AP-MS; BioPlex) and Yeast Two-Hybrid (Y2H; HuRI) datasets.
	NCBI Entrez ID
Index	Bait	Prey	Network source
1	100	728378	BioPlex_HEK293T
2	222389	6137	BioPlex_HEK293T
3	222389	5928	BioPlex_HEK293T
4	222389	25873	BioPlex_HEK293T
5	222389	6124	BioPlex_HEK293T
6	222389	6188	BioPlex_HEK293T
7	222389	708	BioPlex_HEK293T
8	222389	4038	BioPlex_HEK293T
9	222389	3836	BioPlex_HEK293T
10	645121	3312	BioPlex_HEK293T
11	645121	55132	BioPlex_HEK293T
12	645121	1020	BioPlex_HEK293T
13	945	201266	BioPlex_HEK293T
14	945	5824	BioPlex_HEK293T
15	945	808	BioPlex_HEK293T
16	945	23412	BioPlex_HEK293T
17	1819	3312	BioPlex_HEK293T
18	1819	51389	BioPlex_HEK293T
19	1819	5603	BioPlex_HEK293T
20	148109	7444	BioPlex_HEK293T
21	148109	821	BioPlex_HEK293T
22	148109	3309	BioPlex_HEK293T
23	148109	56928	BioPlex_HEK293T
24	148109	293	BioPlex_HEK293T
25	148109	9349	BioPlex_HEK293T
26	148109	7846	BioPlex_HEK293T
27	148109	84790	BioPlex_HEK293T
28	148109	6646	BioPlex_HEK293T
29	148109	158747	BioPlex_HEK293T
30	54363	8514	BioPlex_HEK293T
31	23640	3312	BioPlex_HEK293T
32	23640	728378	BioPlex_HEK293T
33	23640	26098	BioPlex_HEK293T
34	23640	22978	BioPlex_HEK293T
35	23640	1998	BioPlex_HEK293T
36	23313	10971	BioPlex_HEK293T
37	23313	7529	BioPlex_HEK293T
38	23313	2810	BioPlex_HEK293T
39	23313	7532	BioPlex_HEK293T
40	23313	7531	BioPlex_HEK293T
41	23313	7534	BioPlex_HEK293T
42	23313	7533	BioPlex_HEK293T
43	23313	51654	BioPlex_HEK293T
44	23313	55175	BioPlex_HEK293T
45	23313	10533	BioPlex_HEK293T
46	23313	7486	BioPlex_HEK293T
47	23313	22933	BioPlex_HEK293T
48	57805	3312	BioPlex_HEK293T
49	57805	8514	BioPlex_HEK293T
50	57805	54363	BioPlex_HEK293T
51	57805	9859	BioPlex_HEK293T
52	57805	10381	BioPlex_HEK293T
53	57805	347688	BioPlex_HEK293T
54	57805	4163	BioPlex_HEK293T
55	9926	728378	BioPlex_HEK293T
56	9926	345651	BioPlex_HEK293T
57	123355	3329	BioPlex_HEK293T
58	123355	664618	BioPlex_HEK293T
59	123355	3312	BioPlex_HEK293T
60	123355	3305	BioPlex_HEK293T
61	123355	8065	BioPlex_HEK293T
62	123355	10910	BioPlex_HEK293T
63	123355	55626	BioPlex_HEK293T
64	4109	2648	BioPlex_HEK293T
65	4109	8850	BioPlex_HEK293T
66	4109	10499	BioPlex_HEK293T
67	4109	57325	BioPlex_HEK293T
68	4109	55689	BioPlex_HEK293T
69	4109	728269	BioPlex_HEK293T
70	4109	728378	BioPlex_HEK293T
71	4109	60	BioPlex_HEK293T
72	4109	1523	BioPlex_HEK293T
73	4109	84250	BioPlex_HEK293T
74	4109	23133	BioPlex_HEK293T
75	4109	23314	BioPlex_HEK293T
76	4109	8204	BioPlex_HEK293T
77	4109	26009	BioPlex_HEK293T
78	4109	6191	BioPlex_HEK293T
79	4109	79832	BioPlex_HEK293T
80	4109	90459	BioPlex_HEK293T
81	4109	55048	BioPlex_HEK293T
82	4109	55810	BioPlex_HEK293T
83	4109	23481	BioPlex_HEK293T
84	4109	10474	BioPlex_HEK293T
85	4109	29902	BioPlex_HEK293T
86	4109	5585	BioPlex_HEK293T
87	4109	5451	BioPlex_HEK293T
88	4109	29903	BioPlex_HEK293T
89	4109	54535	BioPlex_HEK293T
90	4109	64784	BioPlex_HEK293T
91	4109	6944	BioPlex_HEK293T
92	5603	728378	BioPlex_HEK293T
93	10095	10109	BioPlex_HEK293T
94	10095	81873	BioPlex_HEK293T
95	10095	10092	BioPlex_HEK293T
96	10095	10097	BioPlex_HEK293T
97	10095	10094	BioPlex_HEK293T
98	10095	57180	BioPlex_HEK293T
99	10095	10096	BioPlex_HEK293T
100	10095	10093	BioPlex_HEK293T
101	10095	57645	BioPlex_HEK293T
102	10095	30833	BioPlex_HEK293T
103	5481	7389	BioPlex_HEK293T
104	152926	1629	BioPlex_HEK293T
105	152926	594	BioPlex_HEK293T
106	152926	593	BioPlex_HEK293T
107	23212	6181	BioPlex_HEK293T
108	23212	6176	BioPlex_HEK293T
109	23212	6124	BioPlex_HEK293T
110	23212	4691	BioPlex_HEK293T
111	23212	4904	BioPlex_HEK293T
112	23212	339230	BioPlex_HEK293T
113	23212	55131	BioPlex_HEK293T
114	23212	6130	BioPlex_HEK293T
115	23212	23451	BioPlex_HEK293T
116	23212	79050	BioPlex_HEK293T
117	23212	6189	BioPlex_HEK293T
118	23212	6208	BioPlex_HEK293T
119	23212	6204	BioPlex_HEK293T
120	23212	6187	BioPlex_HEK293T
121	23212	117246	BioPlex_HEK293T
122	23212	6188	BioPlex_HEK293T
123	23212	3609	BioPlex_HEK293T
124	23212	9188	BioPlex_HEK293T
125	23212	6175	BioPlex_HEK293T
126	23212	6122	BioPlex_HEK293T
127	23212	6733	BioPlex_HEK293T
128	23212	22907	BioPlex_HEK293T
129	23212	6128	BioPlex_HEK293T
130	23212	3008	BioPlex_HEK293T
131	23212	50809	BioPlex_HEK293T
132	23212	90957	BioPlex_HEK293T
133	23212	6217	BioPlex_HEK293T
134	23212	10514	BioPlex_HEK293T
135	23212	11338	BioPlex_HEK293T
136	23212	27350	BioPlex_HEK293T
137	23212	9904	BioPlex_HEK293T
138	23212	85437	BioPlex_HEK293T
139	23212	6141	BioPlex_HEK293T
140	23212	6132	BioPlex_HEK293T
141	23212	56829	BioPlex_HEK293T
142	23212	2926	BioPlex_HEK293T
143	23212	26156	BioPlex_HEK293T
144	23212	65993	BioPlex_HEK293T
145	23212	7818	BioPlex_HEK293T
146	23212	9045	BioPlex_HEK293T
147	23212	4869	BioPlex_HEK293T
148	23212	23560	BioPlex_HEK293T
149	23212	23076	BioPlex_HEK293T
150	23212	6194	BioPlex_HEK293T
151	23212	4839	BioPlex_HEK293T
152	23212	51081	BioPlex_HEK293T
153	23212	6224	BioPlex_HEK293T
154	23212	29997	BioPlex_HEK293T
155	23212	6223	BioPlex_HEK293T
156	23212	84365	BioPlex_HEK293T
157	23212	29777	BioPlex_HEK293T
158	23212	10240	BioPlex_HEK293T
159	23212	6209	BioPlex_HEK293T
160	23212	54865	BioPlex_HEK293T
161	23212	64965	BioPlex_HEK293T
162	23212	11103	BioPlex_HEK293T
163	23212	6202	BioPlex_HEK293T
164	23212	55299	BioPlex_HEK293T
165	23212	9790	BioPlex_HEK293T
166	23212	6160	BioPlex_HEK293T
167	23212	84450	BioPlex_HEK293T
168	23212	55646	BioPlex_HEK293T
169	23212	6139	BioPlex_HEK293T
170	23212	3921	BioPlex_HEK293T
171	23212	6138	BioPlex_HEK293T
172	23212	9933	BioPlex_HEK293T
173	23212	64318	BioPlex_HEK293T
174	23212	6147	BioPlex_HEK293T
175	23212	25873	BioPlex_HEK293T
176	23212	6207	BioPlex_HEK293T
177	23212	6234	BioPlex_HEK293T
178	23212	6161	BioPlex_HEK293T
179	23212	10412	BioPlex_HEK293T
180	23212	5937	BioPlex_HEK293T
181	23212	60488	BioPlex_HEK293T
182	23212	6203	BioPlex_HEK293T
183	23212	6222	BioPlex_HEK293T
184	23212	6218	BioPlex_HEK293T
185	23212	23521	BioPlex_HEK293T
186	23212	84248	BioPlex_HEK293T
187	23212	6142	BioPlex_HEK293T
188	23212	23029	BioPlex_HEK293T
189	23212	6168	BioPlex_HEK293T
190	23212	84154	BioPlex_HEK293T
191	23212	6137	BioPlex_HEK293T
192	23212	131405	BioPlex_HEK293T
193	23212	5936	BioPlex_HEK293T
194	23212	5814	BioPlex_HEK293T
195	23212	5813	BioPlex_HEK293T
196	23212	6230	BioPlex_HEK293T
197	23212	10262	BioPlex_HEK293T
198	23212	6429	BioPlex_HEK293T
199	23212	6430	BioPlex_HEK293T
200	23212	6431	BioPlex_HEK293T
201	23212	6780	BioPlex_HEK293T
202	23212	2733	BioPlex_HEK293T
203	23212	10667	BioPlex_HEK293T
204	23212	8575	BioPlex_HEK293T
205	23212	6229	BioPlex_HEK293T
206	23212	6158	BioPlex_HEK293T
207	23212	6156	BioPlex_HEK293T
208	23212	6193	BioPlex_HEK293T
209	23212	57466	BioPlex_HEK293T
210	23212	51388	BioPlex_HEK293T
211	23212	6135	BioPlex_HEK293T
212	23212	6428	BioPlex_HEK293T
213	23212	6164	BioPlex_HEK293T
214	23212	8338	BioPlex_HEK293T
215	23212	6165	BioPlex_HEK293T
216	23212	6426	BioPlex_HEK293T
217	23212	6231	BioPlex_HEK293T
218	23212	2197	BioPlex_HEK293T
219	23212	122704	BioPlex_HEK293T
220	8460	3309	BioPlex_HEK293T
221	7389	728378	BioPlex_HEK293T
222	22846	3312	BioPlex_HEK293T
223	10969	55646	BioPlex_HEK293T
224	10969	6124	BioPlex_HEK293T
225	10969	6135	BioPlex_HEK293T
226	10969	6175	BioPlex_HEK293T
227	10969	6122	BioPlex_HEK293T
228	10969	3024	BioPlex_HEK293T
229	10969	3008	BioPlex_HEK293T
230	10969	10514	BioPlex_HEK293T
231	10969	6154	BioPlex_HEK293T
232	10969	6141	BioPlex_HEK293T
233	10969	26156	BioPlex_HEK293T
234	10969	4869	BioPlex_HEK293T
235	10969	6132	BioPlex_HEK293T
236	10969	9188	BioPlex_HEK293T
237	10969	6202	BioPlex_HEK293T
238	10969	4839	BioPlex_HEK293T
239	10969	6139	BioPlex_HEK293T
240	10969	55299	BioPlex_HEK293T
241	10969	6138	BioPlex_HEK293T
242	10969	55131	BioPlex_HEK293T
243	10969	6158	BioPlex_HEK293T
244	10969	6203	BioPlex_HEK293T
245	10969	6142	BioPlex_HEK293T
246	10969	7169	BioPlex_HEK293T
247	10969	6130	BioPlex_HEK293T
248	10969	6137	BioPlex_HEK293T
249	10969	6430	BioPlex_HEK293T
250	10969	6429	BioPlex_HEK293T
251	10969	6157	BioPlex_HEK293T
252	10969	25873	BioPlex_HEK293T
253	10969	6156	BioPlex_HEK293T
254	10969	23521	BioPlex_HEK293T
255	83957	3312	BioPlex_HEK293T
256	140680	339457	BioPlex_HEK293T
257	3354	506	BioPlex_HEK293T
258	3623	3309	BioPlex_HEK293T
259	3623	2923	BioPlex_HEK293T
260	3623	811	BioPlex_HEK293T
261	3623	8517	BioPlex_HEK293T
262	4010	4081	BioPlex_HEK293T
263	4010	728378	BioPlex_HEK293T
264	4010	60	BioPlex_HEK293T
265	4010	63876	BioPlex_HEK293T
266	4010	25973	BioPlex_HEK293T
267	4010	8861	BioPlex_HEK293T
268	4010	5087	BioPlex_HEK293T
269	4010	5089	BioPlex_HEK293T
270	4010	5090	BioPlex_HEK293T
271	4010	4211	BioPlex_HEK293T
272	4010	4212	BioPlex_HEK293T
273	4010	23635	BioPlex_HEK293T
274	4010	170463	BioPlex_HEK293T
275	4010	23648	BioPlex_HEK293T
276	55998	3312	BioPlex_HEK293T
277	55998	345651	BioPlex_HEK293T
278	83879	7532	BioPlex_HEK293T
279	83879	7534	BioPlex_HEK293T
280	5426	5427	BioPlex_HEK293T
281	64091	287	BioPlex_HEK293T
282	64091	53373	BioPlex_HEK293T
283	64091	196527	BioPlex_HEK293T
284	64091	56996	BioPlex_HEK293T
285	64091	25807	BioPlex_HEK293T
286	64091	84230	BioPlex_HEK293T
287	84722	3275	BioPlex_HEK293T
288	8480	4928	BioPlex_HEK293T
289	8480	55109	BioPlex_HEK293T
290	8480	5558	BioPlex_HEK293T
291	8480	11097	BioPlex_HEK293T
292	8480	701	BioPlex_HEK293T
293	8480	5557	BioPlex_HEK293T
294	79608	5245	BioPlex_HEK293T
295	79608	11160	BioPlex_HEK293T
296	79608	54892	BioPlex_HEK293T
297	79608	55735	BioPlex_HEK293T
298	79608	23310	BioPlex_HEK293T
299	79608	23326	BioPlex_HEK293T
300	79608	3156	BioPlex_HEK293T
301	79608	11331	BioPlex_HEK293T
302	79608	64924	BioPlex_HEK293T
303	79608	55005	BioPlex_HEK293T
304	79608	202018	BioPlex_HEK293T
305	79608	29781	BioPlex_HEK293T
306	79608	83590	BioPlex_HEK293T
307	79608	987	BioPlex_HEK293T
308	79608	55676	BioPlex_HEK293T
309	79608	10079	BioPlex_HEK293T
310	57007	506	BioPlex_HEK293T
311	57007	498	BioPlex_HEK293T
312	57007	513	BioPlex_HEK293T
313	57007	539	BioPlex_HEK293T
314	83942	3312	BioPlex_HEK293T
315	83942	22994	BioPlex_HEK293T
316	83942	10243	BioPlex_HEK293T
317	83942	131544	BioPlex_HEK293T
318	83942	26130	BioPlex_HEK293T
319	83942	28966	BioPlex_HEK293T
320	64854	23239	BioPlex_HEK293T
321	64854	91833	BioPlex_HEK293T
322	64854	1762	BioPlex_HEK293T
323	64854	57599	BioPlex_HEK293T
324	64854	58533	BioPlex_HEK293T
325	64854	6643	BioPlex_HEK293T
326	64854	23035	BioPlex_HEK293T
327	30813	1459	BioPlex_HEK293T
328	30813	1457	BioPlex_HEK293T
329	30813	1460	BioPlex_HEK293T
330	30813	219333	BioPlex_HEK293T
331	30813	8338	BioPlex_HEK293T
332	54543	279	BioPlex_HEK293T
333	54543	84134	BioPlex_HEK293T
334	521	93974	BioPlex_HEK293T
335	521	509	BioPlex_HEK293T
336	521	506	BioPlex_HEK293T
337	521	10476	BioPlex_HEK293T
338	521	513	BioPlex_HEK293T
339	521	498	BioPlex_HEK293T
340	521	515	BioPlex_HEK293T
341	521	54943	BioPlex_HEK293T
342	521	522	BioPlex_HEK293T
343	521	10560	BioPlex_HEK293T
344	521	10632	BioPlex_HEK293T
345	521	539	BioPlex_HEK293T
346	521	29956	BioPlex_HEK293T
347	521	4509	BioPlex_HEK293T
348	4502	5357	BioPlex_HEK293T
349	4502	9317	BioPlex_HEK293T
350	4502	56110	BioPlex_HEK293T
351	100272147	2671	BioPlex_HEK293T
352	10230	10531	BioPlex_HEK293T
353	10230	51291	BioPlex_HEK293T
354	10230	192670	BioPlex_HEK293T
355	4694	4707	BioPlex_HEK293T
356	4694	4729	BioPlex_HEK293T
357	4694	4731	BioPlex_HEK293T
358	4694	4538	BioPlex_HEK293T
359	4694	4701	BioPlex_HEK293T
360	4694	4715	BioPlex_HEK293T
361	4694	4696	BioPlex_HEK293T
362	4694	4714	BioPlex_HEK293T
363	4694	4724	BioPlex_HEK293T
364	4694	4704	BioPlex_HEK293T
365	4694	55967	BioPlex_HEK293T
366	4694	4723	BioPlex_HEK293T
367	4694	4709	BioPlex_HEK293T
368	4694	4718	BioPlex_HEK293T
369	4694	4540	BioPlex_HEK293T
370	4694	4726	BioPlex_HEK293T
371	4694	4712	BioPlex_HEK293T
372	4694	4711	BioPlex_HEK293T
373	55505	92345	BioPlex_HEK293T
374	55505	4904	BioPlex_HEK293T
375	55505	26094	BioPlex_HEK293T
376	55505	1736	BioPlex_HEK293T
377	55505	10514	BioPlex_HEK293T
378	55505	55135	BioPlex_HEK293T
379	55505	6426	BioPlex_HEK293T
380	55505	6223	BioPlex_HEK293T
381	55505	3836	BioPlex_HEK293T
382	55505	54433	BioPlex_HEK293T
383	55505	55164	BioPlex_HEK293T
384	55505	11103	BioPlex_HEK293T
385	55505	6625	BioPlex_HEK293T
386	55505	49860	BioPlex_HEK293T
387	4946	7532	BioPlex_HEK293T
388	4946	59	BioPlex_HEK293T
389	4946	3934	BioPlex_HEK293T
390	5441	5436	BioPlex_HEK293T
391	5441	171568	BioPlex_HEK293T
392	5441	26015	BioPlex_HEK293T
393	5441	64425	BioPlex_HEK293T
394	5441	84172	BioPlex_HEK293T
395	5441	5271	BioPlex_HEK293T
396	5441	8710	BioPlex_HEK293T
397	5441	25885	BioPlex_HEK293T
398	5441	11128	BioPlex_HEK293T
399	5441	1828	BioPlex_HEK293T
400	5441	79871	BioPlex_HEK293T
401	5441	3034	BioPlex_HEK293T
402	5441	55718	BioPlex_HEK293T
403	5441	55703	BioPlex_HEK293T
404	5441	5430	BioPlex_HEK293T
405	5441	81488	BioPlex_HEK293T
406	5441	10623	BioPlex_HEK293T
407	5441	5433	BioPlex_HEK293T
408	5441	58490	BioPlex_HEK293T
409	5441	55197	BioPlex_HEK293T
410	5441	6830	BioPlex_HEK293T
411	5441	89777	BioPlex_HEK293T
412	5441	23248	BioPlex_HEK293T
413	5441	5431	BioPlex_HEK293T
414	5441	27297	BioPlex_HEK293T
415	5441	91433	BioPlex_HEK293T
416	5441	661	BioPlex_HEK293T
417	5441	54700	BioPlex_HEK293T
418	5441	9400	BioPlex_HEK293T
419	5441	5437	BioPlex_HEK293T
420	5441	383	BioPlex_HEK293T
421	5441	11321	BioPlex_HEK293T
422	5441	221830	BioPlex_HEK293T
423	5441	5439	BioPlex_HEK293T
424	5441	7053	BioPlex_HEK293T
425	5441	9533	BioPlex_HEK293T
426	5441	79983	BioPlex_HEK293T
427	5441	5438	BioPlex_HEK293T
428	5441	5434	BioPlex_HEK293T
429	5441	10622	BioPlex_HEK293T
430	5441	10621	BioPlex_HEK293T
431	5441	5317	BioPlex_HEK293T
432	5441	10849	BioPlex_HEK293T
433	5441	51200	BioPlex_HEK293T
434	5441	121214	BioPlex_HEK293T
435	5441	5432	BioPlex_HEK293T
436	5441	51184	BioPlex_HEK293T
437	5441	242	BioPlex_HEK293T
438	5441	84265	BioPlex_HEK293T
439	5441	145264	BioPlex_HEK293T
440	5441	1041	BioPlex_HEK293T
441	5441	79887	BioPlex_HEK293T
442	5441	5275	BioPlex_HEK293T
443	5441	5055	BioPlex_HEK293T
444	5441	342897	BioPlex_HEK293T
445	5441	54707	BioPlex_HEK293T
446	5441	9150	BioPlex_HEK293T
447	5441	51082	BioPlex_HEK293T
448	5441	5435	BioPlex_HEK293T
449	5441	51728	BioPlex_HEK293T
450	5441	11060	BioPlex_HEK293T
451	6227	283458	BioPlex_HEK293T
452	6227	3921	BioPlex_HEK293T
453	6234	6188	BioPlex_HEK293T
454	6234	79896	BioPlex_HEK293T
455	6234	6160	BioPlex_HEK293T
456	6234	6143	BioPlex_HEK293T
457	155370	80380	BioPlex_HEK293T
458	9403	7276	BioPlex_HEK293T
459	9403	8710	BioPlex_HEK293T
460	9403	383	BioPlex_HEK293T
461	9403	145264	BioPlex_HEK293T
462	9403	51200	BioPlex_HEK293T
463	9403	121214	BioPlex_HEK293T
464	9403	5055	BioPlex_HEK293T
465	9403	5271	BioPlex_HEK293T
466	9403	79887	BioPlex_HEK293T
467	9403	5265	BioPlex_HEK293T
468	9403	3043	BioPlex_HEK293T
469	6767	4753	BioPlex_HEK293T
470	29796	7381	BioPlex_HEK293T
471	29796	7385	BioPlex_HEK293T
472	29796	9167	BioPlex_HEK293T
473	29796	7386	BioPlex_HEK293T
474	29796	1537	BioPlex_HEK293T
475	29796	7384	BioPlex_HEK293T
476	29796	80142	BioPlex_HEK293T
477	29796	27089	BioPlex_HEK293T
478	29796	23456	BioPlex_HEK293T
479	29796	4519	BioPlex_HEK293T
480	29796	7388	BioPlex_HEK293T
481	29796	1340	BioPlex_HEK293T
482	29796	7105	BioPlex_HEK293T
483	84833	5824	BioPlex_HEK293T
484	404550	5533	BioPlex_HEK293T
485	404550	10444	BioPlex_HEK293T
486	404550	27252	BioPlex_HEK293T
487	404550	84890	BioPlex_HEK293T
488	10063	54902	BioPlex_HEK293T
489	10063	6821	BioPlex_HEK293T
490	1350	1345	BioPlex_HEK293T
491	1350	7385	BioPlex_HEK293T
492	1350	9167	BioPlex_HEK293T
493	1350	1327	BioPlex_HEK293T
494	1350	399687	BioPlex_HEK293T
495	1350	7009	BioPlex_HEK293T
496	1350	1329	BioPlex_HEK293T
497	1350	1340	BioPlex_HEK293T
498	1350	4513	BioPlex_HEK293T
499	1350	7381	BioPlex_HEK293T
500	1350	4512	BioPlex_HEK293T
501	245909	1474	BioPlex_HEK293T
502	245909	8710	BioPlex_HEK293T
503	245909	7051	BioPlex_HEK293T
504	245909	78991	BioPlex_HEK293T
505	245909	1515	BioPlex_HEK293T
506	245909	55831	BioPlex_HEK293T
507	245909	84659	BioPlex_HEK293T
508	245909	79983	BioPlex_HEK293T
509	245909	23670	BioPlex_HEK293T
510	245909	242	BioPlex_HEK293T
511	245909	1041	BioPlex_HEK293T
512	245909	27178	BioPlex_HEK293T
513	245909	56851	BioPlex_HEK293T
514	245909	51234	BioPlex_HEK293T
515	245909	23491	BioPlex_HEK293T
516	245909	10328	BioPlex_HEK293T
517	245936	5203	BioPlex_HEK293T
518	245936	5202	BioPlex_HEK293T
519	245936	9254	BioPlex_HEK293T
520	245936	781	BioPlex_HEK293T
521	245936	5201	BioPlex_HEK293T
522	245936	6653	BioPlex_HEK293T
523	245936	7411	BioPlex_HEK293T
524	245936	5204	BioPlex_HEK293T
525	245936	1292	BioPlex_HEK293T
526	245936	10471	BioPlex_HEK293T
527	245936	91147	BioPlex_HEK293T
528	245936	3949	BioPlex_HEK293T
529	245936	53353	BioPlex_HEK293T
530	245936	1486	BioPlex_HEK293T
531	245936	4038	BioPlex_HEK293T
532	54065	203547	BioPlex_HEK293T
533	54065	506	BioPlex_HEK293T
534	54065	80727	BioPlex_HEK293T
535	2790	2784	BioPlex_HEK293T
536	2790	2782	BioPlex_HEK293T
537	2790	2783	BioPlex_HEK293T
538	2790	59345	BioPlex_HEK293T
539	2790	2778	BioPlex_HEK293T
540	2790	2773	BioPlex_HEK293T
541	2790	2775	BioPlex_HEK293T
542	2790	2770	BioPlex_HEK293T
543	2790	2781	BioPlex_HEK293T
544	2790	2767	BioPlex_HEK293T
545	2790	2776	BioPlex_HEK293T
546	2790	10672	BioPlex_HEK293T
547	2790	5082	BioPlex_HEK293T
548	2787	2778	BioPlex_HEK293T
549	2787	2773	BioPlex_HEK293T
550	2787	2770	BioPlex_HEK293T
551	2787	2776	BioPlex_HEK293T
552	2787	10672	BioPlex_HEK293T
553	2787	138199	BioPlex_HEK293T
554	2787	5082	BioPlex_HEK293T
555	2787	2782	BioPlex_HEK293T
556	2787	59345	BioPlex_HEK293T
557	2787	2783	BioPlex_HEK293T
558	2787	10681	BioPlex_HEK293T
559	55891	55131	BioPlex_HEK293T
560	55891	9555	BioPlex_HEK293T
561	55891	3007	BioPlex_HEK293T
562	55891	3006	BioPlex_HEK293T
563	55891	3024	BioPlex_HEK293T
564	55891	201161	BioPlex_HEK293T
565	55891	64802	BioPlex_HEK293T
566	55891	168850	BioPlex_HEK293T
567	55891	135295	BioPlex_HEK293T
568	9553	4904	BioPlex_HEK293T
569	9553	6182	BioPlex_HEK293T
570	9553	84311	BioPlex_HEK293T
571	9553	65005	BioPlex_HEK293T
572	9553	54148	BioPlex_HEK293T
573	9553	124995	BioPlex_HEK293T
574	9553	79590	BioPlex_HEK293T
575	9553	54534	BioPlex_HEK293T
576	9553	29093	BioPlex_HEK293T
577	9553	51264	BioPlex_HEK293T
578	9553	57129	BioPlex_HEK293T
579	9553	3396	BioPlex_HEK293T
580	9553	51069	BioPlex_HEK293T
581	9553	28998	BioPlex_HEK293T
582	9553	51073	BioPlex_HEK293T
583	9553	51318	BioPlex_HEK293T
584	9553	51263	BioPlex_HEK293T
585	9553	55168	BioPlex_HEK293T
586	9553	28977	BioPlex_HEK293T
587	9553	55052	BioPlex_HEK293T
588	9553	29074	BioPlex_HEK293T
589	9553	10884	BioPlex_HEK293T
590	9553	6150	BioPlex_HEK293T
591	9553	51258	BioPlex_HEK293T
592	25847	8881	BioPlex_HEK293T
593	25847	119504	BioPlex_HEK293T
594	25847	29945	BioPlex_HEK293T
595	25847	64682	BioPlex_HEK293T
596	25847	8697	BioPlex_HEK293T
597	25847	51343	BioPlex_HEK293T
598	25847	29882	BioPlex_HEK293T
599	25847	246184	BioPlex_HEK293T
600	25847	26271	BioPlex_HEK293T
601	25847	10393	BioPlex_HEK293T
602	25847	51433	BioPlex_HEK293T
603	25847	996	BioPlex_HEK293T
604	25847	51434	BioPlex_HEK293T
605	8992	203547	BioPlex_HEK293T
606	8992	23545	BioPlex_HEK293T
607	8992	535	BioPlex_HEK293T
608	8992	10159	BioPlex_HEK293T
609	8992	7905	BioPlex_HEK293T
610	8992	54872	BioPlex_HEK293T
611	8992	6542	BioPlex_HEK293T
612	8992	537	BioPlex_HEK293T
613	8992	147007	BioPlex_HEK293T
614	8992	5792	BioPlex_HEK293T
615	8992	84317	BioPlex_HEK293T
616	2785	2781	BioPlex_HEK293T
617	2785	2767	BioPlex_HEK293T
618	2785	2776	BioPlex_HEK293T
619	2785	10672	BioPlex_HEK293T
620	2785	2782	BioPlex_HEK293T
621	2785	59345	BioPlex_HEK293T
622	2785	2318	BioPlex_HEK293T
623	2785	2771	BioPlex_HEK293T
624	2785	2775	BioPlex_HEK293T
625	2785	2780	BioPlex_HEK293T
626	2785	2778	BioPlex_HEK293T
627	2785	2770	BioPlex_HEK293T
628	2785	5082	BioPlex_HEK293T
629	2786	59345	BioPlex_HEK293T
630	2786	2778	BioPlex_HEK293T
631	2786	2771	BioPlex_HEK293T
632	2786	2773	BioPlex_HEK293T
633	2786	2770	BioPlex_HEK293T
634	2786	2776	BioPlex_HEK293T
635	2786	10672	BioPlex_HEK293T
636	2786	5082	BioPlex_HEK293T
637	2786	158747	BioPlex_HEK293T
638	2786	79734	BioPlex_HEK293T
639	8970	2266	BioPlex_HEK293T
640	8970	2244	BioPlex_HEK293T
641	8970	2243	BioPlex_HEK293T
642	8970	84196	BioPlex_HEK293T
643	8970	3043	BioPlex_HEK293T
644	8970	4193	BioPlex_HEK293T
645	51124	54832	BioPlex_HEK293T
646	11157	57819	BioPlex_HEK293T
647	11157	25804	BioPlex_HEK293T
648	11157	51691	BioPlex_HEK293T
649	11157	9129	BioPlex_HEK293T
650	11157	10419	BioPlex_HEK293T
651	11157	64852	BioPlex_HEK293T
652	11157	9128	BioPlex_HEK293T
653	11157	83732	BioPlex_HEK293T
654	11157	9733	BioPlex_HEK293T
655	11157	26121	BioPlex_HEK293T
656	11157	56257	BioPlex_HEK293T
657	11157	219988	BioPlex_HEK293T
658	11157	79084	BioPlex_HEK293T
659	11157	9465	BioPlex_HEK293T
660	11157	11193	BioPlex_HEK293T
661	11157	23658	BioPlex_HEK293T
662	11157	6633	BioPlex_HEK293T
663	11157	1207	BioPlex_HEK293T
664	11157	55352	BioPlex_HEK293T
665	11157	27257	BioPlex_HEK293T
666	11157	51690	BioPlex_HEK293T
667	11157	6635	BioPlex_HEK293T
668	11157	84967	BioPlex_HEK293T
669	11157	6632	BioPlex_HEK293T
670	11157	27258	BioPlex_HEK293T
671	11157	8487	BioPlex_HEK293T
672	11157	118472	BioPlex_HEK293T
673	55090	9482	BioPlex_HEK293T
674	440145	10844	BioPlex_HEK293T
675	440145	5116	BioPlex_HEK293T
676	440145	114791	BioPlex_HEK293T
677	440145	27229	BioPlex_HEK293T
678	440145	7283	BioPlex_HEK293T
679	440145	10426	BioPlex_HEK293T
680	440145	85378	BioPlex_HEK293T
681	440145	653784	BioPlex_HEK293T
682	440145	80097	BioPlex_HEK293T
683	440145	29922	BioPlex_HEK293T
684	4900	55223	BioPlex_HEK293T
685	4900	84455	BioPlex_HEK293T
686	26471	6407	BioPlex_HEK293T
687	26471	6406	BioPlex_HEK293T
688	389336	7009	BioPlex_HEK293T
689	11142	7298	BioPlex_HEK293T
690	11142	5568	BioPlex_HEK293T
691	11142	5567	BioPlex_HEK293T
692	140823	51752	BioPlex_HEK293T
693	10879	10491	BioPlex_HEK293T
694	10879	590	BioPlex_HEK293T
695	6637	6631	BioPlex_HEK293T
696	6637	6626	BioPlex_HEK293T
697	6637	6629	BioPlex_HEK293T
698	6637	10081	BioPlex_HEK293T
699	6637	9129	BioPlex_HEK293T
700	6637	23451	BioPlex_HEK293T
701	6637	114034	BioPlex_HEK293T
702	6637	24148	BioPlex_HEK293T
703	6637	11218	BioPlex_HEK293T
704	6637	23020	BioPlex_HEK293T
705	6637	10594	BioPlex_HEK293T
706	6637	24144	BioPlex_HEK293T
707	6637	64852	BioPlex_HEK293T
708	6637	10992	BioPlex_HEK293T
709	6637	143884	BioPlex_HEK293T
710	6637	27336	BioPlex_HEK293T
711	6637	11066	BioPlex_HEK293T
712	6637	55783	BioPlex_HEK293T
713	6637	60625	BioPlex_HEK293T
714	6637	50628	BioPlex_HEK293T
715	6637	9343	BioPlex_HEK293T
716	6637	94104	BioPlex_HEK293T
717	6637	22950	BioPlex_HEK293T
718	6637	51340	BioPlex_HEK293T
719	6637	9733	BioPlex_HEK293T
720	6637	9416	BioPlex_HEK293T
721	6637	26121	BioPlex_HEK293T
722	6637	10291	BioPlex_HEK293T
723	6637	56949	BioPlex_HEK293T
724	6637	84292	BioPlex_HEK293T
725	6637	79833	BioPlex_HEK293T
726	6637	56257	BioPlex_HEK293T
727	6637	55280	BioPlex_HEK293T
728	6637	9092	BioPlex_HEK293T
729	6637	22938	BioPlex_HEK293T
730	6637	154007	BioPlex_HEK293T
731	6637	9465	BioPlex_HEK293T
732	6637	55599	BioPlex_HEK293T
733	6637	10946	BioPlex_HEK293T
734	6637	55094	BioPlex_HEK293T
735	6637	6633	BioPlex_HEK293T
736	6637	1207	BioPlex_HEK293T
737	6637	151903	BioPlex_HEK293T
738	6637	8220	BioPlex_HEK293T
739	6637	10450	BioPlex_HEK293T
740	6637	51362	BioPlex_HEK293T
741	6637	9716	BioPlex_HEK293T
742	6637	6635	BioPlex_HEK293T
743	6637	11017	BioPlex_HEK293T
744	6637	6627	BioPlex_HEK293T
745	6637	25929	BioPlex_HEK293T
746	6637	25949	BioPlex_HEK293T
747	6637	6625	BioPlex_HEK293T
748	6637	10907	BioPlex_HEK293T
749	6637	8233	BioPlex_HEK293T
750	6637	51639	BioPlex_HEK293T
751	6637	79706	BioPlex_HEK293T
752	6637	6607	BioPlex_HEK293T
753	6637	134353	BioPlex_HEK293T
754	6637	84967	BioPlex_HEK293T
755	6637	10421	BioPlex_HEK293T
756	6637	6636	BioPlex_HEK293T
757	6637	10262	BioPlex_HEK293T
758	6637	253635	BioPlex_HEK293T
759	6637	6632	BioPlex_HEK293T
760	6637	6638	BioPlex_HEK293T
761	6637	6628	BioPlex_HEK293T
762	6637	27258	BioPlex_HEK293T
763	6637	8487	BioPlex_HEK293T
764	6637	10078	BioPlex_HEK293T
765	6637	96764	BioPlex_HEK293T
766	6637	6634	BioPlex_HEK293T
767	6637	55954	BioPlex_HEK293T
768	6637	338657	BioPlex_HEK293T
769	51499	27166	BioPlex_HEK293T
770	51499	51012	BioPlex_HEK293T
771	51499	55588	BioPlex_HEK293T
772	51499	10650	BioPlex_HEK293T
773	51499	3512	BioPlex_HEK293T
774	9321	7529	BioPlex_HEK293T
775	9321	7532	BioPlex_HEK293T
776	9321	7533	BioPlex_HEK293T
777	1831	9819	BioPlex_HEK293T
778	1831	8848	BioPlex_HEK293T
779	1831	81628	BioPlex_HEK293T
780	1831	55165	BioPlex_HEK293T
781	1831	29959	BioPlex_HEK293T
782	27089	7381	BioPlex_HEK293T
783	27089	7385	BioPlex_HEK293T
784	27089	9167	BioPlex_HEK293T
785	27089	7384	BioPlex_HEK293T
786	27089	1327	BioPlex_HEK293T
787	27089	84790	BioPlex_HEK293T
788	27089	7386	BioPlex_HEK293T
789	27089	1537	BioPlex_HEK293T
790	27089	80142	BioPlex_HEK293T
791	27089	140683	BioPlex_HEK293T
792	27089	4519	BioPlex_HEK293T
793	27089	1340	BioPlex_HEK293T
794	27089	3494	BioPlex_HEK293T
795	27089	1469	BioPlex_HEK293T
796	27089	1472	BioPlex_HEK293T
797	140832	23140	BioPlex_HEK293T
798	140832	79654	BioPlex_HEK293T
799	653219	9877	BioPlex_HEK293T
800	653219	9620	BioPlex_HEK293T
801	653219	640	BioPlex_HEK293T
802	653219	9730	BioPlex_HEK293T
803	653219	64763	BioPlex_HEK293T
804	653219	120114	BioPlex_HEK293T
805	653219	2195	BioPlex_HEK293T
806	653219	341640	BioPlex_HEK293T
807	653219	79633	BioPlex_HEK293T
808	653219	7290	BioPlex_HEK293T
809	653219	5099	BioPlex_HEK293T
810	653219	23523	BioPlex_HEK293T
811	653219	65986	BioPlex_HEK293T
812	653219	5612	BioPlex_HEK293T
813	653219	7014	BioPlex_HEK293T
814	653219	4193	BioPlex_HEK293T
815	653219	54386	BioPlex_HEK293T
816	653219	55871	BioPlex_HEK293T
817	653219	55663	BioPlex_HEK293T
818	653219	1952	BioPlex_HEK293T
819	653219	84838	BioPlex_HEK293T
820	653219	10009	BioPlex_HEK293T
821	653219	84059	BioPlex_HEK293T
822	653219	7976	BioPlex_HEK293T
823	653219	55322	BioPlex_HEK293T
824	653219	5098	BioPlex_HEK293T
825	653219	1951	BioPlex_HEK293T
826	653219	1877	BioPlex_HEK293T
827	653219	118472	BioPlex_HEK293T
828	653219	8642	BioPlex_HEK293T
829	56882	9669	BioPlex_HEK293T
830	56882	4285	BioPlex_HEK293T
831	56882	998	BioPlex_HEK293T
832	56882	2274	BioPlex_HEK293T
833	56882	53339	BioPlex_HEK293T
834	1163	890	BioPlex_HEK293T
835	1163	81620	BioPlex_HEK293T
836	1163	983	BioPlex_HEK293T
837	1163	1017	BioPlex_HEK293T
838	1163	1018	BioPlex_HEK293T
839	1163	9133	BioPlex_HEK293T
840	1163	51053	BioPlex_HEK293T
841	1163	898	BioPlex_HEK293T
842	1163	6500	BioPlex_HEK293T
843	1163	8454	BioPlex_HEK293T
844	1163	1164	BioPlex_HEK293T
845	1163	891	BioPlex_HEK293T
846	1163	6502	BioPlex_HEK293T
847	1163	22858	BioPlex_HEK293T
848	1163	9134	BioPlex_HEK293T
849	1163	1917	BioPlex_HEK293T
850	1163	1026	BioPlex_HEK293T
851	1163	1027	BioPlex_HEK293T
852	1163	9088	BioPlex_HEK293T
853	1164	890	BioPlex_HEK293T
854	1164	1017	BioPlex_HEK293T
855	1164	983	BioPlex_HEK293T
856	1164	81620	BioPlex_HEK293T
857	1164	9133	BioPlex_HEK293T
858	1164	891	BioPlex_HEK293T
859	1164	51053	BioPlex_HEK293T
860	1164	1027	BioPlex_HEK293T
861	1164	9088	BioPlex_HEK293T
862	1164	898	BioPlex_HEK293T
863	1347	1327	BioPlex_HEK293T
864	1347	7156	BioPlex_HEK293T
865	1347	1340	BioPlex_HEK293T
866	1347	55471	BioPlex_HEK293T
867	1347	728489	BioPlex_HEK293T
868	1396	5529	BioPlex_HEK293T
869	1396	7083	BioPlex_HEK293T
870	56998	1499	BioPlex_HEK293T
871	56998	1496	BioPlex_HEK293T
872	56998	324	BioPlex_HEK293T
873	56998	10687	BioPlex_HEK293T
874	56998	7084	BioPlex_HEK293T
875	56998	669	BioPlex_HEK293T
876	140596	10531	BioPlex_HEK293T
877	140596	55005	BioPlex_HEK293T
878	140596	10437	BioPlex_HEK293T
879	245934	6400	BioPlex_HEK293T
880	245934	1373	BioPlex_HEK293T
881	245934	10956	BioPlex_HEK293T
882	245934	1292	BioPlex_HEK293T
883	245934	91147	BioPlex_HEK293T
884	245934	221806	BioPlex_HEK293T
885	245934	255758	BioPlex_HEK293T
886	285381	1802	BioPlex_HEK293T
887	285381	11101	BioPlex_HEK293T
888	285381	26297	BioPlex_HEK293T
889	414149	6714	BioPlex_HEK293T
890	414149	51	BioPlex_HEK293T
891	414149	55753	BioPlex_HEK293T
892	414149	2781	BioPlex_HEK293T
893	414149	3241	BioPlex_HEK293T
894	414149	57794	BioPlex_HEK293T
895	414149	57465	BioPlex_HEK293T
896	414149	55824	BioPlex_HEK293T
897	56990	1831	BioPlex_HEK293T
898	56990	998	BioPlex_HEK293T
899	56990	284297	BioPlex_HEK293T
900	79145	6277	BioPlex_HEK293T
901	170622	51122	BioPlex_HEK293T
902	170622	51699	BioPlex_HEK293T
903	170622	57020	BioPlex_HEK293T
904	170622	54520	BioPlex_HEK293T
905	170622	51397	BioPlex_HEK293T
906	170622	4238	BioPlex_HEK293T
907	170622	54939	BioPlex_HEK293T
908	170622	149951	BioPlex_HEK293T
909	170622	404636	BioPlex_HEK293T
910	170622	7027	BioPlex_HEK293T
911	170622	10311	BioPlex_HEK293T
912	170622	28952	BioPlex_HEK293T
913	170622	23636	BioPlex_HEK293T
914	170622	28991	BioPlex_HEK293T
915	170622	54951	BioPlex_HEK293T
916	170622	29099	BioPlex_HEK293T
917	170622	23412	BioPlex_HEK293T
918	170622	150684	BioPlex_HEK293T
919	170622	133418	BioPlex_HEK293T
920	170622	26276	BioPlex_HEK293T
921	170622	1876	BioPlex_HEK293T
922	1340	6285	BioPlex_HEK293T
923	1340	1327	BioPlex_HEK293T
924	1340	7385	BioPlex_HEK293T
925	1340	1329	BioPlex_HEK293T
926	1340	131474	BioPlex_HEK293T
927	1340	440686	BioPlex_HEK293T
928	8655	80014	BioPlex_HEK293T
929	8655	23028	BioPlex_HEK293T
930	8655	7158	BioPlex_HEK293T
931	8655	140710	BioPlex_HEK293T
932	8655	23255	BioPlex_HEK293T
933	8655	57614	BioPlex_HEK293T
934	8655	3895	BioPlex_HEK293T
935	8655	256364	BioPlex_HEK293T
936	8655	55917	BioPlex_HEK293T
937	8655	83992	BioPlex_HEK293T
938	8655	9231	BioPlex_HEK293T
939	8655	9203	BioPlex_HEK293T
940	8655	9202	BioPlex_HEK293T
941	8655	256949	BioPlex_HEK293T
942	8655	126917	BioPlex_HEK293T
943	8655	25900	BioPlex_HEK293T
944	8655	57464	BioPlex_HEK293T
945	8655	85369	BioPlex_HEK293T
946	8655	5577	BioPlex_HEK293T
947	8655	55112	BioPlex_HEK293T
948	8655	1778	BioPlex_HEK293T
949	8655	81610	BioPlex_HEK293T
950	8655	6801	BioPlex_HEK293T
951	8655	29966	BioPlex_HEK293T
952	8655	29888	BioPlex_HEK293T
953	8655	57507	BioPlex_HEK293T
954	8655	23060	BioPlex_HEK293T
955	8655	10142	BioPlex_HEK293T
956	8655	23074	BioPlex_HEK293T
957	8655	51143	BioPlex_HEK293T
958	8655	23515	BioPlex_HEK293T
959	8655	11011	BioPlex_HEK293T
960	8655	9874	BioPlex_HEK293T
961	8655	3161	BioPlex_HEK293T
962	8655	10243	BioPlex_HEK293T
963	8655	22995	BioPlex_HEK293T
964	8655	2804	BioPlex_HEK293T
965	8655	7227	BioPlex_HEK293T
966	8655	25959	BioPlex_HEK293T
967	8655	23189	BioPlex_HEK293T
968	8655	100134230	BioPlex_HEK293T
969	8655	55755	BioPlex_HEK293T
970	8655	154796	BioPlex_HEK293T
971	8655	154810	BioPlex_HEK293T
972	8655	51421	BioPlex_HEK293T
973	8655	79866	BioPlex_HEK293T
974	8655	54820	BioPlex_HEK293T
975	8655	81565	BioPlex_HEK293T
976	8655	222194	BioPlex_HEK293T
977	8655	54665	BioPlex_HEK293T
978	8655	3798	BioPlex_HEK293T
979	8655	1780	BioPlex_HEK293T
980	8655	1781	BioPlex_HEK293T
981	8655	22906	BioPlex_HEK293T
982	8655	8481	BioPlex_HEK293T
983	8655	55561	BioPlex_HEK293T
984	8655	57646	BioPlex_HEK293T
985	8655	9204	BioPlex_HEK293T
986	8655	5568	BioPlex_HEK293T
987	8655	5567	BioPlex_HEK293T
988	8655	150864	BioPlex_HEK293T
989	8655	81558	BioPlex_HEK293T
990	8655	10615	BioPlex_HEK293T
991	8655	1783	BioPlex_HEK293T
992	8655	7518	BioPlex_HEK293T
993	8655	283248	BioPlex_HEK293T
994	8655	55758	BioPlex_HEK293T
995	8655	23186	BioPlex_HEK293T
996	8655	401145	BioPlex_HEK293T
997	8655	55728	BioPlex_HEK293T
998	8655	81545	BioPlex_HEK293T
999	8655	55109	BioPlex_HEK293T
1000	8655	140735	BioPlex_HEK293T
1001	8655	571	BioPlex_HEK293T
1002	8655	7750	BioPlex_HEK293T
1003	8655	441430	BioPlex_HEK293T
1004	8655	728747	BioPlex_HEK293T
1005	8655	23024	BioPlex_HEK293T
1006	8655	1039	BioPlex_HEK293T
1007	8655	9728	BioPlex_HEK293T
1008	8655	25843	BioPlex_HEK293T
1009	8655	54462	BioPlex_HEK293T
1010	8655	113263	BioPlex_HEK293T
1011	8655	331	BioPlex_HEK293T
1012	8655	25792	BioPlex_HEK293T
1013	8655	91754	BioPlex_HEK293T
1014	8655	58508	BioPlex_HEK293T
1015	8655	5829	BioPlex_HEK293T
1016	8655	81602	BioPlex_HEK293T
1017	8655	255758	BioPlex_HEK293T
1018	8655	201725	BioPlex_HEK293T
1019	8655	30850	BioPlex_HEK293T
1020	8655	90417	BioPlex_HEK293T
1021	8655	83989	BioPlex_HEK293T
1022	8655	56479	BioPlex_HEK293T
1023	8655	64753	BioPlex_HEK293T
1024	8655	84085	BioPlex_HEK293T
1025	8655	10126	BioPlex_HEK293T
1026	8655	1859	BioPlex_HEK293T
1027	8655	56977	BioPlex_HEK293T
1028	8655	89891	BioPlex_HEK293T
1029	8655	79618	BioPlex_HEK293T
1030	8655	23300	BioPlex_HEK293T
1031	8655	374986	BioPlex_HEK293T
1032	8655	23394	BioPlex_HEK293T
1033	8655	221061	BioPlex_HEK293T
1034	8655	284069	BioPlex_HEK293T
1035	8655	9191	BioPlex_HEK293T
1036	8655	3321	BioPlex_HEK293T
1037	8655	4170	BioPlex_HEK293T
1038	8655	64743	BioPlex_HEK293T
1039	8655	473	BioPlex_HEK293T
1040	8655	598	BioPlex_HEK293T
1041	8655	10018	BioPlex_HEK293T
1042	8655	10193	BioPlex_HEK293T
1043	140735	80014	BioPlex_HEK293T
1044	140735	23028	BioPlex_HEK293T
1045	140735	7158	BioPlex_HEK293T
1046	140735	140710	BioPlex_HEK293T
1047	140735	23255	BioPlex_HEK293T
1048	140735	57614	BioPlex_HEK293T
1049	140735	256364	BioPlex_HEK293T
1050	140735	9231	BioPlex_HEK293T
1051	140735	9202	BioPlex_HEK293T
1052	140735	9203	BioPlex_HEK293T
1053	140735	126917	BioPlex_HEK293T
1054	140735	25900	BioPlex_HEK293T
1055	140735	57464	BioPlex_HEK293T
1056	140735	85369	BioPlex_HEK293T
1057	140735	5577	BioPlex_HEK293T
1058	140735	55112	BioPlex_HEK293T
1059	140735	1778	BioPlex_HEK293T
1060	140735	10133	BioPlex_HEK293T
1061	140735	27143	BioPlex_HEK293T
1062	140735	6801	BioPlex_HEK293T
1063	140735	29966	BioPlex_HEK293T
1064	140735	29888	BioPlex_HEK293T
1065	140735	58508	BioPlex_HEK293T
1066	140735	57507	BioPlex_HEK293T
1067	140735	23060	BioPlex_HEK293T
1068	140735	10142	BioPlex_HEK293T
1069	140735	23074	BioPlex_HEK293T
1070	140735	51143	BioPlex_HEK293T
1071	140735	23515	BioPlex_HEK293T
1072	140735	3161	BioPlex_HEK293T
1073	140735	84210	BioPlex_HEK293T
1074	140735	441430	BioPlex_HEK293T
1075	140735	11011	BioPlex_HEK293T
1076	140735	9874	BioPlex_HEK293T
1077	140735	10243	BioPlex_HEK293T
1078	140735	22995	BioPlex_HEK293T
1079	140735	2804	BioPlex_HEK293T
1080	140735	7227	BioPlex_HEK293T
1081	140735	25959	BioPlex_HEK293T
1082	140735	23189	BioPlex_HEK293T
1083	140735	55917	BioPlex_HEK293T
1084	140735	83992	BioPlex_HEK293T
1085	140735	8887	BioPlex_HEK293T
1086	140735	100134230	BioPlex_HEK293T
1087	140735	55755	BioPlex_HEK293T
1088	140735	154796	BioPlex_HEK293T
1089	140735	154810	BioPlex_HEK293T
1090	140735	51421	BioPlex_HEK293T
1091	140735	79866	BioPlex_HEK293T
1092	140735	9454	BioPlex_HEK293T
1093	140735	54820	BioPlex_HEK293T
1094	140735	222194	BioPlex_HEK293T
1095	140735	54665	BioPlex_HEK293T
1096	140735	9728	BioPlex_HEK293T
1097	140735	6322	BioPlex_HEK293T
1098	140735	7518	BioPlex_HEK293T
1099	140735	3798	BioPlex_HEK293T
1100	140735	1780	BioPlex_HEK293T
1101	140735	1781	BioPlex_HEK293T
1102	140735	22906	BioPlex_HEK293T
1103	140735	25843	BioPlex_HEK293T
1104	140735	29761	BioPlex_HEK293T
1105	140735	7403	BioPlex_HEK293T
1106	140735	55561	BioPlex_HEK293T
1107	140735	57646	BioPlex_HEK293T
1108	140735	23286	BioPlex_HEK293T
1109	140735	81558	BioPlex_HEK293T
1110	140735	80821	BioPlex_HEK293T
1111	140735	150864	BioPlex_HEK293T
1112	140735	8496	BioPlex_HEK293T
1113	140735	8481	BioPlex_HEK293T
1114	140735	10196	BioPlex_HEK293T
1115	140735	9204	BioPlex_HEK293T
1116	140735	56616	BioPlex_HEK293T
1117	140735	10615	BioPlex_HEK293T
1118	140735	1783	BioPlex_HEK293T
1119	140735	55109	BioPlex_HEK293T
1120	140735	55728	BioPlex_HEK293T
1121	140735	283248	BioPlex_HEK293T
1122	140735	55758	BioPlex_HEK293T
1123	140735	23186	BioPlex_HEK293T
1124	140735	123811	BioPlex_HEK293T
1125	140735	81545	BioPlex_HEK293T
1126	140735	571	BioPlex_HEK293T
1127	140735	7750	BioPlex_HEK293T
1128	140735	23024	BioPlex_HEK293T
1129	140735	1039	BioPlex_HEK293T
1130	140735	10198	BioPlex_HEK293T
1131	140735	5568	BioPlex_HEK293T
1132	140735	5567	BioPlex_HEK293T
1133	140735	331	BioPlex_HEK293T
1134	140735	25792	BioPlex_HEK293T
1135	140735	91754	BioPlex_HEK293T
1136	140735	283638	BioPlex_HEK293T
1137	140735	5829	BioPlex_HEK293T
1138	140735	255758	BioPlex_HEK293T
1139	140735	113263	BioPlex_HEK293T
1140	140735	55149	BioPlex_HEK293T
1141	140735	7267	BioPlex_HEK293T
1142	140735	64753	BioPlex_HEK293T
1143	140735	30850	BioPlex_HEK293T
1144	140735	81610	BioPlex_HEK293T
1145	140735	90417	BioPlex_HEK293T
1146	140735	83989	BioPlex_HEK293T
1147	140735	79149	BioPlex_HEK293T
1148	140735	56479	BioPlex_HEK293T
1149	140735	23300	BioPlex_HEK293T
1150	140735	22976	BioPlex_HEK293T
1151	140735	84085	BioPlex_HEK293T
1152	140735	10126	BioPlex_HEK293T
1153	140735	1859	BioPlex_HEK293T
1154	140735	81602	BioPlex_HEK293T
1155	140735	89891	BioPlex_HEK293T
1156	140735	23394	BioPlex_HEK293T
1157	140735	8927	BioPlex_HEK293T
1158	140735	9191	BioPlex_HEK293T
1159	140735	221061	BioPlex_HEK293T
1160	140735	284069	BioPlex_HEK293T
1161	140735	79618	BioPlex_HEK293T
1162	140735	64743	BioPlex_HEK293T
1163	140735	374986	BioPlex_HEK293T
1164	140735	4170	BioPlex_HEK293T
1165	140735	252983	BioPlex_HEK293T
1166	140735	54462	BioPlex_HEK293T
1167	140735	374655	BioPlex_HEK293T
1168	140735	57608	BioPlex_HEK293T
1169	140735	55626	BioPlex_HEK293T
1170	140735	8178	BioPlex_HEK293T
1171	140735	10413	BioPlex_HEK293T
1172	140735	57224	BioPlex_HEK293T
1173	140735	598	BioPlex_HEK293T
1174	140735	10018	BioPlex_HEK293T
1175	140735	23054	BioPlex_HEK293T
1176	140735	10193	BioPlex_HEK293T
1177	5348	57120	BioPlex_HEK293T
1178	5348	79896	BioPlex_HEK293T
1179	5348	51382	BioPlex_HEK293T
1180	5348	10397	BioPlex_HEK293T
1181	5348	56952	BioPlex_HEK293T
1182	5348	65009	BioPlex_HEK293T
1183	5348	57446	BioPlex_HEK293T
1184	5348	27290	BioPlex_HEK293T
1185	5348	2644	BioPlex_HEK293T
1186	2644	1981	BioPlex_HEK293T
1187	2644	10767	BioPlex_HEK293T
1188	2644	23363	BioPlex_HEK293T
1189	2644	359948	BioPlex_HEK293T
1190	2644	10645	BioPlex_HEK293T
1191	2644	139818	BioPlex_HEK293T
1192	2644	54870	BioPlex_HEK293T
1193	2644	10529	BioPlex_HEK293T
1194	2644	126789	BioPlex_HEK293T
1195	2644	865	BioPlex_HEK293T
1196	2796	55128	BioPlex_HEK293T
1197	2796	115416	BioPlex_HEK293T
1198	2994	8893	BioPlex_HEK293T
1199	2994	5822	BioPlex_HEK293T
1200	2994	1967	BioPlex_HEK293T
1201	2994	8890	BioPlex_HEK293T
1202	2994	28969	BioPlex_HEK293T
1203	2994	9689	BioPlex_HEK293T
1204	2994	6252	BioPlex_HEK293T
1205	2994	28982	BioPlex_HEK293T
1206	2994	2101	BioPlex_HEK293T
1207	2994	27340	BioPlex_HEK293T
1208	2994	23047	BioPlex_HEK293T
1209	2994	23244	BioPlex_HEK293T
1210	2994	285966	BioPlex_HEK293T
1211	2994	545	BioPlex_HEK293T
1212	2994	79801	BioPlex_HEK293T
1213	2994	9807	BioPlex_HEK293T
1214	2994	10564	BioPlex_HEK293T
1215	2994	55027	BioPlex_HEK293T
1216	2994	1785	BioPlex_HEK293T
1217	2994	26052	BioPlex_HEK293T
1218	2994	114826	BioPlex_HEK293T
1219	2994	2189	BioPlex_HEK293T
1220	2994	9354	BioPlex_HEK293T
1221	2994	26953	BioPlex_HEK293T
1222	2994	2072	BioPlex_HEK293T
1223	2994	987	BioPlex_HEK293T
1224	2994	196074	BioPlex_HEK293T
1225	2994	57181	BioPlex_HEK293T
1226	2994	30000	BioPlex_HEK293T
1227	2994	7095	BioPlex_HEK293T
1228	2994	8891	BioPlex_HEK293T
1229	2994	57168	BioPlex_HEK293T
1230	2994	9382	BioPlex_HEK293T
1231	2994	10426	BioPlex_HEK293T
1232	2994	6253	BioPlex_HEK293T
1233	2994	56262	BioPlex_HEK293T
1234	2994	25839	BioPlex_HEK293T
1235	2994	10162	BioPlex_HEK293T
1236	2994	64901	BioPlex_HEK293T
1237	2994	8892	BioPlex_HEK293T
1238	2994	64216	BioPlex_HEK293T
1239	2994	10550	BioPlex_HEK293T
1240	2994	10459	BioPlex_HEK293T
1241	2994	23555	BioPlex_HEK293T
1242	2994	10815	BioPlex_HEK293T
1243	2994	10735	BioPlex_HEK293T
1244	25994	478	BioPlex_HEK293T
1245	25994	9670	BioPlex_HEK293T
1246	25994	55732	BioPlex_HEK293T
1247	3151	5119	BioPlex_HEK293T
1248	3151	79786	BioPlex_HEK293T
1249	3151	2632	BioPlex_HEK293T
1250	3151	10038	BioPlex_HEK293T
1251	3669	5793	BioPlex_HEK293T
1252	3669	6714	BioPlex_HEK293T
1253	3669	1456	BioPlex_HEK293T
1254	3669	80820	BioPlex_HEK293T
1255	337971	10269	BioPlex_HEK293T
1256	337971	10693	BioPlex_HEK293T
1257	337971	84908	BioPlex_HEK293T
1258	337971	57486	BioPlex_HEK293T
1259	337971	55848	BioPlex_HEK293T
1260	337971	9941	BioPlex_HEK293T
1261	23658	57819	BioPlex_HEK293T
1262	23658	25804	BioPlex_HEK293T
1263	23658	27257	BioPlex_HEK293T
1264	23658	51691	BioPlex_HEK293T
1265	23658	9129	BioPlex_HEK293T
1266	23658	9733	BioPlex_HEK293T
1267	23658	24148	BioPlex_HEK293T
1268	23658	84619	BioPlex_HEK293T
1269	23658	64852	BioPlex_HEK293T
1270	23658	9128	BioPlex_HEK293T
1271	23658	6285	BioPlex_HEK293T
1272	23658	112724	BioPlex_HEK293T
1273	23658	5429	BioPlex_HEK293T
1274	23658	219988	BioPlex_HEK293T
1275	23658	9465	BioPlex_HEK293T
1276	23658	6633	BioPlex_HEK293T
1277	23658	56257	BioPlex_HEK293T
1278	23658	51690	BioPlex_HEK293T
1279	23658	79171	BioPlex_HEK293T
1280	23658	55374	BioPlex_HEK293T
1281	23658	6634	BioPlex_HEK293T
1282	23658	145864	BioPlex_HEK293T
1283	23658	27258	BioPlex_HEK293T
1284	23658	118472	BioPlex_HEK293T
1285	23658	6636	BioPlex_HEK293T
1286	57226	54995	BioPlex_HEK293T
1287	57226	35	BioPlex_HEK293T
1288	57226	4706	BioPlex_HEK293T
1289	63905	57120	BioPlex_HEK293T
1290	63905	6277	BioPlex_HEK293T
1291	63905	57226	BioPlex_HEK293T
1292	10962	6285	BioPlex_HEK293T
1293	64981	401466	BioPlex_HEK293T
1294	64981	26953	BioPlex_HEK293T
1295	64981	3843	BioPlex_HEK293T
1296	64981	11001	BioPlex_HEK293T
1297	64981	6169	BioPlex_HEK293T
1298	64981	54148	BioPlex_HEK293T
1299	64981	51118	BioPlex_HEK293T
1300	64981	3050	BioPlex_HEK293T
1301	64981	57129	BioPlex_HEK293T
1302	64981	1456	BioPlex_HEK293T
1303	64981	6143	BioPlex_HEK293T
1304	64981	5906	BioPlex_HEK293T
1305	64981	28998	BioPlex_HEK293T
1306	64981	124995	BioPlex_HEK293T
1307	64981	10573	BioPlex_HEK293T
1308	64981	54534	BioPlex_HEK293T
1309	64981	51073	BioPlex_HEK293T
1310	118430	10954	BioPlex_HEK293T
1311	118430	51234	BioPlex_HEK293T
1312	56901	3323	BioPlex_HEK293T
1313	56901	653269	BioPlex_HEK293T
1314	56901	345651	BioPlex_HEK293T
1315	5364	3043	BioPlex_HEK293T
1316	5364	3669	BioPlex_HEK293T
1317	5364	3040	BioPlex_HEK293T
1318	5364	23676	BioPlex_HEK293T
1319	6168	6181	BioPlex_HEK293T
1320	6168	51388	BioPlex_HEK293T
1321	6168	6124	BioPlex_HEK293T
1322	6168	4691	BioPlex_HEK293T
1323	6168	80135	BioPlex_HEK293T
1324	6168	339230	BioPlex_HEK293T
1325	6168	400506	BioPlex_HEK293T
1326	6168	55131	BioPlex_HEK293T
1327	6168	6189	BioPlex_HEK293T
1328	6168	6208	BioPlex_HEK293T
1329	6168	640	BioPlex_HEK293T
1330	6168	57062	BioPlex_HEK293T
1331	6168	117246	BioPlex_HEK293T
1332	6168	3609	BioPlex_HEK293T
1333	6168	9188	BioPlex_HEK293T
1334	6168	50804	BioPlex_HEK293T
1335	6168	6175	BioPlex_HEK293T
1336	6168	6122	BioPlex_HEK293T
1337	6168	643836	BioPlex_HEK293T
1338	6168	9015	BioPlex_HEK293T
1339	6168	84450	BioPlex_HEK293T
1340	6168	6780	BioPlex_HEK293T
1341	6168	54606	BioPlex_HEK293T
1342	6168	6128	BioPlex_HEK293T
1343	6168	55661	BioPlex_HEK293T
1344	6168	10153	BioPlex_HEK293T
1345	6168	84656	BioPlex_HEK293T
1346	6168	57109	BioPlex_HEK293T
1347	6168	64794	BioPlex_HEK293T
1348	6168	51121	BioPlex_HEK293T
1349	6168	6141	BioPlex_HEK293T
1350	6168	7468	BioPlex_HEK293T
1351	6168	84310	BioPlex_HEK293T
1352	6168	23378	BioPlex_HEK293T
1353	6168	64282	BioPlex_HEK293T
1354	6168	10969	BioPlex_HEK293T
1355	6168	84294	BioPlex_HEK293T
1356	6168	6838	BioPlex_HEK293T
1357	6168	4869	BioPlex_HEK293T
1358	6168	9933	BioPlex_HEK293T
1359	6168	6194	BioPlex_HEK293T
1360	6168	4839	BioPlex_HEK293T
1361	6168	56829	BioPlex_HEK293T
1362	6168	6166	BioPlex_HEK293T
1363	6168	29997	BioPlex_HEK293T
1364	6168	51807	BioPlex_HEK293T
1365	6168	84298	BioPlex_HEK293T
1366	6168	29777	BioPlex_HEK293T
1367	6168	9733	BioPlex_HEK293T
1368	6168	23029	BioPlex_HEK293T
1369	6168	6125	BioPlex_HEK293T
1370	6168	5929	BioPlex_HEK293T
1371	6168	6202	BioPlex_HEK293T
1372	6168	6161	BioPlex_HEK293T
1373	6168	64318	BioPlex_HEK293T
1374	6168	55299	BioPlex_HEK293T
1375	6168	55646	BioPlex_HEK293T
1376	6168	6138	BioPlex_HEK293T
1377	6168	139231	BioPlex_HEK293T
1378	6168	6147	BioPlex_HEK293T
1379	6168	29889	BioPlex_HEK293T
1380	6168	25873	BioPlex_HEK293T
1381	6168	6130	BioPlex_HEK293T
1382	6168	55839	BioPlex_HEK293T
1383	6168	10412	BioPlex_HEK293T
1384	6168	84248	BioPlex_HEK293T
1385	6168	6158	BioPlex_HEK293T
1386	6168	6203	BioPlex_HEK293T
1387	6168	285855	BioPlex_HEK293T
1388	6168	10199	BioPlex_HEK293T
1389	6168	84154	BioPlex_HEK293T
1390	6168	6137	BioPlex_HEK293T
1391	6168	63977	BioPlex_HEK293T
1392	6168	6430	BioPlex_HEK293T
1393	6168	6431	BioPlex_HEK293T
1394	6168	9092	BioPlex_HEK293T
1395	6168	84811	BioPlex_HEK293T
1396	6168	201161	BioPlex_HEK293T
1397	6168	692312	BioPlex_HEK293T
1398	6168	51755	BioPlex_HEK293T
1399	6168	6156	BioPlex_HEK293T
1400	6168	54989	BioPlex_HEK293T
1401	6168	84872	BioPlex_HEK293T
1402	6168	7570	BioPlex_HEK293T
1403	6168	9013	BioPlex_HEK293T
1404	6168	8575	BioPlex_HEK293T
1405	6232	2521	BioPlex_HEK293T
1406	6232	55824	BioPlex_HEK293T
1407	6232	728378	BioPlex_HEK293T
1408	6232	7277	BioPlex_HEK293T
1409	6232	6714	BioPlex_HEK293T
1410	6232	538	BioPlex_HEK293T
1411	6232	10381	BioPlex_HEK293T
1412	6232	347688	BioPlex_HEK293T
1413	6232	5528	BioPlex_HEK293T
1414	6277	23265	BioPlex_HEK293T
1415	6277	7936	BioPlex_HEK293T
1416	6277	11169	BioPlex_HEK293T
1417	6277	8189	BioPlex_HEK293T
1418	6277	8428	BioPlex_HEK293T
1419	6277	51765	BioPlex_HEK293T
1420	6277	25929	BioPlex_HEK293T
1421	6277	91272	BioPlex_HEK293T
1422	6277	6813	BioPlex_HEK293T
1423	6277	23066	BioPlex_HEK293T
1424	6277	10617	BioPlex_HEK293T
1425	6277	63877	BioPlex_HEK293T
1426	6277	64837	BioPlex_HEK293T
1427	6277	115106	BioPlex_HEK293T
1428	6277	27101	BioPlex_HEK293T
1429	6277	3978	BioPlex_HEK293T
1430	6277	54882	BioPlex_HEK293T
1431	6277	26057	BioPlex_HEK293T
1432	6277	80789	BioPlex_HEK293T
1433	6277	53615	BioPlex_HEK293T
1434	6277	9392	BioPlex_HEK293T
1435	6277	5635	BioPlex_HEK293T
1436	6277	80143	BioPlex_HEK293T
1437	6277	55656	BioPlex_HEK293T
1438	6277	26586	BioPlex_HEK293T
1439	6277	221656	BioPlex_HEK293T
1440	6277	54902	BioPlex_HEK293T
1441	6277	22979	BioPlex_HEK293T
1442	6277	4976	BioPlex_HEK293T
1443	6277	29941	BioPlex_HEK293T
1444	6277	25920	BioPlex_HEK293T
1445	6277	53407	BioPlex_HEK293T
1446	6277	55813	BioPlex_HEK293T
1447	6277	55197	BioPlex_HEK293T
1448	6277	55763	BioPlex_HEK293T
1449	6277	5706	BioPlex_HEK293T
1450	6277	64770	BioPlex_HEK293T
1451	6277	5702	BioPlex_HEK293T
1452	6277	51622	BioPlex_HEK293T
1453	6277	7360	BioPlex_HEK293T
1454	6277	29924	BioPlex_HEK293T
1455	6277	158787	BioPlex_HEK293T
1456	6277	84220	BioPlex_HEK293T
1457	6277	5903	BioPlex_HEK293T
1458	6277	5715	BioPlex_HEK293T
1459	6277	10362	BioPlex_HEK293T
1460	6277	55755	BioPlex_HEK293T
1461	6277	79980	BioPlex_HEK293T
1462	6277	147841	BioPlex_HEK293T
1463	6277	8496	BioPlex_HEK293T
1464	6277	9945	BioPlex_HEK293T
1465	6277	23376	BioPlex_HEK293T
1466	6277	54552	BioPlex_HEK293T
1467	6277	2067	BioPlex_HEK293T
1468	6277	23078	BioPlex_HEK293T
1469	6277	26512	BioPlex_HEK293T
1470	6277	203522	BioPlex_HEK293T
1471	6277	348180	BioPlex_HEK293T
1472	6277	146909	BioPlex_HEK293T
1473	6277	57038	BioPlex_HEK293T
1474	6277	84969	BioPlex_HEK293T
1475	6277	6299	BioPlex_HEK293T
1476	6277	1841	BioPlex_HEK293T
1477	6277	126003	BioPlex_HEK293T
1478	6277	26227	BioPlex_HEK293T
1479	6277	84056	BioPlex_HEK293T
1480	6277	391356	BioPlex_HEK293T
1481	6277	5884	BioPlex_HEK293T
1482	6277	23392	BioPlex_HEK293T
1483	6277	152185	BioPlex_HEK293T
1484	6277	10892	BioPlex_HEK293T
1485	6277	9559	BioPlex_HEK293T
1486	6277	89978	BioPlex_HEK293T
1487	6277	1730	BioPlex_HEK293T
1488	6277	29110	BioPlex_HEK293T
1489	6277	5298	BioPlex_HEK293T
1490	6277	56850	BioPlex_HEK293T
1491	6277	79003	BioPlex_HEK293T
1492	6277	54517	BioPlex_HEK293T
1493	6277	55536	BioPlex_HEK293T
1494	6277	23130	BioPlex_HEK293T
1495	6277	57703	BioPlex_HEK293T
1496	6277	26052	BioPlex_HEK293T
1497	6277	220134	BioPlex_HEK293T
1498	6277	134957	BioPlex_HEK293T
1499	6277	7351	BioPlex_HEK293T
1500	6277	163486	BioPlex_HEK293T
1501	6277	3628	BioPlex_HEK293T
1502	6277	2733	BioPlex_HEK293T
1503	6277	145508	BioPlex_HEK293T
1504	6277	55737	BioPlex_HEK293T
1505	6277	3298	BioPlex_HEK293T
1506	6277	3297	BioPlex_HEK293T
1507	6277	154791	BioPlex_HEK293T
1508	6277	121441	BioPlex_HEK293T
1509	6277	55704	BioPlex_HEK293T
1510	6277	25843	BioPlex_HEK293T
1511	6277	8481	BioPlex_HEK293T
1512	6277	6904	BioPlex_HEK293T
1513	6277	57405	BioPlex_HEK293T
1514	6277	51115	BioPlex_HEK293T
1515	6277	83451	BioPlex_HEK293T
1516	6277	83596	BioPlex_HEK293T
1517	6277	55324	BioPlex_HEK293T
1518	6277	8737	BioPlex_HEK293T
1519	6277	79140	BioPlex_HEK293T
1520	6277	5892	BioPlex_HEK293T
1521	6277	55565	BioPlex_HEK293T
1522	6277	81559	BioPlex_HEK293T
1523	6277	23248	BioPlex_HEK293T
1524	6277	5190	BioPlex_HEK293T
1525	6277	54556	BioPlex_HEK293T
1526	6277	11216	BioPlex_HEK293T
1527	6277	160760	BioPlex_HEK293T
1528	6277	26031	BioPlex_HEK293T
1529	6277	10239	BioPlex_HEK293T
1530	6277	64423	BioPlex_HEK293T
1531	6277	112936	BioPlex_HEK293T
1532	6277	1489	BioPlex_HEK293T
1533	6277	6674	BioPlex_HEK293T
1534	6277	2671	BioPlex_HEK293T
1535	6277	164832	BioPlex_HEK293T
1536	6277	8717	BioPlex_HEK293T
1537	6277	1039	BioPlex_HEK293T
1538	6279	80303	BioPlex_HEK293T
1539	6279	2805	BioPlex_HEK293T
1540	6279	342527	BioPlex_HEK293T
1541	6285	8318	BioPlex_HEK293T
1542	6285	8826	BioPlex_HEK293T
1543	6285	10788	BioPlex_HEK293T
1544	6285	79915	BioPlex_HEK293T
1545	6285	81691	BioPlex_HEK293T
1546	6285	2309	BioPlex_HEK293T
1547	6285	9053	BioPlex_HEK293T
1548	6285	27164	BioPlex_HEK293T
1549	6285	6299	BioPlex_HEK293T
1550	6285	6297	BioPlex_HEK293T
1551	6285	84190	BioPlex_HEK293T
1552	6285	83858	BioPlex_HEK293T
1553	6285	55210	BioPlex_HEK293T
1554	6285	201798	BioPlex_HEK293T
1555	6285	4643	BioPlex_HEK293T
1556	6285	163051	BioPlex_HEK293T
1557	6285	10628	BioPlex_HEK293T
1558	6285	148206	BioPlex_HEK293T
1559	6285	7551	BioPlex_HEK293T
1560	6285	7695	BioPlex_HEK293T
1561	6285	9658	BioPlex_HEK293T
1562	6285	9745	BioPlex_HEK293T
1563	6285	92342	BioPlex_HEK293T
1564	6285	3716	BioPlex_HEK293T
1565	6285	22847	BioPlex_HEK293T
1566	6285	7182	BioPlex_HEK293T
1567	6285	49854	BioPlex_HEK293T
1568	6285	114984	BioPlex_HEK293T
1569	6285	253260	BioPlex_HEK293T
1570	6285	8602	BioPlex_HEK293T
1571	6285	55602	BioPlex_HEK293T
1572	6285	211	BioPlex_HEK293T
1573	6285	5371	BioPlex_HEK293T
1574	6285	10813	BioPlex_HEK293T
1575	6285	51530	BioPlex_HEK293T
1576	6285	205564	BioPlex_HEK293T
1577	6285	10848	BioPlex_HEK293T
1578	6285	26030	BioPlex_HEK293T
1579	6285	23594	BioPlex_HEK293T
1580	6285	283248	BioPlex_HEK293T
1581	6285	54888	BioPlex_HEK293T
1582	6285	9349	BioPlex_HEK293T
1583	6285	5424	BioPlex_HEK293T
1584	6285	26512	BioPlex_HEK293T
1585	6285	89910	BioPlex_HEK293T
1586	6285	79834	BioPlex_HEK293T
1587	6285	8496	BioPlex_HEK293T
1588	6285	151246	BioPlex_HEK293T
1589	6285	125950	BioPlex_HEK293T
1590	6285	79649	BioPlex_HEK293T
1591	6285	85395	BioPlex_HEK293T
1592	6285	65986	BioPlex_HEK293T
1593	6285	84271	BioPlex_HEK293T
1594	6285	605	BioPlex_HEK293T
1595	6285	9275	BioPlex_HEK293T
1596	6285	55196	BioPlex_HEK293T
1597	6285	80223	BioPlex_HEK293T
1598	6285	54517	BioPlex_HEK293T
1599	6285	79050	BioPlex_HEK293T
1600	6285	92922	BioPlex_HEK293T
1601	6285	57224	BioPlex_HEK293T
1602	6285	8481	BioPlex_HEK293T
1603	6285	25909	BioPlex_HEK293T
1604	6285	10389	BioPlex_HEK293T
1605	6285	54545	BioPlex_HEK293T
1606	6285	83987	BioPlex_HEK293T
1607	6285	51780	BioPlex_HEK293T
1608	6285	51118	BioPlex_HEK293T
1609	6285	90353	BioPlex_HEK293T
1610	6285	23119	BioPlex_HEK293T
1611	6285	80119	BioPlex_HEK293T
1612	6285	84144	BioPlex_HEK293T
1613	6285	55719	BioPlex_HEK293T
1614	6285	84248	BioPlex_HEK293T
1615	6285	59343	BioPlex_HEK293T
1616	6285	5128	BioPlex_HEK293T
1617	6285	5129	BioPlex_HEK293T
1618	6285	116840	BioPlex_HEK293T
1619	6285	26036	BioPlex_HEK293T
1620	6285	64858	BioPlex_HEK293T
1621	6285	23331	BioPlex_HEK293T
1622	6285	29903	BioPlex_HEK293T
1623	6285	79710	BioPlex_HEK293T
1624	6285	140459	BioPlex_HEK293T
1625	6285	8458	BioPlex_HEK293T
1626	6285	2962	BioPlex_HEK293T
1627	6285	85456	BioPlex_HEK293T
1628	6285	4303	BioPlex_HEK293T
1629	6285	5558	BioPlex_HEK293T
1630	6285	2232	BioPlex_HEK293T
1631	6285	56941	BioPlex_HEK293T
1632	6285	9189	BioPlex_HEK293T
1633	6285	7014	BioPlex_HEK293T
1634	6285	65250	BioPlex_HEK293T
1635	6285	25879	BioPlex_HEK293T
1636	6285	83608	BioPlex_HEK293T
1637	6285	4999	BioPlex_HEK293T
1638	6285	51263	BioPlex_HEK293T
1639	6285	113026	BioPlex_HEK293T
1640	6285	4216	BioPlex_HEK293T
1641	6285	8204	BioPlex_HEK293T
1642	6285	23133	BioPlex_HEK293T
1643	6285	10620	BioPlex_HEK293T
1644	6285	57584	BioPlex_HEK293T
1645	6285	54478	BioPlex_HEK293T
1646	6285	2077	BioPlex_HEK293T
1647	6285	201134	BioPlex_HEK293T
1648	6285	9925	BioPlex_HEK293T
1649	6285	9650	BioPlex_HEK293T
1650	6285	284106	BioPlex_HEK293T
1651	6285	84265	BioPlex_HEK293T
1652	6285	5557	BioPlex_HEK293T
1653	6285	57659	BioPlex_HEK293T
1654	6285	2671	BioPlex_HEK293T
1655	6285	51409	BioPlex_HEK293T
1656	6285	92595	BioPlex_HEK293T
1657	6285	84678	BioPlex_HEK293T
1658	6285	116988	BioPlex_HEK293T
1659	6285	7517	BioPlex_HEK293T
1660	7356	59	BioPlex_HEK293T
1661	404552	9254	BioPlex_HEK293T
1662	404552	781	BioPlex_HEK293T
1663	404552	3309	BioPlex_HEK293T
1664	404552	153642	BioPlex_HEK293T
1665	404552	79937	BioPlex_HEK293T
1666	404552	590	BioPlex_HEK293T
1667	404552	949	BioPlex_HEK293T
1668	404552	8754	BioPlex_HEK293T
1669	404552	1292	BioPlex_HEK293T
1670	404552	135228	BioPlex_HEK293T
1671	404552	84059	BioPlex_HEK293T
1672	404552	4012	BioPlex_HEK293T
1673	404552	58497	BioPlex_HEK293T
1674	404552	51752	BioPlex_HEK293T
1675	404552	1956	BioPlex_HEK293T
1676	404552	26507	BioPlex_HEK293T
1677	404552	55819	BioPlex_HEK293T
1678	404552	23621	BioPlex_HEK293T
1679	404552	387263	BioPlex_HEK293T
1680	404552	10003	BioPlex_HEK293T
1681	55652	4831	BioPlex_HEK293T
1682	8303	81542	BioPlex_HEK293T
1683	8303	26136	BioPlex_HEK293T
1684	8303	92140	BioPlex_HEK293T
1685	6635	23450	BioPlex_HEK293T
1686	6635	57819	BioPlex_HEK293T
1687	6635	9129	BioPlex_HEK293T
1688	6635	23451	BioPlex_HEK293T
1689	6635	114034	BioPlex_HEK293T
1690	6635	25929	BioPlex_HEK293T
1691	6635	24148	BioPlex_HEK293T
1692	6635	11218	BioPlex_HEK293T
1693	6635	23020	BioPlex_HEK293T
1694	6635	10594	BioPlex_HEK293T
1695	6635	27336	BioPlex_HEK293T
1696	6635	24144	BioPlex_HEK293T
1697	6635	64852	BioPlex_HEK293T
1698	6635	10992	BioPlex_HEK293T
1699	6635	143884	BioPlex_HEK293T
1700	6635	9343	BioPlex_HEK293T
1701	6635	9128	BioPlex_HEK293T
1702	6635	51319	BioPlex_HEK293T
1703	6635	11066	BioPlex_HEK293T
1704	6635	100130932	BioPlex_HEK293T
1705	6635	56949	BioPlex_HEK293T
1706	6635	55094	BioPlex_HEK293T
1707	6635	9879	BioPlex_HEK293T
1708	6635	55783	BioPlex_HEK293T
1709	6635	60625	BioPlex_HEK293T
1710	6635	50628	BioPlex_HEK293T
1711	6635	94104	BioPlex_HEK293T
1712	6635	22950	BioPlex_HEK293T
1713	6635	51340	BioPlex_HEK293T
1714	6635	9733	BioPlex_HEK293T
1715	6635	91603	BioPlex_HEK293T
1716	6635	55280	BioPlex_HEK293T
1717	6635	988	BioPlex_HEK293T
1718	6635	10291	BioPlex_HEK293T
1719	6635	9416	BioPlex_HEK293T
1720	6635	10946	BioPlex_HEK293T
1721	6635	10073	BioPlex_HEK293T
1722	6635	26121	BioPlex_HEK293T
1723	6635	54960	BioPlex_HEK293T
1724	6635	6936	BioPlex_HEK293T
1725	6635	9716	BioPlex_HEK293T
1726	6635	6626	BioPlex_HEK293T
1727	6635	6629	BioPlex_HEK293T
1728	6635	84292	BioPlex_HEK293T
1729	6635	79833	BioPlex_HEK293T
1730	6635	56257	BioPlex_HEK293T
1731	6635	96764	BioPlex_HEK293T
1732	6635	9092	BioPlex_HEK293T
1733	6635	22938	BioPlex_HEK293T
1734	6635	51362	BioPlex_HEK293T
1735	6635	9465	BioPlex_HEK293T
1736	6635	154007	BioPlex_HEK293T
1737	6635	6633	BioPlex_HEK293T
1738	6635	6631	BioPlex_HEK293T
1739	6635	1207	BioPlex_HEK293T
1740	6635	10523	BioPlex_HEK293T
1741	6635	151903	BioPlex_HEK293T
1742	6635	27257	BioPlex_HEK293T
1743	6635	8220	BioPlex_HEK293T
1744	6635	9410	BioPlex_HEK293T
1745	6635	57461	BioPlex_HEK293T
1746	6635	338657	BioPlex_HEK293T
1747	6635	23350	BioPlex_HEK293T
1748	6635	134353	BioPlex_HEK293T
1749	6635	8175	BioPlex_HEK293T
1750	6635	55599	BioPlex_HEK293T
1751	6635	253635	BioPlex_HEK293T
1752	6635	11017	BioPlex_HEK293T
1753	6635	6627	BioPlex_HEK293T
1754	6635	79171	BioPlex_HEK293T
1755	6635	25949	BioPlex_HEK293T
1756	6635	6625	BioPlex_HEK293T
1757	6635	8233	BioPlex_HEK293T
1758	6635	10450	BioPlex_HEK293T
1759	6635	55837	BioPlex_HEK293T
1760	6635	6634	BioPlex_HEK293T
1761	6635	51639	BioPlex_HEK293T
1762	6635	79706	BioPlex_HEK293T
1763	6635	6607	BioPlex_HEK293T
1764	6635	54957	BioPlex_HEK293T
1765	6635	6636	BioPlex_HEK293T
1766	6635	10262	BioPlex_HEK293T
1767	6635	6632	BioPlex_HEK293T
1768	6635	10421	BioPlex_HEK293T
1769	6635	6638	BioPlex_HEK293T
1770	6635	6628	BioPlex_HEK293T
1771	6635	27258	BioPlex_HEK293T
1772	6635	55696	BioPlex_HEK293T
1773	6635	8487	BioPlex_HEK293T
1774	6635	10078	BioPlex_HEK293T
1775	6635	10081	BioPlex_HEK293T
1776	6636	6631	BioPlex_HEK293T
1777	6636	57819	BioPlex_HEK293T
1778	6636	6625	BioPlex_HEK293T
1779	6636	10081	BioPlex_HEK293T
1780	6636	9129	BioPlex_HEK293T
1781	6636	9410	BioPlex_HEK293T
1782	6636	114034	BioPlex_HEK293T
1783	6636	24148	BioPlex_HEK293T
1784	6636	11218	BioPlex_HEK293T
1785	6636	23020	BioPlex_HEK293T
1786	6636	10594	BioPlex_HEK293T
1787	6636	24144	BioPlex_HEK293T
1788	6636	64852	BioPlex_HEK293T
1789	6636	143884	BioPlex_HEK293T
1790	6636	27336	BioPlex_HEK293T
1791	6636	9343	BioPlex_HEK293T
1792	6636	9128	BioPlex_HEK293T
1793	6636	11066	BioPlex_HEK293T
1794	6636	100130932	BioPlex_HEK293T
1795	6636	56949	BioPlex_HEK293T
1796	6636	55094	BioPlex_HEK293T
1797	6636	55783	BioPlex_HEK293T
1798	6636	60625	BioPlex_HEK293T
1799	6636	50628	BioPlex_HEK293T
1800	6636	94104	BioPlex_HEK293T
1801	6636	51340	BioPlex_HEK293T
1802	6636	9733	BioPlex_HEK293T
1803	6636	9416	BioPlex_HEK293T
1804	6636	26121	BioPlex_HEK293T
1805	6636	85437	BioPlex_HEK293T
1806	6636	10291	BioPlex_HEK293T
1807	6636	54960	BioPlex_HEK293T
1808	6636	9716	BioPlex_HEK293T
1809	6636	6626	BioPlex_HEK293T
1810	6636	6629	BioPlex_HEK293T
1811	6636	84292	BioPlex_HEK293T
1812	6636	79833	BioPlex_HEK293T
1813	6636	56257	BioPlex_HEK293T
1814	6636	25929	BioPlex_HEK293T
1815	6636	10262	BioPlex_HEK293T
1816	6636	124220	BioPlex_HEK293T
1817	6636	9465	BioPlex_HEK293T
1818	6636	154007	BioPlex_HEK293T
1819	6636	8233	BioPlex_HEK293T
1820	6636	10946	BioPlex_HEK293T
1821	6636	11193	BioPlex_HEK293T
1822	6636	57461	BioPlex_HEK293T
1823	6636	6633	BioPlex_HEK293T
1824	6636	1207	BioPlex_HEK293T
1825	6636	27257	BioPlex_HEK293T
1826	6636	60313	BioPlex_HEK293T
1827	6636	51362	BioPlex_HEK293T
1828	6636	140683	BioPlex_HEK293T
1829	6636	55599	BioPlex_HEK293T
1830	6636	51691	BioPlex_HEK293T
1831	6636	6627	BioPlex_HEK293T
1832	6636	96764	BioPlex_HEK293T
1833	6636	10907	BioPlex_HEK293T
1834	6636	10450	BioPlex_HEK293T
1835	6636	6634	BioPlex_HEK293T
1836	6636	6607	BioPlex_HEK293T
1837	6636	134353	BioPlex_HEK293T
1838	6636	84967	BioPlex_HEK293T
1839	6636	10421	BioPlex_HEK293T
1840	6636	6632	BioPlex_HEK293T
1841	6636	6638	BioPlex_HEK293T
1842	6636	6628	BioPlex_HEK293T
1843	6636	8175	BioPlex_HEK293T
1844	6636	57563	BioPlex_HEK293T
1845	6636	253635	BioPlex_HEK293T
1846	6636	8487	BioPlex_HEK293T
1847	6636	10078	BioPlex_HEK293T
1848	6636	55696	BioPlex_HEK293T
1849	6636	55954	BioPlex_HEK293T
1850	6636	1469	BioPlex_HEK293T
1851	6636	1472	BioPlex_HEK293T
1852	6636	10879	BioPlex_HEK293T
1853	6691	2644	BioPlex_HEK293T
1854	6691	3416	BioPlex_HEK293T
1855	6691	10531	BioPlex_HEK293T
1856	6691	197131	BioPlex_HEK293T
1857	6691	23203	BioPlex_HEK293T
1858	6691	85369	BioPlex_HEK293T
1859	6691	55917	BioPlex_HEK293T
1860	6691	9512	BioPlex_HEK293T
1861	6691	27109	BioPlex_HEK293T
1862	6691	23304	BioPlex_HEK293T
1863	6691	6801	BioPlex_HEK293T
1864	6691	90379	BioPlex_HEK293T
1865	6691	89970	BioPlex_HEK293T
1866	6691	4285	BioPlex_HEK293T
1867	6691	25843	BioPlex_HEK293T
1868	6691	57546	BioPlex_HEK293T
1869	6691	254552	BioPlex_HEK293T
1870	27290	3909	BioPlex_HEK293T
1871	27290	9562	BioPlex_HEK293T
1872	27290	56928	BioPlex_HEK293T
1873	27290	91147	BioPlex_HEK293T
1874	27290	5362	BioPlex_HEK293T
1875	27290	5654	BioPlex_HEK293T
1876	27290	51148	BioPlex_HEK293T
1877	27290	79269	BioPlex_HEK293T
1878	84651	3416	BioPlex_HEK293T
1879	84651	3313	BioPlex_HEK293T
1880	84651	329	BioPlex_HEK293T
1881	84651	25852	BioPlex_HEK293T
1882	84651	10296	BioPlex_HEK293T
1883	84651	10444	BioPlex_HEK293T
1884	84651	7314	BioPlex_HEK293T
1885	84651	116372	BioPlex_HEK293T
1886	84651	23676	BioPlex_HEK293T
1887	6726	6727	BioPlex_HEK293T
1888	6726	6729	BioPlex_HEK293T
1889	6726	6730	BioPlex_HEK293T
1890	6726	441024	BioPlex_HEK293T
1891	6726	10797	BioPlex_HEK293T
1892	6726	6731	BioPlex_HEK293T
1893	6726	51605	BioPlex_HEK293T
1894	6726	115708	BioPlex_HEK293T
1895	6726	1896	BioPlex_HEK293T
1896	6726	56852	BioPlex_HEK293T
1897	6726	6728	BioPlex_HEK293T
1898	6726	25820	BioPlex_HEK293T
1899	284297	9648	BioPlex_HEK293T
1900	284297	151230	BioPlex_HEK293T
1901	284297	84898	BioPlex_HEK293T
1902	644186	93166	BioPlex_HEK293T
1903	644186	7314	BioPlex_HEK293T
1904	644186	9318	BioPlex_HEK293T
1905	644186	132320	BioPlex_HEK293T
1906	644186	9456	BioPlex_HEK293T
1907	644186	51138	BioPlex_HEK293T
1908	644186	1062	BioPlex_HEK293T
1909	644186	60412	BioPlex_HEK293T
1910	644186	23354	BioPlex_HEK293T
1911	644186	163786	BioPlex_HEK293T
1912	644186	11130	BioPlex_HEK293T
1913	644186	8453	BioPlex_HEK293T
1914	644186	862	BioPlex_HEK293T
1915	644186	9139	BioPlex_HEK293T
1916	644186	51199	BioPlex_HEK293T
1917	644186	10980	BioPlex_HEK293T
1918	644186	64708	BioPlex_HEK293T
1919	644186	22897	BioPlex_HEK293T
1920	644186	8805	BioPlex_HEK293T
1921	644186	10615	BioPlex_HEK293T
1922	644186	79441	BioPlex_HEK293T
1923	644186	55857	BioPlex_HEK293T
1924	644186	55142	BioPlex_HEK293T
1925	644186	54930	BioPlex_HEK293T
1926	644186	64946	BioPlex_HEK293T
1927	644186	9821	BioPlex_HEK293T
1928	644186	57511	BioPlex_HEK293T
1929	644186	84376	BioPlex_HEK293T
1930	644186	10116	BioPlex_HEK293T
1931	644186	3050	BioPlex_HEK293T
1932	644186	389840	BioPlex_HEK293T
1933	644186	54940	BioPlex_HEK293T
1934	644186	90417	BioPlex_HEK293T
1935	644186	115209	BioPlex_HEK293T
1936	644186	9342	BioPlex_HEK293T
1937	644186	23271	BioPlex_HEK293T
1938	644186	54801	BioPlex_HEK293T
1939	644186	93323	BioPlex_HEK293T
1940	644186	131405	BioPlex_HEK293T
1941	644186	23456	BioPlex_HEK293T
1942	644186	3801	BioPlex_HEK293T
1943	644186	25844	BioPlex_HEK293T
1944	644186	11064	BioPlex_HEK293T
1945	644186	55275	BioPlex_HEK293T
1946	644186	11079	BioPlex_HEK293T
1947	644186	50813	BioPlex_HEK293T
1948	644186	89958	BioPlex_HEK293T
1949	644186	8799	BioPlex_HEK293T
1950	646938	6277	BioPlex_HEK293T
1951	51569	6277	BioPlex_HEK293T
1952	7388	7385	BioPlex_HEK293T
1953	7388	9167	BioPlex_HEK293T
1954	7388	10120	BioPlex_HEK293T
1955	7388	5824	BioPlex_HEK293T
1956	7388	11258	BioPlex_HEK293T
1957	7388	1327	BioPlex_HEK293T
1958	7388	55860	BioPlex_HEK293T
1959	7388	7386	BioPlex_HEK293T
1960	7388	1537	BioPlex_HEK293T
1961	7388	7381	BioPlex_HEK293T
1962	7388	203068	BioPlex_HEK293T
1963	7388	7384	BioPlex_HEK293T
1964	7388	84516	BioPlex_HEK293T
1965	7388	139818	BioPlex_HEK293T
1966	7388	131474	BioPlex_HEK293T
1967	7388	27089	BioPlex_HEK293T
1968	7388	4519	BioPlex_HEK293T
1969	7388	10671	BioPlex_HEK293T
1970	7388	284297	BioPlex_HEK293T
1971	10141	59	BioPlex_HEK293T
1972	10141	4548	BioPlex_HEK293T
1973	10141	8218	BioPlex_HEK293T
1974	10141	160851	BioPlex_HEK293T
1975	10141	11116	BioPlex_HEK293T
1976	10141	55755	BioPlex_HEK293T
1977	10141	151011	BioPlex_HEK293T
1978	10141	3832	BioPlex_HEK293T
1979	10141	54832	BioPlex_HEK293T
1980	10141	8450	BioPlex_HEK293T
1981	10141	148252	BioPlex_HEK293T
1982	10141	55188	BioPlex_HEK293T
1983	10141	55236	BioPlex_HEK293T
1984	10141	80208	BioPlex_HEK293T
1985	10141	54963	BioPlex_HEK293T
1986	10141	317	BioPlex_HEK293T
1987	10141	5970	BioPlex_HEK293T
1988	10141	23676	BioPlex_HEK293T
1989	10141	55559	BioPlex_HEK293T
1990	10141	57148	BioPlex_HEK293T
1991	10141	54887	BioPlex_HEK293T
1992	10141	5604	BioPlex_HEK293T
1993	10141	23729	BioPlex_HEK293T
1994	6367	10954	BioPlex_HEK293T
1995	6367	80746	BioPlex_HEK293T
1996	6367	10531	BioPlex_HEK293T
1997	6367	54915	BioPlex_HEK293T
[truncated: 239,315+ more rows]
