# Supplementary material for: Extracellular Vesicle Proteomes Shed Light on the Evolutionary, Interactive, and Functional Divergence of Their Biogenesis Mechanisms
Source: Front Cell Dev Biol. 2021 Oct 1;9:734950. doi: 10.3389/fcell.2021.734950 (PMC8517337; doi:10.3389/fcell.2021.734950)
Supplement: Supplementary Table 4 — List of functional annotations enriched in proteins more frequently identified in (A) sEV and (B) lEV datasets. (C) Functional enrichment for proteins similarly identified in sEV and lEV was analyzed using their identification count across human datasets in EVpedia. The table contains a detailed description of the table. ES, enrichment score; NES, normalized enrichment score; NOM, nominal; FDR, false discovery rate; FWER, family-wise error rate. [file Table_4.XLSX]

## Sheet: Table Detail
Supplementary Table 4
Table	Table title	Description	Column title	Details
4A	List of functional annotations enriched in proteins more frequently identified in sEV datasets. ES, enrichment score; NES, normalized enrichment score; NOM, nominal; FDR, false discovery rate; FWER, family-wise error rate.	Raw data used for Figure 4 and Supplementary Figure 2	Index	Row index
			Functional term	Gene Ontology term, tested for enrichment
			Size	Number of genes with corresponding functional term
			ES	Enrichment score from GSEA
			NES	Normalized enrichment score from GSEA
			NOM p-val	Nominal p-value from GSEA
			FDR q-val	False discovery rate from GSEA
			FWER p-val	Family-wise error rate from GSEA
			RANK AT MAX	Gene rank with maximum enrichment score from GSEA
4B	List of functional annotations enriched in proteins more frequently identified in lEV datasets. ES, enrichment score; NES, normalized enrichment score; NOM, nominal; FDR, false discovery rate; FWER, family-wise error rate.	Raw data used for Figure 4 and Supplementary Figure 2	Index	Row index
			Functional term	Gene Ontology term, tested for enrichment
			Size	Number of genes with corresponding functional term
			ES	Enrichment score from GSEA
			NES	Normalized enrichment score from GSEA
			NOM p-val	Nominal p-value from GSEA
			FDR q-val	False discovery rate from GSEA
			FWER p-val	Family-wise error rate from GSEA
			RANK AT MAX	Gene rank with maximum enrichment score from GSEA
4C	Functional enrichment for proteins similarly identified in sEV and lEV were analyzed using their identification count across human datasets in EVpedia. ES, enrichment score; NES, normalized enrichment score; NOM, nominal; FDR, false discovery rate; FWER, family-wise error rate.	Raw data used for Supplementary Figure 3	Index	Row index
			Functional term	Gene Ontology term, tested for enrichment
			Size	Number of genes with corresponding functional term
			ES	Enrichment score from GSEA
			NES	Normalized enrichment score from GSEA
			NOM p-val	Nominal p-value from GSEA
			FDR q-val	False discovery rate from GSEA
			FWER p-val	Family-wise error rate from GSEA
			RANK AT MAX	Gene rank with maximum enrichment score from GSEA

## Sheet: SupTable4A
Supplementary Table 4A. List of functional annotations enriched in proteins more frequently identified in sEV datasets. ES, enrichment score; NES, normalized enrichment score; NOM, nominal; FDR, false discovery rate; FWER, family-wise error rate.
Index	Functional term	Size	ES	NES	NOM p-val	FDR q-val	FWER p-val	RANK AT MAX
1	UBIQUITIN-DEPENDENT PROTEIN CATABOLIC PROCESS VIA THE MULTIVESICULAR BODY SORTING PATHWAY%GOBP%GO:0043162	19	0.823994	2.58483	0	0	0	557
2	ENDOSOME ORGANIZATION%GOBP%GO:0007032	50	0.650751	2.57865	0	0	0	1643
3	VIRAL BUDDING%GOBP%GO:0046755	25	0.747893	2.48093	0	0	0	1140
4	MULTIVESICULAR BODY ORGANIZATION%GOBP%GO:0036257	30	0.697113	2.48085	0	0	0	1571
5	MULTIVESICULAR BODY ASSEMBLY%GOBP%GO:0036258	29	0.695339	2.42691	0	0.000336013	0.001	1571
6	HCMV LATE EVENTS%REACTOME%R-HSA-9610379.2	72	0.556989	2.42402	0	0.000280011	0.001	1192
7	ERBB4 SIGNALING EVENTS%PATHWAY INTERACTION DATABASE NCI-NATURE CURATED DATA%ERBB4 SIGNALING EVENTS	15	0.790365	2.39732	0	0.000240009	0.001	604
8	ESTABLISHMENT OF PROTEIN LOCALIZATION TO VACUOLE%GOBP%GO:0072666	28	0.682224	2.34143	0	0.000417464	0.002	1053
9	PROTEIN LOCALIZATION TO VACUOLE%GOBP%GO:0072665	38	0.636371	2.33637	0	0.000371079	0.002	1202
10	PID_ERBB4_PATHWAY%MSIGDB_C2%PID_ERBB4_PATHWAY	15	0.790365	2.32728	0	0.000333971	0.002	604
11	VIRAL BUDDING VIA HOST ESCRT COMPLEX%GOBP%GO:0039702	20	0.724061	2.29884	0	0.00030361	0.002	1140
12	ENDOSOMAL SORTING COMPLEX REQUIRED FOR TRANSPORT (ESCRT)%REACTOME DATABASE ID RELEASE 75%917729	30	0.645184	2.29477	0	0.000278309	0.002	1140
13	ENDOSOMAL TRANSPORT%GOBP%GO:0016197	147	0.47609	2.27761	0	0.000637113	0.005	1571
14	VIRION ASSEMBLY%GOBP%GO:0019068	37	0.611915	2.261	0	0.000707246	0.006	1169
15	ENDOSOME TRANSPORT VIA MULTIVESICULAR BODY SORTING PATHWAY%GOBP%GO:0032509	23	0.672098	2.24444	0	0.001104	0.01	1140
16	BUDDING AND MATURATION OF HIV VIRION%REACTOME DATABASE ID RELEASE 75%162588	27	0.657699	2.22076	0	0.00185759	0.017	1140
17	REGULATION OF VIRAL RELEASE FROM HOST CELL%GOBP%GO:1902186	18	0.717794	2.2044	0	0.00241666	0.024	1356
18	VESICLE ORGANIZATION%GOBP%GO:0016050	185	0.431318	2.19333	0	0.00308315	0.033	1571
19	REGULATION OF DENDRITE MORPHOGENESIS%GOBP%GO:0048814	22	0.662292	2.18742	0	0.00308445	0.035	760
20	VACUOLAR TRANSPORT%GOBP%GO:0007034	86	0.483924	2.18185	0	0.00325578	0.039	1198
21	PROTEIN TARGETING TO VACUOLE%GOBP%GO:0006623	23	0.660468	2.17335	0	0.00373087	0.047	1053
22	LAMININ INTERACTIONS%REACTOME DATABASE ID RELEASE 75%3000157	22	0.656829	2.17058	0	0.00378537	0.05	1737
23	MRNA PROCESSING%WIKIPATHWAYS_20210210%WP411%HOMO SAPIENS	107	0.465265	2.15392	0	0.00460801	0.064	1681
24	REGULATION OF ORGANELLE ASSEMBLY%GOBP%GO:1902115	86	0.481221	2.15032	0	0.00482709	0.07	1779
25	HCMV INFECTION%REACTOME DATABASE ID RELEASE 75%9609646	90	0.487123	2.14396	0	0.00502087	0.075	1236
26	MULTIVESICULAR BODY SORTING PATHWAY%GOBP%GO:0071985	28	0.607982	2.14368	0	0.00489017	0.076	1140
27	LATE ENDOSOME TO VACUOLE TRANSPORT%GOBP%GO:0045324	18	0.686012	2.13717	0	0.00513549	0.083	1140
28	REGULATION OF SPINDLE ASSEMBLY%GOBP%GO:0090169	19	0.650535	2.05423	0	0.0151187	0.228	1543
29	PID_INSULIN_PATHWAY%MSIGDB_C2%PID_INSULIN_PATHWAY	32	0.565764	2.05258	0	0.0151033	0.236	973
30	INSULIN PATHWAY%PATHWAY INTERACTION DATABASE NCI-NATURE CURATED DATA%INSULIN PATHWAY	33	0.552856	2.04721	0	0.0152535	0.244	973
31	PRE-MRNA SPLICING%REACTOME DATABASE ID RELEASE 75%72163	157	0.411932	2.04424	0	0.0155385	0.256	2051
32	MET ACTIVATES PTK2 SIGNALING%REACTOME DATABASE ID RELEASE 75%8874081	17	0.683323	2.04141	0	0.0154626	0.26	1499
33	PDGFR-BETA PATHWAY%WIKIPATHWAYS_20210210%WP3972%HOMO SAPIENS	21	0.632993	2.03416	0	0.0169927	0.287	1034
34	A6B1 AND A6B4 INTEGRIN SIGNALING%PATHWAY INTERACTION DATABASE NCI-NATURE CURATED DATA%A6B1 AND A6B4 INTEGRIN SIGNALING	37	0.545937	2.03099	0	0.0172617	0.301	1755
35	MITOTIC CYTOKINESIS%GOBP%GO:0000281	40	0.528145	2.02654	0	0.0176565	0.315	1543
36	POSITIVE REGULATION OF MRNA PROCESSING%GOBP%GO:0050685	20	0.636295	2.01802	0.00289855	0.0183955	0.333	1916
37	MET PROMOTES CELL MOTILITY%REACTOME%R-HSA-8875878.1	25	0.589588	2.0167	0	0.0181667	0.336	1248
38	PID_A6B1_A6B4_INTEGRIN_PATHWAY%MSIGDB_C2%PID_A6B1_A6B4_INTEGRIN_PATHWAY	37	0.545937	2.01341	0	0.0183338	0.347	1755
39	PROCESSING OF CAPPED INTRON-CONTAINING PRE-MRNA%REACTOME%R-HSA-72203.3	195	0.396667	2.00047	0	0.0207081	0.391	2051
40	MRNA SPLICING%REACTOME DATABASE ID RELEASE 75%72172	157	0.411932	1.99818	0	0.0207276	0.401	2051
41	REGULATION OF PROTEIN ACETYLATION%GOBP%GO:1901983	26	0.58649	1.9954	0	0.02086	0.41	1764
42	MACROAUTOPHAGY%GOBP%GO:0016236	108	0.431174	1.98093	0	0.023759	0.453	1074
43	REGULATION OF CENTROSOME DUPLICATION%GOBP%GO:0010824	16	0.657239	1.96443	0	0.0279873	0.513	1140
44	VESICLE-MEDIATED TRANSPORT TO THE PLASMA MEMBRANE%GOBP%GO:0098876	54	0.481244	1.94405	0	0.0354531	0.6	1907
45	PEPTIDYL-THREONINE PHOSPHORYLATION%GOBP%GO:0018107	38	0.513823	1.9401	0.00647249	0.0362368	0.619	1388
46	POSITIVE REGULATION OF HISTONE MODIFICATION%GOBP%GO:0031058	33	0.53706	1.93815	0	0.036123	0.627	1764
47	INTRACELLULAR TRANSPORT OF VIRUS%GOBP%GO:0075733	44	0.498636	1.93764	0	0.035458	0.627	1112
48	REGULATION OF CENTROSOME CYCLE%GOBP%GO:0046605	21	0.613019	1.93495	0	0.0356744	0.636	1989
49	DNA DOUBLE STRAND BREAK RESPONSE%REACTOME%R-HSA-5693606.2	37	0.515695	1.92641	0	0.0383194	0.671	1125
50	SIGNALING BY ERBB4%REACTOME DATABASE ID RELEASE 75%1236394	23	0.583993	1.9255	0	0.037884	0.674	201
51	REGULATION OF MRNA PROCESSING%GOBP%GO:0050684	87	0.434134	1.91762	0	0.0404438	0.712	1980
52	CELL DIVISION%GOBP%GO:0051301	77	0.437201	1.91616	0	0.0402325	0.717	1255
53	REGULATION OF PROTEIN TYROSINE KINASE ACTIVITY%GOBP%GO:0061097	33	0.523456	1.91268	0.00328947	0.0413156	0.733	912
54	NS1 MEDIATED EFFECTS ON HOST PATHWAYS%REACTOME DATABASE ID RELEASE 75%168276	31	0.53543	1.91266	0	0.0405505	0.733	1112
55	POSITIVE REGULATION OF PROTEIN ACETYLATION%GOBP%GO:1901985	17	0.639923	1.91083	0	0.0405581	0.739	1476
56	REGULATION OF MITOTIC SPINDLE ASSEMBLY%GOBP%GO:1901673	16	0.654471	1.90704	0	0.0410581	0.749	1543
57	PROTEIN LOCALIZATION TO LYSOSOME%GOBP%GO:0061462	22	0.587877	1.90668	0.00292398	0.0405361	0.752	1723
58	ORGANELLE MEMBRANE FUSION%GOBP%GO:0090174	52	0.467492	1.90388	0	0.0408237	0.756	1570
59	VIRAL LIFE CYCLE%GOBP%GO:0019058	133	0.404747	1.90354	0	0.0404106	0.759	826
60	RECRUITMENT AND ATM-MEDIATED PHOSPHORYLATION OF REPAIR AND SIGNALING PROTEINS AT DNA DOUBLE STRAND BREAKS%REACTOME DATABASE ID RELEASE 75%5693565	36	0.50537	1.90283	0	0.03998	0.762	1125
61	AUTOPHAGY%GOBP%GO:0006914	127	0.396248	1.89856	0	0.0411661	0.776	1723
62	REGULATION OF CYTOPLASMIC TRANSPORT%GOBP%GO:1903649	24	0.569003	1.89756	0.00296736	0.0409511	0.776	1300
63	LATE ENDOSOMAL MICROAUTOPHAGY%REACTOME%R-HSA-9615710.3	28	0.536544	1.89384	0	0.0417342	0.794	1140
64	REGULATION OF MITOTIC SPINDLE ORGANIZATION%GOBP%GO:0060236	25	0.552812	1.8898	0	0.0426861	0.812	1543
65	PCNA-DEPENDENT LONG PATCH BASE EXCISION REPAIR%REACTOME DATABASE ID RELEASE 75%5651801	15	0.634623	1.88844	0.00539084	0.0426289	0.816	1785
66	CYTOKINETIC PROCESS%GOBP%GO:0032506	23	0.576	1.88699	0.00287356	0.0424765	0.821	1255
67	NEGATIVE REGULATION OF ERBB SIGNALING PATHWAY%GOBP%GO:1901185	28	0.527331	1.88684	0.00308642	0.0420134	0.822	1755
68	REGULATION OF POSTSYNAPSE ORGANIZATION%GOBP%GO:0099175	19	0.593855	1.88283	0.00280112	0.0433642	0.84	102
69	PROCESS UTILIZING AUTOPHAGIC MECHANISM%GOBP%GO:0061919	127	0.396248	1.88072	0	0.0437096	0.846	1723
70	PI METABOLISM%REACTOME%R-HSA-1483255.5	40	0.499416	1.87805	0.00378788	0.0441821	0.854	948
71	TBC RABGAPS%REACTOME%R-HSA-8854214.1	30	0.528521	1.8738	0	0.0457669	0.864	2032
72	AUTOPHAGOSOME MATURATION%GOBP%GO:0097352	19	0.588993	1.87061	0.00263158	0.0466807	0.872	980
73	ENDOCYTIC RECYCLING%GOBP%GO:0032456	33	0.509542	1.87015	0	0.0462184	0.873	1669
74	REGULATION OF PEPTIDYL-LYSINE ACETYLATION%GOBP%GO:2000756	22	0.569011	1.86996	0.00595238	0.0456615	0.874	1764
75	POSITIVE REGULATION OF PLASMA MEMBRANE BOUNDED CELL PROJECTION ASSEMBLY%GOBP%GO:0120034	48	0.464807	1.8693	0	0.0454253	0.877	978
76	CYTOSKELETON-DEPENDENT CYTOKINESIS%GOBP%GO:0061640	51	0.462267	1.86374	0	0.0476463	0.894	1543
77	TRANSPORT OF VIRUS%GOBP%GO:0046794	50	0.468327	1.86339	0	0.0471964	0.895	1112
78	REGULATION OF AUTOPHAGOSOME ASSEMBLY%GOBP%GO:2000785	18	0.607996	1.85776	0.00284091	0.0488417	0.907	1779
79	MULTI-ORGANISM TRANSPORT%GOBP%GO:0044766	59	0.44556	1.85748	0	0.0483261	0.908	826
80	REGULATION OF PLASMA MEMBRANE BOUNDED CELL PROJECTION ASSEMBLY%GOBP%GO:0120032	86	0.4138	1.85643	0	0.0481119	0.909	978
81	MITOTIC NUCLEAR ENVELOPE REASSEMBLY%GOBP%GO:0007084	42	0.475565	1.84866	0.00364964	0.0507855	0.919	1364
82	NEGATIVE REGULATION OF EPIDERMAL GROWTH FACTOR RECEPTOR SIGNALING PATHWAY%GOBP%GO:0042059	25	0.556399	1.84302	0	0.0530331	0.932	1723
83	CYTOKINESIS%GOBP%GO:0000910	53	0.446631	1.84157	0.00383142	0.0529831	0.933	1255
84	HDACS DEACETYLATE HISTONES%REACTOME%R-HSA-3214815.3	41	0.476655	1.82824	0	0.0593159	0.95	1204
85	RNA SPLICING, VIA TRANSESTERIFICATION REACTIONS WITH BULGED ADENOSINE AS NUCLEOPHILE%GOBP%GO:0000377	213	0.35621	1.82796	0	0.0587351	0.951	2063
86	REGULATION OF CELL PROJECTION ASSEMBLY%GOBP%GO:0060491	86	0.4138	1.82796	0	0.0580521	0.951	978
87	IL1%NETPATH%IL1	36	0.495699	1.82794	0	0.0573848	0.951	2187
88	REGULATION OF SPINDLE ORGANIZATION%GOBP%GO:0090224	26	0.54414	1.82403	0	0.0589442	0.955	1543
89	POSITIVE EPIGENETIC REGULATION OF RRNA EXPRESSION%REACTOME DATABASE ID RELEASE 75%5250913	53	0.449622	1.82128	0	0.0598787	0.959	1291
90	NEGATIVE REGULATION OF STRESS FIBER ASSEMBLY%GOBP%GO:0051497	15	0.616358	1.82107	0.00789474	0.059303	0.959	1501
91	NUCLEAR ENVELOPE REASSEMBLY%GOBP%GO:0031468	43	0.471373	1.81857	0	0.0600528	0.962	1364
92	MULTI-ORGANISM LOCALIZATION%GOBP%GO:1902579	59	0.44556	1.81829	0.00371747	0.0595436	0.962	826
93	NEGATIVE REGULATION OF MRNA PROCESSING%GOBP%GO:0050686	19	0.599494	1.81349	0.00291545	0.0617552	0.968	1386
94	LEPTIN SIGNALING PATHWAY%WIKIPATHWAYS_20210210%WP2034%HOMO SAPIENS	48	0.452105	1.81322	0	0.0612381	0.968	1333
95	MRNA SPLICING, VIA SPLICEOSOME%GOBP%GO:0000398	213	0.35621	1.81166	0	0.0615599	0.974	2063
96	RNA SPLICING, VIA TRANSESTERIFICATION REACTIONS%GOBP%GO:0000375	216	0.357268	1.81163	0	0.0609186	0.974	2063
97	NCRNA 3'-END PROCESSING%GOBP%GO:0043628	21	0.570146	1.80873	0.0031348	0.061842	0.977	1409
98	INTERLEUKIN-3, INTERLEUKIN-5 AND GM-CSF SIGNALING%REACTOME DATABASE ID RELEASE 75%512988	22	0.548374	1.79607	0.00571429	0.0683294	0.987	689
99	REGULATION OF HSF1-MEDIATED HEAT SHOCK RESPONSE%REACTOME%R-HSA-3371453.1	57	0.43717	1.79008	0.00408163	0.0717387	0.99	1342
100	SNRNP ASSEMBLY%REACTOME%R-HSA-191859.3	39	0.467555	1.78521	0	0.0738424	0.99	1408
101	NON-CODING RNA METABOLISM%REACTOME%R-HSA-194441.1	39	0.467555	1.7848	0.0030303	0.0733863	0.99	1408
102	SPLICEOSOMAL SNRNP ASSEMBLY%GOBP%GO:0000387	31	0.510554	1.78111	0	0.0747845	0.99	1659
103	POSITIVE REGULATION OF FILOPODIUM ASSEMBLY%GOBP%GO:0051491	17	0.582259	1.77972	0.00852273	0.0751032	0.99	768
104	REGULATION OF INSULIN RECEPTOR SIGNALING PATHWAY%GOBP%GO:0046626	21	0.538978	1.77853	0.00558659	0.0751356	0.99	1035
105	MODIFICATION-DEPENDENT MACROMOLECULE CATABOLIC PROCESS%GOBP%GO:0043632	224	0.342867	1.77689	0	0.0754669	0.991	1716
106	NEGATIVE REGULATION OF MRNA METABOLIC PROCESS%GOBP%GO:1903312	42	0.456547	1.77682	0	0.0747549	0.991	2080
107	NEGATIVE REGULATION OF ACTIN FILAMENT BUNDLE ASSEMBLY%GOBP%GO:0032232	15	0.616358	1.77558	0.0027027	0.0750051	0.992	1501
108	RNA POLYMERASE II TRANSCRIPTION TERMINATION%REACTOME DATABASE ID RELEASE 75%73856	50	0.436721	1.7722	0	0.076889	0.993	2381
109	TRANSCRIPTIONAL REGULATION OF GRANULOPOIESIS%REACTOME%R-HSA-9616222.2	30	0.514202	1.76752	0	0.07902	0.993	2112
110	RETROGRADE TRANSPORT, ENDOSOME TO GOLGI%GOBP%GO:0042147	55	0.434512	1.7662	0	0.079057	0.993	1723
111	IL9%NETPATH%IL9	18	0.574027	1.76308	0.0078329	0.0807045	0.993	1376
112	REELIN SIGNALING PATHWAY%PATHWAY INTERACTION DATABASE NCI-NATURE CURATED DATA%REELIN SIGNALING PATHWAY	21	0.548572	1.76298	0.00576369	0.0800586	0.993	408
113	POSITIVE REGULATION OF ORGANELLE ASSEMBLY%GOBP%GO:1902117	31	0.4781	1.76288	0.00299401	0.0794205	0.993	1680
114	PROCESSING OF CAPPED INTRONLESS PRE-MRNA%REACTOME%R-HSA-75067.2	19	0.564329	1.76212	0.00543478	0.0791679	0.993	2344
115	VESICLE FUSION%GOBP%GO:0006906	49	0.444964	1.76166	0	0.078806	0.993	1902
116	SIGNALING BY MET%REACTOME%R-HSA-6806834.2	58	0.431266	1.76106	0	0.078508	0.993	924
117	POSITIVE REGULATION OF CHROMATIN ORGANIZATION%GOBP%GO:1905269	43	0.445831	1.75771	0.00628931	0.080074	0.994	1764
118	VPR-MEDIATED NUCLEAR IMPORT OF PICS%REACTOME DATABASE ID RELEASE 75%180910	27	0.512331	1.75632	0.00287356	0.0802115	0.996	1205
119	REGULATION OF DENDRITIC SPINE DEVELOPMENT%GOBP%GO:0060998	19	0.553856	1.75244	0.00569801	0.0821363	0.996	102
120	PID_REELIN_PATHWAY%MSIGDB_C2%PID_REELIN_PATHWAY	21	0.548572	1.75037	0.00294118	0.0829893	0.996	408
121	RNA SPLICING%GOBP%GO:0008380	232	0.336577	1.7502	0	0.0823851	0.996	2080
122	PEPTIDYL-THREONINE MODIFICATION%GOBP%GO:0018210	41	0.449258	1.74627	0.00357143	0.0845438	0.997	1388
123	EGF RECEPTOR SIGNALING PATHWAY%PANTHER PATHWAY%P00018	61	0.416672	1.74494	0	0.0846031	0.997	1034
124	EXONUCLEOLYTIC NUCLEAR-TRANSCRIBED MRNA CATABOLIC PROCESS INVOLVED IN DEADENYLATION-DEPENDENT DECAY%GOBP%GO:0043928	27	0.4985	1.74375	0.00549451	0.0847398	0.997	2285
125	CLEAVAGE INVOLVED IN RRNA PROCESSING%GOBP%GO:0000469	16	0.582055	1.73991	0.00819672	0.0868699	0.998	1445
126	ACTIVATED PKN1 STIMULATES TRANSCRIPTION OF AR (ANDROGEN RECEPTOR) REGULATED GENES KLK2 AND KLK3%REACTOME DATABASE ID RELEASE 75%5625886	29	0.489274	1.73952	0.0122699	0.086479	0.998	2112
127	TNF RECEPTOR SIGNALING PATHWAY%PATHWAY INTERACTION DATABASE NCI-NATURE CURATED DATA%TNF RECEPTOR SIGNALING PATHWAY	23	0.521738	1.73754	0.00837989	0.0870846	0.998	802
128	RNA 3'-END PROCESSING%GOBP%GO:0031123	81	0.39261	1.73687	0	0.0869653	0.998	2027
129	REGULATION OF PLASMA MEMBRANE BOUNDED CELL PROJECTION ORGANIZATION%GOBP%GO:0120035	246	0.331239	1.73517	0	0.0875829	0.998	871
130	REGULATION OF CELL PROJECTION ORGANIZATION%GOBP%GO:0031344	249	0.335634	1.7343	0	0.0875254	0.998	871
131	MODIFICATION-DEPENDENT PROTEIN CATABOLIC PROCESS%GOBP%GO:0019941	215	0.342665	1.7331	0	0.0875805	0.998	1716
132	POSITIVE REGULATION OF MICROTUBULE POLYMERIZATION%GOBP%GO:0031116	20	0.545849	1.73107	0.00765306	0.0885693	0.998	1431
133	UBIQUITIN-DEPENDENT PROTEIN CATABOLIC PROCESS%GOBP%GO:0006511	211	0.341927	1.7308	0	0.0880999	0.998	1716
134	EPO%IOB%EPO	27	0.497219	1.72876	0.00571429	0.0888192	0.998	1376
135	THYROTROPIN-RELEASING HORMONE RECEPTOR SIGNALING PATHWAY%PANTHER PATHWAY%P04394	31	0.472106	1.72874	0	0.0881613	0.998	1569
136	SIGNALING BY EGFR%REACTOME%R-HSA-177929.2	38	0.474137	1.72764	0.0031746	0.0881725	0.998	1669
137	BIOCARTA_EGF_PATHWAY%MSIGDB_C2%BIOCARTA_EGF_PATHWAY	20	0.553374	1.72586	0.0139665	0.0887635	0.998	1034
138	REGULATION OF MICROTUBULE-BASED PROCESS%GOBP%GO:0032886	96	0.380622	1.7246	0	0.0891377	0.998	1846
139	TRANSCRIPTIONAL ACTIVITY OF SMAD2 SMAD3:SMAD4 HETEROTRIMER%REACTOME DATABASE ID RELEASE 75%2173793	17	0.567665	1.72391	0.00544959	0.0889526	0.998	1204
140	REGULATION OF MRNA SPLICING, VIA SPLICEOSOME%GOBP%GO:0048024	60	0.411334	1.72109	0	0.0907432	0.999	1790
141	MRNA PROCESSING%GOBP%GO:0006397	246	0.331768	1.72099	0	0.0902389	0.999	2063
142	7Q11.23 COPY NUMBER VARIATION SYNDROME%WIKIPATHWAYS_20210210%WP4932%HOMO SAPIENS	49	0.423835	1.71787	0.00383142	0.0921045	0.999	1306
143	NEPHRIN NEPH1 SIGNALING IN THE KIDNEY PODOCYTE%PATHWAY INTERACTION DATABASE NCI-NATURE CURATED DATA%NEPHRIN NEPH1 SIGNALING IN THE KIDNEY PODOCYTE	19	0.539246	1.71769	0.00826446	0.0916316	0.999	1033
144	NEGATIVE REGULATION OF PROTEIN UBIQUITINATION%GOBP%GO:0031397	33	0.471905	1.7165	0.00607903	0.0918356	0.999	1573
145	ATM SIGNALING NETWORK IN DEVELOPMENT AND DISEASE %WIKIPATHWAYS_20210210%WP3878%HOMO SAPIENS	26	0.50704	1.71557	0.00277778	0.0919295	0.999	1537
146	PID_TNF_PATHWAY%MSIGDB_C2%PID_TNF_PATHWAY	23	0.521738	1.7154	0.00630915	0.0914128	0.999	802
147	POSITIVE REGULATION OF CELL PROJECTION ORGANIZATION%GOBP%GO:0031346	132	0.354925	1.71385	0	0.0917922	0.999	790
148	TRANSPORT OF MATURE MRNA DERIVED FROM AN INTRONLESS TRANSCRIPT%REACTOME%R-HSA-159231.2	33	0.469324	1.71113	0	0.0932892	1	1681
149	REGULATION OF RNA SPLICING%GOBP%GO:0043484	86	0.37729	1.70906	0	0.0941808	1	1207
150	B-WICH COMPLEX POSITIVELY REGULATES RRNA EXPRESSION%REACTOME%R-HSA-5250924.2	43	0.445272	1.70856	0.00692042	0.0938601	1	1291
151	PID_TRAIL_PATHWAY%MSIGDB_C2%PID_TRAIL_PATHWAY	15	0.579643	1.70627	0.0169014	0.0949484	1	579
152	VESICLE DOCKING%GOBP%GO:0048278	34	0.461846	1.70525	0.00319489	0.0951267	1	974
153	ORGANELLE FUSION%GOBP%GO:0048284	62	0.398727	1.70518	0	0.09458	1	1039
154	POSITIVE REGULATION OF RESPONSE TO DNA DAMAGE STIMULUS%GOBP%GO:2001022	39	0.450217	1.70375	0.00342466	0.0951726	1	1803
155	PROXIMAL TUBULE TRANSPORT%WIKIPATHWAYS_20210210%WP4917%HOMO SAPIENS	43	0.436946	1.70327	0	0.0949684	1	2440
156	PID_NEPHRIN_NEPH1_PATHWAY%MSIGDB_C2%PID_NEPHRIN_NEPH1_PATHWAY	19	0.539246	1.69939	0.0123762	0.0974858	1	1033
157	BIOCARTA_VDR_PATHWAY%MSIGDB_C2%BIOCARTA_VDR_PATHWAY	15	0.565764	1.69652	0.0181347	0.0988982	1	1204
158	TRANSPORT OF MATURE MRNAS DERIVED FROM INTRONLESS TRANSCRIPTS%REACTOME DATABASE ID RELEASE 75%159234	33	0.469324	1.694	0.00879765	0.100274	1	1681
159	TERMINATION OF TRANSLESION DNA SYNTHESIS%REACTOME DATABASE ID RELEASE 75%5656169	19	0.552148	1.69396	0.0056338	0.0996844	1	1785
160	ALPHA 6 BETA 4 SIGNALING PATHWAY%WIKIPATHWAYS_20210210%WP244%HOMO SAPIENS	29	0.475847	1.69353	0.0115274	0.0993668	1	1499
161	MITOTIC CYTOKINETIC PROCESS%GOBP%GO:1902410	15	0.589293	1.69102	0.0110193	0.100588	1	1140
162	INSULIN PROCESSING%REACTOME%R-HSA-264876.2	16	0.557853	1.69099	0.0189189	0.0999878	1	1684
163	SUMOYLATION OF SUMOYLATION PROTEINS%REACTOME DATABASE ID RELEASE 75%4085377	26	0.483875	1.6909	0.0060423	0.0994758	1	1112
164	NEGATIVE REGULATION OF INSULIN RECEPTOR SIGNALING PATHWAY%GOBP%GO:0046627	15	0.570933	1.6889	0.0084507	0.100215	1	1035
165	TRAIL SIGNALING PATHWAY%PATHWAY INTERACTION DATABASE NCI-NATURE CURATED DATA%TRAIL SIGNALING PATHWAY	15	0.579643	1.68877	0.0245902	0.0996973	1	579
166	REGULATION OF DENDRITE DEVELOPMENT%GOBP%GO:0050773	33	0.475136	1.68585	0.00308642	0.101479	1	1291
167	IL-4 SIGNALING PATHWAY%WIKIPATHWAYS_20210210%WP395%HOMO SAPIENS	27	0.490167	1.68313	0.00554017	0.103244	1	2187
168	PROTEIN LOCALIZATION TO GOLGI APPARATUS%GOBP%GO:0034067	16	0.569446	1.68279	0.0101781	0.103	1	1717
169	REGULATION OF MICROTUBULE CYTOSKELETON ORGANIZATION%GOBP%GO:0070507	85	0.384875	1.68102	0.00436681	0.104005	1	1613
170	MITOTIC METAPHASE PLATE CONGRESSION%GOBP%GO:0007080	31	0.474633	1.679	0.00597015	0.105118	1	1316
171	HATS ACETYLATE HISTONES%REACTOME DATABASE ID RELEASE 75%3214847	47	0.431472	1.67643	0.00362319	0.106683	1	1192
172	OXYTOCIN RECEPTOR MEDIATED SIGNALING PATHWAY%PANTHER PATHWAY%P04391	31	0.472106	1.67304	0.00655738	0.109082	1	1569
173	DNA DAMAGE TELOMERE STRESS INDUCED SENESCENCE%REACTOME DATABASE ID RELEASE 75%2559586	39	0.445844	1.67146	0.0166113	0.109663	1	1759
174	POSITIVE REGULATION OF MICROTUBULE POLYMERIZATION OR DEPOLYMERIZATION%GOBP%GO:0031112	21	0.514261	1.66967	0.00849858	0.110476	1	1431
175	LEPTIN%IOB%LEPTIN	33	0.45574	1.66897	0.013468	0.11046	1	2184
176	REGULATION OF SIGNALING RECEPTOR ACTIVITY%GOBP%GO:0010469	49	0.407353	1.66653	0	0.111685	1	763
177	TRANSPORT OF MATURE TRANSCRIPT TO CYTOPLASM%REACTOME%R-HSA-72202.2	63	0.399165	1.6664	0.00404858	0.111165	1	2027
178	REGULATION OF HISTONE ACETYLATION%GOBP%GO:0035065	19	0.532779	1.66617	0.0165746	0.110732	1	2184
179	PID_REG_GR_PATHWAY%MSIGDB_C2%PID_REG_GR_PATHWAY	41	0.431357	1.66528	0.0144928	0.110871	1	1333
180	GOLGI TO PLASMA MEMBRANE TRANSPORT%GOBP%GO:0006893	36	0.463982	1.66473	0.00314465	0.110794	1	1862
181	HCMV EARLY EVENTS%REACTOME DATABASE ID RELEASE 75%9609690	67	0.394437	1.66385	0.00434783	0.110877	1	1718
182	NONHOMOLOGOUS END-JOINING (NHEJ)%REACTOME%R-HSA-5693571.1	34	0.456102	1.66249	0.00958466	0.111429	1	1125
183	RECOGNITION OF DNA DAMAGE BY PCNA-CONTAINING REPLICATION COMPLEX%REACTOME DATABASE ID RELEASE 75%110314	20	0.524268	1.66127	0.0117647	0.111777	1	1785
184	HISTONE MRNA METABOLIC PROCESS%GOBP%GO:0008334	16	0.568541	1.65736	0.0110803	0.114248	1	1890
185	ACTIVATION OF RRNA EXPRESSION BY ERCC6 (CSB) AND EHMT2 (G9A)%REACTOME%R-HSA-427389.2	35	0.449831	1.65564	0	0.115056	1	1718
186	EGFR1%IOB%EGFR1	336	0.308313	1.65505	0	0.114999	1	1792
187	POSITIVE REGULATION OF EXOCYTOSIS%GOBP%GO:0045921	42	0.432091	1.65377	0	0.115483	1	1779
188	CHROMOSOME CONDENSATION%GOBP%GO:0030261	26	0.486862	1.65292	0.00283286	0.115572	1	2444
189	GLUCOCORTICOID RECEPTOR REGULATORY NETWORK%PATHWAY INTERACTION DATABASE NCI-NATURE CURATED DATA%GLUCOCORTICOID RECEPTOR REGULATORY NETWORK	41	0.431357	1.6529	0.00677966	0.115004	1	1333
190	INORGANIC ANION TRANSMEMBRANE TRANSPORT%GOBP%GO:0098661	15	0.578539	1.65279	0.0344828	0.114493	1	1639
191	PRIMARY FOCAL SEGMENTAL GLOMERULOSCLEROSIS FSGS%WIKIPATHWAYS_20210210%WP2572%HOMO SAPIENS	54	0.408417	1.65133	0.00406504	0.115256	1	1731
192	MRNA 3'-END PROCESSING%REACTOME%R-HSA-72187.4	45	0.41885	1.65123	0.0075188	0.114749	1	2027
193	REGULATION OF GTPASE ACTIVITY%GOBP%GO:0043087	113	0.349275	1.65012	0	0.115095	1	790
194	MITOTIC PROPHASE%REACTOME%R-HSA-68875.4	76	0.376232	1.6496	0.00833333	0.115051	1	1722
195	DNA METHYLATION%REACTOME%R-HSA-5334118.1	27	0.478392	1.64932	0.0058997	0.114756	1	2263
196	RESPONSE TO AMINO ACID%GOBP%GO:0043200	17	0.55171	1.64917	0.013624	0.114338	1	362
197	NEGATIVE REGULATION OF TYPE I INTERFERON PRODUCTION%GOBP%GO:0032480	18	0.536784	1.64837	0.0169972	0.114424	1	1215
198	POSITIVE REGULATION OF TRANSCRIPTION BY RNA POLYMERASE I%GOBP%GO:0045943	15	0.553812	1.64211	0.0159574	0.11984	1	1925
199	IL-1 SIGNALING PATHWAY%WIKIPATHWAYS_20210210%WP195%HOMO SAPIENS	28	0.461284	1.63854	0.00322581	0.122419	1	2187
200	RRNA MODIFICATION IN THE NUCLEUS AND CYTOSOL%REACTOME%R-HSA-6790901.4	46	0.41324	1.63831	0.00977199	0.121971	1	1472
201	BIOCARTA_KERATINOCYTE_PATHWAY%MSIGDB_C2%BIOCARTA_KERATINOCYTE_PATHWAY	21	0.508486	1.63825	0.017192	0.12138	1	1777
202	GAP-FILLING DNA REPAIR SYNTHESIS AND LIGATION IN GG-NER%REACTOME%R-HSA-5696397.1	18	0.538727	1.63666	0.0138504	0.122254	1	1803
203	POSITIVE REGULATION OF RNA SPLICING%GOBP%GO:0033120	23	0.499449	1.63618	0.0176991	0.122135	1	1334
204	ALPHA6BETA4INTEGRIN%NETPATH%ALPHA6BETA4INTEGRIN	55	0.39579	1.63614	0.0156863	0.121561	1	2371
205	SPLICEOSOMAL COMPLEX ASSEMBLY%GOBP%GO:0000245	37	0.446817	1.63479	0.00630915	0.122238	1	2290
206	CD40%IOB%CD40	18	0.529878	1.63475	0.0261628	0.121683	1	1034
207	ENDOMEMBRANE SYSTEM ORGANIZATION%GOBP%GO:0010256	253	0.318614	1.63344	0	0.122325	1	1650
208	TRANSPORT OF RIBONUCLEOPROTEINS INTO THE HOST NUCLEUS%REACTOME DATABASE ID RELEASE 75%168271	25	0.477371	1.63144	0.0170455	0.123508	1	1112
209	CHLORIDE TRANSPORT%GOBP%GO:0006821	19	0.511653	1.63073	0.0334262	0.123552	1	1351
210	POSITIVE REGULATION OF ADHERENS JUNCTION ORGANIZATION%GOBP%GO:1903393	21	0.504948	1.62892	0.0164384	0.124624	1	815
211	TRANSPORT OF MATURE MRNA DERIVED FROM AN INTRON-CONTAINING TRANSCRIPT%REACTOME%R-HSA-159236.3	57	0.389236	1.62884	0	0.124134	1	1408
212	METAPHASE PLATE CONGRESSION%GOBP%GO:0051310	33	0.448521	1.62803	0.0175439	0.124354	1	1316
213	ENDOSOME TO LYSOSOME TRANSPORT%GOBP%GO:0008333	27	0.466447	1.62581	0.00898204	0.125733	1	980
214	STRESS GRANULE ASSEMBLY%GOBP%GO:0034063	17	0.547011	1.62571	0.0261628	0.125215	1	2767
215	POSITIVE REGULATION OF INTRACELLULAR TRANSPORT%GOBP%GO:0032388	112	0.355639	1.62381	0	0.12641	1	1605
216	REGULATION OF MRNA 3'-END PROCESSING%GOBP%GO:0031440	20	0.513707	1.6233	0.0112045	0.126384	1	1485
217	REGULATION OF FILOPODIUM ASSEMBLY%GOBP%GO:0051489	25	0.485044	1.62262	0.011396	0.126421	1	812
218	MATURATION OF 5.8S RRNA%GOBP%GO:0000460	22	0.490415	1.61924	0.00874636	0.129033	1	1409
219	BIOCARTA_AGR_PATHWAY%MSIGDB_C2%BIOCARTA_AGR_PATHWAY	20	0.512084	1.61745	0.0138889	0.130036	1	1724
220	NEGATIVE REGULATION OF PROTEIN MODIFICATION BY SMALL PROTEIN CONJUGATION OR REMOVAL%GOBP%GO:1903321	37	0.431992	1.6165	0.00980392	0.130346	1	1573
221	RAB REGULATION OF TRAFFICKING%REACTOME DATABASE ID RELEASE 75%9007101	67	0.385481	1.61581	0	0.130364	1	2032
222	NUCLEUS ORGANIZATION%GOBP%GO:0006997	79	0.367645	1.61409	0	0.131525	1	1364
223	NUCLEAR ENVELOPE BREAKDOWN%REACTOME%R-HSA-2980766.2	34	0.438888	1.61189	0.00295858	0.132891	1	1364
224	MTORC1-MEDIATED SIGNALLING%REACTOME%R-HSA-166208.3	18	0.514512	1.61065	0.0298103	0.133358	1	1558
225	INSULIN SIGNALING%WIKIPATHWAYS_20210210%WP481%HOMO SAPIENS	79	0.366577	1.61011	0.00408163	0.133252	1	2504
226	MEMBRANE FUSION%GOBP%GO:0061025	82	0.36357	1.60966	0	0.133081	1	1570
227	ANTIVIRAL MECHANISM BY IFN-STIMULATED GENES%REACTOME%R-HSA-1169410.4	61	0.38325	1.60916	0.00403226	0.132986	1	1215
228	ALPHA6BETA4INTEGRIN%IOB%ALPHA6BETA4INTEGRIN	52	0.398474	1.60854	0	0.133021	1	2371
229	DNA DAMAGE BYPASS%REACTOME DATABASE ID RELEASE 75%73893	28	0.468755	1.60845	0.0219436	0.132539	1	1785
230	RNA LOCALIZATION%GOBP%GO:0006403	120	0.347801	1.60829	0	0.13212	1	2027
231	ISG15 ANTIVIRAL MECHANISM%REACTOME%R-HSA-1169408.2	57	0.389143	1.60828	0.003861	0.131562	1	1215
232	BASE EXCISION REPAIR%REACTOME DATABASE ID RELEASE 75%73884	47	0.402417	1.60772	0.00369004	0.131468	1	1803
233	PROTEOLYSIS INVOLVED IN CELLULAR PROTEIN CATABOLIC PROCESS%GOBP%GO:0051603	252	0.30847	1.60739	0	0.131275	1	1716
234	REGULATION OF HEART MORPHOGENESIS%GOBP%GO:2000826	15	0.543744	1.60478	0.0430108	0.133296	1	1000
235	RETINOBLASTOMA GENE IN CANCER%WIKIPATHWAYS_20210210%WP2446%HOMO SAPIENS	45	0.414197	1.60391	0.00946372	0.133604	1	1785
236	NON-GENOMIC ACTIONS OF 1,25 DIHYDROXYVITAMIN D3%WIKIPATHWAYS_20210210%WP4341%HOMO SAPIENS	34	0.440193	1.60267	0.0131579	0.134264	1	1597
237	LYSOSOMAL TRANSPORT%GOBP%GO:0007041	60	0.388969	1.60226	0.00344828	0.134126	1	1723
238	PROTEIN-CONTAINING COMPLEX DISASSEMBLY%GOBP%GO:0032984	117	0.34071	1.60141	0.00628931	0.1343	1	1927
239	CARGO TRAFFICKING TO THE PERICILIARY MEMBRANE%REACTOME%R-HSA-5620920.3	27	0.481461	1.60116	0.0306748	0.134005	1	982
240	NEGATIVE REGULATION OF CELLULAR RESPONSE TO INSULIN STIMULUS%GOBP%GO:1900077	16	0.53228	1.60063	0.0218579	0.133928	1	1035
241	MEMBRANE TRAFFICKING%REACTOME%R-HSA-199991.6	407	0.293487	1.59803	0	0.135953	1	1746
242	TNF SIGNALING%REACTOME%R-HSA-75893.5	17	0.528837	1.59723	0.010929	0.136089	1	1063
243	SCAVENGING BY CLASS A RECEPTORS%REACTOME DATABASE ID RELEASE 75%3000480	15	0.540192	1.59666	0.0398936	0.136006	1	1265
244	TRANSPORT OF THE SLBP INDEPENDENT MATURE MRNA%REACTOME%R-HSA-159227.2	28	0.458191	1.59648	0.0117647	0.135589	1	1408
245	CONDENSATION OF PROPHASE CHROMOSOMES%REACTOME%R-HSA-2299718.2	31	0.450869	1.59631	0.0220126	0.135223	1	2343
246	EGF/EGFR SIGNALING PATHWAY%WIKIPATHWAYS_20210210%WP437%HOMO SAPIENS	106	0.341304	1.59479	0.005291	0.136221	1	1193
247	CELLULAR PROTEIN CATABOLIC PROCESS%GOBP%GO:0044257	267	0.299825	1.59271	0	0.137533	1	1723
248	CHROMATIN ASSEMBLY OR DISASSEMBLY%GOBP%GO:0006333	71	0.36414	1.59066	0.0122951	0.138881	1	1808
249	CILIARY LANDSCAPE%WIKIPATHWAYS_20210210%WP4352%HOMO SAPIENS	138	0.329771	1.58943	0	0.139591	1	2127
250	EGFR1%NETPATH%EGFR1	340	0.30276	1.58929	0	0.139171	1	1792
251	VIRAL GENOME REPLICATION%GOBP%GO:0019079	19	0.510397	1.58886	0.0196078	0.139027	1	584
252	REGULATION OF INTRACELLULAR STEROID HORMONE RECEPTOR SIGNALING PATHWAY%GOBP%GO:0033143	35	0.421471	1.58779	0.00322581	0.13955	1	1387
253	NEGATIVE REGULATION OF SUPRAMOLECULAR FIBER ORGANIZATION%GOBP%GO:1902904	79	0.357781	1.58715	0.00892857	0.139619	1	1764
254	NUCLEIC ACID PHOSPHODIESTER BOND HYDROLYSIS%GOBP%GO:0090305	85	0.361173	1.58205	0.00995025	0.14396	1	1963
255	DOWNREGULATION OF TGF-BETA RECEPTOR SIGNALING%REACTOME DATABASE ID RELEASE 75%2173788	16	0.549516	1.58089	0.0296296	0.144572	1	1278
256	LEPTIN%NETPATH%LEPTIN	59	0.383915	1.58006	0.00769231	0.144791	1	1777
257	PROTEIN SUMOYLATION%GOBP%GO:0016925	32	0.433021	1.57971	0.0368098	0.144569	1	1334
258	NUCLEOTIDE-EXCISION REPAIR, DNA GAP FILLING%GOBP%GO:0006297	17	0.523032	1.57965	0.025788	0.144085	1	1803
259	PID_ERBB1_INTERNALIZATION_PATHWAY%MSIGDB_C2%PID_ERBB1_INTERNALIZATION_PATHWAY	33	0.436377	1.5792	0.0159236	0.143965	1	1779
260	NUCLEAR ENVELOPE ORGANIZATION%GOBP%GO:0006998	55	0.392165	1.57835	0.012	0.144271	1	1364
261	SIRT1 NEGATIVELY REGULATES RRNA EXPRESSION%REACTOME DATABASE ID RELEASE 75%427359	26	0.448726	1.57309	0.0248619	0.149181	1	2112
262	REGULATION OF VACUOLE ORGANIZATION%GOBP%GO:0044088	24	0.468287	1.57092	0.0263158	0.150837	1	914
263	TRANSPORT OF THE SLBP DEPENDANT MATURE MRNA%REACTOME DATABASE ID RELEASE 75%159230	28	0.458191	1.56936	0.0248447	0.151817	1	1408
264	INTERNALIZATION OF ERBB1%PATHWAY INTERACTION DATABASE NCI-NATURE CURATED DATA%INTERNALIZATION OF ERBB1	33	0.436377	1.56903	0.028481	0.151564	1	1779
265	TRANSLESION SYNTHESIS BY Y FAMILY DNA POLYMERASES BYPASSES LESIONS ON DNA TEMPLATE%REACTOME%R-HSA-110313.1	23	0.481174	1.56854	0.0151976	0.151475	1	1785
266	MRNA 3'-END PROCESSING%GOBP%GO:0031124	58	0.379406	1.56825	0.00760456	0.151232	1	2027
267	BIOCARTA_VEGF_PATHWAY%MSIGDB_C2%BIOCARTA_VEGF_PATHWAY	23	0.464778	1.56706	0.0179641	0.151812	1	991
268	NEGATIVE REGULATION OF CELLULAR RESPONSE TO TRANSFORMING GROWTH FACTOR BETA STIMULUS%GOBP%GO:1903845	31	0.431157	1.56695	0.0151057	0.151356	1	1183
269	VESICLE-MEDIATED TRANSPORT%REACTOME DATABASE ID RELEASE 75%5653656	439	0.286132	1.56678	0	0.150921	1	1746
270	INTERLEUKIN-2 FAMILY SIGNALING%REACTOME%R-HSA-451927.5	17	0.527828	1.56358	0.0376344	0.153715	1	604
271	ESTABLISHMENT OF CHROMOSOME LOCALIZATION%GOBP%GO:0051303	36	0.424025	1.5634	0.0283019	0.153293	1	1316
272	RETROGRADE TRANSPORT, ENDOSOME TO PLASMA MEMBRANE%GOBP%GO:1990126	18	0.495559	1.56173	0.0205882	0.154334	1	1907
273	NUCLEAR PORE COMPLEX (NPC) DISASSEMBLY%REACTOME%R-HSA-3301854.2	27	0.460867	1.56117	0.0128617	0.154386	1	1316
274	EGFR DOWNREGULATION%REACTOME%R-HSA-182971.6	21	0.47135	1.56096	0.0261628	0.154014	1	1669
275	INTERLEUKIN-11 SIGNALING PATHWAY%WIKIPATHWAYS_20210210%WP2332%HOMO SAPIENS	29	0.434012	1.55782	0.0179104	0.156767	1	1240
276	POSITIVE REGULATION OF INTRACELLULAR PROTEIN TRANSPORT%GOBP%GO:0090316	79	0.350031	1.55691	0.00431035	0.157032	1	1605
277	APOPTOTIC EXECUTION PHASE%REACTOME DATABASE ID RELEASE 75%75153	44	0.403426	1.55609	0.0109091	0.157278	1	1759
278	METABOTROPIC GLUTAMATE RECEPTOR GROUP II PATHWAY%PANTHER PATHWAY%P00040	23	0.464405	1.55573	0.024024	0.157091	1	678
279	CLEAVAGE OF THE DAMAGED PURINE%REACTOME DATABASE ID RELEASE 75%110331	27	0.439594	1.55543	0.0122699	0.156826	1	2263
280	MTOR SIGNALLING%REACTOME%R-HSA-165159.6	27	0.442981	1.55447	0.03125	0.157272	1	1603
281	REGULATION OF CELL MORPHOGENESIS INVOLVED IN DIFFERENTIATION%GOBP%GO:0010769	126	0.329115	1.55361	0	0.157611	1	790
282	INORGANIC ANION TRANSPORT%GOBP%GO:0015698	28	0.444414	1.55305	0.0303951	0.15769	1	1913
283	MUSCARINIC ACETYLCHOLINE RECEPTOR 1 AND 3 SIGNALING PATHWAY%PANTHER PATHWAY%P00042	30	0.440277	1.55129	0.0273556	0.159023	1	1525
284	MULTI-MULTICELLULAR ORGANISM PROCESS%GOBP%GO:0044706	15	0.51599	1.5505	0.0394737	0.159267	1	707
285	ESTABLISHMENT OF PROTEIN LOCALIZATION TO PLASMA MEMBRANE%GOBP%GO:0061951	30	0.436661	1.54847	0.0184615	0.160867	1	1994
286	TRANSLESION SYNTHESIS BY POLH%REACTOME DATABASE ID RELEASE 75%110320	15	0.519819	1.54724	0.0255102	0.161666	1	1785
287	NUCLEOSOME ORGANIZATION%GOBP%GO:0034728	68	0.357669	1.54573	0	0.16277	1	1808
288	SUMOYLATION OF DNA REPLICATION PROTEINS%REACTOME DATABASE ID RELEASE 75%4615885	31	0.439671	1.5457	0.026393	0.162239	1	1359
289	CHROMOSOME LOCALIZATION%GOBP%GO:0050000	37	0.419556	1.54539	0.00314465	0.161971	1	1316
290	REGULATION OF PROTEIN AUTOPHOSPHORYLATION%GOBP%GO:0031952	26	0.444623	1.54495	0.0297619	0.161841	1	1030
291	CYTOPLASMIC TRANSLATIONAL INITIATION%GOBP%GO:0002183	18	0.500579	1.5447	0.0357143	0.161532	1	2242
292	RNA POLYMERASE I PROMOTER OPENING%REACTOME DATABASE ID RELEASE 75%73728	28	0.438724	1.54221	0.0126582	0.163838	1	2263
293	POSITIVE REGULATION OF GENE EXPRESSION, EPIGENETIC%GOBP%GO:0045815	31	0.427809	1.54181	0.0268456	0.163791	1	1259
294	REGULATION OF MRNA METABOLIC PROCESS%GOBP%GO:1903311	211	0.305392	1.54014	0	0.165024	1	2080
295	G-CSF%IOB%G-CSF	28	0.448753	1.53891	0.0261438	0.165797	1	604
296	KIT RECEPTOR SIGNALING PATHWAY%WIKIPATHWAYS_20210210%WP304%HOMO SAPIENS	34	0.411257	1.53792	0.0294118	0.16651	1	1174
297	MEIOSIS%REACTOME%R-HSA-1500620.2	52	0.380297	1.53733	0.0267176	0.166582	1	1857
298	PID_IGF1_PATHWAY%MSIGDB_C2%PID_IGF1_PATHWAY	23	0.456187	1.53538	0.025	0.168338	1	705
299	REGULATION OF CELLULAR RESPONSE TO INSULIN STIMULUS%GOBP%GO:1900076	24	0.45408	1.53484	0.0455927	0.168399	1	1035
300	THE EFFECT OF PROGERIN ON THE INVOLVED GENES IN HUTCHINSON-GILFORD PROGERIA SYNDROME%WIKIPATHWAYS_20210210%WP4320%HOMO SAPIENS	17	0.50804	1.53461	0.0437018	0.16811	1	1204
301	REGULATION OF CYTOKINESIS%GOBP%GO:0032465	31	0.42977	1.53317	0.0369231	0.16924	1	1255
302	BASE-EXCISION REPAIR, AP SITE FORMATION%REACTOME%R-HSA-73929.2	27	0.439594	1.53266	0.0214724	0.169288	1	2263
303	ANGIOPOIETIN LIKE PROTEIN 8 REGULATORY PATHWAY%WIKIPATHWAYS_20210210%WP3915%HOMO SAPIENS	53	0.377753	1.53175	0.0147059	0.16979	1	1034
304	ORGANELLE ASSEMBLY%GOBP%GO:0070925	296	0.288095	1.53026	0	0.170949	1	1723
305	BIOCARTA_GH_PATHWAY%MSIGDB_C2%BIOCARTA_GH_PATHWAY	18	0.498177	1.52887	0.0297297	0.17204	1	1034
306	REGULATION OF NEURON PROJECTION DEVELOPMENT%GOBP%GO:0010975	157	0.310594	1.5286	0.00833333	0.171755	1	790
307	PID_FCER1_PATHWAY%MSIGDB_C2%PID_FCER1_PATHWAY	40	0.400099	1.52798	0.0131579	0.171909	1	341
308	HIV LIFE CYCLE%REACTOME%R-HSA-162587.2	106	0.333106	1.5275	0	0.171954	1	1207
309	RNA PROCESSING%GOBP%GO:0006396	480	0.271714	1.52634	0	0.172799	1	1485
310	P53 PATHWAY%PATHWAY INTERACTION DATABASE NCI-NATURE CURATED DATA%P53 PATHWAY	35	0.411583	1.5263	0.0162338	0.172263	1	1586
311	NEGATIVE REGULATION OF PROTEIN KINASE ACTIVITY%GOBP%GO:0006469	73	0.353858	1.52622	0	0.171836	1	2148
312	POSITIVE REGULATION OF VIRAL LIFE CYCLE%GOBP%GO:1903902	45	0.398605	1.5254	0.0206186	0.172242	1	1140
313	REGULATION OF VIRAL LIFE CYCLE%GOBP%GO:1903900	80	0.345726	1.52502	0.00497512	0.172134	1	1554
314	DNA REPLICATION%WIKIPATHWAYS_20210210%WP466%HOMO SAPIENS	23	0.457993	1.52443	0.0421687	0.172294	1	1785
315	DEPURINATION%REACTOME DATABASE ID RELEASE 75%73927	27	0.439594	1.52441	0.0308123	0.171758	1	2263
316	DNA PACKAGING%GOBP%GO:0006323	80	0.344673	1.52314	0.00913242	0.172785	1	1463
317	NEGATIVE REGULATION OF TRANSFERASE ACTIVITY%GOBP%GO:0051348	96	0.330928	1.52259	0.00558659	0.172858	1	1573
318	REGULATION OF PROTEIN TARGETING TO MITOCHONDRION%GOBP%GO:1903214	16	0.509849	1.5222	0.0446194	0.172818	1	1507
319	NUCLEAR-TRANSCRIBED MRNA CATABOLIC PROCESS, EXONUCLEOLYTIC%GOBP%GO:0000291	29	0.434686	1.52211	0.0225989	0.172338	1	1943
320	NUCLEIC ACID TRANSPORT%GOBP%GO:0050657	104	0.326689	1.522	0.00558659	0.171887	1	2027
321	RECOGNITION AND ASSOCIATION OF DNA GLYCOSYLASE WITH SITE CONTAINING AN AFFECTED PYRIMIDINE%REACTOME%R-HSA-110328.2	26	0.440604	1.51891	0.0361446	0.17486	1	2263
322	RECOGNITION AND ASSOCIATION OF DNA GLYCOSYLASE WITH SITE CONTAINING AN AFFECTED PURINE%REACTOME%R-HSA-110330.3	27	0.439594	1.51873	0.0292398	0.174546	1	2263
323	METABOLISM OF RNA%REACTOME%R-HSA-8953854.4	498	0.266321	1.51865	0	0.174106	1	2315
324	REGULATION OF TRANSCRIPTION BY RNA POLYMERASE I%GOBP%GO:0006356	19	0.489751	1.5172	0.022409	0.175322	1	2043
325	IFN-ALPHA%IOB%IFN-ALPHA	24	0.447352	1.51684	0.0463768	0.1752	1	1376
326	REGULATION OF EPIDERMAL GROWTH FACTOR RECEPTOR SIGNALING PATHWAY%GOBP%GO:0042058	48	0.37826	1.51547	0.00687285	0.176218	1	1723
327	CELLULAR RESPONSE TO AMINO ACID STIMULUS%GOBP%GO:0071230	16	0.513996	1.51542	0.0404624	0.175739	1	362
328	ERBB2 SIGNALING PATHWAY%GOBP%GO:0038128	17	0.495439	1.51521	0.0494506	0.175491	1	188
329	LATE PHASE OF HIV LIFE CYCLE%REACTOME%R-HSA-162599.2	96	0.333993	1.515	0.00490196	0.175256	1	1207
330	PID_P53_REGULATION_PATHWAY%MSIGDB_C2%PID_P53_REGULATION_PATHWAY	35	0.411583	1.51469	0.034375	0.175132	1	1586
331	NEGATIVE REGULATION OF TRANSFORMING GROWTH FACTOR BETA RECEPTOR SIGNALING PATHWAY%GOBP%GO:0030512	31	0.431157	1.51392	0.0192308	0.17562	1	1183
332	REGULATION OF TUMOR NECROSIS FACTOR-MEDIATED SIGNALING PATHWAY%GOBP%GO:0010803	23	0.466609	1.51372	0.0283286	0.175343	1	1063
333	RNA TRANSPORT%GOBP%GO:0050658	104	0.326689	1.51183	0	0.176801	1	2027
334	RRNA PROCESSING%GOBP%GO:0006364	156	0.303141	1.51148	0.0120482	0.176645	1	881
335	PACKAGING OF TELOMERE ENDS%REACTOME DATABASE ID RELEASE 75%171306	26	0.440604	1.51057	0.0365854	0.177207	1	2263
336	3-PHOSPHOINOSITIDE BIOSYNTHESIS%HUMANCYC%PWY-6352	15	0.520181	1.50865	0.0591398	0.1787	1	402
337	REGULATION OF EARLY ENDOSOME TO LATE ENDOSOME TRANSPORT%GOBP%GO:2000641	18	0.480456	1.50841	0.048	0.178511	1	1300
338	HDR THROUGH HOMOLOGOUS RECOMBINATION (HRR) OR SINGLE STRAND ANNEALING (SSA)%REACTOME%R-HSA-5693567.2	53	0.368861	1.50812	0.0264151	0.178266	1	1125
339	CYTOSOLIC TRANSPORT%GOBP%GO:0016482	88	0.335437	1.50793	0.00512821	0.177932	1	1723
340	DNA MISMATCH REPAIR%WIKIPATHWAYS_20210210%WP531%HOMO SAPIENS	16	0.499568	1.50741	0.0511509	0.177974	1	1785
341	PID_PI3K_PLC_TRK_PATHWAY%MSIGDB_C2%PID_PI3K_PLC_TRK_PATHWAY	24	0.441216	1.5071	0.0369231	0.177899	1	1291
342	INTERACTION WITH HOST%GOBP%GO:0051701	77	0.344932	1.50564	0	0.179188	1	1731
343	ESTABLISHMENT OF RNA LOCALIZATION%GOBP%GO:0051236	106	0.329628	1.50499	0.00925926	0.179376	1	2027
344	POSITIVE REGULATION OF PROTEIN TARGETING TO MITOCHONDRION%GOBP%GO:1903955	15	0.515915	1.50382	0.0533333	0.180228	1	1507
345	APOPTOTIC CLEAVAGE OF CELLULAR PROTEINS%REACTOME%R-HSA-111465.3	31	0.421109	1.5037	0.0328947	0.179833	1	1715
346	IL3-MEDIATED SIGNALING EVENTS%PATHWAY INTERACTION DATABASE NCI-NATURE CURATED DATA%IL3-MEDIATED SIGNALING EVENTS	15	0.512984	1.5035	0.0455764	0.179557	1	1204
347	CLEAVAGE OF THE DAMAGED PYRIMIDINE%REACTOME DATABASE ID RELEASE 75%110329	26	0.440604	1.5031	0.0289855	0.179558	1	2263
348	RNA PHOSPHODIESTER BOND HYDROLYSIS%GOBP%GO:0090501	44	0.382438	1.50238	0.0172414	0.179965	1	1948
349	HOMOLOGY DIRECTED REPAIR%REACTOME%R-HSA-5693538.2	57	0.35693	1.50033	0.00803213	0.181994	1	1803
350	IL-2 SIGNALING PATHWAY%WIKIPATHWAYS_20210210%WP49%HOMO SAPIENS	26	0.454326	1.49787	0.0356083	0.184425	1	1380
351	MRNA EXPORT FROM NUCLEUS%GOBP%GO:0006406	80	0.339146	1.49495	0.00930233	0.187648	1	2027
352	MRNA-CONTAINING RIBONUCLEOPROTEIN COMPLEX EXPORT FROM NUCLEUS%GOBP%GO:0071427	80	0.339146	1.49471	0.00925926	0.187389	1	2027
353	FC-EPSILON RECEPTOR I SIGNALING IN MAST CELLS%PATHWAY INTERACTION DATABASE NCI-NATURE CURATED DATA%FC-EPSILON RECEPTOR I SIGNALING IN MAST CELLS	41	0.394306	1.49389	0.0109489	0.187812	1	341
354	MEIOTIC SYNAPSIS%REACTOME%R-HSA-1221632.1	38	0.400457	1.49209	0.0429448	0.189363	1	2112
355	POSITIVE REGULATION OF PROTEIN CATABOLIC PROCESS%GOBP%GO:0045732	85	0.340414	1.49198	0.00483092	0.188958	1	1291
356	RIBONUCLEOPROTEIN COMPLEX BIOGENESIS%GOBP%GO:0022613	290	0.285622	1.49041	0	0.190312	1	1488
357	NEGATIVE REGULATION OF KINASE ACTIVITY%GOBP%GO:0033673	82	0.341038	1.49009	0.00985222	0.190223	1	1566
358	PID_ERBB1_RECEPTOR_PROXIMAL_PATHWAY%MSIGDB_C2%PID_ERBB1_RECEPTOR_PROXIMAL_PATHWAY	30	0.413788	1.48985	0.0382166	0.189946	1	445
359	DEPYRIMIDINATION%REACTOME DATABASE ID RELEASE 75%73928	26	0.440604	1.48934	0.0494186	0.19005	1	2263
360	DNA DOUBLE-STRAND BREAK REPAIR%REACTOME%R-HSA-5693532.3	70	0.343182	1.48919	0.0180995	0.18976	1	1125
361	DEFECTIVE TPR MAY CONFER SUSCEPTIBILITY TOWARDS THYROID PAPILLARY CARCINOMA (TPC)%REACTOME%R-HSA-5619107.2	23	0.447786	1.48768	0.0324484	0.190992	1	1112
362	LAGGING STRAND SYNTHESIS%REACTOME DATABASE ID RELEASE 75%69186	15	0.520926	1.48765	0.0574413	0.190492	1	1785
363	TRANSLESION SYNTHESIS%GOBP%GO:0019985	23	0.436473	1.48719	0.0344828	0.190622	1	1785
364	REPRODUCTION%REACTOME DATABASE ID RELEASE 75%1474165	56	0.361069	1.48666	0.0223881	0.19082	1	1785
365	REGULATION OF TOR SIGNALING%GOBP%GO:0032006	35	0.402125	1.48661	0.0382166	0.190347	1	1172
366	REGULATION OF ERBB SIGNALING PATHWAY%GOBP%GO:1901184	51	0.372795	1.48599	0.0180505	0.19055	1	1755
367	POSITIVE REGULATION OF PROTEIN TYROSINE KINASE ACTIVITY%GOBP%GO:0061098	19	0.474067	1.48586	0.0360111	0.190182	1	238
368	BIOCARTA_GLEEVEC_PATHWAY%MSIGDB_C2%BIOCARTA_GLEEVEC_PATHWAY	15	0.502002	1.48444	0.0546875	0.191498	1	1034
369	NCRNA CATABOLIC PROCESS%GOBP%GO:0034661	22	0.45297	1.48344	0.0457143	0.192194	1	1409
370	DEADENYLATION-DEPENDENT MRNA DECAY%REACTOME%R-HSA-429914.2	44	0.385766	1.48337	0.0144404	0.191782	1	2311
371	PROTEIN-DNA COMPLEX DISASSEMBLY%GOBP%GO:0032986	15	0.511559	1.48329	0.046832	0.191374	1	1352
372	MATURATION OF LSU-RRNA%GOBP%GO:0000470	19	0.477369	1.48276	0.0505051	0.191514	1	1625
373	TRANSLOCATION OF SLC2A4 (GLUT4) TO THE PLASMA MEMBRANE%REACTOME DATABASE ID RELEASE 75%1445148	39	0.390665	1.48199	0.0216049	0.191994	1	2506
374	ERBB SIGNALING PATHWAY%WIKIPATHWAYS_20210210%WP673%HOMO SAPIENS	46	0.377736	1.48173	0.0169492	0.191774	1	1034
375	LISTERIA MONOCYTOGENES ENTRY INTO HOST CELLS%REACTOME%R-HSA-8876384.1	17	0.484405	1.48101	0.0397878	0.192134	1	2427
376	MRNA TRANSPORT%GOBP%GO:0051028	82	0.339996	1.48067	0.0132743	0.191967	1	2027
377	TRK RECEPTOR SIGNALING MEDIATED BY PI3K AND PLC-GAMMA%PATHWAY INTERACTION DATABASE NCI-NATURE CURATED DATA%TRK RECEPTOR SIGNALING MEDIATED BY PI3K AND PLC-GAMMA	24	0.441216	1.48053	0.0383481	0.191623	1	1291
378	REGULATION OF GLUCOKINASE BY GLUCOKINASE REGULATORY PROTEIN%REACTOME%R-HSA-170822.3	23	0.447786	1.47965	0.0437318	0.192073	1	1112
379	IL6%NETPATH%IL6	52	0.366399	1.47943	0.0209059	0.191787	1	1333
380	REGULATION OF PROTEIN MODIFICATION BY SMALL PROTEIN CONJUGATION OR REMOVAL%GOBP%GO:1903320	95	0.327168	1.47894	0.0147059	0.191859	1	1617
381	SUMOYLATION OF UBIQUITINYLATION PROTEINS%REACTOME%R-HSA-3232142.3	26	0.43253	1.4788	0.0244565	0.191489	1	1112
382	RIBONUCLEOPROTEIN COMPLEX SUBUNIT ORGANIZATION%GOBP%GO:0071826	152	0.301972	1.47837	0.00625	0.191442	1	2316
383	RIBONUCLEOPROTEIN COMPLEX LOCALIZATION%GOBP%GO:0071166	92	0.325444	1.47782	0.00483092	0.191615	1	2027
384	REGULATION OF ACTIN NUCLEATION%GOBP%GO:0051125	19	0.470214	1.47661	0.0581717	0.192639	1	978
385	PID_CERAMIDE_PATHWAY%MSIGDB_C2%PID_CERAMIDE_PATHWAY	25	0.430449	1.47475	0.0294985	0.194422	1	1034
386	TNFALPHA%NETPATH%TNFALPHA	174	0.297256	1.47365	0	0.195253	1	1405
387	REGULATION OF CELLULAR COMPONENT BIOGENESIS%GOBP%GO:0044087	466	0.265719	1.47339	0	0.195065	1	1656
388	REGULATION OF NEURON DIFFERENTIATION%GOBP%GO:0045664	176	0.299011	1.47332	0.00729927	0.19465	1	790
389	D-<I>MYO< I>-INOSITOL (1,4,5)-TRISPHOSPHATE BIOSYNTHESIS%HUMANCYC%PWY-6351	18	0.477156	1.47298	0.0535714	0.194548	1	1529
390	VESICLE TARGETING, ROUGH ER TO CIS-GOLGI%GOBP%GO:0048207	46	0.369416	1.47253	0.0107527	0.194568	1	2454
391	RRNA METABOLIC PROCESS%GOBP%GO:0016072	169	0.295338	1.47197	0	0.194762	1	1225
392	PID_AR_NONGENOMIC_PATHWAY%MSIGDB_C2%PID_AR_NONGENOMIC_PATHWAY	25	0.436099	1.47163	0.045977	0.194699	1	1412
393	CERAMIDE SIGNALING PATHWAY%PATHWAY INTERACTION DATABASE NCI-NATURE CURATED DATA%CERAMIDE SIGNALING PATHWAY	27	0.421508	1.46995	0.0537313	0.19643	1	1034
394	U12 DEPENDENT SPLICING%REACTOME DATABASE ID RELEASE 75%72165	41	0.386511	1.4696	0.0207612	0.196388	1	1774
395	EGF RECEPTOR (ERBB1) SIGNALING PATHWAY%PATHWAY INTERACTION DATABASE NCI-NATURE CURATED DATA%EGF RECEPTOR (ERBB1) SIGNALING PATHWAY	30	0.413788	1.46928	0.0404984	0.196342	1	445
396	POSITIVE REGULATION OF PROTEASOMAL PROTEIN CATABOLIC PROCESS%GOBP%GO:1901800	35	0.396322	1.46893	0.0383481	0.196249	1	1864
397	INTEGRATED CANCER PATHWAY%WIKIPATHWAYS_20210210%WP1971%HOMO SAPIENS	21	0.45596	1.46854	0.0604396	0.196222	1	1025
398	RIBONUCLEOPROTEIN COMPLEX ASSEMBLY%GOBP%GO:0022618	146	0.304066	1.46787	0	0.19656	1	2316
399	MEIOTIC RECOMBINATION%REACTOME%R-HSA-912446.2	38	0.385365	1.46523	0.0272109	0.199374	1	1785
400	DEPOSITION OF NEW CENPA-CONTAINING NUCLEOSOMES AT THE CENTROMERE%REACTOME DATABASE ID RELEASE 75%606279	30	0.410547	1.46516	0.0283912	0.198961	1	2112
401	NUCLEOSOME ASSEMBLY%REACTOME%R-HSA-774815.1	30	0.410547	1.46405	0.0430769	0.19976	1	2112
402	POSITIVE REGULATION OF PROTEOLYSIS INVOLVED IN CELLULAR PROTEIN CATABOLIC PROCESS%GOBP%GO:1903052	40	0.383978	1.46241	0.0472973	0.201408	1	1864
403	POSITIVE REGULATION OF AXONOGENESIS%GOBP%GO:0050772	30	0.410575	1.46241	0.0584416	0.200924	1	790
404	NEGATIVE REGULATION OF PROTEIN MODIFICATION PROCESS%GOBP%GO:0031400	206	0.282828	1.46234	0	0.200488	1	1573
405	NONGENOTROPIC ANDROGEN SIGNALING%PATHWAY INTERACTION DATABASE NCI-NATURE CURATED DATA%NONGENOTROPIC ANDROGEN SIGNALING	25	0.436099	1.46164	0.0643275	0.200916	1	1412
406	CARDIAC SEPTUM DEVELOPMENT%GOBP%GO:0003279	22	0.443592	1.46152	0.0507042	0.200557	1	595
407	RIBONUCLEOPROTEIN COMPLEX EXPORT FROM NUCLEUS%GOBP%GO:0071426	91	0.318	1.46046	0.00909091	0.201406	1	2027
408	REGULATION OF CHROMATIN ORGANIZATION%GOBP%GO:1902275	77	0.330863	1.45986	0.0126582	0.201664	1	1764
409	EPIGENETIC REGULATION OF GENE EXPRESSION%REACTOME DATABASE ID RELEASE 75%212165	66	0.341638	1.45982	0.0167364	0.201223	1	1291
410	POSITIVE REGULATION OF VIRAL PROCESS%GOBP%GO:0048524	76	0.33824	1.45965	0.0127119	0.20096	1	1396
411	MITOTIC SISTER CHROMATID SEGREGATION%GOBP%GO:0000070	60	0.347915	1.45842	0.0181818	0.201999	1	1316
412	POSITIVE REGULATION OF CHROMOSOME SEGREGATION%GOBP%GO:0051984	17	0.467756	1.4581	0.0542857	0.20188	1	2060
413	COPII VESICLE COATING%GOBP%GO:0048208	46	0.369416	1.45782	0.0185185	0.201732	1	2454
414	PID_TCPTP_PATHWAY%MSIGDB_C2%PID_TCPTP_PATHWAY	33	0.39976	1.45701	0.0323625	0.202252	1	798
415	REGULATION OF TNFR1 SIGNALING%REACTOME%R-HSA-5357905.3	15	0.487249	1.45677	0.08	0.202064	1	1063
416	RESPONSE TO TYPE I INTERFERON%GOBP%GO:0034340	27	0.421206	1.45554	0.0450161	0.203168	1	1227
417	PID_GMCSF_PATHWAY%MSIGDB_C2%PID_GMCSF_PATHWAY	23	0.441713	1.45487	0.0462963	0.203519	1	604
418	POSITIVE REGULATION OF CHROMOSOME ORGANIZATION%GOBP%GO:2001252	81	0.33139	1.45433	0.00865801	0.203649	1	1817
419	PROTEIN CATABOLIC PROCESS%GOBP%GO:0030163	294	0.276951	1.45276	0	0.205102	1	1733
420	VESICLE TARGETING%GOBP%GO:0006903	59	0.350073	1.45273	0.0305344	0.204686	1	2454
421	TYPE I INTERFERON SIGNALING PATHWAY%GOBP%GO:0060337	24	0.42753	1.45271	0.0432099	0.204235	1	1227
422	REGULATION OF DNA-TEMPLATED TRANSCRIPTION, ELONGATION%GOBP%GO:0032784	27	0.420054	1.45269	0.0567823	0.203771	1	1916
423	CELLULAR RESPONSE TO HEAT STRESS%REACTOME%R-HSA-3371556.1	72	0.338521	1.45224	0.0294118	0.203812	1	1342
424	REGULATION OF CELLULAR RESPONSE TO HEAT%GOBP%GO:1900034	64	0.338961	1.45197	0.0337079	0.203659	1	1342
425	NUCLEAR-TRANSCRIBED MRNA CATABOLIC PROCESS, DEADENYLATION-DEPENDENT DECAY%GOBP%GO:0000288	37	0.38651	1.45187	0.0311526	0.203322	1	1948
426	SIGNALING BY TGF-BETA RECEPTOR COMPLEX%REACTOME DATABASE ID RELEASE 75%170834	36	0.401974	1.45083	0.0377359	0.204183	1	1536
427	TERMINATION OF RNA POLYMERASE II TRANSCRIPTION%GOBP%GO:0006369	21	0.442526	1.44427	0.0416667	0.212059	1	2344
428	POSITIVE REGULATION OF NEURON DIFFERENTIATION%GOBP%GO:0045666	92	0.318908	1.44118	0.0108108	0.215805	1	790
429	FORMATION OF THE BETA-CATENIN:TCF TRANSACTIVATING COMPLEX%REACTOME DATABASE ID RELEASE 75%201722	38	0.385225	1.43858	0.0375	0.218688	1	2112
430	RNA EXPORT FROM NUCLEUS%GOBP%GO:0006405	93	0.315593	1.43839	0.010929	0.218426	1	2027
431	NEGATIVE REGULATION OF CHROMATIN ORGANIZATION%GOBP%GO:1905268	25	0.424992	1.43833	0.0485175	0.21798	1	2635
432	IL4%NETPATH%IL4	44	0.364882	1.43823	0.0321543	0.217664	1	1003
433	POSITIVE REGULATION OF ESTABLISHMENT OF PROTEIN LOCALIZATION TO MITOCHONDRION%GOBP%GO:1903749	28	0.406578	1.43668	0.0382353	0.219229	1	1285
434	RAC1/PAK1/P38/MMP2 PATHWAY%WIKIPATHWAYS_20210210%WP3303%HOMO SAPIENS	46	0.366	1.43467	0.0352113	0.221422	1	2237
435	REGULATION OF PROTEIN UBIQUITINATION%GOBP%GO:0031396	84	0.32204	1.43313	0.0049505	0.223146	1	1617
436	POSITIVE REGULATION OF DNA REPAIR%GOBP%GO:0045739	27	0.415691	1.43289	0.058104	0.222981	1	1803
437	HEDGEHOG SIGNALING EVENTS MEDIATED BY GLI PROTEINS%PATHWAY INTERACTION DATABASE NCI-NATURE CURATED DATA%HEDGEHOG SIGNALING EVENTS MEDIATED BY GLI PROTEINS	32	0.399795	1.43237	0.0436242	0.223106	1	1419
438	IL-7%NETPATH%IL-7	20	0.457135	1.4322	0.0746667	0.22288	1	1376
439	PID_HEDGEHOG_GLI_PATHWAY%MSIGDB_C2%PID_HEDGEHOG_GLI_PATHWAY	32	0.399795	1.42833	0.0345912	0.227566	1	1419
440	CARDIAC SEPTUM MORPHOGENESIS%GOBP%GO:0060411	20	0.455943	1.42497	0.0755208	0.231708	1	595
441	COPII-COATED VESICLE BUDDING%GOBP%GO:0090114	51	0.352932	1.42467	0.020979	0.231572	1	2454
442	PHOSPHOINOSITIDES METABOLISM%WIKIPATHWAYS_20210210%WP4971%HOMO SAPIENS	26	0.421476	1.42419	0.0516304	0.231748	1	1529
443	REGULATION OF NEUROGENESIS%GOBP%GO:0050767	220	0.278743	1.42387	0	0.231629	1	790
444	SISTER CHROMATID SEGREGATION%GOBP%GO:0000819	69	0.331513	1.42355	0.0174673	0.231543	1	1225
445	POSITIVE REGULATION OF PROTEIN MODIFICATION BY SMALL PROTEIN CONJUGATION OR REMOVAL%GOBP%GO:1903322	55	0.347596	1.42333	0.0109091	0.231317	1	1617
446	NEURODEGENERATION WITH BRAIN IRON ACCUMULATION (NBIA) SUBTYPES PATHWAY%WIKIPATHWAYS_20210210%WP4577%HOMO SAPIENS	22	0.435513	1.42242	0.0776397	0.231964	1	1894
447	REGULATION OF CILIUM ASSEMBLY%GOBP%GO:1902017	22	0.434848	1.42161	0.0722543	0.232555	1	1641
448	NEGATIVE REGULATION OF MET ACTIVITY%REACTOME%R-HSA-6807004.1	19	0.452946	1.42149	0.0651558	0.232268	1	1669
449	CELLULAR RESPONSE TO TYPE I INTERFERON%GOBP%GO:0071357	24	0.42753	1.42002	0.08	0.233733	1	1227
450	PROTEIN UBIQUITINATION%REACTOME DATABASE ID RELEASE 75%8852135	52	0.351518	1.41962	0.0283401	0.233741	1	1507
451	5HT1 TYPE RECEPTOR MEDIATED SIGNALING PATHWAY%PANTHER PATHWAY%P04373	23	0.423401	1.41944	0.0651558	0.233445	1	1338
452	POSITIVE REGULATION OF UBIQUITIN-DEPENDENT PROTEIN CATABOLIC PROCESS%GOBP%GO:2000060	35	0.383535	1.41888	0.0430769	0.233736	1	1650
453	INTERFERON SIGNALING%REACTOME%R-HSA-913531.2	107	0.311272	1.4187	0.0206186	0.233411	1	1356
454	POSITIVE REGULATION OF ANION TRANSPORT%GOBP%GO:1903793	20	0.439638	1.41847	0.0747126	0.233217	1	2123
455	BIOCARTA_IL2RB_PATHWAY%MSIGDB_C2%BIOCARTA_IL2RB_PATHWAY	21	0.437619	1.41589	0.0778098	0.236261	1	604
456	POSITIVE REGULATION OF LAMELLIPODIUM ASSEMBLY%GOBP%GO:0010592	18	0.460248	1.4156	0.0721649	0.236123	1	113
457	NUCLEAR ENVELOPE (NE) REASSEMBLY%REACTOME DATABASE ID RELEASE 75%2995410	60	0.338049	1.41523	0.036036	0.236106	1	1364
458	GMCSF-MEDIATED SIGNALING EVENTS%PATHWAY INTERACTION DATABASE NCI-NATURE CURATED DATA%GMCSF-MEDIATED SIGNALING EVENTS	24	0.428747	1.41502	0.0744986	0.235848	1	604
459	POSITIVE REGULATION OF NEURON PROJECTION DEVELOPMENT%GOBP%GO:0010976	81	0.316836	1.41487	0.0183486	0.235548	1	790
460	PEPTIDYL-SERINE PHOSPHORYLATION%GOBP%GO:0018105	71	0.329751	1.41404	0.0217391	0.236356	1	1033
461	TIE1 TEK%IOB%TIE1 TEK	16	0.485383	1.41385	0.0666667	0.236142	1	1034
462	SUMOYLATION OF RNA BINDING PROTEINS%REACTOME DATABASE ID RELEASE 75%4570464	32	0.387597	1.41357	0.0398773	0.236035	1	1112
463	NEGATIVE REGULATION OF ENDOCYTOSIS%GOBP%GO:0045806	36	0.377677	1.41227	0.0398671	0.237368	1	709
464	PROTEIN MODIFICATION BY SMALL PROTEIN CONJUGATION OR REMOVAL%GOBP%GO:0070647	320	0.263693	1.41036	0	0.239512	1	1571
465	REGULATION OF RHOA ACTIVITY%PATHWAY INTERACTION DATABASE NCI-NATURE CURATED DATA%REGULATION OF RHOA ACTIVITY	22	0.432176	1.40866	0.059322	0.241516	1	1121
466	POSITIVE REGULATION OF PROTEASOMAL UBIQUITIN-DEPENDENT PROTEIN CATABOLIC PROCESS%GOBP%GO:0032436	32	0.405981	1.40835	0.070122	0.241369	1	368
467	TGF_BETA_RECEPTOR%IOB%TGF_BETA_RECEPTOR	100	0.308936	1.40673	0.00947867	0.243139	1	1817
468	MRNA METABOLIC PROCESS%GOBP%GO:0016071	410	0.259673	1.40541	0	0.244591	1	2315
469	REGULATION OF VIRAL PROCESS%GOBP%GO:0050792	121	0.297292	1.40402	0.0268817	0.246096	1	1567
470	MRNA DECAY BY 3' TO 5' EXORIBONUCLEASE%REACTOME%R-HSA-429958.2	16	0.472272	1.40366	0.0727763	0.246128	1	2285
471	MODULATION BY VIRUS OF HOST MORPHOLOGY OR PHYSIOLOGY%GOBP%GO:0019048	17	0.462405	1.40138	0.0983146	0.248916	1	957
472	5HT2 TYPE RECEPTOR MEDIATED SIGNALING PATHWAY%PANTHER PATHWAY%P04374	25	0.410248	1.39916	0.0755814	0.251706	1	1529
473	TGF_BETA_RECEPTOR%NETPATH%TGF_BETA_RECEPTOR	116	0.287667	1.39834	0.03125	0.252465	1	1817
474	SIGNALING EVENTS MEDIATED BY TCPTP%PATHWAY INTERACTION DATABASE NCI-NATURE CURATED DATA%SIGNALING EVENTS MEDIATED BY TCPTP	34	0.386751	1.39822	0.052459	0.252112	1	999
475	SEALING OF THE NUCLEAR ENVELOPE (NE) BY ESCRT-III%REACTOME%R-HSA-9668328.1	27	0.419748	1.39629	0.0579268	0.254455	1	1255
476	POSITIVE REGULATION OF MRNA METABOLIC PROCESS%GOBP%GO:1903313	46	0.359149	1.39594	0.0501672	0.254446	1	1485
477	G2 M DNA DAMAGE CHECKPOINT%REACTOME DATABASE ID RELEASE 75%69473	49	0.346652	1.39528	0.0309278	0.254871	1	1342
478	ERBB2 ERBB3 SIGNALING EVENTS%PATHWAY INTERACTION DATABASE NCI-NATURE CURATED DATA%ERBB2 ERBB3 SIGNALING EVENTS	26	0.410785	1.39467	0.0549451	0.255198	1	2500
479	CHROMATIN ASSEMBLY%GOBP%GO:0031497	58	0.346214	1.39401	0.0458015	0.255709	1	1808
480	PID_RHOA_REG_PATHWAY%MSIGDB_C2%PID_RHOA_REG_PATHWAY	22	0.432176	1.39359	0.0869565	0.25575	1	1121
481	REGULATION OF INTRACELLULAR ESTROGEN RECEPTOR SIGNALING PATHWAY%GOBP%GO:0033146	17	0.460463	1.39225	0.0927835	0.257141	1	1303
482	MEMBRANE DOCKING%GOBP%GO:0022406	84	0.312661	1.39115	0.0171674	0.258301	1	1846
483	RANKL/RANK (RECEPTOR ACTIVATOR OF NFKB (LIGAND)) SIGNALING PATHWAY%WIKIPATHWAYS_20210210%WP2018%HOMO SAPIENS	34	0.379247	1.39085	0.0451613	0.258186	1	1034
484	POSITIVE REGULATION OF GTPASE ACTIVITY%GOBP%GO:0043547	85	0.307274	1.39051	0.00934579	0.258173	1	683
485	NORC NEGATIVELY REGULATES RRNA EXPRESSION%REACTOME DATABASE ID RELEASE 75%427413	47	0.345542	1.38978	0.0436364	0.258778	1	1204
486	REGULATION OF CHROMOSOME ORGANIZATION%GOBP%GO:0033044	148	0.282531	1.38977	0.01875	0.258249	1	1835
487	NUCLEAR TRANSPORT%GOBP%GO:0051169	151	0.28575	1.38974	0	0.257752	1	1463
488	TRANSLATION FACTORS%WIKIPATHWAYS_20210210%WP107%HOMO SAPIENS	44	0.360011	1.38953	0.0380623	0.257456	1	2383
489	PROTEIN LOCALIZATION TO CELL PERIPHERY%GOBP%GO:1990778	106	0.300933	1.38886	0.0163934	0.258018	1	2006
490	CELLULAR RESPONSE TO EXTERNAL STIMULUS%GOBP%GO:0071496	102	0.302247	1.38811	0.0138249	0.258562	1	1620
491	PROLACTIN SIGNALING PATHWAY%WIKIPATHWAYS_20210210%WP2037%HOMO SAPIENS	49	0.340713	1.38706	0.0361446	0.259611	1	2187
492	POSITIVE REGULATION OF CELL GROWTH%GOBP%GO:0030307	64	0.329681	1.38614	0.0368852	0.260533	1	1826
493	PROTEIN MODIFICATION BY SMALL PROTEIN CONJUGATION%GOBP%GO:0032446	254	0.262126	1.3857	0	0.26064	1	1711
494	PID_ANGIOPOIETIN_RECEPTOR_PATHWAY%MSIGDB_C2%PID_ANGIOPOIETIN_RECEPTOR_PATHWAY	33	0.37426	1.38533	0.0649351	0.260733	1	2187
495	PID_ERBB2_ERBB3_PATHWAY%MSIGDB_C2%PID_ERBB2_ERBB3_PATHWAY	26	0.410785	1.38485	0.0736196	0.261009	1	2500
496	AUTOPHAGY%REACTOME%R-HSA-9612973.2	78	0.319786	1.38484	0.0264317	0.260492	1	980
497	POSITIVE REGULATION OF PROTEIN UBIQUITINATION%GOBP%GO:0031398	48	0.348667	1.38466	0.0298507	0.260274	1	1617
498	BIOCARTA_ECM_PATHWAY%MSIGDB_C2%BIOCARTA_ECM_PATHWAY	17	0.446865	1.38378	0.0911528	0.261223	1	96
499	CELLULAR SENESCENCE%REACTOME%R-HSA-2559583.4	91	0.305296	1.38377	0.0239234	0.260716	1	1817
500	TRANSPORT OF INORGANIC CATIONS ANIONS AND AMINO ACIDS OLIGOPEPTIDES%REACTOME DATABASE ID RELEASE 75%425393	46	0.350451	1.38306	0.0526316	0.261293	1	1415
501	DEUBIQUITINATION%REACTOME DATABASE ID RELEASE 75%5688426	145	0.283812	1.38263	0	0.261449	1	1302
502	NUCLEOBASE-CONTAINING COMPOUND TRANSPORT%GOBP%GO:0015931	112	0.296598	1.3825	0.0315789	0.261182	1	2027
503	AMYLOID FIBER FORMATION%REACTOME%R-HSA-977225.6	54	0.332504	1.38232	0.0290909	0.260933	1	2306
504	SIGNALLING TO ERKS%REACTOME DATABASE ID RELEASE 75%187687	19	0.436545	1.38119	0.0996885	0.262057	1	1034
505	GOLGI TO PLASMA MEMBRANE PROTEIN TRANSPORT%GOBP%GO:0043001	21	0.417682	1.37941	0.0733138	0.264114	1	1862
506	VEGFR3 SIGNALING IN LYMPHATIC ENDOTHELIUM%PATHWAY INTERACTION DATABASE NCI-NATURE CURATED DATA%VEGFR3 SIGNALING IN LYMPHATIC ENDOTHELIUM	22	0.428697	1.37914	0.0852941	0.263953	1	898
507	CHROMOSOME ORGANIZATION%GOBP%GO:0051276	374	0.256795	1.37808	0	0.265026	1	1445
508	PID_SMAD2_3NUCLEAR_PATHWAY%MSIGDB_C2%PID_SMAD2_3NUCLEAR_PATHWAY	23	0.425014	1.37787	0.0771513	0.264865	1	1764
509	NUCLEAR EXPORT%GOBP%GO:0051168	107	0.295693	1.37678	0.0150754	0.265885	1	2027
510	PROCESSING OF DNA DOUBLE-STRAND BREAK ENDS%REACTOME%R-HSA-5693607.1	47	0.34963	1.37671	0.0442804	0.265504	1	1125
511	CELLULAR COMPONENT MAINTENANCE%GOBP%GO:0043954	24	0.405983	1.37573	0.0591716	0.266467	1	749
512	POSITIVE REGULATION OF NEUROGENESIS%GOBP%GO:0050769	115	0.294132	1.37517	0.0212766	0.266758	1	596
513	TGF-BETA RECEPTOR SIGNALING%PATHWAY INTERACTION DATABASE NCI-NATURE CURATED DATA%TGF-BETA RECEPTOR SIGNALING	33	0.379806	1.37397	0.0605096	0.268024	1	578
514	TGF-BETA RECEPTOR SIGNALING ACTIVATES SMADS%REACTOME DATABASE ID RELEASE 75%2173789	22	0.43271	1.37389	0.0778098	0.267629	1	1278
515	REGULATION OF NUCLEAR SMAD2 3 SIGNALING%PATHWAY INTERACTION DATABASE NCI-NATURE CURATED DATA%REGULATION OF NUCLEAR SMAD2 3 SIGNALING	22	0.425824	1.37377	0.0788732	0.267311	1	1764
516	IGF1 PATHWAY%PATHWAY INTERACTION DATABASE NCI-NATURE CURATED DATA%IGF1 PATHWAY	24	0.413749	1.37369	0.0879765	0.266887	1	705
517	INSULIN RECEPTOR SIGNALLING CASCADE%REACTOME DATABASE ID RELEASE 75%74751	16	0.462164	1.37206	0.0989583	0.268908	1	369
518	NEGATIVE REGULATION OF MAP KINASE ACTIVITY%GOBP%GO:0043407	27	0.394341	1.37174	0.0606061	0.268843	1	1169
519	POSITIVE REGULATION OF CELL MORPHOGENESIS INVOLVED IN DIFFERENTIATION%GOBP%GO:0010770	66	0.324666	1.37141	0.0275591	0.268795	1	790
520	SIGNALING BY ERBB2%REACTOME%R-HSA-1227986.7	32	0.377224	1.37061	0.0679012	0.269592	1	276
521	PANCREATIC ADENOCARCINOMA PATHWAY%WIKIPATHWAYS_20210210%WP4263%HOMO SAPIENS	52	0.343518	1.3694	0.0433213	0.271025	1	1034
522	OUTFLOW TRACT MORPHOGENESIS%GOBP%GO:0003151	23	0.413547	1.36928	0.0702703	0.270723	1	1086
523	REGULATION OF ESTABLISHMENT OF PROTEIN LOCALIZATION TO MITOCHONDRION%GOBP%GO:1903747	31	0.382994	1.36871	0.0582822	0.271108	1	1285
524	BDNF%IOB%BDNF	20	0.429827	1.36839	0.082153	0.271039	1	1552
525	BIOCARTA_TPO_PATHWAY%MSIGDB_C2%BIOCARTA_TPO_PATHWAY	18	0.443495	1.36676	0.0944444	0.273048	1	1034
526	GDNF%IOB%GDNF	23	0.399868	1.36661	0.0784314	0.272804	1	1034
527	SENSORY PERCEPTION OF SOUND%GOBP%GO:0007605	38	0.363308	1.36582	0.0646154	0.273558	1	1271
528	MIRNA TARGETS IN ECM AND MEMBRANE RECEPTORS%WIKIPATHWAYS_20210210%WP2911%HOMO SAPIENS	22	0.41288	1.36507	0.109467	0.274274	1	1248
529	PID_LYMPH_ANGIOGENESIS_PATHWAY%MSIGDB_C2%PID_LYMPH_ANGIOGENESIS_PATHWAY	22	0.428697	1.36478	0.103064	0.274238	1	898
530	NEGATIVE REGULATORS OF RIG-I MDA5 SIGNALING%REACTOME%R-HSA-936440.4	19	0.431852	1.36433	0.0837989	0.274498	1	1215
531	POST-GOLGI VESICLE-MEDIATED TRANSPORT%GOBP%GO:0006892	99	0.3068	1.36334	0.0239234	0.275599	1	1684
532	CHROMATIN ORGANIZATION%GOBP%GO:0006325	216	0.26352	1.36246	0	0.276586	1	1485
533	PROTEIN FOLDING%REACTOME%R-HSA-391251.1	69	0.316596	1.36215	0.044	0.276582	1	691
534	PID_MET_PATHWAY%MSIGDB_C2%PID_MET_PATHWAY	59	0.329096	1.36132	0.0520446	0.277467	1	1034
535	NETRIN-MEDIATED SIGNALING EVENTS%PATHWAY INTERACTION DATABASE NCI-NATURE CURATED DATA%NETRIN-MEDIATED SIGNALING EVENTS	27	0.390949	1.3599	0.0589971	0.279301	1	1240
536	G-PROTEIN ACTIVATION%REACTOME DATABASE ID RELEASE 75%202040	16	0.44003	1.35971	0.0997151	0.279097	1	438
537	HYPOTHESIZED PATHWAYS IN PATHOGENESIS OF CARDIOVASCULAR DISEASE%WIKIPATHWAYS_20210210%WP3668%HOMO SAPIENS	18	0.444394	1.35957	0.108824	0.278799	1	1764
538	REGULATION OF PROTEIN LOCALIZATION%GOBP%GO:0032880	356	0.252464	1.35931	0	0.27869	1	1419
539	INTERACTIONS OF VPR WITH HOST CELLULAR PROTEINS%REACTOME DATABASE ID RELEASE 75%176033	30	0.384967	1.35907	0.0672515	0.278517	1	1205
540	NEGATIVE EPIGENETIC REGULATION OF RRNA EXPRESSION%REACTOME DATABASE ID RELEASE 75%5250941	48	0.340315	1.35855	0.0683453	0.278745	1	1204
541	VESICLE BUDDING FROM MEMBRANE%GOBP%GO:0006900	77	0.310892	1.35849	0.040724	0.278313	1	2454
542	FACTORS INVOLVED IN MEGAKARYOCYTE DEVELOPMENT AND PLATELET PRODUCTION%REACTOME%R-HSA-983231.2	66	0.321052	1.35804	0.0401606	0.278593	1	1849
543	NEGATIVE REGULATION OF RNA CATABOLIC PROCESS%GOBP%GO:1902369	29	0.391262	1.35518	0.084375	0.282915	1	2311
544	NEGATIVE REGULATION OF LEUKOCYTE MIGRATION%GOBP%GO:0002686	16	0.451545	1.35476	0.11054	0.282999	1	2548
545	NEGATIVE REGULATION OF TRANSMEMBRANE RECEPTOR PROTEIN SERINE/THREONINE KINASE SIGNALING PATHWAY%GOBP%GO:0090101	55	0.332737	1.35443	0.0526316	0.283067	1	1043
546	PID_INTEGRIN1_PATHWAY%MSIGDB_C2%PID_INTEGRIN1_PATHWAY	62	0.320988	1.35269	0.040146	0.285287	1	1326
547	HALLMARK_MYC_TARGETS_V2%MSIGDB_C2%HALLMARK_MYC_TARGETS_V2	47	0.344247	1.35113	0.0613718	0.287318	1	1632
548	VESICLE TARGETING, TO, FROM OR WITHIN GOLGI%GOBP%GO:0048199	50	0.337474	1.35094	0.0414938	0.28711	1	2598
549	PID_NETRIN_PATHWAY%MSIGDB_C2%PID_NETRIN_PATHWAY	27	0.390949	1.35022	0.0766871	0.28777	1	1240
550	CEREBRAL CORTEX DEVELOPMENT%GOBP%GO:0021987	24	0.40332	1.34987	0.0821114	0.28778	1	1917
551	TNFALPHA%IOB%TNFALPHA	143	0.276844	1.34981	0.0130719	0.287377	1	1352
552	SYNTHESIS OF PIPS AT THE PLASMA MEMBRANE%REACTOME%R-HSA-1660499.6	26	0.394713	1.34962	0.133929	0.287135	1	914
553	RIBOSOME BIOGENESIS%GOBP%GO:0042254	189	0.268194	1.34749	0.00746269	0.290181	1	1472
554	POSITIVE REGULATION OF MITOCHONDRIAL OUTER MEMBRANE PERMEABILIZATION INVOLVED IN APOPTOTIC SIGNALING PATHWAY%GOBP%GO:1901030	17	0.442324	1.34739	0.101928	0.289822	1	1291
555	MITOTIC CELL CYCLE PROCESS%GOBP%GO:1903047	299	0.256306	1.34728	0	0.28948	1	1364
556	PRC2 METHYLATES HISTONES AND DNA%REACTOME DATABASE ID RELEASE 75%212300	30	0.382975	1.34722	0.0792683	0.289033	1	2263
557	REGULATION OF I-KAPPAB KINASE/NF-KAPPAB SIGNALING%GOBP%GO:0043122	91	0.300816	1.34689	0.0327103	0.289083	1	687
558	NEGATIVE REGULATION OF PROTEIN DEPHOSPHORYLATION%GOBP%GO:0035308	15	0.464152	1.34596	0.10929	0.290162	1	1776
559	POSITIVE REGULATION OF I-KAPPAB KINASE/NF-KAPPAB SIGNALING%GOBP%GO:0043123	75	0.30836	1.34576	0.0213675	0.289927	1	603
560	CARBOHYDRATE TRANSPORT%GOBP%GO:0008643	16	0.447624	1.34575	0.108696	0.289427	1	2265
561	METHIONINE DE NOVO AND SALVAGE PATHWAY%WIKIPATHWAYS_20210210%WP3580%HOMO SAPIENS	15	0.463147	1.34306	0.121212	0.293446	1	2292
562	SLC TRANSPORTER DISORDERS%REACTOME%R-HSA-5619102.6	52	0.327163	1.34253	0.0431655	0.293866	1	1350
563	REGULATION OF SYMBIOSIS, ENCOMPASSING MUTUALISM THROUGH PARASITISM%GOBP%GO:0043903	130	0.284582	1.34248	0.0116279	0.293428	1	2120
564	FGF SIGNALING PATHWAY%PATHWAY INTERACTION DATABASE NCI-NATURE CURATED DATA%FGF SIGNALING PATHWAY	31	0.370241	1.34216	0.0825688	0.293418	1	991
565	NEGATIVE REGULATION OF CELLULAR COMPONENT ORGANIZATION%GOBP%GO:0051129	318	0.248374	1.34202	0	0.293129	1	1441
566	EXECUTION PHASE OF APOPTOSIS%GOBP%GO:0097194	22	0.412986	1.34136	0.114706	0.293711	1	1315
567	REGULATION OF AXONOGENESIS%GOBP%GO:0050770	69	0.312874	1.34085	0.042471	0.294067	1	790
568	SIGNALING BY INSULIN RECEPTOR%REACTOME DATABASE ID RELEASE 75%74752	34	0.358029	1.34083	0.097561	0.293592	1	2496
569	POSITIVE REGULATION OF CELLULAR PROTEIN CATABOLIC PROCESS%GOBP%GO:1903364	54	0.331982	1.34067	0.0864198	0.293341	1	1650
570	BCR%NETPATH%BCR	90	0.294323	1.34063	0.046729	0.292883	1	1333
571	SUMOYLATION OF CHROMATIN ORGANIZATION PROTEINS%REACTOME DATABASE ID RELEASE 75%4551638	35	0.366163	1.34029	0.0865052	0.292898	1	1204
572	PROTEIN EXPORT FROM NUCLEUS%GOBP%GO:0006611	104	0.289287	1.33911	0.0309278	0.294412	1	2027
573	POSITIVE REGULATION OF TOR SIGNALING%GOBP%GO:0032008	20	0.414179	1.33823	0.13913	0.295362	1	500
574	NEGATIVE REGULATION OF VIRAL LIFE CYCLE%GOBP%GO:1903901	36	0.364314	1.33778	0.0592105	0.295601	1	1790
575	METALLOPROTEASE DUBS%REACTOME DATABASE ID RELEASE 75%5689901	21	0.41753	1.33695	0.111717	0.29651	1	1718
576	IFN-GAMMA%IOB%IFN-GAMMA	24	0.396869	1.33566	0.109422	0.298268	1	2184
577	NEGATIVE REGULATION OF MAPK CASCADE%GOBP%GO:0043409	56	0.328737	1.33499	0.0397112	0.298923	1	820
578	ANGIOPOIETIN RECEPTOR TIE2-MEDIATED SIGNALING%PATHWAY INTERACTION DATABASE NCI-NATURE CURATED DATA%ANGIOPOIETIN RECEPTOR TIE2-MEDIATED SIGNALING	33	0.37426	1.3348	0.0873786	0.298751	1	2187
579	NUCLEOSOME ASSEMBLY%GOBP%GO:0006334	40	0.352598	1.33468	0.0863787	0.298438	1	1134
580	NEGATIVE REGULATION OF CELL CYCLE G2/M PHASE TRANSITION%GOBP%GO:1902750	65	0.312881	1.33296	0.0323887	0.300846	1	2062
581	IL2-MEDIATED SIGNALING EVENTS%PATHWAY INTERACTION DATABASE NCI-NATURE CURATED DATA%IL2-MEDIATED SIGNALING EVENTS	33	0.365144	1.33289	0.0843373	0.300441	1	1376
582	NUCLEOCYTOPLASMIC TRANSPORT%GOBP%GO:0006913	148	0.274999	1.3327	0.0144928	0.300231	1	1463
583	VESICLE COATING%GOBP%GO:0006901	50	0.337474	1.33129	0.0474453	0.302073	1	2598
584	GOLGI ORGANIZATION%GOBP%GO:0007030	69	0.311191	1.33102	0.0291667	0.301978	1	1622
585	PDGF SIGNALING PATHWAY%PANTHER PATHWAY%P00047	58	0.32188	1.33038	0.0769231	0.302593	1	1121
586	MUSCARINIC ACETYLCHOLINE RECEPTOR 2 AND 4 SIGNALING PATHWAY%PANTHER PATHWAY%P00043	28	0.380258	1.33025	0.116923	0.302254	1	678
587	MRNA SPLICE SITE SELECTION%GOBP%GO:0006376	22	0.406098	1.33013	0.110497	0.301977	1	1974
588	DNA CONFORMATION CHANGE%GOBP%GO:0071103	115	0.287278	1.33011	0.0124224	0.301488	1	1134
589	REGULATION OF CELLULAR PROTEIN LOCALIZATION%GOBP%GO:1903827	255	0.253261	1.32999	0	0.301157	1	1291
590	STRESS-ACTIVATED PROTEIN KINASE SIGNALING CASCADE%GOBP%GO:0031098	45	0.348085	1.32919	0.0804196	0.302073	1	1033
591	BIOCARTA_RACCYCD_PATHWAY%MSIGDB_C2%BIOCARTA_RACCYCD_PATHWAY	16	0.442151	1.32825	0.117318	0.303264	1	434
592	BETA1 INTEGRIN CELL SURFACE INTERACTIONS%PATHWAY INTERACTION DATABASE NCI-NATURE CURATED DATA%BETA1 INTEGRIN CELL SURFACE INTERACTIONS	62	0.320988	1.32823	0.0627306	0.302783	1	1326
593	BIOCARTA_IGF1MTOR_PATHWAY%MSIGDB_C2%BIOCARTA_IGF1MTOR_PATHWAY	15	0.453053	1.32612	0.144444	0.305746	1	588
594	REGULATION OF NUCLEOCYTOPLASMIC TRANSPORT%GOBP%GO:0046822	47	0.336121	1.32482	0.0592334	0.307538	1	1408
595	SIGNALING EVENTS MEDIATED BY HEPATOCYTE GROWTH FACTOR RECEPTOR (C-MET)%PATHWAY INTERACTION DATABASE NCI-NATURE CURATED DATA%SIGNALING EVENTS MEDIATED BY HEPATOCYTE GROWTH FACTOR RECEPTOR (C-MET)	60	0.323994	1.32439	0.0823529	0.307853	1	1034
596	RAB GERANYLGERANYLATION%REACTOME%R-HSA-8873719.2	50	0.336943	1.32418	0.059761	0.307707	1	2360
597	POSITIVE REGULATION OF CELLULAR PROTEIN LOCALIZATION%GOBP%GO:1903829	170	0.265343	1.32403	0.015748	0.307392	1	1291
598	ERROR-FREE TRANSLESION SYNTHESIS%GOBP%GO:0070987	17	0.441811	1.32388	0.129834	0.307162	1	1785
599	UCH PROTEINASES%REACTOME DATABASE ID RELEASE 75%5689603	73	0.308901	1.32387	0.0299145	0.306676	1	2160
600	REGULATION OF MACROAUTOPHAGY%GOBP%GO:0016241	96	0.290416	1.32309	0.0434783	0.307391	1	1060
601	REGULATION OF CELL JUNCTION ASSEMBLY%GOBP%GO:1901888	59	0.316693	1.3201	0.0647773	0.312018	1	1247
602	DEATH RECEPTOR SIGNALLING%REACTOME%R-HSA-73887.4	58	0.319397	1.31965	0.0458015	0.312258	1	1333
603	RESOLUTION OF ABASIC SITES (AP SITES)%REACTOME%R-HSA-73933.2	21	0.404597	1.31958	0.127976	0.311871	1	1803
604	DAP12 SIGNALING%REACTOME DATABASE ID RELEASE 75%2424491	18	0.43642	1.31917	0.126844	0.312044	1	272
605	SYNDECAN-2-MEDIATED SIGNALING EVENTS%PATHWAY INTERACTION DATABASE NCI-NATURE CURATED DATA%SYNDECAN-2-MEDIATED SIGNALING EVENTS	28	0.37881	1.31863	0.0922619	0.31248	1	2184
606	REGULATION OF RAC1 ACTIVITY%PATHWAY INTERACTION DATABASE NCI-NATURE CURATED DATA%REGULATION OF RAC1 ACTIVITY	23	0.395657	1.31815	0.11396	0.312711	1	1217
607	CELLULAR RESPONSE TO EXTRACELLULAR STIMULUS%GOBP%GO:0031668	87	0.293975	1.31781	0.0368664	0.312797	1	1620
608	UNTITLED%PANTHER PATHWAY%P05916	19	0.420331	1.3173	0.101124	0.313125	1	1569
609	VIRAL PROCESS%GOBP%GO:0016032	296	0.248765	1.31593	0	0.315125	1	826
610	POSITIVE REGULATION OF ANIMAL ORGAN MORPHOGENESIS%GOBP%GO:0110110	20	0.419776	1.31459	0.0919881	0.316958	1	1000
611	HALLMARK_APICAL_JUNCTION%MSIGDB_C2%HALLMARK_APICAL_JUNCTION	139	0.27679	1.31304	0.0359712	0.319159	1	606
612	M PHASE%REACTOME%R-HSA-68886.3	255	0.253862	1.31266	0	0.319294	1	2070
613	RECYCLING PATHWAY OF L1%REACTOME DATABASE ID RELEASE 75%437239	22	0.385368	1.31251	0.121127	0.319014	1	582
614	OPIOID PROOPIOMELANOCORTIN PATHWAY%PANTHER PATHWAY%P05917	19	0.420331	1.31175	0.119534	0.319887	1	1569
615	RESPONSE TO CARBOHYDRATE%GOBP%GO:0009743	29	0.370489	1.31138	0.112179	0.319991	1	1376
616	AGGREPHAGY%GOBP%GO:0035973	20	0.41314	1.31089	0.119658	0.320279	1	2279
617	ENERGY DEPENDENT REGULATION OF MTOR BY LKB1-AMPK%REACTOME%R-HSA-380972.1	17	0.434797	1.31069	0.13089	0.320117	1	1998
618	ARTERY MORPHOGENESIS%GOBP%GO:0048844	17	0.445231	1.30974	0.137363	0.321264	1	595
619	STRUCTURAL PATHWAY OF INTERLEUKIN 1 (IL-1)%WIKIPATHWAYS_20210210%WP2637%HOMO SAPIENS	21	0.407272	1.30905	0.127329	0.322013	1	2254
620	CELLULAR RESPONSE TO AMINO ACID STARVATION%GOBP%GO:0034198	37	0.346364	1.30832	0.0869565	0.322735	1	711
621	INTRA-GOLGI TRAFFIC%REACTOME%R-HSA-6811438.1	30	0.371809	1.30472	0.114754	0.328769	1	1766
622	BIOCARTA_PTDINS_PATHWAY%MSIGDB_C2%BIOCARTA_PTDINS_PATHWAY	22	0.394747	1.30287	0.126437	0.331515	1	1291
623	MODIFICATION BY SYMBIONT OF HOST MORPHOLOGY OR PHYSIOLOGY%GOBP%GO:0044003	33	0.364948	1.30277	0.10356	0.331156	1	957
624	POSITIVE REGULATION OF CELLULAR COMPONENT BIOGENESIS%GOBP%GO:0044089	256	0.24384	1.30253	0	0.331074	1	1724
625	PIGMENTATION%GOBP%GO:0043473	32	0.367343	1.30246	0.0942857	0.330666	1	1156
626	CELLULAR MACROMOLECULE CATABOLIC PROCESS%GOBP%GO:0044265	461	0.236197	1.30216	0	0.330684	1	1817
627	ACTIN POLYMERIZATION OR DEPOLYMERIZATION%GOBP%GO:0008154	29	0.366406	1.30202	0.105096	0.33041	1	1715
628	PID_VEGFR1_PATHWAY%MSIGDB_C2%PID_VEGFR1_PATHWAY	20	0.402186	1.30185	0.118497	0.330234	1	991
629	CELLULAR PIGMENTATION%GOBP%GO:0033059	26	0.373857	1.30174	0.109827	0.329912	1	1156
630	GOLGI VESICLE BUDDING%GOBP%GO:0048194	58	0.318167	1.301	0.0871369	0.330718	1	2454
631	CARDIAC CELL DEVELOPMENT%GOBP%GO:0055006	16	0.432295	1.30078	0.12973	0.330561	1	716
632	REGULATION OF MITOCHONDRIAL OUTER MEMBRANE PERMEABILIZATION INVOLVED IN APOPTOTIC SIGNALING PATHWAY%GOBP%GO:1901028	21	0.404502	1.30014	0.115281	0.3312	1	1291
633	REGULATION OF LOCOMOTION%GOBP%GO:0040012	458	0.235518	1.29755	0.0277778	0.335365	1	1280
634	IL-5 SIGNALING PATHWAY%WIKIPATHWAYS_20210210%WP127%HOMO SAPIENS	26	0.37302	1.29694	0.127726	0.33596	1	1291
635	CELLULAR RESPONSE TO NUTRIENT LEVELS%GOBP%GO:0031669	80	0.296876	1.29654	0.0476191	0.336129	1	1620
636	POSITIVE REGULATION OF BINDING%GOBP%GO:0051099	65	0.309666	1.29654	0.0676692	0.335608	1	1605
637	CELL CYCLE PROCESS%GOBP%GO:0022402	418	0.237376	1.29603	0	0.336018	1	1606
638	NEGATIVE REGULATION OF RNA SPLICING%GOBP%GO:0033119	16	0.430555	1.29599	0.147368	0.335548	1	1062
639	PID_DELTA_NP63_PATHWAY%MSIGDB_C2%PID_DELTA_NP63_PATHWAY	25	0.375889	1.29539	0.116208	0.336192	1	1291
640	SIGNALING BY EGFR IN CANCER%REACTOME DATABASE ID RELEASE 75%1643713	15	0.44534	1.294	0.136364	0.338259	1	188
641	CELLULAR GLUCOSE HOMEOSTASIS%GOBP%GO:0001678	19	0.409169	1.29342	0.123894	0.338701	1	1150
642	CHROMATIN ORGANIZATION%REACTOME DATABASE ID RELEASE 75%4839726	106	0.282721	1.29341	0.028436	0.338183	1	1204
643	RHO GTPASES ACTIVATE PKNS%REACTOME%R-HSA-5625740.1	53	0.318645	1.29263	0.0732601	0.339056	1	1718
644	NEGATIVE REGULATION OF PROTEIN SERINE/THREONINE KINASE ACTIVITY%GOBP%GO:0071901	40	0.340636	1.29254	0.105263	0.3387	1	2141
645	HUMAN THYROID STIMULATING HORMONE (TSH) SIGNALING PATHWAY%WIKIPATHWAYS_20210210%WP2032%HOMO SAPIENS	41	0.341073	1.29165	0.122977	0.339883	1	449
646	REGULATION OF NERVOUS SYSTEM DEVELOPMENT%GOBP%GO:0051960	248	0.245687	1.29125	0.0147059	0.34006	1	725
647	REGULATION OF ADHERENS JUNCTION ORGANIZATION%GOBP%GO:1903391	46	0.323109	1.28994	0.0772059	0.341871	1	1037
648	POSITIVE REGULATION OF CANONICAL WNT SIGNALING PATHWAY%GOBP%GO:0090263	85	0.290454	1.28969	0.0456853	0.341852	1	1778
649	REGULATION OF CELLULAR LOCALIZATION%GOBP%GO:0060341	372	0.242431	1.28955	0	0.341578	1	1300
650	PROTEIN LOCALIZATION TO PLASMA MEMBRANE%GOBP%GO:0072659	95	0.286376	1.28934	0.0539216	0.341439	1	2093
651	NEGATIVE REGULATION OF PROTEIN PHOSPHORYLATION%GOBP%GO:0001933	139	0.26614	1.28907	0.0294118	0.341406	1	1566
652	REGULATION OF WNT SIGNALING PATHWAY%GOBP%GO:0030111	157	0.263373	1.28853	0.0215827	0.341926	1	1800
653	REGULATION OF ANDROGEN RECEPTOR SIGNALING PATHWAY%GOBP%GO:0060765	17	0.415966	1.28802	0.135897	0.342365	1	1821
654	INTERFERON ALPHA BETA SIGNALING%REACTOME DATABASE ID RELEASE 75%909733	25	0.382223	1.28711	0.128834	0.343564	1	1227
655	REGULATION OF TP53 ACTIVITY THROUGH ACETYLATION%REACTOME%R-HSA-6804758.3	18	0.405491	1.28704	0.116095	0.343182	1	1204
656	COPI-INDEPENDENT GOLGI-TO-ER RETROGRADE TRAFFIC%REACTOME DATABASE ID RELEASE 75%6811436	29	0.370402	1.28671	0.129794	0.34323	1	1965
657	REGULATION OF INTRACELLULAR PROTEIN TRANSPORT%GOBP%GO:0033157	104	0.28053	1.28569	0.0327103	0.344609	1	1407
658	PID_SYNDECAN_2_PATHWAY%MSIGDB_C2%PID_SYNDECAN_2_PATHWAY	29	0.371484	1.28556	0.117117	0.344286	1	2184
659	CHROMATIN MODIFYING ENZYMES%REACTOME%R-HSA-3247509.4	106	0.282721	1.28523	0.0470588	0.34441	1	1204
660	PROTEIN K63-LINKED UBIQUITINATION%GOBP%GO:0070534	17	0.421703	1.28498	0.147945	0.344368	1	499
661	SIGNALING BY LIGAND-RESPONSIVE EGFR VARIANTS IN CANCER%REACTOME%R-HSA-5637815.1	15	0.44534	1.28428	0.153846	0.345191	1	188
662	REGULATION OF DNA BINDING%GOBP%GO:0051101	32	0.351631	1.28337	0.116608	0.346372	1	1614
663	REGULATION OF CELL CYCLE CHECKPOINT%GOBP%GO:1901976	15	0.449155	1.28307	0.155844	0.346433	1	1884
664	NOVEL INTRACELLULAR COMPONENTS OF RIG-I-LIKE RECEPTOR (RLR) PATHWAY%WIKIPATHWAYS_20210210%WP3865%HOMO SAPIENS	23	0.381484	1.2825	0.121302	0.346933	1	1333
665	REGULATION OF RHO PROTEIN SIGNAL TRANSDUCTION%GOBP%GO:0035023	31	0.365696	1.28148	0.128049	0.348258	1	408
666	INORGANIC ION IMPORT ACROSS PLASMA MEMBRANE%GOBP%GO:0099587	27	0.36949	1.27846	0.112121	0.353394	1	1668
667	HALLMARK_UV_RESPONSE_DN%MSIGDB_C2%HALLMARK_UV_RESPONSE_DN	79	0.293992	1.27781	0.0691057	0.354155	1	1338
668	VEGFR1 SPECIFIC SIGNALS%PATHWAY INTERACTION DATABASE NCI-NATURE CURATED DATA%VEGFR1 SPECIFIC SIGNALS	20	0.402186	1.27641	0.153034	0.356413	1	991
669	POSITIVE REGULATION OF MULTI-ORGANISM PROCESS%GOBP%GO:0043902	104	0.276822	1.27591	0.0408163	0.3569	1	1412
670	CONSTITUTIVE SIGNALING BY LIGAND-RESPONSIVE EGFR CANCER VARIANTS%REACTOME%R-HSA-1236382.1	15	0.44534	1.27588	0.163934	0.356458	1	188
671	KSRP (KHSRP) BINDS AND DESTABILIZES MRNA%REACTOME%R-HSA-450604.2	15	0.435498	1.27567	0.176623	0.356348	1	853
672	REGULATION OF INTRACELLULAR TRANSPORT%GOBP%GO:0032386	190	0.252099	1.2755	0.0387597	0.356148	1	1408
673	ALZHEIMER DISEASE-AMYLOID SECRETASE PATHWAY%PANTHER PATHWAY%P00003	26	0.373108	1.27455	0.132768	0.357424	1	1033
674	SIGNALING BY PTK6%REACTOME%R-HSA-8848021.2	30	0.361378	1.27414	0.110119	0.357672	1	963
675	INTERSPECIES INTERACTION BETWEEN ORGANISMS%GOBP%GO:0044419	376	0.234417	1.27414	0	0.357163	1	826
676	REGULATION OF TISSUE REMODELING%GOBP%GO:0034103	26	0.373478	1.27273	0.145833	0.359367	1	802
677	SIGNALING BY NON-RECEPTOR TYROSINE KINASES%REACTOME%R-HSA-9006927.3	30	0.361378	1.27244	0.119601	0.359399	1	963
678	PID_FGF_PATHWAY%MSIGDB_C2%PID_FGF_PATHWAY	35	0.338346	1.27157	0.129825	0.360573	1	991
679	PID_RAC1_REG_PATHWAY%MSIGDB_C2%PID_RAC1_REG_PATHWAY	23	0.395657	1.27142	0.141479	0.360345	1	1217
680	INORGANIC CATION IMPORT ACROSS PLASMA MEMBRANE%GOBP%GO:0098659	27	0.36949	1.2709	0.132231	0.360827	1	1668
681	ACTIVATION OF ATR IN RESPONSE TO REPLICATION STRESS%REACTOME DATABASE ID RELEASE 75%176187	18	0.415437	1.26968	0.134831	0.362575	1	1785
682	NETRIN-1 SIGNALING%REACTOME%R-HSA-373752.2	22	0.392786	1.26945	0.136095	0.362491	1	1040
683	TRANSCRIPTIONAL REGULATION BY SMALL RNAS%REACTOME%R-HSA-5578749.3	62	0.303713	1.26932	0.0833333	0.362169	1	1296
684	CAMERA-TYPE EYE MORPHOGENESIS%GOBP%GO:0048593	20	0.401134	1.26906	0.181303	0.362177	1	326
685	SELECTIVE AUTOPHAGY%GOBP%GO:0061912	31	0.353308	1.26873	0.122024	0.362267	1	2148
686	POSITIVE REGULATION OF LAMELLIPODIUM ORGANIZATION%GOBP%GO:1902745	25	0.372954	1.2687	0.150568	0.361784	1	113
687	MESENCHYME MORPHOGENESIS%GOBP%GO:0072132	15	0.426162	1.26832	0.165761	0.362003	1	1025
688	REGULATION OF CELL DEVELOPMENT%GOBP%GO:0060284	279	0.246353	1.26759	0.0121951	0.362946	1	760
689	SEMAPHORIN-PLEXIN SIGNALING PATHWAY%GOBP%GO:0071526	28	0.365953	1.26738	0.146974	0.362839	1	790
690	RESPONSE TO AMINO ACID STARVATION%GOBP%GO:1990928	38	0.33782	1.26693	0.109589	0.363111	1	2440
691	SIGNALING BY NOTCH1%REACTOME DATABASE ID RELEASE 75%1980143	27	0.371338	1.26623	0.138973	0.363982	1	1617
692	PID_IL2_1PATHWAY%MSIGDB_C2%PID_IL2_1PATHWAY	35	0.344204	1.26556	0.122034	0.364784	1	1376
693	NON-SMALL CELL LUNG CANCER%WIKIPATHWAYS_20210210%WP4255%HOMO SAPIENS	40	0.336411	1.26545	0.09	0.36446	1	1034
694	GM-CSF%IOB%GM-CSF	59	0.310071	1.26458	0.112782	0.365678	1	1597
695	NEGATIVE REGULATION OF PHOSPHORYLATION%GOBP%GO:0042326	158	0.258605	1.26421	0.028777	0.365925	1	1566
696	COPII-MEDIATED VESICLE TRANSPORT%REACTOME%R-HSA-204005.4	47	0.320293	1.26376	0.097561	0.366241	1	2454
697	CARGO RECOGNITION FOR CLATHRIN-MEDIATED ENDOCYTOSIS%REACTOME%R-HSA-8856825.3	73	0.289964	1.26353	0.0686695	0.366228	1	1669
698	ORGANELLE LOCALIZATION BY MEMBRANE TETHERING%GOBP%GO:0140056	76	0.286465	1.26256	0.068	0.367656	1	2100
699	REGULATION OF CHROMATIN SILENCING%GOBP%GO:0031935	15	0.432392	1.26131	0.151436	0.369673	1	2391
700	IL-3 SIGNALING PATHWAY%WIKIPATHWAYS_20210210%WP286%HOMO SAPIENS	30	0.35408	1.26111	0.135952	0.369583	1	604
701	ARF6 TRAFFICKING EVENTS%PATHWAY INTERACTION DATABASE NCI-NATURE CURATED DATA%ARF6 TRAFFICKING EVENTS	38	0.328645	1.26088	0.101852	0.369515	1	2382
702	PID_FAS_PATHWAY%MSIGDB_C2%PID_FAS_PATHWAY	21	0.396041	1.25988	0.151685	0.37093	1	1249
703	REGULATION OF ENDOCYTOSIS%GOBP%GO:0030100	135	0.260013	1.25943	0.0363636	0.371332	1	1238
704	REGULATION OF PROTEIN IMPORT%GOBP%GO:1904589	24	0.366749	1.25905	0.151163	0.37156	1	1045
705	RANKL%NETPATH%RANKL	45	0.31698	1.25902	0.128114	0.371084	1	1034
706	REGULATION OF RECEPTOR INTERNALIZATION%GOBP%GO:0002090	22	0.387761	1.2589	0.13355	0.370812	1	340
707	SENSORY PERCEPTION OF MECHANICAL STIMULUS%GOBP%GO:0050954	40	0.326746	1.25889	0.119122	0.370304	1	1271
708	FRAGILE X SYNDROME %WIKIPATHWAYS_20210210%WP4549%HOMO SAPIENS	67	0.292869	1.25743	0.0833333	0.372737	1	1756
709	REGULATION OF UBIQUITIN-PROTEIN TRANSFERASE ACTIVITY%GOBP%GO:0051438	19	0.398617	1.25729	0.152778	0.372481	1	2851
710	SIGNALING EVENTS MEDIATED BY FOCAL ADHESION KINASE%PATHWAY INTERACTION DATABASE NCI-NATURE CURATED DATA%SIGNALING EVENTS MEDIATED BY FOCAL ADHESION KINASE	44	0.321397	1.25595	0.125	0.374516	1	1034
711	FLT3 SIGNALING%REACTOME%R-HSA-9607240.5	23	0.373889	1.25527	0.146814	0.375288	1	604
712	REGULATION OF AXON GUIDANCE%GOBP%GO:1902667	22	0.38484	1.25509	0.15493	0.375088	1	49
713	VALIDATED TRANSCRIPTIONAL TARGETS OF DELTANP63 ISOFORMS%PATHWAY INTERACTION DATABASE NCI-NATURE CURATED DATA%VALIDATED TRANSCRIPTIONAL TARGETS OF DELTANP63 ISOFORMS	25	0.375889	1.25506	0.134897	0.37461	1	1291
714	REGULATION OF HISTONE MODIFICATION%GOBP%GO:0031056	55	0.30938	1.25453	0.113475	0.375259	1	1764
715	SUPERPATHWAY OF INOSITOL PHOSPHATE COMPOUNDS%HUMANCYC%PWY-6371	33	0.34497	1.25375	0.119874	0.376336	1	1529
716	CELL CYCLE, MITOTIC%REACTOME%R-HSA-69278.4	317	0.236433	1.25292	0.0285714	0.377495	1	2070
717	REGULATION OF RESPONSE TO DNA DAMAGE STIMULUS%GOBP%GO:2001020	81	0.283404	1.25241	0.0675105	0.378008	1	1803
718	HALLMARK_PROTEIN_SECRETION%MSIGDB_C2%HALLMARK_PROTEIN_SECRETION	85	0.278672	1.25187	0.0621762	0.378563	1	2042
719	REGULATION OF CELL-MATRIX ADHESION%GOBP%GO:0001952	67	0.291755	1.25162	0.0991735	0.378587	1	1037
720	REGULATION OF TYPE I INTERFERON PRODUCTION%GOBP%GO:0032479	61	0.301487	1.24996	0.0819672	0.381348	1	803
721	REGULATION OF CHEMOKINE PRODUCTION%GOBP%GO:0032642	29	0.356212	1.24979	0.142384	0.381115	1	1330
722	RNA POLYMERASE I PROMOTER CLEARANCE%REACTOME DATABASE ID RELEASE 75%73854	52	0.309281	1.24835	0.110727	0.383439	1	1204
723	ACTIVATION OF THE PRE-REPLICATIVE COMPLEX%REACTOME DATABASE ID RELEASE 75%68962	15	0.424747	1.24817	0.180157	0.38325	1	2052
724	PROTEIN AUTOPHOSPHORYLATION%GOBP%GO:0046777	70	0.28816	1.24797	0.0737705	0.383145	1	839
725	T-CELL ANTIGEN RECEPTOR (TCR) SIGNALING PATHWAY%WIKIPATHWAYS_20210210%WP69%HOMO SAPIENS	45	0.323577	1.24733	0.133562	0.384008	1	1034
726	MITOTIC CELL CYCLE%GOBP%GO:0000278	331	0.236286	1.24724	0.0131579	0.383668	1	1418
727	RESPONSE TO GLUCOSE%GOBP%GO:0009749	25	0.369975	1.24707	0.151057	0.383466	1	1376
728	ERBB SIGNALING PATHWAY%GOBP%GO:0038127	38	0.327279	1.2462	0.133117	0.384771	1	188
729	CLATHRIN-MEDIATED ENDOCYTOSIS%REACTOME%R-HSA-8856828.3	105	0.268312	1.24599	0.0564103	0.384683	1	1779
730	PID_EPHB_FWD_PATHWAY%MSIGDB_C2%PID_EPHB_FWD_PATHWAY	36	0.331423	1.24586	0.125874	0.384362	1	1581
731	FAS (CD95) SIGNALING PATHWAY%PATHWAY INTERACTION DATABASE NCI-NATURE CURATED DATA%FAS (CD95) SIGNALING PATHWAY	21	0.396041	1.24583	0.172012	0.383881	1	1249
732	REGULATION OF ALTERNATIVE MRNA SPLICING, VIA SPLICEOSOME%GOBP%GO:0000381	31	0.344218	1.24545	0.145511	0.384132	1	2063
733	REGULATION OF PROTEIN TRANSPORT%GOBP%GO:0051223	198	0.242633	1.24487	0.0245902	0.38474	1	1407
734	SIGNAL TRANSDUCTION INVOLVED IN DNA DAMAGE CHECKPOINT%GOBP%GO:0072422	28	0.34886	1.24438	0.137931	0.385153	1	1316
735	PROTEIN-DNA COMPLEX SUBUNIT ORGANIZATION%GOBP%GO:0071824	144	0.257063	1.24382	0.0506329	0.385791	1	1808
736	NEGATIVE REGULATION OF OXIDATIVE STRESS-INDUCED CELL DEATH%GOBP%GO:1903202	19	0.392126	1.24275	0.162011	0.387334	1	994
737	REGULATION OF MITOTIC NUCLEAR DIVISION%GOBP%GO:0007088	80	0.283556	1.24264	0.105691	0.38706	1	1884
738	PID_BCR_5PATHWAY%MSIGDB_C2%PID_BCR_5PATHWAY	36	0.337343	1.24182	0.115512	0.388191	1	379
739	POSITIVE REGULATION OF NERVOUS SYSTEM DEVELOPMENT%GOBP%GO:0051962	132	0.260222	1.24174	0.0264901	0.387823	1	596
740	CELL CYCLE%REACTOME DATABASE ID RELEASE 75%1640170	372	0.229385	1.24157	0	0.387639	1	2070
741	RNA POLYMERASE I TRANSCRIPTION%REACTOME DATABASE ID RELEASE 75%73864	53	0.307499	1.24117	0.108333	0.388024	1	1204
742	NEGATIVE REGULATION OF RESPONSE TO OXIDATIVE STRESS%GOBP%GO:1902883	19	0.392126	1.24039	0.187328	0.38899	1	994
743	PROTEIN PHOSPHORYLATION%GOBP%GO:0006468	351	0.231233	1.24027	0	0.388719	1	1388
744	REGULATION OF GLUCOSE IMPORT%GOBP%GO:0046324	20	0.38108	1.23942	0.174387	0.3899	1	155
745	NEGATIVE REGULATION OF MRNA CATABOLIC PROCESS%GOBP%GO:1902373	23	0.379019	1.23752	0.162242	0.393414	1	2080
746	RMTS METHYLATE HISTONE ARGININES%REACTOME DATABASE ID RELEASE 75%3214858	37	0.329598	1.23725	0.162791	0.393439	1	1393
747	HISTAMINE H1 RECEPTOR MEDIATED SIGNALING PATHWAY%PANTHER PATHWAY%P04385	26	0.359745	1.23719	0.140244	0.393053	1	1529
748	REGULATION OF OXIDATIVE STRESS-INDUCED CELL DEATH%GOBP%GO:1903201	27	0.357843	1.23684	0.181548	0.393267	1	1173
749	CELL CYCLE%GOBP%GO:0007049	445	0.224337	1.23653	0	0.393417	1	1606
750	EPHB FORWARD SIGNALING%PATHWAY INTERACTION DATABASE NCI-NATURE CURATED DATA%EPHB FORWARD SIGNALING	36	0.331423	1.23629	0.127869	0.393511	1	1581
751	EPIDERMAL GROWTH FACTOR RECEPTOR SIGNALING PATHWAY%GOBP%GO:0007173	28	0.355142	1.23615	0.152975	0.393288	1	188
752	IL1-MEDIATED SIGNALING EVENTS%PATHWAY INTERACTION DATABASE NCI-NATURE CURATED DATA%IL1-MEDIATED SIGNALING EVENTS	20	0.388321	1.23588	0.174847	0.393337	1	687
753	BCR SIGNALING PATHWAY%PATHWAY INTERACTION DATABASE NCI-NATURE CURATED DATA%BCR SIGNALING PATHWAY	37	0.331409	1.23585	0.146429	0.392876	1	379
754	RESOLUTION OF AP SITES VIA THE MULTIPLE-NUCLEOTIDE PATCH REPLACEMENT PATHWAY%REACTOME%R-HSA-110373.2	18	0.397615	1.23511	0.172316	0.393816	1	1785
755	CHROMATIN SILENCING%GOBP%GO:0006342	36	0.328354	1.23486	0.125413	0.393858	1	2043
756	B CELL RECEPTOR SIGNALING PATHWAY%WIKIPATHWAYS_20210210%WP23%HOMO SAPIENS	58	0.3001	1.23423	0.129151	0.394666	1	1034
757	REGULATION OF CELL MORPHOGENESIS%GOBP%GO:0022604	194	0.245356	1.23419	0.0229008	0.394257	1	790
758	NOTCH SIGNALING PATHWAY NETPATH%WIKIPATHWAYS_20210210%WP61%HOMO SAPIENS	28	0.358984	1.23398	0.179331	0.394154	1	752
759	ORGANELLE DISASSEMBLY%GOBP%GO:1903008	36	0.337747	1.23386	0.145897	0.39391	1	1364
760	RESPONSE TO NUTRIENT LEVELS%GOBP%GO:0031667	101	0.270828	1.23366	0.0779816	0.39384	1	1620
761	REGULATION OF CELL CYCLE G2/M PHASE TRANSITION%GOBP%GO:1902749	114	0.263942	1.23365	0.0574713	0.393333	1	2100
762	SYMBIONT PROCESS%GOBP%GO:0044403	363	0.229433	1.23346	0	0.393227	1	826
763	REGULATION OF TRANSFORMING GROWTH FACTOR BETA RECEPTOR SIGNALING PATHWAY%GOBP%GO:0017015	48	0.312241	1.23312	0.144295	0.393449	1	1238
764	G2 M CHECKPOINTS%REACTOME%R-HSA-69481.3	104	0.26744	1.23304	0.0717949	0.393106	1	1785
765	MATURATION OF SSU-RRNA%GOBP%GO:0030490	24	0.368441	1.23304	0.155425	0.392596	1	2040
766	OXIDATIVE STRESS INDUCED SENESCENCE%REACTOME%R-HSA-2559580.4	56	0.302399	1.23199	0.121528	0.39421	1	1804
767	REGULATION OF BINDING%GOBP%GO:0051098	128	0.263223	1.23194	0.0740741	0.393813	1	1614
768	REGULATION OF NUCLEAR DIVISION%GOBP%GO:0051783	82	0.28019	1.23186	0.0958904	0.393428	1	1884
769	REGULATION OF CYTOSKELETON ORGANIZATION%GOBP%GO:0051493	268	0.239561	1.23178	0.0227273	0.393092	1	1622
770	PALLIUM DEVELOPMENT%GOBP%GO:0021543	28	0.357395	1.23171	0.16763	0.392735	1	1917
771	MITOTIC NUCLEAR DIVISION%GOBP%GO:0140014	84	0.283229	1.23103	0.102326	0.393647	1	1316
772	PID_TGFBR_PATHWAY%MSIGDB_C2%PID_TGFBR_PATHWAY	35	0.331042	1.23032	0.150307	0.394645	1	578
773	BASE-EXCISION REPAIR, GAP-FILLING%GOBP%GO:0006287	20	0.383825	1.22994	0.174286	0.394975	1	1803
774	NEGATIVE REGULATION OF INTRACELLULAR SIGNAL TRANSDUCTION%GOBP%GO:1902532	183	0.243871	1.22967	0.0330578	0.395068	1	1614
775	REGULATION OF CELLULAR RESPONSE TO TRANSFORMING GROWTH FACTOR BETA STIMULUS%GOBP%GO:1903844	48	0.312241	1.22924	0.130742	0.39546	1	1238
776	WNT%IOB%WNT	52	0.302356	1.22924	0.130742	0.394961	1	1587
777	PID_FAK_PATHWAY%MSIGDB_C2%PID_FAK_PATHWAY	45	0.317711	1.2288	0.14966	0.395286	1	1034
778	RESPONSE TO EXTRACELLULAR STIMULUS%GOBP%GO:0009991	109	0.266578	1.2287	0.0810811	0.395018	1	1620
779	NCRNA PROCESSING%GOBP%GO:0034470	221	0.240291	1.22705	0.0471698	0.398007	1	1472
780	SIGNAL TRANSDUCTION INVOLVED IN DNA INTEGRITY CHECKPOINT%GOBP%GO:0072401	28	0.34886	1.22675	0.174174	0.398118	1	1316
781	BRAIN-DERIVED NEUROTROPHIC FACTOR (BDNF) SIGNALING PATHWAY%WIKIPATHWAYS_20210210%WP2380%HOMO SAPIENS	83	0.273676	1.22584	0.0940594	0.399579	1	1565
782	RESPONSE TO DSRNA%GOBP%GO:0043331	15	0.410072	1.22493	0.220779	0.40092	1	2006
783	CORTICAL ACTIN CYTOSKELETON ORGANIZATION%GOBP%GO:0030866	20	0.379579	1.22433	0.208955	0.401732	1	1022
784	REGULATION OF MICROTUBULE POLYMERIZATION%GOBP%GO:0031113	34	0.333378	1.2239	0.13871	0.402097	1	1613
785	INHIBITION OF EXOSOME BIOGENESIS AND SECRETION BY MANUMYCIN A IN CRPC CELLS%WIKIPATHWAYS_20210210%WP4301%HOMO SAPIENS	16	0.416548	1.22295	0.197674	0.403577	1	2237
786	PID_EPHA2_FWD_PATHWAY%MSIGDB_C2%PID_EPHA2_FWD_PATHWAY	17	0.401825	1.22272	0.195906	0.403552	1	1247
787	ORGANELLE LOCALIZATION%GOBP%GO:0051640	300	0.233593	1.22255	0.0151515	0.403387	1	1722
788	POSITIVE REGULATION OF TRANSMEMBRANE TRANSPORT%GOBP%GO:0034764	71	0.280958	1.22215	0.103139	0.403732	1	1913
789	PID_ARF6_TRAFFICKING_PATHWAY%MSIGDB_C2%PID_ARF6_TRAFFICKING_PATHWAY	38	0.328645	1.22159	0.157051	0.404277	1	2382
790	HALLMARK_G2M_CHECKPOINT%MSIGDB_C2%HALLMARK_G2M_CHECKPOINT	115	0.260834	1.2215	0.0792079	0.403973	1	1362
791	WNT%NETPATH%WNT	53	0.299515	1.22068	0.14539	0.405197	1	1587
792	FOCAL ADHESION%WIKIPATHWAYS_20210210%WP306%HOMO SAPIENS	142	0.2515	1.22006	0.0505618	0.405951	1	1326
793	EPHA2 FORWARD SIGNALING%PATHWAY INTERACTION DATABASE NCI-NATURE CURATED DATA%EPHA2 FORWARD SIGNALING	17	0.401825	1.22004	0.208108	0.405472	1	1247
794	ARTERY DEVELOPMENT%GOBP%GO:0060840	21	0.381967	1.21893	0.217143	0.407397	1	595
795	RRNA PROCESSING%REACTOME DATABASE ID RELEASE 75%72312	160	0.247742	1.21887	0.037037	0.407062	1	1472
796	16P11.2 DISTAL DELETION SYNDROME%WIKIPATHWAYS_20210210%WP4950%HOMO SAPIENS	15	0.425934	1.21805	0.19891	0.408357	1	1972
797	NEGATIVE REGULATION OF CELLULAR RESPONSE TO OXIDATIVE STRESS%GOBP%GO:1900408	19	0.392126	1.21741	0.208589	0.409234	1	994
798	NEGATIVE REGULATION OF CHROMOSOME ORGANIZATION%GOBP%GO:2001251	54	0.297945	1.21678	0.141129	0.410083	1	1759
799	NCRNA EXPORT FROM NUCLEUS%GOBP%GO:0097064	32	0.337709	1.21594	0.158065	0.411398	1	1460
800	ENDOPLASMIC RETICULUM STRESS RESPONSE IN CORONAVIRUS INFECTION%WIKIPATHWAYS_20210210%WP4861%HOMO SAPIENS	15	0.418982	1.21576	0.225201	0.411209	1	1278
801	PID_BETA_CATENIN_NUC_PATHWAY%MSIGDB_C2%PID_BETA_CATENIN_NUC_PATHWAY	31	0.338851	1.21557	0.149682	0.41108	1	1568
802	PDGFR-BETA SIGNALING PATHWAY%PATHWAY INTERACTION DATABASE NCI-NATURE CURATED DATA%PDGFR-BETA SIGNALING PATHWAY	99	0.266596	1.21538	0.111111	0.41101	1	1285
803	REGULATION OF NUCLEAR BETA CATENIN SIGNALING AND TARGET GENE TRANSCRIPTION%PATHWAY INTERACTION DATABASE NCI-NATURE CURATED DATA%REGULATION OF NUCLEAR BETA CATENIN SIGNALING AND TARGET GENE TRANSCRIPTION	31	0.338851	1.21474	0.186047	0.411956	1	1568
804	REGULATION OF PROTEIN TARGETING%GOBP%GO:1903533	34	0.331507	1.21431	0.166667	0.412373	1	1257
805	AGE/RAGE PATHWAY%WIKIPATHWAYS_20210210%WP2324%HOMO SAPIENS	45	0.31397	1.21414	0.146953	0.412204	1	1034
806	PID_ERA_GENOMIC_PATHWAY%MSIGDB_C2%PID_ERA_GENOMIC_PATHWAY	22	0.363868	1.21215	0.195055	0.415933	1	1786
807	SLC-MEDIATED TRANSMEMBRANE TRANSPORT%REACTOME DATABASE ID RELEASE 75%425407	97	0.265474	1.21179	0.0604651	0.416238	1	1426
808	REGULATION OF PEPTIDE TRANSPORT%GOBP%GO:0090087	202	0.237102	1.21128	0.00862069	0.416815	1	1407
809	DUAL INCISION IN GG-NER%REACTOME%R-HSA-5696400.1	22	0.374242	1.2109	0.185286	0.417112	1	1785
810	SIGNALING BY RECEPTOR TYROSINE KINASES%REACTOME DATABASE ID RELEASE 75%9006934	287	0.23399	1.21049	0.016129	0.417454	1	1323
811	IL3%NETPATH%IL3	53	0.29974	1.20991	0.149254	0.4182	1	1034
812	FSH%NETPATH%FSH	27	0.348209	1.2097	0.185294	0.41813	1	2467
813	CELL PROJECTION MORPHOGENESIS%GOBP%GO:0048858	205	0.234722	1.20962	0.0194175	0.417809	1	993
814	NEGATIVE REGULATION OF CYTOSKELETON ORGANIZATION%GOBP%GO:0051494	72	0.281158	1.20901	0.131356	0.418633	1	1271
815	DNA STRAND ELONGATION%REACTOME DATABASE ID RELEASE 75%69190	25	0.349046	1.20881	0.163743	0.418575	1	1785
816	POSITIVE REGULATION OF CELL DEVELOPMENT%GOBP%GO:0010720	154	0.251554	1.20609	0.0925926	0.424009	1	790
817	SMALL CELL LUNG CANCER%WIKIPATHWAYS_20210210%WP4658%HOMO SAPIENS	51	0.296379	1.20529	0.147887	0.425158	1	1741
818	ENDODERM DIFFERENTIATION%WIKIPATHWAYS_20210210%WP2853%HOMO SAPIENS	49	0.299314	1.20516	0.147601	0.424915	1	1544
819	POSITIVE REGULATION OF WNT SIGNALING PATHWAY%GOBP%GO:0030177	98	0.268319	1.20462	0.0896861	0.425605	1	1711
820	DNA REPLICATION INITIATION%GOBP%GO:0006270	19	0.390669	1.20435	0.213889	0.425706	1	2052
821	PLASMA MEMBRANE BOUNDED CELL PROJECTION MORPHOGENESIS%GOBP%GO:0120039	202	0.23717	1.20379	0.045045	0.426523	1	993
822	HIV INFECTION%REACTOME%R-HSA-162906.1	180	0.244202	1.20302	0.0839695	0.427603	1	1323
823	E3 UBIQUITIN LIGASES UBIQUITINATE TARGET PROTEINS%REACTOME%R-HSA-8866654.3	39	0.313954	1.20277	0.183007	0.427616	1	1507
824	NEGATIVE REGULATION OF CELL COMMUNICATION%GOBP%GO:0010648	479	0.211485	1.20266	0.04	0.427321	1	1328
825	IRON UPTAKE AND TRANSPORT%REACTOME DATABASE ID RELEASE 75%917937	41	0.310736	1.20248	0.14094	0.427232	1	1620
826	VESICLE DOCKING INVOLVED IN EXOCYTOSIS%GOBP%GO:0006904	21	0.367593	1.20217	0.200528	0.427402	1	900
827	PID_IL1_PATHWAY%MSIGDB_C2%PID_IL1_PATHWAY	20	0.388321	1.20182	0.201149	0.427661	1	687
828	CHROMOSOME SEGREGATION%GOBP%GO:0007059	100	0.261667	1.20168	0.087963	0.42747	1	1225
829	POSITIVE REGULATION OF PROTEIN TRANSPORT%GOBP%GO:0051222	128	0.254961	1.20142	0.0670391	0.427515	1	1407
830	PID_EPHRINB_REV_PATHWAY%MSIGDB_C2%PID_EPHRINB_REV_PATHWAY	26	0.350791	1.20053	0.163009	0.428991	1	1289
831	CELL MORPHOGENESIS%GOBP%GO:0000902	273	0.229756	1.20028	0.0243902	0.429008	1	799
832	RRNA PROCESSING IN THE NUCLEUS AND CYTOSOL%REACTOME DATABASE ID RELEASE 75%8868773	158	0.243528	1.19987	0.0606061	0.429449	1	1472
833	SENESCENCE-ASSOCIATED SECRETORY PHENOTYPE (SASP)%REACTOME%R-HSA-2559582.2	54	0.287999	1.19975	0.106719	0.429172	1	2279
834	PID_TAP63_PATHWAY%MSIGDB_C2%PID_TAP63_PATHWAY	25	0.35484	1.19923	0.199468	0.429768	1	1422
835	CELLULAR RESPONSE TO EPIDERMAL GROWTH FACTOR STIMULUS%GOBP%GO:0071364	15	0.417797	1.1988	0.229381	0.430191	1	2182
836	PID_PDGFRB_PATHWAY%MSIGDB_C2%PID_PDGFRB_PATHWAY	99	0.266596	1.19836	0.0969388	0.4306	1	1285
837	NEGATIVE REGULATION OF STRESS-ACTIVATED MAPK CASCADE%GOBP%GO:0032873	16	0.399639	1.19795	0.225071	0.431101	1	794
838	DDX58 IFIH1-MEDIATED INDUCTION OF INTERFERON-ALPHA BETA%REACTOME%R-HSA-168928.7	35	0.325473	1.19686	0.15873	0.432821	1	802
839	PROTEIN DEUBIQUITINATION%GOBP%GO:0016579	115	0.25226	1.19651	0.068421	0.433095	1	1302
840	REGULATION OF MICROTUBULE POLYMERIZATION OR DEPOLYMERIZATION%GOBP%GO:0031110	47	0.301139	1.19575	0.154639	0.434155	1	1456
841	REGULATION OF G2/M TRANSITION OF MITOTIC CELL CYCLE%GOBP%GO:0010389	108	0.256453	1.19494	0.110526	0.435336	1	2100
842	POSITIVE REGULATION OF PROTEOLYSIS%GOBP%GO:0045862	142	0.24474	1.19468	0.0784314	0.435336	1	1330
843	ESTABLISHMENT OF ORGANELLE LOCALIZATION%GOBP%GO:0051656	219	0.23196	1.19438	0.0263158	0.435493	1	1722
844	REGULATION OF OXIDATIVE STRESS-INDUCED INTRINSIC APOPTOTIC SIGNALING PATHWAY%GOBP%GO:1902175	15	0.411508	1.19387	0.219212	0.436135	1	994
845	REGULATION OF SODIUM ION TRANSMEMBRANE TRANSPORTER ACTIVITY%GOBP%GO:2000649	23	0.355956	1.19355	0.214854	0.436325	1	1201
846	REGULATION OF EXOCYTOSIS%GOBP%GO:0017157	85	0.265822	1.19332	0.0863636	0.436299	1	1826
847	NEGATIVE REGULATION OF SIGNAL TRANSDUCTION%GOBP%GO:0009968	465	0.211234	1.1933	0.0344828	0.435822	1	1328
848	CYTOSOLIC SENSORS OF PATHOGEN-ASSOCIATED DNA%REACTOME%R-HSA-1834949.1	39	0.316426	1.19242	0.203226	0.437282	1	499
849	ALPHA4 BETA1 INTEGRIN SIGNALING EVENTS%PATHWAY INTERACTION DATABASE NCI-NATURE CURATED DATA%ALPHA4 BETA1 INTEGRIN SIGNALING EVENTS	28	0.340354	1.19223	0.195266	0.437227	1	2280
850	ACTIN CYTOSKELETON REORGANIZATION%GOBP%GO:0031532	35	0.319894	1.19216	0.179012	0.436892	1	520
851	CYTOSOLIC TRNA AMINOACYLATION%REACTOME%R-HSA-379716.1	24	0.353607	1.19138	0.207865	0.438078	1	4189
852	VALIDATED TRANSCRIPTIONAL TARGETS OF TAP63 ISOFORMS%PATHWAY INTERACTION DATABASE NCI-NATURE CURATED DATA%VALIDATED TRANSCRIPTIONAL TARGETS OF TAP63 ISOFORMS	25	0.35484	1.19116	0.200557	0.438113	1	1422
853	GASTRIN SIGNALING PATHWAY%WIKIPATHWAYS_20210210%WP4659%HOMO SAPIENS	68	0.273001	1.19076	0.144628	0.438391	1	1333
854	ATP-DEPENDENT CHROMATIN REMODELING%GOBP%GO:0043044	33	0.322604	1.19069	0.191223	0.438021	1	1204
855	KITRECEPTOR%IOB%KITRECEPTOR	53	0.290909	1.19015	0.164794	0.438708	1	1291
856	CHROMOSOME MAINTENANCE%REACTOME DATABASE ID RELEASE 75%73886	73	0.275903	1.18963	0.127049	0.439331	1	1718
857	REGULATION OF T CELL RECEPTOR SIGNALING PATHWAY%GOBP%GO:0050856	19	0.386891	1.18945	0.237838	0.439193	1	2187
858	EPHRIN B REVERSE SIGNALING%PATHWAY INTERACTION DATABASE NCI-NATURE CURATED DATA%EPHRIN B REVERSE SIGNALING	22	0.368866	1.18861	0.19774	0.440572	1	1289
859	PROTEIN UBIQUITINATION%GOBP%GO:0016567	207	0.23423	1.18804	0.0747663	0.441366	1	1711
860	CELLULAR COMPONENT DISASSEMBLY%GOBP%GO:0022411	208	0.234976	1.18769	0.0660377	0.44163	1	1751
861	MONOVALENT INORGANIC CATION HOMEOSTASIS%GOBP%GO:0055067	57	0.284238	1.18715	0.149425	0.442273	1	1723
862	REGULATION OF SUPRAMOLECULAR FIBER ORGANIZATION%GOBP%GO:1902903	199	0.240032	1.18674	0.0925926	0.442637	1	1728
863	VIRAL TRANSLATION%GOBP%GO:0019081	16	0.400372	1.18616	0.247813	0.443481	1	2849
864	REGULATION OF LAMELLIPODIUM ASSEMBLY%GOBP%GO:0010591	25	0.346243	1.18579	0.190184	0.443801	1	113
865	CHAPERONIN-MEDIATED PROTEIN FOLDING%REACTOME DATABASE ID RELEASE 75%390466	63	0.280737	1.18573	0.132479	0.443424	1	691
866	NEGATIVE REGULATION OF CELLULAR RESPONSE TO GROWTH FACTOR STIMULUS%GOBP%GO:0090288	68	0.281481	1.18568	0.124464	0.443039	1	595
867	PATHOGENIC ESCHERICHIA COLI INFECTION%WIKIPATHWAYS_20210210%WP2272%HOMO SAPIENS	49	0.293167	1.18532	0.178571	0.443321	1	455
868	NEGATIVE REGULATION OF SIGNALING%GOBP%GO:0023057	481	0.212646	1.18483	0.025641	0.443843	1	1328
869	NON-INTEGRIN MEMBRANE-ECM INTERACTIONS%REACTOME%R-HSA-3000171.2	40	0.316059	1.18454	0.185668	0.443949	1	1883
870	NEGATIVE REGULATION OF TRANSPORT%GOBP%GO:0051051	155	0.243204	1.18452	0.0704225	0.443491	1	1333
871	NUCLEAR CHROMOSOME SEGREGATION%GOBP%GO:0098813	80	0.275752	1.18391	0.149798	0.444237	1	1225
872	REGULATION OF CELL CYCLE%GOBP%GO:0051726	425	0.21846	1.18383	0.0204082	0.443888	1	1846
873	PROTEOLYSIS%GOBP%GO:0006508	472	0.216479	1.18364	0.030303	0.443771	1	1716
874	DEFENSE RESPONSE TO BACTERIUM%GOBP%GO:0042742	82	0.264858	1.183	0.157658	0.444704	1	786
875	POSITIVE REGULATION OF TELOMERE MAINTENANCE%GOBP%GO:0032206	28	0.336397	1.18227	0.18956	0.445814	1	575
876	CARGO LOADING INTO VESICLE%GOBP%GO:0035459	15	0.400882	1.1818	0.23622	0.446427	1	2570
877	NUCLEAR DIVISION%GOBP%GO:0000280	102	0.258501	1.17979	0.122449	0.450481	1	1255
878	PEPTIDYL-SERINE MODIFICATION%GOBP%GO:0018209	82	0.27272	1.17975	0.119266	0.450034	1	1033
879	INTRACELLULAR PROTEIN TRANSPORT%GOBP%GO:0006886	476	0.215912	1.17853	0	0.45234	1	2042
880	TRANSLATIONAL INITIATION%GOBP%GO:0006413	116	0.249909	1.17848	0.0833333	0.451942	1	2399
881	EBOLA VIRUS PATHWAY ON HOST%WIKIPATHWAYS_20210210%WP4217%HOMO SAPIENS	90	0.261232	1.17737	0.108374	0.453883	1	793
882	NEGATIVE REGULATION OF PHOSPHORUS METABOLIC PROCESS%GOBP%GO:0010563	199	0.236906	1.17642	0.0569106	0.45569	1	1566
883	RESPONSE TO MONOSACCHARIDE%GOBP%GO:0034284	27	0.341812	1.17579	0.226471	0.456597	1	1376
884	REGULATION OF ESTABLISHMENT OF PROTEIN LOCALIZATION%GOBP%GO:0070201	221	0.22923	1.17492	0.039604	0.458066	1	1407
885	OPIOID PROENKEPHALIN PATHWAY%PANTHER PATHWAY%P05915	18	0.382875	1.17458	0.229651	0.458266	1	1569
886	AMMONIUM TRANSPORT%GOBP%GO:0015696	18	0.389224	1.17452	0.260623	0.457885	1	1351
887	ACTIVATION OF GTPASE ACTIVITY%GOBP%GO:0090630	34	0.322412	1.17451	0.187311	0.457406	1	638
888	REGULATION OF NEUROTRANSMITTER TRANSPORT%GOBP%GO:0051588	35	0.32866	1.17446	0.2	0.456988	1	2129
889	REGULATION OF FOCAL ADHESION ASSEMBLY%GOBP%GO:0051893	39	0.302158	1.17422	0.207237	0.457011	1	1224
890	POSITIVE REGULATION OF ORGANELLE ORGANIZATION%GOBP%GO:0010638	295	0.220854	1.17394	0.0405405	0.457156	1	1562
891	MTOR SIGNALING PATHWAY%PATHWAY INTERACTION DATABASE NCI-NATURE CURATED DATA%MTOR SIGNALING PATHWAY	40	0.308219	1.173	0.203175	0.458857	1	1586
892	RESPONSE TO HEXOSE%GOBP%GO:0009746	27	0.341812	1.17238	0.211111	0.459749	1	1376
893	CORTOCOTROPIN RELEASING FACTOR RECEPTOR SIGNALING PATHWAY%PANTHER PATHWAY%P04380	18	0.384609	1.17216	0.261128	0.45976	1	2374
894	REGULATION OF G PROTEIN-COUPLED RECEPTOR SIGNALING PATHWAY%GOBP%GO:0008277	45	0.299322	1.17201	0.17037	0.459604	1	1757
895	NEURON PROJECTION DEVELOPMENT%GOBP%GO:0031175	260	0.221902	1.17139	0.0430108	0.460505	1	790
896	CHROMATIN REMODELING%GOBP%GO:0006338	55	0.295405	1.17083	0.177419	0.461226	1	1394
897	NEURON PROJECTION MORPHOGENESIS%GOBP%GO:0048812	199	0.234287	1.17056	0.0900901	0.461357	1	790
898	AMINO ACIDS REGULATE MTORC1%REACTOME DATABASE ID RELEASE 75%9639288	30	0.319231	1.16925	0.219941	0.463938	1	1620
899	JNK CASCADE%GOBP%GO:0007254	26	0.342406	1.16898	0.19186	0.463997	1	341
900	TRNA EXPORT FROM NUCLEUS%GOBP%GO:0006409	30	0.327848	1.16893	0.203647	0.463576	1	1460
901	EXOCYTIC PROCESS%GOBP%GO:0140029	32	0.318977	1.1675	0.20122	0.466293	1	900
902	POSITIVE REGULATION OF FOCAL ADHESION ASSEMBLY%GOBP%GO:0051894	15	0.398703	1.16682	0.256927	0.467334	1	815
903	TARGET OF RAPAMYCIN (TOR) SIGNALING%WIKIPATHWAYS_20210210%WP1471%HOMO SAPIENS	16	0.397654	1.16632	0.268657	0.467931	1	1603
904	RIBOSOMAL SMALL SUBUNIT BIOGENESIS%GOBP%GO:0042274	42	0.304203	1.16583	0.186885	0.468555	1	1345
905	NUCLEOTIDE-BINDING OLIGOMERIZATION DOMAIN CONTAINING SIGNALING PATHWAY%GOBP%GO:0070423	15	0.402964	1.16482	0.251309	0.47039	1	882
906	PLC BETA MEDIATED EVENTS%REACTOME DATABASE ID RELEASE 75%112043	36	0.314584	1.16452	0.19863	0.470612	1	774
907	WNT SIGNALING PATHWAY (NETPATH)%WIKIPATHWAYS_20210210%WP363%HOMO SAPIENS	23	0.353078	1.16451	0.229508	0.470118	1	1748
908	PID_IL4_2PATHWAY%MSIGDB_C2%PID_IL4_2PATHWAY	30	0.326176	1.16395	0.236527	0.47085	1	1528
909	MITOTIC PROMETAPHASE%REACTOME%R-HSA-68877.5	106	0.249627	1.16388	0.120192	0.470578	1	1346
910	PID_CXCR4_PATHWAY%MSIGDB_C2%PID_CXCR4_PATHWAY	71	0.272679	1.16377	0.189922	0.470282	1	1016
911	REGULATION OF PROTEIN CATABOLIC PROCESS%GOBP%GO:0042176	167	0.235505	1.16356	0.102941	0.470252	1	1300
912	NEGATIVE REGULATION OF SECRETION%GOBP%GO:0051048	34	0.311708	1.16341	0.193443	0.47007	1	1219
913	REGULATION OF CANONICAL WNT SIGNALING PATHWAY%GOBP%GO:0060828	131	0.242467	1.16332	0.0944444	0.469784	1	1800
914	REGULATION OF CELL SIZE%GOBP%GO:0008361	67	0.272521	1.16308	0.144231	0.469819	1	1728
915	PID_NECTIN_PATHWAY%MSIGDB_C2%PID_NECTIN_PATHWAY	28	0.325552	1.16302	0.218462	0.469446	1	2382
916	INTERMEDIATE FILAMENT CYTOSKELETON ORGANIZATION%GOBP%GO:0045104	29	0.325465	1.163	0.210682	0.468977	1	921
917	REGULATION OF STEM CELL DIFFERENTIATION%GOBP%GO:2000736	66	0.273144	1.16162	0.171548	0.471636	1	2062
918	CELL CYCLE CHECKPOINTS%REACTOME%R-HSA-69620.2	171	0.234701	1.16142	0.135714	0.471602	1	2070
919	REGULATION OF CELL CYCLE PROCESS%GOBP%GO:0010564	310	0.219228	1.16122	0.0869565	0.471579	1	1711
920	REGULATION OF CELL DIVISION%GOBP%GO:0051302	41	0.301629	1.1606	0.190476	0.472455	1	1285
921	INTERLEUKIN-1 SIGNALING%REACTOME DATABASE ID RELEASE 75%9020702	72	0.264356	1.15857	0.176211	0.476679	1	2187
922	HALLMARK_PI3K_AKT_MTOR_SIGNALING%MSIGDB_C2%HALLMARK_PI3K_AKT_MTOR_SIGNALING	61	0.278485	1.15831	0.190283	0.476755	1	1664
923	MAINTENANCE OF PROTEIN LOCATION IN CELL%GOBP%GO:0032507	27	0.331176	1.15776	0.250689	0.477446	1	1857
924	PID_IL12_2PATHWAY%MSIGDB_C2%PID_IL12_2PATHWAY	22	0.342855	1.15716	0.239554	0.478216	1	2500
925	REGULATION OF DNA-BINDING TRANSCRIPTION FACTOR ACTIVITY%GOBP%GO:0051090	150	0.238012	1.15663	0.0769231	0.478984	1	1544
926	REGULATION OF VIRAL GENOME REPLICATION%GOBP%GO:0045069	46	0.296469	1.15582	0.232143	0.48029	1	925
927	NUCLEOTIDE-BINDING DOMAIN, LEUCINE RICH REPEAT CONTAINING RECEPTOR SIGNALING PATHWAY%GOBP%GO:0035872	15	0.402964	1.15549	0.250639	0.480595	1	882
928	ANTIGEN ACTIVATES B CELL RECEPTOR (BCR) LEADING TO GENERATION OF SECOND MESSENGERS%REACTOME DATABASE ID RELEASE 75%983695	15	0.400404	1.15476	0.292011	0.481828	1	445
929	CILIOPATHIES%WIKIPATHWAYS_20210210%WP4803%HOMO SAPIENS	31	0.317877	1.15468	0.238532	0.481465	1	983
930	RESPONSE TO EPIDERMAL GROWTH FACTOR%GOBP%GO:0070849	18	0.375532	1.15444	0.228986	0.481554	1	2184
931	NEGATIVE REGULATION OF PHOSPHATE METABOLIC PROCESS%GOBP%GO:0045936	198	0.230361	1.15404	0.0820895	0.481903	1	1566
932	3Q29 COPY NUMBER VARIATION SYNDROME%WIKIPATHWAYS_20210210%WP4906%HOMO SAPIENS	31	0.325506	1.15376	0.201835	0.48209	1	604
933	INTEGRIN SIGNALLING PATHWAY%PANTHER PATHWAY%P00034	127	0.243547	1.15337	0.143678	0.482492	1	1034
934	REGULATION OF CELL-SUBSTRATE JUNCTION ASSEMBLY%GOBP%GO:0090109	39	0.302158	1.15307	0.205479	0.482739	1	1224
935	REGULATION OF STRESS FIBER ASSEMBLY%GOBP%GO:0051492	47	0.29138	1.15206	0.192593	0.48465	1	1539
936	DNA REPAIR%REACTOME%R-HSA-73894.3	149	0.242592	1.15188	0.136054	0.48454	1	1627
937	G-PROTEIN MEDIATED EVENTS%REACTOME%R-HSA-112040.1	37	0.308267	1.15163	0.244582	0.484576	1	774
938	NECTIN ADHESION PATHWAY%PATHWAY INTERACTION DATABASE NCI-NATURE CURATED DATA%NECTIN ADHESION PATHWAY	28	0.325552	1.15069	0.227528	0.486442	1	2382
939	BIOCARTA_CXCR4_PATHWAY%MSIGDB_C2%BIOCARTA_CXCR4_PATHWAY	16	0.390615	1.15065	0.274869	0.486028	1	1333
940	BASE-EXCISION REPAIR%GOBP%GO:0006284	26	0.327099	1.1504	0.232416	0.486095	1	1803
941	INSULIN RECEPTOR RECYCLING%REACTOME%R-HSA-77387.3	19	0.372501	1.15032	0.27439	0.485788	1	2440
942	IL2%NETPATH%IL2	46	0.297524	1.14938	0.211268	0.487621	1	1412
943	RESISTIN AS A REGULATOR OF INFLAMMATION%WIKIPATHWAYS_20210210%WP4481%HOMO SAPIENS	22	0.348862	1.14883	0.244186	0.488383	1	1529
944	OSTEOPONTIN-MEDIATED EVENTS%PATHWAY INTERACTION DATABASE NCI-NATURE CURATED DATA%OSTEOPONTIN-MEDIATED EVENTS	23	0.341104	1.14847	0.242424	0.488768	1	2406
945	MODULATION BY SYMBIONT OF HOST CELLULAR PROCESS%GOBP%GO:0044068	19	0.368669	1.14788	0.265928	0.489686	1	957
946	REGULATION OF PROTEIN IMPORT INTO NUCLEUS%GOBP%GO:0042306	22	0.349616	1.14783	0.212209	0.489262	1	1045
947	EYE MORPHOGENESIS%GOBP%GO:0048592	31	0.321227	1.14759	0.243902	0.489328	1	326
948	CELL PART MORPHOGENESIS%GOBP%GO:0032990	212	0.227198	1.14751	0.09	0.488991	1	790
949	POSITIVE REGULATION OF TRANSPORT%GOBP%GO:0051050	365	0.216074	1.14739	0.03125	0.488773	1	1792
950	DNA DAMAGE RESPONSE, DETECTION OF DNA DAMAGE%GOBP%GO:0042769	24	0.34705	1.14696	0.259375	0.48924	1	1785
951	POSITIVE REGULATION OF CATABOLIC PROCESS%GOBP%GO:0009896	187	0.229182	1.14691	0.121951	0.488856	1	1311
952	NEGATIVE REGULATION OF STRESS-ACTIVATED PROTEIN KINASE SIGNALING CASCADE%GOBP%GO:0070303	16	0.399639	1.14684	0.263014	0.488487	1	794
953	NEGATIVE REGULATION OF CYTOKINE-MEDIATED SIGNALING PATHWAY%GOBP%GO:0001960	23	0.348236	1.14651	0.253561	0.488804	1	1328
954	FACTORS AND PATHWAYS AFFECTING INSULIN-LIKE GROWTH FACTOR (IGF1)-AKT SIGNALING%WIKIPATHWAYS_20210210%WP3850%HOMO SAPIENS	19	0.375594	1.14632	0.256684	0.48873	1	502
955	INTERMEDIATE FILAMENT-BASED PROCESS%GOBP%GO:0045103	29	0.325465	1.14613	0.262821	0.488644	1	921
956	NEGATIVE REGULATION OF RESPONSE TO DNA DAMAGE STIMULUS%GOBP%GO:2001021	30	0.326191	1.14437	0.248428	0.492381	1	1373
957	POST-CHAPERONIN TUBULIN FOLDING PATHWAY%REACTOME DATABASE ID RELEASE 75%389977	20	0.361109	1.1443	0.226415	0.492052	1	563
958	RNA STABILIZATION%GOBP%GO:0043489	25	0.33299	1.14332	0.265823	0.493878	1	2415
959	FOXO-MEDIATED TRANSCRIPTION%REACTOME%R-HSA-9614085.2	24	0.334527	1.14259	0.241888	0.495053	1	1828
960	STRESS-ACTIVATED MAPK CASCADE%GOBP%GO:0051403	36	0.312863	1.14248	0.224422	0.494801	1	341
961	TRNA-CONTAINING RIBONUCLEOPROTEIN COMPLEX EXPORT FROM NUCLEUS%GOBP%GO:0071431	30	0.327848	1.14185	0.229885	0.495844	1	1460
962	NEGATIVE REGULATION OF CELL MOTILITY%GOBP%GO:2000146	120	0.239961	1.14136	0.154286	0.49651	1	1308
963	RESPONSE OF MTB TO PHAGOCYTOSIS%REACTOME DATABASE ID RELEASE 75%9637690	20	0.362572	1.1412	0.243478	0.496396	1	2378
964	REGULATION OF AUTOPHAGY%GOBP%GO:0010506	150	0.235731	1.14079	0.107692	0.496821	1	1792
965	SIGNAL TRANSDUCTION INVOLVED IN CELL CYCLE CHECKPOINT%GOBP%GO:0072395	30	0.319864	1.14076	0.250794	0.496404	1	1316
966	REGULATION OF CELL MIGRATION%GOBP%GO:0030334	401	0.209225	1.14065	0.0243902	0.496137	1	1280
967	MITOTIC METAPHASE AND ANAPHASE%REACTOME%R-HSA-2555396.2	169	0.230252	1.14037	0.132812	0.496369	1	2070
968	REGULATION OF CELLULAR COMPONENT MOVEMENT%GOBP%GO:0051270	452	0.209474	1.14029	0.030303	0.496028	1	1280
969	REGULATION OF GENE EXPRESSION, EPIGENETIC%GOBP%GO:0040029	114	0.242104	1.14025	0.152174	0.495611	1	1303
970	GLUTATHIONE METABOLISM%WIKIPATHWAYS_20210210%WP100%HOMO SAPIENS	19	0.362039	1.14021	0.253406	0.495224	1	1758
971	RIBOSOMAL LARGE SUBUNIT BIOGENESIS%GOBP%GO:0042273	49	0.288004	1.14003	0.238255	0.495179	1	1651
972	BIOCARTA_PDGF_PATHWAY%MSIGDB_C2%BIOCARTA_PDGF_PATHWAY	21	0.349732	1.1397	0.260163	0.495361	1	1034
973	HALLMARK_ESTROGEN_RESPONSE_EARLY%MSIGDB_C2%HALLMARK_ESTROGEN_RESPONSE_EARLY	86	0.256599	1.13888	0.19697	0.49687	1	1287
974	REGULATION OF CELL MOTILITY%GOBP%GO:2000145	423	0.212821	1.13842	0.0697674	0.497422	1	1280
975	MITOTIC ANAPHASE%REACTOME DATABASE ID RELEASE 75%68882	169	0.230252	1.13826	0.110345	0.497332	1	2070
976	DNA SYNTHESIS INVOLVED IN DNA REPAIR%GOBP%GO:0000731	24	0.334521	1.138	0.253165	0.497433	1	1606
977	VIRAL MESSENGER RNA SYNTHESIS%REACTOME DATABASE ID RELEASE 75%168325	35	0.310251	1.13783	0.266892	0.497308	1	1323
978	MRNA CLEAVAGE%GOBP%GO:0006379	16	0.382763	1.13772	0.266667	0.497058	1	2344
979	NEGATIVE REGULATION OF PEPTIDYL-TYROSINE PHOSPHORYLATION%GOBP%GO:0050732	20	0.362744	1.13749	0.263006	0.497133	1	705
980	CXCR4-MEDIATED SIGNALING EVENTS%PATHWAY INTERACTION DATABASE NCI-NATURE CURATED DATA%CXCR4-MEDIATED SIGNALING EVENTS	62	0.273713	1.13538	0.186312	0.50184	1	1016
981	REGULATION OF GLUCOSE TRANSMEMBRANE TRANSPORT%GOBP%GO:0010827	24	0.342797	1.13522	0.277612	0.501718	1	155
982	BETA1 ADRENERGIC RECEPTOR SIGNALING PATHWAY%PANTHER PATHWAY%P04377	20	0.353171	1.134	0.25	0.504167	1	1569
983	NEGATIVE REGULATION OF DEPHOSPHORYLATION%GOBP%GO:0035305	35	0.315936	1.13355	0.226537	0.504838	1	763
984	REGULATION OF CATABOLIC PROCESS%GOBP%GO:0009894	485	0.203327	1.13354	0.0333333	0.504352	1	1779
985	COREGULATION OF ANDROGEN RECEPTOR ACTIVITY%PATHWAY INTERACTION DATABASE NCI-NATURE CURATED DATA%COREGULATION OF ANDROGEN RECEPTOR ACTIVITY	34	0.307481	1.13323	0.246914	0.50455	1	1715
986	ANTIBACTERIAL HUMORAL RESPONSE%GOBP%GO:0019731	23	0.35383	1.13305	0.251462	0.504445	1	1237
987	IL4-MEDIATED SIGNALING EVENTS%PATHWAY INTERACTION DATABASE NCI-NATURE CURATED DATA%IL4-MEDIATED SIGNALING EVENTS	29	0.319252	1.13198	0.271642	0.506511	1	1528
988	PHOSPHATIDYLINOSITOL BIOSYNTHETIC PROCESS%GOBP%GO:0006661	47	0.287852	1.13174	0.246479	0.506577	1	588
989	PLASMA MEMBRANE BOUNDED CELL PROJECTION ORGANIZATION%GOBP%GO:0120036	410	0.204462	1.13171	0.025641	0.506132	1	1291
990	POSITIVE REGULATION OF ESTABLISHMENT OF PROTEIN LOCALIZATION%GOBP%GO:1904951	149	0.235901	1.13145	0.1625	0.506294	1	1407
991	NEGATIVE REGULATION OF VIRAL PROCESS%GOBP%GO:0048525	44	0.295772	1.13134	0.234899	0.506045	1	1839
992	GOLGI VESICLE TRANSPORT%GOBP%GO:0048193	270	0.221447	1.13014	0.12	0.508545	1	1736
993	PREFOLDIN MEDIATED TRANSFER OF SUBSTRATE TO CCT TRIC%REACTOME%R-HSA-389957.2	25	0.333117	1.12969	0.247761	0.509153	1	311
994	POTASSIUM ION IMPORT%GOBP%GO:0010107	15	0.390854	1.1291	0.28133	0.51011	1	1668
995	REGULATION OF CYTOKINE-MEDIATED SIGNALING PATHWAY%GOBP%GO:0001959	58	0.273724	1.1289	0.196911	0.510092	1	1098
996	EPHRIN SIGNALING%REACTOME DATABASE ID RELEASE 75%3928664	16	0.384511	1.12852	0.296296	0.510499	1	1613
997	MAJOR PATHWAY OF RRNA PROCESSING IN THE NUCLEOLUS AND CYTOSOL%REACTOME%R-HSA-6791226.3	150	0.233285	1.12829	0.156463	0.510573	1	853
998	INTERLEUKIN SIGNALING PATHWAY%PANTHER PATHWAY%P00036	28	0.32729	1.12822	0.262687	0.51024	1	2437
999	CD28 CO-STIMULATION%REACTOME DATABASE ID RELEASE 75%389356	16	0.378818	1.12814	0.269634	0.509935	1	96
1000	NEPHRIN FAMILY INTERACTIONS%REACTOME DATABASE ID RELEASE 75%373753	16	0.369138	1.12773	0.259669	0.510381	1	445
1001	CELLULAR PROTEIN-CONTAINING COMPLEX ASSEMBLY%GOBP%GO:0034622	456	0.20686	1.12683	0.0930233	0.512115	1	1790
1002	NEGATIVE REGULATION OF VIRAL GENOME REPLICATION%GOBP%GO:0045071	24	0.342322	1.12674	0.271739	0.51181	1	1227
1003	RETROGRADE TRANSPORT AT THE TRANS-GOLGI-NETWORK%REACTOME%R-HSA-6811440.1	33	0.312751	1.12615	0.260188	0.512804	1	1720
1004	FAS%IOB%FAS	84	0.254313	1.12603	0.225225	0.512569	1	1359
1005	SMALL GTPASE MEDIATED SIGNAL TRANSDUCTION%GOBP%GO:0007264	99	0.250339	1.12307	0.212264	0.519424	1	1002
1006	REGULATION OF DNA REPAIR%GOBP%GO:0006282	47	0.286263	1.12226	0.236934	0.520936	1	1803
1007	HALLMARK_MITOTIC_SPINDLE%MSIGDB_C2%HALLMARK_MITOTIC_SPINDLE	128	0.232524	1.12135	0.182927	0.522671	1	1857
1008	SPINDLE LOCALIZATION%GOBP%GO:0051653	25	0.331045	1.12012	0.27003	0.525265	1	1978
1009	NEGATIVE REGULATION OF PROTEIN TRANSPORT%GOBP%GO:0051224	32	0.313829	1.1192	0.278592	0.527037	1	1300
1010	REGULATION OF SIGNAL TRANSDUCTION BY P53 CLASS MEDIATOR%GOBP%GO:1901796	85	0.25149	1.11898	0.198953	0.527051	1	1839
1011	NEGATIVE REGULATION OF G2/M TRANSITION OF MITOTIC CELL CYCLE%GOBP%GO:0010972	61	0.266984	1.11831	0.23221	0.52822	1	2062
1012	TCF DEPENDENT SIGNALING IN RESPONSE TO WNT%REACTOME%R-HSA-201681.1	116	0.240845	1.11816	0.175439	0.528071	1	2169
1013	CELLULAR COMPONENT MORPHOGENESIS%GOBP%GO:0032989	303	0.21424	1.11747	0.132353	0.529301	1	799
1014	VALIDATED NUCLEAR ESTROGEN RECEPTOR ALPHA NETWORK%PATHWAY INTERACTION DATABASE NCI-NATURE CURATED DATA%VALIDATED NUCLEAR ESTROGEN RECEPTOR ALPHA NETWORK	23	0.344684	1.11582	0.275542	0.532936	1	1786
1015	PROTEIN MONOUBIQUITINATION%GOBP%GO:0006513	26	0.327149	1.11566	0.268222	0.532806	1	1617
1016	NUCLEAR-TRANSCRIBED MRNA CATABOLIC PROCESS%GOBP%GO:0000956	151	0.226847	1.11564	0.191489	0.532347	1	2399
1017	POSITIVE REGULATION OF VIRAL TRANSCRIPTION%GOBP%GO:0050434	28	0.319867	1.11507	0.271709	0.533346	1	1352
1018	POSITIVE REGULATION OF SECRETION%GOBP%GO:0051047	101	0.237975	1.11491	0.19797	0.533258	1	1779
1019	MUSCLE CELL DIFFERENTIATION%GOBP%GO:0042692	51	0.274474	1.11479	0.253731	0.533029	1	1556
1020	REGULATION OF CALCIUM-MEDIATED SIGNALING%GOBP%GO:0050848	33	0.306497	1.11444	0.273885	0.533446	1	1602
1021	MIRNA REGULATION OF DNA DAMAGE RESPONSE%WIKIPATHWAYS_20210210%WP1530%HOMO SAPIENS	32	0.30852	1.11422	0.278125	0.533483	1	1767
1022	POTASSIUM ION IMPORT ACROSS PLASMA MEMBRANE%GOBP%GO:1990573	15	0.390854	1.11414	0.295699	0.53315	1	1668
1023	NEGATIVE REGULATION OF GENE EXPRESSION, EPIGENETIC%GOBP%GO:0045814	41	0.291492	1.11399	0.261438	0.533026	1	2043
1024	REGULATION OF MITOTIC CELL CYCLE%GOBP%GO:0007346	266	0.213548	1.11376	0.114286	0.533094	1	1711
1025	REGULATION OF CDC42 ACTIVITY%PATHWAY INTERACTION DATABASE NCI-NATURE CURATED DATA%REGULATION OF CDC42 ACTIVITY	18	0.366232	1.1137	0.305764	0.532692	1	2331
1026	POSITIVE REGULATION OF ION TRANSMEMBRANE TRANSPORT%GOBP%GO:0034767	52	0.275142	1.11306	0.254682	0.533889	1	1893
1027	PID_ECADHERIN_STABILIZATION_PATHWAY%MSIGDB_C2%PID_ECADHERIN_STABILIZATION_PATHWAY	34	0.293805	1.11283	0.275362	0.533972	1	2393
1028	CELLULAR RESPONSE TO STARVATION%GOBP%GO:0009267	71	0.255719	1.11248	0.242063	0.534362	1	1620
1029	NEGATIVE REGULATION OF LOCOMOTION%GOBP%GO:0040013	143	0.230177	1.11175	0.184713	0.535647	1	1356
1030	PROTEIN POLYMERIZATION%GOBP%GO:0051258	55	0.267827	1.11173	0.203846	0.535184	1	1068
1031	RNA POLYADENYLATION%GOBP%GO:0043631	16	0.366984	1.1113	0.30203	0.535753	1	1916
1032	REGULATION OF SMALL GTPASE MEDIATED SIGNAL TRANSDUCTION%GOBP%GO:0051056	109	0.239495	1.11107	0.18408	0.53584	1	1513
1033	CELL PROJECTION ORGANIZATION%GOBP%GO:0030030	417	0.201386	1.11016	0.0652174	0.537634	1	1247
1034	REGULATION OF EXTRACELLULAR MATRIX ORGANIZATION%GOBP%GO:1903053	26	0.320941	1.10895	0.285285	0.540199	1	1224
1035	PI3K AKT SIGNALING IN CANCER%REACTOME%R-HSA-2219528.2	29	0.31862	1.10894	0.291536	0.539699	1	502
1036	INTERLEUKIN-1-MEDIATED SIGNALING PATHWAY%GOBP%GO:0070498	66	0.263142	1.10865	0.238095	0.53995	1	2187
1037	POSITIVE REGULATION OF CELLULAR CATABOLIC PROCESS%GOBP%GO:0031331	163	0.224933	1.10861	0.186992	0.539495	1	1376
1038	TRNA TRANSPORT%GOBP%GO:0051031	31	0.311741	1.10762	0.255738	0.541484	1	1460
1039	DNA DAMAGE RESPONSE%WIKIPATHWAYS_20210210%WP707%HOMO SAPIENS	31	0.310736	1.10729	0.275862	0.54181	1	1587
1040	PID_CDC42_REG_PATHWAY%MSIGDB_C2%PID_CDC42_REG_PATHWAY	18	0.366232	1.10724	0.289552	0.541424	1	2331
1041	FCERI MEDIATED MAPK ACTIVATION%REACTOME DATABASE ID RELEASE 75%2871796	18	0.35801	1.10637	0.306011	0.543096	1	1033
1042	NEGATIVE REGULATION OF RNA METABOLIC PROCESS%GOBP%GO:0051253	324	0.204375	1.10629	0.0967742	0.542796	1	1552
1043	REGULATION OF ACTOMYOSIN STRUCTURE ORGANIZATION%GOBP%GO:0110020	49	0.281657	1.10602	0.262626	0.542994	1	1539
1044	REGULATION OF CARDIAC MUSCLE HYPERTROPHY%GOBP%GO:0010611	18	0.363148	1.10573	0.305785	0.543266	1	1764
1045	NUCLEAR IMPORT OF REV PROTEIN%REACTOME DATABASE ID RELEASE 75%180746	27	0.325471	1.10565	0.263314	0.542957	1	1178
1046	SIGNALING BY NOTCH1 HD+PEST DOMAIN MUTANTS IN CANCER%REACTOME DATABASE ID RELEASE 75%2894858	21	0.339283	1.1051	0.301887	0.543836	1	1617
1047	NEURON DEVELOPMENT%GOBP%GO:0048666	291	0.213389	1.10488	0.09375	0.543882	1	991
1048	MATURATION OF SSU-RRNA FROM TRICISTRONIC RRNA TRANSCRIPT (SSU-RRNA, 5.8S RRNA, LSU-RRNA)%GOBP%GO:0000462	18	0.361404	1.10424	0.337875	0.54496	1	378
1049	NEGATIVE REGULATION OF NUCLEOBASE-CONTAINING COMPOUND METABOLIC PROCESS%GOBP%GO:0045934	377	0.20718	1.1036	0.0666667	0.546065	1	1552
1050	INTRA-GOLGI AND RETROGRADE GOLGI-TO-ER TRAFFIC%REACTOME%R-HSA-6811442.1	127	0.231188	1.10349	0.17801	0.545852	1	1849
1051	PROTEIN-CONTAINING COMPLEX LOCALIZATION%GOBP%GO:0031503	134	0.230603	1.10331	0.206452	0.545851	1	2060
1052	BIOCARTA_IGF1R_PATHWAY%MSIGDB_C2%BIOCARTA_IGF1R_PATHWAY	17	0.363689	1.1024	0.326648	0.547781	1	449
1053	CONSTITUTIVE SIGNALING BY NOTCH1 PEST DOMAIN MUTANTS%REACTOME DATABASE ID RELEASE 75%2644606	21	0.339283	1.10203	0.301408	0.548243	1	1617
1054	CELL CYCLE%WIKIPATHWAYS_20210210%WP179%HOMO SAPIENS	55	0.271874	1.10089	0.264822	0.55059	1	1817
1055	TSLP%NETPATH%TSLP	112	0.241529	1.10069	0.219653	0.550584	1	1373
1056	GENES RELATED TO PRIMARY CILIUM DEVELOPMENT (BASED ON CRISPR)%WIKIPATHWAYS_20210210%WP4536%HOMO SAPIENS	16	0.359731	1.10013	0.334165	0.551606	1	2225
1057	PID_ER_NONGENOMIC_PATHWAY%MSIGDB_C2%PID_ER_NONGENOMIC_PATHWAY	33	0.299861	1.10005	0.288079	0.551275	1	236
1058	SIGNALING BY NOTCH1 IN CANCER%REACTOME%R-HSA-2644603.2	21	0.339283	1.09993	0.3219	0.551069	1	1617
1059	DEFENSE RESPONSE TO OTHER ORGANISM%GOBP%GO:0098542	132	0.231804	1.09988	0.216346	0.550672	1	1242
1060	DAP12 INTERACTIONS%REACTOME%R-HSA-2172127.1	20	0.342232	1.09947	0.292537	0.551228	1	272
1061	REGULATION OF RESPONSE TO CYTOKINE STIMULUS%GOBP%GO:0060759	62	0.262941	1.09819	0.229508	0.554122	1	1098
1062	CELL MORPHOGENESIS INVOLVED IN DIFFERENTIATION%GOBP%GO:0000904	224	0.214769	1.09813	0.156863	0.553776	1	799
1063	REGULATION OF MUSCLE HYPERTROPHY%GOBP%GO:0014743	18	0.363148	1.09795	0.318841	0.553732	1	1764
1064	REGULATION OF TRANSFERASE ACTIVITY%GOBP%GO:0051338	363	0.203574	1.09787	0.127273	0.553383	1	1068
1065	TELOMERE MAINTENANCE%REACTOME DATABASE ID RELEASE 75%157579	67	0.254636	1.09736	0.251029	0.554107	1	1718
1066	RESOLUTION OF SISTER CHROMATID COHESION%REACTOME%R-HSA-2500257.1	63	0.257793	1.09712	0.25	0.554168	1	2070
1067	REGULATION OF KINASE ACTIVITY%GOBP%GO:0043549	312	0.208983	1.09642	0.2	0.555427	1	1034
1068	CONSTITUTIVE SIGNALING BY NOTCH1 HD+PEST DOMAIN MUTANTS%REACTOME DATABASE ID RELEASE 75%2894862	21	0.339283	1.09556	0.319444	0.557182	1	1617
1069	ECTODERM DIFFERENTIATION%WIKIPATHWAYS_20210210%WP2858%HOMO SAPIENS	49	0.274682	1.09537	0.276119	0.557136	1	1268
1070	REGULATION OF CELLULAR COMPONENT SIZE%GOBP%GO:0032535	168	0.222349	1.09481	0.169355	0.558006	1	1728
1071	NEGATIVE REGULATION OF ESTABLISHMENT OF PROTEIN LOCALIZATION%GOBP%GO:1904950	34	0.300244	1.09454	0.303797	0.558257	1	1300
1072	MEMBRANE ORGANIZATION%GOBP%GO:0061024	454	0.196941	1.09429	0	0.558374	1	1316
1073	RAB GEFS EXCHANGE GTP FOR GDP ON RABS%REACTOME%R-HSA-8876198.3	47	0.274554	1.09362	0.267123	0.559623	1	2679
1074	TRAF6 MEDIATED NF-KB ACTIVATION%REACTOME DATABASE ID RELEASE 75%933542	15	0.371346	1.09311	0.341207	0.560416	1	1597
1075	CELL-SUBSTRATE ADHESION%GOBP%GO:0031589	96	0.234178	1.0923	0.25	0.562148	1	606
1076	REGULATION OF CELL-SUBSTRATE ADHESION%GOBP%GO:0010810	114	0.235284	1.09191	0.252941	0.562578	1	1224
1077	RNA PHOSPHODIESTER BOND HYDROLYSIS, ENDONUCLEOLYTIC%GOBP%GO:0090502	15	0.373129	1.09148	0.339726	0.563209	1	1401
1078	NEURON PROJECTION GUIDANCE%GOBP%GO:0097485	121	0.227334	1.09109	0.225989	0.563731	1	991
1079	DNA BIOSYNTHETIC PROCESS%GOBP%GO:0071897	45	0.277007	1.09061	0.295203	0.564483	1	1606
1080	NEGATIVE REGULATION OF MOLECULAR FUNCTION%GOBP%GO:0044092	362	0.205201	1.09031	0.181818	0.564799	1	1789
1081	RUNX1 REGULATES TRANSCRIPTION OF GENES INVOLVED IN DIFFERENTIATION OF HSCS%REACTOME DATABASE ID RELEASE 75%8939236	78	0.248378	1.08664	0.287736	0.57417	1	2160
1082	MRNA POLYADENYLATION%GOBP%GO:0006378	16	0.366984	1.08656	0.319209	0.573878	1	1916
1083	REGULATION OF CELLULAR RESPONSE TO STRESS%GOBP%GO:0080135	301	0.203111	1.08611	0.119048	0.574612	1	1412
1084	BIOCARTA_G1_PATHWAY%MSIGDB_C2%BIOCARTA_G1_PATHWAY	15	0.374468	1.08575	0.310627	0.575035	1	1764
1085	TUMOR SUPPRESSOR ACTIVITY OF SMARCB1%WIKIPATHWAYS_20210210%WP4204%HOMO SAPIENS	19	0.351097	1.08535	0.29096	0.575556	1	986
1086	REGULATION OF TELOMERE MAINTENANCE%GOBP%GO:0032204	40	0.290698	1.08533	0.303125	0.57507	1	575
1087	EML4 AND NUDC IN MITOTIC SPINDLE FORMATION%REACTOME%R-HSA-9648025.2	57	0.266044	1.08523	0.283019	0.574828	1	2070
1088	ACTIVATED NOTCH1 TRANSMITS SIGNAL TO THE NUCLEUS%REACTOME%R-HSA-2122948.3	16	0.369249	1.08499	0.337766	0.574966	1	1280
1089	SIGNALING BY RHO GTPASES%REACTOME DATABASE ID RELEASE 75%194315	238	0.212972	1.08375	0.228261	0.577698	1	1285
1090	REGULATION OF PTEN STABILITY AND ACTIVITY%REACTOME%R-HSA-8948751.1	56	0.263019	1.08281	0.290541	0.579629	1	2160
1091	POSITIVE REGULATION OF DNA-BINDING TRANSCRIPTION FACTOR ACTIVITY%GOBP%GO:0051091	101	0.237241	1.0827	0.26738	0.57941	1	1356
1092	CLEC7A (DECTIN-1) SIGNALING%REACTOME DATABASE ID RELEASE 75%5607764	76	0.245014	1.08257	0.255924	0.579236	1	2567
1093	REGULATION OF EPITHELIAL TO MESENCHYMAL TRANSITION%GOBP%GO:0010717	39	0.280667	1.08089	0.309446	0.583142	1	1238
1094	FBXL10 ENHANCEMENT OF MAP/ERK SIGNALING IN DIFFUSE LARGE B-CELL LYMPHOMA%WIKIPATHWAYS_20210210%WP4553%HOMO SAPIENS	15	0.365095	1.08083	0.322493	0.582783	1	2184
1095	DEGRADATION OF BETA-CATENIN BY THE DESTRUCTION COMPLEX%REACTOME DATABASE ID RELEASE 75%195253	64	0.257585	1.08068	0.272374	0.58265	1	2169
1096	POSITIVE REGULATION OF NF-KAPPAB TRANSCRIPTION FACTOR ACTIVITY%GOBP%GO:0051092	69	0.25833	1.08008	0.292035	0.583754	1	1650
1097	ONCOSTATIN M SIGNALING PATHWAY%WIKIPATHWAYS_20210210%WP2374%HOMO SAPIENS	45	0.276758	1.07879	0.281955	0.586697	1	1333
1098	5HT4 TYPE RECEPTOR MEDIATED SIGNALING PATHWAY%PANTHER PATHWAY%P04376	16	0.358959	1.07774	0.346883	0.588976	1	1569
1099	UB-SPECIFIC PROCESSING PROTEASES%REACTOME DATABASE ID RELEASE 75%5689880	115	0.226905	1.07765	0.25641	0.588712	1	1778
1100	POSITIVE REGULATION OF ION TRANSPORT%GOBP%GO:0043270	89	0.24112	1.07632	0.280952	0.591824	1	1789
1101	T-CELL ANTIGEN RECEPTOR (TCR) PATHWAY DURING STAPHYLOCOCCUS AUREUS INFECTION%WIKIPATHWAYS_20210210%WP3863%HOMO SAPIENS	34	0.289439	1.07601	0.318033	0.592117	1	1333
1102	SHP2 SIGNALING%PATHWAY INTERACTION DATABASE NCI-NATURE CURATED DATA%SHP2 SIGNALING	33	0.290398	1.07557	0.3125	0.592866	1	379
1103	CELLULAR HOMEOSTASIS%GOBP%GO:0019725	274	0.202347	1.07543	0.170732	0.592683	1	1668
1104	REGULATION OF TP53 ACTIVITY%REACTOME%R-HSA-5633007.3	69	0.2538	1.07537	0.299213	0.592284	1	1828
1105	POSITIVE REGULATION OF NUCLEOCYTOPLASMIC TRANSPORT%GOBP%GO:0046824	32	0.299594	1.07491	0.340625	0.593087	1	1408
1106	CELLULAR RESPONSES TO STRESS%REACTOME%R-HSA-2262752.6	372	0.199816	1.07466	0.183333	0.593235	1	2403
1107	NOTCH1 INTRACELLULAR DOMAIN REGULATES TRANSCRIPTION%REACTOME%R-HSA-2122947.3	15	0.370939	1.07396	0.350588	0.594659	1	1617
1108	AUTOPHAGOSOME ASSEMBLY%GOBP%GO:0000045	25	0.31826	1.07369	0.318471	0.594861	1	1956
1109	CELL MORPHOGENESIS INVOLVED IN NEURON DIFFERENTIATION%GOBP%GO:0048667	177	0.216088	1.07346	0.274074	0.594903	1	790
1110	LYMPHOCYTE MEDIATED IMMUNITY%GOBP%GO:0002449	34	0.29439	1.07272	0.326733	0.596463	1	1595
1111	TRANSCRIPTION, DNA-TEMPLATED%GOBP%GO:0006351	151	0.221076	1.07247	0.243902	0.596565	1	1530
1112	NEGATIVE REGULATION OF ORGANELLE ORGANIZATION%GOBP%GO:0010639	159	0.220353	1.07223	0.285714	0.5967	1	1764
1113	REGULATION OF VESICLE-MEDIATED TRANSPORT%GOBP%GO:0060627	252	0.211222	1.07135	0.2	0.598667	1	1300
1114	BIOCARTA_BIOPEPTIDES_PATHWAY%MSIGDB_C2%BIOCARTA_BIOPEPTIDES_PATHWAY	24	0.313565	1.07121	0.334395	0.598551	1	2184
1115	INFECTION WITH MYCOBACTERIUM TUBERCULOSIS%REACTOME DATABASE ID RELEASE 75%9635486	24	0.321912	1.07117	0.348214	0.598127	1	841
1116	SIGNALING BY NOTCH1 PEST DOMAIN MUTANTS IN CANCER%REACTOME%R-HSA-2644602.1	21	0.339283	1.07107	0.372159	0.597856	1	1617
1117	PID_SHP2_PATHWAY%MSIGDB_C2%PID_SHP2_PATHWAY	32	0.303339	1.0701	0.324841	0.599868	1	379
1118	AUTOPHAGOSOME ORGANIZATION%GOBP%GO:1905037	25	0.31826	1.07003	0.345404	0.599509	1	1956
1119	REGULATION OF SISTER CHROMATID SEGREGATION%GOBP%GO:0033045	39	0.281444	1.06966	0.326667	0.599959	1	1884
1120	PID_INTEGRIN_A4B1_PATHWAY%MSIGDB_C2%PID_INTEGRIN_A4B1_PATHWAY	29	0.304264	1.06919	0.322476	0.60077	1	2280
1121	DNA INTEGRITY CHECKPOINT%GOBP%GO:0031570	46	0.276335	1.06908	0.332117	0.600488	1	1342
1122	REGULATION OF CELLULAR CATABOLIC PROCESS%GOBP%GO:0031329	450	0.200162	1.069	0.0967742	0.600218	1	1779
1123	HDR THROUGH HOMOLOGOUS RECOMBINATION (HRR)%REACTOME%R-HSA-5685942.1	23	0.31775	1.06888	0.347594	0.599996	1	1342
1124	REGULATED NECROSIS%REACTOME%R-HSA-5218859.3	17	0.347264	1.06887	0.345345	0.599504	1	1543
1125	PID_BARD1_PATHWAY%MSIGDB_C2%PID_BARD1_PATHWAY	16	0.357026	1.06825	0.342175	0.600711	1	575
1126	REGULATION OF PROTEIN LOCALIZATION TO PLASMA MEMBRANE%GOBP%GO:1903076	57	0.257047	1.06773	0.3213	0.601602	1	1907
1127	CELLULAR RESPONSE TO DNA DAMAGE STIMULUS%GOBP%GO:0006974	268	0.202352	1.06751	0.214286	0.601644	1	1342
1128	NEUROGENESIS%GOBP%GO:0022008	482	0.193136	1.06732	0.131579	0.601652	1	1129
1129	AXON GUIDANCE%GOBP%GO:0007411	121	0.227334	1.06717	0.251282	0.601567	1	991
1130	REGULATION OF PROTEIN LOCALIZATION TO CELL PERIPHERY%GOBP%GO:1904375	66	0.255447	1.06625	0.3125	0.603447	1	1268
1131	REGULATION OF JUN KINASE ACTIVITY%GOBP%GO:0043506	22	0.319274	1.06578	0.353982	0.604193	1	1032
1132	NEP NS2 INTERACTS WITH THE CELLULAR EXPORT MACHINERY%REACTOME%R-HSA-168333.3	25	0.313224	1.06575	0.311377	0.603766	1	1112
1133	HALLMARK_E2F_TARGETS%MSIGDB_C2%HALLMARK_E2F_TARGETS	124	0.226222	1.06428	0.269939	0.607232	1	1836
1134	DOUBLE-STRAND BREAK REPAIR VIA HOMOLOGOUS RECOMBINATION%GOBP%GO:0000724	31	0.296217	1.06405	0.370057	0.607343	1	335
1135	NUCLEOTIDE EXCISION REPAIR%REACTOME%R-HSA-5696398.2	68	0.248345	1.06362	0.333333	0.60802	1	1803
1136	CELLULAR RESPONSES TO EXTERNAL STIMULI%REACTOME%R-HSA-8953897.4	375	0.196	1.06351	0.229167	0.607768	1	2403
1137	SYNAPSE ORGANIZATION%GOBP%GO:0050808	89	0.236306	1.06286	0.339367	0.60908	1	609
1138	INNATE IMMUNE RESPONSE%GOBP%GO:0045087	181	0.212157	1.06271	0.274074	0.608954	1	1356
1139	HALLMARK_HEDGEHOG_SIGNALING%MSIGDB_C2%HALLMARK_HEDGEHOG_SIGNALING	25	0.321224	1.06257	0.365625	0.608752	1	596
1140	PROTEIN MODIFICATION BY SMALL PROTEIN REMOVAL%GOBP%GO:0070646	125	0.219485	1.0625	0.254777	0.60838	1	1302
1141	GENERATION OF NEURONS%GOBP%GO:0048699	460	0.195217	1.06224	0.206897	0.608599	1	1129
1142	PI3K AKT SIGNALING%REACTOME%R-HSA-1257604.9	134	0.22455	1.06211	0.306818	0.608404	1	1291
1143	DOWNREGULATION OF ERBB2 SIGNALING%REACTOME%R-HSA-8863795.2	16	0.365453	1.06185	0.373057	0.608604	1	276
1144	RESPONSE TO STARVATION%GOBP%GO:0042594	76	0.244686	1.06105	0.32549	0.610345	1	1620
1145	REGULATION OF MULTI-ORGANISM PROCESS%GOBP%GO:0043900	192	0.211381	1.06089	0.306306	0.61028	1	1419
1146	ASPARTATE FAMILY AMINO ACID BIOSYNTHETIC PROCESS%GOBP%GO:0009067	16	0.363841	1.06025	0.339943	0.611539	1	1770
1147	RIPK1-MEDIATED REGULATED NECROSIS%REACTOME DATABASE ID RELEASE 75%5213460	17	0.347264	1.06005	0.347709	0.611578	1	1543
1148	NEGATIVE REGULATION OF HISTONE MODIFICATION%GOBP%GO:0031057	16	0.351654	1.05986	0.338843	0.611578	1	2171
1149	NEGATIVE REGULATION OF CELL MIGRATION%GOBP%GO:0030336	114	0.22523	1.0598	0.285714	0.61121	1	1308
1150	REGULATION OF MAP KINASE ACTIVITY%GOBP%GO:0043405	115	0.225599	1.05957	0.282486	0.611297	1	1034
1151	POSITIVE REGULATION OF SMALL GTPASE MEDIATED SIGNAL TRANSDUCTION%GOBP%GO:0051057	27	0.31601	1.05935	0.364943	0.61134	1	1501
1152	CELLULAR RESPONSE TO MECHANICAL STIMULUS%GOBP%GO:0071260	17	0.356539	1.05919	0.348703	0.611278	1	1501
1153	SUMOYLATION OF DNA DAMAGE RESPONSE AND REPAIR PROTEINS%REACTOME DATABASE ID RELEASE 75%3108214	46	0.269186	1.05874	0.3391	0.612018	1	1112
1154	BARD1 SIGNALING EVENTS%PATHWAY INTERACTION DATABASE NCI-NATURE CURATED DATA%BARD1 SIGNALING EVENTS	15	0.365031	1.05844	0.380952	0.612356	1	575
1155	REGULATION OF ACTIN FILAMENT BUNDLE ASSEMBLY%GOBP%GO:0032231	51	0.261567	1.05756	0.385892	0.614375	1	1602
1156	INTRACELLULAR SIGNALING BY SECOND MESSENGERS%REACTOME%R-HSA-9006925.3	159	0.216869	1.05676	0.325758	0.616046	1	1784
1157	PID_P73PATHWAY%MSIGDB_C2%PID_P73PATHWAY	39	0.277967	1.05614	0.397213	0.617195	1	1587
1158	MACROAUTOPHAGY%REACTOME%R-HSA-1632852.8	64	0.25153	1.05599	0.324324	0.617096	1	1140
1159	REGULATION OF PROTEIN KINASE ACTIVITY%GOBP%GO:0045859	269	0.20411	1.05527	0.273973	0.618584	1	1057
1160	ANIMAL ORGAN MORPHOGENESIS%GOBP%GO:0009887	188	0.208534	1.05502	0.242188	0.618719	1	1025
1161	METHIONINE METABOLIC PROCESS%GOBP%GO:0006555	17	0.350415	1.05343	0.36413	0.622636	1	1770
1162	CXCR3-MEDIATED SIGNALING EVENTS%PATHWAY INTERACTION DATABASE NCI-NATURE CURATED DATA%CXCR3-MEDIATED SIGNALING EVENTS	26	0.303796	1.05341	0.343108	0.622146	1	236
1163	JOUBERT SYNDROME%WIKIPATHWAYS_20210210%WP4656%HOMO SAPIENS	23	0.320189	1.05247	0.335312	0.624161	1	1671
1164	REGULATION OF LAMELLIPODIUM ORGANIZATION%GOBP%GO:1902743	33	0.29246	1.05157	0.361446	0.626138	1	113
1165	HALLMARK_TNFA_SIGNALING_VIA_NFKB%MSIGDB_C2%HALLMARK_TNFA_SIGNALING_VIA_NFKB	66	0.244224	1.05111	0.373077	0.626895	1	1608
1166	RECOMBINATIONAL REPAIR%GOBP%GO:0000725	31	0.296217	1.05081	0.348485	0.627166	1	335
1167	DNA-TEMPLATED TRANSCRIPTION, TERMINATION%GOBP%GO:0006353	37	0.280085	1.05051	0.342193	0.627433	1	1408
1168	PROTEIN-DNA COMPLEX ASSEMBLY%GOBP%GO:0065004	115	0.225621	1.05044	0.299401	0.627114	1	1808
1169	NEGATIVE REGULATION OF PHOSPHATASE ACTIVITY%GOBP%GO:0010923	31	0.295001	1.05043	0.367781	0.626597	1	763
1170	REGULATION OF RUNX2 EXPRESSION AND ACTIVITY%REACTOME%R-HSA-8939902.1	53	0.257662	1.0502	0.373702	0.626667	1	2160
1171	GAP-FILLING DNA REPAIR SYNTHESIS AND LIGATION IN TC-NER%REACTOME%R-HSA-6782210.1	44	0.269843	1.05006	0.319392	0.626517	1	1803
1172	IMPORT INTO NUCLEUS%GOBP%GO:0051170	59	0.253027	1.04997	0.359849	0.626301	1	1112
1173	WATER HOMEOSTASIS%GOBP%GO:0030104	31	0.29536	1.04954	0.371429	0.626941	1	1338
1174	AXON DEVELOPMENT%GOBP%GO:0061564	174	0.207586	1.04914	0.280303	0.627537	1	991
1175	NEGATIVE REGULATION OF PROTEIN METABOLIC PROCESS%GOBP%GO:0051248	428	0.192059	1.04898	0.175	0.62748	1	1601
1176	NEPHROTIC SYNDROME%WIKIPATHWAYS_20210210%WP4758%HOMO SAPIENS	26	0.30807	1.04875	0.341108	0.627648	1	1437
1177	REGULATION OF TP53 ACTIVITY THROUGH PHOSPHORYLATION%REACTOME DATABASE ID RELEASE 75%6804756	37	0.278131	1.04831	0.339869	0.628292	1	1792
1178	REGULATION OF CARBOHYDRATE CATABOLIC PROCESS%GOBP%GO:0043470	48	0.264627	1.04809	0.325175	0.628429	1	1605
1179	ESTABLISHMENT OF SPINDLE LOCALIZATION%GOBP%GO:0051293	24	0.311829	1.04762	0.398844	0.629345	1	1978
1180	INTRACELLULAR LIPID TRANSPORT%GOBP%GO:0032365	21	0.3244	1.0475	0.375723	0.629133	1	1023
1181	REGULATION OF NECROPTOTIC CELL DEATH%REACTOME%R-HSA-5675482.4	17	0.347264	1.04708	0.367876	0.629818	1	1543
1182	SENSORY ORGAN MORPHOGENESIS%GOBP%GO:0090596	43	0.27156	1.04674	0.352313	0.630239	1	1247
1183	DEGRADATION OF GLI1 BY THE PROTEASOME%REACTOME%R-HSA-5610780.1	53	0.260684	1.04521	0.33813	0.634089	1	2279
1184	M-CSF%IOB%M-CSF	49	0.258553	1.04505	0.362637	0.633989	1	1174
1185	CELL DEVELOPMENT%GOBP%GO:0048468	472	0.195711	1.04444	0.243902	0.635171	1	1291
1186	RAS PATHWAY%PANTHER PATHWAY%P04393	43	0.271609	1.04365	0.340741	0.636936	1	2496
1187	DOWNSTREAM SIGNAL TRANSDUCTION%REACTOME%R-HSA-186763.2	23	0.31664	1.04353	0.369318	0.636724	1	991
1188	P73 TRANSCRIPTION FACTOR NETWORK%PATHWAY INTERACTION DATABASE NCI-NATURE CURATED DATA%P73 TRANSCRIPTION FACTOR NETWORK	39	0.277967	1.04353	0.365517	0.636209	1	1587
1189	RHO GTPASE EFFECTORS%REACTOME%R-HSA-195258.4	189	0.210908	1.04258	0.300813	0.63835	1	1285
1190	MECP2 AND ASSOCIATED RETT SYNDROME%WIKIPATHWAYS_20210210%WP3584%HOMO SAPIENS	31	0.289009	1.04213	0.364217	0.63908	1	1795
1191	PERK REGULATES GENE EXPRESSION%REACTOME DATABASE ID RELEASE 75%381042	18	0.350405	1.04197	0.38209	0.638969	1	853
1192	REGULATION OF PTEN GENE TRANSCRIPTION%REACTOME%R-HSA-8943724.1	30	0.295506	1.04186	0.388889	0.638741	1	658
1193	POSITIVE REGULATION OF PROTEIN MODIFICATION PROCESS%GOBP%GO:0031401	425	0.189808	1.04137	0.228571	0.639534	1	1579
1194	BETA3 ADRENERGIC RECEPTOR SIGNALING PATHWAY%PANTHER PATHWAY%P04379	16	0.358959	1.04129	0.405836	0.639223	1	1569
1195	TRANSLATION INHIBITORS IN CHRONICALLY ACTIVATED PDGFRA CELLS%WIKIPATHWAYS_20210210%WP4566%HOMO SAPIENS	31	0.28292	1.04107	0.358025	0.639299	1	1174
1196	REGULATION OF VIRAL TRANSCRIPTION%GOBP%GO:0046782	37	0.280513	1.04089	0.363636	0.639299	1	1356
1197	POSITIVE REGULATION OF EXTRACELLULAR MATRIX ORGANIZATION%GOBP%GO:1903055	16	0.344457	1.03973	0.419718	0.642106	1	1224
1198	IMPORT INTO CELL%GOBP%GO:0098657	328	0.193612	1.03937	0.338983	0.642552	1	1273
1199	REGULATION OF PHAGOCYTOSIS%GOBP%GO:0050764	45	0.262556	1.03904	0.363014	0.642999	1	929
1200	SIGNAL TRANSDUCTION BY L1%REACTOME%R-HSA-445144.1	19	0.331045	1.03883	0.376963	0.643087	1	2184
1201	NUCLEIC ACID-TEMPLATED TRANSCRIPTION%GOBP%GO:0097659	152	0.213946	1.03845	0.295598	0.643605	1	1530
1202	PLASMA MEMBRANE ESTROGEN RECEPTOR SIGNALING%PATHWAY INTERACTION DATABASE NCI-NATURE CURATED DATA%PLASMA MEMBRANE ESTROGEN RECEPTOR SIGNALING	34	0.286522	1.03787	0.398734	0.644746	1	236
1203	POSITIVE REGULATION OF SECRETION BY CELL%GOBP%GO:1903532	94	0.231339	1.03784	0.351852	0.644281	1	1723
1204	NEGATIVE REGULATION OF TRANSCRIPTION, DNA-TEMPLATED%GOBP%GO:0045892	270	0.195538	1.03695	0.301075	0.646329	1	1548
1205	CELLULAR CHEMICAL HOMEOSTASIS%GOBP%GO:0055082	205	0.204264	1.03665	0.339806	0.646679	1	1668
1206	TELENCEPHALON DEVELOPMENT%GOBP%GO:0021537	43	0.274939	1.03616	0.380137	0.647582	1	1947
1207	SIGNALING EVENTS MEDIATED BY PTP1B%PATHWAY INTERACTION DATABASE NCI-NATURE CURATED DATA%SIGNALING EVENTS MEDIATED BY PTP1B	38	0.272393	1.03584	0.391753	0.648037	1	820
1208	HALLMARK_DNA_REPAIR%MSIGDB_C2%HALLMARK_DNA_REPAIR	93	0.229949	1.03534	0.342593	0.648894	1	607
1209	MODIFICATION OF MORPHOLOGY OR PHYSIOLOGY OF OTHER ORGANISM%GOBP%GO:0035821	89	0.230851	1.03488	0.351351	0.649623	1	1369
1210	INTRINSIC APOPTOTIC SIGNALING PATHWAY IN RESPONSE TO DNA DAMAGE%GOBP%GO:0008630	20	0.324209	1.03453	0.40176	0.65008	1	1285
1211	FLT3 SIGNALING IN DISEASE%REACTOME%R-HSA-9682385.1	17	0.333873	1.0341	0.374046	0.650813	1	767
1212	SIGNALING BY FGFR1 IN DISEASE%REACTOME%R-HSA-5655302.2	18	0.336584	1.03344	0.407311	0.652073	1	991
1213	NUCLEOTIDE-EXCISION REPAIR, DNA INCISION%GOBP%GO:0033683	22	0.310868	1.03338	0.378299	0.651715	1	1785
1214	EXPORT OF VIRAL RIBONUCLEOPROTEINS FROM NUCLEUS%REACTOME DATABASE ID RELEASE 75%168274	26	0.303844	1.03274	0.415663	0.652923	1	1112
1215	PID_TCR_PATHWAY%MSIGDB_C2%PID_TCR_PATHWAY	40	0.266755	1.03209	0.364865	0.654388	1	445
1216	REGULATION OF MRNA CATABOLIC PROCESS%GOBP%GO:0061013	135	0.214659	1.03119	0.364865	0.656378	1	2160
1217	DENDRITE DEVELOPMENT%GOBP%GO:0016358	30	0.292822	1.03118	0.421365	0.655857	1	578
1218	NOTCH%NETPATH%NOTCH	44	0.261669	1.03097	0.389313	0.655921	1	1617
1219	LEARNING%GOBP%GO:0007612	19	0.329379	1.03096	0.378453	0.655392	1	69
1220	RNA BIOSYNTHETIC PROCESS%GOBP%GO:0032774	154	0.208893	1.03023	0.392	0.656918	1	1530
1221	ORGANELLE FISSION%GOBP%GO:0048285	113	0.222994	1.0297	0.323353	0.657878	1	1255
1222	MAINTENANCE OF PROTEIN LOCALIZATION IN ORGANELLE%GOBP%GO:0072595	16	0.344693	1.02874	0.415344	0.66013	1	2148
1223	DOUBLE-STRAND BREAK REPAIR VIA NONHOMOLOGOUS END JOINING%GOBP%GO:0006303	29	0.296391	1.02861	0.381271	0.659974	1	1125
1224	ALPHA-SYNUCLEIN SIGNALING%PATHWAY INTERACTION DATABASE NCI-NATURE CURATED DATA%ALPHA-SYNUCLEIN SIGNALING	21	0.320357	1.02829	0.432665	0.660304	1	765
1225	NEGATIVE REGULATION OF DNA-BINDING TRANSCRIPTION FACTOR ACTIVITY%GOBP%GO:0043433	46	0.264767	1.02818	0.365385	0.660089	1	1199
1226	DNA DAMAGE CHECKPOINT%GOBP%GO:0000077	45	0.261946	1.02813	0.407273	0.6597	1	1342
1227	POSITIVE REGULATION OF GLUCOSE IMPORT%GOBP%GO:0046326	15	0.361988	1.02783	0.390957	0.660061	1	113
1228	REGULATION OF CHROMOSOME SEPARATION%GOBP%GO:1905818	34	0.280926	1.02771	0.41716	0.659889	1	1884
1229	REV-MEDIATED NUCLEAR EXPORT OF HIV RNA%REACTOME%R-HSA-165054.2	28	0.296607	1.0269	0.403509	0.661631	1	1178
1230	SIGNALING BY WNT IN CANCER%REACTOME DATABASE ID RELEASE 75%4791275	16	0.35013	1.02625	0.378238	0.663008	1	2169
1231	NEGATIVE REGULATION OF EXTRINSIC APOPTOTIC SIGNALING PATHWAY VIA DEATH DOMAIN RECEPTORS%GOBP%GO:1902042	21	0.306011	1.02616	0.392758	0.662736	1	1291
1232	SIGNALING BY TGFB FAMILY MEMBERS%REACTOME%R-HSA-9006936.5	46	0.259731	1.0251	0.413284	0.665264	1	1278
1233	COOPERATION OF PREFOLDIN AND TRIC CCT IN ACTIN AND TUBULIN FOLDING%REACTOME%R-HSA-389958.2	29	0.296548	1.02506	0.396166	0.664837	1	311
1234	NEGATIVE REGULATION OF RNA BIOSYNTHETIC PROCESS%GOBP%GO:1902679	274	0.19459	1.02491	0.318841	0.664772	1	1548
1235	INHIBITION OF DNA RECOMBINATION AT TELOMERE%REACTOME%R-HSA-9670095.2	38	0.276305	1.02489	0.410658	0.664295	1	2112
1236	PID_AR_PATHWAY%MSIGDB_C2%PID_AR_PATHWAY	35	0.281741	1.0246	0.382166	0.66457	1	1075
1237	BIOCARTA_FCER1_PATHWAY%MSIGDB_C2%BIOCARTA_FCER1_PATHWAY	24	0.307628	1.02439	0.429412	0.664679	1	341
1238	POSTREPLICATION REPAIR%GOBP%GO:0006301	29	0.285584	1.02435	0.427653	0.664228	1	1606
1239	SIGNALING BY WNT%REACTOME%R-HSA-195721.5	171	0.207057	1.02372	0.370968	0.665544	1	1800
1240	NEGATIVE REGULATION OF SECRETION BY CELL%GOBP%GO:1903531	32	0.28352	1.02337	0.42069	0.665916	1	1860
1241	REGULATION OF MRNA STABILITY%GOBP%GO:0043488	125	0.214433	1.02336	0.383333	0.66543	1	2437
1242	POSITIVE REGULATION OF PROTEIN BINDING%GOBP%GO:0032092	34	0.277518	1.02294	0.390909	0.66608	1	1605
1243	REGULATION OF PHOSPHOLIPID METABOLIC PROCESS%GOBP%GO:1903725	35	0.27504	1.02283	0.384615	0.665863	1	914
1244	BIOCARTA_MET_PATHWAY%MSIGDB_C2%BIOCARTA_MET_PATHWAY	25	0.303464	1.02282	0.423295	0.665372	1	1034
1245	INTRACELLULAR TRAFFICKING PROTEINS INVOLVED IN CMT NEUROPATHY%WIKIPATHWAYS_20210210%WP4856%HOMO SAPIENS	19	0.325725	1.02251	0.379603	0.665715	1	2099
1246	BIOCARTA_MAPK_PATHWAY%MSIGDB_C2%BIOCARTA_MAPK_PATHWAY	32	0.290865	1.02242	0.430421	0.665451	1	449
1247	REGULATION OF HEMATOPOIETIC STEM CELL DIFFERENTIATION%GOBP%GO:1902036	52	0.2517	1.02178	0.37218	0.666783	1	2160
1248	ACTIVATION OF PROTEIN KINASE ACTIVITY%GOBP%GO:0032147	112	0.21766	1.02175	0.360215	0.666324	1	1034
1249	AUTOPHAGY OF MITOCHONDRION%GOBP%GO:0000422	15	0.348625	1.02163	0.426229	0.666118	1	687
1250	DUAL INCISION IN TC-NER%REACTOME%R-HSA-6782135.2	42	0.264275	1.02136	0.429967	0.666326	1	1797
1251	CELL CYCLE CHECKPOINT%GOBP%GO:0000075	64	0.240624	1.02114	0.38843	0.666389	1	1342
1252	POSITIVE REGULATION OF CALCIUM ION TRANSMEMBRANE TRANSPORT%GOBP%GO:1904427	17	0.330703	1.02108	0.416	0.666022	1	1736
1253	ANION TRANSMEMBRANE TRANSPORT%GOBP%GO:0098656	64	0.245545	1.021	0.380567	0.665722	1	1844
1254	REGULATION OF MAST CELL DEGRANULATION%GOBP%GO:0043304	15	0.352771	1.02066	0.417344	0.666173	1	1705
1255	RUNX1 INTERACTS WITH CO-FACTORS WHOSE PRECISE EFFECT ON RUNX1 TARGETS IS NOT KNOWN%REACTOME DATABASE ID RELEASE 75%8939243	18	0.336917	1.01977	0.440945	0.668231	1	986
1256	CILIUM ASSEMBLY%REACTOME%R-HSA-5617833.3	74	0.239544	1.01972	0.408654	0.667833	1	1402
1257	REGULATION OF RAS PROTEIN SIGNAL TRANSDUCTION%GOBP%GO:0046578	66	0.241016	1.01896	0.414847	0.669435	1	687
1258	TRANSCRIPTIONAL REGULATION BY RUNX2%REACTOME DATABASE ID RELEASE 75%8878166	74	0.237009	1.01878	0.399142	0.66938	1	2184
1259	PROTEASOME-MEDIATED UBIQUITIN-DEPENDENT PROTEIN CATABOLIC PROCESS%GOBP%GO:0043161	151	0.203877	1.01871	0.366864	0.669057	1	1817
1260	PTEN REGULATION%REACTOME%R-HSA-6807070.2	93	0.222298	1.01818	0.391534	0.67011	1	1828
1261	HETEROPHILIC CELL-CELL ADHESION VIA PLASMA MEMBRANE CELL ADHESION MOLECULES%GOBP%GO:0007157	22	0.312926	1.01801	0.400593	0.670063	1	1687
1262	POSITIVE REGULATION OF SODIUM ION TRANSPORT%GOBP%GO:0010765	18	0.330888	1.01679	0.421203	0.673065	1	1893
1263	NEGATIVE REGULATION OF DNA METABOLIC PROCESS%GOBP%GO:0051053	59	0.244351	1.0163	0.429119	0.673925	1	906
1264	SYNTHESIS OF DNA%REACTOME DATABASE ID RELEASE 75%69239	90	0.226895	1.01615	0.423913	0.67383	1	2062
1265	PID_ECADHERIN_KERATINOCYTE_PATHWAY%MSIGDB_C2%PID_ECADHERIN_KERATINOCYTE_PATHWAY	18	0.32507	1.01615	0.409214	0.673298	1	2437
1266	RNA POLYMERASE I PROMOTER ESCAPE%REACTOME%R-HSA-73772.5	41	0.268805	1.01601	0.403909	0.673181	1	1192
1267	AMYLOID FIBRIL FORMATION%GOBP%GO:1990000	36	0.269624	1.01525	0.432432	0.674928	1	1862
1268	POSITIVE REGULATION OF CATALYTIC ACTIVITY%GOBP%GO:0043085	488	0.187491	1.01517	0.428571	0.674598	1	1068
1269	POSITIVE REGULATION OF GROWTH%GOBP%GO:0045927	81	0.229429	1.01494	0.382775	0.674671	1	1512
1270	OPIOID SIGNALLING%REACTOME%R-HSA-111885.1	57	0.243987	1.01429	0.403226	0.676061	1	1412
1271	CHAPERONE COFACTOR-DEPENDENT PROTEIN REFOLDING%GOBP%GO:0051085	20	0.315167	1.01397	0.395706	0.676431	1	2403
1272	POSITIVE REGULATION OF LOCOMOTION%GOBP%GO:0040017	281	0.192415	1.0139	0.346667	0.676109	1	1110
1273	NEGATIVE REGULATION OF NUCLEIC ACID-TEMPLATED TRANSCRIPTION%GOBP%GO:1903507	273	0.194993	1.01384	0.345679	0.675742	1	1548
1274	MAINTENANCE OF PROTEIN LOCATION%GOBP%GO:0045185	43	0.257858	1.01371	0.427536	0.675547	1	4811
1275	SIGNAL TRANSDUCTION IN RESPONSE TO DNA DAMAGE%GOBP%GO:0042770	37	0.261905	1.01353	0.453172	0.675559	1	1316
1276	TRANS-GOLGI NETWORK VESICLE BUDDING%REACTOME%R-HSA-199992.3	58	0.248037	1.01353	0.411321	0.675032	1	1610
1277	NOTCH%IOB%NOTCH	43	0.263534	1.01347	0.401993	0.674665	1	1617
1278	PID_MTOR_4PATHWAY%MSIGDB_C2%PID_MTOR_4PATHWAY	43	0.259043	1.01346	0.428044	0.674169	1	1586
1279	PROTEIN LOCALIZATION TO MEMBRANE%GOBP%GO:0072657	293	0.194485	1.01344	0.376623	0.673736	1	1684
1280	PLASMA MEMBRANE BOUNDED CELL PROJECTION ASSEMBLY%GOBP%GO:0120031	147	0.210432	1.01341	0.410959	0.673294	1	1241
1281	FCGAMMA RECEPTOR (FCGR) DEPENDENT PHAGOCYTOSIS%REACTOME%R-HSA-2029480.1	63	0.243378	1.01324	0.434043	0.673304	1	1240
1282	MEIOTIC CELL CYCLE%GOBP%GO:0051321	35	0.274966	1.0132	0.404389	0.672875	1	1065
1283	T CELL RECEPTOR SIGNALING PATHWAY%GOBP%GO:0050852	103	0.222801	1.01302	0.407407	0.672873	1	1333
1284	SIGNALING PATHWAYS IN GLIOBLASTOMA%WIKIPATHWAYS_20210210%WP2261%HOMO SAPIENS	46	0.255649	1.01291	0.413284	0.672661	1	1034
1285	REGULATION OF GLUTAMATE RECEPTOR SIGNALING PATHWAY%GOBP%GO:1900449	18	0.328233	1.01291	0.406077	0.672146	1	763
1286	NEGATIVE REGULATION OF CELLULAR COMPONENT MOVEMENT%GOBP%GO:0051271	139	0.21218	1.01249	0.405797	0.672801	1	1349
1287	CELLULAR GLUCAN METABOLIC PROCESS%GOBP%GO:0006073	16	0.337939	1.01176	0.4	0.674463	1	1291
1288	REGULATION OF PH%GOBP%GO:0006885	42	0.260284	1.01157	0.422535	0.674443	1	1913
1289	E-CADHERIN SIGNALING IN KERATINOCYTES%PATHWAY INTERACTION DATABASE NCI-NATURE CURATED DATA%E-CADHERIN SIGNALING IN KERATINOCYTES	18	0.32507	1.01139	0.431755	0.67442	1	2437
1290	NUCLEOTIDE-EXCISION REPAIR, DNA INCISION, 5'-TO LESION%GOBP%GO:0006296	22	0.310868	1.01021	0.407514	0.677318	1	1785
1291	PID_PTP1B_PATHWAY%MSIGDB_C2%PID_PTP1B_PATHWAY	38	0.272393	1.01014	0.417508	0.677003	1	820
1292	BIOCARTA_TCR_PATHWAY%MSIGDB_C2%BIOCARTA_TCR_PATHWAY	26	0.291617	1.01004	0.452941	0.676754	1	341
1293	DOUBLE-STRAND BREAK REPAIR%GOBP%GO:0006302	71	0.232857	1.00993	0.437229	0.676547	1	1125
1294	DNA REPLICATION%REACTOME DATABASE ID RELEASE 75%69306	90	0.226895	1.00983	0.434978	0.676294	1	2062
1295	GLOBAL GENOME NUCLEOTIDE EXCISION REPAIR (GG-NER)%REACTOME DATABASE ID RELEASE 75%5696399	49	0.248809	1.00948	0.423611	0.676777	1	2095
1296	INSULIN RECEPTOR SIGNALING PATHWAY%GOBP%GO:0008286	44	0.256354	1.0091	0.405316	0.677348	1	755
1297	POSITIVE REGULATION OF PROTEIN LOCALIZATION TO MEMBRANE%GOBP%GO:1905477	63	0.238599	1.00897	0.406639	0.67725	1	1285
1298	REGULATION OF ATP BIOSYNTHETIC PROCESS%GOBP%GO:2001169	49	0.255125	1.00867	0.419014	0.677565	1	1605
1299	RNA CATABOLIC PROCESS%GOBP%GO:0006401	178	0.20478	1.00777	0.434109	0.67954	1	2403
1300	POSITIVE REGULATION OF HYDROLASE ACTIVITY%GOBP%GO:0051345	244	0.194964	1.00775	0.48	0.679076	1	1003
1301	RETT SYNDROME CAUSING GENES%WIKIPATHWAYS_20210210%WP4312%HOMO SAPIENS	19	0.3186	1.00762	0.429395	0.67896	1	1204
1302	GLUCAN METABOLIC PROCESS%GOBP%GO:0044042	16	0.337939	1.00758	0.4425	0.678535	1	1291
1303	THYROID HORMONES PRODUCTION AND THEIR PERIPHERAL DOWNSTREAM SIGNALLING EFFECTS%WIKIPATHWAYS_20210210%WP4746%HOMO SAPIENS	38	0.275322	1.0072	0.473684	0.679088	1	1828
1304	REGULATION OF MRNA STABILITY BY PROTEINS THAT BIND AU-RICH ELEMENTS%REACTOME DATABASE ID RELEASE 75%450531	76	0.232175	1.00688	0.454955	0.679561	1	2503
1305	STEROL REGULATORY ELEMENT-BINDING PROTEINS (SREBP) SIGNALLING%WIKIPATHWAYS_20210210%WP1982%HOMO SAPIENS	38	0.262	1.00678	0.440678	0.679315	1	1177
1306	IMPORT ACROSS PLASMA MEMBRANE%GOBP%GO:0098739	52	0.254868	1.00674	0.415638	0.678958	1	1818
1307	IL-7 SIGNALING PATHWAY%WIKIPATHWAYS_20210210%WP205%HOMO SAPIENS	16	0.331127	1.00635	0.433604	0.679554	1	1291
1308	RECEPTOR CATABOLIC PROCESS%GOBP%GO:0032801	17	0.323658	1.00514	0.44058	0.682609	1	694
1309	HDR THROUGH SINGLE STRAND ANNEALING (SSA)%REACTOME DATABASE ID RELEASE 75%5685938	16	0.335306	1.00499	0.440541	0.682523	1	575
1310	INTERACTIONS OF REV WITH HOST CELLULAR PROTEINS%REACTOME DATABASE ID RELEASE 75%177243	30	0.282773	1.00474	0.438953	0.682735	1	1178
1311	PID_THROMBIN_PAR1_PATHWAY%MSIGDB_C2%PID_THROMBIN_PAR1_PATHWAY	36	0.272282	1.00403	0.438127	0.684254	1	2007
1312	PAR1-MEDIATED THROMBIN SIGNALING EVENTS%PATHWAY INTERACTION DATABASE NCI-NATURE CURATED DATA%PAR1-MEDIATED THROMBIN SIGNALING EVENTS	36	0.272282	1.00397	0.446875	0.683861	1	2007
1313	POSITIVE REGULATION OF CELL JUNCTION ASSEMBLY%GOBP%GO:1901890	22	0.315746	1.00301	0.447368	0.686118	1	2838
1314	REGULATION OF HEMATOPOIETIC PROGENITOR CELL DIFFERENTIATION%GOBP%GO:1901532	57	0.244197	1.00283	0.408088	0.686136	1	2062
1315	MITOCHONDRION DISASSEMBLY%GOBP%GO:0061726	15	0.348625	1.00245	0.420779	0.686634	1	687
1316	MULTICELLULAR ORGANISMAL WATER HOMEOSTASIS%GOBP%GO:0050891	29	0.286416	1.00244	0.426056	0.686139	1	1338
1317	REGULATION OF CELLULAR PH%GOBP%GO:0030641	41	0.260696	1.00221	0.426229	0.686303	1	1913
1318	NEGATIVE REGULATION OF CELLULAR PROTEIN METABOLIC PROCESS%GOBP%GO:0032269	388	0.183038	1.00187	0.446809	0.686784	1	1601
1319	CILIUM ASSEMBLY%GOBP%GO:0060271	105	0.215869	1.00171	0.483092	0.68674	1	1846
1320	PRESYNAPTIC PHASE OF HOMOLOGOUS DNA PAIRING AND STRAND EXCHANGE%REACTOME%R-HSA-5693616.1	15	0.34117	1.00158	0.450521	0.686629	1	575
1321	CONSTITUTIVE SIGNALING BY ABERRANT PI3K IN CANCER%REACTOME%R-HSA-2219530.1	21	0.299499	1.00156	0.461749	0.686148	1	310
1322	MEIOTIC CELL CYCLE PROCESS%GOBP%GO:1903046	24	0.297225	1.00154	0.441176	0.68568	1	984
1323	NEGATIVE REGULATION OF CELL CYCLE%GOBP%GO:0045786	208	0.197159	1.00114	0.449153	0.686422	1	1792
1324	IL5%NETPATH%IL5	41	0.261846	0.999886	0.477193	0.689511	1	1333
1325	MYD88-INDEPENDENT TOLL-LIKE RECEPTOR SIGNALING PATHWAY%GOBP%GO:0002756	16	0.332008	0.99888	0.45288	0.691898	1	1031
1326	NEGATIVE REGULATION OF BINDING%GOBP%GO:0051100	60	0.236296	0.998498	0.431298	0.692478	1	1614
1327	POSITIVE REGULATION OF GLUCOSE TRANSMEMBRANE TRANSPORT%GOBP%GO:0010828	17	0.335181	0.998407	0.439891	0.692267	1	113
1328	CARDIAC CHAMBER DEVELOPMENT%GOBP%GO:0003205	39	0.260127	0.998047	0.468439	0.692811	1	733
1329	TCR%NETPATH%TCR	162	0.203588	0.99774	0.487342	0.69312	1	1333
1330	STABILIZATION AND EXPANSION OF THE E-CADHERIN ADHERENS JUNCTION%PATHWAY INTERACTION DATABASE NCI-NATURE CURATED DATA%STABILIZATION AND EXPANSION OF THE E-CADHERIN ADHERENS JUNCTION	35	0.27422	0.995961	0.41958	0.697637	1	1684
1331	REGULATION OF PROTEIN LOCALIZATION TO CELL SURFACE%GOBP%GO:2000008	21	0.305209	0.995771	0.461538	0.697668	1	769
1332	SULFUR AMINO ACID METABOLISM%REACTOME DATABASE ID RELEASE 75%1614635	22	0.312223	0.995478	0.442771	0.698025	1	1770
1333	POSITIVE REGULATION OF TRANSFERASE ACTIVITY%GOBP%GO:0051347	261	0.194873	0.995034	0.457447	0.698831	1	1068
1334	TRAIL%IOB%TRAIL	37	0.268048	0.994357	0.46875	0.700287	1	1544
1335	HALLMARK_INTERFERON_ALPHA_RESPONSE%MSIGDB_C2%HALLMARK_INTERFERON_ALPHA_RESPONSE	41	0.260514	0.994126	0.430921	0.700481	1	1693
1336	REGULATION OF PROTEIN LOCALIZATION TO MEMBRANE%GOBP%GO:1905475	99	0.221926	0.993804	0.497585	0.70088	1	1285
1337	REGULATION OF CHROMOSOME SEGREGATION%GOBP%GO:0051983	52	0.243795	0.993402	0.476667	0.70147	1	1884
1338	REGULATION OF MICROTUBULE CYTOSKELETON%WIKIPATHWAYS_20210210%WP2038%HOMO SAPIENS	29	0.282284	0.993396	0.419355	0.700954	1	2576
1339	NEGATIVE REGULATION OF CATALYTIC ACTIVITY%GOBP%GO:0043086	255	0.194346	0.992868	0.458333	0.701955	1	1762
1340	ANION HOMEOSTASIS%GOBP%GO:0055081	20	0.312559	0.992733	0.452778	0.701817	1	1516
1341	PID_RHOA_PATHWAY%MSIGDB_C2%PID_RHOA_PATHWAY	28	0.288621	0.992649	0.475904	0.70152	1	1037
1342	RESPONSE TO PEPTIDE%GOBP%GO:1901652	151	0.205394	0.991038	0.486111	0.7056	1	798
1343	REGULATION OF ACTIN CYTOSKELETON%WIKIPATHWAYS_20210210%WP51%HOMO SAPIENS	91	0.215372	0.990927	0.497778	0.705396	1	1037
1344	REGULATION OF RNA STABILITY%GOBP%GO:0043487	130	0.204976	0.990658	0.496815	0.705659	1	2437
1345	REGULATION OF GLYCOLYTIC PROCESS%GOBP%GO:0006110	44	0.254299	0.990086	0.443609	0.706759	1	1605
1346	NEGATIVE REGULATION OF RESPONSE TO CYTOKINE STIMULUS%GOBP%GO:0060761	24	0.301107	0.989666	0.449704	0.707444	1	1098
1347	REGULATION OF TRANSCRIPTION ELONGATION FROM RNA POLYMERASE II PROMOTER%GOBP%GO:0034243	16	0.32664	0.989349	0.475504	0.707819	1	1916
1348	ALZHEIMERS DISEASE%WIKIPATHWAYS_20210210%WP2059%HOMO SAPIENS	50	0.244363	0.988887	0.47931	0.708606	1	1412
1349	APOPTOTIC PROCESS%GOBP%GO:0006915	193	0.195088	0.988536	0.532787	0.709146	1	1315
1350	POSITIVE REGULATION OF CHEMOKINE PRODUCTION%GOBP%GO:0032722	23	0.298823	0.988051	0.47006	0.710014	1	1330
1351	RHOA SIGNALING PATHWAY%PATHWAY INTERACTION DATABASE NCI-NATURE CURATED DATA%RHOA SIGNALING PATHWAY	28	0.288621	0.987734	0.465625	0.710404	1	1037
1352	VACUOLE ORGANIZATION%GOBP%GO:0007033	58	0.242476	0.987086	0.46063	0.711756	1	1956
1353	IL-6 SIGNALING PATHWAY%WIKIPATHWAYS_20210210%WP364%HOMO SAPIENS	28	0.28531	0.986598	0.463277	0.712597	1	1291
1354	REGULATION OF NUCLEOTIDE CATABOLIC PROCESS%GOBP%GO:0030811	44	0.254299	0.986538	0.47973	0.712236	1	1605
1355	NCRNA METABOLIC PROCESS%GOBP%GO:0034660	297	0.190136	0.98491	0.5	0.716456	1	1472
1356	REGULATION OF SYNAPTIC VESICLE CYCLE%GOBP%GO:0098693	23	0.298987	0.983942	0.46	0.718719	1	2140
1357	HOMOLOGOUS DNA PAIRING AND STRAND EXCHANGE%REACTOME DATABASE ID RELEASE 75%5693579	15	0.34117	0.98385	0.490909	0.71845	1	575
1358	PROTEIN K48-LINKED UBIQUITINATION%GOBP%GO:0070936	16	0.332023	0.983681	0.474255	0.718384	1	1068
1359	POSITIVE REGULATION OF MITOCHONDRION ORGANIZATION%GOBP%GO:0010822	55	0.242567	0.983558	0.534351	0.718161	1	1291
1360	PEPTIDE HORMONE METABOLISM%REACTOME DATABASE ID RELEASE 75%2980736	42	0.249268	0.983545	0.506803	0.71767	1	967
1361	CARDIAC CHAMBER MORPHOGENESIS%GOBP%GO:0003206	37	0.264761	0.983174	0.458333	0.718309	1	733
1362	MITOTIC CELL CYCLE PHASE TRANSITION%GOBP%GO:0044772	105	0.210437	0.982808	0.49711	0.718827	1	2140
1363	ENTRY INTO CELL OF OTHER ORGANISM INVOLVED IN SYMBIOTIC INTERACTION%GOBP%GO:0051806	31	0.274584	0.9828	0.47929	0.718318	1	2246
1364	MUSCLE CELL DEVELOPMENT%GOBP%GO:0055001	38	0.257627	0.98273	0.480427	0.717983	1	1505
1365	DEFENSE RESPONSE TO GRAM-NEGATIVE BACTERIUM%GOBP%GO:0050829	29	0.278533	0.982259	0.489676	0.718873	1	764
1366	POSITIVE REGULATION OF CELL CYCLE PROCESS%GOBP%GO:0090068	102	0.214496	0.981975	0.450777	0.719161	1	1524
1367	ENTRY INTO HOST%GOBP%GO:0044409	31	0.274584	0.981781	0.478125	0.719194	1	2246
1368	RAS PROTEIN SIGNAL TRANSDUCTION%GOBP%GO:0007265	85	0.220525	0.981277	0.485981	0.720197	1	1002
1369	CAMERA-TYPE EYE DEVELOPMENT%GOBP%GO:0043010	44	0.25011	0.981096	0.488372	0.720237	1	1247
1370	PID_LKB1_PATHWAY%MSIGDB_C2%PID_LKB1_PATHWAY	27	0.290184	0.981056	0.45625	0.719808	1	1998
1371	CYTOPLASMIC PATTERN RECOGNITION RECEPTOR SIGNALING PATHWAY%GOBP%GO:0002753	22	0.290948	0.980968	0.48324	0.719541	1	1215
1372	POSITIVE REGULATION OF ENDOPEPTIDASE ACTIVITY%GOBP%GO:0010950	77	0.229392	0.980236	0.452174	0.721137	1	1582
1373	ER TO GOLGI ANTEROGRADE TRANSPORT%REACTOME DATABASE ID RELEASE 75%199977	104	0.212696	0.979539	0.505376	0.722653	1	2598
1374	FOXM1 TRANSCRIPTION FACTOR NETWORK%PATHWAY INTERACTION DATABASE NCI-NATURE CURATED DATA%FOXM1 TRANSCRIPTION FACTOR NETWORK	15	0.330595	0.978526	0.480114	0.72508	1	1803
1375	REGULATION OF ANDROGEN RECEPTOR ACTIVITY%PATHWAY INTERACTION DATABASE NCI-NATURE CURATED DATA%REGULATION OF ANDROGEN RECEPTOR ACTIVITY	18	0.318829	0.978418	0.480938	0.724899	1	1291
1376	INOSITOL PHOSPHATE METABOLISM%REACTOME%R-HSA-1483249.3	23	0.299706	0.97814	0.48169	0.725123	1	1529
1377	RNA POLYMERASE III ABORTIVE AND RETRACTIVE INITIATION%REACTOME%R-HSA-749476.2	18	0.313394	0.976828	0.491003	0.728383	1	811
1378	DENDRITE MORPHOGENESIS%GOBP%GO:0048813	18	0.314803	0.976792	0.480114	0.727942	1	468
1379	RNA POLYMERASE III TRANSCRIPTION%REACTOME DATABASE ID RELEASE 75%74158	18	0.313394	0.976412	0.489552	0.728556	1	811
1380	T CELL COSTIMULATION%GOBP%GO:0031295	25	0.291892	0.976129	0.476341	0.72885	1	96
1381	POSITIVE REGULATION OF CATION TRANSMEMBRANE TRANSPORT%GOBP%GO:1904064	45	0.251874	0.975886	0.479167	0.729059	1	1789
1382	ONE CARBON METABOLISM%WIKIPATHWAYS_20210210%WP241%HOMO SAPIENS	23	0.298029	0.975651	0.462644	0.729198	1	2487
1383	ESR-MEDIATED SIGNALING%REACTOME%R-HSA-8939211.2	103	0.218791	0.975499	0.491429	0.729132	1	1204
1384	LEISHMANIA PHAGOCYTOSIS%REACTOME DATABASE ID RELEASE 75%9664417	47	0.244529	0.975476	0.5	0.728667	1	1240
1385	NEGATIVE REGULATION OF CELL CYCLE PHASE TRANSITION%GOBP%GO:1901988	112	0.20918	0.975044	0.505495	0.729436	1	1711
1386	ACTIN FILAMENT-BASED TRANSPORT%GOBP%GO:0099515	16	0.330672	0.974473	0.464752	0.730569	1	1857
1387	NEGATIVE REGULATION OF CELL PROJECTION ORGANIZATION%GOBP%GO:0031345	63	0.228761	0.974383	0.55642	0.730283	1	820
1388	PI5P, PP2A AND IER3 REGULATE PI3K AKT SIGNALING%REACTOME DATABASE ID RELEASE 75%6811558	40	0.258467	0.974372	0.510563	0.729795	1	310
1389	GENE SILENCING BY RNA%REACTOME%R-HSA-211000.2	69	0.23017	0.974017	0.497778	0.73026	1	1192
1390	HEAD AND NECK SQUAMOUS CELL CARCINOMA%WIKIPATHWAYS_20210210%WP4674%HOMO SAPIENS	40	0.255759	0.973878	0.464029	0.730117	1	1828
1391	TRANSITION METAL ION TRANSPORT%GOBP%GO:0000041	41	0.254684	0.973641	0.507194	0.7303	1	1620
1392	ENTRY INTO OTHER ORGANISM INVOLVED IN SYMBIOTIC INTERACTION%GOBP%GO:0051828	31	0.274584	0.973256	0.475904	0.730896	1	2246
1393	SNRNA METABOLIC PROCESS%GOBP%GO:0016073	46	0.245578	0.972388	0.50173	0.732938	1	1445
1394	PHOSPHATIDYLINOSITOL-MEDIATED SIGNALING%GOBP%GO:0048015	28	0.278327	0.972222	0.488889	0.732877	1	402
1395	CELL-MATRIX ADHESION%GOBP%GO:0007160	66	0.23053	0.972127	0.510204	0.732604	1	606
1396	NEURON PROJECTION ORGANIZATION%GOBP%GO:0106027	21	0.308212	0.971536	0.479675	0.733785	1	468
1397	TRANSCRIPTION-COUPLED NUCLEOTIDE EXCISION REPAIR (TC-NER)%REACTOME%R-HSA-6781827.1	54	0.240435	0.971425	0.513889	0.73358	1	1803
1398	DNA RECOMBINATION%GOBP%GO:0006310	55	0.23775	0.971101	0.514706	0.734019	1	904
1399	POSTTRANSLATIONAL REGULATION OF ADHERENS JUNCTION STABILITY AND DISSASSEMBLY%PATHWAY INTERACTION DATABASE NCI-NATURE CURATED DATA%POSTTRANSLATIONAL REGULATION OF ADHERENS JUNCTION STABILITY AND DISSASSEMBLY	35	0.257438	0.971085	0.51049	0.733542	1	2382
1400	REGULATION OF PROTEIN LOCALIZATION TO NUCLEUS%GOBP%GO:1900180	53	0.245479	0.970991	0.520599	0.733284	1	1129
1401	PARASITE INFECTION%REACTOME%R-HSA-9664407.1	47	0.244529	0.970448	0.520446	0.734346	1	1240
1402	REGULATION OF CELL CYCLE PHASE TRANSITION%GOBP%GO:1901987	201	0.189849	0.970034	0.642276	0.735052	1	2062
1403	REGULATION OF ANION TRANSPORT%GOBP%GO:0044070	41	0.250225	0.96917	0.503268	0.7371	1	1213
1404	HALLMARK_INTERFERON_GAMMA_RESPONSE%MSIGDB_C2%HALLMARK_INTERFERON_GAMMA_RESPONSE	93	0.216034	0.968913	0.512077	0.737347	1	1380
1405	CATION HOMEOSTASIS%GOBP%GO:0055080	199	0.190976	0.96855	0.608333	0.737906	1	1668
1406	REGULATION OF MITOTIC SISTER CHROMATID SEGREGATION%GOBP%GO:0033047	36	0.265052	0.968435	0.511401	0.737731	1	1884
1407	GLUTATHIONE METABOLIC PROCESS%GOBP%GO:0006749	30	0.271319	0.967632	0.477987	0.739505	1	1555
1408	IRON ION TRANSPORT%GOBP%GO:0006826	33	0.265895	0.967033	0.493056	0.740689	1	1265
1409	ANDROGEN RECEPTOR SIGNALING PATHWAY%WIKIPATHWAYS_20210210%WP138%HOMO SAPIENS	44	0.247054	0.9668	0.494505	0.74084	1	1544
1410	NEGATIVE REGULATION OF CYSTEINE-TYPE ENDOPEPTIDASE ACTIVITY INVOLVED IN APOPTOTIC PROCESS%GOBP%GO:0043154	32	0.266308	0.966176	0.493421	0.742168	1	1285
1411	REGULATION OF MAST CELL ACTIVATION%GOBP%GO:0033003	20	0.303642	0.96587	0.497207	0.742564	1	1705
1412	TRANSFERRIN ENDOCYTOSIS AND RECYCLING%REACTOME DATABASE ID RELEASE 75%917977	21	0.301688	0.965417	0.517341	0.743381	1	2440
1413	BINDING AND UPTAKE OF LIGANDS BY SCAVENGER RECEPTORS%REACTOME DATABASE ID RELEASE 75%2173782	35	0.262156	0.965229	0.490909	0.743383	1	1265
1414	EXTRA-NUCLEAR ESTROGEN SIGNALING%REACTOME%R-HSA-9009391.3	38	0.254562	0.964986	0.525641	0.743507	1	438
1415	PHOSPHOLIPID METABOLISM%REACTOME%R-HSA-1483257.3	87	0.212168	0.964728	0.483193	0.743719	1	977
1416	EYE DEVELOPMENT%GOBP%GO:0001654	59	0.232272	0.964712	0.512727	0.743235	1	1247
1417	PI3 KINASE PATHWAY%PANTHER PATHWAY%P00048	24	0.283198	0.964456	0.495298	0.743428	1	588
1418	REGULATION OF CYSTEINE-TYPE ENDOPEPTIDASE ACTIVITY INVOLVED IN APOPTOTIC PROCESS%GOBP%GO:0043281	87	0.213118	0.964333	0.545	0.743244	1	1285
1419	CIRCADIAN REGULATION OF GENE EXPRESSION%GOBP%GO:0032922	22	0.291251	0.964095	0.495727	0.743398	1	1514
1420	ENTRY INTO HOST CELL%GOBP%GO:0030260	31	0.274584	0.96404	0.496711	0.743051	1	2246
1421	AMPLIFICATION OF SIGNAL FROM UNATTACHED KINETOCHORES VIA A MAD2 INHIBITORY SIGNAL%REACTOME%R-HSA-141444.2	54	0.236304	0.963908	0.515504	0.7429	1	2070
1422	PID_AR_TF_PATHWAY%MSIGDB_C2%PID_AR_TF_PATHWAY	18	0.318829	0.963291	0.5	0.74417	1	1291
1423	REGULATION OF ANATOMICAL STRUCTURE SIZE%GOBP%GO:0090066	194	0.194177	0.963037	0.605769	0.744469	1	1779
1424	PID_AVB3_OPN_PATHWAY%MSIGDB_C2%PID_AVB3_OPN_PATHWAY	24	0.295813	0.963034	0.502857	0.743954	1	2406
1425	NEGATIVE REGULATION OF AUTOPHAGY%GOBP%GO:0010507	30	0.270027	0.962954	0.52862	0.743663	1	2519
1426	MRNA STABILIZATION%GOBP%GO:0048255	20	0.306394	0.962675	0.518414	0.743927	1	2415
1427	INTERLEUKIN-1 FAMILY SIGNALING%REACTOME%R-HSA-446652.7	85	0.219053	0.962583	0.542289	0.74368	1	2187
1428	POSITIVE REGULATION OF CELL CYCLE%GOBP%GO:0045787	135	0.201335	0.962388	0.568421	0.743753	1	1524
1429	NEGATIVE REGULATION OF THE PI3K AKT NETWORK%REACTOME DATABASE ID RELEASE 75%199418	42	0.250338	0.962359	0.5	0.743323	1	310
1430	PID_ALPHA_SYNUCLEIN_PATHWAY%MSIGDB_C2%PID_ALPHA_SYNUCLEIN_PATHWAY	24	0.293597	0.962322	0.505848	0.742896	1	765
1431	PROTEIN STABILIZATION%GOBP%GO:0050821	97	0.211978	0.962134	0.556701	0.742951	1	1190
1432	SIGNALING BY PDGF%REACTOME%R-HSA-186797.4	44	0.248981	0.960753	0.507519	0.746319	1	991
1433	TELOMERE MAINTENANCE VIA TELOMERE LENGTHENING%GOBP%GO:0010833	21	0.298857	0.960117	0.508287	0.747638	1	1586
1434	POSITIVE REGULATION OF EPIDERMAL GROWTH FACTOR RECEPTOR SIGNALING PATHWAY%GOBP%GO:0045742	16	0.317157	0.960032	0.518817	0.747356	1	296
1435	INTERFERON TYPE I SIGNALING PATHWAYS%WIKIPATHWAYS_20210210%WP585%HOMO SAPIENS	31	0.272103	0.960004	0.531773	0.746923	1	716
1436	CELL-SUBSTRATE JUNCTION ASSEMBLY%GOBP%GO:0007044	27	0.28462	0.959957	0.510903	0.746543	1	2161
1437	NON-RECOMBINATIONAL REPAIR%GOBP%GO:0000726	30	0.263441	0.959897	0.546584	0.7462	1	1125
1438	CELL KILLING%GOBP%GO:0001906	39	0.25212	0.959853	0.555921	0.745807	1	1750
1439	TELOMERE MAINTENANCE VIA TELOMERASE%GOBP%GO:0007004	21	0.298857	0.959793	0.475904	0.745454	1	1586
1440	INTERSTRAND CROSS-LINK REPAIR%GOBP%GO:0036297	16	0.320719	0.959681	0.494652	0.74525	1	239
1441	SIGNALING BY ERYTHROPOIETIN%REACTOME%R-HSA-9006335.2	15	0.337904	0.959534	0.493573	0.745141	1	991
1442	FCGR3A-MEDIATED PHAGOCYTOSIS%REACTOME%R-HSA-9664422.1	47	0.244529	0.959488	0.506579	0.744745	1	1240
1443	AMPLIFICATION OF SIGNAL FROM THE KINETOCHORES%REACTOME DATABASE ID RELEASE 75%141424	54	0.236304	0.959058	0.525362	0.745438	1	2070
1444	PID_AJDISS_2PATHWAY%MSIGDB_C2%PID_AJDISS_2PATHWAY	35	0.257438	0.95895	0.512579	0.745217	1	2382
1445	NEGATIVE REGULATION OF CELLULAR MACROMOLECULE BIOSYNTHETIC PROCESS%GOBP%GO:2000113	353	0.182489	0.958559	0.686275	0.745789	1	1552
1446	POSITIVE REGULATION OF VIRAL GENOME REPLICATION%GOBP%GO:0045070	24	0.290965	0.95855	0.495522	0.745302	1	904
1447	PID_ARF6_PATHWAY%MSIGDB_C2%PID_ARF6_PATHWAY	24	0.284713	0.958403	0.515581	0.745194	1	2161
1448	POSITIVE REGULATION OF MACROAUTOPHAGY%GOBP%GO:0016239	32	0.263331	0.957705	0.529586	0.746615	1	1060
1449	MITOTIC SPINDLE ORGANIZATION%GOBP%GO:0007052	89	0.214011	0.957385	0.60274	0.746986	1	1418
1450	CXCR4%IOB%CXCR4	67	0.222732	0.957133	0.57265	0.747172	1	1034
1451	ATM SIGNALING PATHWAY%WIKIPATHWAYS_20210210%WP2516%HOMO SAPIENS	16	0.330005	0.956387	0.495751	0.748797	1	1586
1452	CYTOPLASMIC TRANSLATION%GOBP%GO:0002181	101	0.208906	0.956081	0.546729	0.749143	1	2399
1453	KILLING OF CELLS OF OTHER ORGANISM%GOBP%GO:0031640	25	0.281814	0.955751	0.54142	0.749509	1	1177
1454	CARDIOCYTE DIFFERENTIATION%GOBP%GO:0035051	23	0.289363	0.955634	0.514535	0.749354	1	1000
1455	POSITIVE REGULATION OF TRANSPORTER ACTIVITY%GOBP%GO:0032411	37	0.258059	0.954616	0.504673	0.751703	1	1668
1456	MRNA CATABOLIC PROCESS%GOBP%GO:0006402	164	0.189378	0.953257	0.617021	0.754996	1	2403
1457	ENDOCYTOSIS%GOBP%GO:0006897	271	0.181228	0.953196	0.648352	0.754628	1	1273
1458	RNA-DEPENDENT DNA BIOSYNTHETIC PROCESS%GOBP%GO:0006278	22	0.295114	0.952965	0.538889	0.754751	1	1586
1459	POSITIVE REGULATION OF PROTEIN TARGETING TO MEMBRANE%GOBP%GO:0090314	16	0.322323	0.952188	0.530769	0.756534	1	657
1460	PHOSPHATIDYLINOSITOL METABOLIC PROCESS%GOBP%GO:0046488	64	0.226644	0.952144	0.520599	0.756142	1	588
1461	DISASSEMBLY OF THE DESTRUCTION COMPLEX AND RECRUITMENT OF AXIN TO THE MEMBRANE%REACTOME%R-HSA-4641262.3	15	0.327679	0.951755	0.524675	0.756696	1	2169
1462	NEUROTROPHIC FACTOR-MEDIATED TRK RECEPTOR SIGNALING%PATHWAY INTERACTION DATABASE NCI-NATURE CURATED DATA%NEUROTROPHIC FACTOR-MEDIATED TRK RECEPTOR SIGNALING	36	0.256272	0.951553	0.515723	0.756751	1	1034
1463	BIOCARTA_TFF_PATHWAY%MSIGDB_C2%BIOCARTA_TFF_PATHWAY	16	0.327885	0.951173	0.5	0.757283	1	96
1464	NRF2-ARE REGULATION%WIKIPATHWAYS_20210210%WP4357%HOMO SAPIENS	17	0.312565	0.951172	0.51706	0.756775	1	1732
1465	PROTEASOMAL PROTEIN CATABOLIC PROCESS%GOBP%GO:0010498	164	0.194797	0.950837	0.637584	0.757217	1	1716
1466	SIGNALING BY FGFR2%REACTOME DATABASE ID RELEASE 75%5654738	40	0.252655	0.950675	0.533333	0.757157	1	1408
1467	INOSITOL LIPID-MEDIATED SIGNALING%GOBP%GO:0048017	28	0.278327	0.950631	0.522727	0.756763	1	402
1468	DISRUPTION OF CELLS OF OTHER ORGANISM%GOBP%GO:0044364	25	0.281814	0.950094	0.549254	0.75776	1	1177
1469	S PHASE%REACTOME DATABASE ID RELEASE 75%69242	107	0.204934	0.949073	0.548718	0.760109	1	1828
1470	RUNX1 REGULATES GENES INVOLVED IN MEGAKARYOCYTE DIFFERENTIATION AND PLATELET FUNCTION%REACTOME DATABASE ID RELEASE 75%8936459	45	0.241449	0.949025	0.546326	0.759737	1	1253
1471	REGULATION OF APOPTOTIC SIGNALING PATHWAY%GOBP%GO:2001233	135	0.196242	0.948612	0.593103	0.760399	1	1291
1472	CYTOKINE SIGNALING IN IMMUNE SYSTEM%REACTOME DATABASE ID RELEASE 75%1280215	336	0.177583	0.948495	0.690909	0.760198	1	1333
1473	REGULATION OF SECRETION%GOBP%GO:0051046	186	0.188269	0.94822	0.682927	0.760493	1	1779
1474	CELL PROJECTION ASSEMBLY%GOBP%GO:0030031	157	0.193389	0.947956	0.632353	0.760694	1	1241
1475	STIMULATORY C-TYPE LECTIN RECEPTOR SIGNALING PATHWAY%GOBP%GO:0002223	81	0.211056	0.947177	0.569507	0.762337	1	275
1476	PARKIN-UBIQUITIN PROTEASOMAL SYSTEM PATHWAY%WIKIPATHWAYS_20210210%WP2359%HOMO SAPIENS	55	0.23394	0.945508	0.548872	0.766532	1	2160
1477	SIGNALING EVENTS REGULATED BY RET TYROSINE KINASE%PATHWAY INTERACTION DATABASE NCI-NATURE CURATED DATA%SIGNALING EVENTS REGULATED BY RET TYROSINE KINASE	24	0.285126	0.945404	0.549575	0.766299	1	689
1478	REGULATION OF MITOCHONDRION ORGANIZATION%GOBP%GO:0010821	78	0.215576	0.9453	0.602679	0.766111	1	1291
1479	GLYCEROPHOSPHOLIPID BIOSYNTHETIC PROCESS%GOBP%GO:0046474	88	0.216174	0.943962	0.565611	0.769255	1	588
1480	INORGANIC ION HOMEOSTASIS%GOBP%GO:0098771	201	0.189384	0.943373	0.729167	0.770374	1	1668
1481	INNATE IMMUNE RESPONSE ACTIVATING CELL SURFACE RECEPTOR SIGNALING PATHWAY%GOBP%GO:0002220	82	0.210407	0.943325	0.608889	0.770005	1	275
1482	REGULATION OF RESPONSE TO DRUG%GOBP%GO:2001023	22	0.289196	0.942014	0.545699	0.773167	1	1173
1483	PROGRAMMED CELL DEATH%REACTOME DATABASE ID RELEASE 75%5357801	138	0.194776	0.941975	0.64557	0.772741	1	2062
1484	ASSOCIATION BETWEEN PHYSICO-CHEMICAL FEATURES AND TOXICITY ASSOCIATED PATHWAYS%WIKIPATHWAYS_20210210%WP3680%HOMO SAPIENS	39	0.244495	0.941968	0.54485	0.772236	1	1291
1485	NEGATIVE REGULATION OF NF-KAPPAB TRANSCRIPTION FACTOR ACTIVITY%GOBP%GO:0032088	30	0.271267	0.941913	0.560372	0.771845	1	1477
1486	POSITIVE REGULATION OF RAS PROTEIN SIGNAL TRANSDUCTION%GOBP%GO:0046579	25	0.277021	0.941693	0.585635	0.771936	1	1501
1487	POSITIVE REGULATION OF ATPASE ACTIVITY%GOBP%GO:0032781	28	0.268696	0.941666	0.560976	0.771481	1	1813
1488	TGF-BETA SIGNALING PATHWAY%WIKIPATHWAYS_20210210%WP366%HOMO SAPIENS	72	0.212962	0.941424	0.661355	0.771674	1	1617
1489	COFACTOR TRANSPORT%GOBP%GO:0051181	22	0.292105	0.941062	0.55	0.772068	1	1294
1490	MAINTENANCE OF PERMEABILITY OF BLOOD-BRAIN BARRIER%GOBP%GO:0035633	23	0.288084	0.940767	0.553314	0.772351	1	1518
1491	CELLULAR RESPONSE TO AMYLOID-BETA%GOBP%GO:1904646	22	0.29409	0.94031	0.519444	0.773121	1	404
1492	REGULATION OF TOLL-LIKE RECEPTOR SIGNALING PATHWAY%WIKIPATHWAYS_20210210%WP1449%HOMO SAPIENS	49	0.237882	0.940279	0.561265	0.772676	1	1170
1493	TCR SIGNALING IN NAIVE CD4+ T CELLS%PATHWAY INTERACTION DATABASE NCI-NATURE CURATED DATA%TCR SIGNALING IN NAIVE CD4+ T CELLS	42	0.246634	0.940269	0.563758	0.772189	1	445
1494	REGULATION OF AMYLOID PRECURSOR PROTEIN CATABOLIC PROCESS%GOBP%GO:1902991	24	0.282758	0.939605	0.558824	0.773513	1	356
1495	ANTIGEN PROCESSING: UBIQUITINATION & PROTEASOME DEGRADATION%REACTOME%R-HSA-983168.2	139	0.193452	0.939443	0.623377	0.773483	1	2076
1496	POSITIVE REGULATION OF INTERLEUKIN-8 PRODUCTION%GOBP%GO:0032757	30	0.257578	0.938655	0.571429	0.775134	1	2542
1497	DNA REPLICATION PRE-INITIATION%REACTOME DATABASE ID RELEASE 75%69002	61	0.230747	0.938487	0.603113	0.775096	1	2394
1498	REGULATION OF PROTEASOMAL UBIQUITIN-DEPENDENT PROTEIN CATABOLIC PROCESS%GOBP%GO:0032434	59	0.224017	0.937798	0.572519	0.776473	1	1291
1499	INTERMEDIATE FILAMENT ORGANIZATION%GOBP%GO:0045109	16	0.309757	0.937248	0.511299	0.777413	1	1254
1500	POSITIVE REGULATION OF AUTOPHAGY%GOBP%GO:0010508	51	0.231878	0.937176	0.583643	0.777098	1	1356
1501	PID_TRKR_PATHWAY%MSIGDB_C2%PID_TRKR_PATHWAY	36	0.256272	0.937145	0.55414	0.776663	1	1034
1502	SIGNALING BY FGFR IN DISEASE%REACTOME DATABASE ID RELEASE 75%1226099	33	0.254045	0.936911	0.557003	0.776747	1	1408
1503	DEFECTIVE B3GAT3 CAUSES JDSSDHD%REACTOME%R-HSA-3560801.1	19	0.30404	0.936229	0.534247	0.778177	1	558
1504	REGULATION OF LIPID KINASE ACTIVITY%GOBP%GO:0043550	22	0.284857	0.935447	0.560241	0.77983	1	1030
1505	RESPONSE TO HEAT%GOBP%GO:0009408	35	0.257	0.93531	0.555195	0.779659	1	1168
1506	DISEASES OF SIGNAL TRANSDUCTION BY GROWTH FACTOR RECEPTORS AND SECOND MESSENGERS%REACTOME DATABASE ID RELEASE 75%5663202	215	0.182181	0.935053	0.607843	0.779822	1	1778
1507	NEGATIVE REGULATION OF SMALL GTPASE MEDIATED SIGNAL TRANSDUCTION%GOBP%GO:0051058	19	0.302637	0.934761	0.55163	0.780058	1	820
1508	ESTABLISHMENT OF PROTEIN LOCALIZATION TO MEMBRANE%GOBP%GO:0090150	194	0.182868	0.93424	0.71831	0.781019	1	2399
1509	SULFUR AMINO ACID METABOLIC PROCESS%GOBP%GO:0000096	29	0.266928	0.934075	0.542857	0.78098	1	1435
1510	LYMPHOCYTE COSTIMULATION%GOBP%GO:0031294	26	0.277181	0.932957	0.560748	0.7835	1	96
1511	FGFR2 ALTERNATIVE SPLICING%REACTOME DATABASE ID RELEASE 75%6803529	21	0.29096	0.932736	0.552356	0.783581	1	1408
1512	BLOOD VESSEL MORPHOGENESIS%GOBP%GO:0048514	121	0.198967	0.932671	0.626582	0.783236	1	1009
1513	MET IN TYPE 1 PAPILLARY RENAL CELL CARCINOMA%WIKIPATHWAYS_20210210%WP4205%HOMO SAPIENS	36	0.25224	0.932545	0.6	0.783071	1	2495
1514	NEGATIVE REGULATION OF PROTEIN LOCALIZATION TO CELL PERIPHERY%GOBP%GO:1904376	16	0.306266	0.93246	0.527027	0.782772	1	1202
1515	CELL CYCLE PHASE TRANSITION%GOBP%GO:0044770	110	0.200956	0.932332	0.628019	0.782603	1	2140
1516	SOMATIC DIVERSIFICATION OF IMMUNE RECEPTORS%GOBP%GO:0002200	16	0.310774	0.931772	0.560102	0.783597	1	853
1517	SUMOYLATION%REACTOME%R-HSA-2990846.4	78	0.208019	0.931525	0.58216	0.783729	1	1112
1518	PROTEIN LOCALIZATION TO ORGANELLE%GOBP%GO:0033365	367	0.173414	0.930568	0.846154	0.785841	1	1723
1519	SYNAPTIC SIGNALING PATHWAYS ASSOCIATED WITH AUTISM SPECTRUM DISORDER%WIKIPATHWAYS_20210210%WP4539%HOMO SAPIENS	19	0.297052	0.930376	0.549865	0.785799	1	2526
1520	REGULATION OF JNK CASCADE%GOBP%GO:0046328	50	0.23247	0.929609	0.567944	0.78733	1	794
1521	REGULATION OF MAST CELL ACTIVATION INVOLVED IN IMMUNE RESPONSE%GOBP%GO:0033006	16	0.316883	0.928634	0.543424	0.789513	1	1705
1522	REGULATION OF INTRACELLULAR PH%GOBP%GO:0051453	39	0.249094	0.927837	0.590062	0.791163	1	1913
1523	LPA RECEPTOR MEDIATED EVENTS%PATHWAY INTERACTION DATABASE NCI-NATURE CURATED DATA%LPA RECEPTOR MEDIATED EVENTS	45	0.235673	0.927649	0.579505	0.791159	1	2187
1524	POSITIVE REGULATION OF ION TRANSMEMBRANE TRANSPORTER ACTIVITY%GOBP%GO:0032414	34	0.259083	0.926749	0.569659	0.793152	1	1668
1525	ARF6 SIGNALING EVENTS%PATHWAY INTERACTION DATABASE NCI-NATURE CURATED DATA%ARF6 SIGNALING EVENTS	24	0.284714	0.926621	0.573864	0.792994	1	2161
1526	ESTROGEN-DEPENDENT GENE EXPRESSION%REACTOME%R-HSA-9018519.1	64	0.222818	0.926543	0.615702	0.792705	1	1800
1527	REGULATION OF CARBOHYDRATE METABOLIC PROCESS%GOBP%GO:0006109	79	0.208646	0.92649	0.6875	0.792333	1	1605
1528	SIGNALING BY SCF-KIT%REACTOME DATABASE ID RELEASE 75%1433557	22	0.286557	0.926474	0.550315	0.791852	1	604
1529	POSITIVE REGULATION OF ERBB SIGNALING PATHWAY%GOBP%GO:1901186	17	0.309763	0.924722	0.572973	0.796058	1	296
1530	WNT SIGNALING%WIKIPATHWAYS_20210210%WP428%HOMO SAPIENS	44	0.234883	0.924399	0.604167	0.796437	1	1033
1531	REGULATION OF ACTIN CYTOSKELETON ORGANIZATION%GOBP%GO:0032956	179	0.185504	0.924277	0.725191	0.796246	1	1049
1532	BIOCARTA_HER2_PATHWAY%MSIGDB_C2%BIOCARTA_HER2_PATHWAY	16	0.310917	0.924027	0.552846	0.79641	1	96
1533	EXTENSION OF TELOMERES%REACTOME DATABASE ID RELEASE 75%180786	31	0.265616	0.923985	0.581994	0.796012	1	1606
1534	ANTIGEN RECEPTOR-MEDIATED SIGNALING PATHWAY%GOBP%GO:0050851	118	0.193995	0.923191	0.746988	0.797667	1	991
1535	WOUND HEALING%GOBP%GO:0042060	241	0.177629	0.922982	0.75	0.797706	1	1204
1536	FAT CELL DIFFERENTIATION%GOBP%GO:0045444	15	0.314649	0.922608	0.585492	0.798207	1	584
1537	PID_FANCONI_PATHWAY%MSIGDB_C2%PID_FANCONI_PATHWAY	18	0.29434	0.922558	0.581197	0.797812	1	1606
1538	B CELL MEDIATED IMMUNITY%GOBP%GO:0019724	18	0.308946	0.92168	0.530504	0.799717	1	1200
1539	EGFR TYROSINE KINASE INHIBITOR RESISTANCE%WIKIPATHWAYS_20210210%WP4806%HOMO SAPIENS	55	0.220874	0.921589	0.655678	0.799431	1	1034
1540	MICROTUBULE CYTOSKELETON ORGANIZATION%GOBP%GO:0000226	218	0.178458	0.920954	0.793388	0.800611	1	1346
1541	COOPERATION OF PDCL (PHLP1) AND TRIC CCT IN G-PROTEIN BETA FOLDING%REACTOME DATABASE ID RELEASE 75%6814122	27	0.26824	0.920876	0.564103	0.800305	1	985
1542	REGULATION OF SECRETION BY CELL%GOBP%GO:1903530	174	0.184913	0.920854	0.722222	0.799839	1	1723
1543	NEGATIVE REGULATION OF INNATE IMMUNE RESPONSE%GOBP%GO:0045824	31	0.253573	0.920499	0.627219	0.800269	1	1380
1544	VISUAL SYSTEM DEVELOPMENT%GOBP%GO:0150063	62	0.219042	0.920104	0.623431	0.800755	1	1247
1545	SUMO E3 LIGASES SUMOYLATE TARGET PROTEINS%REACTOME%R-HSA-3108232.5	76	0.212267	0.919566	0.660099	0.801668	1	1112
1546	SEPARATION OF SISTER CHROMATIDS%REACTOME DATABASE ID RELEASE 75%2467813	119	0.198121	0.9194	0.693989	0.801598	1	2070
1547	DEFENSE RESPONSE TO GRAM-POSITIVE BACTERIUM%GOBP%GO:0050830	32	0.254858	0.915772	0.613559	0.811089	1	1177
1548	ESTABLISHMENT OF SPINDLE ORIENTATION%GOBP%GO:0051294	19	0.289649	0.915602	0.587571	0.811007	1	1978
1549	RESPONSE TO PEPTIDE HORMONE%GOBP%GO:0043434	120	0.196087	0.915208	0.70303	0.811471	1	798
1550	ORC1 REMOVAL FROM CHROMATIN%REACTOME%R-HSA-68949.3	58	0.220606	0.913964	0.643939	0.814288	1	2394
1551	SIGNALING EVENTS MEDIATED BY STEM CELL FACTOR RECEPTOR (C-KIT)%PATHWAY INTERACTION DATABASE NCI-NATURE CURATED DATA%SIGNALING EVENTS MEDIATED BY STEM CELL FACTOR RECEPTOR (C-KIT)	27	0.264622	0.913833	0.606557	0.814102	1	96
1552	REGULATION OF INTRINSIC APOPTOTIC SIGNALING PATHWAY%GOBP%GO:2001242	64	0.211465	0.913814	0.684825	0.813639	1	1650
1553	RIBOSOME ASSEMBLY%GOBP%GO:0042255	41	0.239454	0.913545	0.624585	0.81376	1	1573
1554	DEFENSE RESPONSE TO VIRUS%GOBP%GO:0051607	50	0.230493	0.913001	0.635714	0.814661	1	1227
1555	NEGATIVE REGULATION OF ERK1 AND ERK2 CASCADE%GOBP%GO:0070373	26	0.263714	0.91243	0.610795	0.81564	1	356
1556	REGULATION OF CELL GROWTH%GOBP%GO:0001558	159	0.187183	0.912386	0.713115	0.815248	1	1826
1557	REGULATION OF VASCULAR ENDOTHELIAL GROWTH FACTOR RECEPTOR SIGNALING PATHWAY%GOBP%GO:0030947	15	0.314279	0.912076	0.572519	0.815534	1	1689
1558	REGULATION OF DOUBLE-STRAND BREAK REPAIR%GOBP%GO:2000779	27	0.263325	0.910459	0.613924	0.819337	1	1441
1559	REGULATION OF MAPK CASCADE%GOBP%GO:0043408	239	0.17409	0.909408	0.784091	0.821562	1	1034
1560	CELL DEATH%GOBP%GO:0008219	291	0.172276	0.907587	0.851852	0.825702	1	1315
1561	RHO GTPASES ACTIVATE FORMINS%REACTOME%R-HSA-5663220.1	71	0.213225	0.906797	0.64876	0.827198	1	2070
1562	REGULATION OF ACTIN FILAMENT LENGTH%GOBP%GO:0030832	96	0.196547	0.906202	0.681319	0.828266	1	1049
1563	ANTIMICROBIAL HUMORAL IMMUNE RESPONSE MEDIATED BY ANTIMICROBIAL PEPTIDE%GOBP%GO:0061844	30	0.251161	0.906138	0.619469	0.827918	1	1242
1564	RESPONSE TO CYTOKINE%GOBP%GO:0034097	367	0.17357	0.906091	0.814815	0.827513	1	1028
1565	SIGNAL AMPLIFICATION%REACTOME DATABASE ID RELEASE 75%392518	20	0.28737	0.904927	0.588889	0.829987	1	438
1566	PID_KIT_PATHWAY%MSIGDB_C2%PID_KIT_PATHWAY	27	0.264622	0.904879	0.603834	0.829576	1	96
1567	DOWNSTREAM SIGNALING EVENTS OF B CELL RECEPTOR (BCR)%REACTOME DATABASE ID RELEASE 75%1168372	63	0.214707	0.903205	0.683128	0.833413	1	2945
1568	CIRCADIAN RHYTHM%GOBP%GO:0007623	33	0.248537	0.903012	0.607143	0.833348	1	1514
1569	REGULATION OF HETEROTYPIC CELL-CELL ADHESION%GOBP%GO:0034114	18	0.286519	0.902294	0.610028	0.834674	1	1330
1570	REGULATION OF PROTEIN STABILITY%GOBP%GO:0031647	148	0.185434	0.902103	0.769231	0.83464	1	1264
1571	REGULATION OF POTASSIUM ION TRANSMEMBRANE TRANSPORT%GOBP%GO:1901379	31	0.250941	0.901137	0.632836	0.836539	1	1269
1572	MICROTUBULE CYTOSKELETON ORGANIZATION INVOLVED IN MITOSIS%GOBP%GO:1902850	99	0.196616	0.900827	0.717822	0.836832	1	1991
1573	TRANSCRIPTION BY RNA POLYMERASE II%GOBP%GO:0006366	113	0.194955	0.90076	0.751445	0.836467	1	1916
1574	P75 NTR RECEPTOR-MEDIATED SIGNALLING%REACTOME%R-HSA-193704.1	42	0.234031	0.900121	0.648829	0.837607	1	1333
1575	PEPTIDE CATABOLIC PROCESS%GOBP%GO:0043171	19	0.290071	0.899995	0.598901	0.837385	1	154
1576	REGULATION OF SYNAPTIC PLASTICITY%GOBP%GO:0048167	45	0.227337	0.899257	0.69395	0.838757	1	737
1577	CELLULAR RESPONSE TO PEPTIDE%GOBP%GO:1901653	127	0.185503	0.898654	0.785714	0.839764	1	798
1578	REGULATION OF GENE SILENCING%GOBP%GO:0060968	77	0.208607	0.898416	0.666667	0.839821	1	2056
1579	KITRECEPTOR%NETPATH%KITRECEPTOR	63	0.213091	0.898325	0.702381	0.839556	1	1291
1580	TP53 REGULATES TRANSCRIPTION OF CELL DEATH GENES%REACTOME DATABASE ID RELEASE 75%5633008	18	0.290391	0.897976	0.633609	0.839922	1	1249
1581	THYMIC STROMAL LYMPHOPOIETIN (TSLP) SIGNALING PATHWAY%WIKIPATHWAYS_20210210%WP2203%HOMO SAPIENS	30	0.250866	0.897196	0.632153	0.841405	1	1333
1582	REGULATION OF PURINE NUCLEOTIDE BIOSYNTHETIC PROCESS%GOBP%GO:1900371	53	0.222189	0.896709	0.701887	0.842136	1	1605
1583	RNA POLYMERASE I TRANSCRIPTION INITIATION%REACTOME DATABASE ID RELEASE 75%73762	24	0.269805	0.896704	0.609231	0.841614	1	658
1584	COPPER HOMEOSTASIS%WIKIPATHWAYS_20210210%WP3286%HOMO SAPIENS	21	0.274454	0.895739	0.631579	0.843444	1	315
1585	RESPONSE TO TUMOR NECROSIS FACTOR%GOBP%GO:0034612	93	0.197265	0.893857	0.788018	0.847621	1	1280
1586	G ALPHA (12 13) SIGNALLING EVENTS%REACTOME%R-HSA-416482.5	34	0.245468	0.893607	0.688679	0.847702	1	1613
1587	INTRA-GOLGI VESICLE-MEDIATED TRANSPORT%GOBP%GO:0006891	25	0.266641	0.893034	0.639073	0.848628	1	1720
1588	FANCONI ANEMIA PATHWAY%PATHWAY INTERACTION DATABASE NCI-NATURE CURATED DATA%FANCONI ANEMIA PATHWAY	18	0.29434	0.892649	0.603306	0.849067	1	1606
1589	HEART DEVELOPMENT%GOBP%GO:0007507	101	0.195756	0.891512	0.730159	0.851317	1	1153
1590	NEGATIVE REGULATION OF CELLULAR CATABOLIC PROCESS%GOBP%GO:0031330	118	0.19213	0.890898	0.777778	0.852337	1	1774
1591	REGULATION OF ACTIN FILAMENT ORGANIZATION%GOBP%GO:0110053	140	0.186418	0.89088	0.765432	0.851847	1	1049
1592	CELLULAR MONOVALENT INORGANIC CATION HOMEOSTASIS%GOBP%GO:0030004	52	0.217398	0.889289	0.677043	0.855303	1	1723
1593	POTASSIUM ION HOMEOSTASIS%GOBP%GO:0055075	15	0.307155	0.889204	0.59383	0.85497	1	342
1594	BIOCARTA_AT1R_PATHWAY%MSIGDB_C2%BIOCARTA_AT1R_PATHWAY	19	0.2859	0.888739	0.638728	0.855634	1	341
1595	PRESENILIN ACTION IN NOTCH AND WNT SIGNALING%PATHWAY INTERACTION DATABASE NCI-NATURE CURATED DATA%PRESENILIN ACTION IN NOTCH AND WNT SIGNALING	20	0.276842	0.888627	0.615385	0.855423	1	1748
1596	SIGNALING OF HEPATOCYTE GROWTH FACTOR RECEPTOR%WIKIPATHWAYS_20210210%WP313%HOMO SAPIENS	26	0.261277	0.88786	0.654206	0.856735	1	1034
1597	COAGULATION%GOBP%GO:0050817	173	0.175239	0.887654	0.847328	0.856695	1	1742
1598	SENSORY SYSTEM DEVELOPMENT%GOBP%GO:0048880	64	0.215881	0.887013	0.648438	0.857804	1	1247
1599	PID_ERBB1_DOWNSTREAM_PATHWAY%MSIGDB_C2%PID_ERBB1_DOWNSTREAM_PATHWAY	69	0.204347	0.886698	0.715356	0.858077	1	1285
1600	PID_FOXO_PATHWAY%MSIGDB_C2%PID_FOXO_PATHWAY	27	0.256319	0.886343	0.643963	0.858501	1	1586
1601	PRE-NOTCH TRANSCRIPTION AND TRANSLATION%REACTOME%R-HSA-1912408.4	38	0.24093	0.886212	0.655518	0.858314	1	952
1602	NRAGE SIGNALS DEATH THROUGH JNK%REACTOME DATABASE ID RELEASE 75%193648	20	0.276137	0.885811	0.635838	0.858744	1	1868
1603	GENES INVOLVED IN MALE INFERTILITY%WIKIPATHWAYS_20210210%WP4673%HOMO SAPIENS	54	0.213275	0.885222	0.72119	0.859697	1	1249
1604	ANDROGENRECEPTOR%IOB%ANDROGENRECEPTOR	66	0.209225	0.885058	0.683594	0.85958	1	1419
1605	PROTEIN POLYUBIQUITINATION%GOBP%GO:0000209	130	0.181736	0.883737	0.825503	0.862405	1	1864
1606	RESPONSE TO MECHANICAL STIMULUS%GOBP%GO:0009612	43	0.229998	0.883558	0.676923	0.862317	1	1565
1607	FOXO FAMILY SIGNALING%PATHWAY INTERACTION DATABASE NCI-NATURE CURATED DATA%FOXO FAMILY SIGNALING	27	0.25632	0.88346	0.65942	0.862059	1	1586
1608	GENES CONTROLLING NEPHROGENESIS%WIKIPATHWAYS_20210210%WP4823%HOMO SAPIENS	21	0.274801	0.882923	0.668508	0.862841	1	445
1609	ENDOTHELINS%PATHWAY INTERACTION DATABASE NCI-NATURE CURATED DATA%ENDOTHELINS	42	0.228448	0.882144	0.701695	0.864234	1	1037
1610	MITOTIC SPINDLE CHECKPOINT%REACTOME%R-HSA-69618.2	66	0.209263	0.882076	0.731061	0.863848	1	2070
1611	METABOTROPIC GLUTAMATE RECEPTOR GROUP III PATHWAY%PANTHER PATHWAY%P00039	25	0.256883	0.881817	0.660551	0.86397	1	678
1612	REGULATION OF AMYLOID-BETA FORMATION%GOBP%GO:1902003	20	0.276639	0.881595	0.600583	0.864002	1	312
1613	GENE SILENCING%GOBP%GO:0016458	70	0.204609	0.881357	0.748971	0.86406	1	1204
1614	REGULATION OF MEMBRANE PERMEABILITY%GOBP%GO:0090559	35	0.239188	0.881181	0.694444	0.863977	1	1543
1615	HEART VALVE MORPHOGENESIS%GOBP%GO:0003179	18	0.280271	0.881179	0.60733	0.863445	1	595
1616	CD40 CD40L SIGNALING%PATHWAY INTERACTION DATABASE NCI-NATURE CURATED DATA%CD40 CD40L SIGNALING	17	0.298542	0.879631	0.618497	0.866662	1	1333
1617	TRANSCRIPTION-COUPLED NUCLEOTIDE-EXCISION REPAIR%GOBP%GO:0006283	54	0.216505	0.879389	0.713178	0.866715	1	1803
1618	REGULATION OF EPITHELIAL CELL MIGRATION%GOBP%GO:0010632	125	0.183576	0.879301	0.835294	0.866396	1	1264
1619	MITOTIC CELL CYCLE CHECKPOINT%GOBP%GO:0007093	53	0.219282	0.878904	0.709559	0.866886	1	1342
1620	CELL PROLIFERATION%GOBP%GO:0008283	96	0.196703	0.877595	0.832512	0.869542	1	1247
1621	REGULATION OF CELLULAR RESPONSE TO OXIDATIVE STRESS%GOBP%GO:1900407	31	0.248802	0.876969	0.69279	0.870554	1	1173
1622	GASTRIC CANCER NETWORK 2%WIKIPATHWAYS_20210210%WP2363%HOMO SAPIENS	18	0.28543	0.876145	0.645251	0.87205	1	1664
1623	P38 MAPK SIGNALING PATHWAY%WIKIPATHWAYS_20210210%WP400%HOMO SAPIENS	17	0.285157	0.873934	0.660428	0.876847	1	341
1624	REGULATION OF ACTIN FILAMENT POLYMERIZATION%GOBP%GO:0030833	85	0.193098	0.873696	0.77533	0.876887	1	1049
1625	CARBOHYDRATE DERIVATIVE TRANSPORT%GOBP%GO:1901264	23	0.263235	0.873254	0.674931	0.877374	1	1508
1626	HALLMARK_ESTROGEN_RESPONSE_LATE%MSIGDB_C2%HALLMARK_ESTROGEN_RESPONSE_LATE	105	0.188119	0.873076	0.819149	0.877272	1	1338
1627	PID_PS1_PATHWAY%MSIGDB_C2%PID_PS1_PATHWAY	20	0.276842	0.873072	0.645503	0.876738	1	1748
1628	AGGREPHAGY%REACTOME%R-HSA-9646399.3	18	0.284979	0.872294	0.639118	0.878058	1	2279
1629	NEGATIVE REGULATION OF LEUKOCYTE MEDIATED IMMUNITY%GOBP%GO:0002704	16	0.289606	0.87168	0.680217	0.878994	1	818
1630	REGULATION OF MITOTIC METAPHASE/ANAPHASE TRANSITION%GOBP%GO:0030071	28	0.246383	0.871626	0.699088	0.878557	1	1884
1631	POSITIVE REGULATION OF PROTEIN LOCALIZATION TO CELL PERIPHERY%GOBP%GO:1904377	36	0.239788	0.871506	0.688312	0.878289	1	1868
1632	POSITIVE REGULATION OF PEPTIDASE ACTIVITY%GOBP%GO:0010952	83	0.198235	0.871009	0.818182	0.878926	1	1582
1633	POSITIVE REGULATION OF CYTOSKELETON ORGANIZATION%GOBP%GO:0051495	112	0.18917	0.870968	0.820652	0.878488	1	1724
1634	FEMALE SEX DIFFERENTIATION%GOBP%GO:0046660	16	0.294201	0.870377	0.632877	0.879361	1	453
1635	GOLGI-TO-ER RETROGRADE TRANSPORT%REACTOME%R-HSA-8856688.1	82	0.198516	0.870007	0.785366	0.879651	1	2037
1636	REGULATION OF TRANSLATION%GOBP%GO:0006417	166	0.176218	0.869113	0.868421	0.881242	1	1573
1637	POSITIVE REGULATION OF JUN KINASE ACTIVITY%GOBP%GO:0043507	17	0.286499	0.869037	0.616967	0.880867	1	1032
1638	ERBB1 DOWNSTREAM SIGNALING%PATHWAY INTERACTION DATABASE NCI-NATURE CURATED DATA%ERBB1 DOWNSTREAM SIGNALING	69	0.204347	0.868531	0.747899	0.881466	1	1285
1639	POSITIVE REGULATION OF MAP KINASE ACTIVITY%GOBP%GO:0043406	86	0.194613	0.866625	0.781818	0.885383	1	1034
1640	VESICLE LOCALIZATION%GOBP%GO:0051648	134	0.180138	0.866225	0.867647	0.88572	1	1671
1641	CARDIAC MUSCLE CELL DIFFERENTIATION%GOBP%GO:0055007	15	0.292919	0.866218	0.653646	0.885197	1	200
1642	POSITIVE REGULATION OF PROTEIN LOCALIZATION TO PLASMA MEMBRANE%GOBP%GO:1903078	32	0.236191	0.865502	0.705521	0.886287	1	1868
1643	POSTTRANSCRIPTIONAL REGULATION OF GENE EXPRESSION%GOBP%GO:0010608	278	0.16357	0.865484	0.944444	0.885771	1	2460
1644	ACTIVATION OF ANTERIOR HOX GENES IN HINDBRAIN DEVELOPMENT DURING EARLY EMBRYOGENESIS%REACTOME%R-HSA-5617472.2	50	0.215901	0.865471	0.752688	0.885267	1	1051
1645	TGF-BETA RECEPTOR SIGNALING%WIKIPATHWAYS_20210210%WP560%HOMO SAPIENS	27	0.250051	0.865417	0.693498	0.884856	1	2280
1646	EXTRACELLULAR VESICLE-MEDIATED SIGNALING IN RECIPIENT CELLS%WIKIPATHWAYS_20210210%WP2870%HOMO SAPIENS	21	0.268375	0.865272	0.664723	0.88464	1	347
1647	SENESCENCE AND AUTOPHAGY IN CANCER%WIKIPATHWAYS_20210210%WP615%HOMO SAPIENS	56	0.209653	0.865184	0.763441	0.884297	1	1764
1648	MEIOSIS I CELL CYCLE PROCESS%GOBP%GO:0061982	18	0.278	0.865087	0.662304	0.884013	1	904
1649	ACUTE INFLAMMATORY RESPONSE%GOBP%GO:0002526	18	0.280652	0.86506	0.65625	0.883543	1	972
1650	DEACTIVATION OF THE BETA-CATENIN TRANSACTIVATING COMPLEX%REACTOME DATABASE ID RELEASE 75%3769402	15	0.289601	0.864027	0.644737	0.885307	1	2533
1651	REGULATION OF UBIQUITIN-DEPENDENT PROTEIN CATABOLIC PROCESS%GOBP%GO:2000058	71	0.203751	0.863533	0.776471	0.885865	1	1650
1652	PID_NOTCH_PATHWAY%MSIGDB_C2%PID_NOTCH_PATHWAY	31	0.242234	0.861763	0.739521	0.889294	1	1772
1653	HEDGEHOG 'OFF' STATE%REACTOME%R-HSA-5610787.1	68	0.200066	0.86146	0.761317	0.889486	1	2279
1654	REGUCALCIN IN PROXIMAL TUBULE EPITHELIAL KIDNEY CELLS%WIKIPATHWAYS_20210210%WP4838%HOMO SAPIENS	18	0.278835	0.861402	0.662921	0.889089	1	2437
1655	BIOCARTA_PYK2_PATHWAY%MSIGDB_C2%BIOCARTA_PYK2_PATHWAY	22	0.263276	0.86096	0.69914	0.889596	1	1034
1656	NEGATIVE REGULATION OF CATION CHANNEL ACTIVITY%GOBP%GO:2001258	15	0.288381	0.860532	0.687332	0.890041	1	1789
1657	PID_ENDOTHELIN_PATHWAY%MSIGDB_C2%PID_ENDOTHELIN_PATHWAY	43	0.216637	0.860441	0.746795	0.8897	1	1037
1658	RESPONSE TO WOUNDING%GOBP%GO:0009611	259	0.164603	0.860286	0.932584	0.889528	1	1204
1659	ACTIVATION OF HOX GENES DURING DIFFERENTIATION%REACTOME%R-HSA-5619507.3	50	0.215901	0.859604	0.732203	0.890555	1	1051
1660	BIOCARTA_P38MAPK_PATHWAY%MSIGDB_C2%BIOCARTA_P38MAPK_PATHWAY	18	0.281143	0.859256	0.643478	0.890822	1	341
1661	SEX DIFFERENTIATION%GOBP%GO:0007548	30	0.244932	0.858474	0.684049	0.892009	1	1086
1662	HEART VALVE DEVELOPMENT%GOBP%GO:0003170	20	0.270415	0.858306	0.71261	0.89187	1	595
1663	VITAMIN D-SENSITIVE CALCIUM SIGNALING IN DEPRESSION%WIKIPATHWAYS_20210210%WP4698%HOMO SAPIENS	16	0.288084	0.85798	0.67561	0.892098	1	1758
1664	REGULATION OF CELLULAR PROTEIN CATABOLIC PROCESS%GOBP%GO:1903362	113	0.18484	0.856059	0.852041	0.895908	1	1291
1665	MUCOSAL IMMUNE RESPONSE%GOBP%GO:0002385	15	0.295932	0.855574	0.689474	0.896402	1	91
1666	AXON GUIDANCE MEDIATED BY SEMAPHORINS%PANTHER PATHWAY%P00007	16	0.284184	0.85527	0.651163	0.896533	1	121
1667	KISSPEPTIN/KISSPEPTIN RECEPTOR SYSTEM IN THE OVARY%WIKIPATHWAYS_20210210%WP4871%HOMO SAPIENS	24	0.253381	0.85512	0.696532	0.896322	1	1412
1668	TRANSEPITHELIAL TRANSPORT%GOBP%GO:0070633	15	0.291163	0.855056	0.69589	0.895941	1	2168
1669	FC-EPSILON RECEPTOR SIGNALING PATHWAY%GOBP%GO:0038095	84	0.19502	0.854598	0.807339	0.896387	1	2187
1670	HISTONE MONOUBIQUITINATION%GOBP%GO:0010390	16	0.285661	0.854107	0.661616	0.896953	1	1916
1671	PLASMA MEMBRANE ORGANIZATION%GOBP%GO:0007009	45	0.217029	0.854003	0.745223	0.896629	1	709
1672	NEGATIVE REGULATION OF SMOOTH MUSCLE CELL PROLIFERATION%GOBP%GO:0048662	15	0.291855	0.853831	0.65285	0.896468	1	1001
1673	REGULATION OF METAPHASE/ANAPHASE TRANSITION OF CELL CYCLE%GOBP%GO:1902099	28	0.246383	0.853803	0.70625	0.896002	1	1884
1674	FOREBRAIN DEVELOPMENT%GOBP%GO:0030900	59	0.2063	0.853052	0.811538	0.897157	1	1687
1675	REGULATION OF MITOTIC SISTER CHROMATID SEPARATION%GOBP%GO:0010965	30	0.237509	0.852732	0.726744	0.897323	1	1884
1676	PID_RET_PATHWAY%MSIGDB_C2%PID_RET_PATHWAY	25	0.24691	0.851392	0.730435	0.899675	1	689
1677	PROGRAMMED CELL DEATH%GOBP%GO:0012501	274	0.16284	0.850888	0.97619	0.900213	1	1315
1678	PDGF PATHWAY%WIKIPATHWAYS_20210210%WP2526%HOMO SAPIENS	29	0.239451	0.85054	0.708978	0.900432	1	341
1679	RESPONSE TO NUTRIENT%GOBP%GO:0007584	17	0.285248	0.850539	0.681948	0.899898	1	258
1680	POST NMDA RECEPTOR ACTIVATION EVENTS%REACTOME DATABASE ID RELEASE 75%438064	28	0.237248	0.849357	0.730556	0.901928	1	2337
1681	STEM CELL PROLIFERATION%GOBP%GO:0072089	16	0.291763	0.848772	0.684896	0.902669	1	529
1682	INFLAMMATORY RESPONSE PATHWAY%WIKIPATHWAYS_20210210%WP453%HOMO SAPIENS	15	0.293772	0.848166	0.643979	0.90343	1	1499
1683	REGULATION OF POTASSIUM ION TRANSPORT%GOBP%GO:0043266	33	0.234768	0.847702	0.71875	0.903858	1	576
1684	SUBSTRATE ADHESION-DEPENDENT CELL SPREADING%GOBP%GO:0034446	33	0.232009	0.84745	0.765273	0.903846	1	777
1685	REGULATION OF DEFENSE RESPONSE TO VIRUS BY VIRUS%GOBP%GO:0050690	23	0.262634	0.847435	0.705056	0.903348	1	602
1686	REGULATION OF MICROTUBULE DEPOLYMERIZATION%GOBP%GO:0031114	15	0.285753	0.846682	0.68435	0.904445	1	1224
1687	PHAGOSOME ACIDIFICATION%GOBP%GO:0090383	20	0.263876	0.846668	0.681682	0.903941	1	2440
1688	C-TYPE LECTIN RECEPTORS (CLRS)%REACTOME DATABASE ID RELEASE 75%5621481	97	0.183952	0.845862	0.881188	0.905179	1	275
1689	GASTRULATION%GOBP%GO:0007369	40	0.220038	0.845101	0.768166	0.906218	1	2474
1690	SIGNALING BY NTRK1 (TRKA)%REACTOME%R-HSA-187037.2	55	0.20792	0.844974	0.779026	0.905972	1	1162
1691	REGULATION OF ATP METABOLIC PROCESS%GOBP%GO:1903578	59	0.203466	0.844758	0.779116	0.905894	1	1605
1692	POSITIVE REGULATION OF CELL-MATRIX ADHESION%GOBP%GO:0001954	30	0.244807	0.844574	0.752412	0.905766	1	2330
1693	TRANSCRIPTIONAL REGULATION BY THE AP-2 (TFAP2) FAMILY OF TRANSCRIPTION FACTORS%REACTOME%R-HSA-8864260.3	15	0.287144	0.843981	0.635417	0.906461	1	1915
1694	POSITIVE REGULATION OF SUPRAMOLECULAR FIBER ORGANIZATION%GOBP%GO:1902905	105	0.182745	0.843359	0.9	0.907273	1	1724
1695	REGULATION OF PROTEOLYSIS INVOLVED IN CELLULAR PROTEIN CATABOLIC PROCESS%GOBP%GO:1903050	96	0.18696	0.841509	0.864078	0.910742	1	1291
1696	EXTRINSIC APOPTOTIC SIGNALING PATHWAY%GOBP%GO:0097191	30	0.236402	0.841305	0.739377	0.910655	1	1291
1697	DEVELOPMENTAL MATURATION%GOBP%GO:0021700	45	0.215383	0.841221	0.784127	0.910292	1	1156
1698	PHOSPHATIDYLCHOLINE BIOSYNTHETIC PROCESS%GOBP%GO:0006656	16	0.277706	0.840771	0.715054	0.910648	1	1127
1699	GOLGI ASSOCIATED VESICLE BIOGENESIS%REACTOME%R-HSA-432722.3	44	0.215794	0.84023	0.764259	0.91123	1	1610
1700	NEUROTRANSMITTER RECEPTORS AND POSTSYNAPTIC SIGNAL TRANSMISSION%REACTOME DATABASE ID RELEASE 75%112314	64	0.198979	0.839458	0.799213	0.912264	1	1738
1701	HUNTINGTON DISEASE%PANTHER PATHWAY%P00029	77	0.189822	0.839127	0.864253	0.912365	1	2332
1702	DIRECT P53 EFFECTORS%PATHWAY INTERACTION DATABASE NCI-NATURE CURATED DATA%DIRECT P53 EFFECTORS	62	0.197315	0.838985	0.804979	0.912134	1	1795
1703	POSITIVE REGULATION OF PROTEIN IMPORT%GOBP%GO:1904591	19	0.268607	0.837569	0.715426	0.914559	1	1045
1704	SIGNALING BY NOTCH3%REACTOME%R-HSA-9012852.2	20	0.268313	0.837094	0.738602	0.914966	1	752
1705	GLUTATHIONE CONJUGATION%REACTOME DATABASE ID RELEASE 75%156590	28	0.235323	0.836467	0.754986	0.915704	1	1526
1706	NOTCH SIGNALING PATHWAY%PATHWAY INTERACTION DATABASE NCI-NATURE CURATED DATA%NOTCH SIGNALING PATHWAY	30	0.2317	0.835271	0.729452	0.917676	1	1772
1707	CELL CYCLE ARREST%GOBP%GO:0007050	45	0.212086	0.834607	0.769231	0.91851	1	599
1708	MRNA DESTABILIZATION%GOBP%GO:0061157	18	0.270902	0.834262	0.699482	0.918632	1	1098
1709	DEGRADATION OF GLI2 BY THE PROTEASOME%REACTOME DATABASE ID RELEASE 75%5610783	53	0.204679	0.833369	0.813492	0.919911	1	2943
1710	PID_P53_DOWNSTREAM_PATHWAY%MSIGDB_C2%PID_P53_DOWNSTREAM_PATHWAY	61	0.199722	0.832195	0.814672	0.921741	1	1795
1711	DNA DAMAGE RESPONSE (ONLY ATM DEPENDENT)%WIKIPATHWAYS_20210210%WP710%HOMO SAPIENS	46	0.21219	0.831692	0.819853	0.92217	1	575
1712	REGULATION OF HISTONE METHYLATION%GOBP%GO:0031060	22	0.24822	0.83153	0.726471	0.921934	1	2244
1713	RECEPTOR-MEDIATED ENDOCYTOSIS%GOBP%GO:0006898	109	0.179618	0.8306	0.902174	0.923247	1	1267
1714	HALLMARK_UNFOLDED_PROTEIN_RESPONSE%MSIGDB_C2%HALLMARK_UNFOLDED_PROTEIN_RESPONSE	77	0.19189	0.830167	0.863454	0.923581	1	1222
1715	LKB1 SIGNALING EVENTS%PATHWAY INTERACTION DATABASE NCI-NATURE CURATED DATA%LKB1 SIGNALING EVENTS	25	0.246518	0.829178	0.741433	0.92506	1	1998
1716	METABOLISM OF POLYAMINES%REACTOME DATABASE ID RELEASE 75%351202	46	0.211005	0.828561	0.802048	0.925862	1	2943
1717	CELLULAR RESPONSE TO ORGANONITROGEN COMPOUND%GOBP%GO:0071417	190	0.164987	0.828407	0.940678	0.925615	1	1620
1718	CELLULAR RESPONSE TO INTERLEUKIN-1%GOBP%GO:0071347	81	0.184708	0.828252	0.892	0.925382	1	2187
1719	KINESINS%REACTOME%R-HSA-983189.3	21	0.254786	0.827638	0.742775	0.926103	1	580
1720	REGULATION OF IGF ACTIVITY BY IGFBP%REACTOME%R-HSA-381426.2	103	0.180974	0.826524	0.920188	0.92772	1	1327
1721	INOSITOL PHOSPHATE METABOLIC PROCESS%GOBP%GO:0043647	23	0.254583	0.826285	0.751462	0.927662	1	1529
1722	TNFR2 NON-CANONICAL NF-KB PATHWAY%REACTOME DATABASE ID RELEASE 75%5668541	55	0.197876	0.826258	0.84058	0.927167	1	2160
1723	PID_NCADHERIN_PATHWAY%MSIGDB_C2%PID_NCADHERIN_PATHWAY	27	0.240438	0.826204	0.767507	0.926733	1	2467
1724	GO ID NOT FOUND IN OBO FILE ONTOLOGY DEFINITIONS%GOBP%GO:0150104	48	0.210521	0.826134	0.788321	0.926334	1	1213
1725	HALLMARK_MYC_TARGETS_V1%MSIGDB_C2%HALLMARK_MYC_TARGETS_V1	191	0.166686	0.825467	0.953488	0.927079	1	2345
1726	POST-TRANSLATIONAL PROTEIN PHOSPHORYLATION%REACTOME DATABASE ID RELEASE 75%8957275	88	0.182208	0.825337	0.894495	0.926783	1	1565
1727	NEUROTRANSMITTER TRANSPORT%GOBP%GO:0006836	72	0.190226	0.823297	0.863436	0.930194	1	954
1728	GABA-B_RECEPTOR_II_SIGNALING%PANTHER PATHWAY%P05731	19	0.260533	0.823179	0.728358	0.929885	1	574
1729	APOPTOSIS%WIKIPATHWAYS_20210210%WP254%HOMO SAPIENS	31	0.228711	0.821805	0.789474	0.932032	1	579
1730	VEGFA-VEGFR2 PATHWAY%REACTOME DATABASE ID RELEASE 75%4420097	70	0.190378	0.821425	0.857798	0.93222	1	705
1731	REGULATION OF RECEPTOR-MEDIATED ENDOCYTOSIS%GOBP%GO:0048259	55	0.203386	0.82092	0.869888	0.932626	1	406
1732	EPITHELIAL CELL DEVELOPMENT%GOBP%GO:0002064	56	0.196715	0.820791	0.844697	0.932319	1	1722
1733	N-CADHERIN SIGNALING EVENTS%PATHWAY INTERACTION DATABASE NCI-NATURE CURATED DATA%N-CADHERIN SIGNALING EVENTS	27	0.240438	0.820735	0.750779	0.931894	1	2467
1734	FC RECEPTOR SIGNALING PATHWAY%GOBP%GO:0038093	127	0.169682	0.82057	0.911392	0.931646	1	1274
1735	TOLL LIKE RECEPTOR 3 (TLR3) CASCADE%REACTOME%R-HSA-168164.3	46	0.210521	0.820498	0.817857	0.931239	1	603
1736	ABERRANT REGULATION OF MITOTIC CELL CYCLE DUE TO RB1 DEFECTS%REACTOME%R-HSA-9687139.2	15	0.276755	0.819616	0.735795	0.93235	1	1817
1737	GLI3 IS PROCESSED TO GLI3R BY THE PROTEASOME%REACTOME DATABASE ID RELEASE 75%5610785	53	0.204679	0.819519	0.835088	0.931994	1	2943
1738	PID_EPO_PATHWAY%MSIGDB_C2%PID_EPO_PATHWAY	23	0.25045	0.819316	0.741641	0.931843	1	1376
1739	TUMOR NECROSIS FACTOR-MEDIATED SIGNALING PATHWAY%GOBP%GO:0033209	62	0.193882	0.818647	0.836653	0.932586	1	2187
1740	REGULATION OF AXON EXTENSION%GOBP%GO:0030516	38	0.217023	0.818508	0.805825	0.932304	1	1419
1741	OXYGEN-DEPENDENT PROLINE HYDROXYLATION OF HYPOXIA-INDUCIBLE FACTOR ALPHA%REACTOME%R-HSA-1234176.2	54	0.20269	0.817747	0.895131	0.933244	1	2943
1742	SYNAPTIC VESICLE PATHWAY%WIKIPATHWAYS_20210210%WP2267%HOMO SAPIENS	28	0.232607	0.816591	0.758621	0.934943	1	678
1743	INTEGRIN-MEDIATED SIGNALING PATHWAY%GOBP%GO:0007229	59	0.196751	0.815613	0.850746	0.93621	1	2405
1744	REGULATION OF EXTENT OF CELL GROWTH%GOBP%GO:0061387	39	0.212797	0.815097	0.789062	0.936643	1	1419
1745	NUCLEOTIDE EXCISION REPAIR%WIKIPATHWAYS_20210210%WP4753%HOMO SAPIENS	26	0.23489	0.815012	0.762195	0.936279	1	1617
1746	RESPONSE TO INTERLEUKIN-12%GOBP%GO:0070671	39	0.213662	0.814824	0.818482	0.936091	1	770
1747	CELLULAR RESPONSE TO UV%GOBP%GO:0034644	41	0.215316	0.814765	0.808511	0.935654	1	1232
1748	IMMUNOGLOBULIN MEDIATED IMMUNE RESPONSE%GOBP%GO:0016064	16	0.275421	0.814041	0.727273	0.936399	1	853
1749	REGULATION OF ACTIN POLYMERIZATION OR DEPOLYMERIZATION%GOBP%GO:0008064	95	0.180246	0.813704	0.917949	0.936486	1	1049
1750	B CELL ACTIVATION%REACTOME DATABASE ID RELEASE 75%983705	78	0.18645	0.813303	0.896104	0.936709	1	2567
1751	G ALPHA (Z) SIGNALLING EVENTS%REACTOME DATABASE ID RELEASE 75%418597	27	0.237368	0.813113	0.740525	0.936547	1	1031
1752	CELLULAR RESPONSE TO LIGHT STIMULUS%GOBP%GO:0071482	43	0.208391	0.809987	0.83209	0.941674	1	1232
1753	DEPHOSPHORYLATION%GOBP%GO:0016311	92	0.179481	0.809832	0.889423	0.941414	1	1286
1754	POSTMITOTIC NUCLEAR PORE COMPLEX (NPC) REFORMATION%REACTOME DATABASE ID RELEASE 75%9615933	21	0.252098	0.809661	0.763231	0.941197	1	1178
1755	HISTONE UBIQUITINATION%GOBP%GO:0016574	20	0.250113	0.808626	0.780161	0.942493	1	1916
1756	CELLULAR RESPONSE TO INTERLEUKIN-12%GOBP%GO:0071349	39	0.213662	0.808189	0.811688	0.942762	1	770
1757	PROTEIN PEPTIDYL-PROLYL ISOMERIZATION%GOBP%GO:0000413	18	0.258945	0.807303	0.771605	0.943847	1	1536
1758	POSITIVE REGULATION OF EPITHELIAL TO MESENCHYMAL TRANSITION%GOBP%GO:0010718	25	0.242238	0.806368	0.759146	0.945015	1	1544
1759	CELLULAR RESPONSE TO NITROGEN COMPOUND%GOBP%GO:1901699	221	0.156533	0.80611	0.97	0.944916	1	1620
1760	HEMOSTASIS%GOBP%GO:0007599	172	0.162301	0.805886	0.977099	0.94477	1	1742
1761	REGULATION OF CELL CYCLE G1/S PHASE TRANSITION%GOBP%GO:1902806	63	0.192014	0.805548	0.853557	0.944857	1	1664
1762	VEGFA-VEGFR2 SIGNALING PATHWAY%WIKIPATHWAYS_20210210%WP3888%HOMO SAPIENS	310	0.151982	0.805375	1	0.94462	1	1306
1763	I-KAPPAB KINASE/NF-KAPPAB SIGNALING%GOBP%GO:0007249	21	0.25487	0.8051	0.784946	0.944574	1	275
1764	REGULATION OF STEM CELL PROLIFERATION%GOBP%GO:0072091	17	0.273138	0.804645	0.753968	0.944868	1	1544
1765	NEGATIVE REGULATION OF CHROMOSOME SEGREGATION%GOBP%GO:0051985	15	0.271968	0.804334	0.758333	0.944874	1	575
1766	SIGNALING BY FGFR4%REACTOME DATABASE ID RELEASE 75%5654743	18	0.257785	0.804309	0.744125	0.94439	1	991
1767	REGULATION OF STRESS-ACTIVATED MAPK CASCADE%GOBP%GO:0032872	73	0.185979	0.803804	0.895582	0.944758	1	794
1768	MODIFICATION OF MORPHOLOGY OR PHYSIOLOGY OF OTHER ORGANISM INVOLVED IN SYMBIOTIC INTERACTION%GOBP%GO:0051817	74	0.186123	0.803709	0.899598	0.944405	1	1369
1769	EPO RECEPTOR SIGNALING%WIKIPATHWAYS_20210210%WP581%HOMO SAPIENS	17	0.263183	0.803461	0.73842	0.944292	1	1376
1770	REGULATION OF NUCLEOTIDE BIOSYNTHETIC PROCESS%GOBP%GO:0030808	54	0.198227	0.803019	0.878788	0.944496	1	1605
1771	POSITIVE REGULATION OF CELL CYCLE PHASE TRANSITION%GOBP%GO:1901989	35	0.219796	0.801134	0.81759	0.947242	1	1916
1772	SIGNALING BY FGFR%REACTOME%R-HSA-190236.2	44	0.205361	0.800435	0.846939	0.947851	1	1408
1773	DNA STRAND ELONGATION%GOBP%GO:0022616	19	0.253118	0.799953	0.762402	0.948108	1	1836
1774	LEUKOCYTE MEDIATED IMMUNITY%GOBP%GO:0002443	433	0.148394	0.799827	1	0.94781	1	1743
1775	REGULATION OF PROTEASOMAL PROTEIN CATABOLIC PROCESS%GOBP%GO:0061136	81	0.181111	0.799411	0.925439	0.94804	1	1291
1776	REGULATION OF RAS BY GAPS%REACTOME DATABASE ID RELEASE 75%5658442	54	0.196629	0.798291	0.860714	0.949409	1	2943
1777	DNA REPLICATION%GOBP%GO:0006260	116	0.169215	0.798143	0.949749	0.949153	1	2062
1778	REGULATION OF SODIUM ION TRANSMEMBRANE TRANSPORT%GOBP%GO:1902305	29	0.227715	0.796921	0.814697	0.95066	1	1201
1779	APOPTOSIS%REACTOME%R-HSA-109581.3	130	0.170216	0.795844	0.93125	0.951894	1	1828
1780	VIRAL ENTRY INTO HOST CELL%GOBP%GO:0046718	24	0.237938	0.795442	0.797619	0.952021	1	2129
1781	NEGATIVE REGULATION OF MITOTIC CELL CYCLE PHASE TRANSITION%GOBP%GO:1901991	107	0.175154	0.795374	0.956989	0.951609	1	1711
1782	CELLULAR MODIFIED AMINO ACID BIOSYNTHETIC PROCESS%GOBP%GO:0042398	23	0.237747	0.795359	0.776812	0.951098	1	303
1783	REGULATION OF CALCIUM ION TRANSPORT INTO CYTOSOL%GOBP%GO:0010522	27	0.228682	0.795165	0.809659	0.950939	1	1736
1784	SIGNALING BY FGFR3%REACTOME%R-HSA-5654741.2	18	0.257785	0.794896	0.755287	0.950843	1	991
1785	LEUKOCYTE MEDIATED CYTOTOXICITY%GOBP%GO:0001909	15	0.274404	0.794747	0.753281	0.950535	1	4697
1786	PNAT%PANTHER PATHWAY%P05912	34	0.216294	0.79459	0.844885	0.950246	1	1569
1787	EPO SIGNALING PATHWAY%PATHWAY INTERACTION DATABASE NCI-NATURE CURATED DATA%EPO SIGNALING PATHWAY	24	0.239646	0.794554	0.785714	0.949771	1	1376
1788	REGULATION OF MITOTIC CELL CYCLE PHASE TRANSITION%GOBP%GO:1901990	191	0.156209	0.793877	0.97479	0.950313	1	2062
1789	NEGATIVE REGULATION OF SISTER CHROMATID SEGREGATION%GOBP%GO:0033046	15	0.271968	0.792932	0.744565	0.951336	1	575
1790	SCF(SKP2)-MEDIATED DEGRADATION OF P27 P21%REACTOME DATABASE ID RELEASE 75%187577	48	0.20061	0.791552	0.872659	0.953002	1	2943
1791	BLOOD COAGULATION%GOBP%GO:0007596	171	0.162535	0.791285	0.992126	0.952898	1	1742
1792	NEGATIVE REGULATION OF MITOTIC SISTER CHROMATID SEGREGATION%GOBP%GO:0033048	15	0.271968	0.790784	0.734247	0.953231	1	575
1793	GLUTATHIONE-MEDIATED DETOXIFICATION I%HUMANCYC%PWY-4061	19	0.25318	0.787747	0.787234	0.957651	1	1526
1794	NEGATIVE REGULATION OF MITOTIC CELL CYCLE%GOBP%GO:0045930	125	0.163776	0.787462	0.960894	0.957565	1	1711
1795	BIOCARTA_FAS_PATHWAY%MSIGDB_C2%BIOCARTA_FAS_PATHWAY	19	0.248616	0.786142	0.777494	0.959117	1	1315
1796	THE OVERLAP BETWEEN SIGNAL TRANSDUCTION PATHWAYS THAT CONTRIBUTE TO A RANGE OF LMNA LAMINOPATHIES%WIKIPATHWAYS_20210210%WP4879%HOMO SAPIENS	25	0.231663	0.785578	0.808333	0.959481	1	1291
1797	PID_IL6_7_PATHWAY%MSIGDB_C2%PID_IL6_7_PATHWAY	26	0.230949	0.783818	0.843666	0.961707	1	705
1798	ENDOTHELIAL CELL DEVELOPMENT%GOBP%GO:0001885	30	0.217873	0.782927	0.798701	0.962572	1	1722
1799	IL6-MEDIATED SIGNALING EVENTS%PATHWAY INTERACTION DATABASE NCI-NATURE CURATED DATA%IL6-MEDIATED SIGNALING EVENTS	26	0.230949	0.782764	0.829412	0.962284	1	705
1800	CROSS-PRESENTATION OF SOLUBLE EXOGENOUS ANTIGENS (ENDOSOMES)%REACTOME DATABASE ID RELEASE 75%1236978	45	0.198511	0.782464	0.903346	0.962182	1	2943
1801	DETOXIFICATION%GOBP%GO:0098754	22	0.238872	0.780457	0.821333	0.964756	1	1331
1802	PID_CXCR3_PATHWAY%MSIGDB_C2%PID_CXCR3_PATHWAY	28	0.225066	0.779715	0.828402	0.965306	1	236
1803	SWITCHING OF ORIGINS TO A POST-REPLICATIVE STATE%REACTOME DATABASE ID RELEASE 75%69052	70	0.180598	0.779461	0.887967	0.965143	1	2525
1804	PROTEIN REFOLDING%GOBP%GO:0042026	15	0.268997	0.778059	0.781333	0.966626	1	1791
1805	NEGATIVE REGULATION OF TRANSPORTER ACTIVITY%GOBP%GO:0032410	31	0.21843	0.77627	0.860465	0.968704	1	1789
1806	POSITIVE REGULATION OF PROTEIN IMPORT INTO NUCLEUS%GOBP%GO:0042307	18	0.249019	0.775871	0.80109	0.968737	1	96
1807	REGULATION OF EXTRINSIC APOPTOTIC SIGNALING PATHWAY VIA DEATH DOMAIN RECEPTORS%GOBP%GO:1902041	27	0.217389	0.775225	0.846626	0.969181	1	1291
1808	BIOCARTA_EIF_PATHWAY%MSIGDB_C2%BIOCARTA_EIF_PATHWAY	15	0.266048	0.775061	0.806818	0.96887	1	2849
1809	BIOCARTA_MTOR_PATHWAY%MSIGDB_C2%BIOCARTA_MTOR_PATHWAY	15	0.27088	0.77481	0.802168	0.968689	1	2437
1810	NANOPARTICLE-MEDIATED ACTIVATION OF RECEPTOR SIGNALING%WIKIPATHWAYS_20210210%WP2643%HOMO SAPIENS	20	0.234992	0.774283	0.842667	0.968944	1	2939
1811	NEGATIVE REGULATION OF ION TRANSMEMBRANE TRANSPORTER ACTIVITY%GOBP%GO:0032413	26	0.224035	0.774244	0.845921	0.968463	1	1789
1812	VITAMIN TRANSPORT%GOBP%GO:0051180	20	0.242309	0.773721	0.831858	0.968709	1	1350
1813	OXIDATIVE DAMAGE%WIKIPATHWAYS_20210210%WP3941%HOMO SAPIENS	18	0.249957	0.772724	0.792839	0.969607	1	2524
1814	BLADDER CANCER%WIKIPATHWAYS_20210210%WP2828%HOMO SAPIENS	24	0.233168	0.771733	0.808451	0.970466	1	591
1815	ESTABLISHMENT OF VESICLE LOCALIZATION%GOBP%GO:0051650	132	0.16265	0.771353	0.988235	0.970448	1	1671
1816	NEGATIVE REGULATION OF APOPTOTIC SIGNALING PATHWAY%GOBP%GO:2001234	81	0.174358	0.769786	0.93578	0.972109	1	1291
1817	TRANSCRIPTION ELONGATION FROM RNA POLYMERASE II PROMOTER%GOBP%GO:0006368	44	0.195806	0.769493	0.884892	0.971981	1	1485
1818	IL12-MEDIATED SIGNALING EVENTS%PATHWAY INTERACTION DATABASE NCI-NATURE CURATED DATA%IL12-MEDIATED SIGNALING EVENTS	20	0.241529	0.769433	0.803922	0.971539	1	2368
1819	POSITIVE REGULATION OF CYSTEINE-TYPE ENDOPEPTIDASE ACTIVITY INVOLVED IN APOPTOTIC PROCESS%GOBP%GO:0043280	57	0.191356	0.769016	0.903226	0.971598	1	1249
1820	SIGNALING BY TYPE 1 INSULIN-LIKE GROWTH FACTOR 1 RECEPTOR (IGF1R)%REACTOME DATABASE ID RELEASE 75%2404192	15	0.261833	0.768965	0.784574	0.971136	1	369
1821	PID_IFNG_PATHWAY%MSIGDB_C2%PID_IFNG_PATHWAY	24	0.227286	0.76858	0.825688	0.97116	1	1034
1822	G ALPHA (Q) SIGNALLING EVENTS%REACTOME%R-HSA-416476.6	51	0.194228	0.768106	0.904762	0.971318	1	1525
1823	REGULATION OF MYOTUBE DIFFERENTIATION%GOBP%GO:0010830	16	0.256188	0.767395	0.809524	0.971815	1	1534
1824	HALLMARK_CHOLESTEROL_HOMEOSTASIS%MSIGDB_C2%HALLMARK_CHOLESTEROL_HOMEOSTASIS	49	0.192247	0.767042	0.875458	0.971796	1	1762
1825	MITOTIC G1 DNA DAMAGE CHECKPOINT%GOBP%GO:0031571	26	0.221832	0.766775	0.838816	0.971614	1	1342
1826	REGULATION OF POTASSIUM ION TRANSMEMBRANE TRANSPORTER ACTIVITY%GOBP%GO:1901016	20	0.240709	0.766086	0.822454	0.972017	1	1668
1827	UBIQUITIN-DEPENDENT DEGRADATION OF CYCLIN D%REACTOME DATABASE ID RELEASE 75%75815	48	0.19473	0.765985	0.897727	0.971607	1	2943
1828	FAS SIGNALING PATHWAY%PANTHER PATHWAY%P00020	19	0.241103	0.764944	0.825858	0.972449	1	1963
1829	PID_LYSOPHOSPHOLIPID_PATHWAY%MSIGDB_C2%PID_LYSOPHOSPHOLIPID_PATHWAY	47	0.193628	0.76216	0.898833	0.975731	1	1361
1830	TOLL LIKE RECEPTOR 10 (TLR10) CASCADE%REACTOME DATABASE ID RELEASE 75%168142	42	0.190652	0.762046	0.881944	0.975347	1	2337
1831	PRE-REPLICATIVE COMPLEX ASSEMBLY%GOBP%GO:0036388	54	0.184624	0.761979	0.89313	0.974894	1	2943
1832	FORMATION OF THE CORNIFIED ENVELOPE%REACTOME%R-HSA-6809371.3	27	0.215032	0.760613	0.849359	0.976236	1	1754
1833	REGULATION OF STRIATED MUSCLE CELL DIFFERENTIATION%GOBP%GO:0051153	25	0.226215	0.760056	0.840336	0.976416	1	1534
1834	GLYCOLYSIS I%HUMANCYC%GLYCOLYSIS	22	0.235726	0.759682	0.82029	0.976382	1	0
1835	MESENCHYMAL CELL DEVELOPMENT%GOBP%GO:0014031	28	0.217656	0.759037	0.859649	0.976736	1	1349
1836	REGULATION OF RESPONSE TO OXIDATIVE STRESS%GOBP%GO:1902882	33	0.208704	0.758522	0.880878	0.9769	1	1173
1837	DNA-TEMPLATED TRANSCRIPTION, ELONGATION%GOBP%GO:0006354	44	0.195806	0.758436	0.870432	0.976498	1	1485
1838	HOST INTERACTIONS OF HIV FACTORS%REACTOME%R-HSA-162909.1	113	0.163294	0.757202	0.989583	0.977583	1	1780
1839	IFN-GAMMA PATHWAY%PATHWAY INTERACTION DATABASE NCI-NATURE CURATED DATA%IFN-GAMMA PATHWAY	24	0.227286	0.756797	0.857143	0.977565	1	1034
1840	FGF SIGNALING PATHWAY%PANTHER PATHWAY%P00021	52	0.183471	0.755426	0.938849	0.978782	1	1034
1841	INSULIN-MEDIATED GLUCOSE TRANSPORT%PATHWAY INTERACTION DATABASE NCI-NATURE CURATED DATA%INSULIN-MEDIATED GLUCOSE TRANSPORT	20	0.234639	0.75542	0.840456	0.978255	1	2965
1842	ACTIVATION OF NMDA RECEPTORS AND POSTSYNAPTIC EVENTS%REACTOME DATABASE ID RELEASE 75%442755	35	0.209309	0.755037	0.863924	0.978223	1	1734
1843	HALLMARK_APOPTOSIS%MSIGDB_C2%HALLMARK_APOPTOSIS	92	0.168656	0.755005	0.951691	0.977731	1	2020
1844	CELL-CELL SIGNALING BY WNT%GOBP%GO:0198738	118	0.163266	0.754956	0.977901	0.977255	1	1779
1845	FC EPSILON RECEPTOR (FCERI) SIGNALING%REACTOME DATABASE ID RELEASE 75%2454202	94	0.164708	0.754779	0.969849	0.976929	1	2567
1846	PID_AP1_PATHWAY%MSIGDB_C2%PID_AP1_PATHWAY	22	0.227994	0.754152	0.825073	0.977181	1	1544
1847	POSITIVE REGULATION OF DNA BINDING%GOBP%GO:0043388	19	0.246073	0.754075	0.819672	0.976762	1	188
1848	REGULATION OF GENE SILENCING BY MIRNA%GOBP%GO:0060964	60	0.17985	0.753748	0.920152	0.976643	1	1334
1849	REGULATION OF INTERFERON-GAMMA PRODUCTION%GOBP%GO:0032649	27	0.215985	0.753664	0.890966	0.976246	1	526
1850	VIF-MEDIATED DEGRADATION OF APOBEC3G%REACTOME DATABASE ID RELEASE 75%180585	50	0.18478	0.753538	0.931559	0.97587	1	2943
1851	TRNA PROCESSING IN THE NUCLEUS%REACTOME DATABASE ID RELEASE 75%6784531	41	0.199366	0.753064	0.905923	0.97594	1	1152
1852	MAPK CASCADE%WIKIPATHWAYS_20210210%WP422%HOMO SAPIENS	20	0.232612	0.752848	0.84573	0.975697	1	2346
1853	SIGNALING BY NTRKS%REACTOME%R-HSA-166520.4	64	0.181976	0.751711	0.918033	0.976653	1	1209
1854	REGULATION OF PURINE NUCLEOTIDE METABOLIC PROCESS%GOBP%GO:1900542	63	0.177782	0.750379	0.927966	0.977767	1	1605
1855	GLYCOGEN METABOLIC PROCESS%GOBP%GO:0005977	15	0.256135	0.750181	0.813333	0.977489	1	1291
1856	CELL SURFACE RECEPTOR SIGNALING PATHWAY INVOLVED IN CELL-CELL SIGNALING%GOBP%GO:1905114	121	0.158482	0.749199	0.981366	0.978201	1	1779
1857	REGULATION OF GENE SILENCING BY RNA%GOBP%GO:0060966	61	0.178853	0.749169	0.925651	0.977708	1	1334
1858	NEGATIVE REGULATION OF PROTEIN LOCALIZATION TO PLASMA MEMBRANE%GOBP%GO:1903077	15	0.259132	0.748898	0.804688	0.977511	1	1202
1859	T-CELL RECEPTOR AND CO-STIMULATORY SIGNALING%WIKIPATHWAYS_20210210%WP2583%HOMO SAPIENS	17	0.245593	0.748854	0.844327	0.977039	1	155
1860	BIOCARTA_EIF4_PATHWAY%MSIGDB_C2%BIOCARTA_EIF4_PATHWAY	18	0.241586	0.747739	0.835135	0.977894	1	2437
1861	INTEGRIN SIGNALING%REACTOME%R-HSA-354192.2	24	0.224675	0.747217	0.866071	0.977986	1	689
1862	REGULATION OF ORNITHINE DECARBOXYLASE (ODC)%REACTOME DATABASE ID RELEASE 75%350562	44	0.188278	0.746809	0.915751	0.977983	1	2943
1863	ACTIVATION OF NF-KAPPAB IN B CELLS%REACTOME%R-HSA-1169091.1	56	0.186592	0.7464	0.94	0.977954	1	2279
1864	RNA DESTABILIZATION%GOBP%GO:0050779	19	0.239084	0.746232	0.843478	0.977611	1	1098
1865	NEGATIVE REGULATION OF INTRINSIC APOPTOTIC SIGNALING PATHWAY%GOBP%GO:2001243	40	0.1922	0.746196	0.907285	0.977139	1	1422
1866	CELL MIGRATION AND INVASION THROUGH P75NTR%WIKIPATHWAYS_20210210%WP4561%HOMO SAPIENS	17	0.242073	0.744731	0.843407	0.978346	1	2495
1867	PROTEIN IMPORT INTO NUCLEUS%GOBP%GO:0006606	46	0.190535	0.744393	0.924658	0.978208	1	1463
1868	TAT-MEDIATED HIV ELONGATION ARREST AND RECOVERY%REACTOME DATABASE ID RELEASE 75%167243	25	0.217062	0.743571	0.846847	0.978636	1	521
1869	FCGR3A-MEDIATED IL10 SYNTHESIS%REACTOME DATABASE ID RELEASE 75%9664323	23	0.221	0.742698	0.875	0.979108	1	1338
1870	PID_WNT_NONCANONICAL_PATHWAY%MSIGDB_C2%PID_WNT_NONCANONICAL_PATHWAY	16	0.251254	0.742589	0.852055	0.97871	1	1240
1871	MITOTIC G1/S TRANSITION CHECKPOINT%GOBP%GO:0044819	26	0.221832	0.742227	0.883234	0.978634	1	1342
1872	CA2+ PATHWAY%REACTOME%R-HSA-4086398.3	29	0.21077	0.742123	0.890173	0.978228	1	1544
1873	EPH-EPHRIN MEDIATED REPULSION OF CELLS%REACTOME DATABASE ID RELEASE 75%3928665	35	0.205051	0.741445	0.878505	0.97852	1	1289
1874	AP-1 TRANSCRIPTION FACTOR NETWORK%PATHWAY INTERACTION DATABASE NCI-NATURE CURATED DATA%AP-1 TRANSCRIPTION FACTOR NETWORK	22	0.227994	0.741378	0.86	0.97808	1	1544
1875	REGULATION OF POSTTRANSCRIPTIONAL GENE SILENCING%GOBP%GO:0060147	61	0.178853	0.740343	0.934109	0.978757	1	1334
1876	WNT SIGNALING PATHWAY%GOBP%GO:0016055	116	0.157282	0.740242	1	0.978356	1	1779
1877	NONCANONICAL WNT SIGNALING PATHWAY%PATHWAY INTERACTION DATABASE NCI-NATURE CURATED DATA%NONCANONICAL WNT SIGNALING PATHWAY	16	0.251254	0.738795	0.815584	0.97953	1	1240
1878	ASSEMBLY OF THE PRE-REPLICATIVE COMPLEX%REACTOME DATABASE ID RELEASE 75%68867	54	0.184624	0.738302	0.929461	0.979595	1	2943
1879	NEGATIVE REGULATION OF EXTRINSIC APOPTOTIC SIGNALING PATHWAY%GOBP%GO:2001237	40	0.193325	0.737942	0.930233	0.979462	1	2187
1880	BIOCARTA_ERK_PATHWAY%MSIGDB_C2%BIOCARTA_ERK_PATHWAY	17	0.242986	0.737464	0.84252	0.97949	1	449
1881	PAUSING AND RECOVERY OF TAT-MEDIATED HIV ELONGATION%REACTOME DATABASE ID RELEASE 75%167238	25	0.217062	0.736861	0.872832	0.979631	1	521
1882	REGULATION OF CARBOHYDRATE BIOSYNTHETIC PROCESS%GOBP%GO:0043255	29	0.211178	0.736833	0.879433	0.979135	1	188
1883	SUMOYLATION OF TRANSCRIPTION COFACTORS%REACTOME DATABASE ID RELEASE 75%3899300	15	0.250482	0.736424	0.849727	0.979084	1	2148
1884	CELLULAR RESPONSE TO TUMOR NECROSIS FACTOR%GOBP%GO:0071356	82	0.169121	0.736308	0.965174	0.978692	1	2187
1885	REGULATION OF LIPID CATABOLIC PROCESS%GOBP%GO:0050994	20	0.235949	0.734915	0.844633	0.979713	1	1376
1886	AUF1 (HNRNP D0) BINDS AND DESTABILIZES MRNA%REACTOME%R-HSA-450408.3	51	0.185143	0.734428	0.929889	0.979718	1	2960
1887	MYD88 CASCADE INITIATED ON PLASMA MEMBRANE%REACTOME DATABASE ID RELEASE 75%975871	42	0.190652	0.733902	0.910653	0.979746	1	2337
1888	PID_INSULIN_GLUCOSE_PATHWAY%MSIGDB_C2%PID_INSULIN_GLUCOSE_PATHWAY	20	0.234639	0.732698	0.878116	0.980482	1	2965
1889	CELLULAR RESPONSE TO INSULIN STIMULUS%GOBP%GO:0032869	72	0.166994	0.731747	0.972973	0.981015	1	1671
1890	TOLL LIKE RECEPTOR 5 (TLR5) CASCADE%REACTOME DATABASE ID RELEASE 75%168176	42	0.190652	0.731159	0.931034	0.981167	1	2337
1891	POSITIVE REGULATION OF TYPE I INTERFERON PRODUCTION%GOBP%GO:0032481	43	0.188736	0.730527	0.944444	0.981278	1	798
1892	REGULATION OF GENERATION OF PRECURSOR METABOLITES AND ENERGY%GOBP%GO:0043467	72	0.174573	0.729996	0.952991	0.981323	1	1605
1893	DISORDERS OF TRANSMEMBRANE TRANSPORTERS%REACTOME DATABASE ID RELEASE 75%5619115	111	0.159036	0.729812	0.969325	0.981009	1	1350
1894	COPI-MEDIATED ANTEROGRADE TRANSPORT%REACTOME%R-HSA-6807878.1	68	0.172868	0.728754	0.970149	0.981598	1	2037
1895	INTEGRIN-MEDIATED CELL ADHESION%WIKIPATHWAYS_20210210%WP185%HOMO SAPIENS	75	0.16707	0.728354	0.970588	0.981507	1	2165
1896	G1/S TRANSITION OF MITOTIC CELL CYCLE%GOBP%GO:0000082	36	0.196062	0.727265	0.941176	0.982155	1	1587
1897	HIV ELONGATION ARREST AND RECOVERY%REACTOME DATABASE ID RELEASE 75%167287	26	0.21126	0.72689	0.883008	0.982008	1	521
1898	DEFECTS IN VITAMIN AND COFACTOR METABOLISM%REACTOME DATABASE ID RELEASE 75%3296482	16	0.240949	0.726483	0.887728	0.98195	1	140
1899	CELL CYCLE G1/S PHASE TRANSITION%GOBP%GO:0044843	36	0.196062	0.725393	0.920415	0.982566	1	1587
1900	RHO GTPASES ACTIVATE NADPH OXIDASES%REACTOME%R-HSA-5668599.6	18	0.232484	0.725382	0.87766	0.982062	1	1512
1901	POSITIVE REGULATION OF POTASSIUM ION TRANSMEMBRANE TRANSPORT%GOBP%GO:1901381	15	0.242918	0.724452	0.880597	0.982461	1	1668
1902	APOPTOTIC SIGNALING PATHWAY%GOBP%GO:0097190	98	0.15599	0.722581	0.994975	0.983841	1	1291
1903	MITOTIC G1 PHASE AND G1 S TRANSITION%REACTOME%R-HSA-453279.4	87	0.162586	0.722398	0.990431	0.98351	1	2460
1904	NEGATIVE REGULATION OF CELLULAR AMIDE METABOLIC PROCESS%GOBP%GO:0034249	81	0.165069	0.722138	0.956522	0.983259	1	2080
1905	THE ROLE OF NEF IN HIV-1 REPLICATION AND DISEASE PATHOGENESIS%REACTOME DATABASE ID RELEASE 75%164952	23	0.220849	0.722045	0.88102	0.982811	1	377
1906	STRIATED MUSCLE CELL DIFFERENTIATION%GOBP%GO:0051146	40	0.187321	0.721626	0.91875	0.982701	1	1556
1907	CALCIUM ION REGULATED EXOCYTOSIS%GOBP%GO:0017156	30	0.203473	0.721033	0.927492	0.982754	1	2213
1908	COPI-DEPENDENT GOLGI-TO-ER RETROGRADE TRAFFIC%REACTOME%R-HSA-6811434.1	53	0.178601	0.720942	0.958175	0.982329	1	580
1909	PID_ECADHERIN_NASCENT_AJ_PATHWAY%MSIGDB_C2%PID_ECADHERIN_NASCENT_AJ_PATHWAY	35	0.196103	0.720869	0.894198	0.981883	1	2522
1910	PAUSING AND RECOVERY OF HIV ELONGATION%REACTOME%R-HSA-167290.2	26	0.21126	0.719764	0.917721	0.982445	1	521
1911	POSITIVE REGULATION OF MITOTIC CELL CYCLE%GOBP%GO:0045931	60	0.173571	0.719095	0.962963	0.982559	1	1835
1912	PID_PRL_SIGNALING_EVENTS_PATHWAY%MSIGDB_C2%PID_PRL_SIGNALING_EVENTS_PATHWAY	17	0.231817	0.717122	0.890449	0.983924	1	959
1913	NUCLEOTIDE-SUGAR BIOSYNTHETIC PROCESS%GOBP%GO:0009226	20	0.219569	0.71634	0.866485	0.984136	1	5052
1914	SYNTHESIS OF ACTIVE UBIQUITIN: ROLES OF E1 AND E2 ENZYMES%REACTOME DATABASE ID RELEASE 75%8866652	21	0.220341	0.715604	0.887283	0.984322	1	1170
1915	PID_FRA_PATHWAY%MSIGDB_C2%PID_FRA_PATHWAY	17	0.233664	0.715451	0.871134	0.983937	1	591
1916	RIBOSOMAL LARGE SUBUNIT ASSEMBLY%GOBP%GO:0000027	19	0.230253	0.715072	0.90085	0.983793	1	1573
1917	REGULATION OF TRANSLATIONAL INITIATION%GOBP%GO:0006446	47	0.182111	0.713755	0.95946	0.984539	1	1538
1918	BIOCARTA_HIVNEF_PATHWAY%MSIGDB_C2%BIOCARTA_HIVNEF_PATHWAY	28	0.201055	0.712517	0.925466	0.985088	1	2313
1919	DECTIN-1 MEDIATED NONCANONICAL NF-KB SIGNALING%REACTOME%R-HSA-5607761.1	53	0.171205	0.711465	0.972125	0.985531	1	2279
1920	POSITIVE REGULATION OF PHAGOCYTOSIS%GOBP%GO:0050766	25	0.210237	0.711094	0.872727	0.985334	1	929
1921	G1 DNA DAMAGE CHECKPOINT%GOBP%GO:0044783	27	0.202688	0.711046	0.895899	0.984868	1	1342
1922	REGULATION OF NEUROTRANSMITTER SECRETION%GOBP%GO:0046928	19	0.22946	0.708028	0.88	0.986973	1	2091
1923	CORTICOTROPIN-RELEASING HORMONE SIGNALING PATHWAY%WIKIPATHWAYS_20210210%WP2355%HOMO SAPIENS	49	0.175404	0.706696	0.955172	0.987544	1	1544
1924	CHOLESTEROL EFFLUX%GOBP%GO:0033344	15	0.244676	0.706625	0.850667	0.987092	1	1311
1925	FBXL7 DOWN-REGULATES AURKA DURING MITOTIC ENTRY AND IN EARLY MITOSIS%REACTOME%R-HSA-8854050.2	49	0.176784	0.703649	0.960145	0.989104	1	2943
1926	ANTIGEN PROCESSING AND PRESENTATION OF EXOGENOUS PEPTIDE ANTIGEN VIA MHC CLASS I, TAP-DEPENDENT%GOBP%GO:0002479	68	0.164007	0.70259	0.987288	0.989487	1	2160
1927	BETA5 BETA6 BETA7 AND BETA8 INTEGRIN CELL SURFACE INTERACTIONS%PATHWAY INTERACTION DATABASE NCI-NATURE CURATED DATA%BETA5 BETA6 BETA7 AND BETA8 INTEGRIN CELL SURFACE INTERACTIONS	15	0.23759	0.701569	0.88601	0.989867	1	2497
1928	POSITIVE REGULATION OF INTERFERON-GAMMA PRODUCTION%GOBP%GO:0032729	16	0.22976	0.701166	0.884021	0.989718	1	526
1929	G1 S TRANSITION%REACTOME DATABASE ID RELEASE 75%69206	82	0.160438	0.700958	0.98419	0.989365	1	2503
1930	RESPONSE TO INTERLEUKIN-1%GOBP%GO:0070555	90	0.154681	0.69762	0.990385	0.991537	1	2187
1931	SIGNALING EVENTS MEDIATED BY PRL%PATHWAY INTERACTION DATABASE NCI-NATURE CURATED DATA%SIGNALING EVENTS MEDIATED BY PRL	17	0.231817	0.69708	0.907821	0.991453	1	959
1932	NEGATIVE REGULATION OF RECEPTOR-MEDIATED ENDOCYTOSIS%GOBP%GO:0048261	19	0.21456	0.695822	0.897361	0.991987	1	340
1933	COSTIMULATION BY THE CD28 FAMILY%REACTOME%R-HSA-388841.3	37	0.187564	0.693592	0.953901	0.99326	1	96
1934	CELL MATURATION%GOBP%GO:0048469	28	0.201956	0.693511	0.935811	0.992811	1	1098
1935	LYSOSOME VESICLE BIOGENESIS%REACTOME DATABASE ID RELEASE 75%432720	27	0.20391	0.69282	0.932203	0.992826	1	1571
1936	PYRIMIDINE NUCLEOSIDE METABOLIC PROCESS%GOBP%GO:0006213	19	0.221976	0.692453	0.900285	0.99262	1	761
1937	REGULATION OF MUSCLE ADAPTATION%GOBP%GO:0043502	20	0.220604	0.692282	0.899743	0.992234	1	1764
1938	HALLMARK_ANDROGEN_RESPONSE%MSIGDB_C2%HALLMARK_ANDROGEN_RESPONSE	66	0.163826	0.690716	0.974359	0.992919	1	2337
1939	B CELL ACTIVATION%PANTHER PATHWAY%P00010	30	0.19625	0.690564	0.942857	0.992504	1	1034
1940	VALIDATED TRANSCRIPTIONAL TARGETS OF AP1 FAMILY MEMBERS FRA1 AND FRA2%PATHWAY INTERACTION DATABASE NCI-NATURE CURATED DATA%VALIDATED TRANSCRIPTIONAL TARGETS OF AP1 FAMILY MEMBERS FRA1 AND FRA2	17	0.233664	0.690004	0.900277	0.99242	1	591
1941	PROTEIN LOCALIZATION TO NUCLEUS%GOBP%GO:0034504	73	0.159844	0.687338	0.988	0.993884	1	1568
1942	PID_INTEGRIN5_PATHWAY%MSIGDB_C2%PID_INTEGRIN5_PATHWAY	15	0.23759	0.687257	0.889764	0.993428	1	2497
1943	DRUG TRANSMEMBRANE TRANSPORT%GOBP%GO:0006855	34	0.189089	0.685605	0.94863	0.994144	1	1212
1944	RESPONSE TO HYDROGEN PEROXIDE%GOBP%GO:0042542	30	0.196243	0.683431	0.932515	0.995189	1	1173
1945	E-CADHERIN SIGNALING IN THE NASCENT ADHERENS JUNCTION%PATHWAY INTERACTION DATABASE NCI-NATURE CURATED DATA%E-CADHERIN SIGNALING IN THE NASCENT ADHERENS JUNCTION	32	0.190003	0.680542	0.953271	0.996619	1	2522
1946	NEGATIVE REGULATION OF WNT SIGNALING PATHWAY%GOBP%GO:0030178	95	0.14812	0.680122	0.995392	0.996414	1	1800
1947	RESPONSE TO INSULIN%GOBP%GO:0032868	77	0.157299	0.680036	0.987013	0.995954	1	1671
1948	NUCLEOSIDE BIOSYNTHETIC PROCESS%GOBP%GO:0009163	18	0.222186	0.679907	0.906077	0.995522	1	237
1949	POSITIVE REGULATION OF MITOTIC CELL CYCLE PHASE TRANSITION%GOBP%GO:1901992	30	0.191449	0.679879	0.958457	0.995034	1	1817
1950	CELLULAR DETOXIFICATION%GOBP%GO:1990748	19	0.216631	0.678813	0.916667	0.995285	1	1311
1951	SIGNALING BY NOTCH4%REACTOME%R-HSA-9013694.2	62	0.158355	0.677977	0.995951	0.995326	1	2062
1952	DE NOVO PURINE BIOSYNTHESIS%PANTHER PATHWAY%P02738	17	0.221299	0.676529	0.913514	0.995789	1	259
1953	POST-TRANSLATIONAL PROTEIN MODIFICATION%GOBP%GO:0043687	204	0.135562	0.675194	1	0.996079	1	2104
1954	NUCLEOBASE-CONTAINING COMPOUND CATABOLIC PROCESS%GOBP%GO:0034655	257	0.127191	0.668737	1	0.999631	1	2408
1955	POSITIVE REGULATION OF INTRINSIC APOPTOTIC SIGNALING PATHWAY%GOBP%GO:2001244	22	0.204149	0.666091	0.94375	1	1	1577
1956	CELLULAR RESPONSE TO PEPTIDE HORMONE STIMULUS%GOBP%GO:0071375	101	0.147714	0.664992	1	1	1	1738
1957	REGULATION OF ANIMAL ORGAN MORPHOGENESIS%GOBP%GO:2000027	92	0.146797	0.664744	1	1	1	1778
1958	DRUG TRANSPORT%GOBP%GO:0015893	65	0.156851	0.663757	0.987179	1	1	1212
1959	ER TO GOLGI VESICLE-MEDIATED TRANSPORT%GOBP%GO:0006888	136	0.133916	0.661486	1	1	1	1736
1960	NIK-->NONCANONICAL NF-KB SIGNALING%REACTOME%R-HSA-5676590.1	52	0.163316	0.660924	0.98524	1	1	2160
1961	COFACTOR CATABOLIC PROCESS%GOBP%GO:0051187	41	0.171497	0.659572	0.971119	1	1	2168
1962	VEGF SIGNALING PATHWAY%PANTHER PATHWAY%P00056	39	0.176551	0.656868	0.969072	1	1	1190
1963	NEGATIVE REGULATION OF PROTEIN COMPLEX DISASSEMBLY%GOBP%GO:0043242	34	0.179279	0.65543	0.962585	1	1	1224
1964	VPU MEDIATED DEGRADATION OF CD4%REACTOME DATABASE ID RELEASE 75%180534	47	0.165358	0.654576	0.98913	1	1	2943
1965	SCF-BETA-TRCP MEDIATED DEGRADATION OF EMI1%REACTOME%R-HSA-174113.3	48	0.16302	0.654053	0.978571	1	1	2943
1966	CTLA4 INHIBITORY SIGNALING%REACTOME DATABASE ID RELEASE 75%389513	16	0.218246	0.653702	0.922078	1	1	2089
1967	REGULATION OF CELL AGING%GOBP%GO:0090342	15	0.221773	0.652415	0.901763	1	1	1828
1968	TRANSFERRIN TRANSPORT%GOBP%GO:0033572	26	0.185882	0.651107	0.964286	1	1	755
1969	MYD88:MAL(TIRAP) CASCADE INITIATED ON PLASMA MEMBRANE%REACTOME DATABASE ID RELEASE 75%166058	46	0.164019	0.650761	0.990132	1	1	1804
1970	INSULIN IGF PATHWAY-MITOGEN ACTIVATED PROTEIN KINASE KINASE MAP KINASE CASCADE%PANTHER PATHWAY%P00032	15	0.21692	0.649231	0.952507	1	1	5068
1971	DAG AND IP3 SIGNALING%REACTOME%R-HSA-1489509.2	25	0.192601	0.648107	0.957831	1	1	1031
1972	TOLL LIKE RECEPTOR 2 (TLR2) CASCADE%REACTOME%R-HSA-181438.1	46	0.164019	0.647645	0.985816	1	1	1804
1973	REGULATION OF CELLULAR AMINO ACID METABOLIC PROCESS%GOBP%GO:0006521	49	0.163921	0.646606	0.981752	1	1	2160
1974	TOLL LIKE RECEPTOR TLR1:TLR2 CASCADE%REACTOME DATABASE ID RELEASE 75%168179	46	0.164019	0.645106	0.978495	1	1	1804
1975	TOLL LIKE RECEPTOR TLR6:TLR2 CASCADE%REACTOME%R-HSA-168188.1	46	0.164019	0.641921	0.982014	1	1	1804
1976	BIOCARTA_COMP_PATHWAY%MSIGDB_C2%BIOCARTA_COMP_PATHWAY	19	0.206512	0.641796	0.934726	1	1	2441
1977	BETA-CATENIN INDEPENDENT WNT SIGNALING%REACTOME%R-HSA-3858494.3	93	0.14415	0.641262	0.994681	1	1	1778
1978	SIGNALING BY RAF1 MUTANTS%REACTOME%R-HSA-9656223.1	28	0.183839	0.641261	0.957704	1	1	2237
1979	THROMBIN SIGNALLING THROUGH PROTEINASE ACTIVATED RECEPTORS (PARS)%REACTOME%R-HSA-456926.1	19	0.206924	0.638547	0.930481	1	1	2374
1980	DNA DAMAGE RECOGNITION IN GG-NER%REACTOME DATABASE ID RELEASE 75%5696394	25	0.190478	0.636368	0.968116	1	1	2409
1981	NEDDYLATION%REACTOME%R-HSA-8951664.2	109	0.136487	0.632712	1	1	1	2095
1982	'DE NOVO' PROTEIN FOLDING%GOBP%GO:0006458	27	0.181247	0.629018	0.971154	1	1	1536
1983	PHAGOSOME MATURATION%GOBP%GO:0090382	30	0.176142	0.627214	0.974763	1	1	2440
1984	TRIVALENT INORGANIC CATION TRANSPORT%GOBP%GO:0072512	26	0.185882	0.627205	0.965517	1	1	755
1985	FERRIC IRON TRANSPORT%GOBP%GO:0015682	26	0.185882	0.625731	0.973988	1	1	755
1986	FCERI MEDIATED CA+2 MOBILIZATION%REACTOME%R-HSA-2871809.1	17	0.208776	0.622346	0.943548	1	1	991
1987	ENERGY RESERVE METABOLIC PROCESS%GOBP%GO:0006112	17	0.211039	0.620309	0.950685	1	1	1291
1988	CLASS I PI3K SIGNALING EVENTS MEDIATED BY AKT%PATHWAY INTERACTION DATABASE NCI-NATURE CURATED DATA%CLASS I PI3K SIGNALING EVENTS MEDIATED BY AKT	21	0.189274	0.618734	0.96034	1	1	441
1989	PID_PI3KCI_AKT_PATHWAY%MSIGDB_C2%PID_PI3KCI_AKT_PATHWAY	21	0.189274	0.610749	0.970502	1	1	441
1990	REGULATION OF ACTIVATED PAK-2P34 BY PROTEASOME MEDIATED DEGRADATION%REACTOME%R-HSA-211733.1	47	0.154968	0.610282	0.996711	1	1	2943
1991	REGULATION OF RUNX3 EXPRESSION AND ACTIVITY%REACTOME%R-HSA-8941858.1	48	0.153351	0.60597	0.99639	1	1	2943
1992	PROTEIN DEPOLYMERIZATION%GOBP%GO:0051261	20	0.18702	0.604951	0.983379	1	1	1831
1993	MYELOID LEUKOCYTE DIFFERENTIATION%GOBP%GO:0002573	31	0.167878	0.603678	0.984568	1	1	579
1994	REGULATION OF SYNAPTIC VESICLE EXOCYTOSIS%GOBP%GO:2000300	15	0.208714	0.60187	0.961853	1	1	2091
1995	BIOCARTA_MCALPAIN_PATHWAY%MSIGDB_C2%BIOCARTA_MCALPAIN_PATHWAY	15	0.204969	0.601836	0.949239	1	1	2183
1996	REGULATION OF PROTEIN EXPORT FROM NUCLEUS%GOBP%GO:0046825	19	0.190364	0.600968	0.955621	1	1	1395
1997	DEGRADATION OF DVL%REACTOME%R-HSA-4641258.2	48	0.148748	0.600949	1	1	1	2943
1998	STRIATED MUSCLE CELL DEVELOPMENT%GOBP%GO:0055002	30	0.168688	0.599399	0.979885	1	1	200
[truncated: 50 more rows]

## Sheet: SupTable4B
Supplementary Table 4B. List of functional annotations enriched in proteins more frequently identified in lEV datasets. ES, enrichment score; NES, normalized enrichment score; NOM, nominal; FDR, false discovery rate; FWER, family-wise error rate.
Index	Functional term	Size	ES	NES	NOM p-val	FDR q-val	FWER p-val	RANK AT MAX
1	THE CITRIC ACID (TCA) CYCLE AND RESPIRATORY ELECTRON TRANSPORT%REACTOME DATABASE ID RELEASE 75%1428517	102	-0.714672	-2.38849	0	0	0	1841
2	HALLMARK_OXIDATIVE_PHOSPHORYLATION%MSIGDB_C2%HALLMARK_OXIDATIVE_PHOSPHORYLATION	154	-0.762425	-2.2307	0	0.000373637	0.001	1915
3	OXIDATION-REDUCTION PROCESS%GOBP%GO:0055114	190	-0.743314	-2.22849	0	0.000249091	0.001	1850
4	RESPIRATORY ELECTRON TRANSPORT, ATP SYNTHESIS BY CHEMIOSMOTIC COUPLING, AND HEAT PRODUCTION BY UNCOUPLING PROTEINS.%REACTOME%R-HSA-163200.1	67	-0.771742	-2.22045	0	0.000186818	0.001	1814
5	CELLULAR RESPIRATION%GOBP%GO:0045333	73	-0.77075	-2.18521	0	0.000298491	0.002	1915
6	FATTY ACID CATABOLIC PROCESS%GOBP%GO:0009062	49	-0.71748	-2.18367	0	0.000248743	0.002	1897
7	GENERATION OF PRECURSOR METABOLITES AND ENERGY%GOBP%GO:0006091	158	-0.710955	-2.17144	0	0.000427916	0.004	1850
8	PYRUVATE METABOLISM AND CITRIC ACID (TCA) CYCLE%REACTOME DATABASE ID RELEASE 75%71406	37	-0.7271	-2.15302	0	0.000468245	0.005	1028
9	OXIDATIVE PHOSPHORYLATION%GOBP%GO:0006119	54	-0.733648	-2.149	0	0.000500857	0.006	1814
10	LIPID OXIDATION%GOBP%GO:0034440	45	-0.72142	-2.12196	0	0.00112709	0.015	1837
11	FATTY ACID OXIDATION%GOBP%GO:0019395	42	-0.774344	-2.11364	0	0.00129958	0.019	1837
12	ELECTRON TRANSPORT CHAIN (OXPHOS SYSTEM IN MITOCHONDRIA)%WIKIPATHWAYS_20210210%WP111%HOMO SAPIENS	55	-0.873041	-2.0957	0	0.00162987	0.026	1814
13	RESPIRATORY ELECTRON TRANSPORT CHAIN%GOBP%GO:0022904	50	-0.721426	-2.08888	0	0.00173658	0.03	1915
14	FATTY ACID BETA-OXIDATION%GOBP%GO:0006635	35	-0.72971	-2.07962	0	0.00204205	0.037	1837
15	ELECTRON TRANSPORT CHAIN%GOBP%GO:0022900	54	-0.703122	-2.07892	0	0.0020053	0.039	1915
16	RESPIRATORY ELECTRON TRANSPORT%REACTOME%R-HSA-611105.3	55	-0.846432	-2.07824	0	0.00187996	0.039	1766
17	MONOCARBOXYLIC ACID CATABOLIC PROCESS%GOBP%GO:0072329	59	-0.721568	-2.07785	0	0.00176938	0.039	1897
18	ENERGY DERIVATION BY OXIDATION OF ORGANIC COMPOUNDS%GOBP%GO:0015980	91	-0.742079	-2.04908	0	0.0028786	0.068	1915
19	AEROBIC RESPIRATION%GOBP%GO:0009060	38	-0.726251	-2.04269	0	0.00300403	0.074	1906
20	CELLULAR HORMONE METABOLIC PROCESS%GOBP%GO:0034754	32	-0.89201	-2.036	0	0.00322827	0.08	1562
21	MONOCARBOXYLIC ACID METABOLIC PROCESS%GOBP%GO:0032787	228	-0.736646	-2.02819	0	0.00350313	0.09	1711
22	LIPID CATABOLIC PROCESS%GOBP%GO:0016042	105	-0.678489	-2.01604	0	0.00436943	0.118	1548
23	ATP METABOLIC PROCESS%GOBP%GO:0046034	104	-0.726189	-2.00521	0	0.00503024	0.141	1850
24	FATTY ACID METABOLIC PROCESS%GOBP%GO:0006631	125	-0.636682	-1.99921	0	0.00535273	0.155	1696
25	PYRUVATE METABOLISM%REACTOME DATABASE ID RELEASE 75%70268	19	-0.610197	-1.99661	0	0.00540941	0.16	1021
26	ATP SYNTHESIS COUPLED ELECTRON TRANSPORT%GOBP%GO:0042773	42	-0.714214	-1.97719	0	0.00725619	0.217	1766
27	PHASE I - FUNCTIONALIZATION OF COMPOUNDS%REACTOME%R-HSA-211945.5	38	-0.900675	-1.97624	0	0.0070439	0.219	1682
28	MITOCHONDRIAL ATP SYNTHESIS COUPLED ELECTRON TRANSPORT%GOBP%GO:0042775	42	-0.593399	-1.95429	0	0.0101193	0.314	1766
29	MITOCHONDRIAL TRANSMEMBRANE TRANSPORT%GOBP%GO:1990542	45	-0.733886	-1.94369	0	0.0120502	0.379	1904
30	CRISTAE FORMATION%GOBP%GO:0042407	17	-0.886537	-1.94157	0	0.0119242	0.386	1814
31	PURINE NUCLEOSIDE MONOPHOSPHATE METABOLIC PROCESS%GOBP%GO:0009126	127	-0.738144	-1.94103	0	0.0115882	0.386	1915
32	PURINE RIBONUCLEOSIDE MONOPHOSPHATE METABOLIC PROCESS%GOBP%GO:0009167	127	-0.84261	-1.93917	0	0.0115304	0.393	1915
33	CRISTAE FORMATION%REACTOME%R-HSA-8949613.2	19	-0.674395	-1.93621	0	0.0121365	0.414	1814
34	CELLULAR LIPID CATABOLIC PROCESS%GOBP%GO:0044242	93	-0.754661	-1.93231	0	0.0124637	0.43	1919
35	ANTIBIOTIC METABOLIC PROCESS%GOBP%GO:0016999	80	-0.812961	-1.92957	0	0.012772	0.448	1675
36	MITOCHONDRIAL RESPIRATORY CHAIN COMPLEX ASSEMBLY%GOBP%GO:0033108	40	-0.593009	-1.92439	0	0.013355	0.475	1552
37	CARBOXYLIC ACID CATABOLIC PROCESS%GOBP%GO:0046395	138	-0.708237	-1.9235	0	0.0131771	0.479	1917
38	RIBONUCLEOSIDE MONOPHOSPHATE METABOLIC PROCESS%GOBP%GO:0009161	129	-0.882109	-1.91131	0	0.0154182	0.541	1915
39	PURINE RIBONUCLEOSIDE TRIPHOSPHATE METABOLIC PROCESS%GOBP%GO:0009205	118	-0.777301	-1.90953	0	0.0154849	0.553	1814
40	MITOCHONDRIAL PROTEIN IMPORT%REACTOME DATABASE ID RELEASE 75%1268020	35	-0.678146	-1.9074	0	0.0155669	0.565	1904
41	REGULATION OF SPROUTING ANGIOGENESIS%GOBP%GO:1903670	32	-0.685476	-1.9073	0	0.0152244	0.566	775
42	ORGANIC ACID CATABOLIC PROCESS%GOBP%GO:0016054	138	-0.571845	-1.89444	0	0.0182562	0.64	1917
43	PURINE NUCLEOSIDE TRIPHOSPHATE METABOLIC PROCESS%GOBP%GO:0009144	120	-0.771391	-1.89354	0	0.0180423	0.646	1814
44	FATTY ACID BETA OXIDATION%WIKIPATHWAYS_20210210%WP143%HOMO SAPIENS	27	-0.88631	-1.88936	0	0.0187763	0.67	1676
45	GLYCOPROTEIN BIOSYNTHETIC PROCESS%GOBP%GO:0009101	112	-0.882109	-1.88607	0	0.0191253	0.685	1499
46	NUCLEOSIDE MONOPHOSPHATE METABOLIC PROCESS%GOBP%GO:0009123	133	-0.769773	-1.88318	0	0.0195904	0.703	1915
47	CITRIC ACID CYCLE (TCA CYCLE)%REACTOME DATABASE ID RELEASE 75%71403	19	-0.803869	-1.88071	0.00312989	0.020005	0.715	1841
48	MITOCHONDRIAL BIOGENESIS%REACTOME%R-HSA-1592230.2	41	-0.731371	-1.87205	0	0.0222939	0.757	1832
49	INNER MITOCHONDRIAL MEMBRANE ORGANIZATION%GOBP%GO:0007007	29	-0.678146	-1.86999	0	0.0226204	0.772	1853
50	GLYCOSYLATION%GOBP%GO:0070085	88	-0.592843	-1.86767	0	0.0227702	0.782	1783
51	PROTEIN LOCALIZATION%REACTOME%R-HSA-9609507.2	85	-0.585621	-1.86362	0	0.023649	0.796	1904
52	OXIDATIVE PHOSPHORYLATION%WIKIPATHWAYS_20210210%WP623%HOMO SAPIENS	38	-0.543384	-1.86287	0	0.023483	0.801	1814
53	RIBONUCLEOSIDE TRIPHOSPHATE METABOLIC PROCESS%GOBP%GO:0009199	121	-0.747001	-1.85831	0	0.0244289	0.821	1814
54	PROTEIN GLYCOSYLATION%GOBP%GO:0006486	80	-0.553195	-1.85455	0	0.0254518	0.835	1783
55	MACROMOLECULE GLYCOSYLATION%GOBP%GO:0043413	80	-0.529237	-1.85243	0	0.0256708	0.845	1783
56	NADH DEHYDROGENASE COMPLEX ASSEMBLY%GOBP%GO:0010257	33	-0.733342	-1.85237	0	0.0252527	0.846	1552
57	STEROID BIOSYNTHETIC PROCESS%GOBP%GO:0006694	46	-0.843026	-1.85237	0	0.0248097	0.846	1848
58	PURINE RIBONUCLEOTIDE METABOLIC PROCESS%GOBP%GO:0009150	209	-0.544146	-1.85076	0	0.0248986	0.855	1828
59	GLYCOPROTEIN METABOLIC PROCESS%GOBP%GO:0009100	146	-0.618729	-1.84839	0	0.0250752	0.862	1499
60	DRUG METABOLIC PROCESS%GOBP%GO:0017144	343	-0.801375	-1.84723	0	0.0251207	0.867	1814
61	HALLMARK_FATTY_ACID_METABOLISM%MSIGDB_C2%HALLMARK_FATTY_ACID_METABOLISM	114	-0.52688	-1.84548	0	0.0253382	0.873	1875
62	PPARA ACTIVATES GENE EXPRESSION%REACTOME DATABASE ID RELEASE 75%1989781	33	-0.748161	-1.83845	0.00144509	0.0274373	0.892	1676
63	CELLULAR AMINO ACID CATABOLIC PROCESS%GOBP%GO:0009063	63	-0.805063	-1.83774	0	0.0272286	0.894	1862
64	OXOACID METABOLIC PROCESS%GOBP%GO:0043436	480	-0.544746	-1.83594	0	0.0274729	0.899	1862
65	METAPATHWAY BIOTRANSFORMATION PHASE I AND II%WIKIPATHWAYS_20210210%WP702%HOMO SAPIENS	62	-0.531023	-1.83462	0	0.0274879	0.902	1674
66	SMALL MOLECULE CATABOLIC PROCESS%GOBP%GO:0044282	213	-0.628403	-1.83322	0	0.0276394	0.909	1920
67	STEROID METABOLIC PROCESS%GOBP%GO:0008202	79	-0.52365	-1.83194	0	0.0277533	0.915	1769
68	MITOCHONDRIAL RESPIRATORY CHAIN COMPLEX I ASSEMBLY%GOBP%GO:0032981	33	-0.533201	-1.83159	0	0.0275107	0.915	1552
69	BRANCHED-CHAIN AMINO ACID METABOLIC PROCESS%GOBP%GO:0009081	18	-0.732463	-1.82608	0.00315457	0.0295629	0.933	1837
70	PRIMARY ALCOHOL METABOLIC PROCESS%GOBP%GO:0034308	30	-0.544767	-1.81773	0	0.0323917	0.951	1562
71	ORGANIC ACID METABOLIC PROCESS%GOBP%GO:0006082	489	-0.774628	-1.81749	0	0.0319781	0.951	1862
72	REGULATION OF MACROPHAGE ACTIVATION%GOBP%GO:0043030	17	-0.687635	-1.81735	0.00314465	0.0315549	0.951	1016
73	RIBONUCLEOTIDE METABOLIC PROCESS%GOBP%GO:0009259	214	-0.734715	-1.81598	0	0.0317395	0.952	1828
74	VIRAL PROTEIN PROCESSING%GOBP%GO:0019082	29	-0.770966	-1.815	0	0.0317871	0.955	1783
75	TRANSLATION OF STRUCTURAL PROTEINS%REACTOME DATABASE ID RELEASE 75%9683701	18	-0.786267	-1.80809	0.00151515	0.0344365	0.966	320
76	MITOCHONDRIAL ELECTRON TRANSPORT, NADH TO UBIQUINONE%GOBP%GO:0006120	28	-0.532545	-1.80716	0.00148588	0.0343388	0.967	1552
77	ALPHA-AMINO ACID CATABOLIC PROCESS%GOBP%GO:1901606	53	-0.797582	-1.8022	0.00142653	0.0362124	0.977	1862
78	TCA CYCLE (AKA KREBS OR CITRIC ACID CYCLE)%WIKIPATHWAYS_20210210%WP78%HOMO SAPIENS	16	-0.653655	-1.80144	0.00322061	0.0361154	0.977	1584
79	CARBOXYLIC ACID METABOLIC PROCESS%GOBP%GO:0019752	434	-0.640751	-1.80083	0	0.0358583	0.977	1862
80	CITRATE METABOLIC PROCESS%GOBP%GO:0006101	23	-0.522559	-1.79944	0	0.0360574	0.979	1841
81	NUCLEOSIDE TRIPHOSPHATE METABOLIC PROCESS%GOBP%GO:0009141	129	-0.556382	-1.79383	0	0.038078	0.985	1814
82	HORMONE METABOLIC PROCESS%GOBP%GO:0042445	58	-0.721686	-1.79288	0	0.0380887	0.986	1562
83	TRICARBOXYLIC ACID CYCLE%GOBP%GO:0006099	22	-0.625957	-1.78805	0.00160772	0.0401748	0.988	1841
84	RIBOSE PHOSPHATE METABOLIC PROCESS%GOBP%GO:0019693	230	-0.612901	-1.78146	0	0.0428407	0.992	1828
85	16P11.2 PROXIMAL DELETION SYNDROME%WIKIPATHWAYS_20210210%WP4949%HOMO SAPIENS	45	-0.787272	-1.77858	0.00139665	0.0438312	0.992	558
86	COMPLEX I BIOGENESIS%REACTOME%R-HSA-6799198.1	32	-0.659953	-1.77642	0	0.0445699	0.993	1552
87	PURINE NUCLEOTIDE METABOLIC PROCESS%GOBP%GO:0006163	226	-0.659948	-1.77507	0	0.0448	0.994	1828
88	TRICARBOXYLIC ACID METABOLIC PROCESS%GOBP%GO:0072350	26	-0.648054	-1.76934	0.00152439	0.047483	0.995	1841
89	MITOCHONDRIAL FATTY ACID BETA-OXIDATION%REACTOME DATABASE ID RELEASE 75%77289	23	-0.683992	-1.76582	0.0014771	0.0490088	0.997	1818
90	REGULATION OF LIPID METABOLISM BY PPARALPHA%REACTOME DATABASE ID RELEASE 75%400206	34	-0.630945	-1.76523	0.00139082	0.0487982	0.997	1676
91	PROTEIN N-LINKED GLYCOSYLATION%GOBP%GO:0006487	35	-0.748135	-1.7641	0.00140845	0.0488398	0.997	1783
92	REGULATION OF LIPASE ACTIVITY%GOBP%GO:0060191	44	-0.70449	-1.76017	0.0013624	0.0508466	0.997	989
93	MATURATION OF SPIKE PROTEIN%REACTOME%R-HSA-9694548.1	21	-0.614681	-1.75933	0.00438597	0.0507842	0.997	1783
94	LIPOSACCHARIDE METABOLIC PROCESS%GOBP%GO:1903509	40	-0.575638	-1.75391	0.00280112	0.0532371	0.997	1575
95	MITOCHONDRION ORGANIZATION%GOBP%GO:0007005	188	-0.773547	-1.75312	0	0.0532217	0.998	1853
96	BRANCHED-CHAIN AMINO ACID CATABOLIC PROCESS%GOBP%GO:0009083	16	-0.612208	-1.74659	0.00314465	0.0569228	0.998	1515
97	GLYCOLIPID BIOSYNTHETIC PROCESS%GOBP%GO:0009247	15	-0.506932	-1.74208	0.00161031	0.059525	0.999	1334
98	ONE-CARBON METABOLIC PROCESS%GOBP%GO:0006730	18	-0.491118	-1.74048	0.00471698	0.0601364	0.999	1513
99	GLYCOLIPID METABOLIC PROCESS%GOBP%GO:0006664	40	-0.682885	-1.73672	0.0042796	0.062184	0.999	1575
100	METABOLIC REPROGRAMMING IN COLON CANCER%WIKIPATHWAYS_20210210%WP4290%HOMO SAPIENS	42	-0.491432	-1.73169	0	0.0650592	0.999	1864
101	LIPID MODIFICATION%GOBP%GO:0030258	79	-0.733935	-1.72848	0	0.0666303	1	1696
102	FATTY ACID METABOLISM%REACTOME%R-HSA-8978868.5	87	-0.67571	-1.72366	0	0.0695476	1	1828
103	HALLMARK_ADIPOGENESIS%MSIGDB_C2%HALLMARK_ADIPOGENESIS	131	-0.552344	-1.72107	0	0.0709716	1	1568
104	BRANCHED-CHAIN AMINO ACID CATABOLISM%REACTOME%R-HSA-70895.4	15	-0.445499	-1.71672	0.00798722	0.0735951	1	1515
105	MITOCHONDRIAL TRANSPORT%GOBP%GO:0006839	96	-0.683986	-1.70973	0	0.079039	1	1904
106	NEGATIVE REGULATION OF ENDOTHELIAL CELL PROLIFERATION%GOBP%GO:0001937	20	-0.631499	-1.70625	0.00798722	0.0811338	1	684
107	PROTEIN O-LINKED GLYCOSYLATION%GOBP%GO:0006493	39	-0.578549	-1.70427	0.00291121	0.0822063	1	1470
108	CARBOHYDRATE DERIVATIVE BIOSYNTHETIC PROCESS%GOBP%GO:1901137	287	-0.491118	-1.70157	0	0.0838499	1	1814
109	NEGATIVE REGULATION OF RESPONSE TO ENDOPLASMIC RETICULUM STRESS%GOBP%GO:1903573	28	-0.538266	-1.7011	0.00294551	0.0835775	1	973
110	BIOLOGICAL OXIDATIONS%REACTOME%R-HSA-211859.2	100	-0.646901	-1.69851	0.00125313	0.085351	1	1746
111	PROTEIN TARGETING TO MITOCHONDRION%GOBP%GO:0006626	33	-0.745205	-1.67667	0.00304414	0.106885	1	1882
112	PYRUVATE METABOLIC PROCESS%GOBP%GO:0006090	48	-0.681789	-1.67291	0.00280505	0.110182	1	1150
113	PURINE-CONTAINING COMPOUND METABOLIC PROCESS%GOBP%GO:0072521	247	-0.648988	-1.67134	0	0.111036	1	1828
114	MITOCHONDRIAL COMPLEX I ASSEMBLY MODEL OXPHOS SYSTEM%WIKIPATHWAYS_20210210%WP4324%HOMO SAPIENS	28	-0.698978	-1.67115	0.00589102	0.110253	1	1511
115	PHOSPHOLIPID CATABOLIC PROCESS%GOBP%GO:0009395	18	-0.624316	-1.66706	0.00916031	0.113772	1	1548
116	CAMP-MEDIATED SIGNALING%GOBP%GO:0019933	38	-0.709551	-1.66639	0.00420168	0.113575	1	1503
117	METABOLISM OF STEROIDS%REACTOME%R-HSA-8957322.2	64	-0.625198	-1.66487	0.00275103	0.114369	1	1761
118	POSITIVE REGULATION OF SPROUTING ANGIOGENESIS%GOBP%GO:1903672	17	-0.516944	-1.66349	0.0108192	0.115079	1	775
119	STRIATED MUSCLE CONTRACTION%GOBP%GO:0006941	30	-0.639478	-1.66002	0.00892857	0.117877	1	988
120	PROTEOGLYCAN METABOLIC PROCESS%GOBP%GO:0006029	42	-0.56909	-1.65957	0.00290698	0.117465	1	948
121	STEROL METABOLIC PROCESS%GOBP%GO:0016125	44	-0.678186	-1.65938	0.00281294	0.116662	1	1769
122	TRANSLATION OF STRUCTURAL PROTEINS%REACTOME DATABASE ID RELEASE 75%9694635	31	-0.549263	-1.65199	0.00728863	0.12459	1	1868
123	CHOLESTEROL METABOLIC PROCESS%GOBP%GO:0008203	42	-0.505687	-1.65036	0.00421348	0.125651	1	1751
124	CHOLESTEROL METABOLISM (INCLUDES BOTH BLOCH AND KANDUTSCH-RUSSELL PATHWAYS)%WIKIPATHWAYS_20210210%WP4718%HOMO SAPIENS	25	-0.687721	-1.64852	0.0105105	0.126727	1	1721
125	LIPID METABOLIC PROCESS%GOBP%GO:0006629	427	-0.704029	-1.64521	0	0.129899	1	1586
126	T CELL DIFFERENTIATION%GOBP%GO:0030217	18	-0.614037	-1.64242	0.0048	0.13291	1	1016
127	SECONDARY ALCOHOL METABOLIC PROCESS%GOBP%GO:1902652	42	-0.683283	-1.64042	0.00413793	0.134595	1	1751
128	ADENYLATE CYCLASE-ACTIVATING G PROTEIN-COUPLED RECEPTOR SIGNALING PATHWAY%GOBP%GO:0007189	30	-0.670658	-1.63979	0.0116618	0.134505	1	1503
129	PROTEIN LOCALIZATION TO MITOCHONDRION%GOBP%GO:0070585	39	-0.60019	-1.63612	0.00703235	0.138536	1	1882
130	PROTEOGLYCAN BIOSYNTHETIC PROCESS%GOBP%GO:0030166	31	-0.658898	-1.63605	0.00869565	0.137602	1	668
131	REGULATION OF SMOOTHENED SIGNALING PATHWAY%GOBP%GO:0008589	20	-0.613037	-1.63518	0.00914634	0.137722	1	679
132	AMINOGLYCAN BIOSYNTHETIC PROCESS%GOBP%GO:0006023	63	-0.43988	-1.6338	0.00131926	0.138551	1	1361
133	CELL FATE COMMITMENT%GOBP%GO:0045165	29	-0.711531	-1.63068	0.0117994	0.141726	1	638
134	ESTABLISHMENT OF PROTEIN LOCALIZATION TO MITOCHONDRION%GOBP%GO:0072655	37	-0.569661	-1.62267	0.0102639	0.15205	1	1882
135	REGULATION OF MUSCLE CONTRACTION%GOBP%GO:0006937	48	-0.564099	-1.61721	0.00696379	0.15925	1	988
136	LEUKOCYTE CHEMOTAXIS%GOBP%GO:0030595	44	-0.49679	-1.61711	0.00985915	0.158245	1	999
137	NUCLEOTIDE METABOLIC PROCESS%GOBP%GO:0009117	287	-0.675828	-1.6151	0	0.159925	1	1850
138	POSITIVE REGULATION OF SMOOTH MUSCLE CELL PROLIFERATION%GOBP%GO:0048661	24	-0.519181	-1.61338	0.019697	0.161498	1	881
139	NUCLEOSIDE PHOSPHATE METABOLIC PROCESS%GOBP%GO:0006753	292	-0.550154	-1.61224	0	0.161916	1	1850
140	TCA CYCLE AND DEFICIENCY OF PYRUVATE DEHYDROGENASE COMPLEX (PDHC)%WIKIPATHWAYS_20210210%WP2453%HOMO SAPIENS	16	-0.613037	-1.6104	0.0113452	0.163499	1	1584
141	SYNTHESIS OF BILE ACIDS AND BILE SALTS%REACTOME DATABASE ID RELEASE 75%192105	15	-0.637638	-1.60849	0.0279146	0.165178	1	1562
142	PLASMA LIPOPROTEIN REMODELING%REACTOME DATABASE ID RELEASE 75%8963899	20	-0.706255	-1.60666	0.011041	0.166954	1	989
143	GPCR LIGAND BINDING%REACTOME%R-HSA-500792.3	45	-0.565469	-1.6057	0.00696379	0.167362	1	1463
144	DETECTION OF STIMULUS INVOLVED IN SENSORY PERCEPTION%GOBP%GO:0050906	18	-0.689669	-1.60133	0.0231125	0.173241	1	1003
145	FATTY ACID &BETA;-OXIDATION I%HUMANCYC%FAO-PWY	15	-0.564384	-1.60034	0.0174603	0.17372	1	1024
146	CHONDROITIN SULFATE PROTEOGLYCAN BIOSYNTHETIC PROCESS%GOBP%GO:0050650	16	-0.494312	-1.59838	0.0175159	0.17564	1	411
147	BILE ACID AND BILE SALT METABOLISM%REACTOME%R-HSA-194068.1	16	-0.552858	-1.59538	0.0254372	0.179562	1	1683
148	HIF-1-ALPHA TRANSCRIPTION FACTOR NETWORK%PATHWAY INTERACTION DATABASE NCI-NATURE CURATED DATA%HIF-1-ALPHA TRANSCRIPTION FACTOR NETWORK	36	-0.450325	-1.59264	0.0185714	0.183037	1	979
149	ALCOHOL METABOLIC PROCESS%GOBP%GO:0006066	122	-0.672415	-1.59097	0.00122249	0.184352	1	1578
150	CYCLIC-NUCLEOTIDE-MEDIATED SIGNALING%GOBP%GO:0019935	43	-0.488311	-1.5907	0.0140449	0.183633	1	1503
151	MITOCHONDRIAL LC-FATTY ACID BETA-OXIDATION%WIKIPATHWAYS_20210210%WP368%HOMO SAPIENS	15	-0.689669	-1.58534	0.0210356	0.191939	1	1676
152	PEPTIDYL-ASPARAGINE MODIFICATION%GOBP%GO:0018196	20	-0.444837	-1.58435	0.0205696	0.192317	1	1783
153	ATP BIOSYNTHETIC PROCESS%GOBP%GO:0006754	42	-0.627404	-1.58381	0.0218579	0.192021	1	1850
154	RESPIRATORY TUBE DEVELOPMENT%GOBP%GO:0030323	18	-0.682069	-1.58236	0.0167173	0.193426	1	1369
155	POSITIVE REGULATION OF DNA BIOSYNTHETIC PROCESS%GOBP%GO:2000573	37	-0.531932	-1.58184	0.0128205	0.193139	1	666
156	PID_HIF1_TFPATHWAY%MSIGDB_C2%PID_HIF1_TFPATHWAY	36	-0.637638	-1.5797	0.0143885	0.195726	1	979
157	REGULATION OF CELL MIGRATION INVOLVED IN SPROUTING ANGIOGENESIS%GOBP%GO:0090049	15	-0.503904	-1.57741	0.0196721	0.198445	1	775
158	RESPONSE TO LIPOPROTEIN PARTICLE%GOBP%GO:0055094	15	-0.396059	-1.57729	0.0338983	0.197379	1	34
159	NEGATIVE REGULATION OF T CELL ACTIVATION%GOBP%GO:0050868	28	-0.569097	-1.57329	0.0162963	0.203439	1	754
160	CELLULAR KETONE METABOLIC PROCESS%GOBP%GO:0042180	19	-0.577858	-1.57289	0.0247525	0.202849	1	997
161	INTEGRIN CELL SURFACE INTERACTIONS%REACTOME%R-HSA-216083.3	53	-0.441935	-1.57196	0.00675676	0.203441	1	803
162	POSITIVE REGULATION OF LEUKOCYTE MIGRATION%GOBP%GO:0002687	54	-0.610208	-1.56838	0.0108548	0.208805	1	938
163	NEGATIVE REGULATION OF MONONUCLEAR CELL PROLIFERATION%GOBP%GO:0032945	22	-0.63357	-1.56602	0.02118	0.212174	1	945
164	ACTIN-MEDIATED CELL CONTRACTION%GOBP%GO:0070252	44	-0.56575	-1.56317	0.0152144	0.216434	1	1037
165	MEMBRANE LIPID METABOLIC PROCESS%GOBP%GO:0006643	71	-0.440331	-1.55893	0.011658	0.223536	1	1575
166	CELLULAR LIPID METABOLIC PROCESS%GOBP%GO:0044255	366	-0.440651	-1.5578	0	0.224385	1	1586
167	AMINO ACID METABOLISM%WIKIPATHWAYS_20210210%WP3925%HOMO SAPIENS	74	-0.552863	-1.55599	0.00772201	0.226648	1	1713
168	RESPONSE TO XENOBIOTIC STIMULUS%GOBP%GO:0009410	53	-0.484683	-1.55368	0.0160643	0.229765	1	1144
169	MITOCHONDRIAL MEMBRANE ORGANIZATION%GOBP%GO:0007006	63	-0.531083	-1.54947	0.0147849	0.237096	1	1726
170	AMINOGLYCAN METABOLIC PROCESS%GOBP%GO:0006022	89	-0.68848	-1.54796	0.00375469	0.238966	1	1361
171	O-LINKED GLYCOSYLATION%REACTOME%R-HSA-5173105.4	46	-0.510988	-1.54631	0.011544	0.241205	1	1421
172	CALCIUM-DEPENDENT CELL-CELL ADHESION VIA PLASMA MEMBRANE CELL ADHESION MOLECULES%GOBP%GO:0016339	15	-0.488079	-1.54444	0.0288462	0.243713	1	1170
173	CHOLESTEROL BIOSYNTHESIS%REACTOME DATABASE ID RELEASE 75%191273	15	-0.673118	-1.53944	0.0340909	0.253573	1	1721
174	POSITIVE REGULATION OF ADAPTIVE IMMUNE RESPONSE BASED ON SOMATIC RECOMBINATION OF IMMUNE RECEPTORS BUILT FROM IMMUNOGLOBULIN SUPERFAMILY DOMAINS%GOBP%GO:0002824	31	-0.652659	-1.53872	0.0247453	0.2536	1	754
175	ALPHA-AMINO ACID METABOLIC PROCESS%GOBP%GO:1901605	121	-0.699049	-1.53859	0.00487211	0.252378	1	1904
176	CELL CHEMOTAXIS%GOBP%GO:0060326	66	-0.646748	-1.53822	0.0201072	0.251771	1	1454
177	SECOND-MESSENGER-MEDIATED SIGNALING%GOBP%GO:0019932	93	-0.580434	-1.53547	0.0136816	0.256432	1	1503
178	CHONDROITIN SULFATE METABOLIC PROCESS%GOBP%GO:0030204	21	-0.610208	-1.5354	0.0353846	0.25516	1	948
179	LUNG DEVELOPMENT%GOBP%GO:0030324	17	-0.431093	-1.53443	0.0213415	0.255692	1	1369
180	NEGATIVE REGULATION OF T CELL PROLIFERATION%GOBP%GO:0042130	17	-0.596236	-1.52774	0.0396825	0.269219	1	754
181	O-GLYCAN PROCESSING%GOBP%GO:0016266	26	-0.616835	-1.52689	0.0393939	0.269678	1	1421
182	ORGANIC HYDROXY COMPOUND METABOLIC PROCESS%GOBP%GO:1901615	158	-0.608405	-1.52379	0.00236407	0.275207	1	1578
183	ORGANIC HYDROXY COMPOUND BIOSYNTHETIC PROCESS%GOBP%GO:1901617	69	-0.68848	-1.52345	0.0157895	0.274557	1	1001
184	O-LINKED GLYCOSYLATION OF MUCINS%REACTOME%R-HSA-913709.3	25	-0.440651	-1.52307	0.0213415	0.273971	1	1421
185	PURINE NUCLEOSIDE TRIPHOSPHATE BIOSYNTHETIC PROCESS%GOBP%GO:0009145	44	-0.68848	-1.52025	0.0275862	0.279234	1	1850
186	ACTIN-MYOSIN FILAMENT SLIDING%GOBP%GO:0033275	25	-0.597725	-1.51771	0.0340031	0.283498	1	1378
187	REGULATION OF PHOSPHOLIPASE ACTIVITY%GOBP%GO:0010517	30	-0.571859	-1.51743	0.0357654	0.282676	1	989
188	REGULATION OF CYCLIN-DEPENDENT PROTEIN KINASE ACTIVITY%GOBP%GO:1904029	26	-0.586461	-1.51222	0.0291859	0.293592	1	696
189	CHONDROITIN SULFATE PROTEOGLYCAN METABOLIC PROCESS%GOBP%GO:0050654	23	-0.557378	-1.5115	0.0455927	0.293817	1	948
190	REGULATION OF ADAPTIVE IMMUNE RESPONSE BASED ON SOMATIC RECOMBINATION OF IMMUNE RECEPTORS BUILT FROM IMMUNOGLOBULIN SUPERFAMILY DOMAINS%GOBP%GO:0002822	43	-0.464207	-1.51119	0.0324859	0.29291	1	1016
191	POSITIVE REGULATION OF ADAPTIVE IMMUNE RESPONSE%GOBP%GO:0002821	33	-0.538344	-1.51108	0.0342772	0.291635	1	754
192	REGULATION OF PROTEIN PROCESSING%GOBP%GO:0070613	64	-0.557378	-1.51021	0.0172872	0.292138	1	910
193	IMMUNOREGULATORY INTERACTIONS BETWEEN A LYMPHOID AND A NON-LYMPHOID CELL%REACTOME%R-HSA-198933.6	38	-0.675613	-1.50979	0.0413105	0.291501	1	883
194	AROMATIC AMINO ACID FAMILY METABOLIC PROCESS%GOBP%GO:0009072	16	-0.620281	-1.50934	0.0334395	0.291029	1	1862
195	MUSCLE FILAMENT SLIDING%GOBP%GO:0030049	25	-0.68848	-1.50919	0.04	0.28996	1	1378
196	TYROBP CAUSAL NETWORK%WIKIPATHWAYS_20210210%WP3945%HOMO SAPIENS	31	-0.641861	-1.50775	0.0363901	0.291759	1	1553
197	NUCLEOBASE-CONTAINING SMALL MOLECULE METABOLIC PROCESS%GOBP%GO:0055086	349	-0.448184	-1.50391	0.00105597	0.299683	1	1850
198	GLYCOSPHINGOLIPID METABOLIC PROCESS%GOBP%GO:0006687	28	-0.459864	-1.50343	0.0375375	0.299284	1	865
199	PURINE RIBONUCLEOSIDE TRIPHOSPHATE BIOSYNTHETIC PROCESS%GOBP%GO:0009206	44	-0.52717	-1.50175	0.021645	0.301887	1	1850
200	LIPOPROTEIN METABOLISM%REACTOME%R-HSA-174824.4	49	-0.621923	-1.50086	0.0194175	0.302679	1	989
201	METABOLISM OF LIPIDS%REACTOME%R-HSA-556833.7	310	-0.52509	-1.50065	0	0.301618	1	1683
202	CELL REDOX HOMEOSTASIS%GOBP%GO:0045454	24	-0.502414	-1.50001	0.0495356	0.301675	1	1874
203	REGULATION OF PROTEIN MATURATION%GOBP%GO:1903317	64	-0.630894	-1.49803	0.0198413	0.305223	1	910
204	CELLULAR AMINO ACID METABOLIC PROCESS%GOBP%GO:0006520	166	-0.633919	-1.4968	0.00345224	0.306628	1	1904
205	REGULATION OF ACUTE INFLAMMATORY RESPONSE%GOBP%GO:0002673	52	-0.678284	-1.49599	0.024032	0.30715	1	910
206	CARDIAC MUSCLE CELL ACTION POTENTIAL%GOBP%GO:0086001	15	-0.403408	-1.49582	0.038835	0.3061	1	988
207	ASSOCIATION OF TRIC CCT WITH TARGET PROTEINS DURING BIOSYNTHESIS%REACTOME DATABASE ID RELEASE 75%390471	23	-0.465145	-1.49451	0.0483384	0.307819	1	558
208	PROTEIN N-LINKED GLYCOSYLATION VIA ASPARAGINE%GOBP%GO:0018279	19	-0.595019	-1.49439	0.0319328	0.306674	1	1783
209	NADH METABOLIC PROCESS%GOBP%GO:0006734	28	-0.62261	-1.49435	0.0387481	0.305315	1	1850
210	MEMBRANE LIPID BIOSYNTHETIC PROCESS%GOBP%GO:0046467	37	-0.439542	-1.49295	0.0183876	0.307405	1	1334
211	REGULATION OF LEUKOCYTE APOPTOTIC PROCESS%GOBP%GO:2000106	21	-0.500472	-1.49178	0.0522979	0.308876	1	1409
212	CARDIAC MUSCLE CONTRACTION%GOBP%GO:0060048	24	-0.585719	-1.49141	0.0493631	0.308408	1	988
213	PEROXISOMAL PROTEIN IMPORT%REACTOME%R-HSA-9033241.3	31	-0.406964	-1.49132	0.0334302	0.307164	1	1479
214	NEGATIVE REGULATION OF LIPID LOCALIZATION%GOBP%GO:1905953	21	-0.533032	-1.49117	0.0491284	0.306079	1	989
215	CLASS A 1 (RHODOPSIN-LIKE RECEPTORS)%REACTOME%R-HSA-373076.8	27	-0.505439	-1.48839	0.0458015	0.311436	1	1394
216	NEGATIVE REGULATION OF LYMPHOCYTE PROLIFERATION%GOBP%GO:0050672	21	-0.502414	-1.4859	0.0428135	0.316181	1	945
217	POSITIVE REGULATION OF LIPASE ACTIVITY%GOBP%GO:0060193	29	-0.414531	-1.48519	0.0295858	0.31635	1	989
218	SUPERPATHWAY OF CHOLESTEROL BIOSYNTHESIS%HUMANCYC%PWY66-5	20	-0.647082	-1.48451	0.0522152	0.316593	1	1818
219	CADHERIN SIGNALING PATHWAY%PANTHER PATHWAY%P00012	33	-0.544728	-1.48344	0.0352423	0.317926	1	1447
220	MUSCLE CONTRACTION%REACTOME%R-HSA-397014.3	79	-0.582079	-1.48149	0.012987	0.321334	1	988
221	REGULATION OF LIPID STORAGE%GOBP%GO:0010883	21	-0.624207	-1.48138	0.0477658	0.320176	1	961
222	REGULATION OF HORMONE LEVELS%GOBP%GO:0010817	141	-0.576481	-1.48135	0.00934579	0.318812	1	1562
223	REGULATION OF CHOLESTEROL TRANSPORT%GOBP%GO:0032374	28	-0.490293	-1.48082	0.042963	0.318694	1	1688
224	MYOGENESIS%REACTOME%R-HSA-525793.2	15	-0.47881	-1.47912	0.0482315	0.321445	1	881
225	PEPTIDYL-LYSINE ACETYLATION%GOBP%GO:0018394	20	-0.447777	-1.47664	0.0461049	0.326465	1	679
226	TERPENOID METABOLIC PROCESS%GOBP%GO:0006721	49	-0.426826	-1.47572	0.0292943	0.327329	1	989
227	REGULATION OF STRIATED MUSCLE CONTRACTION%GOBP%GO:0006942	34	-0.576102	-1.47572	0.035868	0.325887	1	988
228	POSITIVE REGULATION OF LEUKOCYTE CHEMOTAXIS%GOBP%GO:0002690	38	-0.529665	-1.4755	0.028777	0.324956	1	1656
229	REGULATION OF STEROL TRANSPORT%GOBP%GO:0032371	28	-0.5974	-1.47335	0.0279001	0.329072	1	1688
230	CELLULAR RESPONSE TO XENOBIOTIC STIMULUS%GOBP%GO:0071466	51	-0.539577	-1.47132	0.0234807	0.332755	1	1144
231	STRIATED MUSCLE CONTRACTION%REACTOME%R-HSA-390522.1	20	-0.399117	-1.46553	0.0406627	0.346413	1	891
232	POSITIVE REGULATION OF T CELL MEDIATED IMMUNITY%GOBP%GO:0002711	23	-0.552702	-1.46537	0.04	0.345402	1	754
233	DISEASES OF HEMOSTASIS%REACTOME%R-HSA-9671793.2	16	-0.438967	-1.46413	0.0695793	0.347203	1	1559
234	GLYCOSAMINOGLYCAN BIOSYNTHETIC PROCESS%GOBP%GO:0006024	60	-0.431077	-1.46303	0.0223097	0.348733	1	1361
235	NEGATIVE REGULATION OF LEUKOCYTE ACTIVATION%GOBP%GO:0002695	45	-0.445456	-1.46223	0.0336134	0.34939	1	1426
236	VEGFR2 MEDIATED VASCULAR PERMEABILITY%REACTOME DATABASE ID RELEASE 75%5218920	17	-0.483697	-1.462	0.0658307	0.34847	1	173
237	MUSCLE SYSTEM PROCESS%GOBP%GO:0003012	91	-0.408385	-1.46067	0.0178571	0.350457	1	1791
238	DICARBOXYLIC ACID METABOLIC PROCESS%GOBP%GO:0043648	45	-0.55537	-1.46066	0.0390516	0.348997	1	1855
239	POSITIVE REGULATION OF EXTRINSIC APOPTOTIC SIGNALING PATHWAY%GOBP%GO:2001238	17	-0.635404	-1.45868	0.056338	0.352881	1	587
240	UNSATURATED FATTY ACID METABOLIC PROCESS%GOBP%GO:0033559	46	-0.529665	-1.45755	0.0382514	0.354572	1	1092
241	ACYL-COA METABOLIC PROCESS%GOBP%GO:0006637	44	-0.617945	-1.45598	0.0248963	0.357239	1	1828
242	POTASSIUM CHANNELS%REACTOME%R-HSA-1296071.2	15	-0.436185	-1.45553	0.0657051	0.357057	1	888
243	NEGATIVE REGULATION OF EPITHELIAL CELL PROLIFERATION%GOBP%GO:0050680	42	-0.473448	-1.45496	0.0328571	0.357253	1	684
244	DEFECTS OF FORMATION OF FIBRIN CLOT (CLOTTING CASCADE)%REACTOME DATABASE ID RELEASE 75%9651496	16	-0.50962	-1.45374	0.0635659	0.359057	1	1559
245	MIDBRAIN DEVELOPMENT%GOBP%GO:0030901	33	-0.428866	-1.45242	0.0541353	0.361306	1	938
246	NEGATIVE REGULATION OF BLOOD VESSEL ENDOTHELIAL CELL MIGRATION%GOBP%GO:0043537	17	-0.554074	-1.45188	0.0616333	0.36129	1	666
247	THIOESTER METABOLIC PROCESS%GOBP%GO:0035383	44	-0.462725	-1.45086	0.0434783	0.36259	1	1828
248	SYNDECAN-4-MEDIATED SIGNALING EVENTS%PATHWAY INTERACTION DATABASE NCI-NATURE CURATED DATA%SYNDECAN-4-MEDIATED SIGNALING EVENTS	28	-0.612864	-1.44782	0.0571429	0.369208	1	784
249	BILE ACID METABOLIC PROCESS%GOBP%GO:0008206	17	-0.50103	-1.44664	0.0516432	0.370937	1	1562
250	NEGATIVE REGULATION OF LEUKOCYTE CELL-CELL ADHESION%GOBP%GO:1903038	32	-0.479604	-1.44614	0.0461997	0.370769	1	754
251	HISTONE METHYLATION%GOBP%GO:0016571	26	-0.533687	-1.44552	0.0557229	0.370995	1	679
252	CHONDROITIN SULFATE DERMATAN SULFATE METABOLISM%REACTOME DATABASE ID RELEASE 75%1793185	34	-0.583277	-1.4438	0.0385185	0.374163	1	948
253	NUCLEOSIDE TRIPHOSPHATE BIOSYNTHETIC PROCESS%GOBP%GO:0009142	52	-0.413992	-1.44275	0.0340599	0.375655	1	1850
254	REGULATION OF ADAPTIVE IMMUNE RESPONSE%GOBP%GO:0002819	47	-0.510923	-1.44143	0.0395634	0.377946	1	1016
255	REGULATION OF FIBROBLAST MIGRATION%GOBP%GO:0010762	16	-0.560087	-1.441	0.0613893	0.377573	1	666
256	REGULATION OF T CELL PROLIFERATION%GOBP%GO:0042129	52	-0.537095	-1.44035	0.0381992	0.377862	1	754
257	MUSCLE CONTRACTION%GOBP%GO:0006936	81	-0.589309	-1.43898	0.030343	0.380195	1	988
258	HEART CONTRACTION%GOBP%GO:0060047	29	-0.569645	-1.43852	0.0434783	0.37999	1	1023
259	REGULATION OF LEUKOCYTE CELL-CELL ADHESION%GOBP%GO:1903037	108	-0.505599	-1.43809	0.0191617	0.379735	1	1016
260	LIPID BIOSYNTHETIC PROCESS%GOBP%GO:0008610	211	-0.555781	-1.43683	0.00554324	0.381649	1	1586
261	NEGATIVE REGULATION OF CELL ACTIVATION%GOBP%GO:0050866	58	-0.55537	-1.4365	0.0360963	0.381168	1	1426
262	CERAMIDE METABOLIC PROCESS%GOBP%GO:0006672	30	-0.459894	-1.43596	0.0565217	0.381236	1	1483
263	NEGATIVE REGULATION OF LEUKOCYTE PROLIFERATION%GOBP%GO:0070664	26	-0.51061	-1.43521	0.0458015	0.381954	1	945
264	NEGATIVE REGULATION OF ENDOTHELIAL CELL MIGRATION%GOBP%GO:0010596	25	-0.410847	-1.43246	0.0547112	0.388638	1	666
265	EPITHELIAL CELL PROLIFERATION%GOBP%GO:0050673	18	-0.437717	-1.43239	0.0734375	0.387358	1	675
266	INTRACELLULAR PROTEIN TRANSMEMBRANE TRANSPORT%GOBP%GO:0065002	26	-0.584718	-1.43237	0.061747	0.385953	1	1636
267	POSITIVE REGULATION OF STEROL TRANSPORT%GOBP%GO:0032373	17	-0.444894	-1.43134	0.0668693	0.38746	1	1688
268	OLIGOSACCHARIDE METABOLIC PROCESS%GOBP%GO:0009311	24	-0.391632	-1.43028	0.0498442	0.389031	1	1757
269	POSITIVE REGULATION OF TRANSMEMBRANE RECEPTOR PROTEIN SERINE/THREONINE KINASE SIGNALING PATHWAY%GOBP%GO:0090100	37	-0.410381	-1.43004	0.0506329	0.388288	1	710
270	HALLMARK_HEME_METABOLISM%MSIGDB_C2%HALLMARK_HEME_METABOLISM	106	-0.396832	-1.42934	0.0244798	0.388814	1	1544
271	NEGATIVE REGULATION OF PROTEIN MATURATION%GOBP%GO:1903318	19	-0.615053	-1.42892	0.0636646	0.388526	1	563
272	REGULATION OF MONONUCLEAR CELL PROLIFERATION%GOBP%GO:0032944	67	-0.589078	-1.42847	0.0320856	0.388376	1	787
273	GLYCOSAMINOGLYCAN METABOLIC PROCESS%GOBP%GO:0030203	82	-0.567423	-1.42813	0.0305732	0.387973	1	1361
274	REGULATION OF INSULIN SECRETION%GOBP%GO:0050796	39	-0.562618	-1.42621	0.0458971	0.392158	1	1419
275	PROTEIN TRANSMEMBRANE TRANSPORT%GOBP%GO:0071806	29	-0.421657	-1.42556	0.0554765	0.392635	1	1636
276	POSITIVE REGULATION OF CHOLESTEROL TRANSPORT%GOBP%GO:0032376	17	-0.550596	-1.42438	0.0639269	0.39456	1	1688
277	HEMATOPOIETIC OR LYMPHOID ORGAN DEVELOPMENT%GOBP%GO:0048534	131	-0.543801	-1.42436	0.0152225	0.393198	1	1427
278	POSITIVE REGULATION OF LYMPHOCYTE MEDIATED IMMUNITY%GOBP%GO:0002708	33	-0.586831	-1.42429	0.0526316	0.391978	1	754
279	POSITIVE REGULATION OF COLD-INDUCED THERMOGENESIS%GOBP%GO:0120162	36	-0.563592	-1.42399	0.0560345	0.39145	1	1676
280	COLLAGEN CATABOLIC PROCESS%GOBP%GO:0030574	19	-0.53293	-1.42319	0.0792683	0.392305	1	617
281	NUCLEOSIDE BISPHOSPHATE METABOLIC PROCESS%GOBP%GO:0033865	61	-0.4616	-1.42298	0.0317241	0.391502	1	1828
282	REACTIVE OXYGEN SPECIES METABOLIC PROCESS%GOBP%GO:0072593	47	-0.423209	-1.42222	0.0363129	0.392325	1	1841
283	N-GLYCAN TRIMMING IN THE ER AND CALNEXIN CALRETICULIN CYCLE%REACTOME%R-HSA-532668.2	21	-0.376728	-1.42163	0.0624	0.392541	1	1900
284	POSITIVE REGULATION OF TELOMERASE ACTIVITY%GOBP%GO:0051973	18	-0.584398	-1.42111	0.0783034	0.392598	1	1194
285	POSITIVE REGULATION OF SIGNAL TRANSDUCTION BY P53 CLASS MEDIATOR%GOBP%GO:1901798	15	-0.602961	-1.42067	0.0768	0.392401	1	30
286	PURINE NUCLEOSIDE BISPHOSPHATE METABOLIC PROCESS%GOBP%GO:0034032	61	-0.40821	-1.41902	0.0382082	0.395722	1	1828
287	CARDIAC CONDUCTION%REACTOME%R-HSA-5576891.2	35	-0.446685	-1.41767	0.0596798	0.398143	1	715
288	GLYCOSYL COMPOUND CATABOLIC PROCESS%GOBP%GO:1901658	22	-0.444894	-1.41568	0.0695518	0.402543	1	1483
289	RIBONUCLEOSIDE BISPHOSPHATE METABOLIC PROCESS%GOBP%GO:0033875	61	-0.471679	-1.41477	0.0357143	0.403843	1	1828
290	PID_SYNDECAN_4_PATHWAY%MSIGDB_C2%PID_SYNDECAN_4_PATHWAY	28	-0.368529	-1.41404	0.0725076	0.404582	1	784
291	REGULATION OF HEART RATE%GOBP%GO:0002027	25	-0.579355	-1.41328	0.065449	0.405349	1	880
292	NEGATIVE REGULATION OF LYMPHOCYTE ACTIVATION%GOBP%GO:0051250	37	-0.491111	-1.41308	0.0673499	0.404593	1	945
293	PRE-NOTCH PROCESSING IN GOLGI%REACTOME DATABASE ID RELEASE 75%1912420	15	-0.505242	-1.41216	0.0805153	0.405951	1	608
294	NEGATIVE REGULATION OF PROTEIN PROCESSING%GOBP%GO:0010955	19	-0.465624	-1.41007	0.0765625	0.410615	1	563
295	STEROL BIOSYNTHETIC PROCESS%GOBP%GO:0016126	22	-0.563909	-1.40922	0.0589172	0.411768	1	1721
296	BIOCARTA_AMI_PATHWAY%MSIGDB_C2%BIOCARTA_AMI_PATHWAY	19	-0.505634	-1.40875	0.0854839	0.411714	1	781
297	ACTION POTENTIAL%GOBP%GO:0001508	24	-0.501036	-1.40869	0.0670471	0.410502	1	988
298	GLYCOLYTIC PROCESS THROUGH FRUCTOSE-6-PHOSPHATE%GOBP%GO:0061615	23	-0.572088	-1.40795	0.0795632	0.411291	1	1850
299	CELLULAR RESPONSE TO LIPOPROTEIN PARTICLE STIMULUS%GOBP%GO:0071402	16	-0.542752	-1.40722	0.0843558	0.411964	1	34
300	BIOCARTA_NO1_PATHWAY%MSIGDB_C2%BIOCARTA_NO1_PATHWAY	18	-0.606255	-1.40441	0.0743671	0.418916	1	700
301	STRIATED MUSCLE CONTRACTION PATHWAY%WIKIPATHWAYS_20210210%WP383%HOMO SAPIENS	24	-0.424977	-1.40307	0.0758929	0.421659	1	1723
302	PROTEIN ACETYLATION%GOBP%GO:0006473	27	-0.562759	-1.403	0.0784314	0.420465	1	679
303	TRANSCRIPTIONAL ACTIVATION OF MITOCHONDRIAL BIOGENESIS%REACTOME DATABASE ID RELEASE 75%2151201	21	-0.453156	-1.40269	0.0639626	0.420021	1	2005
304	GLYCOLYSIS AND GLUCONEOGENESIS%WIKIPATHWAYS_20210210%WP534%HOMO SAPIENS	41	-0.572088	-1.40199	0.0582386	0.4207	1	1000
305	PROTEIN HYDROXYLATION%GOBP%GO:0018126	15	-0.586937	-1.40128	0.093178	0.421338	1	1590
306	REGULATION OF PEPTIDE HORMONE SECRETION%GOBP%GO:0090276	44	-0.509177	-1.40032	0.0605634	0.422777	1	1463
307	REGULATION OF GRANULOCYTE CHEMOTAXIS%GOBP%GO:0071622	23	-0.540497	-1.40031	0.0914634	0.42142	1	1296
308	GRANULOCYTE CHEMOTAXIS%GOBP%GO:0071621	27	-0.4901	-1.39991	0.071535	0.421185	1	730
309	GLYCOLYTIC PROCESS THROUGH GLUCOSE-6-PHOSPHATE%GOBP%GO:0061620	23	-0.495352	-1.39941	0.070229	0.421285	1	1850
310	CARBOHYDRATE BIOSYNTHETIC PROCESS%GOBP%GO:0016051	65	-0.494736	-1.39928	0.0536193	0.420354	1	1946
311	GLUCOSE CATABOLIC PROCESS%GOBP%GO:0006007	23	-0.403214	-1.39766	0.0948148	0.42369	1	1850
312	PID_HIF2PATHWAY%MSIGDB_C2%PID_HIF2PATHWAY	16	-0.612864	-1.39762	0.0904836	0.422448	1	1455
313	COLLAGEN METABOLIC PROCESS%GOBP%GO:0032963	27	-0.528136	-1.39738	0.0707692	0.421767	1	1384
314	POSITIVE REGULATION OF PHOSPHOLIPASE ACTIVITY%GOBP%GO:0010518	24	-0.504876	-1.39447	0.0574887	0.428953	1	989
315	MUCOPOLYSACCHARIDE METABOLIC PROCESS%GOBP%GO:1903510	54	-0.500121	-1.39361	0.0482574	0.43019	1	1453
316	POST-TRANSLATIONAL MODIFICATION: SYNTHESIS OF GPI-ANCHORED PROTEINS%REACTOME DATABASE ID RELEASE 75%163125	37	-0.45679	-1.39302	0.0636095	0.430553	1	1678
317	DRUG CATABOLIC PROCESS%GOBP%GO:0042737	63	-0.590612	-1.39285	0.0509138	0.429735	1	1734
318	B CELL RECEPTOR SIGNALING PATHWAY%GOBP%GO:0050853	20	-0.401565	-1.39158	0.0818452	0.432309	1	1679
319	SECONDARY ALCOHOL BIOSYNTHETIC PROCESS%GOBP%GO:1902653	22	-0.543254	-1.39123	0.0665635	0.432009	1	1721
320	REGULATION OF ACTIN FILAMENT-BASED MOVEMENT%GOBP%GO:1903115	17	-0.336253	-1.39074	0.0948419	0.432121	1	675
321	ENDOPLASMIC RETICULUM UNFOLDED PROTEIN RESPONSE%GOBP%GO:0030968	45	-0.563909	-1.39069	0.0571031	0.430919	1	1784
322	REGULATION OF CD4-POSITIVE, ALPHA-BETA T CELL ACTIVATION%GOBP%GO:2000514	17	-0.475933	-1.39007	0.0977199	0.431459	1	754
323	HALLMARK_BILE_ACID_METABOLISM%MSIGDB_C2%HALLMARK_BILE_ACID_METABOLISM	47	-0.425634	-1.38959	0.0449927	0.431499	1	1558
324	HEMOPOIESIS%GOBP%GO:0030097	126	-0.417259	-1.38917	0.032967	0.431464	1	1427
325	REGULATION OF ALPHA-BETA T CELL ACTIVATION%GOBP%GO:0046634	24	-0.476463	-1.38836	0.0826833	0.432695	1	754
326	CHOLESTEROL BIOSYNTHETIC PROCESS%GOBP%GO:0006695	22	-0.431205	-1.38814	0.0714286	0.432065	1	1721
327	SPHINGOLIPID METABOLIC PROCESS%GOBP%GO:0006665	57	-0.455501	-1.38786	0.0493151	0.431573	1	1534
328	REGULATION OF HEMOSTASIS%GOBP%GO:1900046	58	-0.402441	-1.38733	0.0487484	0.431841	1	1090
329	REGULATION OF LEUKOCYTE MIGRATION%GOBP%GO:0002685	79	-0.529498	-1.38696	0.043871	0.431671	1	945
330	SIGNALING BY RETINOIC ACID%REACTOME%R-HSA-5362517.2	18	-0.592664	-1.38692	0.100962	0.430481	1	1021
331	SMALL MOLECULE BIOSYNTHETIC PROCESS%GOBP%GO:0044283	268	-0.578315	-1.38566	0.0108225	0.432789	1	1850
332	NUCLEOBASE-CONTAINING SMALL MOLECULE CATABOLIC PROCESS%GOBP%GO:0034656	21	-0.42266	-1.38508	0.0774963	0.433259	1	1435
333	ORGAN GROWTH%GOBP%GO:0035265	15	-0.402254	-1.3846	0.109677	0.433332	1	669
334	FIBRIN COMPLEMENT RECEPTOR 3 SIGNALING PATHWAY%WIKIPATHWAYS_20210210%WP4136%HOMO SAPIENS	23	-0.396442	-1.38457	0.0885093	0.432114	1	638
335	OSTEOBLAST DIFFERENTIATION%WIKIPATHWAYS_20210210%WP4787%HOMO SAPIENS	39	-0.530443	-1.38424	0.0640668	0.43182	1	1393
336	REGULATION OF SMOOTH MUSCLE CELL PROLIFERATION%GOBP%GO:0048660	40	-0.54158	-1.38417	0.0724044	0.430786	1	1496
337	REGULATION OF DNA BIOSYNTHETIC PROCESS%GOBP%GO:2000278	49	-0.465863	-1.38356	0.0729023	0.431292	1	666
338	PHAGOCYTOSIS, ENGULFMENT%GOBP%GO:0006911	20	-0.407962	-1.38201	0.100787	0.434735	1	1632
339	XENOBIOTIC METABOLIC PROCESS%GOBP%GO:0006805	45	-0.42134	-1.38169	0.0617978	0.434404	1	1144
340	NEGATIVE REGULATION OF CELL-CELL ADHESION%GOBP%GO:0022408	64	-0.532125	-1.38074	0.0527704	0.435955	1	754
341	ISOPRENOID METABOLIC PROCESS%GOBP%GO:0006720	55	-0.52877	-1.37929	0.0667557	0.439015	1	989
342	CELL-CELL ADHESION VIA PLASMA-MEMBRANE ADHESION MOLECULES%GOBP%GO:0098742	86	-0.500116	-1.37897	0.04	0.438785	1	1320
343	HIF-2-ALPHA TRANSCRIPTION FACTOR NETWORK%PATHWAY INTERACTION DATABASE NCI-NATURE CURATED DATA%HIF-2-ALPHA TRANSCRIPTION FACTOR NETWORK	16	-0.404546	-1.3779	0.107717	0.440627	1	1455
344	GLYCOSAMINOGLYCAN METABOLISM%REACTOME DATABASE ID RELEASE 75%1630316	76	-0.503494	-1.37777	0.0505689	0.439649	1	1361
345	SIGNALING EVENTS MEDIATED BY HDAC CLASS II%PATHWAY INTERACTION DATABASE NCI-NATURE CURATED DATA%SIGNALING EVENTS MEDIATED BY HDAC CLASS II	17	-0.506433	-1.37572	0.124006	0.444679	1	907
346	PHOTODYNAMIC THERAPY-INDUCED HIF-1 SURVIVAL SIGNALING%WIKIPATHWAYS_20210210%WP3614%HOMO SAPIENS	22	-0.431205	-1.37535	0.109422	0.444435	1	1496
347	G ALPHA (S) SIGNALLING EVENTS%REACTOME DATABASE ID RELEASE 75%418555	37	-0.552536	-1.37493	0.0787519	0.444522	1	1464
348	BLOOD CIRCULATION%GOBP%GO:0008015	114	-0.444045	-1.37471	0.0355392	0.443888	1	1023
349	MICROTUBULE BUNDLE FORMATION%GOBP%GO:0001578	19	-0.484175	-1.37408	0.0856698	0.444431	1	301
350	RESPIRATORY SYSTEM DEVELOPMENT%GOBP%GO:0060541	20	-0.500345	-1.37353	0.101749	0.444934	1	1369
351	PURINE RIBONUCLEOSIDE MONOPHOSPHATE BIOSYNTHETIC PROCESS%GOBP%GO:0009168	57	-0.579827	-1.3722	0.0561644	0.447625	1	1864
352	DETECTION OF CHEMICAL STIMULUS%GOBP%GO:0009593	15	-0.564635	-1.37141	0.10356	0.448789	1	150
353	REGULATION OF BLOOD COAGULATION%GOBP%GO:0030193	58	-0.464472	-1.3712	0.0813648	0.44812	1	1090
354	PID_HDAC_CLASSII_PATHWAY%MSIGDB_C2%PID_HDAC_CLASSII_PATHWAY	17	-0.415628	-1.36737	0.112878	0.458531	1	907
355	ORGANIC HYDROXY COMPOUND CATABOLIC PROCESS%GOBP%GO:1901616	24	-0.408753	-1.36714	0.107362	0.457937	1	882
356	PEPTIDYL-LYSINE METHYLATION%GOBP%GO:0018022	20	-0.428761	-1.36622	0.103343	0.459411	1	477
357	PHOTODYNAMIC THERAPY-INDUCED AP-1 SURVIVAL SIGNALING.%WIKIPATHWAYS_20210210%WP3611%HOMO SAPIENS	18	-0.419956	-1.3659	0.109524	0.459099	1	895
358	REGULATION OF CHOLESTEROL METABOLIC PROCESS%GOBP%GO:0090181	15	-0.387945	-1.36478	0.11093	0.46134	1	1504
359	GRANULOCYTE MIGRATION%GOBP%GO:0097530	33	-0.567758	-1.36432	0.0774749	0.461476	1	999
360	ANTIGEN PROCESSING AND PRESENTATION OF ENDOGENOUS ANTIGEN%GOBP%GO:0019883	16	-0.497775	-1.36417	0.106688	0.460667	1	804
361	ANTIMICROBIAL PEPTIDES%REACTOME%R-HSA-6803157.2	33	-0.492517	-1.36382	0.0854197	0.46054	1	1013
362	UREA CYCLE AND ASSOCIATED PATHWAYS%WIKIPATHWAYS_20210210%WP4595%HOMO SAPIENS	18	-0.500345	-1.36312	0.101911	0.461414	1	2430
363	RESPONSE TO RETINOIC ACID%GOBP%GO:0032526	22	-0.529877	-1.36155	0.111614	0.464936	1	1427
364	CELLULAR EXTRAVASATION%GOBP%GO:0045123	21	-0.367611	-1.36074	0.0876369	0.466367	1	1806
365	SUBSTANTIA NIGRA DEVELOPMENT%GOBP%GO:0021762	28	-0.451424	-1.35859	0.0916031	0.471747	1	899
366	POSITIVE REGULATION OF CELL KILLING%GOBP%GO:0031343	26	-0.444929	-1.35816	0.0989345	0.471775	1	938
367	E2F TRANSCRIPTION FACTOR NETWORK%PATHWAY INTERACTION DATABASE NCI-NATURE CURATED DATA%E2F TRANSCRIPTION FACTOR NETWORK	29	-0.462303	-1.35807	0.105498	0.470786	1	679
368	FATTY ACID DERIVATIVE METABOLIC PROCESS%GOBP%GO:1901568	71	-0.480851	-1.35759	0.0593668	0.471015	1	1562
369	PURINE NUCLEOSIDE MONOPHOSPHATE BIOSYNTHETIC PROCESS%GOBP%GO:0009127	57	-0.572886	-1.35644	0.0717185	0.473474	1	1864
370	GLYCOSIDE METABOLIC PROCESS%GOBP%GO:0016137	15	-0.429574	-1.35482	0.101613	0.477213	1	1562
371	PURINE RIBONUCLEOTIDE BIOSYNTHETIC PROCESS%GOBP%GO:0009152	93	-0.443701	-1.3547	0.059194	0.476283	1	1850
372	REGULATION OF LEUKOCYTE DIFFERENTIATION%GOBP%GO:1902105	64	-0.585505	-1.3545	0.0539474	0.475701	1	1000
373	BONE DEVELOPMENT%GOBP%GO:0060348	34	-0.400138	-1.35398	0.0849195	0.476122	1	1402
374	ORGANOPHOSPHATE METABOLIC PROCESS%GOBP%GO:0019637	460	-0.481117	-1.35304	0.00103306	0.47795	1	1832
375	ACTIN FILAMENT-BASED MOVEMENT%GOBP%GO:0030048	63	-0.412298	-1.35267	0.0570652	0.477895	1	1378
376	CENTRAL NERVOUS SYSTEM NEURON DIFFERENTIATION%GOBP%GO:0021953	34	-0.388294	-1.35102	0.0840456	0.481778	1	954
377	SUDDEN INFANT DEATH SYNDROME (SIDS) SUSCEPTIBILITY PATHWAYS%WIKIPATHWAYS_20210210%WP706%HOMO SAPIENS	57	-0.450789	-1.35075	0.0682731	0.481339	1	1001
378	MYELOID LEUKOCYTE MIGRATION%GOBP%GO:0097529	44	-0.473382	-1.3495	0.0764951	0.48405	1	999
379	PEPTIDE LIGAND-BINDING RECEPTORS%REACTOME%R-HSA-375276.5	23	-0.496083	-1.34943	0.0967742	0.482976	1	1394
380	PROTON TRANSMEMBRANE TRANSPORT%GOBP%GO:1902600	31	-0.471815	-1.34872	0.0915698	0.483956	1	1841
381	REGULATION OF COMPLEMENT ACTIVATION%GOBP%GO:0030449	41	-0.444929	-1.34725	0.0961811	0.487393	1	1123
382	PROTEIN TRANSMEMBRANE IMPORT INTO INTRACELLULAR ORGANELLE%GOBP%GO:0044743	16	-0.450789	-1.34551	0.134454	0.491959	1	1882
383	DNA-DEPENDENT DNA REPLICATION MAINTENANCE OF FIDELITY%GOBP%GO:0045005	15	-0.566881	-1.34472	0.133229	0.493106	1	714
384	LYMPHOCYTE DIFFERENTIATION%GOBP%GO:0030098	41	-0.444045	-1.34468	0.0774648	0.491969	1	1427
385	REGULATION OF PROTEIN ACTIVATION CASCADE%GOBP%GO:2000257	48	-0.403996	-1.34388	0.0828729	0.49332	1	910
386	WNT SIGNALING PATHWAY%PANTHER PATHWAY%P00057	120	-0.489867	-1.34386	0.0403423	0.492122	1	1454
387	REGULATION OF COAGULATION%GOBP%GO:0050818	59	-0.420797	-1.34349	0.0789826	0.492021	1	1090
388	REGULATION OF CELL-CELL ADHESION%GOBP%GO:0022407	171	-0.433202	-1.34258	0.0301974	0.493519	1	1016
389	PROTEIN-PROTEIN INTERACTIONS AT SYNAPSES%REACTOME DATABASE ID RELEASE 75%6794362	37	-0.515495	-1.34254	0.104286	0.492362	1	675
390	POSITIVE REGULATION OF STAT CASCADE%GOBP%GO:1904894	20	-0.449255	-1.3422	0.102686	0.492178	1	1619
391	PEPTIDE SECRETION%GOBP%GO:0002790	44	-0.451845	-1.34207	0.0801145	0.491319	1	720
392	NUCLEOSIDE MONOPHOSPHATE BIOSYNTHETIC PROCESS%GOBP%GO:0009124	62	-0.424138	-1.34139	0.06639	0.492246	1	1864
393	PLASMA LIPOPROTEIN PARTICLE ORGANIZATION%GOBP%GO:0071827	30	-0.493283	-1.34128	0.0880989	0.491337	1	1688
394	REGULATION OF TELOMERASE ACTIVITY%GOBP%GO:0051972	23	-0.409553	-1.34026	0.125972	0.493422	1	1194
395	METABOLIC DISORDERS OF BIOLOGICAL OXIDATION ENZYMES%REACTOME%R-HSA-5579029.2	15	-0.444664	-1.3401	0.123153	0.492637	1	1652
396	RIBONUCLEOSIDE TRIPHOSPHATE BIOSYNTHETIC PROCESS%GOBP%GO:0009201	47	-0.487677	-1.33844	0.0814917	0.49679	1	1850
397	SKELETAL SYSTEM DEVELOPMENT%GOBP%GO:0001501	111	-0.353902	-1.33821	0.0479705	0.496239	1	1449
398	STIMULI-SENSING CHANNELS%REACTOME%R-HSA-2672351.4	23	-0.474954	-1.33785	0.119808	0.496219	1	725
399	INORGANIC CATION TRANSMEMBRANE TRANSPORT%GOBP%GO:0098662	106	-0.406681	-1.33554	0.0513447	0.502709	1	1726
400	PID_E2F_PATHWAY%MSIGDB_C2%PID_E2F_PATHWAY	29	-0.415985	-1.33544	0.104777	0.501785	1	679
401	ALCOHOL BIOSYNTHETIC PROCESS%GOBP%GO:0046165	46	-0.381219	-1.33476	0.0781893	0.502695	1	1721
402	HALLMARK_ALLOGRAFT_REJECTION%MSIGDB_C2%HALLMARK_ALLOGRAFT_REJECTION	96	-0.446027	-1.33462	0.0676884	0.501954	1	1844
403	ANGIOGENESIS%WIKIPATHWAYS_20210210%WP1539%HOMO SAPIENS	20	-0.393099	-1.33436	0.116208	0.501556	1	877
404	NADH REGENERATION%GOBP%GO:0006735	22	-0.412037	-1.33382	0.115677	0.502117	1	1850
405	POSITIVE REGULATION OF REACTIVE OXYGEN SPECIES METABOLIC PROCESS%GOBP%GO:2000379	44	-0.432995	-1.3316	0.0773723	0.508077	1	677
406	KERATAN SULFATE BIOSYNTHETIC PROCESS%GOBP%GO:0018146	16	-0.552932	-1.32916	0.135179	0.514738	1	1757
407	TGF-BETA SIGNALING PATHWAY%PANTHER PATHWAY%P00052	31	-0.508705	-1.32892	0.109649	0.514298	1	710
408	METABOLIC PATHWAY OF LDL, HDL AND TG, INCLUDING DISEASES%WIKIPATHWAYS_20210210%WP4522%HOMO SAPIENS	16	-0.43393	-1.328	0.124224	0.516141	1	1468
409	REGULATION OF HOMOTYPIC CELL-CELL ADHESION%GOBP%GO:0034110	18	-0.378642	-1.32477	0.136628	0.525634	1	1090
410	REGULATION OF MUSCLE SYSTEM PROCESS%GOBP%GO:0090257	64	-0.471825	-1.32477	0.0850785	0.524359	1	1104
411	POSITIVE REGULATION OF PROTEIN COMPLEX DISASSEMBLY%GOBP%GO:0043243	17	-0.520136	-1.32366	0.119427	0.526796	1	1027
412	GLUCOSE CATABOLIC PROCESS TO PYRUVATE%GOBP%GO:0061718	22	-0.498277	-1.32322	0.111614	0.527002	1	1850
413	INTERLEUKIN-4 AND INTERLEUKIN-13 SIGNALING%REACTOME DATABASE ID RELEASE 75%6785807	48	-0.547745	-1.32139	0.0923077	0.531788	1	895
414	REGULATION OF T CELL MEDIATED IMMUNITY%GOBP%GO:0002709	27	-0.490615	-1.32118	0.126382	0.53122	1	1016
415	POSITIVE REGULATION OF VASCULATURE DEVELOPMENT%GOBP%GO:1904018	73	-0.471825	-1.32002	0.0848564	0.533825	1	1082
416	REGULATION OF T CELL MIGRATION%GOBP%GO:2000404	15	-0.537735	-1.31979	0.125418	0.533273	1	938
417	POLYSACCHARIDE BIOSYNTHETIC PROCESS%GOBP%GO:0000271	18	-0.549506	-1.31939	0.144377	0.533336	1	1281
418	NEUTROPHIL CHEMOTAXIS%GOBP%GO:0030593	25	-0.482976	-1.31917	0.105882	0.532852	1	1366
419	EXTRACELLULAR MATRIX DISASSEMBLY%GOBP%GO:0022617	45	-0.450081	-1.31893	0.0975955	0.532339	1	1147
420	KERATAN SULFATE BIOSYNTHESIS%REACTOME DATABASE ID RELEASE 75%2022854	16	-0.562476	-1.31831	0.130719	0.533287	1	1757
421	RIBOSE PHOSPHATE BIOSYNTHETIC PROCESS%GOBP%GO:0046390	105	-0.40376	-1.31825	0.0588972	0.532219	1	1850
422	MONOCARBOXYLIC ACID BIOSYNTHETIC PROCESS%GOBP%GO:0072330	93	-0.428525	-1.31796	0.0819246	0.531918	1	1479
423	ORGANOPHOSPHATE CATABOLIC PROCESS%GOBP%GO:0046434	85	-0.396314	-1.317	0.0745257	0.533893	1	1779
424	POSITIVE REGULATION OF LYMPHOCYTE MIGRATION%GOBP%GO:2000403	15	-0.397447	-1.31687	0.124417	0.533084	1	938
425	CELLULAR RESPONSE TO VASCULAR ENDOTHELIAL GROWTH FACTOR STIMULUS%GOBP%GO:0035924	21	-0.389977	-1.31682	0.129032	0.531999	1	1157
426	G PROTEIN-COUPLED RECEPTOR SIGNALING PATHWAY, COUPLED TO CYCLIC NUCLEOTIDE SECOND MESSENGER%GOBP%GO:0007187	51	-0.360239	-1.31672	0.0825566	0.531126	1	1503
427	POSITIVE REGULATION OF LEUKOCYTE CELL-CELL ADHESION%GOBP%GO:1903039	87	-0.386867	-1.31631	0.0665813	0.531359	1	1016
428	PURINE-CONTAINING COMPOUND BIOSYNTHETIC PROCESS%GOBP%GO:0072522	113	-0.454295	-1.31612	0.0592686	0.530728	1	1864
429	5-HYDROXYTRYPTAMINE DEGREDATION%PANTHER PATHWAY%P04372	15	-0.357905	-1.31603	0.143092	0.529788	1	1682
430	NUCLEOSIDE CATABOLIC PROCESS%GOBP%GO:0009164	15	-0.406681	-1.31572	0.122291	0.529556	1	1435
431	ENDOCHONDRAL OSSIFICATION WITH SKELETAL DYSPLASIAS%WIKIPATHWAYS_20210210%WP4808%HOMO SAPIENS	40	-0.437678	-1.3154	0.1	0.529419	1	957
432	RESPONSE TO GAMMA RADIATION%GOBP%GO:0010332	17	-0.45579	-1.31414	0.129134	0.532418	1	667
433	SECONDARY METABOLIC PROCESS%GOBP%GO:0019748	24	-0.491631	-1.31287	0.127596	0.535639	1	1018
434	AXON EXTENSION%GOBP%GO:0048675	15	-0.5091	-1.31218	0.156832	0.536682	1	501
435	CIRCULATORY SYSTEM PROCESS%GOBP%GO:0003013	117	-0.453488	-1.31191	0.068323	0.536335	1	1023
436	DIFFERENTIATION PATHWAY%WIKIPATHWAYS_20210210%WP2848%HOMO SAPIENS	21	-0.395458	-1.31189	0.13767	0.535217	1	1402
437	LXR-MEDIATED SIGNALING%REACTOME DATABASE ID RELEASE 75%9024446	19	-0.454676	-1.31182	0.149842	0.534243	1	1468
438	GROWTH%GOBP%GO:0040007	57	-0.346261	-1.31119	0.0934211	0.535153	1	720
439	GLUCONEOGENESIS%REACTOME DATABASE ID RELEASE 75%70263	27	-0.523782	-1.31042	0.105581	0.536538	1	1904
440	REGULATION OF WOUND HEALING%GOBP%GO:0061041	92	-0.397175	-1.30935	0.0577664	0.538848	1	1090
441	REGULATION OF LYMPHOCYTE PROLIFERATION%GOBP%GO:0050670	65	-0.556786	-1.30905	0.0713342	0.538686	1	754
442	CELLULAR POLYSACCHARIDE BIOSYNTHETIC PROCESS%GOBP%GO:0033692	18	-0.476391	-1.30733	0.135053	0.543347	1	1281
443	ENDOCHONDRAL OSSIFICATION%WIKIPATHWAYS_20210210%WP474%HOMO SAPIENS	40	-0.53606	-1.30717	0.100996	0.542658	1	957
444	MICROGLIA PATHOGEN PHAGOCYTOSIS PATHWAY%WIKIPATHWAYS_20210210%WP3937%HOMO SAPIENS	27	-0.360886	-1.30699	0.12596	0.542061	1	1687
445	RNA POLYMERASE II TRANSCRIPTION INITIATION%REACTOME%R-HSA-75953.2	21	-0.353839	-1.30684	0.147929	0.54135	1	1547
446	ALCOHOL CATABOLIC PROCESS%GOBP%GO:0046164	17	-0.396878	-1.30658	0.143556	0.541019	1	795
447	REGULATION OF HUMORAL IMMUNE RESPONSE%GOBP%GO:0002920	43	-0.523597	-1.30567	0.106892	0.542886	1	1123
448	RHO GTPASES ACTIVATE ROCKS%REACTOME DATABASE ID RELEASE 75%5627117	18	-0.416867	-1.3052	0.12989	0.543364	1	1694
449	POSITIVE REGULATION OF LEUKOCYTE DIFFERENTIATION%GOBP%GO:1902107	43	-0.479993	-1.30459	0.115774	0.544247	1	1000
450	COLUMNAR/CUBOIDAL EPITHELIAL CELL DIFFERENTIATION%GOBP%GO:0002065	16	-0.511305	-1.30453	0.144393	0.543256	1	709
451	INTRINSIC PATHWAY OF FIBRIN CLOT FORMATION%REACTOME%R-HSA-140837.8	23	-0.522861	-1.30309	0.137715	0.546863	1	1011
452	CALCIUM ION TRANSMEMBRANE TRANSPORT%GOBP%GO:0070588	36	-0.482955	-1.30282	0.116942	0.546521	1	1778
453	CANONICAL GLYCOLYSIS%GOBP%GO:0061621	22	-0.432864	-1.30274	0.130435	0.545619	1	1850
454	REGULATION OF LEUKOCYTE PROLIFERATION%GOBP%GO:0070663	75	-0.463564	-1.30207	0.0872396	0.54663	1	787
455	GLYCOSPHINGOLIPID METABOLISM%REACTOME%R-HSA-1660662.5	26	-0.388354	-1.30142	0.125915	0.547706	1	780
456	PHOSPHODIESTERASES IN NEURONAL FUNCTION%WIKIPATHWAYS_20210210%WP4222%HOMO SAPIENS	15	-0.442098	-1.30086	0.147059	0.548337	1	1464
457	RNA POLYMERASE II TRANSCRIPTION INITIATION AND PROMOTER CLEARANCE%REACTOME%R-HSA-76042.3	21	-0.424506	-1.30002	0.146379	0.549996	1	1547
458	CELL COMMUNICATION INVOLVED IN CARDIAC CONDUCTION%GOBP%GO:0086065	18	-0.44789	-1.29932	0.140888	0.551203	1	988
459	TRANSMEMBRANE RECEPTOR PROTEIN SERINE/THREONINE KINASE SIGNALING PATHWAY%GOBP%GO:0007178	68	-0.407272	-1.29921	0.0946667	0.550316	1	710
460	HISTONE LYSINE METHYLATION%GOBP%GO:0034968	18	-0.42452	-1.29918	0.1408	0.549229	1	477
461	RIBONUCLEOSIDE MONOPHOSPHATE BIOSYNTHETIC PROCESS%GOBP%GO:0009156	59	-0.398578	-1.29913	0.103723	0.548212	1	1864
462	ANTIGEN PROCESSING AND PRESENTATION OF ENDOGENOUS PEPTIDE ANTIGEN%GOBP%GO:0002483	15	-0.485679	-1.29817	0.156646	0.550223	1	1833
463	IMMUNE SYSTEM DEVELOPMENT%GOBP%GO:0002520	147	-0.430509	-1.29808	0.046875	0.549341	1	1679
464	HEPARAN SULFATE PROTEOGLYCAN METABOLIC PROCESS%GOBP%GO:0030201	18	-0.391798	-1.29649	0.151181	0.553643	1	1298
465	PURINE NUCLEOTIDE BIOSYNTHETIC PROCESS%GOBP%GO:0006164	103	-0.457694	-1.29502	0.0832282	0.557546	1	1850
466	NEURAL NUCLEUS DEVELOPMENT%GOBP%GO:0048857	29	-0.494253	-1.29323	0.141123	0.562407	1	899
467	GLOMERULUS DEVELOPMENT%GOBP%GO:0032835	22	-0.464436	-1.2932	0.152905	0.561293	1	877
468	SARS-COV-2 INFECTION%REACTOME DATABASE ID RELEASE 75%9694516	49	-0.488877	-1.29291	0.113855	0.561061	1	549
469	RIBONUCLEOTIDE BIOSYNTHETIC PROCESS%GOBP%GO:0009260	98	-0.444844	-1.29231	0.0795031	0.561899	1	1850
470	RNA POLYMERASE II PROMOTER ESCAPE%REACTOME%R-HSA-73776.3	21	-0.332326	-1.29218	0.148649	0.561146	1	1547
471	AIRWAY SMOOTH MUSCLE CELL CONTRACTION%WIKIPATHWAYS_20210210%WP4962%HOMO SAPIENS	15	-0.443093	-1.29085	0.15566	0.564605	1	700
472	OVARIAN TUMOR DOMAIN PROTEASES%REACTOME DATABASE ID RELEASE 75%5689896	17	-0.44675	-1.29064	0.158805	0.564122	1	558
473	REGULATION OF VASCULAR SMOOTH MUSCLE CELL PROLIFERATION%GOBP%GO:1904705	19	-0.534319	-1.29059	0.151424	0.56312	1	1494
474	REGULATION OF LYMPHOCYTE DIFFERENTIATION%GOBP%GO:0045619	34	-0.364955	-1.29054	0.127031	0.562109	1	1000
475	PROTEIN SECRETION%GOBP%GO:0009306	41	-0.374211	-1.29042	0.13649	0.561365	1	720
476	CELLULAR RESPONSE TO BIOTIC STIMULUS%GOBP%GO:0071216	65	-0.349758	-1.28979	0.0909091	0.562416	1	999
477	NEUTROPHIL MIGRATION%GOBP%GO:1990266	30	-0.404532	-1.28803	0.140741	0.567379	1	999
478	RNA POLYMERASE II HIV PROMOTER ESCAPE%REACTOME%R-HSA-167162.3	21	-0.399868	-1.28756	0.146032	0.567888	1	1547
479	RNA POLYMERASE II TRANSCRIPTION PRE-INITIATION AND PROMOTER OPENING%REACTOME%R-HSA-73779.2	21	-0.515308	-1.28644	0.139423	0.570615	1	1547
480	FATTY-ACYL-COA METABOLIC PROCESS%GOBP%GO:0035337	18	-0.512172	-1.28636	0.154341	0.569695	1	1828
481	FLUOROPYRIMIDINE ACTIVITY%WIKIPATHWAYS_20210210%WP1601%HOMO SAPIENS	20	-0.5214	-1.28617	0.146302	0.569207	1	740
482	LIPID LOCALIZATION%GOBP%GO:0010876	99	-0.494971	-1.28517	0.0811486	0.57145	1	989
483	PROTEIN-LIPID COMPLEX SUBUNIT ORGANIZATION%GOBP%GO:0071825	32	-0.346828	-1.28475	0.137085	0.571752	1	1688
484	POSITIVE REGULATION OF PROTEIN KINASE B SIGNALING%GOBP%GO:0051897	71	-0.544923	-1.28278	0.118825	0.577352	1	947
485	EPHB-MEDIATED FORWARD SIGNALING%REACTOME DATABASE ID RELEASE 75%3928662	28	-0.50305	-1.28124	0.140741	0.581601	1	945
486	HIV TRANSCRIPTION INITIATION%REACTOME DATABASE ID RELEASE 75%167161	21	-0.53606	-1.2806	0.144904	0.582619	1	1547
487	CELLULAR RESPONSE TO FIBROBLAST GROWTH FACTOR STIMULUS%GOBP%GO:0044344	46	-0.404105	-1.27904	0.117326	0.587006	1	1395
488	PLASMA LIPOPROTEIN PARTICLE ASSEMBLY%GOBP%GO:0034377	18	-0.369259	-1.27791	0.142857	0.58979	1	1472
489	STEROL HOMEOSTASIS%GOBP%GO:0055092	37	-0.426891	-1.27647	0.136637	0.593764	1	1562
490	CELLULAR RESPONSE TO LIPID%GOBP%GO:0071396	120	-0.525979	-1.27594	0.0933014	0.594377	1	1449
491	ESC PLURIPOTENCY PATHWAYS%WIKIPATHWAYS_20210210%WP3931%HOMO SAPIENS	41	-0.503268	-1.27538	0.131171	0.595254	1	1393
492	REGULATION OF LEUKOCYTE CHEMOTAXIS%GOBP%GO:0002688	52	-0.368967	-1.2747	0.122783	0.596439	1	1069
493	REGULATION OF RESPONSE TO ENDOPLASMIC RETICULUM STRESS%GOBP%GO:1905897	41	-0.378176	-1.27387	0.134752	0.59815	1	973
494	RESPONSE TO FIBROBLAST GROWTH FACTOR%GOBP%GO:0071774	46	-0.407376	-1.27345	0.123796	0.598422	1	1395
495	CHOLESTEROL HOMEOSTASIS%GOBP%GO:0042632	37	-0.420323	-1.27303	0.13877	0.598712	1	1562
496	INORGANIC ION TRANSMEMBRANE TRANSPORT%GOBP%GO:0098660	113	-0.473157	-1.27116	0.0854701	0.604299	1	1726
497	TYPE 2 PAPILLARY RENAL CELL CARCINOMA%WIKIPATHWAYS_20210210%WP4241%HOMO SAPIENS	17	-0.470897	-1.2709	0.178797	0.603983	1	2430
498	CELLULAR RESPONSE TO CHEMOKINE%GOBP%GO:1990869	17	-0.475442	-1.27042	0.160126	0.604539	1	1427
499	BLOOD COAGULATION, INTRINSIC PATHWAY%GOBP%GO:0007597	16	-0.385943	-1.26795	0.166134	0.612248	1	1011
500	KERATAN SULFATE KERATIN METABOLISM%REACTOME%R-HSA-1638074.1	21	-0.425791	-1.26753	0.160294	0.612494	1	1997
501	CELLULAR RESPONSE TO ANTIBIOTIC%GOBP%GO:0071236	33	-0.391643	-1.26721	0.139332	0.612418	1	722
502	BIOCARTA_EDG1_PATHWAY%MSIGDB_C2%BIOCARTA_EDG1_PATHWAY	19	-0.376613	-1.266	0.176101	0.615607	1	877
503	AMMONIUM ION METABOLIC PROCESS%GOBP%GO:0097164	80	-0.33286	-1.26535	0.122265	0.616759	1	1676
504	ORGANIC ACID BIOSYNTHETIC PROCESS%GOBP%GO:0016053	154	-0.355035	-1.26518	0.0745192	0.616191	1	1850
505	REGULATION OF CHOLESTEROL BIOSYNTHESIS BY SREBP (SREBF)%REACTOME%R-HSA-1655829.2	27	-0.399868	-1.26403	0.167873	0.619068	1	1761
506	SULFUR COMPOUND METABOLIC PROCESS%GOBP%GO:0006790	193	-0.418399	-1.26376	0.0684932	0.61888	1	1760
507	CLASS B 2 (SECRETIN FAMILY RECEPTORS)%REACTOME DATABASE ID RELEASE 75%373080	17	-0.482353	-1.26328	0.160436	0.619414	1	1463
508	CALCIUM-MEDIATED SIGNALING%GOBP%GO:0019722	45	-0.34738	-1.26306	0.1402	0.619043	1	1578
509	LEUKOCYTE CELL-CELL ADHESION%GOBP%GO:0007159	32	-0.523129	-1.26165	0.137199	0.623026	1	1774
510	MITOCHONDRIAL TRANSLATION INITIATION%REACTOME%R-HSA-5368286.1	30	-0.371054	-1.26162	0.162202	0.621923	1	1223
511	REGULATION OF COLD-INDUCED THERMOGENESIS%GOBP%GO:0120161	55	-0.484515	-1.26129	0.117808	0.621881	1	1676
512	POSITIVE REGULATION OF PATHWAY-RESTRICTED SMAD PROTEIN PHOSPHORYLATION%GOBP%GO:0010862	19	-0.491245	-1.26121	0.199372	0.620965	1	710
513	TRANSCRIPTIONAL REGULATION BY VENTX%REACTOME DATABASE ID RELEASE 75%8853884	23	-0.383168	-1.26073	0.178354	0.621471	1	638
514	LIPID HOMEOSTASIS%GOBP%GO:0055088	50	-0.345119	-1.26001	0.146648	0.622825	1	1706
515	CARBOXYLIC ACID BIOSYNTHETIC PROCESS%GOBP%GO:0046394	154	-0.5214	-1.25989	0.0855803	0.622048	1	1850
516	EUKARYOTIC TRANSCRIPTION INITIATION%WIKIPATHWAYS_20210210%WP405%HOMO SAPIENS	23	-0.407272	-1.25925	0.178462	0.623281	1	1382
517	REGULATION OF SYNAPSE ASSEMBLY%GOBP%GO:0051963	25	-0.510985	-1.25848	0.165379	0.624852	1	1149
518	NONALCOHOLIC FATTY LIVER DISEASE%WIKIPATHWAYS_20210210%WP4396%HOMO SAPIENS	75	-0.488089	-1.25817	0.124183	0.624749	1	1802
519	TISSUE REMODELING%GOBP%GO:0048771	22	-0.413185	-1.25804	0.177005	0.624056	1	724
520	RESPONSE TO CHEMOKINE%GOBP%GO:1990868	17	-0.512992	-1.25776	0.194662	0.623854	1	1427
521	REGULATION OF ENDOTHELIAL CELL PROLIFERATION%GOBP%GO:0001936	61	-0.422004	-1.25758	0.140518	0.623337	1	784
522	HEART PROCESS%GOBP%GO:0003015	36	-0.435317	-1.2567	0.151917	0.625508	1	1023
523	SPHINGOLIPID CATABOLIC PROCESS%GOBP%GO:0030149	17	-0.341246	-1.25574	0.185535	0.627781	1	593
524	REGULATION OF REACTIVE OXYGEN SPECIES METABOLIC PROCESS%GOBP%GO:2000377	68	-0.29619	-1.25504	0.124837	0.629178	1	677
525	GLUTAMINE FAMILY AMINO ACID METABOLIC PROCESS%GOBP%GO:0009064	28	-0.510192	-1.25422	0.160584	0.631027	1	1887
526	PRE-NOTCH EXPRESSION AND PROCESSING%REACTOME%R-HSA-1912422.1	51	-0.42116	-1.2542	0.139118	0.629894	1	679
527	NEGATIVE REGULATION OF OSSIFICATION%GOBP%GO:0030279	19	-0.438246	-1.25392	0.15142	0.629711	1	1427
528	HEPARAN SULFATE HEPARIN (HS-GAG) METABOLISM%REACTOME%R-HSA-1638091.1	38	-0.469922	-1.25318	0.16289	0.631127	1	920
529	ACTIVATION OF MATRIX METALLOPROTEINASES%REACTOME DATABASE ID RELEASE 75%1592389	20	-0.410151	-1.25272	0.162826	0.631514	1	957
530	PLATELET AGGREGATION%GOBP%GO:0070527	31	-0.414422	-1.25237	0.156483	0.631586	1	1011
531	CELLULAR RESPONSE TO GROWTH FACTOR STIMULUS%GOBP%GO:0071363	182	-0.469025	-1.2512	0.071991	0.63461	1	1454
532	POSITIVE REGULATION OF LEUKOCYTE MEDIATED CYTOTOXICITY%GOBP%GO:0001912	20	-0.404175	-1.25028	0.179445	0.636809	1	2331
533	POSITIVE REGULATION OF LYMPHOCYTE DIFFERENTIATION%GOBP%GO:0045621	26	-0.366187	-1.24876	0.156923	0.641346	1	1000
534	HEMATOPOIETIC STEM CELL DIFFERENTIATION%WIKIPATHWAYS_20210210%WP2849%HOMO SAPIENS	17	-0.48099	-1.24751	0.194357	0.644668	1	1185
535	MITOCHONDRIAL TRANSLATION TERMINATION%REACTOME%R-HSA-5419276.1	31	-0.501919	-1.24718	0.171512	0.644641	1	1223
536	CATION TRANSMEMBRANE TRANSPORT%GOBP%GO:0098655	120	-0.476929	-1.24489	0.108886	0.65187	1	1052
537	BIOCARTA_NFAT_PATHWAY%MSIGDB_C2%BIOCARTA_NFAT_PATHWAY	32	-0.478599	-1.24465	0.162162	0.65159	1	700
538	HEDGEHOG SIGNALING PATHWAY%WIKIPATHWAYS_20210210%WP4249%HOMO SAPIENS	20	-0.455683	-1.24356	0.202144	0.654419	1	1146
539	RESPONSE TO OXIDATIVE STRESS%GOBP%GO:0006979	147	-0.465232	-1.24342	0.0902778	0.653676	1	1809
540	RENIN ANGIOTENSIN ALDOSTERONE SYSTEM (RAAS)%WIKIPATHWAYS_20210210%WP4756%HOMO SAPIENS	16	-0.43988	-1.24326	0.208655	0.653119	1	716
541	REGULATION OF T CELL MEDIATED CYTOTOXICITY%GOBP%GO:0001914	15	-0.408457	-1.24307	0.201563	0.652602	1	1016
542	REGULATION OF RESPONSE TO WOUNDING%GOBP%GO:1903034	101	-0.404105	-1.24169	0.114713	0.656673	1	1090
543	REGULATION OF OSSIFICATION%GOBP%GO:0030278	59	-0.390602	-1.24151	0.141484	0.656103	1	1449
544	GENE SILENCING BY RNA%GOBP%GO:0031047	33	-0.31344	-1.24093	0.170732	0.657128	1	608
545	CELLULAR RESPONSE TO LIPOPOLYSACCHARIDE%GOBP%GO:0071222	53	-0.340472	-1.23938	0.153949	0.661797	1	999
546	FATTY ACID BIOSYNTHESIS%WIKIPATHWAYS_20210210%WP357%HOMO SAPIENS	18	-0.470224	-1.23772	0.185714	0.666925	1	1473
547	ICOSANOID METABOLIC PROCESS%GOBP%GO:0006690	48	-0.48212	-1.23559	0.149441	0.673778	1	1092
548	MITOCHONDRIAL TRANSLATIONAL TERMINATION%GOBP%GO:0070126	31	-0.500103	-1.23467	0.176024	0.676107	1	1223
549	LIVER DEVELOPMENT%GOBP%GO:0001889	15	-0.418274	-1.23249	0.223491	0.683167	1	1000
550	ACTIVATION OF GENE EXPRESSION BY SREBF (SREBP)%REACTOME DATABASE ID RELEASE 75%2426168	18	-0.469013	-1.23223	0.191554	0.682934	1	1440
551	SIGNALING EVENTS MEDIATED BY VEGFR1 AND VEGFR2%PATHWAY INTERACTION DATABASE NCI-NATURE CURATED DATA%SIGNALING EVENTS MEDIATED BY VEGFR1 AND VEGFR2	53	-0.484515	-1.23208	0.163435	0.682355	1	453
552	LUNG FIBROSIS%WIKIPATHWAYS_20210210%WP3624%HOMO SAPIENS	29	-0.35216	-1.23189	0.189504	0.681801	1	1669
553	RETINOID METABOLIC PROCESS%GOBP%GO:0001523	44	-0.324826	-1.23125	0.172943	0.682982	1	989
554	INNER EAR DEVELOPMENT%GOBP%GO:0048839	18	-0.457086	-1.23059	0.192675	0.684367	1	260
555	NUCLEOSIDE PHOSPHATE BIOSYNTHETIC PROCESS%GOBP%GO:1901293	142	-0.431814	-1.23011	0.1	0.685012	1	1864
556	STATIN PATHWAY%WIKIPATHWAYS_20210210%WP430%HOMO SAPIENS	20	-0.377987	-1.22963	0.213826	0.685761	1	989
557	HEXOSE CATABOLIC PROCESS%GOBP%GO:0019320	34	-0.414807	-1.22887	0.172876	0.687454	1	1850
558	POSITIVE REGULATION OF LEUKOCYTE MEDIATED IMMUNITY%GOBP%GO:0002705	46	-0.49632	-1.22728	0.180217	0.692479	1	754
559	NEURON PROJECTION EXTENSION%GOBP%GO:1990138	20	-0.357604	-1.22624	0.196172	0.695342	1	501
560	PLASMA MEMBRANE INVAGINATION%GOBP%GO:0099024	24	-0.346688	-1.22612	0.197068	0.694599	1	974
561	CYTOSOLIC CALCIUM ION TRANSPORT%GOBP%GO:0060401	22	-0.484515	-1.22608	0.201821	0.693535	1	1691
562	ADHERENS JUNCTION ORGANIZATION%GOBP%GO:0034332	48	-0.490795	-1.2253	0.17341	0.69536	1	760
563	DEVELOPMENTAL GROWTH%GOBP%GO:0048589	56	-0.481351	-1.225	0.173913	0.695233	1	720
564	REGULATION OF CARDIAC MUSCLE CELL CONTRACTION%GOBP%GO:0086004	16	-0.412066	-1.22463	0.207792	0.695417	1	675
565	REGULATION OF EPITHELIAL CELL PROLIFERATION%GOBP%GO:0050678	110	-0.343132	-1.22446	0.127295	0.694873	1	1023
566	KERATAN SULFATE METABOLIC PROCESS%GOBP%GO:0042339	21	-0.482128	-1.22419	0.209953	0.694669	1	1551
567	REGULATION OF T CELL DIFFERENTIATION%GOBP%GO:0045580	25	-0.465222	-1.22407	0.192593	0.693939	1	1000
568	ANTIBIOTIC CATABOLIC PROCESS%GOBP%GO:0017001	31	-0.309002	-1.2239	0.19062	0.693358	1	1673
569	DEVELOPMENTAL GROWTH INVOLVED IN MORPHOGENESIS%GOBP%GO:0060560	25	-0.482128	-1.22368	0.20458	0.692954	1	501
570	RESPONSE TO GROWTH FACTOR%GOBP%GO:0070848	190	-0.315888	-1.22331	0.108744	0.693171	1	1454
571	REGULATION OF PLASMA LIPOPROTEIN PARTICLE LEVELS%GOBP%GO:0097006	52	-0.359291	-1.22312	0.155862	0.692706	1	1769
572	MITOCHONDRIAL TRANSLATION%GOBP%GO:0032543	42	-0.392663	-1.22253	0.197514	0.693809	1	1269
573	COENZYME METABOLIC PROCESS%GOBP%GO:0006732	176	-0.400681	-1.2219	0.107263	0.695098	1	1850
574	POSITIVE REGULATION OF SMALL MOLECULE METABOLIC PROCESS%GOBP%GO:0062013	44	-0.400124	-1.22046	0.167582	0.699461	1	1589
575	POSITIVE REGULATION OF OSTEOBLAST DIFFERENTIATION%GOBP%GO:0045669	22	-0.493409	-1.22033	0.178019	0.698749	1	1449
576	DITERPENOID METABOLIC PROCESS%GOBP%GO:0016101	45	-0.451686	-1.22001	0.18724	0.698824	1	989
577	SMAD PROTEIN SIGNAL TRANSDUCTION%GOBP%GO:0060395	16	-0.485762	-1.21961	0.204687	0.699126	1	710
578	EMBRYONIC ORGAN MORPHOGENESIS%GOBP%GO:0048562	42	-0.452203	-1.21934	0.173315	0.698983	1	938
579	POSITIVE REGULATION OF JAK-STAT CASCADE%GOBP%GO:0046427	18	-0.377675	-1.21919	0.214521	0.698356	1	1619
580	REGULATION OF BMP SIGNALING PATHWAY%GOBP%GO:0030510	29	-0.336051	-1.21873	0.187311	0.698977	1	628
581	SRP-DEPENDENT COTRANSLATIONAL PROTEIN TARGETING TO MEMBRANE%REACTOME DATABASE ID RELEASE 75%1799339	105	-0.435469	-1.21804	0.1275	0.700459	1	584
582	REGULATION OF MONONUCLEAR CELL MIGRATION%GOBP%GO:0071675	24	-0.424843	-1.21804	0.206015	0.699261	1	1069
583	NEGATIVE REGULATION OF LEUKOCYTE DIFFERENTIATION%GOBP%GO:1902106	20	-0.471011	-1.21802	0.208075	0.698109	1	782
584	LONG-CHAIN FATTY ACID METABOLIC PROCESS%GOBP%GO:0001676	47	-0.43267	-1.21777	0.174402	0.697899	1	1676
585	PROTEIN FOLDING%GOBP%GO:0006457	146	-0.41715	-1.21772	0.128266	0.696898	1	1535
586	REGULATION OF PLATELET ACTIVATION%GOBP%GO:0010543	24	-0.438756	-1.21751	0.198485	0.696506	1	1369
587	POSITIVE REGULATION OF RESPONSE TO CYTOKINE STIMULUS%GOBP%GO:0060760	16	-0.483673	-1.21632	0.2187	0.699891	1	1647
588	RHO GTPASES ACTIVATE CIT%REACTOME%R-HSA-5625900.2	16	-0.384568	-1.21594	0.213826	0.700223	1	1694
589	REGULATION OF LYMPHOCYTE MEDIATED IMMUNITY%GOBP%GO:0002706	45	-0.430147	-1.21528	0.172691	0.701639	1	1016
590	REGULATION OF TRANSFORMING GROWTH FACTOR BETA PRODUCTION%GOBP%GO:0071634	17	-0.406787	-1.21437	0.218266	0.703817	1	563
591	POSITIVE REGULATION OF ANGIOGENESIS%GOBP%GO:0045766	63	-0.346688	-1.21414	0.180328	0.703454	1	1082
592	REGULATION OF OSTEOBLAST DIFFERENTIATION%GOBP%GO:0045667	33	-0.471872	-1.214	0.206897	0.702772	1	1449
593	INFLAMMATORY RESPONSE%GOBP%GO:0006954	104	-0.436915	-1.21354	0.135678	0.703284	1	1802
594	REGULATION OF INFLAMMATORY RESPONSE%GOBP%GO:0050727	180	-0.411545	-1.21254	0.117579	0.706055	1	1016
595	REGULATION OF MYELOID LEUKOCYTE DIFFERENTIATION%GOBP%GO:0002761	28	-0.498473	-1.21217	0.207048	0.706264	1	1494
596	PEPTIDYL-TYROSINE MODIFICATION%GOBP%GO:0018212	41	-0.496352	-1.2121	0.196653	0.705353	1	1431
597	HEPATICOBILIARY SYSTEM DEVELOPMENT%GOBP%GO:0061008	16	-0.318369	-1.21182	0.207576	0.705257	1	1000
598	ELASTIC FIBRE FORMATION%REACTOME DATABASE ID RELEASE 75%1566948	31	-0.431415	-1.21175	0.195936	0.704378	1	1813
599	SYNDECAN INTERACTIONS%REACTOME DATABASE ID RELEASE 75%3000170	19	-0.364694	-1.21084	0.225755	0.706773	1	723
600	COLLAGEN BIOSYNTHESIS AND MODIFYING ENZYMES%REACTOME DATABASE ID RELEASE 75%1650814	47	-0.385471	-1.21008	0.181818	0.708509	1	1629
601	PID_PI3KCI_PATHWAY%MSIGDB_C2%PID_PI3KCI_PATHWAY	32	-0.459099	-1.21007	0.196108	0.707398	1	978
602	GLYCOLYSIS%PANTHER PATHWAY%P00024	16	-0.318294	-1.20928	0.217116	0.709273	1	1771
603	SYSTEM PROCESS%GOBP%GO:0003008	346	-0.394621	-1.20912	0.0657476	0.708705	1	1023
604	GLAND DEVELOPMENT%GOBP%GO:0048732	45	-0.333169	-1.20848	0.194823	0.710025	1	1393
605	CELLULAR RESPONSE TO IONIZING RADIATION%GOBP%GO:0071479	23	-0.450478	-1.20792	0.209023	0.711069	1	661
606	HISTONE MODIFICATION%GOBP%GO:0016570	94	-0.36058	-1.2072	0.171004	0.712569	1	679
607	REGULATION OF LIPID BIOSYNTHETIC PROCESS%GOBP%GO:0046890	44	-0.376044	-1.20706	0.189341	0.711959	1	1504
608	REGULATION OF PROTEIN KINASE B SIGNALING%GOBP%GO:0051896	84	-0.329279	-1.20617	0.162127	0.714299	1	947
609	HYDROGEN PEROXIDE METABOLIC PROCESS%GOBP%GO:0042743	23	-0.310328	-1.20562	0.217523	0.71524	1	1675
610	SARS-COV-1 INFECTION%REACTOME%R-HSA-9678108.2	35	-0.311631	-1.20356	0.21657	0.722275	1	768
611	BASIGIN INTERACTIONS%REACTOME%R-HSA-210991.1	19	-0.484521	-1.20307	0.22239	0.722935	1	361
612	ADAPTIVE IMMUNE RESPONSE%GOBP%GO:0002250	60	-0.360511	-1.20188	0.177198	0.726272	1	978
613	AURORA A SIGNALING%PATHWAY INTERACTION DATABASE NCI-NATURE CURATED DATA%AURORA A SIGNALING	16	-0.351654	-1.2017	0.227769	0.725813	1	1287
614	PROTEIN-LIPID COMPLEX ASSEMBLY%GOBP%GO:0065005	20	-0.502539	-1.20104	0.235115	0.727294	1	1484
615	NUCLEOTIDE BIOSYNTHETIC PROCESS%GOBP%GO:0009165	136	-0.322206	-1.20078	0.13422	0.727037	1	1850
616	ESTABLISHMENT OF PROTEIN LOCALIZATION TO ENDOPLASMIC RETICULUM%GOBP%GO:0072599	104	-0.346688	-1.20025	0.151592	0.72791	1	166
617	POSITIVE REGULATION OF NIK/NF-KAPPAB SIGNALING%GOBP%GO:1901224	29	-0.316758	-1.19945	0.226879	0.729837	1	556
618	MULTICELLULAR ORGANISMAL SIGNALING%GOBP%GO:0035637	31	-0.337047	-1.19934	0.200282	0.729105	1	988
619	EXTRACELLULAR STRUCTURE ORGANIZATION%GOBP%GO:0043062	245	-0.364694	-1.19883	0.105556	0.72991	1	989
620	ENDOMETRIAL CANCER%WIKIPATHWAYS_20210210%WP4155%HOMO SAPIENS	32	-0.441674	-1.19835	0.217391	0.730478	1	784
621	CELLULAR RESPONSE TO ALCOHOL%GOBP%GO:0097306	24	-0.410096	-1.19766	0.230294	0.732048	1	1464
622	HETEROTRIMERIC G-PROTEIN SIGNALING PATHWAY-GI ALPHA AND GS ALPHA MEDIATED PATHWAY%PANTHER PATHWAY%P00026	44	-0.467512	-1.19653	0.192024	0.73534	1	1464
623	REGULATION OF MACROPHAGE MIGRATION%GOBP%GO:1905521	17	-0.399554	-1.19315	0.229261	0.747891	1	787
624	REGULATION OF STAT CASCADE%GOBP%GO:1904892	30	-0.36652	-1.19307	0.219911	0.746997	1	1427
625	REGULATION OF BONE MINERALIZATION%GOBP%GO:0030500	30	-0.466459	-1.19285	0.208207	0.746677	1	1449
626	HEMATOPOIETIC PROGENITOR CELL DIFFERENTIATION%GOBP%GO:0002244	16	-0.364694	-1.19242	0.230645	0.747125	1	1016
627	MYELOID CELL HOMEOSTASIS%GOBP%GO:0002262	30	-0.453632	-1.19223	0.234949	0.746686	1	945
628	CELLULAR RESPONSE TO MOLECULE OF BACTERIAL ORIGIN%GOBP%GO:0071219	57	-0.38974	-1.19167	0.184319	0.747682	1	999
629	ADENYLATE CYCLASE-MODULATING G PROTEIN-COUPLED RECEPTOR SIGNALING PATHWAY%GOBP%GO:0007188	48	-0.379844	-1.1916	0.194595	0.746816	1	1503
630	REGULATION OF PHOSPHOLIPASE C ACTIVITY%GOBP%GO:1900274	16	-0.457828	-1.19117	0.244373	0.747357	1	965
631	SYNAPSE ASSEMBLY%GOBP%GO:0007416	31	-0.349793	-1.19078	0.191291	0.747729	1	1317
632	DISRUPTION OF POSTSYNAPTIC SIGNALLING BY CNV%WIKIPATHWAYS_20210210%WP4875%HOMO SAPIENS	16	-0.35234	-1.19018	0.255118	0.748896	1	675
633	HEDGEHOG%NETPATH%HEDGEHOG	18	-0.475176	-1.18881	0.242089	0.753194	1	1454
634	POSITIVE REGULATION OF CELL-CELL ADHESION%GOBP%GO:0022409	108	-0.448664	-1.18874	0.158672	0.752263	1	1016
635	POSITIVE REGULATION OF GLIOGENESIS%GOBP%GO:0014015	15	-0.461483	-1.18865	0.232633	0.751451	1	787
636	HALLMARK_KRAS_SIGNALING_DN%MSIGDB_C2%HALLMARK_KRAS_SIGNALING_DN	56	-0.345474	-1.18838	0.186207	0.751331	1	1557
637	BIOCARTA_RHO_PATHWAY%MSIGDB_C2%BIOCARTA_RHO_PATHWAY	15	-0.318759	-1.18757	0.264182	0.753321	1	1456
638	ASSEMBLY OF COLLAGEN FIBRILS AND OTHER MULTIMERIC STRUCTURES%REACTOME DATABASE ID RELEASE 75%2022090	48	-0.390685	-1.18749	0.197691	0.752462	1	684
639	REGULATION OF CARDIAC MUSCLE CONTRACTION%GOBP%GO:0055117	28	-0.457136	-1.18736	0.240713	0.751792	1	988
640	EPHA FORWARD SIGNALING%PATHWAY INTERACTION DATABASE NCI-NATURE CURATED DATA%EPHA FORWARD SIGNALING	25	-0.395118	-1.18644	0.24247	0.754214	1	955
641	MICRORNA (MIRNA) BIOGENESIS%REACTOME DATABASE ID RELEASE 75%203927	15	-0.446248	-1.18577	0.241214	0.755687	1	1364
642	EXTRACELLULAR MATRIX ORGANIZATION%GOBP%GO:0030198	217	-0.489126	-1.18525	0.124575	0.756496	1	699
643	POSITIVE REGULATION OF EPITHELIAL CELL DIFFERENTIATION%GOBP%GO:0030858	15	-0.376057	-1.18516	0.252443	0.755661	1	666
644	DIGESTIVE TRACT DEVELOPMENT%GOBP%GO:0048565	19	-0.405497	-1.18511	0.242009	0.754688	1	1714
645	ION TRANSPORT%GOBP%GO:0006811	340	-0.435797	-1.18494	0.096603	0.754206	1	1111
646	CLASS I PI3K SIGNALING EVENTS%PATHWAY INTERACTION DATABASE NCI-NATURE CURATED DATA%CLASS I PI3K SIGNALING EVENTS	33	-0.452744	-1.18403	0.230428	0.75662	1	978
647	POLYOL BIOSYNTHETIC PROCESS%GOBP%GO:0046173	21	-0.314717	-1.18394	0.23628	0.755794	1	1000
648	HOMEOSTASIS OF NUMBER OF CELLS%GOBP%GO:0048872	44	-0.361198	-1.18377	0.235461	0.755268	1	730
649	LEUKOCYTE DIFFERENTIATION%GOBP%GO:0002521	75	-0.458561	-1.18275	0.195026	0.758277	1	1679
650	REGULATION OF KIDNEY DEVELOPMENT%GOBP%GO:0090183	16	-0.331568	-1.18271	0.250401	0.757249	1	1494
651	CARBOHYDRATE METABOLIC PROCESS%GOBP%GO:0005975	165	-0.312141	-1.18053	0.156571	0.764646	1	1946
652	REGULATION OF MONOCYTE CHEMOTAXIS%GOBP%GO:0090025	15	-0.347782	-1.18049	0.221362	0.763637	1	1069
653	GAMMA CARBOXYLATION, HYPUSINE FORMATION AND ARYLSULFATASE ACTIVATION%REACTOME%R-HSA-163841.4	26	-0.41842	-1.17953	0.245588	0.766355	1	1559
654	LIPID TRANSPORT%GOBP%GO:0006869	93	-0.318628	-1.17899	0.169666	0.767356	1	989
655	REGULATION OF CELL ACTIVATION%GOBP%GO:0050865	190	-0.324806	-1.17886	0.151826	0.766754	1	1016
656	COVALENT CHROMATIN MODIFICATION%GOBP%GO:0016569	96	-0.418979	-1.17832	0.185	0.767705	1	679
657	PPAR SIGNALING PATHWAY%WIKIPATHWAYS_20210210%WP3942%HOMO SAPIENS	40	-0.434525	-1.1782	0.206395	0.767027	1	1688
658	MACROMOLECULE METHYLATION%GOBP%GO:0043414	69	-0.435263	-1.17767	0.194226	0.768066	1	714
659	BIOCARTA_PAR1_PATHWAY%MSIGDB_C2%BIOCARTA_PAR1_PATHWAY	16	-0.48226	-1.17756	0.259027	0.767391	1	1427
660	HEDGEHOG%IOB%HEDGEHOG	18	-0.444353	-1.17714	0.253456	0.767907	1	1454
661	ORGANELLE BIOGENESIS AND MAINTENANCE%REACTOME%R-HSA-1852241.5	115	-0.383535	-1.177	0.166061	0.767326	1	1117
662	NEGATIVE REGULATION OF EPITHELIAL CELL MIGRATION%GOBP%GO:0010633	34	-0.440221	-1.17627	0.239163	0.769191	1	666
663	METHYLATION%GOBP%GO:0032259	80	-0.376382	-1.17585	0.201058	0.769712	1	714
664	PID_AURORA_A_PATHWAY%MSIGDB_C2%PID_AURORA_A_PATHWAY	16	-0.335004	-1.17514	0.259905	0.771388	1	1287
665	RAS AND BRADYKININ PATHWAYS IN COVID-19%WIKIPATHWAYS_20210210%WP4969%HOMO SAPIENS	17	-0.290362	-1.17505	0.261147	0.770584	1	168
666	POSITIVE REGULATION OF IMMUNOGLOBULIN PRODUCTION%GOBP%GO:0002639	16	-0.375469	-1.17499	0.254777	0.769683	1	1016
667	MITOCHONDRIAL GENE EXPRESSION%GOBP%GO:0140053	52	-0.309408	-1.17433	0.220028	0.771285	1	1269
668	CALCIUM ION TRANSPORT%GOBP%GO:0006816	51	-0.345207	-1.17431	0.210744	0.770206	1	1778
669	MITOCHONDRIAL TRANSLATIONAL ELONGATION%GOBP%GO:0070125	33	-0.392134	-1.17422	0.219549	0.76941	1	1223
670	TP53 REGULATES TRANSCRIPTION OF DNA REPAIR GENES%REACTOME%R-HSA-6796648.3	38	-0.452964	-1.17377	0.228245	0.770065	1	696
671	MUSCLE ORGAN DEVELOPMENT%GOBP%GO:0007517	57	-0.322565	-1.17372	0.218837	0.769086	1	881
672	POSITIVE REGULATION OF TELOMERE MAINTENANCE VIA TELOMERASE%GOBP%GO:0032212	18	-0.371075	-1.17331	0.256329	0.769575	1	1099
673	BIOLOGICAL ADHESION%GOBP%GO:0022610	384	-0.309895	-1.17304	0.103158	0.769509	1	1532
674	VALIDATED TARGETS OF C-MYC TRANSCRIPTIONAL REPRESSION%PATHWAY INTERACTION DATABASE NCI-NATURE CURATED DATA%VALIDATED TARGETS OF C-MYC TRANSCRIPTIONAL REPRESSION	31	-0.360552	-1.17302	0.225904	0.768454	1	938
675	PID_EPHA_FWDPATHWAY%MSIGDB_C2%PID_EPHA_FWDPATHWAY	25	-0.339797	-1.17205	0.242748	0.771231	1	955
676	POSITIVE REGULATION OF CHEMOTAXIS%GOBP%GO:0050921	62	-0.443439	-1.17191	0.217742	0.770697	1	938
677	GLYCEROPHOSPHOLIPID BIOSYNTHESIS%REACTOME DATABASE ID RELEASE 75%1483206	48	-0.451779	-1.17185	0.220408	0.769779	1	1895
678	CHAPERONE MEDIATED AUTOPHAGY%REACTOME DATABASE ID RELEASE 75%9613829	16	-0.410857	-1.17139	0.262739	0.770512	1	173
679	ADORA2B MEDIATED ANTI-INFLAMMATORY CYTOKINES PRODUCTION%REACTOME%R-HSA-9660821.1	29	-0.421734	-1.17129	0.249288	0.769768	1	1464
680	REGULATION OF LEUKOCYTE ACTIVATION%GOBP%GO:0002694	168	-0.400825	-1.17033	0.168213	0.772424	1	1016
681	FATTY ACYL-COA BIOSYNTHESIS%REACTOME%R-HSA-75105.6	15	-0.348177	-1.17025	0.249169	0.771579	1	1828
682	PHOSPHOLIPID TRANSPORT%GOBP%GO:0015914	31	-0.375619	-1.16942	0.240713	0.773764	1	458
683	HISTONE ACETYLATION%GOBP%GO:0016573	18	-0.390652	-1.16888	0.259375	0.774814	1	679
684	RESPONSE TO ANTIBIOTIC%GOBP%GO:0046677	54	-0.305245	-1.16875	0.208777	0.774181	1	1464
685	REGULATION OF SYSTEMIC ARTERIAL BLOOD PRESSURE MEDIATED BY A CHEMICAL SIGNAL%GOBP%GO:0003044	17	-0.364694	-1.16872	0.250401	0.773188	1	119
686	COLLAGEN FORMATION%REACTOME%R-HSA-1474290.3	67	-0.344578	-1.16792	0.190476	0.775183	1	1120
687	FATTY ACID BIOSYNTHETIC PROCESS%GOBP%GO:0006633	39	-0.318759	-1.16779	0.247887	0.774586	1	1354
688	CELL ADHESION%GOBP%GO:0007155	377	-0.453963	-1.16769	0.117155	0.773863	1	1458
689	HALLMARK_PEROXISOME%MSIGDB_C2%HALLMARK_PEROXISOME	64	-0.437043	-1.16657	0.202649	0.777163	1	1848
690	POSITIVE REGULATION OF PHOSPHOLIPASE C ACTIVITY%GOBP%GO:0010863	16	-0.349026	-1.16606	0.267584	0.778044	1	965
691	NEGATIVE REGULATION OF ANGIOGENESIS%GOBP%GO:0016525	51	-0.38402	-1.16529	0.217631	0.780023	1	999
692	FATTY ACID DERIVATIVE BIOSYNTHETIC PROCESS%GOBP%GO:1901570	43	-0.317137	-1.16516	0.237956	0.779405	1	1828
693	REGULATION OF VASCULATURE DEVELOPMENT%GOBP%GO:1901342	144	-0.373249	-1.16496	0.185446	0.779116	1	1010
694	RESPONSE TO IONIZING RADIATION%GOBP%GO:0010212	39	-0.38402	-1.16404	0.240876	0.781657	1	720
695	NEGATIVE REGULATION OF LIPID BIOSYNTHETIC PROCESS%GOBP%GO:0051055	15	-0.389674	-1.16327	0.282927	0.783536	1	1504
696	PHAGOCYTOSIS%GOBP%GO:0006909	116	-0.474572	-1.16324	0.19339	0.782576	1	974
697	DIGESTION%GOBP%GO:0007586	31	-0.294492	-1.16286	0.263785	0.78301	1	1562
698	POSTTRANSCRIPTIONAL GENE SILENCING BY RNA%GOBP%GO:0035194	30	-0.369814	-1.16282	0.265396	0.782025	1	608
699	REVERSE CHOLESTEROL TRANSPORT%GOBP%GO:0043691	15	-0.378897	-1.16257	0.267742	0.781966	1	1472
700	MITOCHONDRIAL TRANSLATION%REACTOME DATABASE ID RELEASE 75%5368287	34	-0.340774	-1.1623	0.240113	0.781892	1	1223
701	MONOCARBOXYLIC ACID TRANSPORT%GOBP%GO:0015718	43	-0.439989	-1.16226	0.232267	0.780932	1	913
702	REGULATION OF LIPID LOCALIZATION%GOBP%GO:1905952	64	-0.479444	-1.16223	0.209486	0.77995	1	1090
703	NEGATIVE REGULATION OF RESPONSE TO BIOTIC STIMULUS%GOBP%GO:0002832	15	-0.339803	-1.16222	0.279935	0.778864	1	910
704	NEGATIVE REGULATION OF CYTOKINE PRODUCTION%GOBP%GO:0001818	88	-0.365435	-1.16208	0.215305	0.778307	1	1712
705	REGULATION OF SYSTEM PROCESS%GOBP%GO:0044057	142	-0.362368	-1.16195	0.188235	0.777767	1	907
706	NEGATIVE REGULATION OF BLOOD VESSEL MORPHOGENESIS%GOBP%GO:2000181	52	-0.311032	-1.16168	0.236092	0.777751	1	999
707	REGULATION OF FAT CELL DIFFERENTIATION%GOBP%GO:0045598	26	-0.375929	-1.16134	0.259427	0.778007	1	1656
708	MITOCHONDRIAL TRANSLATION ELONGATION%REACTOME%R-HSA-5389840.1	33	-0.475021	-1.16109	0.254731	0.777896	1	1223
709	T CELL ACTIVATION%GOBP%GO:0042110	50	-0.412136	-1.16083	0.242991	0.777765	1	1016
710	PROSTANOID METABOLIC PROCESS%GOBP%GO:0006692	27	-0.338314	-1.15959	0.246715	0.781441	1	1080
711	SPHINGOLIPID BIOSYNTHETIC PROCESS%GOBP%GO:0030148	28	-0.40929	-1.15872	0.23741	0.783879	1	1508
712	PEPTIDYL-TYROSINE PHOSPHORYLATION%GOBP%GO:0018108	39	-0.329537	-1.15851	0.246398	0.783598	1	1431
713	PID_MYC_REPRESS_PATHWAY%MSIGDB_C2%PID_MYC_REPRESS_PATHWAY	31	-0.448867	-1.1584	0.230194	0.782929	1	938
714	PID_VEGFR1_2_PATHWAY%MSIGDB_C2%PID_VEGFR1_2_PATHWAY	56	-0.447567	-1.15752	0.234014	0.785344	1	453
715	TRYPTOPHAN METABOLISM%WIKIPATHWAYS_20210210%WP465%HOMO SAPIENS	20	-0.317928	-1.1572	0.273016	0.785473	1	1515
716	POSITIVE REGULATION OF DEPHOSPHORYLATION%GOBP%GO:0035306	24	-0.446902	-1.1559	0.266154	0.789586	1	694
717	REGULATION OF CYCLIN-DEPENDENT PROTEIN SERINE/THREONINE KINASE ACTIVITY%GOBP%GO:0000079	24	-0.326428	-1.15538	0.262579	0.790569	1	696
718	VIRAL GENE EXPRESSION%GOBP%GO:0019080	148	-0.309408	-1.15484	0.199764	0.791615	1	166
719	NUCLEOSIDE DIPHOSPHATE METABOLIC PROCESS%GOBP%GO:0009132	38	-0.412633	-1.15399	0.247207	0.793935	1	1850
720	CELL-CELL ADHESION%GOBP%GO:0098609	216	-0.448514	-1.15288	0.178174	0.797304	1	1071
721	HUMAN COMPLEMENT SYSTEM%WIKIPATHWAYS_20210210%WP2806%HOMO SAPIENS	80	-0.43394	-1.15277	0.228535	0.796725	1	910
722	PIGMENT BIOSYNTHETIC PROCESS%GOBP%GO:0046148	21	-0.427731	-1.15255	0.275188	0.796477	1	1924
723	PROSTAGLANDIN METABOLIC PROCESS%GOBP%GO:0006693	27	-0.396889	-1.15195	0.274627	0.797817	1	1080
724	INTERNAL PEPTIDYL-LYSINE ACETYLATION%GOBP%GO:0018393	19	-0.438434	-1.15127	0.288786	0.799466	1	679
725	POSITIVE REGULATION OF MYELOID LEUKOCYTE DIFFERENTIATION%GOBP%GO:0002763	15	-0.310054	-1.15095	0.295191	0.799589	1	999
726	PROTEIN METHYLATION%GOBP%GO:0006479	39	-0.384093	-1.14999	0.273759	0.802413	1	679
727	REGULATION OF ANGIOGENESIS%GOBP%GO:0045765	129	-0.36009	-1.14921	0.210526	0.804387	1	1010
728	COFACTOR BIOSYNTHETIC PROCESS%GOBP%GO:0051188	115	-0.430881	-1.14909	0.227662	0.803779	1	1850
729	RETINA DEVELOPMENT IN CAMERA-TYPE EYE%GOBP%GO:0060041	19	-0.431825	-1.14892	0.274062	0.803364	1	1061
730	REGULATION OF IMMUNE EFFECTOR PROCESS%GOBP%GO:0002697	159	-0.43998	-1.14874	0.191193	0.803019	1	1016
731	NEGATIVE REGULATION OF ION TRANSMEMBRANE TRANSPORT%GOBP%GO:0034766	39	-0.446432	-1.14846	0.25254	0.803047	1	988
732	REGULATION OF ACTIN DYNAMICS FOR PHAGOCYTIC CUP FORMATION%REACTOME DATABASE ID RELEASE 75%2029482	47	-0.279896	-1.14831	0.236413	0.802572	1	974
733	FORMATION OF TUBULIN FOLDING INTERMEDIATES BY CCT TRIC%REACTOME%R-HSA-389960.2	22	-0.37491	-1.14728	0.265116	0.805661	1	826
734	VESICLE TRANSPORT ALONG MICROTUBULE%GOBP%GO:0047496	23	-0.323687	-1.14707	0.282318	0.805427	1	1056
735	EAR DEVELOPMENT%GOBP%GO:0043583	21	-0.39214	-1.14702	0.292259	0.804554	1	260
736	SIGNALING MEDIATED BY P38-ALPHA AND P38-BETA%PATHWAY INTERACTION DATABASE NCI-NATURE CURATED DATA%SIGNALING MEDIATED BY P38-ALPHA AND P38-BETA	15	-0.364966	-1.14632	0.29202	0.806258	1	716
737	REGULATION OF MYELOID CELL DIFFERENTIATION%GOBP%GO:0045637	79	-0.410821	-1.14571	0.23329	0.807579	1	1011
738	HISTONE MODIFICATIONS%WIKIPATHWAYS_20210210%WP2369%HOMO SAPIENS	18	-0.421535	-1.1454	0.27044	0.80775	1	1324
739	POSITIVE REGULATION OF T CELL DIFFERENTIATION%GOBP%GO:0045582	19	-0.380571	-1.145	0.287926	0.808293	1	1000
740	PROTEIN ALKYLATION%GOBP%GO:0008213	39	-0.285041	-1.14495	0.251095	0.807394	1	679
741	NEGATIVE REGULATION OF MULTICELLULAR ORGANISMAL PROCESS%GOBP%GO:0051241	377	-0.391482	-1.14426	0.142111	0.809059	1	1670
742	ORGANELLE TRANSPORT ALONG MICROTUBULE%GOBP%GO:0072384	39	-0.30779	-1.14368	0.264286	0.810349	1	1087
743	ACTIN FILAMENT BUNDLE ASSEMBLY%GOBP%GO:0051017	31	-0.306278	-1.14276	0.269461	0.812873	1	497
744	INTERACTION BETWEEN L1 AND ANKYRINS%REACTOME DATABASE ID RELEASE 75%445095	15	-0.43975	-1.14238	0.279146	0.81333	1	940
745	SENSORY PERCEPTION%GOBP%GO:0007600	73	-0.365437	-1.14174	0.236911	0.814857	1	1003
746	REGULATION OF BIOMINERAL TISSUE DEVELOPMENT%GOBP%GO:0070167	35	-0.453963	-1.1407	0.276504	0.81809	1	1449
747	CELLULAR COMPONENT ASSEMBLY INVOLVED IN MORPHOGENESIS%GOBP%GO:0010927	26	-0.449432	-1.14055	0.274742	0.817559	1	877
748	ACTIN FILAMENT BUNDLE ORGANIZATION%GOBP%GO:0061572	32	-0.306396	-1.14036	0.28165	0.817294	1	497
749	TRANSMEMBRANE TRANSPORT%GOBP%GO:0055085	325	-0.429725	-1.13976	0.176598	0.818619	1	1707
750	PID_AMB2_NEUTROPHILS_PATHWAY%MSIGDB_C2%PID_AMB2_NEUTROPHILS_PATHWAY	36	-0.343092	-1.13924	0.285307	0.819611	1	1020
751	ORGANOPHOSPHATE ESTER TRANSPORT%GOBP%GO:0015748	39	-0.279859	-1.13871	0.24858	0.820663	1	1008
752	BIOCARTA_INTEGRIN_PATHWAY%MSIGDB_C2%BIOCARTA_INTEGRIN_PATHWAY	31	-0.378748	-1.13758	0.306548	0.824286	1	1413
753	POSITIVE REGULATION OF BIOMINERAL TISSUE DEVELOPMENT%GOBP%GO:0070169	18	-0.441445	-1.13708	0.292835	0.825204	1	782
754	NEGATIVE REGULATION OF VASCULATURE DEVELOPMENT%GOBP%GO:1901343	57	-0.365375	-1.13645	0.249666	0.82667	1	684
755	COFACTOR METABOLIC PROCESS%GOBP%GO:0051186	279	-0.44224	-1.13582	0.199139	0.828189	1	1850
756	REGULATION OF REPRODUCTIVE PROCESS%GOBP%GO:2000241	26	-0.426097	-1.13569	0.272036	0.827609	1	1684
757	NUCLEOSIDE DIPHOSPHATE PHOSPHORYLATION%GOBP%GO:0006165	31	-0.391802	-1.13418	0.268041	0.832775	1	1850
758	POSITIVE REGULATION OF INSULIN SECRETION%GOBP%GO:0032024	15	-0.377001	-1.13412	0.321839	0.831977	1	1419
759	BIOCARTA_GPCR_PATHWAY%MSIGDB_C2%BIOCARTA_GPCR_PATHWAY	18	-0.344162	-1.13366	0.28681	0.832786	1	700
760	LIPOPROTEIN METABOLIC PROCESS%GOBP%GO:0042157	35	-0.364026	-1.13349	0.25942	0.832378	1	593
761	POSITIVE REGULATION OF CELL ACTIVATION%GOBP%GO:0050867	126	-0.432927	-1.13346	0.25448	0.831373	1	1016
762	POSITIVE REGULATION OF BONE MINERALIZATION%GOBP%GO:0030501	18	-0.31126	-1.13326	0.310236	0.831124	1	782
763	POSITIVE REGULATION OF TRANSCRIPTION BY RNA POLYMERASE II%GOBP%GO:0045944	248	-0.312328	-1.13314	0.2	0.830537	1	748
764	PROTEIN TARGETING TO ER%GOBP%GO:0045047	100	-0.306012	-1.13274	0.246575	0.831064	1	166
765	TRANSCRIPTION INITIATION FROM RNA POLYMERASE II PROMOTER%GOBP%GO:0006367	37	-0.28865	-1.13266	0.270115	0.830306	1	1547
766	FIBROBLAST GROWTH FACTOR RECEPTOR SIGNALING PATHWAY%GOBP%GO:0008543	41	-0.34187	-1.13224	0.277539	0.830862	1	1395
767	POSITIVE REGULATION OF PROTEIN DEPHOSPHORYLATION%GOBP%GO:0035307	19	-0.427739	-1.13178	0.277865	0.831633	1	1016
768	REGULATION OF BLOOD VESSEL ENDOTHELIAL CELL MIGRATION%GOBP%GO:0043535	47	-0.424241	-1.13143	0.261299	0.831916	1	784
769	RESPONSE TO UNFOLDED PROTEIN%GOBP%GO:0006986	74	-0.318638	-1.13136	0.251001	0.831125	1	1874
770	FATTY-ACYL-COA BIOSYNTHETIC PROCESS%GOBP%GO:0046949	15	-0.387153	-1.13074	0.302589	0.832551	1	1828
771	CARDIAC CONDUCTION%GOBP%GO:0061337	25	-0.401029	-1.12792	0.277439	0.842694	1	1484
772	ENDOTHELIAL CELL MIGRATION%GOBP%GO:0043542	35	-0.417503	-1.12648	0.289897	0.847335	1	752
773	REGULATION OF RESPONSE TO EXTERNAL STIMULUS%GOBP%GO:0032101	365	-0.335869	-1.1258	0.182397	0.849021	1	1016
774	SEMA4D INDUCED CELL MIGRATION AND GROWTH-CONE COLLAPSE%REACTOME%R-HSA-416572.3	16	-0.366859	-1.12558	0.310458	0.848841	1	752
775	BIOCARTA_FMLP_PATHWAY%MSIGDB_C2%BIOCARTA_FMLP_PATHWAY	22	-0.449211	-1.1249	0.312698	0.850485	1	944
776	AMB2 INTEGRIN SIGNALING%PATHWAY INTERACTION DATABASE NCI-NATURE CURATED DATA%AMB2 INTEGRIN SIGNALING	26	-0.305957	-1.12476	0.304676	0.84992	1	1672
777	ANTERIOR/POSTERIOR PATTERN SPECIFICATION%GOBP%GO:0009952	15	-0.440897	-1.12268	0.312698	0.857239	1	1393
778	NEGATIVE REGULATION OF PROTEIN CATABOLIC PROCESS%GOBP%GO:0042177	62	-0.448988	-1.12259	0.273698	0.856498	1	562
779	REGULATION OF NOTCH SIGNALING PATHWAY%GOBP%GO:0008593	42	-0.314974	-1.12252	0.264336	0.855701	1	679
780	DETECTION OF ABIOTIC STIMULUS%GOBP%GO:0009582	23	-0.426097	-1.11999	0.300623	0.86495	1	954
781	HIPPO-MERLIN SIGNALING DYSREGULATION%WIKIPATHWAYS_20210210%WP4541%HOMO SAPIENS	76	-0.385189	-1.11998	0.257937	0.863854	1	877
782	NEGATIVE REGULATION OF CELL-SUBSTRATE ADHESION%GOBP%GO:0010812	31	-0.447983	-1.11955	0.302985	0.864535	1	616
783	REGULATION OF MEMBRANE POTENTIAL%GOBP%GO:0042391	97	-0.31584	-1.11864	0.258838	0.867083	1	1484
784	MONOSACCHARIDE BIOSYNTHETIC PROCESS%GOBP%GO:0046364	37	-0.386869	-1.11791	0.322963	0.869025	1	1946
785	ORGANIC ANION TRANSPORT%GOBP%GO:0015711	151	-0.316077	-1.1179	0.257209	0.867994	1	1095
786	DEVELOPMENTAL CELL GROWTH%GOBP%GO:0048588	25	-0.326375	-1.11769	0.316188	0.867782	1	501
787	NEGATIVE REGULATION OF CELL ADHESION%GOBP%GO:0007162	114	-0.36667	-1.11724	0.252142	0.868579	1	754
788	PATHWAYS IN CLEAR CELL RENAL CELL CARCINOMA%WIKIPATHWAYS_20210210%WP4018%HOMO SAPIENS	58	-0.340289	-1.11713	0.284953	0.867884	1	1816
789	NUCLEOTIDE PHOSPHORYLATION%GOBP%GO:0046939	31	-0.367942	-1.11688	0.307806	0.867875	1	1850
790	MONOVALENT INORGANIC CATION TRANSPORT%GOBP%GO:0015672	77	-0.329215	-1.11668	0.262548	0.867587	1	1111
791	VASCULAR PROCESS IN CIRCULATORY SYSTEM%GOBP%GO:0003018	42	-0.337261	-1.11593	0.293371	0.869523	1	1802
792	POSITIVE REGULATION OF MYELOID CELL DIFFERENTIATION%GOBP%GO:0045639	30	-0.340267	-1.11544	0.322489	0.870394	1	1802
793	NEURONAL SYSTEM%REACTOME%R-HSA-112316.7	126	-0.305333	-1.11468	0.258182	0.87238	1	888
794	SARS-COV-2 INNATE IMMUNITY EVASION AND CELL-SPECIFIC IMMUNE RESPONSE%WIKIPATHWAYS_20210210%WP5039%HOMO SAPIENS	29	-0.374241	-1.1144	0.310345	0.872423	1	651
795	POSITIVE REGULATION OF FIBROBLAST PROLIFERATION%GOBP%GO:0048146	17	-0.403345	-1.11411	0.3344	0.872538	1	1402
796	NEGATIVE REGULATION OF WOUND HEALING%GOBP%GO:0061045	52	-0.437215	-1.11353	0.303401	0.873824	1	1090
797	POSITIVE REGULATION OF PEPTIDE HORMONE SECRETION%GOBP%GO:0090277	20	-0.410596	-1.11352	0.323391	0.872765	1	1463
798	O-GLYCOSYLATION OF TSR DOMAIN-CONTAINING PROTEINS%REACTOME DATABASE ID RELEASE 75%5173214	18	-0.380201	-1.11327	0.329636	0.872619	1	1305
799	POSITIVE REGULATION OF WOUND HEALING%GOBP%GO:0090303	36	-0.306693	-1.11321	0.294944	0.871768	1	873
800	TRNA CHARGING%HUMANCYC%TRNA-CHARGING-PWY	28	-0.320164	-1.1131	0.317841	0.871137	1	359
801	CALCIUM ION TRANSPORT INTO CYTOSOL%GOBP%GO:0060402	18	-0.422874	-1.11301	0.332822	0.87042	1	1691
802	CELLULAR RESPONSE TO RETINOIC ACID%GOBP%GO:0071300	16	-0.368802	-1.11229	0.31723	0.872297	1	1427
803	NEUROTRANSMITTER METABOLIC PROCESS%GOBP%GO:0042133	33	-0.382593	-1.11096	0.301136	0.87651	1	1513
804	SPHINGOLIPID METABOLISM%REACTOME%R-HSA-428157.4	42	-0.43113	-1.10977	0.312057	0.880204	1	867
805	REGULATION OF NEUTROPHIL MIGRATION%GOBP%GO:1902622	17	-0.395747	-1.10959	0.326954	0.879853	1	1296
806	RECEPTOR CLUSTERING%GOBP%GO:0043113	18	-0.334466	-1.10886	0.338095	0.881718	1	675
807	CARBOHYDRATE METABOLISM%REACTOME%R-HSA-71387.9	194	-0.370645	-1.10854	0.234568	0.881858	1	1917
808	NEUTRAL LIPID CATABOLIC PROCESS%GOBP%GO:0046461	15	-0.310584	-1.10796	0.341584	0.883152	1	937
809	PROTEIN ACYLATION%GOBP%GO:0043543	38	-0.413522	-1.10783	0.320233	0.882587	1	1128
810	BETA2 INTEGRIN CELL SURFACE INTERACTIONS%PATHWAY INTERACTION DATABASE NCI-NATURE CURATED DATA%BETA2 INTEGRIN CELL SURFACE INTERACTIONS	26	-0.427977	-1.10699	0.310789	0.884894	1	1011
811	NEGATIVE REGULATION OF AXONOGENESIS%GOBP%GO:0050771	29	-0.423454	-1.10646	0.324695	0.885911	1	837
812	REGULATION OF HEART CONTRACTION%GOBP%GO:0008016	68	-0.303865	-1.10591	0.3	0.88702	1	988
813	NEUREXINS AND NEUROLIGINS%REACTOME%R-HSA-6794361.4	23	-0.373711	-1.10581	0.325	0.88634	1	670
814	CELLULAR DEFENSE RESPONSE%GOBP%GO:0006968	17	-0.322299	-1.1053	0.354331	0.887419	1	1427
815	BIOCARTA_PROTEASOME_PATHWAY%MSIGDB_C2%BIOCARTA_PROTEASOME_PATHWAY	19	-0.374241	-1.1052	0.33439	0.886782	1	589
816	MORPHOGENESIS OF EMBRYONIC EPITHELIUM%GOBP%GO:0016331	21	-0.377467	-1.10498	0.313099	0.88662	1	1802
817	BIOCARTA_HDAC_PATHWAY%MSIGDB_C2%BIOCARTA_HDAC_PATHWAY	15	-0.340134	-1.10464	0.340062	0.886913	1	700
818	POSITIVE REGULATION OF LEUKOCYTE ACTIVATION%GOBP%GO:0002696	120	-0.417086	-1.10438	0.264892	0.88687	1	1016
819	PID_INTEGRIN2_PATHWAY%MSIGDB_C2%PID_INTEGRIN2_PATHWAY	26	-0.326323	-1.10425	0.310294	0.886266	1	1011
820	NEGATIVE REGULATION OF IMMUNE SYSTEM PROCESS%GOBP%GO:0002683	181	-0.366859	-1.10424	0.253378	0.885231	1	1016
821	LAMELLIPODIUM ASSEMBLY%GOBP%GO:0030032	17	-0.378868	-1.10359	0.339901	0.886808	1	2205
822	MESENCHYMAL CELL DIFFERENTIATION%GOBP%GO:0048762	56	-0.2756	-1.10358	0.289438	0.885745	1	938
823	RIBONUCLEOSIDE DIPHOSPHATE METABOLIC PROCESS%GOBP%GO:0009185	31	-0.363347	-1.10269	0.329851	0.888285	1	1850
824	NCAM1 INTERACTIONS%REACTOME%R-HSA-419037.1	19	-0.400007	-1.10251	0.325321	0.887894	1	1334
825	RESPONSE TO ANTINEOPLASTIC AGENT%GOBP%GO:0097327	19	-0.371919	-1.10189	0.328244	0.889381	1	1169
826	CELLULAR RESPONSE TO CALCIUM ION%GOBP%GO:0071277	30	-0.341868	-1.10182	0.336323	0.888592	1	1414
827	MEMBRANE LIPID CATABOLIC PROCESS%GOBP%GO:0046466	19	-0.363171	-1.10128	0.336391	0.889728	1	593
828	CELL GROWTH%GOBP%GO:0016049	25	-0.351867	-1.10114	0.337368	0.889227	1	501
829	ADIPOGENESIS%WIKIPATHWAYS_20210210%WP236%HOMO SAPIENS	41	-0.335278	-1.1009	0.313754	0.88911	1	1494
830	CIRCADIAN RHYTHM RELATED GENES%WIKIPATHWAYS_20210210%WP3594%HOMO SAPIENS	72	-0.352063	-1.10062	0.305374	0.889159	1	678
831	DIGESTIVE SYSTEM DEVELOPMENT%GOBP%GO:0055123	20	-0.419056	-1.10023	0.330233	0.889683	1	1714
832	NEGATIVE REGULATION OF CELL-MATRIX ADHESION%GOBP%GO:0001953	19	-0.403103	-1.09982	0.333333	0.890257	1	616
833	POSITIVE REGULATION OF NOTCH SIGNALING PATHWAY%GOBP%GO:0045747	22	-0.274128	-1.09937	0.319508	0.890941	1	679
834	PRION DISEASE PATHWAY%WIKIPATHWAYS_20210210%WP3995%HOMO SAPIENS	17	-0.427336	-1.09936	0.353583	0.889914	1	784
835	REGULATION OF T CELL ACTIVATION%GOBP%GO:0050863	102	-0.347866	-1.09856	0.282082	0.891979	1	1016
836	POSTTRANSCRIPTIONAL GENE SILENCING%GOBP%GO:0016441	31	-0.320127	-1.09828	0.324638	0.892032	1	608
837	CELLULAR RESPONSE TO VIRUS%GOBP%GO:0098586	21	-0.340134	-1.09825	0.341232	0.891083	1	638
838	CENTRAL NERVOUS SYSTEM DEVELOPMENT%GOBP%GO:0007417	224	-0.359461	-1.09787	0.261504	0.891586	1	1010
839	PHENOL-CONTAINING COMPOUND METABOLIC PROCESS%GOBP%GO:0018958	15	-0.363171	-1.0977	0.355487	0.891198	1	1649
840	ACYL-COA BIOSYNTHETIC PROCESS%GOBP%GO:0071616	22	-0.400388	-1.09729	0.322222	0.891778	1	1828
841	UROGENITAL SYSTEM DEVELOPMENT%GOBP%GO:0001655	72	-0.290241	-1.09715	0.302477	0.891307	1	928
842	REGULATION OF LYMPHOCYTE MIGRATION%GOBP%GO:2000401	21	-0.377371	-1.09691	0.329323	0.891182	1	534
843	PATHWAYS REGULATING HIPPO SIGNALING%WIKIPATHWAYS_20210210%WP4540%HOMO SAPIENS	59	-0.295557	-1.09669	0.31016	0.891015	1	951
844	REGULATION OF TUMOR NECROSIS FACTOR SUPERFAMILY CYTOKINE PRODUCTION%GOBP%GO:1903555	53	-0.349371	-1.09647	0.30303	0.890799	1	1712
845	DETECTION OF EXTERNAL STIMULUS%GOBP%GO:0009581	23	-0.396413	-1.09638	0.337313	0.890133	1	954
846	POSITIVE REGULATION OF PROTEIN LOCALIZATION TO NUCLEUS%GOBP%GO:1900182	41	-0.298973	-1.09573	0.34632	0.891756	1	751
847	NEGATIVE REGULATION OF TUMOR NECROSIS FACTOR SUPERFAMILY CYTOKINE PRODUCTION%GOBP%GO:1903556	15	-0.396406	-1.0952	0.33123	0.892845	1	1712
848	REGULATION OF TELOMERASE RNA LOCALIZATION TO CAJAL BODY%GOBP%GO:1904872	16	-0.354516	-1.09506	0.351181	0.892318	1	465
849	REGULATION OF REACTIVE OXYGEN SPECIES BIOSYNTHETIC PROCESS%GOBP%GO:1903426	30	-0.436678	-1.09496	0.330496	0.891624	1	173
850	POSITIVE REGULATION OF CELL ADHESION%GOBP%GO:0045785	186	-0.382593	-1.0948	0.272418	0.891196	1	1016
851	EXTRACELLULAR MATRIX ORGANIZATION%REACTOME%R-HSA-1474244.2	215	-0.394131	-1.09429	0.274376	0.892215	1	971
852	COMMON PATHWAYS UNDERLYING DRUG ADDICTION%WIKIPATHWAYS_20210210%WP2636%HOMO SAPIENS	24	-0.345926	-1.09398	0.333835	0.892338	1	978
853	NEGATIVE REGULATION OF HEMOSTASIS%GOBP%GO:1900047	41	-0.346123	-1.09389	0.312935	0.891654	1	1090
854	POSITIVE REGULATION OF IMMUNE EFFECTOR PROCESS%GOBP%GO:0002699	85	-0.361394	-1.09387	0.290038	0.890673	1	1833
855	NEGATIVE REGULATION OF INTRACELLULAR PROTEIN TRANSPORT%GOBP%GO:0090317	17	-0.354188	-1.09381	0.343558	0.889907	1	159
856	CELLULAR RESPONSE TO ORGANIC CYCLIC COMPOUND%GOBP%GO:0071407	115	-0.2885	-1.09345	0.288698	0.8903	1	1449
857	OVERVIEW OF LEUKOCYTE-INTRINSIC HIPPO PATHWAY FUNCTIONS%WIKIPATHWAYS_20210210%WP4542%HOMO SAPIENS	17	-0.418417	-1.09326	0.337461	0.889997	1	1774
858	CATION TRANSPORT%GOBP%GO:0006812	193	-0.375189	-1.09205	0.282998	0.89384	1	1111
859	FOCAL ADHESION-PI3K-AKT-MTOR-SIGNALING PATHWAY%WIKIPATHWAYS_20210210%WP3932%HOMO SAPIENS	158	-0.331846	-1.09195	0.290657	0.893212	1	888
860	GLYCOSYL COMPOUND METABOLIC PROCESS%GOBP%GO:1901657	67	-0.316279	-1.09163	0.337731	0.893428	1	1562
861	ENERGY METABOLISM%WIKIPATHWAYS_20210210%WP1541%HOMO SAPIENS	18	-0.403219	-1.09125	0.343354	0.893922	1	881
862	REGULATION OF ACTIVATED T CELL PROLIFERATION%GOBP%GO:0046006	16	-0.426127	-1.09002	0.350238	0.8979	1	1626
863	VITAMIN D RECEPTOR PATHWAY%WIKIPATHWAYS_20210210%WP2877%HOMO SAPIENS	68	-0.282521	-1.08992	0.312665	0.897204	1	1808
864	NUCLEOTIDE SALVAGE%REACTOME DATABASE ID RELEASE 75%8956321	15	-0.304883	-1.08972	0.343548	0.896955	1	1435
865	REGULATION OF IMMUNOGLOBULIN PRODUCTION%GOBP%GO:0002637	18	-0.40038	-1.08948	0.346093	0.896876	1	1016
866	NEGATIVE REGULATION OF RESPONSE TO EXTERNAL STIMULUS%GOBP%GO:0032102	172	-0.360551	-1.0894	0.28143	0.896169	1	1016
867	NERVOUS SYSTEM PROCESS%GOBP%GO:0050877	137	-0.379397	-1.08898	0.294048	0.89682	1	1003
868	THIOESTER BIOSYNTHETIC PROCESS%GOBP%GO:0035384	22	-0.375405	-1.0883	0.339036	0.898507	1	1828
869	NEGATIVE REGULATION OF CELL PROLIFERATION%GOBP%GO:0008285	204	-0.419086	-1.08723	0.301462	0.90174	1	971
870	POSITIVE REGULATION OF RESPONSE TO WOUNDING%GOBP%GO:1903036	38	-0.374189	-1.08722	0.313536	0.900743	1	1010
871	PROTEIN LOCALIZATION TO CELL SURFACE%GOBP%GO:0034394	17	-0.31079	-1.08605	0.331715	0.904422	1	1337
872	BMP SIGNALING PATHWAY%GOBP%GO:0030509	25	-0.35395	-1.08596	0.341317	0.903773	1	709
873	CELLULAR RESPONSE TO INORGANIC SUBSTANCE%GOBP%GO:0071241	67	-0.430447	-1.08461	0.34221	0.908084	1	1464
874	DIOL METABOLIC PROCESS%GOBP%GO:0034311	16	-0.278646	-1.08435	0.353968	0.907995	1	771
875	LEUKOCYTE MIGRATION%GOBP%GO:0050900	146	-0.382194	-1.08399	0.307334	0.908382	1	1452
876	ATR SIGNALING PATHWAY%PATHWAY INTERACTION DATABASE NCI-NATURE CURATED DATA%ATR SIGNALING PATHWAY	18	-0.278841	-1.08387	0.34345	0.907853	1	667
877	TP53 REGULATES METABOLIC GENES%REACTOME DATABASE ID RELEASE 75%5628897	48	-0.411968	-1.08294	0.353022	0.910666	1	578
878	KIDNEY DEVELOPMENT%GOBP%GO:0001822	63	-0.41172	-1.08218	0.337483	0.912691	1	928
879	EPIBOLY%GOBP%GO:0090504	19	-0.370887	-1.08207	0.36019	0.912098	1	797
880	LXRS REGULATE GENE EXPRESSION LINKED TO CHOLESTEROL TRANSPORT AND EFFLUX%REACTOME DATABASE ID RELEASE 75%9029569	15	-0.399542	-1.08135	0.372204	0.91402	1	989
881	AXONAL TRANSPORT%GOBP%GO:0098930	34	-0.360992	-1.08099	0.335799	0.914421	1	753
882	PHYSIOLOGICAL AND PATHOLOGICAL HYPERTROPHY OF THE HEART%WIKIPATHWAYS_20210210%WP1528%HOMO SAPIENS	16	-0.401399	-1.08046	0.373159	0.915482	1	700
883	EPIBOLY INVOLVED IN WOUND HEALING%GOBP%GO:0090505	18	-0.403061	-1.07972	0.359621	0.917438	1	797
884	HOMOPHILIC CELL ADHESION VIA PLASMA MEMBRANE ADHESION MOLECULES%GOBP%GO:0007156	37	-0.365427	-1.07956	0.342647	0.917037	1	1320
885	HUMORAL IMMUNE RESPONSE%GOBP%GO:0006959	110	-0.352281	-1.07941	0.32533	0.916599	1	1013
886	POSITIVE REGULATION OF EPITHELIAL CELL PROLIFERATION%GOBP%GO:0050679	65	-0.312814	-1.07883	0.324967	0.917826	1	1010
887	NEGATIVE REGULATION OF BLOOD COAGULATION%GOBP%GO:0030195	41	-0.313457	-1.07849	0.342697	0.918177	1	1090
888	NEGATIVE REGULATION OF CATION TRANSMEMBRANE TRANSPORT%GOBP%GO:1904063	33	-0.293835	-1.07789	0.365217	0.919495	1	988
889	HALLMARK_HYPOXIA%MSIGDB_C2%HALLMARK_HYPOXIA	117	-0.392158	-1.07775	0.321168	0.919022	1	1917
890	PLASMA LIPOPROTEIN CLEARANCE%REACTOME DATABASE ID RELEASE 75%8964043	26	-0.397081	-1.07773	0.339259	0.918068	1	872
891	REGULATION OF DEFENSE RESPONSE%GOBP%GO:0031347	398	-0.371691	-1.07715	0.267223	0.919316	1	945
892	PATHWAYS AFFECTED IN ADENOID CYSTIC CARCINOMA%WIKIPATHWAYS_20210210%WP3651%HOMO SAPIENS	26	-0.399987	-1.07712	0.37538	0.918437	1	714
893	REGULATION OF STEROID BIOSYNTHETIC PROCESS%GOBP%GO:0050810	16	-0.332928	-1.07662	0.383046	0.919431	1	709
894	TOLL-LIKE RECEPTOR SIGNALING PATHWAY%WIKIPATHWAYS_20210210%WP75%HOMO SAPIENS	36	-0.357089	-1.07624	0.352685	0.919964	1	638
895	REGULATION OF TRANSMEMBRANE RECEPTOR PROTEIN SERINE/THREONINE KINASE SIGNALING PATHWAY%GOBP%GO:0090092	91	-0.361481	-1.07606	0.330779	0.919626	1	710
896	PROTEIN LOCALIZATION TO ENDOPLASMIC RETICULUM%GOBP%GO:0070972	115	-0.319904	-1.07581	0.332515	0.919631	1	166
897	REGULATION OF CELL ADHESION%GOBP%GO:0030155	315	-0.392321	-1.07515	0.307856	0.921286	1	1016
898	MICROTUBULE-BASED TRANSPORT%GOBP%GO:0099111	70	-0.284485	-1.07499	0.34748	0.920884	1	1458
899	REGULATION OF TUMOR NECROSIS FACTOR PRODUCTION%GOBP%GO:0032680	50	-0.347339	-1.07492	0.361264	0.920134	1	1712
900	BIOCARTA_INTRINSIC_PATHWAY%MSIGDB_C2%BIOCARTA_INTRINSIC_PATHWAY	22	-0.317286	-1.07488	0.377301	0.919285	1	1559
901	EMBRYONIC ORGAN DEVELOPMENT%GOBP%GO:0048568	62	-0.370542	-1.07429	0.354381	0.920619	1	1846
902	REGULATION OF CELL KILLING%GOBP%GO:0031341	41	-0.405458	-1.07409	0.359833	0.920413	1	2347
903	RESPONSE TO LIPID%GOBP%GO:0033993	168	-0.375219	-1.07388	0.301402	0.920222	1	1449
904	PATTERN SPECIFICATION PROCESS%GOBP%GO:0007389	46	-0.344861	-1.07304	0.328169	0.922555	1	624
905	NEGATIVE REGULATION OF INFLAMMATORY RESPONSE%GOBP%GO:0050728	76	-0.406826	-1.07299	0.353548	0.921728	1	1578
906	POSITIVE REGULATION OF DEVELOPMENTAL GROWTH%GOBP%GO:0048639	35	-0.319487	-1.07259	0.34877	0.92232	1	666
907	PID_ATR_PATHWAY%MSIGDB_C2%PID_ATR_PATHWAY	18	-0.285242	-1.07245	0.368902	0.921892	1	667
908	TRANSPORT ALONG MICROTUBULE%GOBP%GO:0010970	70	-0.323557	-1.07227	0.350066	0.92159	1	1458
909	GENE SILENCING BY MIRNA%GOBP%GO:0035195	25	-0.38544	-1.07118	0.369369	0.924878	1	608
910	ACYLGLYCEROL CATABOLIC PROCESS%GOBP%GO:0046464	15	-0.305741	-1.07031	0.39	0.927306	1	937
911	HALLMARK_XENOBIOTIC_METABOLISM%MSIGDB_C2%HALLMARK_XENOBIOTIC_METABOLISM	130	-0.366547	-1.06898	0.330085	0.931585	1	1704
912	NEGATIVE REGULATION OF CELL GROWTH%GOBP%GO:0030308	71	-0.400065	-1.06838	0.339498	0.933007	1	1353
913	REGULATION OF TYROSINE PHOSPHORYLATION OF STAT PROTEIN%GOBP%GO:0042509	16	-0.303644	-1.06799	0.385366	0.933547	1	1409
914	REGULATION OF LIPID METABOLIC PROCESS%GOBP%GO:0019216	123	-0.325043	-1.06795	0.334975	0.932705	1	1802
915	REGULATION OF LYMPHOCYTE ACTIVATION%GOBP%GO:0051249	134	-0.388827	-1.06793	0.322695	0.931753	1	1016
916	RENAL SYSTEM DEVELOPMENT%GOBP%GO:0072001	65	-0.397183	-1.0672	0.354667	0.93369	1	928
917	COLLAGEN DEGRADATION%REACTOME DATABASE ID RELEASE 75%1442490	24	-0.378676	-1.06713	0.358814	0.932922	1	681
918	PURINE-CONTAINING COMPOUND CATABOLIC PROCESS%GOBP%GO:0072523	22	-0.389865	-1.06667	0.361669	0.933785	1	2192
919	PLASMA LIPOPROTEIN ASSEMBLY%REACTOME DATABASE ID RELEASE 75%8963898	16	-0.383606	-1.0658	0.378205	0.936224	1	1704
920	SARS-COV INFECTIONS%REACTOME DATABASE ID RELEASE 75%9679506	93	-0.37931	-1.06552	0.361042	0.936324	1	768
921	HSF1-DEPENDENT TRANSACTIVATION%REACTOME%R-HSA-3371571.1	18	-0.31345	-1.06549	0.372204	0.935385	1	679
922	PID_SYNDECAN_1_PATHWAY%MSIGDB_C2%PID_SYNDECAN_1_PATHWAY	40	-0.380628	-1.06519	0.348189	0.935519	1	684
923	POSITIVE REGULATION OF OXIDOREDUCTASE ACTIVITY%GOBP%GO:0051353	16	-0.394923	-1.06516	0.367047	0.934639	1	965
924	NEGATIVE REGULATION OF COAGULATION%GOBP%GO:0050819	42	-0.333527	-1.06485	0.371191	0.934822	1	1090
925	ORGANOPHOSPHATE BIOSYNTHETIC PROCESS%GOBP%GO:0090407	257	-0.386057	-1.06437	0.325556	0.935668	1	1872
926	DIVALENT METAL ION TRANSPORT%GOBP%GO:0070838	60	-0.38196	-1.06368	0.37047	0.937377	1	1778
927	CELL AGING%GOBP%GO:0007569	23	-0.316544	-1.06343	0.380518	0.937353	1	607
928	REGULATION OF SMOOTH MUSCLE CELL MIGRATION%GOBP%GO:0014910	25	-0.36072	-1.06328	0.358663	0.936938	1	1496
929	EPITHELIAL TUBE MORPHOGENESIS%GOBP%GO:0060562	57	-0.379683	-1.0632	0.320833	0.93627	1	666
930	DETECTION OF STIMULUS%GOBP%GO:0051606	67	-0.292959	-1.06311	0.361222	0.935614	1	1003
931	TRANS-SYNAPTIC SIGNALING%GOBP%GO:0099537	101	-0.317369	-1.06306	0.342169	0.934781	1	1534
932	NEGATIVE REGULATION OF HEMOPOIESIS%GOBP%GO:1903707	35	-0.374182	-1.063	0.365964	0.934037	1	999
933	AXO-DENDRITIC TRANSPORT%GOBP%GO:0008088	38	-0.378636	-1.06289	0.367435	0.933477	1	1458
934	NEGATIVE REGULATION OF CELLULAR PROTEIN CATABOLIC PROCESS%GOBP%GO:1903363	41	-0.311229	-1.06275	0.389213	0.933052	1	481
935	S1P2 PATHWAY%PATHWAY INTERACTION DATABASE NCI-NATURE CURATED DATA%S1P2 PATHWAY	18	-0.391233	-1.06204	0.365506	0.93491	1	162
936	REGULATION OF PRI-MIRNA TRANSCRIPTION BY RNA POLYMERASE II%GOBP%GO:1902893	15	-0.336411	-1.0619	0.395498	0.934442	1	666
937	HEXOSE BIOSYNTHETIC PROCESS%GOBP%GO:0019319	33	-0.365589	-1.06155	0.365103	0.934837	1	1946
938	CELL-CELL SIGNALING%GOBP%GO:0007267	295	-0.384973	-1.06062	0.314595	0.937553	1	789
939	CALCIUM ION TRANSMEMBRANE IMPORT INTO CYTOSOL%GOBP%GO:0097553	17	-0.351872	-1.05989	0.37931	0.939388	1	1691
940	NEGATIVE REGULATION OF PROTEOLYSIS%GOBP%GO:0045861	142	-0.364878	-1.05984	0.359189	0.938605	1	1023
941	PID_P38_ALPHA_BETA_DOWNSTREAM_PATHWAY%MSIGDB_C2%PID_P38_ALPHA_BETA_DOWNSTREAM_PATHWAY	18	-0.36072	-1.05874	0.374808	0.941905	1	716
942	REGULATION OF B CELL PROLIFERATION%GOBP%GO:0030888	17	-0.36768	-1.05799	0.384496	0.943876	1	1622
943	GLUCONEOGENESIS%GOBP%GO:0006094	30	-0.377524	-1.05792	0.396755	0.943155	1	1946
944	ORGANIC CYCLIC COMPOUND BIOSYNTHETIC PROCESS%GOBP%GO:1901362	473	-0.320399	-1.0571	0.318135	0.945323	1	1520
945	POSITIVE REGULATION OF OSSIFICATION%GOBP%GO:0045778	33	-0.255928	-1.05687	0.394303	0.945238	1	1449
946	KIDNEY EPITHELIUM DEVELOPMENT%GOBP%GO:0072073	24	-0.329284	-1.05637	0.384969	0.946163	1	1449
947	IL-18 SIGNALING PATHWAY%WIKIPATHWAYS_20210210%WP4754%HOMO SAPIENS	142	-0.30508	-1.05497	0.35446	0.950732	1	1567
948	PLASMA LIPOPROTEIN PARTICLE CLEARANCE%GOBP%GO:0034381	34	-0.330928	-1.05493	0.380178	0.949847	1	1769
949	POSITIVE REGULATION OF CELLULAR CARBOHYDRATE METABOLIC PROCESS%GOBP%GO:0010676	18	-0.356668	-1.05455	0.377953	0.950367	1	1589
950	TRANSLATIONAL TERMINATION%GOBP%GO:0006415	37	-0.277384	-1.05449	0.378613	0.949574	1	1223
951	MEMBRANE INVAGINATION%GOBP%GO:0010324	30	-0.258304	-1.05447	0.376855	0.948657	1	974
952	REGULATION OF GLIAL CELL DIFFERENTIATION%GOBP%GO:0045685	16	-0.305039	-1.05359	0.391576	0.951162	1	638
953	NEGATIVE REGULATION OF IMMUNE EFFECTOR PROCESS%GOBP%GO:0002698	43	-0.384412	-1.0529	0.397878	0.952853	1	1833
954	VESICLE-MEDIATED TRANSPORT IN SYNAPSE%GOBP%GO:0099003	56	-0.329825	-1.05275	0.382114	0.952409	1	1348
955	NEGATIVE REGULATION OF GROWTH%GOBP%GO:0045926	81	-0.31628	-1.05217	0.357424	0.953717	1	1353
956	REGULATION OF JAK-STAT CASCADE%GOBP%GO:0046425	28	-0.27163	-1.05192	0.387692	0.95372	1	1427
957	POSITIVE REGULATION OF NUCLEIC ACID-TEMPLATED TRANSCRIPTION%GOBP%GO:1903508	355	-0.29761	-1.0519	0.35138	0.952767	1	754
958	PID_S1P_S1P2_PATHWAY%MSIGDB_C2%PID_S1P_S1P2_PATHWAY	18	-0.288816	-1.05187	0.400958	0.951893	1	162
959	AMINO ACID IMPORT ACROSS PLASMA MEMBRANE%GOBP%GO:0089718	16	-0.293937	-1.05151	0.395238	0.952316	1	9
960	TRANSCRIPTIONAL REGULATION BY TP53%REACTOME%R-HSA-3700989.6	174	-0.288961	-1.05148	0.349024	0.951435	1	698
961	CENTRAL NERVOUS SYSTEM NEURON DEVELOPMENT%GOBP%GO:0021954	26	-0.330451	-1.05139	0.394081	0.950798	1	1430
962	RESPONSE TO BMP%GOBP%GO:0071772	27	-0.375823	-1.05125	0.378102	0.950339	1	709
963	MODULATION BY HOST OF VIRAL PROCESS%GOBP%GO:0044788	15	-0.311366	-1.05104	0.392744	0.950233	1	782
964	POSITIVE REGULATION OF MACROMOLECULE BIOSYNTHETIC PROCESS%GOBP%GO:0010557	459	-0.304679	-1.05076	0.345473	0.950296	1	754
965	WOUND HEALING, SPREADING OF CELLS%GOBP%GO:0044319	18	-0.293551	-1.05072	0.400982	0.949455	1	797
966	ANTIGEN PRESENTATION: FOLDING, ASSEMBLY AND PEPTIDE LOADING OF CLASS I MHC%REACTOME DATABASE ID RELEASE 75%983170	24	-0.296143	-1.05061	0.381737	0.948909	1	804
967	POSITIVE REGULATION OF DEVELOPMENTAL PROCESS%GOBP%GO:0051094	431	-0.344284	-1.05049	0.346514	0.948416	1	1010
968	POSITIVE REGULATION OF TRANSCRIPTION, DNA-TEMPLATED%GOBP%GO:0045893	355	-0.333388	-1.05041	0.330526	0.947723	1	754
969	NEGATIVE REGULATION OF CALCIUM-MEDIATED SIGNALING%GOBP%GO:0050849	16	-0.281322	-1.05013	0.378505	0.94786	1	123
970	CELLULAR RESPONSE TO OXIDATIVE STRESS%GOBP%GO:0034599	101	-0.361688	-1.04971	0.380124	0.948456	1	1809
971	TRANSFORMING GROWTH FACTOR BETA RECEPTOR SIGNALING PATHWAY%GOBP%GO:0007179	48	-0.358724	-1.04913	0.394109	0.949808	1	628
972	REGULATION OF BLOOD CIRCULATION%GOBP%GO:1903522	75	-0.343178	-1.04868	0.378307	0.950576	1	988
973	HALLMARK_COAGULATION%MSIGDB_C2%HALLMARK_COAGULATION	117	-0.342934	-1.04862	0.37799	0.949818	1	1011
974	ESTABLISHMENT OR MAINTENANCE OF EPITHELIAL CELL APICAL/BASAL POLARITY%GOBP%GO:0045197	22	-0.352051	-1.04813	0.399381	0.950704	1	1217
975	CELL-CELL JUNCTION ORGANIZATION%REACTOME%R-HSA-421270.5	35	-0.298632	-1.0479	0.382824	0.95063	1	757
976	ION TRANSMEMBRANE TRANSPORT%GOBP%GO:0034220	191	-0.274612	-1.04783	0.364896	0.949888	1	1726
977	ANTEROGRADE TRANS-SYNAPTIC SIGNALING%GOBP%GO:0098916	97	-0.350594	-1.04717	0.394095	0.951469	1	1534
978	SULFUR COMPOUND BIOSYNTHETIC PROCESS%GOBP%GO:0044272	103	-0.338826	-1.04716	0.380832	0.950542	1	1386
979	NEGATIVE REGULATION OF DEVELOPMENTAL PROCESS%GOBP%GO:0051093	261	-0.280476	-1.04694	0.364035	0.950401	1	1468
980	DISEASES OF PROGRAMMED CELL DEATH%REACTOME%R-HSA-9645723.3	17	-0.253242	-1.04567	0.421851	0.954386	1	1112
981	POSITIVE REGULATION OF RNA BIOSYNTHETIC PROCESS%GOBP%GO:1902680	356	-0.281174	-1.04493	0.349947	0.956289	1	754
982	RESPONSE TO ALCOHOL%GOBP%GO:0097305	35	-0.310314	-1.04468	0.403983	0.956317	1	1464
983	PROTEIN LIPIDATION%GOBP%GO:0006497	21	-0.344284	-1.04401	0.402439	0.957987	1	526
984	REGULATION OF STEROID METABOLIC PROCESS%GOBP%GO:0019218	29	-0.360582	-1.044	0.405605	0.957048	1	1504
985	NEGATIVE REGULATION OF BMP SIGNALING PATHWAY%GOBP%GO:0030514	19	-0.328458	-1.04395	0.408585	0.956242	1	628
986	POSITIVE REGULATION OF CELLULAR BIOSYNTHETIC PROCESS%GOBP%GO:0031328	489	-0.371369	-1.04387	0.359184	0.955597	1	754
987	CELLULAR RESPONSE TO BMP STIMULUS%GOBP%GO:0071773	27	-0.275755	-1.04364	0.401449	0.955512	1	709
988	TRANSLATIONAL ELONGATION%GOBP%GO:0006414	46	-0.337506	-1.04357	0.393646	0.954825	1	1223
989	DIVALENT INORGANIC CATION TRANSPORT%GOBP%GO:0072511	60	-0.328606	-1.04321	0.397241	0.955238	1	1778
990	ADAPTIVE IMMUNE RESPONSE BASED ON SOMATIC RECOMBINATION OF IMMUNE RECEPTORS BUILT FROM IMMUNOGLOBULIN SUPERFAMILY DOMAINS%GOBP%GO:0002460	36	-0.320138	-1.04321	0.39049	0.954287	1	754
991	POSITIVE REGULATION OF ALPHA-BETA T CELL ACTIVATION%GOBP%GO:0046635	20	-0.338835	-1.0429	0.409786	0.954531	1	754
992	FORMATION OF THE EARLY ELONGATION COMPLEX%REACTOME DATABASE ID RELEASE 75%113418	24	-0.330283	-1.04285	0.400309	0.953753	1	1382
993	DEFECTIVE B3GALTL CAUSES PETERS-PLUS SYNDROME (PPS)%REACTOME%R-HSA-5083635.1	17	-0.358859	-1.04257	0.396104	0.953857	1	1305
994	POSITIVE REGULATION OF B CELL ACTIVATION%GOBP%GO:0050871	23	-0.324776	-1.04242	0.441133	0.953476	1	1016
995	POSITIVE REGULATION OF HEMOPOIESIS%GOBP%GO:1903708	58	-0.318231	-1.04231	0.411765	0.952934	1	1000
996	PHASE II - CONJUGATION OF COMPOUNDS%REACTOME DATABASE ID RELEASE 75%156580	57	-0.280476	-1.04206	0.403743	0.95293	1	1746
997	PARADOXICAL ACTIVATION OF RAF SIGNALING BY KINASE INACTIVE BRAF%REACTOME%R-HSA-6802955.2	32	-0.308626	-1.04114	0.396055	0.955473	1	978
998	POSITIVE REGULATION OF BIOSYNTHETIC PROCESS%GOBP%GO:0009891	498	-0.377558	-1.0408	0.372934	0.955867	1	754
999	LYMPHOCYTE ACTIVATION%GOBP%GO:0046649	96	-0.375684	-1.04065	0.359853	0.955465	1	1856
1000	COLLAGEN CHAIN TRIMERIZATION%REACTOME DATABASE ID RELEASE 75%8948216	30	-0.348165	-1.04042	0.405444	0.955395	1	684
1001	SIGNALING BY MODERATE KINASE ACTIVITY BRAF MUTANTS%REACTOME DATABASE ID RELEASE 75%6802946	32	-0.347601	-1.03988	0.419881	0.95647	1	978
1002	ETHANOL EFFECTS ON HISTONE MODIFICATIONS%WIKIPATHWAYS_20210210%WP3996%HOMO SAPIENS	19	-0.289351	-1.03944	0.416667	0.957193	1	743
1003	REGULATION OF CELL SHAPE%GOBP%GO:0008360	64	-0.309752	-1.03924	0.38911	0.957008	1	1158
1004	TOLL-LIKE RECEPTOR SIGNALING PATHWAY%GOBP%GO:0002224	51	-0.358009	-1.0371	0.417808	0.964356	1	556
1005	PKMTS METHYLATE HISTONE LYSINES%REACTOME%R-HSA-3214841.3	22	-0.281109	-1.0366	0.419697	0.965316	1	460
1006	SKELETAL SYSTEM MORPHOGENESIS%GOBP%GO:0048705	29	-0.345248	-1.03584	0.404288	0.967274	1	877
1007	FORMATION OF THE HIV-1 EARLY ELONGATION COMPLEX%REACTOME DATABASE ID RELEASE 75%167158	24	-0.30344	-1.03533	0.419075	0.968293	1	1382
1008	REGULATION OF HEMOPOIESIS%GOBP%GO:1903706	165	-0.342112	-1.03449	0.392065	0.970671	1	1011
1009	SIGNALING BY RAS MUTANTS%REACTOME%R-HSA-6802949.2	32	-0.295875	-1.03441	0.398827	0.970021	1	978
1010	REGULATION OF DNA REPLICATION%GOBP%GO:0006275	28	-0.324776	-1.03389	0.418803	0.971027	1	714
1011	GAMETE GENERATION%GOBP%GO:0007276	86	-0.307381	-1.03344	0.396907	0.971722	1	530
1012	REGULATION OF PATHWAY-RESTRICTED SMAD PROTEIN PHOSPHORYLATION%GOBP%GO:0060393	26	-0.333554	-1.03207	0.411765	0.975983	1	1449
1013	OXIDOREDUCTION COENZYME METABOLIC PROCESS%GOBP%GO:0006733	73	-0.363323	-1.03192	0.398943	0.975574	1	1894
1014	CHEMICAL SYNAPTIC TRANSMISSION%GOBP%GO:0007268	97	-0.338365	-1.03174	0.404092	0.975293	1	1534
1015	RESPONSE TO TOPOLOGICALLY INCORRECT PROTEIN%GOBP%GO:0035966	84	-0.310514	-1.03157	0.392053	0.975033	1	1874
1016	REGULATION OF DNA-TEMPLATED TRANSCRIPTION, INITIATION%GOBP%GO:2000142	30	-0.315772	-1.03139	0.426667	0.974804	1	638
1017	NEGATIVE REGULATION OF INFLAMMATORY RESPONSE TO ANTIGENIC STIMULUS%GOBP%GO:0002862	36	-0.303248	-1.03087	0.404993	0.975851	1	1672
1018	REGULATION OF EPITHELIAL CELL DIFFERENTIATION%GOBP%GO:0030856	42	-0.351715	-1.0308	0.405135	0.97516	1	666
1019	HALLMARK_COMPLEMENT%MSIGDB_C2%HALLMARK_COMPLEMENT	143	-0.347551	-1.03053	0.417928	0.97522	1	1011
1020	CELLULAR RESPONSE TO UNFOLDED PROTEIN%GOBP%GO:0034620	59	-0.344233	-1.03052	0.407303	0.97431	1	1784
1021	COENZYME BIOSYNTHETIC PROCESS%GOBP%GO:0009108	87	-0.262522	-1.0298	0.404118	0.976146	1	1850
1022	ADHERENS JUNCTIONS INTERACTIONS%REACTOME DATABASE ID RELEASE 75%418990	20	-0.349325	-1.0296	0.416933	0.975949	1	757
1023	NUCLEOBASE CATABOLISM%REACTOME DATABASE ID RELEASE 75%8956319	19	-0.363323	-1.0293	0.451565	0.976198	1	2153
1024	PI3K-AKT SIGNALING PATHWAY%WIKIPATHWAYS_20210210%WP4172%HOMO SAPIENS	155	-0.351715	-1.02907	0.400474	0.976096	1	895
1025	REGULATION OF NEUROLOGICAL SYSTEM PROCESS%GOBP%GO:0031644	26	-0.347601	-1.02883	0.424739	0.976046	1	464
1026	NEGATIVE REGULATION OF CELL MORPHOGENESIS INVOLVED IN DIFFERENTIATION%GOBP%GO:0010771	39	-0.350781	-1.02848	0.423944	0.976475	1	837
1027	POSITIVE REGULATION OF BLOOD VESSEL ENDOTHELIAL CELL MIGRATION%GOBP%GO:0043536	30	-0.347601	-1.02819	0.424153	0.976631	1	784
1028	PYRUVATE BIOSYNTHETIC PROCESS%GOBP%GO:0042866	29	-0.318206	-1.02785	0.411095	0.977021	1	1850
1029	POSITIVE REGULATION OF PEPTIDYL-TYROSINE PHOSPHORYLATION%GOBP%GO:0050731	57	-0.346826	-1.02716	0.422497	0.978724	1	1427
1030	PID_AVB3_INTEGRIN_PATHWAY%MSIGDB_C2%PID_AVB3_INTEGRIN_PATHWAY	63	-0.28971	-1.02683	0.426336	0.979071	1	787
1031	NETRIN-UNC5B SIGNALING PATHWAY%WIKIPATHWAYS_20210210%WP4747%HOMO SAPIENS	36	-0.289037	-1.02672	0.408511	0.978532	1	558
1032	CARBOHYDRATE DERIVATIVE CATABOLIC PROCESS%GOBP%GO:1901136	102	-0.340429	-1.02663	0.428753	0.977918	1	1569
1033	NEURAL CREST DIFFERENTIATION%WIKIPATHWAYS_20210210%WP2064%HOMO SAPIENS	28	-0.331534	-1.02585	0.433083	0.979888	1	784
1034	SULFUR COMPOUND TRANSPORT%GOBP%GO:0072348	16	-0.327367	-1.02537	0.444265	0.980774	1	740
1035	REGULATION OF B CELL ACTIVATION%GOBP%GO:0050864	32	-0.289376	-1.0243	0.421598	0.983952	1	1401
1036	FORMATION OF FIBRIN CLOT (CLOTTING CASCADE)%REACTOME DATABASE ID RELEASE 75%140877	38	-0.343789	-1.02396	0.432277	0.984273	1	1648
1037	REGULATION OF SYSTEMIC ARTERIAL BLOOD PRESSURE%GOBP%GO:0003073	27	-0.29875	-1.02362	0.44204	0.984667	1	603
1038	EMBRYONIC SKELETAL SYSTEM DEVELOPMENT%GOBP%GO:0048706	17	-0.335592	-1.02326	0.436137	0.985105	1	1337
1039	GTP METABOLIC PROCESS%GOBP%GO:0046039	15	-0.347601	-1.02302	0.438333	0.985067	1	1461
1040	POSITIVE REGULATION OF REACTIVE OXYGEN SPECIES BIOSYNTHETIC PROCESS%GOBP%GO:1903428	15	-0.285064	-1.02225	0.423567	0.987031	1	173
1041	NEGATIVE REGULATION OF RESPONSE TO WOUNDING%GOBP%GO:1903035	59	-0.303149	-1.02047	0.424767	0.992822	1	1090
1042	A TETRASACCHARIDE LINKER SEQUENCE IS REQUIRED FOR GAG SYNTHESIS%REACTOME DATABASE ID RELEASE 75%1971475	21	-0.351714	-1.02028	0.429022	0.992584	1	665
1043	C-MYB TRANSCRIPTION FACTOR NETWORK%PATHWAY INTERACTION DATABASE NCI-NATURE CURATED DATA%C-MYB TRANSCRIPTION FACTOR NETWORK	40	-0.31879	-1.02021	0.434043	0.99192	1	962
1044	NEGATIVE REGULATION OF NEURON APOPTOTIC PROCESS%GOBP%GO:0043524	24	-0.332186	-1.0197	0.444613	0.992869	1	1976
1045	NEGATIVE REGULATION OF ENDOPEPTIDASE ACTIVITY%GOBP%GO:0010951	83	-0.345245	-1.01875	0.428212	0.995482	1	1023
1046	GPVI-MEDIATED ACTIVATION CASCADE%REACTOME DATABASE ID RELEASE 75%114604	26	-0.304847	-1.01869	0.460486	0.994738	1	1218
1047	POSITIVE REGULATION OF HEMOSTASIS%GOBP%GO:1900048	18	-0.317161	-1.01819	0.437026	0.995623	1	873
1048	SIGNALING DOWNSTREAM OF RAS MUTANTS%REACTOME DATABASE ID RELEASE 75%9649948	32	-0.281859	-1.01745	0.445748	0.997571	1	978
1049	MICROTUBULE NUCLEATION%GOBP%GO:0007020	17	-0.318011	-1.01736	0.451667	0.996958	1	285
1050	AMYLOID-BETA CLEARANCE%GOBP%GO:0097242	17	-0.333421	-1.01685	0.430213	0.997951	1	685
1051	PID_CMYB_PATHWAY%MSIGDB_C2%PID_CMYB_PATHWAY	40	-0.336527	-1.01632	0.44206	0.998991	1	962
1052	POSITIVE REGULATION OF DNA METABOLIC PROCESS%GOBP%GO:0051054	89	-0.25003	-1.01591	0.424433	0.999642	1	751
1053	PIGMENT GRANULE ORGANIZATION%GOBP%GO:0048753	15	-0.32013	-1.01528	0.422034	1	1	432
1054	DISEASES OF METABOLISM%REACTOME%R-HSA-5668914.3	145	-0.327953	-1.01492	0.446809	1	1	1720
1055	THE ROLE OF GTSE1 IN G2 M PROGRESSION AFTER G2 CHECKPOINT%REACTOME DATABASE ID RELEASE 75%8852276	52	-0.336587	-1.01487	0.424242	1	1	589
1056	MONONUCLEAR CELL PROLIFERATION%GOBP%GO:0032943	15	-0.29315	-1.01475	0.467717	1	1	1679
1057	NEGATIVE CHEMOTAXIS%GOBP%GO:0050919	22	-0.280954	-1.01459	0.435312	0.999756	1	1369
1058	MRNA MODIFICATION%GOBP%GO:0016556	15	-0.260842	-1.01438	0.444262	0.99967	1	436
1059	NEGATIVE REGULATION OF CELL DIFFERENTIATION%GOBP%GO:0045596	179	-0.287484	-1.01293	0.453089	1	1	1597
1060	LEUKOCYTE PROLIFERATION%GOBP%GO:0070661	18	-0.281859	-1.0129	0.446571	1	1	1679
1061	TRANSCRIPTION INITIATION FROM RNA POLYMERASE I PROMOTER%GOBP%GO:0006361	16	-0.325511	-1.0118	0.443902	1	1	1382
1062	CELLULAR RESPONSE TO TRANSFORMING GROWTH FACTOR BETA STIMULUS%GOBP%GO:0071560	57	-0.315577	-1.01175	0.451268	1	1	628
1063	DNA GEOMETRIC CHANGE%GOBP%GO:0032392	35	-0.305894	-1.01091	0.45706	1	1	720
1064	REGULATION OF CELL PROLIFERATION%GOBP%GO:0042127	474	-0.27787	-1.01072	0.460268	1	1	1455
1065	POSITIVE REGULATION OF COAGULATION%GOBP%GO:0050820	18	-0.301409	-1.01016	0.443096	1	1	873
1066	GLAND MORPHOGENESIS%GOBP%GO:0022612	15	-0.322786	-1.00837	0.454545	1	1	664
1067	S1P1 PATHWAY%PATHWAY INTERACTION DATABASE NCI-NATURE CURATED DATA%S1P1 PATHWAY	16	-0.25216	-1.00821	0.46395	1	1	603
1068	POSITIVE REGULATION OF T CELL PROLIFERATION%GOBP%GO:0042102	37	-0.269199	-1.00771	0.458944	1	1	1671
1069	CELLULAR CARBOHYDRATE BIOSYNTHETIC PROCESS%GOBP%GO:0034637	27	-0.250969	-1.00739	0.464122	1	1	1281
1070	RESPONSE TO CALCIUM ION%GOBP%GO:0051592	50	-0.301416	-1.00734	0.441096	1	1	1008
1071	RESPONSE TO TRANSFORMING GROWTH FACTOR BETA%GOBP%GO:0071559	61	-0.29029	-1.00727	0.454912	1	1	628
1072	DISEASES ASSOCIATED WITH O-GLYCOSYLATION OF PROTEINS%REACTOME DATABASE ID RELEASE 75%3906995	35	-0.299859	-1.00689	0.456772	1	1	1379
1073	PTERIDINE-CONTAINING COMPOUND METABOLIC PROCESS%GOBP%GO:0042558	21	-0.255741	-1.00548	0.448795	1	1	1513
1074	22Q11.2 COPY NUMBER VARIATION SYNDROME%WIKIPATHWAYS_20210210%WP4657%HOMO SAPIENS	56	-0.287303	-1.00545	0.456022	1	1	1011
1075	MULTICELLULAR ORGANISM REPRODUCTION%GOBP%GO:0032504	101	-0.299283	-1.00524	0.457433	1	1	901
1076	TRANSPORT OF SMALL MOLECULES%REACTOME%R-HSA-382551.5	348	-0.288786	-1.00491	0.458686	1	1	989
1077	RESPONSE TO AMYLOID-BETA%GOBP%GO:1904645	26	-0.255741	-1.00485	0.448949	1	1	652
1078	REGULATION OF VASCULAR PERMEABILITY%GOBP%GO:0043114	17	-0.28731	-1.00424	0.469579	1	1	1370
1079	NAD BIOSYNTHETIC PROCESS%GOBP%GO:0009435	36	-0.300358	-1.00424	0.46657	1	1	1850
1080	SIGNALING BY FGFR2 IIIA TM%REACTOME DATABASE ID RELEASE 75%8851708	16	-0.303382	-1.00401	0.45	1	1	1364
1081	NEGATIVE REGULATION OF LIPID METABOLIC PROCESS%GOBP%GO:0045833	27	-0.282527	-1.00363	0.458396	1	1	1573
1082	REGULATION OF DNA METABOLIC PROCESS%GOBP%GO:0051052	166	-0.299283	-1.0034	0.457109	1	1	751
1083	RESPONSE TO ENDOPLASMIC RETICULUM STRESS%GOBP%GO:0034976	121	-0.267794	-1.00226	0.46837	1	1	1786
1084	SYNAPTIC SIGNALING%GOBP%GO:0099536	104	-0.259303	-1.00224	0.472325	1	1	1534
1085	REGULATION OF PHOSPHATASE ACTIVITY%GOBP%GO:0010921	49	-0.268796	-1.00153	0.456825	1	1	730
1086	POSITIVE REGULATION OF BLOOD COAGULATION%GOBP%GO:0030194	18	-0.292911	-1.00144	0.467512	1	1	873
1087	CELLULAR POTASSIUM ION TRANSPORT%GOBP%GO:0071804	28	-0.260886	-1.00114	0.467919	1	1	1659
1088	ANION TRANSPORT%GOBP%GO:0006820	177	-0.267804	-1.00111	0.478413	1	1	1008
1089	RESPONSE TO TOXIC SUBSTANCE%GOBP%GO:0009636	78	-0.272665	-1.00031	0.461738	1	1	1464
1090	REGULATION OF METAL ION TRANSPORT%GOBP%GO:0010959	113	-0.275821	-1.00009	0.470158	1	1	892
1091	LEISHMANIA INFECTION%REACTOME%R-HSA-9658195.2	103	-0.241149	-0.999744	0.472401	1	1	974
1092	POSITIVE REGULATION OF CELL PROLIFERATION%GOBP%GO:0008284	275	-0.269539	-0.998596	0.486081	1	1	1687
1093	REGULATION OF INFLAMMATORY RESPONSE TO ANTIGENIC STIMULUS%GOBP%GO:0002861	40	-0.260411	-0.998561	0.473381	1	1	945
1094	VESICLE CYTOSKELETAL TRAFFICKING%GOBP%GO:0099518	38	-0.209651	-0.998292	0.471347	1	1	1445
1095	CYTOPLASMIC MICROTUBULE ORGANIZATION%GOBP%GO:0031122	33	-0.251965	-0.998176	0.480122	1	1	675
1096	KERATINIZATION%REACTOME%R-HSA-6805567.2	77	-0.227076	-0.998094	0.457394	1	1	1880
1097	ESTABLISHMENT OR MAINTENANCE OF BIPOLAR CELL POLARITY%GOBP%GO:0061245	24		-0.997087	0.453718	1	1	1653
1098	LIPOPROTEIN BIOSYNTHETIC PROCESS%GOBP%GO:0042158	22		-0.996627	0.480892	1	1	526
1099	RESPONSE TO STEROID HORMONE%GOBP%GO:0048545	41		-0.996356	0.478693	1	1	1449
1100	HS-GAG BIOSYNTHESIS%REACTOME%R-HSA-2022928.1	20		-0.996334	0.475309	1	1	1298
1101	VENTRICULAR CARDIAC MUSCLE TISSUE DEVELOPMENT%GOBP%GO:0003229	19		-0.995539	0.478125	1	1	880
1102	SYNTHESIS OF SUBSTRATES IN N-GLYCAN BIOSYTHESIS%REACTOME DATABASE ID RELEASE 75%446219	31		-0.994671	0.480463	1	1	485
1103	PHOSPHOLIPID METABOLIC PROCESS%GOBP%GO:0006644	150		-0.994351	0.486936	1	1	1586
1104	MELANOSOME ORGANIZATION%GOBP%GO:0032438	15		-0.994303	0.472441	1	1	432
1105	CELLULAR RESPONSE TO DRUG%GOBP%GO:0035690	88		-0.994108	0.459596	1	1	1494
1106	REGULATION OF HORMONE SECRETION%GOBP%GO:0046883	61		-0.993801	0.473826	1	1	1463
1107	ESTABLISHMENT OR MAINTENANCE OF APICAL/BASAL CELL POLARITY%GOBP%GO:0035088	24		-0.99332	0.485086	1	1	1653
1108	REGULATION OF CHEMOTAXIS%GOBP%GO:0050920	105		-0.993223	0.467089	1	1	945
1109	RHO GTPASES ACTIVATE WASPS AND WAVES%REACTOME DATABASE ID RELEASE 75%5663213	30		-0.993054	0.47976	1	1	905
1110	NUCLEOBASE-CONTAINING SMALL MOLECULE INTERCONVERSION%GOBP%GO:0015949	20		-0.993046	0.480122	1	1	1475
1111	REGULATION OF BLOOD PRESSURE%GOBP%GO:0008217	50		-0.992852	0.478814	1	1	888
1112	THERMOGENESIS%WIKIPATHWAYS_20210210%WP4321%HOMO SAPIENS	54		-0.992847	0.47962	1	1	784
1113	REGULATION OF NEUROTRANSMITTER RECEPTOR ACTIVITY%GOBP%GO:0099601	22		-0.992687	0.483568	1	1	760
1114	NEGATIVE REGULATION OF PROTEASOMAL PROTEIN CATABOLIC PROCESS%GOBP%GO:1901799	29		-0.992181	0.471037	1	1	481
1115	RNA MODIFICATION%GOBP%GO:0009451	61		-0.991188	0.488	1	1	1252
1116	PURINE RIBONUCLEOSIDE METABOLIC PROCESS%GOBP%GO:0046128	29		-0.991142	0.465857	1	1	1461
1117	VENTRICULAR CARDIAC MUSCLE TISSUE MORPHOGENESIS%GOBP%GO:0055010	18		-0.9909	0.489362	1	1	880
1118	MULTICELLULAR ORGANISMAL REPRODUCTIVE PROCESS%GOBP%GO:0048609	97		-0.990172	0.495049	1	1	901
1119	KERATINIZATION%GOBP%GO:0031424	78		-0.989121	0.486129	1	1	1880
1120	PHOSPHATIDYLCHOLINE METABOLIC PROCESS%GOBP%GO:0046470	31		-0.988876	0.484627	1	1	1571
1121	POSITIVE REGULATION OF LIPID METABOLIC PROCESS%GOBP%GO:0045834	46		-0.98884	0.477716	1	1	1494
1122	SYNDECAN-1-MEDIATED SIGNALING EVENTS%PATHWAY INTERACTION DATABASE NCI-NATURE CURATED DATA%SYNDECAN-1-MEDIATED SIGNALING EVENTS	34		-0.988556	0.477239	1	1	684
1123	HEXOSE METABOLIC PROCESS%GOBP%GO:0019318	67		-0.98786	0.4753	1	1	1946
1124	TRANSCRIPTION BY RNA POLYMERASE I%GOBP%GO:0006360	17		-0.987115	0.471698	1	1	1382
1125	FGFR2 MUTANT RECEPTOR ACTIVATION%REACTOME%R-HSA-1839126.2	16		-0.987068	0.48576	1	1	1364
1126	POSITIVE REGULATION OF CELL DEATH%GOBP%GO:0010942	233		-0.986881	0.508324	1	1	1010
1127	REGULATION OF NITRIC OXIDE BIOSYNTHETIC PROCESS%GOBP%GO:0045428	22		-0.986742	0.473282	1	1	173
1128	TRNA MODIFICATION IN THE NUCLEUS AND CYTOSOL%REACTOME DATABASE ID RELEASE 75%6782315	21		-0.984573	0.473354	1	1	1252
1129	PEPTIDE CHAIN ELONGATION%REACTOME%R-HSA-156902.2	85		-0.983804	0.506971	1	1	584
1130	NEGATIVE REGULATION OF PEPTIDASE ACTIVITY%GOBP%GO:0010466	89		-0.983152	0.508431	1	1	1023
1131	CLATHRIN-DEPENDENT ENDOCYTOSIS%GOBP%GO:0072583	19		-0.982807	0.472952	1	1	685
1132	POSITIVE REGULATION OF PHOSPHORUS METABOLIC PROCESS%GOBP%GO:0010562	404		-0.982476	0.524659	1	1	787
1133	REGULATION OF NEUROTRANSMITTER LEVELS%GOBP%GO:0001505	121		-0.982231	0.494479	1	1	1534
1134	POSITIVE REGULATION OF NUCLEOBASE-CONTAINING COMPOUND METABOLIC PROCESS%GOBP%GO:0045935	481		-0.982176	0.552686	1	1	754
1135	INTERNAL PROTEIN AMINO ACID ACETYLATION%GOBP%GO:0006475	21		-0.981611	0.492823	1	1	679
1136	NEGATIVE REGULATION OF MITOCHONDRION ORGANIZATION%GOBP%GO:0010823	20		-0.981479	0.489567	1	1	1402
1137	REGULATION OF LEUKOCYTE MEDIATED IMMUNITY%GOBP%GO:0002703	69		-0.98058	0.509383	1	1	1596
1138	CELL JUNCTION ORGANIZATION%REACTOME%R-HSA-446728.2	57		-0.980462	0.487637	1	1	757
1139	RESPONSE TO PURINE-CONTAINING COMPOUND%GOBP%GO:0014074	22		-0.980271	0.471609	1	1	1413
1140	NEGATIVE REGULATION OF TRANSCRIPTION BY RNA POLYMERASE II%GOBP%GO:0000122	166		-0.980249	0.505869	1	1	928
1141	REGULATION OF RELEASE OF CYTOCHROME C FROM MITOCHONDRIA%GOBP%GO:0090199	21		-0.980066	0.466267	1	1	1402
1142	REGULATION OF SYNAPSE STRUCTURE OR ACTIVITY%GOBP%GO:0050803	60		-0.979492	0.499341	1	1	1244
1143	POSITIVE REGULATION OF PHOSPHATE METABOLIC PROCESS%GOBP%GO:0045937	404		-0.978993	0.528557	1	1	787
1144	REGULATION OF INTERLEUKIN-2 PRODUCTION%GOBP%GO:0032663	18		-0.978538	0.494309	1	1	1016
1145	GLUCAGON SIGNALING IN METABOLIC REGULATION%REACTOME DATABASE ID RELEASE 75%163359	20		-0.977864	0.47956	1	1	1464
1146	POSITIVE REGULATION OF RNA METABOLIC PROCESS%GOBP%GO:0051254	406		-0.97762	0.535975	1	1	754
1147	AMINE METABOLIC PROCESS%GOBP%GO:0009308	25		-0.977571	0.495522	1	1	997
1148	HALLMARK_IL2_STAT5_SIGNALING%MSIGDB_C2%HALLMARK_IL2_STAT5_SIGNALING	90		-0.976288	0.496823	1	1	961
1149	EUKARYOTIC TRANSLATION ELONGATION%REACTOME%R-HSA-156842.2	89		-0.975689	0.506394	1	1	584
1150	SPERMATOGENESIS%GOBP%GO:0007283	66		-0.975563	0.525126	1	1	482
1151	BICARBONATE TRANSPORT%GOBP%GO:0015701	18		-0.975183	0.503888	1	1	1209
1152	MYOMETRIAL RELAXATION AND CONTRACTION PATHWAYS%WIKIPATHWAYS_20210210%WP289%HOMO SAPIENS	78		-0.975071	0.510582	1	1	1730
1153	MORPHOGENESIS OF A BRANCHING STRUCTURE%GOBP%GO:0001763	25		-0.97502	0.497076	1	1	1393
1154	MONOSACCHARIDE METABOLIC PROCESS%GOBP%GO:0005996	84		-0.974871	0.539355	1	1	1946
1155	GLYCOLYTIC PROCESS%GOBP%GO:0006096	28		-0.974651	0.483309	1	1	1850
1156	RESPONSE TO ORGANIC CYCLIC COMPOUND%GOBP%GO:0014070	138		-0.974513	0.51963	1	1	1449
1157	ERYTHROCYTE DIFFERENTIATION%GOBP%GO:0030218	23		-0.974258	0.492424	1	1	945
1158	REGULATION OF CIRCADIAN RHYTHM%GOBP%GO:0042752	35		-0.974022	0.508029	1	1	558
1159	ARACHIDONIC ACID METABOLISM%REACTOME%R-HSA-2142753.5	32		-0.973975	0.487106	1	1	1442
1160	EMBRYONIC MORPHOGENESIS%GOBP%GO:0048598	106		-0.973661	0.50918	1	1	682
1161	POTASSIUM ION TRANSMEMBRANE TRANSPORT%GOBP%GO:0071805	28		-0.973327	0.500736	1	1	1659
1162	COMMON PATHWAY OF FIBRIN CLOT FORMATION%REACTOME%R-HSA-140875.4	21		-0.973309	0.500766	1	1	1806
1163	DNA DUPLEX UNWINDING%GOBP%GO:0032508	29		-0.9725	0.491994	1	1	720
1164	REGULATION OF INTERLEUKIN-1 PRODUCTION%GOBP%GO:0032652	34		-0.972479	0.487555	1	1	1808
1165	SIGNALING BY GPCR%REACTOME DATABASE ID RELEASE 75%372790	202		-0.972376	0.532511	1	1	1472
1166	IRE1-MEDIATED UNFOLDED PROTEIN RESPONSE%GOBP%GO:0036498	30		-0.972063	0.5	1	1	2302
1167	POSITIVE REGULATION OF MONONUCLEAR CELL PROLIFERATION%GOBP%GO:0032946	47		-0.971712	0.50211	1	1	1671
1168	REGULATION OF CYTOKINE PRODUCTION%GOBP%GO:0001817	269		-0.97127	0.555315	1	1	1712
1169	INTERCONVERSION OF NUCLEOTIDE DI- AND TRIPHOSPHATES%REACTOME DATABASE ID RELEASE 75%499943	20		-0.970478	0.481717	1	1	1475
1170	REGULATION OF ION TRANSMEMBRANE TRANSPORT%GOBP%GO:0034765	117		-0.970019	0.547703	1	1	800
1171	EPH-EPHRIN SIGNALING%REACTOME DATABASE ID RELEASE 75%2682334	71		-0.969746	0.499334	1	1	955
1172	RESPONSE TO RADIATION%GOBP%GO:0009314	110		-0.969445	0.557457	1	1	792
1173	NEPHRON DEVELOPMENT%GOBP%GO:0072006	37		-0.96925	0.524229	1	1	877
1174	CYTOSKELETON-DEPENDENT INTRACELLULAR TRANSPORT%GOBP%GO:0030705	94		-0.969132	0.517632	1	1	1458
1175	SODIUM ION TRANSMEMBRANE TRANSPORT%GOBP%GO:0035725	30		-0.967972	0.494905	1	1	1052
1176	BEHAVIOR%GOBP%GO:0007610	63		-0.967785	0.532	1	1	988
1177	TAXIS%GOBP%GO:0042330	203		-0.967738	0.554311	1	1	1454
1178	PARKINSON DISEASE%PANTHER PATHWAY%P00049	64		-0.967254	0.531459	1	1	947
1179	DNA IR-DAMAGE AND CELLULAR RESPONSE VIA ATR%WIKIPATHWAYS_20210210%WP4016%HOMO SAPIENS	37		-0.967212	0.507463	1	1	667
1180	INFLUENZA INFECTION%REACTOME DATABASE ID RELEASE 75%168255	140		-0.967165	0.523474	1	1	685
1181	POSITIVE REGULATION OF INTERLEUKIN-1 PRODUCTION%GOBP%GO:0032732	23		-0.967115	0.517804	1	1	1808
1182	RESPONSE TO HYPOXIA%GOBP%GO:0001666	115		-0.966813	0.52963	1	1	979
1183	KERATINOCYTE DIFFERENTIATION%GOBP%GO:0030216	92		-0.966576	0.511222	1	1	976
1184	EPITHELIUM DEVELOPMENT%GOBP%GO:0060429	304		-0.966509	0.562366	1	1	1037
1185	NUCLEOSIDE PHOSPHATE CATABOLIC PROCESS%GOBP%GO:1901292	60		-0.966375	0.523057	1	1	1850
1186	GUANOSINE-CONTAINING COMPOUND METABOLIC PROCESS%GOBP%GO:1901068	19		-0.965646	0.521944	1	1	1461
1187	REGULATION OF ION TRANSPORT%GOBP%GO:0043269	178		-0.965495	0.555556	1	1	892
1188	AMINO ACID IMPORT%GOBP%GO:0043090	19		-0.964738	0.522205	1	1	9
1189	CARDIAC MUSCLE TISSUE MORPHOGENESIS%GOBP%GO:0055008	20		-0.96388	0.523365	1	1	880
1190	REGIONALIZATION%GOBP%GO:0003002	32		-0.963092	0.516517	1	1	624
1191	INTEGRINS IN ANGIOGENESIS%PATHWAY INTERACTION DATABASE NCI-NATURE CURATED DATA%INTEGRINS IN ANGIOGENESIS	57		-0.962815	0.524138	1	1	787
1192	NICOTINAMIDE NUCLEOTIDE METABOLIC PROCESS%GOBP%GO:0046496	71		-0.962593	0.543478	1	1	1894
1193	REGULATION OF CELL ADHESION MEDIATED BY INTEGRIN%GOBP%GO:0033628	28		-0.962484	0.515151	1	1	962
1194	CHEMOTAXIS%GOBP%GO:0006935	203		-0.962138	0.572072	1	1	1454
1195	PROTEIN-LIPID COMPLEX REMODELING%GOBP%GO:0034368	21		-0.962088	0.49922	1	1	1688
1196	CELL JUNCTION ORGANIZATION%GOBP%GO:0034330	124		-0.961537	0.545117	1	1	761
1197	PEPTIDYL-AMINO ACID MODIFICATION%GOBP%GO:0018193	301		-0.96151	0.575532	1	1	1431
1198	NUCLEOTIDE METABOLISM%REACTOME DATABASE ID RELEASE 75%15869	64		-0.959136	0.524439	1	1	1475
1199	NAD METABOLIC PROCESS%GOBP%GO:0019674	46		-0.958841	0.531735	1	1	1850
1200	RECEPTOR INTERNALIZATION%GOBP%GO:0031623	31		-0.958551	0.533626	1	1	1454
1201	RESPONSE TO DECREASED OXYGEN LEVELS%GOBP%GO:0036293	115		-0.957935	0.571084	1	1	979
1202	HYDROGEN PEROXIDE CATABOLIC PROCESS%GOBP%GO:0042744	18		-0.957394	0.514516	1	1	1673
1203	MUSCLE STRUCTURE DEVELOPMENT%GOBP%GO:0061061	102		-0.957312	0.546239	1	1	881
1204	POSITIVE REGULATION OF POSTTRANSCRIPTIONAL GENE SILENCING%GOBP%GO:0060148	19		-0.957126	0.505477	1	1	638
1205	METABOLISM OF VITAMINS AND COFACTORS%REACTOME%R-HSA-196854.6	119		-0.957	0.54491	1	1	1697
1206	CELLULAR MODIFIED AMINO ACID METABOLIC PROCESS%GOBP%GO:0006575	96		-0.956876	0.543928	1	1	1676
1207	ARACHIDONIC ACID METABOLIC PROCESS%GOBP%GO:0019369	21		-0.956572	0.505865	1	1	1092
1208	REGULATION OF SYNAPSE ORGANIZATION%GOBP%GO:0050807	54		-0.956478	0.534045	1	1	954
1209	ACTIN FILAMENT-BASED PROCESS%GOBP%GO:0030029	283		-0.956022	0.592998	1	1	891
1210	TRNA AMINOACYLATION%GOBP%GO:0043039	33		-0.955951	0.504478	1	1	359
1211	CARBOXYTERMINAL POST-TRANSLATIONAL MODIFICATIONS OF TUBULIN%REACTOME%R-HSA-8955332.1	15		-0.95571	0.543689	1	1	826
1212	NEGATIVE REGULATION OF TRANSMEMBRANE TRANSPORT%GOBP%GO:0034763	45		-0.955397	0.549215	1	1	800
1213	RESPONSE OF EIF2AK4 (GCN2) TO AMINO ACID DEFICIENCY%REACTOME DATABASE ID RELEASE 75%9633012	88		-0.955291	0.557419	1	1	584
1214	ATP GENERATION FROM ADP%GOBP%GO:0006757	28		-0.955123	0.513314	1	1	1850
1215	BDNF-TRKB SIGNALING%WIKIPATHWAYS_20210210%WP3676%HOMO SAPIENS	16		-0.954908	0.53905	1	1	634
1216	MALE GAMETE GENERATION%GOBP%GO:0048232	67		-0.954873	0.538755	1	1	482
1217	NEUROTRANSMITTER RELEASE CYCLE%REACTOME%R-HSA-112310.5	26		-0.954414	0.521805	1	1	1713
1218	GENERIC TRANSCRIPTION PATHWAY%REACTOME%R-HSA-212436.11	393		-0.954128	0.609524	1	1	711
1219	SELENOCYSTEINE SYNTHESIS%REACTOME DATABASE ID RELEASE 75%2408557	87		-0.954088	0.52986	1	1	584
1220	MICROTUBULE POLYMERIZATION OR DEPOLYMERIZATION%GOBP%GO:0031109	28		-0.953764	0.52346	1	1	293
1221	LEARNING OR MEMORY%GOBP%GO:0007611	40		-0.953655	0.537065	1	1	652
1222	RIBONUCLEOSIDE METABOLIC PROCESS%GOBP%GO:0009119	35		-0.953306	0.547009	1	1	1461
1223	PLASMA LIPOPROTEIN PARTICLE REMODELING%GOBP%GO:0034369	21		-0.952498	0.545736	1	1	1688
1224	REGULATION OF PEPTIDASE ACTIVITY%GOBP%GO:0052547	175		-0.951713	0.575058	1	1	1023
1225	RESPONSE TO ACID CHEMICAL%GOBP%GO:0001101	63		-0.951566	0.558077	1	1	1660
1226	POLYOL METABOLIC PROCESS%GOBP%GO:0019751	50		-0.951444	0.52514	1	1	1578
1227	POSITIVE REGULATION OF TELOMERE MAINTENANCE VIA TELOMERE LENGTHENING%GOBP%GO:1904358	20		-0.951126	0.53096	1	1	465
1228	REGULATION OF GLYCOPROTEIN METABOLIC PROCESS%GOBP%GO:1903018	19		-0.951116	0.51424	1	1	1402
1229	REGULATION OF INTERLEUKIN-12 PRODUCTION%GOBP%GO:0032655	15		-0.950687	0.513017	1	1	910
1230	POSITIVE REGULATION OF TUMOR NECROSIS FACTOR PRODUCTION%GOBP%GO:0032760	37		-0.950661	0.54451	1	1	1016
1231	BIOSYNTHESIS OF THE N-GLYCAN PRECURSOR (DOLICHOL LIPID-LINKED OLIGOSACCHARIDE, LLO) AND TRANSFER TO A NASCENT PROTEIN%REACTOME%R-HSA-446193.1	33		-0.950624	0.53461	1	1	794
1232	RNA POLYMERASE I TRANSCRIPTION TERMINATION%REACTOME%R-HSA-73863.4	15		-0.950589	0.536789	1	1	1382
1233	AMINO ACID ACTIVATION%GOBP%GO:0043038	33		-0.950448	0.514409	1	1	359
1234	ADP METABOLIC PROCESS%GOBP%GO:0046031	28		-0.949178	0.534743	1	1	1850
1235	PYRIDINE NUCLEOTIDE METABOLIC PROCESS%GOBP%GO:0019362	71		-0.948818	0.568807	1	1	1894
1236	POSITIVE REGULATION OF GENE SILENCING BY MIRNA%GOBP%GO:2000637	18		-0.948354	0.542902	1	1	638
1237	POSITIVE REGULATION OF CELL DIFFERENTIATION%GOBP%GO:0045597	306		-0.948329	0.623913	1	1	1010
1238	TRNA AMINOACYLATION%REACTOME DATABASE ID RELEASE 75%379724	33		-0.948089	0.544818	1	1	359
1239	DISEASES OF CARBOHYDRATE METABOLISM%REACTOME%R-HSA-5663084.3	24		-0.947676	0.531783	1	1	1453
1240	SPINAL CORD INJURY%WIKIPATHWAYS_20210210%WP2431%HOMO SAPIENS	57		-0.947334	0.55799	1	1	873
1241	NEGATIVE REGULATION OF CALCIUM ION TRANSPORT%GOBP%GO:0051926	19		-0.946256	0.525285	1	1	988
1242	MUSCLE TISSUE MORPHOGENESIS%GOBP%GO:0060415	22		-0.946226	0.529323	1	1	880
1243	ENDODERM DEVELOPMENT%GOBP%GO:0007492	29		-0.946211	0.524567	1	1	682
1244	CELLULAR BIOGENIC AMINE METABOLIC PROCESS%GOBP%GO:0006576	21		-0.946032	0.535771	1	1	997
1245	SEMAPHORIN INTERACTIONS%REACTOME DATABASE ID RELEASE 75%373755	49		-0.945599	0.541374	1	1	1157
1246	REGULATION OF NIK/NF-KAPPAB SIGNALING%GOBP%GO:1901222	40		-0.945448	0.5671	1	1	675
1247	PURINE RIBONUCLEOSIDE DIPHOSPHATE METABOLIC PROCESS%GOBP%GO:0009179	29		-0.944721	0.548817	1	1	1850
1248	TRANSCRIPTIONAL REGULATION BY MECP2%REACTOME%R-HSA-8986944.2	23		-0.944546	0.550702	1	1	624
1249	NCAM SIGNALING FOR NEURITE OUT-GROWTH%REACTOME DATABASE ID RELEASE 75%375165	34		-0.944539	0.54294	1	1	1059
1250	PID_AURORA_B_PATHWAY%MSIGDB_C2%PID_AURORA_B_PATHWAY	25		-0.944427	0.543675	1	1	162
1251	TRNA AMINOACYLATION FOR PROTEIN TRANSLATION%GOBP%GO:0006418	33		-0.944393	0.536622	1	1	359
1252	CELLULAR RESPONSE TO RADIATION%GOBP%GO:0071478	62		-0.943898	0.558389	1	1	679
1253	POSITIVE REGULATION OF LEUKOCYTE PROLIFERATION%GOBP%GO:0070665	52		-0.943771	0.560709	1	1	1671
1254	CELLULAR AMINE METABOLIC PROCESS%GOBP%GO:0044106	21		-0.943626	0.563183	1	1	997
1255	ENZYME LINKED RECEPTOR PROTEIN SIGNALING PATHWAY%GOBP%GO:0007167	328		-0.9436	0.637158	1	1	1469
1256	RESPONSE TO CAMP%GOBP%GO:0051591	15		-0.943477	0.549383	1	1	1659
1257	GENERATION OF SECOND MESSENGER MOLECULES%REACTOME DATABASE ID RELEASE 75%202433	21		-0.943348	0.540373	1	1	1812
1258	MUSCLE ORGAN MORPHOGENESIS%GOBP%GO:0048644	22		-0.943179	0.518018	1	1	880
1259	ACTIVATION OF BH3-ONLY PROTEINS%REACTOME DATABASE ID RELEASE 75%114452	16		-0.943097	0.536349	1	1	594
1260	SEXUAL REPRODUCTION%GOBP%GO:0019953	112		-0.942555	0.582071	1	1	901
1261	REGULATION OF TELOMERE MAINTENANCE VIA TELOMERASE%GOBP%GO:0032210	23		-0.94245	0.532625	1	1	465
1262	NEGATIVE REGULATION OF DEFENSE RESPONSE%GOBP%GO:0031348	114		-0.942214	0.571602	1	1	1016
1263	REGULATION OF LIPID TRANSPORT%GOBP%GO:0032368	49		-0.942039	0.543651	1	1	1090
1264	POSITIVE REGULATION OF TUMOR NECROSIS FACTOR SUPERFAMILY CYTOKINE PRODUCTION%GOBP%GO:1903557	38		-0.941938	0.559712	1	1	1016
1265	MOLECULES ASSOCIATED WITH ELASTIC FIBRES%REACTOME DATABASE ID RELEASE 75%2129379	22		-0.941741	0.554348	1	1	1802
1266	XBP1(S) ACTIVATES CHAPERONE GENES%REACTOME DATABASE ID RELEASE 75%381038	28		-0.94112	0.555031	1	1	2302
1267	MESODERMAL COMMITMENT PATHWAY%WIKIPATHWAYS_20210210%WP2857%HOMO SAPIENS	45		-0.941065	0.566667	1	1	1538
1268	PID_S1P_S1P1_PATHWAY%MSIGDB_C2%PID_S1P_S1P1_PATHWAY	18		-0.94061	0.56025	1	1	603
1269	ABC-FAMILY PROTEINS MEDIATED TRANSPORT%REACTOME%R-HSA-382556.4	71		-0.940445	0.566887	1	1	875
1270	CANONICAL WNT SIGNALING PATHWAY%GOBP%GO:0060070	18		-0.940286	0.547049	1	1	1393
1271	EPITHELIAL CELL DIFFERENTIATION%GOBP%GO:0030855	224		-0.939705	0.59846	1	1	1037
1272	PROTEIN-CONTAINING COMPLEX REMODELING%GOBP%GO:0034367	22		-0.939697	0.552167	1	1	1688
1273	APICAL JUNCTION ASSEMBLY%GOBP%GO:0043297	33		-0.938876	0.562319	1	1	761
1274	RNA POLYMERASE II TRANSCRIBES SNRNA GENES%REACTOME%R-HSA-6807505.2	32		-0.938354	0.555072	1	1	690
1275	REGULATION OF PROTEIN TARGETING TO MEMBRANE%GOBP%GO:0090313	18		-0.937177	0.56135	1	1	159
1276	RESPONSE TO OXYGEN LEVELS%GOBP%GO:0070482	122		-0.937155	0.614824	1	1	979
1277	DETERMINATION OF BILATERAL SYMMETRY%GOBP%GO:0009855	16		-0.935729	0.543131	1	1	624
1278	IRE1ALPHA ACTIVATES CHAPERONES%REACTOME%R-HSA-381070.1	29		-0.935357	0.570579	1	1	2302
1279	NEGATIVE REGULATION OF NERVOUS SYSTEM DEVELOPMENT%GOBP%GO:0051961	79		-0.935027	0.585987	1	1	1647
1280	SPINDLE ASSEMBLY%GOBP%GO:0051225	38		-0.934406	0.563953	1	1	533
1281	POSITIVE REGULATION OF INTERLEUKIN-6 PRODUCTION%GOBP%GO:0032755	25		-0.934242	0.534226	1	1	1675
1282	POSITIVE REGULATION OF CALCIUM ION TRANSPORT%GOBP%GO:0051928	30		-0.934202	0.589587	1	1	892
1283	POSITIVE REGULATION OF PHOSPHATIDYLINOSITOL 3-KINASE SIGNALING%GOBP%GO:0014068	38		-0.934195	0.579025	1	1	1409
1284	P53 PATHWAY FEEDBACK LOOPS 2%PANTHER PATHWAY%P04398	19		-0.933993	0.531056	1	1	634
1285	SARS-COV-2 MITOCHONDRIAL INTERACTIONS%WIKIPATHWAYS_20210210%WP5038%HOMO SAPIENS	17		-0.933102	0.571885	1	1	1933
1286	RNA METHYLATION%GOBP%GO:0001510	27		-0.932644	0.564706	1	1	621
1287	CELL ADHESION MEDIATED BY INTEGRIN%GOBP%GO:0033627	21		-0.93203	0.546423	1	1	128
1288	HETEROTRIMERIC G-PROTEIN SIGNALING PATHWAY-GQ ALPHA AND GO ALPHA MEDIATED PATHWAY%PANTHER PATHWAY%P00027	41		-0.931718	0.576758	1	1	1145
1289	CELLULAR RESPONSE TO TOPOLOGICALLY INCORRECT PROTEIN%GOBP%GO:0035967	67		-0.93167	0.604439	1	1	1784
1290	REGULATION OF STRIATED MUSCLE TISSUE DEVELOPMENT%GOBP%GO:0016202	28		-0.931546	0.577039	1	1	666
1291	METAL ION TRANSPORT%GOBP%GO:0030001	145		-0.931477	0.605295	1	1	1081
1292	COLLAGEN FIBRIL ORGANIZATION%GOBP%GO:0030199	64		-0.931344	0.578378	1	1	684
1293	MODIFICATION BY HOST OF SYMBIONT MORPHOLOGY OR PHYSIOLOGY%GOBP%GO:0051851	43		-0.93107	0.603175	1	1	1123
1294	DEFECTIVE B4GALT7 CAUSES EDS, PROGEROID TYPE%REACTOME%R-HSA-3560783.1	19		-0.931003	0.539413	1	1	665
1295	CELL-CELL JUNCTION ORGANIZATION%GOBP%GO:0045216	72		-0.930868	0.597132	1	1	761
1296	FC RECEPTOR MEDIATED STIMULATORY SIGNALING PATHWAY%GOBP%GO:0002431	56		-0.930619	0.573333	1	1	974
1297	REGULATION OF CALCIUM ION TRANSPORT%GOBP%GO:0051924	63		-0.9306	0.576177	1	1	988
1298	RESPONSE TO LIPOPOLYSACCHARIDE%GOBP%GO:0032496	76		-0.930215	0.571429	1	1	999
1299	STEM CELL POPULATION MAINTENANCE%GOBP%GO:0019827	25		-0.930135	0.570783	1	1	666
1300	VIRAL MRNA TRANSLATION%REACTOME%R-HSA-192823.4	85		-0.929918	0.603316	1	1	584
1301	POSITIVE REGULATION OF PHOSPHORYLATION%GOBP%GO:0042327	379		-0.929864	0.681535	1	1	1494
1302	PIGMENT METABOLIC PROCESS%GOBP%GO:0042440	32		-0.929774	0.577364	1	1	1924
1303	CELLULAR RESPONSE TO STEROID HORMONE STIMULUS%GOBP%GO:0071383	32		-0.929283	0.58477	1	1	1449
1304	RHO PROTEIN SIGNAL TRANSDUCTION%GOBP%GO:0007266	31		-0.92914	0.577444	1	1	1456
1305	PID_P75_NTR_PATHWAY%MSIGDB_C2%PID_P75_NTR_PATHWAY	38		-0.928679	0.574468	1	1	966
1306	SPECIFICATION OF SYMMETRY%GOBP%GO:0009799	16		-0.928496	0.558678	1	1	624
1307	MITOTIC DNA DAMAGE CHECKPOINT%GOBP%GO:0044773	34		-0.928425	0.572857	1	1	698
1308	NEURON MIGRATION%GOBP%GO:0001764	23		-0.92824	0.558519	1	1	784
1309	VITAMIN METABOLIC PROCESS%GOBP%GO:0006766	63		-0.928204	0.578674	1	1	1697
1310	POSITIVE REGULATION OF PROTEIN PHOSPHORYLATION%GOBP%GO:0001934	342		-0.927647	0.689765	1	1	787
1311	PYRIDINE-CONTAINING COMPOUND METABOLIC PROCESS%GOBP%GO:0072524	79		-0.92732	0.603871	1	1	1894
1312	PID_BMP_PATHWAY%MSIGDB_C2%PID_BMP_PATHWAY	19		-0.927128	0.576271	1	1	709
1313	SYNAPTIC VESICLE ENDOCYTOSIS%GOBP%GO:0048488	23		-0.926927	0.564142	1	1	1348
1314	BMP RECEPTOR SIGNALING%PATHWAY INTERACTION DATABASE NCI-NATURE CURATED DATA%BMP RECEPTOR SIGNALING	19		-0.926194	0.574074	1	1	709
1315	G-PROTEIN BETA:GAMMA SIGNALLING%REACTOME DATABASE ID RELEASE 75%397795	20		-0.926085	0.571212	1	1	905
1316	CELL-CELL COMMUNICATION%REACTOME%R-HSA-1500931.4	80		-0.925929	0.597452	1	1	760
1317	BRAIN DEVELOPMENT%GOBP%GO:0007420	146		-0.925692	0.643931	1	1	1585
1318	NEGATIVE REGULATION OF ION TRANSPORT%GOBP%GO:0043271	52		-0.925691	0.582754	1	1	800
1319	SIGNALING BY HEDGEHOG%REACTOME DATABASE ID RELEASE 75%5358351	88		-0.924799	0.597701	1	1	951
1320	ERYTHROCYTE HOMEOSTASIS%GOBP%GO:0034101	26		-0.924673	0.583975	1	1	945
1321	PEPTIDYL-LYSINE MODIFICATION%GOBP%GO:0018205	90		-0.924447	0.624359	1	1	494
1322	REGULATION OF ENDOPEPTIDASE ACTIVITY%GOBP%GO:0052548	162		-0.924215	0.657551	1	1	1023
1323	POSITIVE REGULATION OF SUBSTRATE ADHESION-DEPENDENT CELL SPREADING%GOBP%GO:1900026	30		-0.923867	0.576751	1	1	358
1324	RHO GTPASE CYCLE%REACTOME%R-HSA-194840.5	59		-0.923819	0.604683	1	1	520
1325	DETOXIFICATION OF REACTIVE OXYGEN SPECIES%REACTOME%R-HSA-3299685.5	24		-0.923496	0.575581	1	1	1788
1326	REGULATION OF TELOMERASE%PATHWAY INTERACTION DATABASE NCI-NATURE CURATED DATA%REGULATION OF TELOMERASE	34		-0.922479	0.556213	1	1	661
1327	MAINTENANCE OF CELL NUMBER%GOBP%GO:0098727	26		-0.921594	0.576507	1	1	1431
1328	EMBRYO DEVELOPMENT%GOBP%GO:0009790	149		-0.921423	0.6609	1	1	682
1329	PID_CD8_TCR_PATHWAY%MSIGDB_C2%PID_CD8_TCR_PATHWAY	34		-0.921407	0.583082	1	1	1016
1330	TYPE I COLLAGEN SYNTHESIS IN THE CONTEXT OF OSTEOGENESIS IMPERFECTA%WIKIPATHWAYS_20210210%WP4786%HOMO SAPIENS	22		-0.921336	0.584733	1	1	1867
1331	DNA REPAIR%GOBP%GO:0006281	174		-0.921058	0.650057	1	1	851
1332	PYRIMIDINE-CONTAINING COMPOUND METABOLIC PROCESS%GOBP%GO:0072527	33		-0.920953	0.572662	1	1	1920
1333	MACROMOLECULE DEACYLATION%GOBP%GO:0098732	25		-0.920816	0.589205	1	1	593
1334	RESPONSE TO ABIOTIC STIMULUS%GOBP%GO:0009628	327		-0.920743	0.695238	1	1	1023
1335	REGULATION OF MEGAKARYOCYTE DIFFERENTIATION%GOBP%GO:0045652	30		-0.920637	0.590361	1	1	1011
1336	REGULATION OF MUSCLE ORGAN DEVELOPMENT%GOBP%GO:0048634	28		-0.920401	0.591118	1	1	666
1337	RESPONSE TO BIOTIC STIMULUS%GOBP%GO:0009607	277		-0.920175	0.686551	1	1	1027
1338	REGULATION OF DNA RECOMBINATION%GOBP%GO:0000018	53		-0.920111	0.6	1	1	751
1339	P75(NTR)-MEDIATED SIGNALING%PATHWAY INTERACTION DATABASE NCI-NATURE CURATED DATA%P75(NTR)-MEDIATED SIGNALING	38		-0.919494	0.602583	1	1	966
1340	PROTEIN INSERTION INTO ER MEMBRANE%GOBP%GO:0045048	22		-0.919105	0.586154	1	1	1689
1341	RESPONSE TO ENDOGENOUS STIMULUS%GOBP%GO:0009719	415		-0.919044	0.718426	1	1	800
1342	PRESYNAPTIC ENDOCYTOSIS%GOBP%GO:0140238	23		-0.918908	0.580694	1	1	1348
1343	SEMA4D IN SEMAPHORIN SIGNALING%REACTOME%R-HSA-400685.2	20		-0.918907	0.580247	1	1	752
1344	HALLMARK_MYOGENESIS%MSIGDB_C2%HALLMARK_MYOGENESIS	111		-0.918712	0.65099	1	1	891
1345	HALLMARK_MTORC1_SIGNALING%MSIGDB_C2%HALLMARK_MTORC1_SIGNALING	150		-0.918419	0.666667	1	1	1867
1346	PID_TELOMERASE_PATHWAY%MSIGDB_C2%PID_TELOMERASE_PATHWAY	34		-0.918359	0.590909	1	1	661
1347	NEGATIVE REGULATION OF HYDROLASE ACTIVITY%GOBP%GO:0051346	151		-0.918228	0.658824	1	1	863
1348	UNSATURATED FATTY ACID BIOSYNTHETIC PROCESS%GOBP%GO:0006636	23		-0.918109	0.58371	1	1	1354
1349	EPIDERMAL CELL DIFFERENTIATION%GOBP%GO:0009913	101		-0.917777	0.633085	1	1	976
1350	PATTERN RECOGNITION RECEPTOR SIGNALING PATHWAY%GOBP%GO:0002221	66		-0.917604	0.612058	1	1	556
1351	REGULATION OF BLOOD VESSEL DIAMETER%GOBP%GO:0097746	27		-0.91718	0.603945	1	1	1567
1352	MEIOSIS I%GOBP%GO:0007127	16		-0.91701	0.572785	1	1	667
1353	PID_MAPK_TRK_PATHWAY%MSIGDB_C2%PID_MAPK_TRK_PATHWAY	18		-0.916844	0.558779	1	1	978
1354	POSITIVE REGULATION OF LIPID TRANSPORT%GOBP%GO:0032370	28		-0.916612	0.578947	1	1	126
1355	TUBE DEVELOPMENT%GOBP%GO:0035295	181		-0.916301	0.664713	1	1	1469
1356	POSITIVE REGULATION OF INTERLEUKIN-1 BETA PRODUCTION%GOBP%GO:0032731	18		-0.91616	0.559091	1	1	1808
1357	MICRORNAS IN CARDIOMYOCYTE HYPERTROPHY%WIKIPATHWAYS_20210210%WP1544%HOMO SAPIENS	49		-0.915994	0.616848	1	1	700
1358	METABOLISM OF FAT-SOLUBLE VITAMINS%REACTOME%R-HSA-6806667.6	34		-0.915985	0.580966	1	1	665
1359	ROS AND RNS PRODUCTION IN PHAGOCYTES%REACTOME%R-HSA-1222556.9	26		-0.915859	0.5959	1	1	1111
1360	REGULATION OF TUBE SIZE%GOBP%GO:0035150	27		-0.915554	0.580745	1	1	1567
1361	REGULATION OF TUBE DIAMETER%GOBP%GO:0035296	27		-0.915111	0.59633	1	1	1567
1362	CELLULAR CARBOHYDRATE METABOLIC PROCESS%GOBP%GO:0044262	58		-0.915062	0.624123	1	1	1055
1363	NUCLEAR DNA REPLICATION%GOBP%GO:0033260	30		-0.91467	0.603269	1	1	519
1364	POSITIVE REGULATION OF KINASE ACTIVITY%GOBP%GO:0033674	224		-0.914553	0.684093	1	1	1494
1365	TISSUE DEVELOPMENT%GOBP%GO:0009888	490		-0.914524	0.741504	1	1	1037
1366	CCR1%IOB%CCR1	18		-0.913863	0.591195	1	1	892
1367	CELLULAR AMIDE METABOLIC PROCESS%GOBP%GO:0043603	418		-0.913383	0.728497	1	1	1545
1368	AMINO ACID TRANSPORT ACROSS THE PLASMA MEMBRANE%REACTOME%R-HSA-352230.3	19		-0.91324	0.590551	1	1	361
1369	NEGATIVE REGULATION OF G PROTEIN-COUPLED RECEPTOR SIGNALING PATHWAY%GOBP%GO:0045744	15		-0.913077	0.567783	1	1	962
1370	HALLMARK_UV_RESPONSE_UP%MSIGDB_C2%HALLMARK_UV_RESPONSE_UP	97		-0.913011	0.626415	1	1	957
1371	CHROMOSOMAL AND MICROSATELLITE INSTABILITY IN COLORECTAL CANCER %WIKIPATHWAYS_20210210%WP4216%HOMO SAPIENS	36		-0.912914	0.608262	1	1	676
1372	CELLULAR CALCIUM ION HOMEOSTASIS%GOBP%GO:0006874	93		-0.912705	0.640252	1	1	1778
1373	REGULATION OF CATION TRANSMEMBRANE TRANSPORT%GOBP%GO:1904062	103		-0.912575	0.641154	1	1	885
1374	CARDIAC HYPERTROPHIC RESPONSE%WIKIPATHWAYS_20210210%WP2795%HOMO SAPIENS	32		-0.910554	0.589021	1	1	700
1375	MITOTIC G2-G2 M PHASES%REACTOME%R-HSA-453274.2	113		-0.910024	0.649208	1	1	696
1376	REGULATION OF MUSCLE TISSUE DEVELOPMENT%GOBP%GO:1901861	28		-0.90976	0.606322	1	1	666
1377	EUKARYOTIC TRANSLATION TERMINATION%REACTOME%R-HSA-72764.4	88		-0.909666	0.634961	1	1	584
1378	DNA IR-DOUBLE STRAND BREAKS (DSBS) AND CELLULAR RESPONSE VIA ATM%WIKIPATHWAYS_20210210%WP3959%HOMO SAPIENS	30		-0.909639	0.597938	1	1	667
1379	SYNAPTIC VESICLE RECYCLING%GOBP%GO:0036465	27		-0.909585	0.587087	1	1	1348
1380	NEGATIVE REGULATION OF PROTEIN POLYMERIZATION%GOBP%GO:0032272	36		-0.909414	0.588235	1	1	230
1381	POSITIVE REGULATION OF RECEPTOR-MEDIATED ENDOCYTOSIS%GOBP%GO:0048260	28		-0.909262	0.60479	1	1	1478
1382	REGULATION OF BLOOD VESSEL SIZE%GOBP%GO:0050880	27		-0.909224	0.605828	1	1	1567
1383	TRANSPORT OF BILE SALTS AND ORGANIC ACIDS, METAL IONS AND AMINE COMPOUNDS%REACTOME%R-HSA-425366.3	34		-0.909103	0.584416	1	1	375
1384	POTASSIUM ION TRANSPORT%GOBP%GO:0006813	31		-0.908941	0.601997	1	1	1659
1385	SNRNA TRANSCRIPTION%GOBP%GO:0009301	29		-0.908917	0.590379	1	1	1412
1386	POSITIVE REGULATION OF STRESS-ACTIVATED PROTEIN KINASE SIGNALING CASCADE%GOBP%GO:0070304	47		-0.908724	0.616595	1	1	1519
1387	ORGANIC HYDROXY COMPOUND TRANSPORT%GOBP%GO:0015850	54		-0.908641	0.619891	1	1	288
1388	REGULATION OF PEPTIDYL-TYROSINE PHOSPHORYLATION%GOBP%GO:0050730	89		-0.90854	0.6425	1	1	1427
1389	POSITIVE REGULATION OF PROTEIN KINASE ACTIVITY%GOBP%GO:0045860	190		-0.908052	0.681159	1	1	787
1390	REGULATION OF COMPLEMENT CASCADE%REACTOME DATABASE ID RELEASE 75%977606	36		-0.908032	0.607872	1	1	1123
1391	CELLULAR RESPONSE TO INTERFERON-GAMMA%GOBP%GO:0071346	51		-0.90731	0.617647	1	1	1833
1392	REGULATION OF PHOSPHATIDYLINOSITOL 3-KINASE SIGNALING%GOBP%GO:0014066	54		-0.906707	0.608234	1	1	945
1393	AGING%GOBP%GO:0007568	42		-0.906222	0.633609	1	1	652
1394	MODULATION OF CHEMICAL SYNAPTIC TRANSMISSION%GOBP%GO:0050804	84		-0.90582	0.666242	1	1	1494
1395	POSITIVE REGULATION OF LYMPHOCYTE PROLIFERATION%GOBP%GO:0050671	46		-0.905808	0.61413	1	1	1671
1396	PROTEIN DEACYLATION%GOBP%GO:0035601	25		-0.905618	0.607196	1	1	593
1397	TCR SIGNALING IN NAIVE CD8+ T CELLS%PATHWAY INTERACTION DATABASE NCI-NATURE CURATED DATA%TCR SIGNALING IN NAIVE CD8+ T CELLS	34		-0.905607	0.603175	1	1	1016
1398	CELLULAR RESPONSE TO ENDOGENOUS STIMULUS%GOBP%GO:0071495	363		-0.905497	0.729873	1	1	1659
1399	EICOSANOID SYNTHESIS%WIKIPATHWAYS_20210210%WP167%HOMO SAPIENS	17		-0.904943	0.602804	1	1	990
1400	PURINE NUCLEOSIDE METABOLIC PROCESS%GOBP%GO:0042278	31		-0.904873	0.599144	1	1	1461
1401	POSITIVE REGULATION OF CYTOSOLIC CALCIUM ION CONCENTRATION%GOBP%GO:0007204	48		-0.904651	0.626741	1	1	1691
1402	DSRNA PROCESSING%GOBP%GO:0031050	19		-0.904647	0.618263	1	1	1264
1403	METABOLISM OF WATER-SOLUBLE VITAMINS AND COFACTORS%REACTOME%R-HSA-196849.3	80		-0.904562	0.652455	1	1	1697
1404	ERAD PATHWAY%GOBP%GO:0036503	47		-0.904241	0.64548	1	1	1634
1405	TP53 REGULATES TRANSCRIPTION OF CELL CYCLE GENES%REACTOME DATABASE ID RELEASE 75%6791312	20		-0.904019	0.599049	1	1	609
1406	DNA METABOLIC PROCESS%GOBP%GO:0006259	299		-0.90385	0.741214	1	1	714
1407	G2 M TRANSITION%REACTOME DATABASE ID RELEASE 75%69275	113		-0.903366	0.669903	1	1	696
1408	B CELL ACTIVATION%GOBP%GO:0042113	45		-0.902687	0.616438	1	1	1699
1409	CELLULAR RESPONSE TO HEAT%GOBP%GO:0034605	21		-0.902607	0.601824	1	1	563
1410	IMMUNE RESPONSE-ACTIVATING SIGNAL TRANSDUCTION%GOBP%GO:0002757	240		-0.902522	0.717892	1	1	754
1411	REGULATION OF TRANS-SYNAPTIC SIGNALING%GOBP%GO:0099177	85		-0.902353	0.650376	1	1	1494
1412	BICELLULAR TIGHT JUNCTION ASSEMBLY%GOBP%GO:0070830	27		-0.902189	0.593558	1	1	761
1413	PYRIDINE-CONTAINING COMPOUND BIOSYNTHETIC PROCESS%GOBP%GO:0072525	46		-0.901748	0.636364	1	1	1850
1414	CENTROSOME MATURATION%REACTOME DATABASE ID RELEASE 75%380287	42		-0.901723	0.608575	1	1	467
1415	HIGH-DENSITY LIPOPROTEIN PARTICLE REMODELING%GOBP%GO:0034375	15		-0.901122	0.5952	1	1	1688
1416	PRODUCTION OF SMALL RNA INVOLVED IN GENE SILENCING BY RNA%GOBP%GO:0070918	19		-0.901075	0.627726	1	1	1264
1417	POSITIVE REGULATION OF LYMPHOCYTE ACTIVATION%GOBP%GO:0051251	103		-0.900976	0.646692	1	1	1687
1418	CALCIUM ION HOMEOSTASIS%GOBP%GO:0055074	96		-0.900574	0.660448	1	1	1778
1419	AMINO SUGAR METABOLIC PROCESS%GOBP%GO:0006040	24		-0.900441	0.60438	1	1	893
1420	REGULATION OF PHOSPHOPROTEIN PHOSPHATASE ACTIVITY%GOBP%GO:0043666	24		-0.90042	0.601744	1	1	1016
1421	REGULATION OF DEVELOPMENTAL GROWTH%GOBP%GO:0048638	72		-0.900122	0.634565	1	1	837
1422	WATER-SOLUBLE VITAMIN METABOLIC PROCESS%GOBP%GO:0006767	56		-0.899934	0.643236	1	1	1697
1423	TRNA PROCESSING%GOBP%GO:0008033	51		-0.899932	0.630137	1	1	1285
1424	PROTEIN IMPORT%GOBP%GO:0017038	77		-0.899914	0.652576	1	1	1882
1425	PURINE METABOLISM AND RELATED DISORDERS%WIKIPATHWAYS_20210210%WP4224%HOMO SAPIENS	20		-0.899821	0.592593	1	1	1228
1426	REGULATION OF PHOSPHATIDYLINOSITOL 3-KINASE ACTIVITY%GOBP%GO:0043551	15		-0.899458	0.611111	1	1	877
1427	PORPHYRIN METABOLISM%REACTOME%R-HSA-189445.1	15		-0.899436	0.586922	1	1	1924
1428	SIGNALING BY INTERLEUKINS%REACTOME DATABASE ID RELEASE 75%449147	228		-0.899418	0.719512	1	1	947
1429	NEGATIVE REGULATION OF AXON EXTENSION%GOBP%GO:0030517	19		-0.899315	0.594463	1	1	1157
1430	REGULATION OF TRANSCRIPTION INITIATION FROM RNA POLYMERASE II PROMOTER%GOBP%GO:0060260	28		-0.899102	0.608434	1	1	638
1431	ENDOPLASMIC RETICULUM ORGANIZATION%GOBP%GO:0007029	51		-0.899031	0.617808	1	1	1719
1432	TRNA MODIFICATION%GOBP%GO:0006400	33		-0.898985	0.632132	1	1	1252
1433	PID_UPA_UPAR_PATHWAY%MSIGDB_C2%PID_UPA_UPAR_PATHWAY	36		-0.898578	0.644118	1	1	617
1434	GERM CELL DEVELOPMENT%GOBP%GO:0007281	29		-0.898365	0.607613	1	1	453
1435	CHEMICAL HOMEOSTASIS%GOBP%GO:0048878	334		-0.898008	0.758065	1	1	1090
1436	TRK RECEPTOR SIGNALING MEDIATED BY THE MAPK PATHWAY%PATHWAY INTERACTION DATABASE NCI-NATURE CURATED DATA%TRK RECEPTOR SIGNALING MEDIATED BY THE MAPK PATHWAY	18		-0.89688	0.61041	1	1	978
1437	RECEPTOR METABOLIC PROCESS%GOBP%GO:0043112	50		-0.8962	0.63649	1	1	1244
1438	GLUCOSE METABOLIC PROCESS%GOBP%GO:0006006	50		-0.895616	0.659218	1	1	1946
1439	EPITHELIAL TO MESENCHYMAL TRANSITION IN COLORECTAL CANCER%WIKIPATHWAYS_20210210%WP4239%HOMO SAPIENS	85		-0.895454	0.667105	1	1	1444
1440	NO/CGMP/PKG MEDIATED NEUROPROTECTION%WIKIPATHWAYS_20210210%WP4008%HOMO SAPIENS	19		-0.895427	0.615863	1	1	760
1441	TRANSCRIPTIONAL REGULATION OF WHITE ADIPOCYTE DIFFERENTIATION%REACTOME%R-HSA-381340.2	20		-0.895086	0.616145	1	1	1000
1442	REGULATION OF DEPHOSPHORYLATION%GOBP%GO:0035303	68		-0.89482	0.648721	1	1	730
1443	RECRUITMENT OF MITOTIC CENTROSOME PROTEINS AND COMPLEXES%REACTOME%R-HSA-380270.2	42		-0.894622	0.615272	1	1	467
1444	CELL CYCLE DNA REPLICATION%GOBP%GO:0044786	31		-0.89447	0.633484	1	1	519
1445	SYNAPTIC VESICLE CYCLE%GOBP%GO:0099504	43		-0.894069	0.651452	1	1	573
1446	HEAD DEVELOPMENT%GOBP%GO:0060322	152		-0.893971	0.705202	1	1	1585
1447	CELLULAR RESPONSE TO ABIOTIC STIMULUS%GOBP%GO:0071214	97		-0.893869	0.669609	1	1	698
1448	POSITIVE REGULATION OF STRESS FIBER ASSEMBLY%GOBP%GO:0051496	29		-0.893749	0.626292	1	1	162
1449	POSITIVE REGULATION OF TRANSLATIONAL INITIATION%GOBP%GO:0045948	16		-0.892868	0.595356	1	1	1360
1450	REGULATION OF ALCOHOL BIOSYNTHETIC PROCESS%GOBP%GO:1902930	16		-0.892463	0.620295	1	1	1761
1451	REGULATION OF MITOCHONDRIAL MEMBRANE PERMEABILITY%GOBP%GO:0046902	29		-0.892267	0.62519	1	1	1056
1452	TRANSLATION%REACTOME%R-HSA-72766.4	214		-0.891938	0.737723	1	1	923
1453	G PROTEIN-COUPLED RECEPTOR SIGNALING PATHWAY%GOBP%GO:0007186	162		-0.891623	0.726328	1	1	1503
1454	NEGATIVE REGULATION OF SMALL MOLECULE METABOLIC PROCESS%GOBP%GO:0062014	34		-0.891396	0.628571	1	1	1573
1455	ANTI-INFLAMMATORY RESPONSE FAVOURING LEISHMANIA PARASITE INFECTION%REACTOME DATABASE ID RELEASE 75%9662851	49		-0.891267	0.645117	1	1	1464
1456	AMYOTROPHIC LATERAL SCLEROSIS (ALS)%WIKIPATHWAYS_20210210%WP2447%HOMO SAPIENS	26		-0.891003	0.60994	1	1	1526
1457	ACTIVATION OF MAPK ACTIVITY%GOBP%GO:0000187	52		-0.890814	0.652406	1	1	1436
1458	GLYCEROPHOSPHOLIPID METABOLIC PROCESS%GOBP%GO:0006650	130		-0.890329	0.696643	1	1	1586
1459	LEISHMANIA PARASITE GROWTH AND SURVIVAL%REACTOME DATABASE ID RELEASE 75%9664433	49		-0.890272	0.639321	1	1	1464
1460	RNA POL II CTD PHOSPHORYLATION AND INTERACTION WITH CE DURING HIV INFECTION%REACTOME%R-HSA-167160.2	18		-0.890189	0.629179	1	1	1382
1461	RAS SIGNALING%WIKIPATHWAYS_20210210%WP4223%HOMO SAPIENS	92		-0.889928	0.685972	1	1	978
1462	CELLULAR RESPONSE TO ENVIRONMENTAL STIMULUS%GOBP%GO:0104004	97		-0.889862	0.685897	1	1	698
1463	G PROTEIN SIGNALING PATHWAYS%WIKIPATHWAYS_20210210%WP35%HOMO SAPIENS	59		-0.889353	0.658537	1	1	951
1464	RESPONSE TO EXTERNAL BIOTIC STIMULUS%GOBP%GO:0043207	267		-0.888964	0.758206	1	1	1217
1465	DEGRADATION OF THE EXTRACELLULAR MATRIX%REACTOME%R-HSA-1474228.4	67		-0.888907	0.667546	1	1	957
1466	PID_INTEGRIN3_PATHWAY%MSIGDB_C2%PID_INTEGRIN3_PATHWAY	42		-0.888779	0.665248	1	1	761
1467	BETA3 INTEGRIN CELL SURFACE INTERACTIONS%PATHWAY INTERACTION DATABASE NCI-NATURE CURATED DATA%BETA3 INTEGRIN CELL SURFACE INTERACTIONS	42		-0.888533	0.651389	1	1	761
1468	REGULATION OF ENDOTHELIAL CELL MIGRATION%GOBP%GO:0010594	88		-0.888189	0.672194	1	1	784
1469	MITOTIC DNA INTEGRITY CHECKPOINT%GOBP%GO:0044774	35		-0.888095	0.634897	1	1	698
1470	CELLULAR RESPONSE TO HYPOXIA%GOBP%GO:0071456	84		-0.888036	0.665043	1	1	979
1471	GLUCOSE 6-PHOSPHATE METABOLIC PROCESS%GOBP%GO:0051156	16		-0.887987	0.599359	1	1	1894
1472	HALLMARK_APICAL_SURFACE%MSIGDB_C2%HALLMARK_APICAL_SURFACE	25		-0.88785	0.628698	1	1	945
1473	EICOSANOID METABOLISM VIA CYCLO OXYGENASES (COX)%WIKIPATHWAYS_20210210%WP4719%HOMO SAPIENS	16		-0.887715	0.608696	1	1	2305
1474	AMIDE BIOSYNTHETIC PROCESS%GOBP%GO:0043604	280		-0.887647	0.769313	1	1	1357
1475	RESPONSE TO OTHER ORGANISM%GOBP%GO:0051707	267		-0.887412	0.743674	1	1	1217
1476	REGULATION OF EXIT FROM MITOSIS%GOBP%GO:0007096	24		-0.88737	0.638681	1	1	1902
1477	DNA MODIFICATION%GOBP%GO:0006304	23		-0.887112	0.627692	1	1	714
1478	POSITIVE REGULATION OF IMMUNE SYSTEM PROCESS%GOBP%GO:0002684	474		-0.887086	0.795855	1	1	1687
1479	REGULATION OF CELL CYCLE ARREST%GOBP%GO:0071156	39		-0.886978	0.645205	1	1	748
1480	CELLULAR RESPONSE TO INTERLEUKIN-6%GOBP%GO:0071354	17		-0.88692	0.627228	1	1	638
1481	ACTIN FILAMENT ORGANIZATION%GOBP%GO:0007015	135		-0.886876	0.70441	1	1	1316
1482	NOTCH SIGNALING%WIKIPATHWAYS_20210210%WP268%HOMO SAPIENS	18		-0.886485	0.62013	1	1	679
1483	UROKINASE-TYPE PLASMINOGEN ACTIVATOR (UPA) AND UPAR-MEDIATED SIGNALING%PATHWAY INTERACTION DATABASE NCI-NATURE CURATED DATA%UROKINASE-TYPE PLASMINOGEN ACTIVATOR (UPA) AND UPAR-MEDIATED SIGNALING	36		-0.886414	0.640056	1	1	617
1484	REGULATION OF PEPTIDE SECRETION%GOBP%GO:0002791	84		-0.886357	0.68262	1	1	1463
1485	NRF2 PATHWAY%WIKIPATHWAYS_20210210%WP2884%HOMO SAPIENS	73		-0.88635	0.675359	1	1	173
1486	POSITIVE REGULATION OF MAPK CASCADE%GOBP%GO:0043410	172		-0.886058	0.722222	1	1	1463
1487	SNRNA TRANSCRIPTION BY RNA POLYMERASE II%GOBP%GO:0042795	29		-0.885637	0.648286	1	1	1412
1488	RESPONSE TO TEMPERATURE STIMULUS%GOBP%GO:0009266	46		-0.885421	0.649513	1	1	1762
1489	REGULATION OF NITRIC-OXIDE SYNTHASE ACTIVITY%GOBP%GO:0050999	21		-0.884319	0.630915	1	1	1258
1490	CELLULAR PROCESS INVOLVED IN REPRODUCTION IN MULTICELLULAR ORGANISM%GOBP%GO:0022412	43		-0.884312	0.668648	1	1	1498
1491	NONSENSE MEDIATED DECAY (NMD) INDEPENDENT OF THE EXON JUNCTION COMPLEX (EJC)%REACTOME%R-HSA-975956.1	91		-0.883934	0.699229	1	1	584
1492	FOLIC ACID-CONTAINING COMPOUND METABOLIC PROCESS%GOBP%GO:0006760	16		-0.883791	0.627172	1	1	1513
1493	RNA POLYMERASE III TRANSCRIPTION TERMINATION%REACTOME%R-HSA-73980.3	15		-0.883059	0.600321	1	1	1363
1494	POLYSACCHARIDE METABOLIC PROCESS%GOBP%GO:0005976	27		-0.881995	0.633041	1	1	1281
1495	RESPONSE TO INTERLEUKIN-6%GOBP%GO:0070741	18		-0.88195	0.634868	1	1	638
1496	CELL-CELL JUNCTION ASSEMBLY%GOBP%GO:0007043	55		-0.881895	0.700809	1	1	761
1497	SIGNALING BY NUCLEAR RECEPTORS%REACTOME%R-HSA-9006931.5	134		-0.881522	0.716507	1	1	1021
1498	RHYTHMIC PROCESS%GOBP%GO:0048511	41		-0.880573	0.648968	1	1	980
1499	AURORA B SIGNALING%PATHWAY INTERACTION DATABASE NCI-NATURE CURATED DATA%AURORA B SIGNALING	26		-0.880444	0.62866	1	1	162
1500	POSITIVE REGULATION OF JNK CASCADE%GOBP%GO:0046330	35		-0.880073	0.645299	1	1	1519
1501	PHOSPHOLIPID BIOSYNTHETIC PROCESS%GOBP%GO:0008654	95		-0.879978	0.702366	1	1	1586
1502	COMPLEMENT CASCADE%REACTOME%R-HSA-166658.4	45		-0.879892	0.65035	1	1	813
1503	REGULATION OF NEURON MIGRATION%GOBP%GO:2001222	17		-0.879828	0.63252	1	1	1302
1504	MEMBRANE ASSEMBLY%GOBP%GO:0071709	19		-0.879574	0.618605	1	1	630
1505	POSITIVE REGULATION OF IMMUNE RESPONSE%GOBP%GO:0050778	366		-0.879444	0.803571	1	1	1016
1506	TAT-MEDIATED ELONGATION OF THE HIV-1 TRANSCRIPT%REACTOME DATABASE ID RELEASE 75%167246	30		-0.879385	0.644543	1	1	1382
1507	HSP90 CHAPERONE CYCLE FOR SHRS%REACTOME%R-HSA-3371497.4	31		-0.879384	0.656609	1	1	173
1508	TOLL LIKE RECEPTOR 4 (TLR4) CASCADE%REACTOME DATABASE ID RELEASE 75%166016	62		-0.879175	0.684499	1	1	716
1509	REGULATION OF EPITHELIAL CELL APOPTOTIC PROCESS%GOBP%GO:1904035	35		-0.878976	0.673945	1	1	869
1510	CELLULAR RESPONSE TO DECREASED OXYGEN LEVELS%GOBP%GO:0036294	84		-0.878789	0.684421	1	1	979
1511	REGULATION OF PROTEIN SECRETION%GOBP%GO:0050708	82		-0.878158	0.679389	1	1	1440
1512	RNA POL II CTD PHOSPHORYLATION AND INTERACTION WITH CE%REACTOME DATABASE ID RELEASE 75%77075	18		-0.877996	0.636508	1	1	1382
1513	TNF ALPHA SIGNALING PATHWAY%WIKIPATHWAYS_20210210%WP231%HOMO SAPIENS	48		-0.877682	0.684951	1	1	966
1514	NEGATIVE REGULATION OF MITOTIC NUCLEAR DIVISION%GOBP%GO:0045839	19		-0.877506	0.638932	1	1	1507
1515	POSITIVE REGULATION OF PRODUCTION OF MOLECULAR MEDIATOR OF IMMUNE RESPONSE%GOBP%GO:0002702	38		-0.876029	0.662031	1	1	1016
1516	COGNITION%GOBP%GO:0050890	50		-0.875935	0.674785	1	1	652
1517	CELLULAR RESPONSE TO KETONE%GOBP%GO:1901655	23		-0.875878	0.645963	1	1	1000
1518	NEGATIVE REGULATION OF MYELOID CELL DIFFERENTIATION%GOBP%GO:0045638	22		-0.875839	0.627481	1	1	1494
1519	NEURON DIFFERENTIATION%GOBP%GO:0030182	323		-0.875549	0.782839	1	1	955
1520	REGULATION OF AXON EXTENSION INVOLVED IN AXON GUIDANCE%GOBP%GO:0048841	17		-0.875332	0.63354	1	1	1157
1521	MACROPHAGE ACTIVATION%GOBP%GO:0042116	15		-0.875051	0.636943	1	1	6
1522	REGULATION OF GLIOGENESIS%GOBP%GO:0014013	25		-0.874945	0.639876	1	1	1484
1523	GPCR DOWNSTREAM SIGNALLING%REACTOME DATABASE ID RELEASE 75%388396	190		-0.874616	0.753143	1	1	999
1524	ACTIVATION OF CYSTEINE-TYPE ENDOPEPTIDASE ACTIVITY INVOLVED IN APOPTOTIC PROCESS%GOBP%GO:0006919	38		-0.874439	0.668038	1	1	992
1525	POSITIVE REGULATION OF DEFENSE RESPONSE%GOBP%GO:0031349	231		-0.874341	0.766075	1	1	945
1526	REGULATION OF ANATOMICAL STRUCTURE MORPHOGENESIS%GOBP%GO:0022603	428		-0.874313	0.825131	1	1	1027
1527	TELOMERE C-STRAND (LAGGING STRAND) SYNTHESIS%REACTOME DATABASE ID RELEASE 75%174417	19		-0.874251	0.668675	1	1	115
1528	CYTOPLASMIC RIBOSOMAL PROTEINS%WIKIPATHWAYS_20210210%WP477%HOMO SAPIENS	82		-0.874096	0.705506	1	1	584
1529	FORMATION OF HIV-1 ELONGATION COMPLEX CONTAINING HIV-1 TAT%REACTOME%R-HSA-167200.3	30		-0.873857	0.667618	1	1	1382
1530	REGULATION OF FIBROBLAST PROLIFERATION%GOBP%GO:0048145	28		-0.873531	0.646884	1	1	1402
1531	REGULATION OF CELLULAR RESPONSE TO GROWTH FACTOR STIMULUS%GOBP%GO:0090287	103		-0.872981	0.709877	1	1	679
1532	DEFENSE RESPONSE%GOBP%GO:0006952	339		-0.872761	0.807571	1	1	1675
1533	INTERACTION WITH SYMBIONT%GOBP%GO:0051702	47		-0.872623	0.680822	1	1	1123
1534	BREAST CANCER PATHWAY%WIKIPATHWAYS_20210210%WP4262%HOMO SAPIENS	58		-0.872486	0.703146	1	1	1402
1535	NEGATIVE REGULATION OF PROTEOLYSIS INVOLVED IN CELLULAR PROTEIN CATABOLIC PROCESS%GOBP%GO:1903051	37		-0.872022	0.684736	1	1	481
1536	AXONOGENESIS%GOBP%GO:0007409	160		-0.872005	0.755582	1	1	955
1537	DNA-TEMPLATED TRANSCRIPTION, INITIATION%GOBP%GO:0006352	52		-0.871586	0.695291	1	1	1547
1538	NEGATIVE REGULATION OF NEUROGENESIS%GOBP%GO:0050768	75		-0.871534	0.699749	1	1	1597
1539	HETEROCYCLE BIOSYNTHETIC PROCESS%GOBP%GO:0018130	424		-0.871335	0.838877	1	1	1520
1540	HISTONE DEACETYLATION%GOBP%GO:0016575	17		-0.870972	0.649435	1	1	533
1541	EPITHELIAL CELL MIGRATION%GOBP%GO:0010631	45		-0.870882	0.696581	1	1	928
1542	NEURAL CREST CELL MIGRATION DURING DEVELOPMENT%WIKIPATHWAYS_20210210%WP4564%HOMO SAPIENS	23		-0.870807	0.627608	1	1	954
1543	PROTEIN HOMOOLIGOMERIZATION%GOBP%GO:0051260	57		-0.870705	0.658635	1	1	1837
1544	SIGNALING BY NOTCH%REACTOME%R-HSA-157118.5	130		-0.870592	0.725653	1	1	679
1545	REGULATION OF INTERLEUKIN-8 PRODUCTION%GOBP%GO:0032677	42		-0.869698	0.675214	1	1	720
1546	ACTIVATION OF INNATE IMMUNE RESPONSE%GOBP%GO:0002218	162		-0.86909	0.772675	1	1	803
1547	HIV TRANSCRIPTION ELONGATION%REACTOME DATABASE ID RELEASE 75%167169	30		-0.869034	0.671111	1	1	1382
1548	MYELOID CELL DIFFERENTIATION%GOBP%GO:0030099	60		-0.868732	0.681046	1	1	945
1549	HS-GAG DEGRADATION%REACTOME%R-HSA-2024096.1	19		-0.868591	0.641975	1	1	783
1550	HALLMARK_INFLAMMATORY_RESPONSE%MSIGDB_C2%HALLMARK_INFLAMMATORY_RESPONSE	73		-0.868542	0.702446	1	1	1011
1551	TELOMERE MAINTENANCE VIA SEMI-CONSERVATIVE REPLICATION%GOBP%GO:0032201	19		-0.867982	0.656832	1	1	115
1552	PROTEIN DEACETYLATION%GOBP%GO:0006476	18		-0.867951	0.642072	1	1	533
1553	DISEASES OF GLYCOSYLATION%REACTOME%R-HSA-3781865.1	88		-0.86794	0.704485	1	1	1379
1554	LYSOSOME LOCALIZATION%GOBP%GO:0032418	25		-0.867892	0.657186	1	1	1087
1555	CELLULAR POLYSACCHARIDE METABOLIC PROCESS%GOBP%GO:0044264	27		-0.867849	0.652632	1	1	1281
1556	ACTIVATION OF IMMUNE RESPONSE%GOBP%GO:0002253	292		-0.867788	0.806383	1	1	754
1557	PLATELET DEGRANULATION%GOBP%GO:0002576	114		-0.866783	0.749701	1	1	1808
1558	DEVELOPMENTAL PROCESS INVOLVED IN REPRODUCTION%GOBP%GO:0003006	75		-0.86597	0.72987	1	1	1659
1559	NUCLEOBASE-CONTAINING SMALL MOLECULE BIOSYNTHETIC PROCESS%GOBP%GO:0034404	77		-0.865531	0.692612	1	1	1779
1560	POSITIVE REGULATION OF CELLULAR AMIDE METABOLIC PROCESS%GOBP%GO:0034250	76		-0.865492	0.705489	1	1	638
1561	TRANSCRIPTION OF THE HIV GENOME%REACTOME DATABASE ID RELEASE 75%167172	39		-0.865417	0.663805	1	1	1547
1562	PROTEIN COMPLEX OLIGOMERIZATION%GOBP%GO:0051259	82		-0.865221	0.689833	1	1	1837
1563	SPROUTING ANGIOGENESIS%GOBP%GO:0002040	30		-0.865099	0.661786	1	1	666
1564	TOLL RECEPTOR SIGNALING PATHWAY%PANTHER PATHWAY%P00054	19		-0.864926	0.643436	1	1	805
1565	POSITIVE REGULATION OF CELL CYCLE G1/S PHASE TRANSITION%GOBP%GO:1902808	18		-0.864765	0.674923	1	1	948
1566	HOMOTYPIC CELL-CELL ADHESION%GOBP%GO:0034109	42		-0.863634	0.6983	1	1	1011
1567	IMMUNE RESPONSE-ACTIVATING CELL SURFACE RECEPTOR SIGNALING PATHWAY%GOBP%GO:0002429	185		-0.863107	0.761905	1	1	1016
1568	FORMATION OF HIV ELONGATION COMPLEX IN THE ABSENCE OF HIV TAT%REACTOME%R-HSA-167152.3	31		-0.863008	0.675676	1	1	1382
1569	REGULATION OF PROTEOLYSIS%GOBP%GO:0030162	330		-0.86235	0.828905	1	1	1023
1570	TRANSITION METAL ION HOMEOSTASIS%GOBP%GO:0055076	53		-0.86233	0.701072	1	1	947
1571	REGULATION OF TYPE I INTERFERON-MEDIATED SIGNALING PATHWAY%GOBP%GO:0060338	20		-0.862242	0.649123	1	1	534
1572	POSITIVE REGULATION OF INNATE IMMUNE RESPONSE%GOBP%GO:0045089	193		-0.861816	0.808607	1	1	945
1573	SKIN DEVELOPMENT%GOBP%GO:0043588	124		-0.861359	0.744552	1	1	990
1574	RESPONSE TO OXYGEN-CONTAINING COMPOUND%GOBP%GO:1901700	411		-0.860895	0.848898	1	1	1672
1575	REGULATION OF TRANSCRIPTION FROM RNA POLYMERASE II PROMOTER IN RESPONSE TO STRESS%GOBP%GO:0043618	71		-0.860796	0.720779	1	1	704
1576	EPIDERMIS DEVELOPMENT%GOBP%GO:0008544	123		-0.860661	0.758323	1	1	976
1577	EPITHELIUM MIGRATION%GOBP%GO:0090132	45		-0.860636	0.707015	1	1	928
1578	SYNAPTIC VESICLE LOCALIZATION%GOBP%GO:0097479	44		-0.86035	0.693198	1	1	1348
1579	IMMUNE RESPONSE-REGULATING SIGNALING PATHWAY%GOBP%GO:0002764	253		-0.860188	0.806732	1	1	754
1580	CELLULAR RESPONSE TO ACID CHEMICAL%GOBP%GO:0071229	50		-0.860021	0.707483	1	1	1660
1581	REGULATION OF ACTIN CYTOSKELETON REORGANIZATION%GOBP%GO:2000249	24		-0.860021	0.657534	1	1	1856
1582	POSITIVE REGULATION OF PROGRAMMED CELL DEATH%GOBP%GO:0043068	212		-0.859794	0.804989	1	1	1010
1583	REGULATION OF ENDOTHELIAL CELL APOPTOTIC PROCESS%GOBP%GO:2000351	27		-0.859745	0.673499	1	1	563
1584	NEGATIVE REGULATION OF NUCLEAR DIVISION%GOBP%GO:0051784	19		-0.859424	0.652038	1	1	1507
1585	CHEMOKINE SIGNALING PATHWAY%WIKIPATHWAYS_20210210%WP3929%HOMO SAPIENS	82		-0.8593	0.728792	1	1	1464
1586	REGULATION OF HYDROLASE ACTIVITY%GOBP%GO:0051336	429		-0.858438	0.867556	1	1	1023
1587	VASCULATURE DEVELOPMENT%GOBP%GO:0001944	137		-0.85787	0.780285	1	1	1730
1588	REGULATION OF CALCIUM ION TRANSMEMBRANE TRANSPORT%GOBP%GO:1903169	38		-0.857248	0.697642	1	1	280
1589	ION HOMEOSTASIS%REACTOME%R-HSA-5578775.2	27		-0.857162	0.693098	1	1	988
1590	TOLL-LIKE RECEPTOR CASCADES%REACTOME DATABASE ID RELEASE 75%168898	79		-0.856936	0.725744	1	1	957
1591	ARRHYTHMOGENIC RIGHT VENTRICULAR CARDIOMYOPATHY%WIKIPATHWAYS_20210210%WP2118%HOMO SAPIENS	44		-0.856828	0.68932	1	1	891
1592	REGULATORY CIRCUITS OF THE STAT3 SIGNALING PATHWAY%WIKIPATHWAYS_20210210%WP4538%HOMO SAPIENS	25		-0.856519	0.684848	1	1	1016
1593	NEGATIVE REGULATION OF NEURON DEATH%GOBP%GO:1901215	45		-0.856283	0.69774	1	1	1856
1594	POSITIVE REGULATION OF CARBOHYDRATE METABOLIC PROCESS%GOBP%GO:0045913	29		-0.856215	0.691285	1	1	1589
1595	APPENDAGE DEVELOPMENT%GOBP%GO:0048736	23		-0.856174	0.661316	1	1	679
1596	RESPONSE TO DRUG%GOBP%GO:0042493	200		-0.856149	0.829596	1	1	1495
1597	GLYCEROLIPID CATABOLIC PROCESS%GOBP%GO:0046503	23		-0.855138	0.676602	1	1	1548
1598	NEGATIVE REGULATION OF IMMUNE RESPONSE%GOBP%GO:0050777	87		-0.854991	0.758621	1	1	1672
1599	LIMB DEVELOPMENT%GOBP%GO:0060173	23		-0.854867	0.671429	1	1	679
1600	CARDIOVASCULAR SYSTEM DEVELOPMENT%GOBP%GO:0072358	137		-0.854579	0.782402	1	1	1730
1601	RESPONSE TO MOLECULE OF BACTERIAL ORIGIN%GOBP%GO:0002237	82		-0.854089	0.735142	1	1	999
1602	UREA CYCLE AND METABOLISM OF AMINO GROUPS%WIKIPATHWAYS_20210210%WP497%HOMO SAPIENS	17		-0.853922	0.668232	1	1	2397
1603	ESTABLISHMENT OF SYNAPTIC VESICLE LOCALIZATION%GOBP%GO:0097480	44		-0.853845	0.696078	1	1	1348
1604	SELENIUM MICRONUTRIENT NETWORK%WIKIPATHWAYS_20210210%WP15%HOMO SAPIENS	60		-0.853753	0.722527	1	1	1804
1605	GLUCOSE METABOLISM%REACTOME%R-HSA-70326.8	70		-0.853652	0.715232	1	1	1904
1606	INNATE IMMUNE RESPONSE-ACTIVATING SIGNAL TRANSDUCTION%GOBP%GO:0002758	142		-0.853542	0.774796	1	1	945
1607	PYRIMIDINE NUCLEOTIDE METABOLIC PROCESS%GOBP%GO:0006220	16		-0.853505	0.657686	1	1	1367
1608	AMINO ACID AND DERIVATIVE METABOLISM%REACTOME DATABASE ID RELEASE 75%71291	259		-0.853502	0.82876	1	1	1862
1609	MITOCHONDRION LOCALIZATION%GOBP%GO:0051646	18		-0.853375	0.691083	1	1	1683
1610	RESPONSE TO INTERFERON-GAMMA%GOBP%GO:0034341	56		-0.853129	0.721997	1	1	1065
1611	REGULATION OF TOLL-LIKE RECEPTOR SIGNALING PATHWAY%GOBP%GO:0034121	26		-0.85309	0.695266	1	1	1013
1612	INITIATION OF TRANSCRIPTION AND TRANSLATION ELONGATION AT THE HIV-1 LTR%WIKIPATHWAYS_20210210%WP3414%HOMO SAPIENS	18		-0.853009	0.659016	1	1	679
1613	G1 TO S CELL CYCLE CONTROL%WIKIPATHWAYS_20210210%WP45%HOMO SAPIENS	26		-0.852963	0.666168	1	1	696
1614	POSITIVE REGULATION OF ERK1 AND ERK2 CASCADE%GOBP%GO:0070374	70		-0.85258	0.741558	1	1	1519
1615	APOPTOSIS SIGNALING PATHWAY%PANTHER PATHWAY%P00006	50		-0.852238	0.720165	1	1	992
1616	TOXIN METABOLIC PROCESS%GOBP%GO:0009404	15		-0.85221	0.661905	1	1	1386
1617	FC-GAMMA RECEPTOR SIGNALING PATHWAY INVOLVED IN PHAGOCYTOSIS%GOBP%GO:0038096	54		-0.85214	0.726902	1	1	974
1618	POSITIVE REGULATION OF MUSCLE CELL DIFFERENTIATION%GOBP%GO:0051149	30		-0.851654	0.6754	1	1	707
1619	CELLULAR DIVALENT INORGANIC CATION HOMEOSTASIS%GOBP%GO:0072503	100		-0.851298	0.745614	1	1	1778
1620	ANATOMICAL STRUCTURE FORMATION INVOLVED IN MORPHOGENESIS%GOBP%GO:0048646	214		-0.851076	0.81573	1	1	804
1621	POSITIVE REGULATION OF NUCLEOTIDE METABOLIC PROCESS%GOBP%GO:0045981	19		-0.850943	0.662669	1	1	692
1622	MULTI-ORGANISM REPRODUCTIVE PROCESS%GOBP%GO:0044703	124		-0.850831	0.773318	1	1	901
1623	RESPONSE TO ORGANOPHOSPHORUS%GOBP%GO:0046683	23		-0.850737	0.702786	1	1	1659
1624	LOCALIZATION OF CELL%GOBP%GO:0051674	400		-0.850556	0.867769	1	1	1027
1625	CELLULAR RESPONSE TO OXYGEN-CONTAINING COMPOUND%GOBP%GO:1901701	326		-0.850546	0.86688	1	1	1672
1626	REGULATION OF MECP2 EXPRESSION AND ACTIVITY%REACTOME%R-HSA-9022692.1	16		-0.850044	0.63738	1	1	533
1627	PROTEIN PROCESSING%GOBP%GO:0016485	87		-0.849961	0.745932	1	1	1827
1628	SPINDLE ORGANIZATION%GOBP%GO:0007051	109		-0.849268	0.759124	1	1	687
1629	REGULATION OF SEQUESTERING OF CALCIUM ION%GOBP%GO:0051282	34		-0.84906	0.70767	1	1	1691
1630	REGULATION OF CATION CHANNEL ACTIVITY%GOBP%GO:2001257	43		-0.848952	0.719247	1	1	760
1631	REGULATION OF INNATE IMMUNE RESPONSE%GOBP%GO:0045088	243		-0.848891	0.82321	1	1	1013
1632	RECRUITMENT OF NUMA TO MITOTIC CENTROSOMES%REACTOME%R-HSA-380320.2	42		-0.848546	0.723796	1	1	467
1633	CYTOSOLIC DNA-SENSING PATHWAY%WIKIPATHWAYS_20210210%WP4655%HOMO SAPIENS	31		-0.848238	0.709581	1	1	1363
1634	BLOOD COAGULATION, FIBRIN CLOT FORMATION%GOBP%GO:0072378	25		-0.84806	0.686822	1	1	1011
1635	ESTABLISHMENT OR MAINTENANCE OF CELL POLARITY%GOBP%GO:0007163	90		-0.847956	0.750611	1	1	730
1636	EPITHELIAL TUBE FORMATION%GOBP%GO:0072175	21		-0.84761	0.680945	1	1	1802
1637	CIRCADIAN CLOCK%REACTOME DATABASE ID RELEASE 75%400253	21		-0.847073	0.679878	1	1	881
1638	ORGAN OR TISSUE SPECIFIC IMMUNE RESPONSE%GOBP%GO:0002251	16		-0.846847	0.658228	1	1	1013
1639	REGULATION OF ANTIGEN RECEPTOR-MEDIATED SIGNALING PATHWAY%GOBP%GO:0050854	29		-0.8468	0.709199	1	1	1016
1640	SMOOTH MUSCLE CONTRACTION%REACTOME DATABASE ID RELEASE 75%445355	28		-0.846544	0.689755	1	1	1791
1641	POSITIVE REGULATION OF STRESS-ACTIVATED MAPK CASCADE%GOBP%GO:0032874	46		-0.846491	0.714481	1	1	1519
1642	MONOSACCHARIDE CATABOLIC PROCESS%GOBP%GO:0046365	41		-0.84605	0.723647	1	1	1850
1643	CELL MOTILITY%GOBP%GO:0048870	400		-0.845749	0.873563	1	1	1027
1644	CELL JUNCTION ASSEMBLY%GOBP%GO:0034329	95		-0.845639	0.778761	1	1	761
1645	POSITIVE REGULATION OF T CELL ACTIVATION%GOBP%GO:0050870	79		-0.845579	0.741894	1	1	1016
1646	IMMUNE RESPONSE-REGULATING CELL SURFACE RECEPTOR SIGNALING PATHWAY INVOLVED IN PHAGOCYTOSIS%GOBP%GO:0002433	54		-0.844215	0.740027	1	1	974
1647	ANATOMICAL STRUCTURE MATURATION%GOBP%GO:0071695	27		-0.843657	0.701649	1	1	1546
1648	NEOVASCULARISATION PROCESSES%WIKIPATHWAYS_20210210%WP4331%HOMO SAPIENS	25		-0.843641	0.715805	1	1	663
1649	CELLULAR RESPONSE TO OXYGEN LEVELS%GOBP%GO:0071453	92		-0.843607	0.761724	1	1	979
1650	POSITIVE REGULATION OF LIPID KINASE ACTIVITY%GOBP%GO:0090218	15		-0.843342	0.686335	1	1	2323
1651	ANGIOGENESIS%PANTHER PATHWAY%P00005	87		-0.842891	0.75443	1	1	954
1652	CORTICAL CYTOSKELETON ORGANIZATION%GOBP%GO:0030865	31		-0.842801	0.697674	1	1	730
1653	PID_ATM_PATHWAY%MSIGDB_C2%PID_ATM_PATHWAY	18		-0.842744	0.679818	1	1	667
1654	MEMBRANE BIOGENESIS%GOBP%GO:0044091	20		-0.842716	0.726283	1	1	630
1655	STEROL TRANSPORT%GOBP%GO:0015918	36		-0.842592	0.726208	1	1	1562
1656	POSITIVE REGULATION OF ATP METABOLIC PROCESS%GOBP%GO:1903580	18		-0.842274	0.698609	1	1	692
1657	CENTRAL NERVOUS SYSTEM NEURON AXONOGENESIS%GOBP%GO:0021955	15		-0.841943	0.671031	1	1	954
1658	POSITIVE REGULATION OF LIPID LOCALIZATION%GOBP%GO:1905954	38		-0.841881	0.731812	1	1	1688
1659	CHOLESTEROL TRANSPORT%GOBP%GO:0030301	36		-0.84188	0.703281	1	1	1562
1660	FATTY ACID TRANSPORT%GOBP%GO:0015908	25		-0.841846	0.705344	1	1	913
1661	POSITIVE REGULATION OF PEPTIDE SECRETION%GOBP%GO:0002793	48		-0.841795	0.725714	1	1	1802
[truncated: 737 more rows]

## Sheet: SupTable4C
Supplementary Table 4C. Functional enrichment for proteins similarly identified in sEV and lEV were analyzed using their identification count across human datasets in EVpedia. ES, enrichment score; NES, normalized enrichment score; NOM, nominal; FDR, false discovery rate; FWER, family-wise error rate.
[truncated: 822 more rows]
